# Supplementary material for: Classic Hodgkin Lymphoma Refractory for ABVD Treatment Is Characterized by Pathologically Activated Signal Transduction Pathways as Revealed by Proteomic Profiling
Source: Cancers (Basel). 2022 Jan 4;14(1):247. doi: 10.3390/cancers14010247 (PMC8750842; doi:10.3390/cancers14010247)
Supplement: Supplementary file 1 [file cancers-14-00247-s001.zip]

Archive with 5 entries (5 files):
- Supplementary Figure S1.pdf
- Supplementary Table S1.xls
- Supplementary Table S2.xlsx
- Supplementary Table S3.xlsx
- Supplementary Table S4.xlsx
