# Supplementary material for: Classic Hodgkin Lymphoma Refractory for ABVD Treatment Is Characterized by Pathologically Activated Signal Transduction Pathways as Revealed by Proteomic Profiling
Source: Cancers (Basel). 2022 Jan 4;14(1):247. doi: 10.3390/cancers14010247 (PMC8750842; doi:10.3390/cancers14010247)
Supplement: Supplementary file 1 [file cancers-14-00247-s001.zip › Supplementary Table S1.xls]

## Sheet: Sheet0
© 2000-2020 QIAGEN. All rights reserved.
Ingenuity Canonical Pathways	-log(p-value)	Ratio	z-score	Molecules
GNRH Signaling	2.24	0.184	1.134	GNAI2,GNAQ,GNB1,MAP2K3,PAK2,PRKACB,RALB
α-Adrenergic Signaling	2.16	0.2	1	GNAI2,GNAQ,GNB1,PRKACB,PYGB,RALB
Endocannabinoid Developing Neuron Pathway	2.02	0.188	1.342	AKT1S1,GNAI2,GNB1,MAP2K3,PRKACB,RALB
IL-1 Signaling	1.87	0.2	-	GNAI2,GNAQ,GNB1,MAP2K3,PRKACB
Endocannabinoid Cancer Inhibition Pathway	1.73	0.185	0.447	AKT1S1,GNAI2,GNAQ,MAP2K3,PRKACB
Glutamate Receptor Signaling	1.72	0.5	-	GLUL,GNB1
Ephrin Receptor Signaling	1.68	0.146	2.646	ARPC5,CRK,GNAI2,GNAQ,GNB1,PAK2,RALB
Endocannabinoid Neuronal Synapse Pathway	1.65	0.211	2	GNAI2,GNAQ,GNB1,PRKACB
Angiopoietin Signaling	1.65	0.211	1	CRK,PAK2,RALB,STAT5B
Phagosome Maturation	1.57	0.129	-	ATP6V1G1,CTSA,CTSC,CTSZ,DYNLT1,NAPA,RAB5C,RAB7A
Insulin Receptor Signaling	1.56	0.15	1.342	CRK,INPP5D,PPP1R12A,PRKACB,RALB,TRIP10
G Beta Gamma Signaling	1.54	0.167	1.342	GNAI2,GNAQ,GNB1,PRKACB,RALB
GPCR-Mediated Integration of Enteroendocrine Signaling Exemplified by an L Cell	1.52	0.25	-	GNAI2,GNAQ,PRKACB
Chondroitin Sulfate Degradation (Metazoa)	1.51	0.4	-	GALNS,HEXA
Superpathway of Melatonin Degradation	1.51	0.4	-	IL4I1,SULT1A1
Melatonin Signaling	1.5	0.19	0	GNAI2,GNAQ,MAP2K3,PRKACB
CXCR4 Signaling	1.46	0.143	2.236	CRK,GNAI2,GNAQ,GNB1,PAK2,RALB
Cardiac Hypertrophy Signaling (Enhanced)	1.46	0.123	0.707	DIAPH1,GNAI2,GNAQ,GNB1,HSPB1,MAP2K3,PRKACB,RALB
Cellular Effects of Sildenafil (Viagra)	1.43	0.182	-	MYH14,MYH9,PPP1R12A,PRKACB
Molecular Mechanisms of Cancer	1.39	0.119	-	CRK,GNAI2,GNAQ,MAP2K3,NCSTN,PAK2,PRKACB,RALB
Cardiac Hypertrophy Signaling	1.39	0.127	0.378	GNAI2,GNAQ,GNB1,HSPB1,MAP2K3,PRKACB,RALB
CCR3 Signaling in Eosinophils	1.38	0.152	-	GNAI2,GNB1,PAK2,PPP1R12A,RALB
P2Y Purigenic Receptor Signaling Pathway	1.38	0.152	0.447	GNAI2,GNAQ,GNB1,PRKACB,RALB
Role of NFAT in Cardiac Hypertrophy	1.38	0.136	0	GNAI2,GNAQ,GNB1,MAP2K3,PRKACB,RALB
PPARα/RXRα Activation	1.38	0.136	-1.342	APOA2,GNAQ,MAP2K3,PRKACB,RALB,STAT5B
Corticotropin Releasing Hormone Signaling	1.37	0.174	-	ARPC5,GNAI2,GNAQ,PRKACB
Phototransduction Pathway	1.35	0.333	-	GNB1,PRKACB
