# Supplementary material for: Classic Hodgkin Lymphoma Refractory for ABVD Treatment Is Characterized by Pathologically Activated Signal Transduction Pathways as Revealed by Proteomic Profiling
Source: Cancers (Basel). 2022 Jan 4;14(1):247. doi: 10.3390/cancers14010247 (PMC8750842; doi:10.3390/cancers14010247)
Supplement: Supplementary file 1 [file cancers-14-00247-s001.zip › Supplementary Table S2.xlsx]

## Sheet: 3920 proteins indentified with 
1	2	3	4	5	6	7	8	9	10	11	12	13	14	15	16	17	18	19	20	21	22	23	24	25	26	27	28	29	30	31	32	33	34	35	36	C: Only identified by site	C: Reverse	C: Potential contaminant	N: Peptides	N: Razor + unique peptides	N: Unique peptides	N: Sequence coverage [%]	N: Unique + razor sequence coverage [%]	N: Unique sequence coverage [%]	N: Mol. weight [kDa]	N: Q-value	N: Score	N: Intensity	N: MS/MS count
NaN	NaN	NaN	NaN	NaN	NaN	23.5318	NaN	22.9512	NaN	22.1422	25.3039	24.5009	22.4331	NaN	NaN	23.0106	NaN	NaN	21.9288	23.3818	NaN	NaN	NaN	NaN	20.8409	24.4544	NaN	NaN	23.4644	NaN	NaN	22.1215	NaN	NaN	NaN				2	2	2	15.4	15.4	15.4	12.839	0	10.453	247570000	12
NaN	NaN	NaN	NaN	NaN	NaN	NaN	NaN	NaN	NaN	NaN	NaN	NaN	NaN	NaN	24.1526	NaN	NaN	NaN	NaN	NaN	NaN	NaN	NaN	NaN	NaN	NaN	NaN	NaN	NaN	NaN	NaN	NaN	NaN	NaN	NaN				2	2	2	21.8	21.8	21.8	13.203	0.003457	2.5215	54302000	2
22.1268	22.6701	NaN	NaN	NaN	NaN	24.9228	23.3204	23.2814	23.8394	24.1525	23.4709	24.1243	24.355	24.6836	23.6903	NaN	23.3621	22.7639	24.5163	24.3263	23.5993	NaN	25.1772	24.091	NaN	23.6782	25.2441	NaN	24.5554	24.4113	23.643	23.5605	NaN	NaN	NaN				2	2	2	19.8	19.8	19.8	24.757	0	10.236	552680000	42
NaN	NaN	NaN	NaN	NaN	NaN	NaN	20.2239	22.8144	21.5631	22.7093	NaN	25.882	23.2134	NaN	24.4142	22.3736	NaN	NaN	NaN	NaN	NaN	NaN	NaN	NaN	NaN	NaN	NaN	22.3051	NaN	NaN	NaN	NaN	NaN	NaN	NaN				2	2	2	27.4	27.4	27.4	12.82	0	262.54	250590000	11
NaN	NaN	NaN	NaN	NaN	NaN	NaN	NaN	22.9105	21.0721	21.9046	21.2367	25.583	NaN	NaN	22.5778	NaN	NaN	NaN	22.4415	NaN	NaN	NaN	NaN	NaN	NaN	23.8176	20.8031	NaN	20.3912	NaN	NaN	23.929	NaN	21.7422	NaN				2	2	2	24.8	24.8	24.8	12.674	0.00027594	5.2193	151650000	14
25.0016	24.0772	24.502	NaN	24.635	NaN	NaN	25.0486	NaN	25.2045	NaN	24.6543	23.1506	NaN	24.8775	24.3374	NaN	25.0344	24.0282	24.6372	22.8154	25.418	24.9822	24.4143	25.2394	25.4271	23.7418	24.6132	25.3363	25.4962	25.1252	25.3175	NaN	25.5491	22.8479	NaN				2	2	2	8.1	8.1	8.1	34.792	0	111.68	880580000	37
NaN	NaN	NaN	NaN	NaN	NaN	21.6783	21.6589	21.2909	NaN	21.1656	NaN	21.1707	21.7608	NaN	23.5135	NaN	NaN	NaN	22.0308	NaN	NaN	NaN	20.3903	NaN	NaN	21.2676	20.5988	21.4209	NaN	NaN	NaN	20.9148	NaN	NaN	NaN				3	3	3	12	12	12	56.919	0.001907	2.8122	56202000	14
23.2693	22.9484	23.3676	23.717	24.3552	23.0067	22.7344	24.1304	23.1668	24.0488	22.2663	24.1565	24.5676	22.7461	24.7774	23.4512	24.2447	23.6772	23.7581	23.5443	23.4578	24.8067	24.2632	23.9914	23.5554	24.1845	24.2469	24.1193	23.7319	23.1225	24.0349	23.7274	NaN	23.5854	24.4371	24.0721				14	14	14	19.6	19.6	19.6	117.97	0	323.31	598780000	122
NaN	NaN	NaN	NaN	NaN	23.7568	NaN	22.5523	NaN	NaN	NaN	NaN	22.5735	21.9185	NaN	NaN	NaN	23.1396	NaN	21.5562	NaN	NaN	21.1868	NaN	22.364	NaN	NaN	NaN	23.0839	NaN	NaN	22.1774	NaN	NaN	NaN	NaN				3	3	3	10.2	10.2	10.2	56.376	0	94.556	72864000	22
NaN	NaN	NaN	NaN	NaN	21.4388	21.8077	NaN	NaN	NaN	NaN	NaN	NaN	21.4651	21.2194	NaN	NaN	NaN	NaN	21.9831	21.3746	NaN	NaN	NaN	21.0826	NaN	22.4017	NaN	NaN	21.4294	21.279	NaN	21.3824	21.3905	NaN	NaN				6	6	6	18	18	18	67.867	0	12.769	41403000	21
NaN	NaN	NaN	NaN	NaN	NaN	NaN	NaN	NaN	NaN	NaN	NaN	NaN	NaN	NaN	23.2149	23.431	NaN	NaN	NaN	NaN	NaN	NaN	NaN	19.7982	NaN	NaN	NaN	NaN	NaN	19.9459	NaN	20.8627	NaN	NaN	NaN				2	2	2	1.9	1.9	1.9	165.74	0	67.997	54914000	8
NaN	23.6141	21.0855	20.2764	NaN	NaN	NaN	NaN	NaN	NaN	NaN	NaN	20.205	NaN	NaN	NaN	NaN	NaN	19.1375	19.9666	22.3675	NaN	NaN	NaN	20.5484	20.5196	NaN	19.9393	20.3301	20.0144	NaN	NaN	NaN	NaN	NaN	NaN				3	3	3	7.6	7.6	7.6	58.077	0	11.985	75586000	12
NaN	NaN	20.8464	NaN	NaN	20.9863	NaN	NaN	NaN	NaN	20.9804	NaN	NaN	21.1375	21.4252	20.4978	21.1389	NaN	NaN	22.3391	21.5581	21.5883	NaN	NaN	21.1479	21.3657	21.198	20.7064	NaN	NaN	20.9193	NaN	20.4652	21.8364	NaN	NaN				5	5	5	3.5	3.5	3.5	254.81	0	35.949	52958000	26
21.9752	NaN	NaN	21.7655	22.4882	NaN	NaN	NaN	NaN	21.5003	NaN	NaN	21.2075	NaN	21.3762	NaN	NaN	23.7651	22.6488	22.1659	21.195	21.887	21.8248	21.553	21.7365	22.5503	NaN	NaN	NaN	NaN	20.6574	22.2414	NaN	21.9266	NaN	22.1932				3	2	2	4.8	3.7	3.7	81.56	0	6.0532	96751000	17
21.9696	22.6101	20.7073	21.5029	22.2928	22.0627	20.7679	22.3503	NaN	NaN	21.6394	NaN	21.7562	NaN	20.9315	22.2435	22.6971	22.3373	21.7249	21.6047	NaN	22.7082	NaN	22.0124	21.3459	21.8403	NaN	NaN	NaN	NaN	NaN	NaN	NaN	NaN	22.3861	21.6645				3	3	3	34.3	34.3	34.3	14.604	0.00026076	4.069	117550000	26
NaN	NaN	NaN	NaN	NaN	NaN	NaN	NaN	NaN	NaN	NaN	NaN	NaN	NaN	NaN	NaN	NaN	NaN	NaN	21.1756	NaN	NaN	NaN	NaN	NaN	NaN	20.8217	NaN	20.5369	NaN	20.8285	NaN	NaN	NaN	NaN	NaN				2	2	2	2.6	2.6	2.6	154.06	0.0064316	2.1844	8399800	5
NaN	NaN	NaN	NaN	NaN	NaN	NaN	NaN	NaN	22.4179	NaN	22.571	NaN	NaN	22.4251	NaN	NaN	NaN	NaN	21.8608	22.2298	NaN	NaN	NaN	22.3636	22.3123	NaN	22.4643	NaN	NaN	22.7795	NaN	NaN	NaN	NaN	NaN				2	2	2	3.8	3.8	3.8	71.351	0.0021221	2.6745	67302000	12
NaN	NaN	NaN	NaN	NaN	NaN	NaN	NaN	NaN	NaN	21.8369	NaN	NaN	NaN	NaN	NaN	NaN	NaN	NaN	NaN	NaN	NaN	NaN	NaN	NaN	NaN	NaN	NaN	NaN	NaN	NaN	23.0437	21.9179	NaN	NaN	NaN				8	2	2	9	2.3	2.3	121.44	0.0019333	2.957	21793000	6
20.8656	NaN	NaN	20.7991	NaN	NaN	NaN	NaN	20.9368	NaN	NaN	NaN	NaN	NaN	NaN	NaN	19.997	NaN	NaN	NaN	NaN	NaN	NaN	NaN	20.8097	NaN	NaN	NaN	NaN	NaN	NaN	NaN	NaN	NaN	NaN	20.2126				2	2	2	8.7	8.7	8.7	38.658	0.00026413	4.2848	16412000	6
21.8703	22.8474	23.9725	23.4665	24.0349	23.472	21.3456	23.1707	21.2125	23.7528	22.4816	24.0992	23.3817	23.0654	23.6573	NaN	23.7423	23.7821	23.81	23.7838	23.1719	23.903	22.9102	23.1414	24.1297	23.8792	23.9658	23.2507	21.8132	23.1531	23.5141	23.7831	23.1959	23.7029	22.6613	23.6256				14	14	14	8.2	8.2	8.2	266.38	0	128.12	460640000	142
21.5095	24.3904	23.3951	22.6442	24.8384	21.672	NaN	23.9866	21.7423	22.9446	21.6317	24.0085	22.9248	NaN	22.9526	24.0599	23.4317	23.4012	23.3919	23.9212	22.4673	23.5101	22.0043	22.5861	24.7191	24.0655	21.8224	22.8148	23.6136	NaN	22.1029	24.1939	22.504	23.3777	21.5595	23.6101				13	13	13	17.4	17.4	17.4	164.81	0	323.31	437170000	101
22.7136	NaN	NaN	23.1379	NaN	NaN	22.6294	22.498	NaN	NaN	21.768	21.6522	23.2528	NaN	NaN	21.3549	23.976	NaN	22.1197	NaN	23.5516	22.7583	NaN	22.2759	22.3562	NaN	22.5674	NaN	NaN	NaN	NaN	22.8528	22.6891	NaN	NaN	20.8171				2	2	2	16.8	16.8	16.8	14.688	0.0027816	2.5612	164560000	17
24.3212	23.0682	23.7846	24.1987	23.692	23.6972	22.9564	23.3487	NaN	23.1147	22.946	23.0392	23.3569	22.1278	22.3429	23.26	22.6499	24.6921	23.9181	23.0235	23.546	23.116	23.158	23.6696	23.495	23.8596	22.9101	23.3495	24.1828	22.7996	22.8172	23.2392	23.0403	23.1616	24.5296	24.0234				8	8	8	44.2	44.2	44.2	34.006	0	34.038	501450000	86
21.1632	21.7353	21.4648	21.5787	22.3678	21.266	21.8394	NaN	22.251	NaN	NaN	21.4804	21.6469	NaN	21.4153	NaN	20.6049	22.5673	20.8867	21.2642	21.7978	21.7086	21.1785	21.2101	21.6882	21.2982	NaN	21.1015	21.6145	NaN	NaN	21.304	NaN	21.9794	21.9198	21.9017				2	2	2	7.8	7.8	7.8	33.62	0	10.169	92794000	42
21.9484	23.6057	25.0093	NaN	23.649	20.1906	NaN	NaN	NaN	23.3696	NaN	23.6339	NaN	NaN	22.117	NaN	20.9451	23.17	23.817	22.5022	22.5865	20.3052	24.0288	23.1912	22.8969	24.2555	NaN	NaN	23.1587	21.4803	NaN	23.5883	NaN	23.534	23.338	NaN				7	7	7	12.4	12.4	12.4	100.9	0	56.631	246360000	46
23.568	23.7174	23.1172	24.278	23.8131	23.4151	23.4385	22.4548	22.6042	23.1569	NaN	24.3135	21.688	NaN	NaN	22.6311	NaN	22.5769	23.929	22.3776	22.513	23.9608	23.598	22.7101	23.036	22.9901	22.3164	22.4431	23.0755	22.491	NaN	21.0668	22.3968	23.0402	21.893	23.7894				4	4	4	8.3	8.3	8.3	61.501	0	15.238	317790000	48
NaN	NaN	22.47	19.6337	20.529	20.7335	NaN	NaN	NaN	21.4738	NaN	20.3744	NaN	NaN	23.4687	20.3991	22.6455	NaN	21.2479	23.56	21.8223	22.2293	NaN	NaN	20.7692	NaN	22.1811	19.1547	20.3638	22.6175	22.1455	NaN	21.9529	21.3317	19.8431	NaN				8	8	8	5.8	5.8	5.8	226.37	0	49.568	93952000	57
20.4243	23.0221	21.0681	20.2574	19.0604	26.5442	21.724	NaN	23.11	25.7532	27.9539	26.4069	NaN	27.5466	23.6975	29.7468	23.1739	NaN	20.953	20.0249	20.2894	NaN	NaN	NaN	20.6422	NaN	23.4077	NaN	20.6101	25.5193	25.0836	20.3512	22.5786	25.5742	27.1142	NaN				24	24	24	18.4	18.4	18.4	247.17	0	323.31	3796000000	186
NaN	NaN	NaN	NaN	NaN	NaN	NaN	NaN	NaN	NaN	NaN	21.2877	NaN	NaN	NaN	NaN	NaN	NaN	NaN	NaN	NaN	NaN	NaN	NaN	NaN	NaN	NaN	NaN	NaN	NaN	20.7287	NaN	NaN	NaN	NaN	NaN				2	2	2	3.5	3.5	3.5	107.87	0.00027541	5.1434	7893500	3
NaN	NaN	NaN	NaN	NaN	NaN	NaN	23.456	NaN	NaN	NaN	NaN	NaN	NaN	22.3092	NaN	22.115	NaN	NaN	NaN	NaN	NaN	22.4814	23.0572	NaN	NaN	NaN	NaN	NaN	NaN	NaN	NaN	NaN	NaN	NaN	NaN				5	5	5	5.6	5.6	5.6	161.1	0	8.0633	51613000	13
NaN	23.0193	18.8162	NaN	NaN	24.0257	20.2225	19.7004	22.1518	20.9208	21.3473	23.0127	NaN	26.3901	NaN	28.8548	NaN	NaN	NaN	NaN	23.4594	NaN	NaN	NaN	NaN	NaN	NaN	NaN	NaN	21.5572	23.2929	18.043	NaN	20.9652	NaN	19.5052				17	17	17	12.2	12.2	12.2	279.93	0	249.64	1514300000	67
NaN	NaN	NaN	NaN	NaN	19.9191	NaN	NaN	NaN	20.8214	NaN	21.4096	19.4332	NaN	NaN	NaN	19.4048	NaN	NaN	20.5602	21.7132	21.9746	NaN	NaN	NaN	NaN	20.1382	20.4735	20.9032	NaN	NaN	NaN	NaN	19.9617	NaN	NaN				3	3	3	20.7	20.7	20.7	25.423	0	10.793	25023000	25
26.8934	27.8391	28.6409	28.3181	28.3997	27.2197	25.482	27.6256	27.6034	27.9174	26.9935	27.6194	26.9576	27.3789	27.9928	27.2442	27.9651	27.5232	28.6164	27.9243	27.2833	27.8989	27.9958	27.7102	27.913	29.1418	27.3375	27.7532	27.9793	27.6775	27.1364	28.3233	26.894	27.7463	27.9524	27.4263				25	25	24	40.6	40.6	39.7	116.44	0	323.31	9055200000	420
25.8109	26.1258	26.4162	26.6982	26.4721	25.8307	25.7435	25.8718	24.9262	26.0838	25.1247	26.3847	25.9614	25.8376	26.4343	25.3141	25.3448	26.0857	26.4993	26.3838	25.7236	26.3499	26.1798	26.3103	26.3383	26.3618	26.2122	26.2867	25.9845	26.1362	26.0836	26.1717	25.7475	26.2448	25.7174	26.6252				13	13	13	19.1	19.1	19.1	105.47	0	323.31	2816400000	218
NaN	NaN	22.0436	21.2539	22.7782	NaN	22.1732	21.8734	NaN	NaN	NaN	21.3638	NaN	21.2937	22.4406	21.0296	NaN	NaN	21.5613	21.7514	22.0768	21.7764	21.6192	NaN	NaN	NaN	21.342	NaN	NaN	NaN	21.7417	22.1017	21.059	NaN	NaN	NaN				4	4	4	13.2	13.2	13.2	49.994	0	6.441	71084000	27
23.4679	23.6724	22.9607	23.5472	22.9635	23.3013	23.9391	23.5147	23.4303	23.0539	NaN	22.448	22.8484	23.5907	22.6109	NaN	22.352	23.3798	23.818	NaN	23.2594	23.1595	NaN	24.4158	21.6601	22.6661	NaN	23.9178	23.284	NaN	23.9577	23.3026	NaN	22.9018	23.0424	NaN				3	3	3	32	32	32	10.92	0	13.658	290640000	47
28.9475	28.436	27.5892	28.911	28.5375	28.3981	28.4082	28.6905	27.9874	28.2993	27.9855	28.3359	28.3387	28.2665	28.4885	27.3389	27.7885	28.5809	28.9916	28.1178	27.6315	29.1114	28.827	28.8929	28.4408	27.9463	27.6269	28.7069	28.5734	28.0234	27.9762	28.814	27.9913	27.9398	27.869	28.1775				7	7	6	6.1	6.1	5.5	205.42	0	323.31	14729000000	301
22.6083	21.9285	22.0527	21.4356	NaN	21.877	22.5082	22.2346	NaN	NaN	22.0579	21.8642	21.6899	NaN	NaN	22.2592	NaN	22.8688	21.8622	NaN	NaN	22.044	22.4225	22.0049	NaN	NaN	21.6882	22.4767	22.9457	21.4978	21.8295	22.7599	NaN	20.8003	22.5333	22.4639				4	4	4	43.7	43.7	43.7	11.133	0.0040928	2.4173	133180000	27
NaN	21.9405	23.3613	NaN	22.5241	NaN	22.6275	NaN	NaN	21.9088	22.7916	NaN	22.942	23.4793	22.5175	22.2833	22.6368	NaN	NaN	23.3373	22.899	22.6412	21.7449	21.6518	21.911	NaN	23.164	22.65	NaN	23.1204	22.3238	NaN	23.5352	22.8237	23.1515	22.4189				5	5	5	12	12	12	72.911	0	61.518	194260000	38
NaN	22.0268	22.8354	23.0968	NaN	22.3998	22.3339	22.0012	NaN	22.7067	22.0066	NaN	21.9315	NaN	22.9827	NaN	NaN	22.1773	22.5077	23.0059	NaN	22.8726	22.55	22.4842	22.8124	22.563	22.7664	22.8708	NaN	22.8063	22.9862	22.9595	22.1903	22.8233	NaN	22.7612				6	6	6	16.2	16.2	16.2	75.042	0	31.549	183580000	66
22.6198	23.6888	23.6108	22.7965	NaN	22.5243	23.0403	23.7168	21.6143	23.1233	22.572	NaN	23.0376	NaN	23.857	21.6981	NaN	NaN	23.056	25.4808	NaN	21.2965	24.2622	24.1333	24.4846	24.5318	23.8374	23.9778	23.4848	23.8711	23.3097	24.0561	23.1386	23.8872	24.3815	24.2648				17	9	9	55.7	33.7	33.7	49.129	0	44.709	432750000	67
25.425	27.2329	27.3475	27.2492	27.6958	27.1376	26.7303	26.4377	26.5372	26.5297	26.493	26.0373	26.3462	26.9018	27.4832	25.7264	27.0636	26.7019	27.4265	26.394	26.9903	27.1382	26.2081	26.8209	26.6529	25.404	26.0053	27.2388	25.5139	27.034	26.6241	27.111	26.8976	26.798	25.8258	26.5721				12	12	12	57.4	57.4	57.4	36.071	0	284.21	4625300000	176
26.3235	25.2935	25.3423	26.1155	26.2359	25.565	25.224	25.4256	24.6582	25.0228	25.1322	24.7037	24.606	24.4174	24.2485	24.3001	22.3387	26.6132	25.3319	25.738	24.5835	25.1288	25.7316	25.8919	24.846	24.9602	24.3164	24.553	25.15	24.2734	24.2167	24.2678	24.6249	25.5185	25.7068	26.1868				9	9	9	37.6	37.6	37.6	37.419	0	323.31	1640400000	218
25.6365	25.7444	26.3816	25.8354	25.68	26.6706	25.6543	25.249	26.2021	25.6623	26.1361	25.6775	25.6515	26.9695	26.7184	25.4404	26.291	26.0959	25.4321	26.481	26.112	25.7074	24.9123	25.4356	25.6333	25.3867	26.3566	25.9338	25.0451	26.389	26.4787	25.1408	26.0491	25.9366	25.659	25.0599				23	23	23	33.9	33.9	33.9	121.68	0	323.31	2716700000	385
25.5016	25.0053	26.7201	26.2153	26.1416	26.6867	26.373	26.5513	26.4053	25.8097	26.1545	25.8639	26.8577	26.3044	25.6881	26.7648	25.747	25.9369	25.6918	26.7012	26.3271	26.1408	25.5688	26.2691	26.259	25.7357	26.568	25.7707	26.2468	26.0495	26.3824	25.8638	25.9119	26.12	26.5543	26.7529				21	21	19	30.6	30.6	28.3	124.84	0	323.31	3174100000	393
27.1461	26.5714	25.6721	26.3588	26.6308	26.0768	26.5359	26.4368	25.5769	25.699	25.806	25.3122	26.5542	25.952	24.6272	26.0019	25.3736	26.9772	26.3199	25.7231	25.8505	25.8474	26.0941	25.8933	25.9527	26.1439	24.801	25.6853	26.3128	25.1913	25.3531	26.1518	25.4559	25.4541	26.04	25.8154				5	5	5	32.7	32.7	32.7	23.354	0	128	3190500000	201
NaN	NaN	23.7939	23.0503	23.3704	23.0759	23.4762	NaN	22.7922	22.6579	22.625	22.8493	22.5619	22.3896	NaN	NaN	21.1463	NaN	23.4287	22.8934	22.9919	23.4	NaN	22.8209	22.1212	NaN	NaN	22.9103	22.9077	NaN	NaN	22.5866	21.9675	NaN	22.2537	23.3773				2	2	2	13.4	13.4	13.4	26.099	0	36.26	188170000	30
25.1201	25.0127	25.9279	25.3141	25.9915	25.1616	25.0344	24.7609	24.2277	25.4552	24.6834	26.0335	26.0581	24.5576	25.1434	24.3582	24.9379	25.7449	25.8727	25.2364	25.1934	26.0653	25.0612	25.5768	25.9034	25.6355	25.117	25.521	25.4619	25.4186	25.3966	26.023	25.0407	25.2023	24.2107	24.6358				4	4	4	17.3	17.3	17.3	37.636	0	125.62	1742600000	72
NaN	23.5688	24.162	23.394	23.8384	23.4424	23.0386	23.1822	NaN	NaN	NaN	22.8565	NaN	22.864	NaN	23.1864	23.6069	23.5087	24.0603	22.9715	22.7336	23.3896	NaN	24.1949	23.2377	23.7547	22.6134	23.0134	23.3277	NaN	23.2631	23.3882	NaN	22.353	22.6451	23.0576				5	5	5	12.6	12.6	12.6	72.453	0	14.9	324090000	39
26.3609	26.0383	26.0822	25.6706	25.68	26.7169	26.0282	26.0611	25.0532	25.7406	24.9301	24.9519	26.758	25.3135	25.7485	24.5059	24.6893	26.1591	25.1879	26.7046	24.6755	25.1696	24.3477	26.1643	25.7168	24.2522	24.7965	25.2136	25.7138	25.1474	24.5437	25.5458	24.7256	24.9958	25.5141	23.7243				5	5	3	25.4	25.4	15.8	34.69	0	78.343	2159000000	132
NaN	NaN	21.8591	NaN	20.5852	21.9483	NaN	NaN	NaN	20.724	NaN	NaN	NaN	NaN	NaN	NaN	NaN	NaN	20.7787	19.6881	NaN	21.5643	NaN	NaN	NaN	NaN	NaN	21.2775	NaN	21.0528	22.1246	NaN	NaN	NaN	NaN	NaN				2	2	2	4.4	4.4	4.4	67.764	0.00026205	4.1476	37356000	12
NaN	19.3916	22.5933	22.4715	23.3299	NaN	NaN	22.0706	21.1396	22.3246	20.2884	NaN	NaN	22.468	22.2825	23.8084	21.5986	22.0661	21.1935	23.987	22.3362	NaN	NaN	NaN	22.7312	NaN	22.9909	22.4682	NaN	22.9359	23.198	22.0727	22.6688	21.7794	23.0392	NaN				7	7	7	9.9	9.9	9.9	116.19	0	67.795	188340000	51
22.7259	23.4497	24.0299	23.0897	24.0278	23.4038	23.236	23.1064	NaN	22.5166	22.45	24.2695	NaN	20.4077	21.7417	23.1663	24.0483	NaN	23.2052	23.2185	24.3978	23.8338	22.9556	23.5983	NaN	21.0574	NaN	22.9623	23.0746	23.0994	22.559	22.6167	NaN	22.4341	21.8353	NaN				5	5	5	29	29	29	23.705	0	46.854	332820000	78
NaN	21.9935	NaN	22.4861	NaN	NaN	NaN	NaN	NaN	NaN	NaN	NaN	NaN	NaN	21.669	NaN	NaN	NaN	22.9658	21.5453	NaN	NaN	NaN	23.0389	22.7439	22.8552	NaN	22.2269	NaN	22.0833	22.345	NaN	NaN	20.9887	NaN	NaN				3	3	3	9.8	9.8	9.8	52.863	0	5.4614	81358000	13
26.8681	27.0393	26.9074	27.1213	27.5162	27.0916	26.6487	27.1089	26.4241	26.5382	26.3269	26.7438	26.3948	26.3086	26.4866	26.449	26.5025	27.2211	27.1336	26.4603	26.1307	26.7121	26.9518	26.7353	26.7645	26.7013	26.5108	26.4753	26.7934	25.8346	26.6733	26.9035	26.1387	26.8252	26.6148	26.6007				10	10	10	32.2	32.2	32.2	47.463	0	323.31	4498600000	259
24.3527	25.3519	25.2816	24.7425	25.5206	25.0154	24.301	24.7528	24.3378	24.212	24.2565	23.8076	24.6898	23.2306	24.1058	27.5107	26.568	24.3888	24.408	25.4018	25.6644	25.9269	24.6307	24.542	25.2302	25.6269	23.9052	24.4726	24.3985	24.1669	24.5533	25.7802	24.2553	23.9494	25.2373	25.6014				13	13	13	43.2	43.2	43.2	52.904	0	323.31	1916200000	165
24.4713	22.7599	NaN	23.4422	23.7507	21.5422	22.8917	23.454	NaN	22.5373	23.0229	23.0363	NaN	22.1533	22.331	NaN	NaN	24.6619	NaN	22.5519	22.892	NaN	23.0062	NaN	22.5086	22.9846	22.6721	22.4485	24.0217	22.5755	NaN	23.6857	22.5482	23.6302	22.8814	22.8205				4	4	4	26	26	26	24.682	0	10.501	294570000	42
27.3488	26.2096	25.5968	26.2123	26.0217	25.6959	26.0112	25.4384	24.742	25.2335	24.8187	25.0191	25.2479	24.8398	24.0062	23.2931	23.6337	26.8367	26.4521	24.7381	24.6434	24.1523	26.5355	24.9167	24.7019	NaN	23.728	25.1496	26.6013	23.6882	24.1841	25.8811	24.0406	25.1125	24.6648	24.3046				3	3	3	48.5	48.5	48.5	7.4016	0	7.4396	1808800000	89
24.0498	NaN	24	24.5	NaN	NaN	24.9866	23.9027	24.1446	23.2317	23.9252	23.4189	23.8299	24.9694	24.2261	23.1137	NaN	24.1267	23.7128	24.1003	NaN	NaN	24.1984	23.0588	NaN	23.3615	NaN	23.831	23.5745	23.1481	24.2166	23.5738	23.7075	23.1798	24.2534	22.9011				4	4	4	33.8	33.8	33.8	21.671	0	191.62	446840000	43
21.4998	22.0263	22.2594	22.654	21.933	20.8622	22.329	22.0025	NaN	22.1609	21.8024	21.6953	21.4479	NaN	21.914	21.3516	22.2704	21.9042	22.2133	21.2524	NaN	21.7898	22.0578	22.843	22.1605	22.4833	21.6449	21.9736	21.5977	22.1357	NaN	22.2579	20.3659	21.4825	21.5754	21.3138				5	5	5	7.9	7.9	7.9	120.5	0	31.121	145260000	43
23.6275	23.0738	22.9021	NaN	24.2483	22.5581	22.8097	22.5574	NaN	22.7208	22.5954	22.3145	NaN	NaN	22.341	22.2669	NaN	23.0958	23.7564	22.4517	23.0897	23.8335	22.671	23.647	23.5458	24.3279	21.3679	NaN	23.011	NaN	21.6248	23.237	21.8377	23.2039	22.4239	23.1285				2	2	2	3	3	3	110.11	0	243.51	255690000	35
22.9809	25.0141	23.5888	23.2686	23.3098	23.994	24.059	22.8641	NaN	23.2507	24.1365	23.5036	23.9705	NaN	23.1861	23.5522	24.3479	23.4228	23.5118	22.8986	23.5225	23.6445	23.4772	NaN	23.5066	20.9043	22.7119	23.226	NaN	23.149	NaN	23.7271	22.6841	23.1443	22.8698	24.9738				6	6	6	32.6	32.6	32.6	36.521	0	66.424	487510000	52
NaN	NaN	21.4885	21.2536	NaN	21.7684	NaN	NaN	21.4908	NaN	21.3874	22.1358	NaN	22.1952	21.5752	21.0384	21.6753	NaN	21.06	21.0921	NaN	21.4431	NaN	NaN	21.3524	NaN	21.3265	NaN	NaN	21.5049	NaN	20.2929	21.6762	20.9604	21.2263	21.4136				3	3	3	4.3	4.3	4.3	110.66	0.00098111	3.158	63156000	19
29.8941	29.1862	29.3456	29.7605	29.2605	29.8691	29.5354	29.909	29.5651	29.2552	29.4843	29.2362	29.5539	29.4521	29.1174	28.9763	28.5048	29.7778	29.4097	29.1837	29.4292	29.645	29.408	29.8254	28.9629	29.1273	28.8814	29.3217	29.9673	28.6942	28.9471	29.6198	29.0068	29.2307	29.5479	28.9264				12	12	12	68	68	68	26.922	0	323.31	29150000000	686
28.186	28.0142	28.054	28.3615	28.3675	27.6295	27.7522	27.6296	27.4525	27.7708	27.325	27.609	27.7479	27.1733	27.6147	27.6742	27.0569	27.8097	28.339	27.5981	27.1656	27.8736	27.8204	28.0918	28.5025	29.0694	26.982	27.793	28.0647	27.2445	27.471	28.3808	27.1212	27.2403	28.1816	28.4759				8	8	8	29.4	29.4	29.4	37.563	0	323.31	9344500000	247
22.429	23.1317	24.4151	NaN	22.8536	22.7022	NaN	23.3127	NaN	23.6824	22.3406	23.7141	23.5235	NaN	23.4702	NaN	22.7847	23.0117	22.9729	24.6984	NaN	24.7679	23.5284	23.8362	24.0854	24.7151	NaN	23.8684	21.3898	23.2371	24.0035	23.9432	22.6507	24.3428	22.6568	23.4864				9	9	9	13.4	13.4	13.4	119.48	0	56.717	385410000	80
NaN	NaN	NaN	NaN	NaN	NaN	NaN	NaN	NaN	NaN	NaN	NaN	22.8704	NaN	NaN	NaN	NaN	NaN	NaN	NaN	NaN	23.8062	NaN	NaN	NaN	NaN	NaN	NaN	NaN	NaN	NaN	NaN	NaN	NaN	NaN	NaN				3	3	3	11	11	11	54.122	0.000258	3.9071	26137000	5
NaN	NaN	NaN	NaN	NaN	NaN	NaN	NaN	NaN	NaN	NaN	NaN	NaN	NaN	NaN	NaN	NaN	NaN	NaN	NaN	NaN	NaN	NaN	NaN	NaN	NaN	NaN	NaN	NaN	22.0755	21.9545	NaN	NaN	NaN	NaN	NaN				4	4	4	6.8	6.8	6.8	102.23	0	6.6529	47316000	5
NaN	NaN	21.1215	21.9892	22.3068	22.8559	NaN	NaN	22.8239	22.2698	NaN	23.5146	22.2718	23.1575	NaN	22.7608	23.9396	NaN	22.2872	21.1531	24.3319	22.4243	NaN	21.886	22.2602	NaN	23.2218	NaN	NaN	22.1901	22.7305	NaN	22.8312	21.9293	22.7168	23.1581				4	4	4	11.6	11.6	11.6	66.86	0	262.45	199850000	41
23.7994	22.567	22.6798	23.3944	NaN	20.5706	22.8702	NaN	NaN	NaN	NaN	NaN	NaN	NaN	NaN	NaN	NaN	20.9435	23.2444	NaN	NaN	23.2178	NaN	NaN	22.0941	22.2268	NaN	NaN	23.3181	NaN	NaN	NaN	NaN	21.8105	23.3211	NaN				2	2	2	16.8	16.8	16.8	20.747	0.00050213	3.4415	89797000	14
26.1959	26.9733	26.209	26.8129	26.938	26.0281	26.7354	25.7477	25.7974	26.7425	26.1626	26.5597	26.0192	25.7887	26.0835	26.0946	26.1568	26.7094	26.7282	26.2963	26.1582	26.5219	26.856	26.5812	26.4689	26.6958	26.7259	26.1674	26.3287	26.3457	26.4111	26.7128	26.5119	26.769	26.0231	26.8284				20	20	20	29	29	29	123.63	0	323.31	3811100000	374
23.6342	24.7268	23.7086	21.0782	22.8047	22.9783	NaN	NaN	22.6322	23.5314	23.1286	23.6665	NaN	22.0493	22.4974	NaN	24.7003	NaN	23.5923	23.6054	22.3984	22.5372	23.3133	24.1096	23.9176	NaN	22.5423	23.636	23.1933	22.6906	NaN	23.3953	NaN	23.0793	23.731	22.5433				2	2	2	16.3	16.3	16.3	19.526	0	6.3126	403350000	42
NaN	NaN	NaN	NaN	NaN	NaN	NaN	NaN	NaN	NaN	NaN	NaN	NaN	NaN	NaN	NaN	NaN	NaN	NaN	NaN	NaN	NaN	NaN	NaN	NaN	NaN	22.5246	NaN	NaN	NaN	NaN	NaN	NaN	NaN	23.0235	NaN				4	4	3	10.9	10.9	8.6	63.704	0.0044934	2.297	14204000	5
25.6198	25.0447	25.4343	26.2209	26.1635	26.0906	25.8339	25.2894	25.2373	25.242	25.5199	25.4227	26.2981	25.7065	25.7218	24.9311	25.8097	25.9561	25.6172	25.7688	26.1738	25.9123	25.5463	25.4878	25.9292	26.1318	25.8707	25.2923	25.7139	25.3846	25.455	25.5741	25.5924	25.4789	26.0154	26.0104				18	18	18	40.5	40.5	40.5	78.099	0	323.31	2208900000	318
23.6825	25.088	24.739	23.773	24.4499	24.142	24.6956	24.5192	23.7753	24.1402	23.8799	24.2212	24.3051	23.8189	24.3438	24.5066	24.5092	24.3095	24.5854	24.3896	23.6529	24.112	24.2273	24.327	23.9425	24.0701	23.8087	24.5505	24.3124	24.0918	24.3042	24.2588	23.7462	24.0364	24.1197	23.7503				5	5	5	18.3	18.3	18.3	39.336	0	130.41	829510000	181
NaN	23.8329	NaN	23.9688	NaN	NaN	NaN	26.1585	24.8372	NaN	24.0084	24.5379	26.2757	24.4464	NaN	23.8667	NaN	26.9724	NaN	NaN	NaN	23.8857	NaN	NaN	23.8926	22.7514	NaN	NaN	24.5025	NaN	NaN	24.6478	NaN	NaN	NaN	24.1372				2	2	2	54.7	54.7	54.7	5.8874	0.00026702	4.5206	689060000	17
21.3026	NaN	NaN	NaN	NaN	NaN	NaN	NaN	NaN	NaN	NaN	NaN	NaN	NaN	NaN	NaN	NaN	NaN	NaN	NaN	NaN	NaN	NaN	21.3611	NaN	NaN	NaN	NaN	NaN	NaN	NaN	NaN	NaN	NaN	NaN	21.7638				3	3	3	4.3	4.3	4.3	100.89	0.0047075	2.2849	11356000	4
NaN	NaN	NaN	NaN	NaN	23.1072	22.7733	NaN	21.3502	21.6695	22.7633	21.6541	NaN	22.3871	23.6779	23.1682	21.3862	NaN	NaN	NaN	22.4758	NaN	NaN	NaN	NaN	NaN	23.1398	22.0473	NaN	23.081	22.8291	20.8614	22.5163	NaN	NaN	NaN				6	6	6	4.5	4.5	4.5	214.84	0	8.4068	132330000	37
NaN	NaN	NaN	19.9212	NaN	20.6292	NaN	NaN	23.6308	NaN	22.4502	NaN	NaN	25.0747	NaN	20.8484	23.1273	NaN	NaN	NaN	21.7325	NaN	NaN	NaN	NaN	NaN	25.5606	NaN	NaN	20.0974	21.062	NaN	22.875	NaN	22.8267	NaN				6	6	6	10.4	10.4	10.4	87.097	0	35.886	146750000	26
NaN	22.1633	22.2521	22.6266	22.6704	21.6697	NaN	NaN	NaN	NaN	22.1681	NaN	NaN	NaN	22.3394	NaN	21.6153	21.6208	NaN	22.0822	NaN	NaN	NaN	NaN	22.815	22.9327	22.2424	21.7775	NaN	NaN	22.103	NaN	NaN	22.4165	22.0237	22.6752				2	2	2	6.9	6.9	6.9	81.852	0	18.697	89900000	18
25.3158	19.5136	25.6873	25.8011	25.753	24.4689	NaN	25.669	23.8582	24.5779	24.8103	NaN	NaN	NaN	NaN	24.5388	23.5194	25.8106	25.76	24.9088	25.1379	25.2731	NaN	21.5018	24.374	24.1349	24.0805	NaN	24.8713	24.8438	24.7653	25.1077	NaN	25.5227	NaN	18.9945				2	2	2	27.2	27.2	27.2	9.3697	0	5.9821	972290000	43
26.1876	25.3927	25.1884	26.6598	26.1061	25.7151	25.7302	25.8121	25.3497	25.8381	25.9616	26.2973	25.7483	25.0449	25.5079	24.3557	25.2552	25.4776	26.1059	25.4726	25.8958	26.3098	26.1291	25.8798	26.1207	26.3485	26.002	25.2094	26.1907	26.0189	25.6755	26.3818	25.272	26.3913	25.6078	25.7602				6	6	6	37.4	37.4	37.4	34.577	0	190.41	2556800000	172
23.4297	23.5968	24.6044	22.7125	23.9245	NaN	21.5323	23.7042	NaN	24.5063	22.4484	23.4397	23.0015	NaN	24.2608	22.906	22.1724	NaN	22.2575	24.0613	24.0975	24.073	22.1551	23.81	23.7918	25.3258	21.7098	23.1577	22.6137	23.9641	23.1109	25.1792	23.2826	23.9433	23.0506	NaN				6	6	6	26.7	26.7	26.7	45.563	0	42.508	487270000	114
23.7861	24.8782	23.9406	23.6971	22.1338	24.1235	24.1703	23.7889	23.9415	23.9729	23.9249	24.0794	23.9434	23.0977	23.9678	24.3874	24.462	24.1938	23.6509	24.1769	23.6654	24.0365	23.846	23.5525	24.0146	23.0948	24.0215	23.4477	23.6948	23.6882	23.8679	24.1464	23.9129	23.9217	23.9336	24.1162				6	6	5	20.7	20.7	18	57.81	0	129.41	699840000	145
22.8548	21.94	24.1103	22.3934	22.5873	23.3442	23.7725	22.8931	22.5693	22.9242	22.8308	23.5124	22.6068	23.3116	23.1401	19.4798	NaN	22.8496	23.0008	23.2957	22.8129	23.2646	23.1494	22.0288	22.602	24.5033	22.7201	23.6298	22.6516	23.1643	23.1067	24.0741	22.3854	23.4191	NaN	NaN				10	10	10	20.6	20.6	20.6	86.488	0	11.481	314820000	62
23.8069	24.3342	23.55	23.2163	23.6165	24.1861	24.5276	23.9058	24.2018	23.6625	23.9148	23.483	23.5957	23.1617	22.9138	24.2069	22.8938	22.887	22.9911	23.5792	23.5599	23.0265	23.5883	24.4207	23.2849	22.8059	22.3274	23.1414	23.1341	22.8806	23.7121	23.7551	22.3303	23.5506	24.2555	25.0909				4	4	4	28.9	28.9	28.9	32.444	0	62.834	539060000	117
NaN	20.9604	NaN	NaN	NaN	19.4431	NaN	NaN	NaN	NaN	NaN	NaN	NaN	NaN	NaN	NaN	NaN	22.0942	NaN	NaN	NaN	NaN	NaN	NaN	21.7205	22.4663	NaN	NaN	NaN	NaN	NaN	NaN	NaN	NaN	19.8336	21.9613				4	4	4	3.9	3.9	3.9	134.77	0.0002767	5.2774	30335000	10
NaN	21.2271	25.6849	NaN	NaN	24.2186	24.0818	24.0412	NaN	22.7693	23.614	24.2061	24.3086	24.9679	26.304	NaN	24.7006	NaN	NaN	26.3271	22.505	23.6513	22.7149	21.4865	22.8651	NaN	24.9872	25.8792	21.8651	25.9855	25.7573	21.3238	25.2249	23.977	21.6577	NaN				11	11	11	32.7	32.7	32.7	66.049	0	50.286	860370000	97
26.3132	27.2043	27.3959	27.1161	27.0768	26.6536	26.9575	26.6611	26.4582	27.0494	26.6074	27.2182	26.8945	26.7057	27.0907	27.1968	27.1723	26.986	27.0359	27.3844	26.9352	26.8422	27.2454	27.2575	27.1826	27.2567	27.4118	26.6438	26.9165	26.8086	26.4724	27.3403	26.4587	26.7457	26.9609	27.4107				14	13	4	31.9	30.2	12.4	73.243	0	323.31	5596300000	365
25.3637	26.6858	24.8411	24.4083	24.4881	23.9962	24.839	24.1841	24.4447	23.3106	23.9996	23.7902	24.8436	24.2536	NaN	21.5666	23.1563	25.4016	24.7535	23.1049	23.479	23.7068	24.1452	24.7366	24.094	23.1343	19.5547	25.5572	25.1803	23.0161	NaN	24.3498	NaN	23.6545	24.495	24.074				4	4	4	18.4	18.4	18.4	29.48	0	30.285	886220000	55
20.7304	23.5316	NaN	NaN	21.211	21.2613	NaN	NaN	NaN	21.2481	NaN	NaN	NaN	NaN	22.4417	NaN	20.9303	NaN	22.645	22.3662	20.514	NaN	NaN	NaN	21.0385	NaN	NaN	22.4611	NaN	22.4114	21.9429	22.1369	NaN	NaN	NaN	NaN				2	2	2	13.4	13.4	13.4	14.646	0.00026752	4.5599	82340000	16
24.3733	24.2445	19.4224	23.4139	24.2469	23.456	24.7571	24.6412	24.6353	24.3361	24.2489	24.3141	24.5042	25.0154	24.0324	25.1655	23.606	24.3917	23.8334	23.556	23.8203	23.0415	24.9165	24.8503	23.5309	23.383	24.5138	23.8226	24.4164	24.0202	23.9041	24.0771	24.1784	23.9302	25.0249	24.3549				6	5	5	29.4	26.7	26.7	57.886	0	323.31	815850000	80
24.6006	24.9001	25.2485	25.1967	25.5091	24.2961	24.7538	24.9506	24.7776	25.418	24.4935	25.3006	24.4649	23.4244	24.8768	24.1936	23.1889	24.8395	25.3937	24.7613	24.6126	25.0257	25.2212	24.5955	24.9693	25.2345	24.1812	24.8744	25.4731	24.7697	24.1408	25.3227	24.5387	25.328	24.7205	24.9022				9	9	9	40.9	40.9	40.9	38.946	0	246.64	1275300000	196
NaN	NaN	21.1957	NaN	NaN	NaN	NaN	NaN	NaN	NaN	NaN	NaN	NaN	NaN	20.7278	NaN	NaN	NaN	19.8704	NaN	NaN	19.988	NaN	NaN	NaN	NaN	NaN	NaN	NaN	NaN	NaN	NaN	NaN	NaN	NaN	NaN				3	3	3	2.5	2.5	2.5	184.77	0.00050277	3.4651	9923200	5
28.5012	28.0246	27.1636	28.6329	28.7289	27.0282	27.8553	27.0145	27.8553	27.2238	27.8127	27.1738	27.4901	27.5015	25.9112	28.1345	27.186	27.6925	27.6752	26.3096	27.9797	27.381	27.4491	27.8719	27.6623	26.8606	26.1994	27.506	27.4006	26.683	26.2456	27.6042	27.1761	27.6002	27.7454	28.0161				18	18	18	27.8	27.8	27.8	113.61	0	323.31	8424300000	484
26.7894	26.627	25.8084	25.75	26.1614	26.8178	26.7281	26.4377	26.5482	25.6056	26.6849	26.2487	26.1411	26.5593	25.694	26.6581	26.9535	26.139	25.9877	25.4807	27.304	26.0535	25.6938	25.7835	25.9727	25.9125	25.7527	25.7302	26.6041	25.3691	25.4619	26.3058	26.0758	26.3487	27.1497	25.6424				9	9	9	51.6	51.6	51.6	35.102	0	323.31	3507500000	258
24.0905	23.194	22.9047	22.423	23.3099	22.4264	22.4291	NaN	22.8319	23.1176	23.2928	22.9173	22.7679	NaN	22.951	NaN	20.4537	24.087	23.3913	23.2967	21.5096	22.618	23.3878	NaN	23.0796	22.6721	NaN	22.7476	23.7605	23.4716	23.9516	23.4649	NaN	23.6238	21.9702	NaN				5	5	4	4	4	3.1	218.33	0	32.021	321370000	51
NaN	NaN	NaN	NaN	NaN	NaN	NaN	NaN	23.6611	22.8223	22.6664	22.8782	21.2144	23.3177	NaN	23.2	22.9526	NaN	NaN	NaN	NaN	NaN	NaN	NaN	NaN	NaN	NaN	21.2226	NaN	22.5234	23.4456	19.9062	22.6385	NaN	22.0149	NaN				4	4	4	11.9	11.9	11.9	45.997	0	5.449	129720000	16
NaN	NaN	21.5549	NaN	NaN	NaN	NaN	NaN	NaN	NaN	NaN	NaN	NaN	NaN	NaN	NaN	NaN	NaN	21.6474	NaN	NaN	NaN	NaN	NaN	NaN	22.2765	NaN	21.5844	NaN	NaN	NaN	NaN	NaN	NaN	20.7208	20.8314				2	2	2	3.8	3.8	3.8	91.012	0.0021147	2.6549	12355000	7
NaN	NaN	NaN	NaN	NaN	NaN	23.3434	NaN	22.6406	21.6959	22.4025	21.8362	NaN	NaN	NaN	NaN	NaN	NaN	NaN	NaN	NaN	NaN	22.6202	NaN	21.7519	21.3289	21.966	22.1599	22.2818	21.4799	22.0408	21.2215	21.7705	NaN	23.1459	NaN				2	2	2	5.1	5.1	5.1	61.877	0.00026254	4.1661	80106000	9
24.7087	26.4667	30.2523	27.2079	26.2936	27.1759	25.3001	23.4522	28.3305	25.5027	26.9814	26.0524	25.7949	28.4505	25.7829	28.3967	27.6339	27.1829	25.0408	22.4561	27.9344	27.4347	23.1797	NaN	27.169	26.7199	25.213	26.4883	26.0667	25.7962	25.3076	24.9357	27.9216	25.909	24.8065	25.8077				6	6	6	71.9	71.9	71.9	17.135	0	70.285	6240900000	247
22.8547	NaN	NaN	NaN	NaN	21.1926	NaN	21.8701	NaN	NaN	21.2933	20.848	NaN	NaN	NaN	NaN	NaN	NaN	NaN	NaN	NaN	NaN	21.8697	22.6013	NaN	19.8135	20.5858	21.6032	22.2379	NaN	NaN	NaN	21.2099	NaN	22.1733	21.38				2	2	2	9.6	9.6	9.6	17.417	0.00026925	4.6587	62586000	12
26.0249	25.5846	26.1731	26.3347	25.8575	26.3051	25.6229	25.9832	26.4899	26.1307	26.4283	26.0087	26.3327	25.9852	25.8918	25.3486	26.1085	24.3047	26.3175	26.0277	26.5361	25.9938	25.8973	25.8855	25.9453	25.8233	26.4804	25.7531	26.0081	25.9861	25.9009	25.8026	26.4818	25.7252	26.5214	26.4601				12	12	12	62	62	62	34.482	0	261.2	2784200000	190
22.5149	22.0908	22.3105	22.0428	22.0323	21.7404	NaN	21.7115	21.6729	NaN	21.6632	NaN	22.1678	NaN	21.7192	21.3986	21.9365	22.0789	22.2167	21.4219	23.6048	22.6265	21.5562	NaN	22.2698	22.5127	NaN	22.4137	22.5766	21.6419	NaN	22.4827	21.5218	21.752	21.2808	22.4903				4	4	4	25.4	25.4	25.4	28.102	0	37.339	146730000	30
22.5603	23.4841	22.56	21.7014	22.6656	22.6538	22.3584	23.488	22.9854	22.9065	22.3769	22.2708	23.1616	22.1028	22.8908	23.3672	24.342	21.2847	22.4082	23.6135	NaN	23.0525	22.5372	23.3542	23.0771	21.7432	22.1886	23.2647	22.7509	21.9259	21.6734	22.9889	22.2857	21.7414	23.8298	22.637				4	4	4	48.6	48.6	48.6	16.442	0	51.185	341400000	114
NaN	NaN	23.343	NaN	NaN	23.872	23.7648	23.6392	23.1465	23.3112	23.5631	23.4963	23.0685	NaN	23.8595	22.5217	22.5529	22.0953	NaN	23.89	23.777	NaN	NaN	NaN	NaN	NaN	24.1077	22.8562	23.0016	23.8601	23.6849	23.1202	23.8038	23.6356	NaN	NaN				9	9	9	16.5	16.5	16.5	114.71	0	43.414	320720000	28
26.2913	26.3923	25.2925	25.8396	25.4772	24.1843	25.2523	25.9874	24.442	25.7259	24.7782	24.292	25.2816	24.8506	25.5341	25.4922	24.8431	25.6245	25.988	25.0354	24.7174	25.3076	25.8068	26.0747	25.5551	25.9867	24.523	25.6914	26.3245	25.5167	25.2785	26.0686	25.2061	25.5341	24.9115	25.3219				4	4	4	20.4	20.4	20.4	29.04	0	89.353	1948400000	120
NaN	20.262	21.6675	20.9662	21.5257	21.3149	21.4327	21.8814	NaN	21.6693	21.4368	NaN	NaN	22.7258	NaN	21.2324	NaN	21.0137	20.4248	21.8595	21.5243	21.2365	NaN	NaN	21.188	20.779	22.4271	21.3324	NaN	21.9056	21.5555	NaN	NaN	NaN	21.1149	21.0297				3	3	3	10.8	10.8	10.8	37.808	0	12.923	81529000	32
NaN	21.4155	21.557	20.865	22.2293	21.6559	21.6954	NaN	NaN	20.1382	NaN	NaN	NaN	NaN	20.6867	NaN	21.5549	20.8959	20.4785	20.6045	NaN	21.1157	21.0822	20.908	20.9211	21.5679	NaN	22.2559	NaN	NaN	NaN	20.821	NaN	20.8615	21.0791	NaN				2	2	2	24.3	24.3	24.3	13.018	0.00027056	4.7708	61256000	29
NaN	NaN	NaN	21.5697	NaN	22.3494	22.2971	NaN	22.0919	22.4252	22.489	22.181	22.9368	NaN	22.1122	NaN	NaN	22.4873	22.069	NaN	NaN	21.3757	21.5729	22.0734	22.0167	22.5143	NaN	21.4965	21.6017	NaN	22.7344	NaN	22.1926	NaN	NaN	21.8191				2	2	2	3.9	3.9	3.9	84.141	0	21.425	108540000	26
20.9585	NaN	NaN	NaN	NaN	20.8084	NaN	NaN	NaN	19.9154	20.0029	20.3388	21.1684	20.8065	NaN	NaN	19.6673	19.9303	NaN	20.3809	20.885	NaN	NaN	NaN	20.9248	20.9838	20.3625	20.8933	21.1814	NaN	NaN	21.0213	NaN	20.598	NaN	22.4784				2	2	2	2.7	2.7	2.7	135.98	0.00026947	4.6659	38471000	11
NaN	NaN	22.145	NaN	NaN	NaN	NaN	21.4082	NaN	NaN	NaN	NaN	NaN	NaN	22.1444	23.1495	NaN	NaN	NaN	21.9928	21.3415	NaN	NaN	NaN	NaN	NaN	22.6356	22.0159	NaN	22.9776	22.7367	NaN	22.6696	21.8161	NaN	NaN				2	2	2	14.3	14.3	14.3	18.624	0.0053619	2.2509	83251000	16
25.9527	25.2923	26.0976	25.7129	25.0062	25.437	25.9445	25.2503	25.7742	25.4223	25.6014	25.6986	25.1077	25.2432	24.7737	25.4377	24.6863	26.2777	25.7422	24.6364	25.0469	24.7525	26.155	25.3672	25.0744	26.0136	24.9759	25.9991	26.4723	24.8773	25.1722	25.6435	25.1363	25.4319	25.8039	25.9211				5	5	5	45.6	45.6	45.6	14.285	0	231.34	2202300000	200
23.4569	23.1275	24.3752	21.7872	23.9132	24.357	23.3047	23.0571	23.848	23.502	22.4517	23.7428	24.0763	23.1377	23.1531	NaN	23.6608	23.5285	NaN	23.0452	23.6287	23.5938	24.0454	21.1521	22.5836	23.0208	23.004	22.8122	23.0867	23.511	23.1264	23.0099	22.6444	22.9665	22.2344	23.3446				9	9	9	25.3	25.3	25.3	72.683	0	21.2	352660000	71
28.2413	27.6793	26.8292	27.8301	27.6412	25.3593	27.2257	27.6156	25.7708	27.6521	26.5986	27.7238	26.0493	26.3995	26.6917	26.672	25.7644	28.069	27.91	26.2428	26.7742	28.1982	27.8463	27.887	27.9047	28.2179	25.7171	27.6738	28.1498	27.3099	27.1296	27.7682	26.1149	27.8886	NaN	25.9484				6	6	6	22.1	22.1	22.1	38.868	0	38.002	6752700000	122
29.7517	28.0879	28.1782	28.7042	29.2069	29.189	29.8297	29.0375	29.828	28.6972	28.9833	28.6935	29.801	28.5773	28.1556	28.7611	28.4536	29.1089	29.2472	28.1914	29.4933	28.7743	29.4056	29.1598	28.6742	29.534	27.9269	29.1931	29.7876	28.1535	27.4716	28.9405	28.3089	28.753	28.5602	28.7442				7	7	7	45.6	45.6	45.6	34.463	0	323.31	22185000000	414
22.825	NaN	23.7995	22.9983	22.8884	23.3732	22.4401	22.4272	NaN	22.882	22.5926	23.0654	NaN	NaN	NaN	22.2871	22.9479	NaN	23.2367	24.1302	NaN	22.9878	22.962	NaN	23.5197	22.9173	23.7392	23.3631	21.8238	23.6221	24.0746	23.4188	22.6558	23.1484	22.5714	22.155				7	7	7	8.9	8.9	8.9	121.69	0	115.13	295050000	61
NaN	NaN	NaN	22.8387	NaN	NaN	21.7318	NaN	NaN	21.5627	NaN	22.1636	NaN	NaN	NaN	NaN	NaN	NaN	NaN	20.8258	NaN	NaN	NaN	22.9237	NaN	NaN	21.714	22.5566	NaN	22.35	22.2609	21.8626	21.9644	NaN	NaN	NaN				10	5	5	16.6	11.2	11.2	100.41	0.00025826	3.9129	69185000	15
29.1592	28.9499	27.9869	28.277	28.3352	28.0461	27.7502	28.8173	27.7856	28.1654	27.9237	28.0745	28.4736	27.5842	27.8931	27.6271	27.6758	28.93	28.5387	28.4849	27.5806	28.28	28.6353	27.984	28.4257	28.317	27.7319	28.127	28.5774	27.6322	28.0072	28.4648	27.7997	28.3439	28.5266	28.2851				9	9	9	48.4	48.4	48.4	27.887	0	323.31	13128000000	523
23.6872	24.4197	25.1684	24.7483	25.0018	23.7405	24.3195	24.2343	23.0983	24.0133	23.8114	24.1327	23.8284	24.5073	23.9474	23.9976	23.6514	24.4223	25.315	24.4837	23.8703	23.7842	24.1061	24.0789	24.4198	24.5983	24.4538	24.5763	23.5909	23.7898	24.241	24.7852	24.0516	24.737	23.6416	24.3907				4	4	4	24.2	24.2	24.2	38.287	0	102.88	844610000	100
NaN	NaN	20.8884	20.5523	NaN	20.4476	NaN	NaN	NaN	NaN	NaN	NaN	NaN	NaN	NaN	21.2243	NaN	20.8443	20.963	NaN	NaN	20.3107	NaN	NaN	NaN	NaN	NaN	NaN	NaN	NaN	NaN	NaN	NaN	NaN	NaN	20.8737				5	5	5	9.6	9.6	9.6	137.46	0.00027601	5.222	27778000	4
NaN	NaN	NaN	NaN	NaN	23.5767	NaN	NaN	NaN	NaN	NaN	NaN	NaN	NaN	NaN	NaN	NaN	21.33	NaN	NaN	NaN	NaN	NaN	NaN	NaN	NaN	NaN	NaN	NaN	NaN	NaN	NaN	NaN	NaN	23.2506	21.6001				3	3	3	12	12	12	55.984	0	39.31	28279000	6
NaN	21.9576	22.6492	NaN	NaN	NaN	NaN	NaN	21.0355	NaN	21.5232	21.2233	21.0282	NaN	22.4312	22.5175	23.1006	NaN	NaN	23.1392	NaN	21.4333	NaN	NaN	NaN	NaN	22.6673	22.0975	NaN	NaN	22.7656	NaN	NaN	NaN	22.6089	NaN				2	2	2	17.8	17.8	17.8	16.516	0	45.324	90733000	10
26.1101	26.1677	25.5404	26.7099	26.2437	25.6476	25.1027	24.4681	26.5587	25.6495	25.2848	25.0314	24.9729	26.3018	24.0654	25.3534	25.944	26.3915	26.4233	23.8153	26.6824	25.2629	25.5407	25.4169	25.9172	25.0769	25.1888	25.4467	25.5443	24.7299	24.5138	25.3948	26.0259	25.5084	25.2435	25.4908				2	2	2	25	25	25	13.735	0	89.222	2128200000	78
21.6869	21.2687	NaN	NaN	22.1278	NaN	NaN	NaN	21.5483	22.1356	NaN	21.3384	NaN	22.2915	22.1979	NaN	20.8574	20.226	NaN	21.9966	NaN	21.6856	23.2063	NaN	21.6316	NaN	21.9321	21.4247	21.8776	21.7016	NaN	NaN	22.2355	21.9034	NaN	NaN				4	4	4	25.8	25.8	25.8	26.071	0	39.568	84690000	16
22.6179	23.8204	23.0376	21.5044	24.0039	22.257	21.8114	22.9293	22.8857	22.6281	22.3348	24.3122	21.8777	22.0016	22.2473	25.3406	21.2267	22.5352	22.8634	22.9408	23.8049	24.1946	22.6284	23.1943	23.0242	23.9531	22.6922	22.6713	23.2412	22.3727	22.459	22.8231	22.4503	24.2551	22.5088	NaN				5	5	3	9.9	9.9	6.3	86.563	0	323.31	412940000	61
NaN	23.3523	23.9353	24.1269	23.1245	23.5406	23.6975	23.2118	NaN	24.1862	23.0987	24.024	23.5885	23.455	23.2343	NaN	21.8753	23.4442	23.1004	23.0275	23.1925	22.8755	24.0079	23.5298	23.7766	NaN	23.695	23.5148	23.8581	23.5156	23.3868	24.1724	23.5439	23.9834	23.981	23.5544				4	4	4	13.6	13.6	13.6	49.512	0	247.47	469070000	72
25.044	25.4616	24.321	24.6286	24.2996	25.5712	25.0213	25.3543	24.1105	23.34	24.1136	23.8733	25.0995	22.4529	22.8948	26.3646	25.4595	25.4574	24.2042	24.4918	24.0894	24.5679	24.4435	25.8515	24.1761	24.8337	23.2427	23.7798	24.6695	23.5135	22.9255	24.8457	24.0157	23.5036	24.8318	24.6619				6	6	6	51.6	51.6	51.6	17.769	0	174.84	1956500000	176
NaN	NaN	NaN	NaN	NaN	NaN	NaN	NaN	NaN	20.6291	NaN	NaN	NaN	NaN	NaN	NaN	22.0063	NaN	NaN	21.1817	NaN	NaN	NaN	NaN	NaN	NaN	21.697	NaN	NaN	21.8715	NaN	NaN	20.9251	NaN	NaN	NaN				3	3	3	6.4	6.4	6.4	102.11	0.0002656	4.3922	37134000	5
22.3163	NaN	23.2294	NaN	NaN	NaN	NaN	NaN	NaN	NaN	NaN	NaN	NaN	NaN	NaN	NaN	NaN	23.5804	22.8448	22.9534	NaN	23.3117	22.0341	NaN	NaN	NaN	NaN	NaN	22.2349	NaN	NaN	21.737	NaN	NaN	NaN	NaN				2	2	2	41.5	41.5	41.5	9.9062	0	11.217	79092000	12
NaN	NaN	23.3736	NaN	NaN	NaN	NaN	NaN	NaN	NaN	NaN	NaN	NaN	NaN	NaN	NaN	NaN	NaN	NaN	NaN	NaN	NaN	NaN	NaN	NaN	NaN	NaN	NaN	NaN	NaN	NaN	NaN	NaN	NaN	NaN	NaN				2	2	2	12.2	12.2	12.2	38.268	0	26.622	9887600	3
NaN	23.5059	24.9055	24.6181	NaN	NaN	NaN	24.49	NaN	NaN	NaN	NaN	NaN	22.8664	24.2852	NaN	NaN	24.6618	24.0547	24.5208	24.1529	24.1878	NaN	24.6089	NaN	NaN	NaN	24.7324	22.2672	22.7918	NaN	NaN	NaN	23.0593	NaN	21.7842				3	2	2	15.8	10.3	10.3	23.155	0.0055766	2.2406	340150000	13
NaN	NaN	NaN	NaN	20.9299	20.5573	NaN	NaN	20.7102	21.2136	NaN	20.5018	21.054	NaN	20.7716	NaN	NaN	NaN	21.0676	NaN	20.8775	21.183	NaN	NaN	NaN	NaN	20.4229	21.1956	NaN	21.1487	21.0461	21.2252	NaN	NaN	NaN	NaN				3	3	3	15.9	15.9	15.9	29.884	0	6.3042	34823000	18
24.945	25.6304	25.4047	24.8448	23.646	25.135	24.9544	25.6244	24.4237	25.6836	25.0988	24.8749	25.1404	25.1834	25.193	25.484	24.5612	25.0188	24.8809	25.7535	NaN	25.5698	25.2954	25.3677	25.7743	26.5968	25.3407	25.2454	25.3696	25.7206	25.5867	25.4133	25.108	25.4514	24.5872	25.5788				6	6	6	8.9	8.9	8.9	109.1	0	323.31	1551100000	86
24.0635	23.3843	24.1361	23.6737	24.8399	23.3896	23.5331	24.03	23.1374	23.7967	23.4636	24.1462	23.7859	23.2504	24.0202	24.2322	24.5535	23.8971	24.2139	23.9425	24.0887	23.2247	24.1476	24.2955	24.1402	23.9216	23.6351	23.7505	24.3953	23.1962	23.7707	24.199	23.748	24.0904	23.3697	23.7486				9	9	9	14.5	14.5	14.5	134.46	0	205.81	655060000	100
24.6249	25.7567	25.7253	25.6669	25.6398	25.2451	25.3198	25.6684	25.7227	26.1306	25.5196	26.4285	25.3072	25.4788	26.1953	25.8424	25.3216	25.1691	25.4732	26.421	25.7695	24.7384	25.91	25.2821	25.8841	25.4088	26.5685	25.8178	25.4603	26.2419	26.2328	25.6728	25.7917	25.999	25.8969	24.7672				25	25	25	35.4	35.4	35.4	123.38	0	290.33	2458700000	384
NaN	23.2512	20.9313	21.9393	21.8395	20.6191	NaN	NaN	NaN	20.6334	20.1982	20.8819	NaN	NaN	20.5151	NaN	NaN	21.9304	21.1966	22.585	25.2331	20.6959	20.5836	21.0562	21.4319	20.8734	20.0245	20.4076	20.5655	NaN	NaN	20.5515	NaN	NaN	20.8222	21.8368				6	6	6	5.1	5.1	5.1	206.89	0	8.3672	113590000	25
NaN	NaN	25.5946	NaN	NaN	NaN	NaN	NaN	NaN	NaN	NaN	NaN	NaN	NaN	NaN	NaN	NaN	23.7568	NaN	NaN	NaN	NaN	NaN	NaN	NaN	NaN	NaN	NaN	NaN	NaN	NaN	NaN	NaN	NaN	NaN	NaN				11	5	5	19.2	7.8	7.8	95.198	0	122.54	65900000	6
22.8514	22.2416	22.3834	22.3277	21.8592	NaN	22.5921	NaN	NaN	21.3575	NaN	23.0361	21.9112	22.0189	22.7569	NaN	22.8049	22.332	NaN	23.2327	21.8826	NaN	NaN	21.5689	NaN	NaN	22.8989	23.1854	NaN	23.4127	21.7202	NaN	22.482	21.765	NaN	NaN				5	5	5	5.1	5.1	5.1	247.24	0	20.649	162610000	34
21.0048	NaN	NaN	NaN	NaN	NaN	NaN	22.5873	NaN	22.0268	22.4724	NaN	22.6331	21.8066	NaN	NaN	NaN	21.8482	NaN	21.9242	22.8599	NaN	NaN	NaN	NaN	NaN	22.8256	22.0182	NaN	NaN	NaN	21.8276	NaN	21.6325	NaN	NaN				9	9	9	9.3	9.3	9.3	205.12	0	153.58	154310000	19
NaN	21.2659	22.0572	21.4439	NaN	21.3606	21.5475	NaN	20.9509	20.868	NaN	20.8593	21.176	20.5327	NaN	NaN	20.4715	20.3602	21.8998	21.0248	NaN	21.3639	21.2808	21.5569	21.4763	21.5843	21.4211	20.5992	20.4821	21.4025	21.524	21.237	21.4103	NaN	21.0139	21.3945				2	2	2	7.4	7.4	7.4	74.533	0	55.371	76635000	32
22.2585	NaN	NaN	NaN	NaN	NaN	NaN	NaN	21.3462	21.2894	NaN	NaN	23.1812	NaN	22.8975	21.1984	NaN	NaN	NaN	22.7381	NaN	NaN	NaN	NaN	NaN	NaN	21.1999	21.112	NaN	NaN	NaN	NaN	NaN	21.3619	NaN	NaN				5	5	5	6.3	6.3	6.3	118.29	0	34.209	42392000	12
NaN	NaN	22.4863	23.1092	NaN	22.0894	NaN	20.9774	NaN	NaN	NaN	NaN	NaN	NaN	NaN	NaN	22.5437	NaN	22.6321	NaN	NaN	22.4839	NaN	22.5525	22.2531	NaN	NaN	23.1967	NaN	22.0221	22.7527	23.3611	NaN	NaN	NaN	NaN				2	2	2	1.7	1.7	1.7	186.03	0.0040946	2.4254	97703000	15
25.5215	25.6128	25.6324	25.742	25.7464	26.0121	25.1405	24.5337	24.4656	25.852	24.6916	25.4242	23.2631	24.9983	26.0315	25.6376	25.4362	25.2302	25.8322	25.6362	25.4708	26.3259	26.0539	25.4125	25.6913	26.1753	25.2747	25.2498	25.4658	25.4939	24.781	25.7405	24.523	25.9968	24.2127	25.9196				21	21	21	30.2	30.2	30.2	144.73	0	323.31	1885500000	213
21.2118	NaN	19.1425	NaN	NaN	NaN	NaN	NaN	20.7501	NaN	20.1395	NaN	21.0772	20.2131	19.525	NaN	NaN	20.1132	20.0522	18.2815	NaN	NaN	19.9172	NaN	19.8894	21.7787	NaN	20.6769	20.6823	NaN	NaN	20.1058	19.5101	18.9781	21.0767	19.4541				2	2	2	1.9	1.9	1.9	161.1	0	29.383	33677000	25
NaN	23.8945	20.2594	NaN	21.4328	20.9874	20.7656	NaN	NaN	NaN	20.5975	NaN	20.6685	21.1991	20.9706	23.3077	24.8319	20.9528	NaN	20.9581	NaN	20.7306	NaN	NaN	21.2064	NaN	NaN	NaN	NaN	21.1222	20.8861	NaN	NaN	19.8187	20.2305	20.8541				2	2	2	3.3	3.3	3.3	81.099	0	66.925	161470000	35
25.0911	24.6433	24.2742	23.9984	25.3189	24.3782	24.5471	24.4312	24.1884	24.2263	24.3945	23.9948	24.8917	NaN	23.7971	NaN	25.5653	25.1642	24.8921	23.5018	NaN	20.661	24.5358	24.8608	23.8422	23.9895	23.5588	24.4287	24.8805	23.3378	23.4967	25.0888	NaN	24.7922	23.7225	24.5898				3	3	3	31.6	31.6	31.6	15.179	0.00027093	4.8349	864860000	50
NaN	NaN	NaN	NaN	24.6517	NaN	23.1384	NaN	NaN	24.1876	NaN	24.0109	23.5525	NaN	23.7774	23.2316	NaN	NaN	23.4442	23.7791	23.0846	23.6262	NaN	NaN	23.4158	24.1736	23.8315	22.7591	24.4807	23.8033	23.8999	24.0447	23.198	NaN	NaN	NaN				4	4	4	10.3	10.3	10.3	85.386	0	27.409	351180000	31
26.5898	26.7722	26.4355	26.397	26.5186	25.9206	26.277	27.6162	25.8033	27.3135	25.7683	27.2153	26.8158	26.2698	27.5817	26.0222	26.045	27.0848	25.2419	26.6911	26.5568	27.1399	27.1851	26.9986	26.6167	26.961	26.7265	27.1592	26.7424	26.7657	26.8588	27.1374	26.2921	27.3421	26.4937	25.0872				8	8	7	33.1	33.1	26.9	40.949	0	323.31	4525000000	151
30.6542	29.5242	30.2636	29.7119	29.3046	29.3845	29.4711	30.3254	29.4932	29.915	29.1138	29.6364	29.9602	28.8103	30.3543	28.8891	28.075	29.7498	30.2817	29.9373	29.0518	30.0259	30.2562	29.5834	29.4092	29.7977	29.0586	29.9964	30.0146	29.5188	29.834	29.836	28.7826	30.0839	28.6046	28.6736				9	9	9	36	36	36	34.333	0	323.31	34790000000	292
27.2852	26.955	27.4774	27.2772	26.7124	26.5674	26.4813	26.7372	26.117	26.727	26.3746	26.8837	27.0012	25.447	26.6409	25.3312	26.1115	27.0729	27.5432	26.7882	26.4546	26.6994	26.8099	27.2856	26.5926	26.6366	26.0952	26.8195	26.1995	26.0924	26.1208	27.1408	26.1211	26.4139	26.4361	26.0238				3	3	3	15.2	15.2	15.2	20.546	0	154.16	5735800000	219
23.8665	27.241	23.7295	23.663	23.8456	23.6438	23.8367	22.9339	23.2594	23.7957	23.75	23.0373	23.4107	22.5402	23.9315	23.2548	25.123	23.2258	24.0272	23.4414	23.2037	24.1762	24.3735	23.6267	24.1982	24.2922	23.1787	23.3332	23.835	23.1686	23.2821	24.1512	23.1763	23.4685	23.4211	23.892				5	5	5	20.5	20.5	20.5	38.646	0	59.048	767560000	86
23.794	25.3411	23.4603	23.6132	23.9106	24.1077	24.5123	24.6852	24.221	23.4404	23.9935	23.7897	24.5342	NaN	NaN	23.4726	24.5374	24.2961	23.5069	23.668	25.5044	22.9452	23.0246	23.6205	22.5573	22.408	23.4098	NaN	23.3644	22.9794	23.249	23.1987	23.5211	22.0147	24.1213	24.0205				2	2	2	15.6	15.6	15.6	26.825	0	35.173	629590000	69
25.8099	25.4107	25.7087	25.7813	25.8183	25.9009	26.2869	NaN	25.9701	25.5595	25.9703	25.493	25.6939	26.1227	25.957	25.2099	25.48	26.4222	25.4153	25.3057	25.6187	25.272	25.1372	25.2797	25.4692	25.0436	25.2371	24.5624	25.1168	25.649	23.9326	25.5852	25.5608	25.6276	25.3775	25.0576				3	3	3	18.4	18.4	18.4	23.818	0	180.37	2125700000	105
25.1786	25.425	25.3827	25.8116	25.0328	25.1545	25.461	25.0518	24.6694	24.7316	24.7718	25.0373	24.9143	24.3203	24.3464	23.9147	24.7166	25.7643	25.2668	24.2109	25.0524	25.6851	24.7767	25.1907	24.6427	25.135	23.987	25.2006	25.1589	24.4377	24.715	25.4953	24.3596	25.2869	24.808	25.323				5	5	5	42.6	42.6	42.6	14.582	0	300.89	1313900000	65
20.7312	NaN	21.9887	NaN	NaN	24.7033	24.5416	NaN	21.7663	24.0261	23.9482	23.2341	23.1516	24.1708	26.7609	25.0011	24.2732	22.3439	NaN	23.393	23.4439	23.051	NaN	23.5359	21.8225	NaN	23.1872	23.8012	20.4207	25.2952	25.7662	20.8635	23.8414	22.6981	NaN	NaN				23	23	22	11.7	11.7	11.3	399.73	0	124.29	632250000	134
25.042	25.8365	25.6724	25.5966	26.1272	26.4917	26.2387	25.6681	25.264	25.7495	26.2261	26.0599	25.6797	23.6362	25.1979	26.542	25.7712	26.3694	25.6096	25.578	25.6388	25.7693	25.2373	26.0071	25.6142	24.8046	25.6238	25.6127	25.4306	25.5662	25.5636	25.1599	25.2799	25.5606	26.2535	26.1079				13	13	12	61.5	61.5	58.3	28.356	0	59.778	2285800000	169
NaN	NaN	22.8865	NaN	22.4734	22.8015	21.9913	NaN	21.0589	NaN	NaN	NaN	NaN	21.5439	20.9613	NaN	19.9196	NaN	NaN	22.0215	NaN	NaN	NaN	NaN	NaN	NaN	NaN	22.1196	21.0863	20.8589	NaN	NaN	NaN	22.0423	NaN	NaN				4	4	4	9.1	9.1	9.1	69.574	0.0043006	2.3845	54683000	14
NaN	NaN	NaN	NaN	NaN	NaN	NaN	21.4878	NaN	21.334	NaN	NaN	NaN	NaN	NaN	NaN	21.0219	NaN	NaN	20.8486	NaN	NaN	NaN	NaN	NaN	NaN	22.269	21.7168	21.3037	NaN	NaN	NaN	21.7053	NaN	NaN	NaN				2	2	2	14.8	14.8	14.8	22.958	0.00051151	3.7398	29076000	13
NaN	NaN	NaN	NaN	NaN	NaN	NaN	NaN	NaN	NaN	NaN	NaN	NaN	NaN	NaN	NaN	22.5616	NaN	NaN	NaN	NaN	NaN	NaN	NaN	NaN	NaN	NaN	NaN	NaN	NaN	NaN	NaN	NaN	NaN	NaN	NaN				2	2	2	4.4	4.4	4.4	69.908	0.0095704	1.8138	13194000	4
22.4668	NaN	23.2898	23.2021	21.0882	23.1517	22.9446	23.2291	23.5723	23.0024	23.6439	23.0731	22.3229	23.6021	22.9466	24.9185	25.5752	21.8274	NaN	24.3669	25.2223	22.889	22.8579	NaN	22.7011	22.6288	24.927	22.9491	22.0938	24.0405	24.1825	21.4824	24.2985	22.8395	23.6224	23.6813				5	5	5	24.5	24.5	24.5	30.394	0	183.84	643090000	91
NaN	NaN	21.9836	21.035	21.0226	21.954	22.1535	21.2391	NaN	NaN	21.5963	NaN	21.178	NaN	NaN	21.7498	22.2636	21.6664	NaN	22.5406	NaN	21.2974	NaN	21.6459	21.6203	21.5969	21.69	21.2626	NaN	NaN	21.189	NaN	21.7879	NaN	21.3068	21.531				4	4	4	10.1	10.1	10.1	62.924	0.00027352	5.0082	77814000	26
NaN	NaN	24.4106	NaN	NaN	NaN	NaN	NaN	NaN	NaN	NaN	NaN	NaN	NaN	NaN	NaN	NaN	NaN	NaN	NaN	NaN	NaN	NaN	NaN	NaN	NaN	NaN	NaN	NaN	NaN	NaN	NaN	NaN	NaN	NaN	NaN				2	2	2	16.2	16.2	16.2	19.051	0.0079724	1.9358	20290000	3
25.5853	NaN	NaN	NaN	NaN	26.9054	27.1036	24.7927	20.9253	NaN	22.0345	21.1263	NaN	NaN	NaN	19.3723	20.806	22.9762	NaN	25.7077	NaN	21.3855	24.9714	NaN	22.1212	23.0271	NaN	21.435	25.2059	NaN	NaN	24.1036	NaN	21.8115	21.5602	NaN				10	10	10	24.6	24.6	24.6	69.135	0	67.106	571920000	61
23.2981	NaN	23.5355	24.014	23.9038	NaN	NaN	21.422	23.149	23.1907	23.1575	23.3426	23.042	23.3081	23.5836	22.0189	22.7196	22.5541	23.6942	23.3361	23.7753	23.4968	23.3391	23.1078	23.2603	NaN	NaN	23.4549	23.0493	23.4334	NaN	23.9318	23.8111	NaN	23.1458	23.4109				2	2	2	26.1	26.1	26.1	13.428	0	10.788	357650000	31
24.0036	23.0057	22.8029	23.9367	22.8858	NaN	23.4243	23.5564	NaN	24.1368	23.3977	23.7799	23.7321	23.0062	22.1165	23.6136	22.5484	23.5017	NaN	22.5448	24.0125	23.5536	25.0264	23.7116	23.0236	22.9745	22.5202	NaN	23.4875	22.9347	23.2369	23.6387	23.374	21.8045	23.735	24.4057				4	4	4	13.2	13.2	13.2	59.271	0	41.278	414310000	54
NaN	21.3052	NaN	NaN	NaN	NaN	NaN	22.1423	NaN	NaN	NaN	NaN	NaN	NaN	NaN	NaN	21.4943	22.4415	22.4031	NaN	NaN	NaN	NaN	NaN	NaN	NaN	NaN	NaN	NaN	NaN	NaN	NaN	NaN	NaN	NaN	22.8017				5	4	4	5.2	4.2	4.2	138.6	0.00026069	4.0687	46973000	9
23.799	24.3471	24.3573	25.3385	24.4132	23.8017	24.2468	24.1321	22.9407	24.5009	23.4477	23.8889	23.9114	23.0794	23.9535	21.4778	23.6929	23.3733	24.9639	24.7658	24.285	23.9829	23.8068	24.2592	24.6869	24.9201	23.9286	23.5128	23.9316	23.7322	24.0782	24.4643	23.7482	23.4569	24.0357	24.732				8	8	8	30.3	30.3	30.3	58.14	0	41.923	724960000	137
22.1909	21.9212	21.2161	21.972	NaN	21.0372	NaN	21.7749	21.4551	21.8142	22.1511	21.6167	NaN	NaN	22.4389	NaN	23.0085	22.1814	23.3033	22.7982	19.8117	21.6623	NaN	21.7685	22.6097	21.7099	22.1015	22.0295	NaN	21.9083	21.2287	21.6082	21.9246	22.3476	22.8239	21.4841				4	4	4	22.2	22.2	22.2	39.93	0	14.462	138740000	60
NaN	NaN	21.8137	NaN	NaN	NaN	NaN	NaN	NaN	22.0492	NaN	NaN	21.3137	NaN	22.8593	21.0943	NaN	NaN	NaN	22.4731	20.265	21.171	NaN	NaN	NaN	NaN	21.9548	22.2142	NaN	22.5376	22.3437	NaN	21.5367	NaN	22.2334	NaN				4	4	4	20	20	20	33.776	0	17.224	82829000	20
26.5158	27.2397	27.0622	27.0802	27.5928	26.6659	26.9797	26.9877	26.9489	26.9914	26.6037	26.5228	27.0614	26.2148	26.87	26.5102	26.3804	26.9958	27.576	27.0338	27.2128	27.1538	26.9526	27.1302	27.3291	27.8627	26.803	27.0879	26.7918	26.8517	26.5227	27.5787	26.9083	26.7108	26.231	26.4987				6	6	6	41	41	41	27.4	0	323.31	5392100000	287
NaN	NaN	NaN	NaN	NaN	NaN	NaN	NaN	23.9367	23.2775	NaN	NaN	NaN	24.6399	NaN	NaN	23.5702	NaN	NaN	NaN	23.678	NaN	NaN	NaN	NaN	NaN	25.12	NaN	22.0785	22.7273	22.7013	NaN	23.9644	NaN	23.1404	NaN				7	7	7	23.5	23.5	23.5	60.632	0	45.991	195760000	33
NaN	23.1385	NaN	NaN	NaN	NaN	NaN	NaN	NaN	NaN	NaN	NaN	NaN	NaN	NaN	21.3189	NaN	NaN	NaN	24.0279	NaN	NaN	NaN	NaN	21.2667	NaN	NaN	NaN	NaN	NaN	NaN	NaN	NaN	NaN	21.3693	21.5981				3	3	2	5.2	5.2	2.9	39.21	0.00050251	3.4621	61329000	10
22.9654	NaN	23.2768	23.0419	23.2358	22.7541	22.493	23.0106	22.974	22.7883	22.8434	23.7307	22.4663	23.0689	22.9478	21.0751	22.8161	NaN	NaN	23.2506	23.0745	23.3945	23.0831	23.0869	NaN	22.6242	23.6985	22.7123	NaN	24.1993	23.4895	22.7042	23.1243	23.2926	23.226	22.8471				6	6	6	38.9	38.9	38.9	22.417	0	29.654	290890000	49
29.9738	29.3673	28.6861	29.4451	29.3587	28.6567	28.765	29.3849	28.8475	28.5652	28.4015	28.5343	29.1659	28.939	28.6282	27.7754	27.5232	29.8717	29.0878	27.5227	27.2866	29.7689	29.1422	29.333	28.3495	28.2885	27.8394	28.9429	29.1764	27.5717	28.084	29.2346	27.7499	29.3741	27.9272	28.129				6	6	6	58.3	58.3	58.3	16.32	0	226.58	19436000000	138
23.2698	24.132	22.8441	23.8716	NaN	22.8466	23.1574	21.3389	22.7939	23.104	23.006	23.1994	23.1186	22.6511	22.2459	24.1903	24.856	23.4682	23.7302	22.0413	23.0002	23.2087	23.5404	23.6139	23.0812	NaN	22.5515	23.2454	23.9644	22.6341	22.395	23.2918	22.3022	23.1043	24.3031	23.6452				4	4	4	48.6	48.6	48.6	16.311	0	253.83	453540000	76
NaN	NaN	NaN	NaN	NaN	NaN	NaN	NaN	NaN	NaN	NaN	NaN	NaN	NaN	NaN	NaN	NaN	NaN	NaN	22.3577	NaN	NaN	NaN	NaN	21.9565	NaN	NaN	NaN	NaN	NaN	NaN	NaN	NaN	21.9407	NaN	NaN				12	2	2	24.4	4.8	4.8	73.153	0.0057791	2.2003	11477000	4
25.0732	NaN	25.8404	25.3232	24.7921	26.2076	25.6308	26.2382	24.6056	25.1506	24.8349	24.9331	24.6337	23.784	24.9562	24.8	24.0003	25.0628	25.1961	27.2195	24.6167	25.1121	25.5208	25.8176	24.7841	25.3081	24.9075	25.7143	26.3484	25.3785	NaN	23.5716	24.3458	25.2668	25.3252	26.4572				4	4	4	26.2	26.2	26.2	43.885	0	29.309	1860200000	61
25.3953	25.4726	26.5324	25.8865	25.5442	26.2372	25.622	25.7032	25.2139	25.8944	25.2274	26.5156	25.2827	25.0485	26.6155	26.4582	25.9216	25.7905	25.331	26.3368	24.7854	25.9404	25.9972	25.3975	25.8883	25.4322	26.2359	26.1213	26.2368	26.0659	26.325	26.2973	25.5635	25.8207	25.5643	25.8191				20	20	19	36.1	36.1	35	90.932	0	323.31	3023500000	339
21.7025	20.7222	22.8612	22.0548	22.2928	21.9423	NaN	NaN	NaN	22.5125	21.3453	22.7522	NaN	NaN	22.3838	NaN	21.291	21.8744	20.1612	NaN	22.2365	NaN	22.0476	NaN	NaN	22.0731	21.7135	NaN	21.981	22.6824	21.9705	22.6655	21.5623	22.2667	NaN	20.8746				2	2	2	6.1	6.1	6.1	54.843	0	18.497	118200000	23
23.4694	24.8457	NaN	22.0279	23.8457	22.5463	22.9284	23.0603	NaN	NaN	21.9824	22.9037	23.63	NaN	21.8347	24.7204	23.9298	22.721	23.0228	22.708	23.4805	22.5006	21.6919	NaN	22.7568	23.454	21.8185	22.3165	23.0701	23.9443	22.7279	24.7091	23.016	22.4544	22.0941	22.636				9	9	9	5.6	5.6	5.6	331.07	0	128.09	408480000	69
NaN	NaN	NaN	NaN	NaN	NaN	NaN	NaN	NaN	NaN	NaN	NaN	NaN	NaN	NaN	20.016	NaN	NaN	NaN	19.3385	NaN	NaN	NaN	NaN	NaN	NaN	19.1832	NaN	NaN	NaN	NaN	NaN	NaN	NaN	NaN	NaN				3	3	3	4.2	4.2	4.2	122.07	0	5.911	8853300	4
25.9705	25.6499	25.485	25.7809	25.417	25.541	25.2007	25.6904	24.9266	25.7303	25.4172	24.813	25.3287	24.8906	25.5368	25.4806	24.4026	25.847	25.8132	24.9427	25.6011	25.83	26.0995	26.1358	25.6366	25.5167	24.6741	25.7636	25.3915	24.8374	24.2961	25.7379	25.0663	25.0841	25.6288	24.9764				2	2	2	28.7	28.7	28.7	16.694	0	53.377	2313000000	97
22.7395	22.3933	23.7128	23.8751	23.4595	NaN	22.4748	22.7663	NaN	NaN	22.4122	23.0213	22.8282	22.8272	23.1997	22.0912	NaN	23.164	23.1154	23.6168	22.5267	23.4102	23.026	22.683	23.4008	22.9185	22.7124	23.2133	23.2497	23.1408	23.5835	23.4074	22.0973	23.0557	22.3645	NaN				3	3	3	9	9	9	58.32	0	6.4664	295550000	38
24.0489	24.2031	23.2876	25.7537	25.133	25.1865	25.4533	23.0433	NaN	25.973	25.0805	25.9482	24.8663	25.1429	24.8822	24.0269	25.3738	24.9431	23.9388	23.8889	24.7844	25.0011	25.2895	25.5423	24.9056	24.1292	25.1736	24.9823	24.4041	24.3938	24.7495	25.2718	24.3316	25.1193	24.1899	25.2729				8	8	8	19.1	19.1	19.1	56.65	0	261.79	1266200000	143
24.3592	23.552	24.5692	24.5692	23.7712	24.0115	24.0146	NaN	23.5335	23.962	23.8469	23.3766	24.1214	24.2835	24.076	23.8275	NaN	24.0962	24.2316	23.5064	23.5854	23.7775	23.6724	24.4072	22.9863	NaN	24.0686	24.4939	23.8829	23.9201	23.9233	23.9888	23.7541	23.9682	23.5066	22.5395				2	2	2	24	24	24	20.108	0.00074553	3.334	582660000	44
25.6409	25.5404	25.1876	26.3124	25.7146	24.8354	25.4147	25.6553	25.0325	25.6404	25.2019	25.5687	25.1045	23.8322	25.7842	24.9884	25.073	25.6092	25.3722	25.5135	25.48	25.3518	26.0535	25.1684	25.7516	25.7021	25.1603	25.263	26.0106	24.9906	25.3537	25.5681	25.3092	25.4562	25.4425	25.7616				12	12	12	29.4	29.4	29.4	60.977	0	73.284	1955400000	199
NaN	NaN	21.9552	NaN	NaN	22.4909	NaN	NaN	21.854	21.0169	20.4569	22.0592	19.7704	22.412	22.0439	NaN	21.8671	NaN	NaN	22.5844	22.1584	NaN	NaN	NaN	22.6956	NaN	22.8849	21.3971	21.4876	20.8731	20.6887	NaN	24.2213	22.6817	23.4221	NaN				6	5	5	17	14.7	14.7	70.832	0	7.0341	118190000	36
21.684	23.4538	22.8476	22.7151	23.0636	22.156	22.2765	NaN	19.2824	22.0497	22.1252	22.58	22.3303	22.5992	21.9851	23.2024	23.3062	22.4591	22.8322	18.4962	22.4316	22.6748	21.8276	NaN	22.0588	22.1851	22.4253	22.1608	21.6154	22.4005	NaN	22.5139	22.2195	22.5626	21.8798	21.7512				3	3	3	6.2	6.2	6.2	76.806	0	53.058	218970000	70
NaN	NaN	NaN	NaN	NaN	NaN	NaN	NaN	21.2886	NaN	NaN	NaN	NaN	22.5754	20.8769	NaN	20.5564	NaN	NaN	20.5367	NaN	NaN	NaN	NaN	NaN	NaN	NaN	NaN	NaN	NaN	NaN	NaN	NaN	NaN	NaN	20.8448				2	2	2	5.2	5.2	5.2	45.118	0.0095379	1.7913	17491000	14
NaN	NaN	NaN	NaN	NaN	NaN	NaN	20.9794	21.2147	22.0866	NaN	22.9068	22.7166	NaN	22.1643	NaN	NaN	NaN	NaN	21.8176	23.1222	NaN	22.2119	NaN	NaN	NaN	23.5077	22.2096	22.2828	22.8844	22.6228	22.5167	22.4028	NaN	NaN	NaN				4	4	4	8.4	8.4	8.4	90.254	0	10.935	118850000	21
NaN	NaN	NaN	NaN	NaN	NaN	NaN	NaN	NaN	NaN	NaN	NaN	NaN	NaN	NaN	NaN	NaN	NaN	NaN	NaN	NaN	NaN	NaN	NaN	NaN	NaN	NaN	NaN	20.6284	21.514	21.5878	NaN	NaN	21.7109	NaN	NaN				2	2	2	3.9	3.9	3.9	61.097	0.0042822	2.3337	12209000	5
NaN	24.199	21.5606	21.7013	23.057	22.9736	NaN	NaN	23.0437	20.756	22.4231	22.476	NaN	23.423	22.3681	23.438	24.2876	23.0026	21.5632	21.6847	23.9261	NaN	NaN	NaN	22.2361	NaN	24.3481	22.1814	21.0761	22.4773	NaN	22.1614	23.4784	22.1967	NaN	NaN				4	4	4	12.6	12.6	12.6	49.814	0	212.85	352410000	58
NaN	NaN	NaN	NaN	NaN	NaN	NaN	NaN	NaN	20.6223	NaN	NaN	NaN	NaN	21.0179	NaN	NaN	NaN	NaN	21.6877	NaN	NaN	NaN	NaN	NaN	NaN	20.6925	21.6077	NaN	NaN	21.098	21.3289	NaN	NaN	NaN	NaN				3	3	3	5.5	5.5	5.5	88.604	0.0021362	2.7665	26886000	7
NaN	21.3125	NaN	21.5382	NaN	NaN	21.4003	NaN	NaN	NaN	NaN	NaN	NaN	NaN	NaN	NaN	NaN	20.5308	NaN	21.2812	20.9499	NaN	21.1617	20.8031	NaN	NaN	NaN	NaN	NaN	NaN	NaN	NaN	NaN	NaN	NaN	NaN				3	3	3	4	4	4	138.1	0.00074313	3.3051	33418000	7
24.864	24.7406	23.83	24.8666	25.5173	23.6259	24.3108	24.4547	23.4487	23.9848	24.0294	24.0996	24.1123	23.3819	23.669	24.4865	23.9957	24.665	24.8958	23.6764	23.7421	24.5575	24.3229	24.3595	24.0408	24.7069	23.7489	23.9929	24.3641	23.1911	23.6422	24.6335	23.7009	24.082	24.3093	24.489				4	4	4	25.9	25.9	25.9	15.548	0	107.81	816110000	156
NaN	NaN	NaN	NaN	NaN	NaN	NaN	NaN	NaN	NaN	NaN	21.7361	NaN	NaN	NaN	NaN	NaN	NaN	NaN	NaN	NaN	NaN	NaN	NaN	NaN	NaN	22.7998	21.9123	NaN	22.1556	22.7602	NaN	NaN	NaN	NaN	NaN				3	3	3	8.6	8.6	8.6	77.528	0.0057765	2.1985	34298000	4
25.5411	24.9626	23.9869	25.1401	24.6461	25.6761	25.3067	25.0815	25.0848	25.1849	24.7829	24.8731	25.4569	23.5529	25.3491	25.0507	26.3895	25.3517	25.0144	24.6852	24.8057	24.9033	26.0403	25.8091	24.6701	25.0954	24.5754	25.735	25.2703	24.6808	25.1189	25.5191	24.5795	25.2716	25.6728	24.0355				5	5	5	26.3	26.3	26.3	32.251	0	220.58	1610700000	88
28.7765	27.0866	26.6686	28.0669	27.9327	27.302	28.2672	28.2414	27.7791	27.2956	27.8541	27.4146	27.7388	28.094	26.5368	27.9399	26.9438	28.222	27.5134	26.6832	27.1981	27.2057	27.4781	27.3727	27.3274	27.8059	27.0835	27.1242	28.5355	26.7323	27.019	27.8194	27.4266	27.4202	27.2967	28.6841				9	9	9	47.3	47.3	47.3	19.901	0	323.31	10088000000	319
22.415	23.64	21.4887	22.4958	23.1199	21.9542	20.6917	21.9121	22.2818	23.3115	22.1807	22.9747	22.4691	NaN	22.6712	20.8968	22.3448	22.7106	22.8969	23.5862	21.8317	22.7379	22.8086	22.5658	23.3822	23.8119	21.5469	22.4876	23.1149	22.2419	NaN	22.7667	22.2876	22.7897	22.6393	21.3121				6	6	6	26.1	26.1	26.1	41.21	0	83.125	236650000	62
NaN	NaN	21.2745	20.7756	NaN	NaN	NaN	NaN	NaN	NaN	NaN	NaN	NaN	21.4632	20.5599	NaN	NaN	NaN	NaN	NaN	21.0693	20.9232	NaN	NaN	NaN	NaN	NaN	NaN	NaN	NaN	NaN	NaN	NaN	20.8929	20.9068	20.5051				3	3	3	2.7	2.7	2.7	146.87	0.0016933	2.9673	19738000	8
25.8982	25.852	26.6413	26.0235	25.7881	25.7192	25.27	25.4431	25.1373	25.7015	25.2069	25.1931	25.6516	25.67	26.0079	25.0118	24.292	25.8145	26.4287	24.9308	25.802	26.0751	25.6199	26.5558	25.5609	26.2181	25.1201	26.0114	25.5128	25.1717	25.3189	26.0781	25.0751	25.708	24.9599	25.6897				4	4	4	31.1	31.1	31.1	19.208	0	164.26	2034400000	114
NaN	NaN	NaN	NaN	NaN	NaN	NaN	NaN	23.063	NaN	NaN	NaN	NaN	NaN	NaN	NaN	NaN	NaN	NaN	NaN	NaN	NaN	NaN	NaN	NaN	NaN	NaN	NaN	NaN	NaN	NaN	NaN	NaN	NaN	NaN	24.3886				3	3	3	2.3	2.3	2.3	209.85	0	7.2318	17749000	5
23.0159	25.1979	23.8315	23.6772	22.7485	23.8498	23.5696	22.6782	23.4979	22.8509	23.2024	23.3691	23.456	22.8005	23.3104	23.9617	24.2372	23.1975	23.6197	23.4363	24.7067	23.0439	23.097	22.9082	22.8198	22.6095	22.5204	23.2516	22.7147	23.0486	23.1445	23.0156	22.9463	22.4079	23.8824	24.2215				6	6	6	22.9	22.9	22.9	46.381	0	52.299	455940000	73
24.9014	26.2528	26.5642	26.6494	26.4212	25.5732	26.1628	26.0664	25.623	26.2241	25.331	26.2696	26.3055	26.3376	26.1494	25.2754	25.2763	26.265	26.6524	25.2869	25.9016	26.5257	25.748	26.1612	26.0734	25.9497	25.7873	25.8993	26.7054	26.0746	26.1214	26.516	26.0473	26.4264	25.6865	25.6377				5	5	5	18.9	18.9	18.9	39.589	0	315.68	3109900000	155
25.3952	24.8957	25.44	25.2793	25.4957	25.6148	25.3903	24.8095	25.6159	25.427	25.6134	25.2899	25.2515	25.6543	26.2156	25.2422	26.3946	25.8908	25.0786	25.1297	25.5309	25.4377	25.1779	25.5406	25.2476	24.914	26.1871	25.3118	24.4825	25.7963	25.3431	24.6993	25.7452	25.4739	25.9337	26.1612				14	14	14	21.4	21.4	21.4	112.59	0	164.26	2198600000	176
27.9912	26.3186	25.6454	26.8742	27.414	26.5904	27.0115	26.3621	27.0719	25.7667	26.7954	25.6435	26.3566	26.5434	24.4576	26.7596	25.3782	27.1829	26.3662	25.4658	26.8904	26.7883	26.5988	26.6938	26.2736	27.244	25.2645	25.6096	27.5758	25.2024	25.08	26.5763	25.9533	25.7465	27.4549	28.5369				4	4	4	59.3	59.3	59.3	9.6138	0	262.32	4696800000	197
27.5409	27.3734	27.4339	27.8469	27.8053	25.9347	27.0372	27.2543	26.4847	27.4339	26.6911	27.7494	26.6364	25.9416	26.7384	26.9502	25.9145	28.0095	27.6122	27.2636	26.4134	27.6686	27.7806	28.2012	27.5787	27.6456	26.5896	27.4013	28.18	26.4087	26.8962	27.6039	26.7686	27.2854	26.1847	27.1053				8	8	8	32.8	32.8	32.8	51.258	0	238.74	6468900000	150
25.9418	24.4058	NaN	NaN	23.3251	NaN	NaN	23.5678	NaN	24.622	24.1188	24.2535	NaN	NaN	NaN	NaN	NaN	24.2359	24.1431	23.0833	22.866	23.7457	25.1349	24.7199	23.8097	24.4941	NaN	24.0212	25.4254	NaN	NaN	24.6492	NaN	25.0533	NaN	NaN				4	4	4	45.5	45.5	45.5	24.985	0	38.458	447660000	33
22.0987	NaN	23.1721	23.0129	23.9881	21.5735	NaN	NaN	NaN	23.2268	21.932	23.2914	22.5801	NaN	23.1867	NaN	21.7611	NaN	22.8987	NaN	21.8088	23.5506	22.1582	NaN	22.9102	23.2636	NaN	23.4326	NaN	22.1571	22.7355	23.6118	NaN	23.3985	NaN	22.8778				6	6	3	20.8	20.8	12.2	61.446	0	13.933	199070000	34
22.8646	NaN	22.9011	23.1296	23.724	NaN	NaN	23.6442	23.5248	22.752	23.4449	23.1314	23.5034	22.5965	NaN	22.4707	NaN	22.1829	22.9776	22.4398	22.4235	22.4029	22.8669	NaN	23.7549	24.2759	21.8997	22.9168	23.636	22.8994	NaN	22.7825	23.0794	23.4585	23.2266	23.4284				5	5	5	24.7	24.7	24.7	45.353	0	11.568	261600000	36
22.8159	23.2829	23.1966	22.9077	22.755	22.9959	23.2059	22.4178	22.8547	22.4831	22.7795	23.2559	23.1277	22.8721	22.9253	22.3112	21.5454	NaN	23.0454	22.981	23.3863	23.007	23.148	22.2226	23.3351	23.3769	23.409	22.1308	22.4672	22.7588	22.9071	22.9581	23.0775	23.086	23.409	24.4489				9	9	9	12.5	12.5	12.5	109.96	0	43.241	296240000	113
30.3039	30.2944	28.5035	29.3384	29.2981	28.5387	29.6931	29.2487	28.2195	29.0333	29.3952	28.9396	29.0927	28.1989	28.1101	28.6887	28.3498	30.1169	29.5127	28.3881	29.1947	29.1809	29.5254	29.6378	29.7698	29.752	27.6559	28.7151	30.0153	28.292	27.9895	29.7383	28.4927	29.3392	28.4972	29.1586				9	9	9	72.4	72.4	72.4	19.108	0	323.31	25577000000	346
NaN	NaN	NaN	NaN	NaN	21.7531	21.3116	NaN	21.3589	21.0479	NaN	NaN	NaN	NaN	NaN	NaN	NaN	NaN	NaN	20.9773	NaN	NaN	NaN	NaN	NaN	NaN	21.3478	NaN	NaN	21.749	21.5581	NaN	NaN	NaN	NaN	NaN				3	3	3	8	8	8	51.355	0	16.725	33389000	14
25.448	25.164	25.4647	25.3784	25.9528	24.8283	24.6635	24.8955	24.5886	25.071	24.4765	25.0667	25.2538	24.784	20.7321	24.0721	23.7577	25.4939	25.2915	23.3786	24.3021	24.9294	24.8561	25.2033	24.7991	25.4267	23.1724	24.8745	25.4121	23.7307	24.0597	25.1949	24.4839	24.462	24.2235	24.7375				2	2	2	15.7	15.7	15.7	15.005	0	53.288	1222200000	83
24.2666	24.1476	22.3013	24.6276	24.5089	23.1657	25.0177	25.9199	24.3754	24.9603	24.5816	24.7962	24.2702	24.7063	23.288	24.8528	23.2694	25.3604	24.9344	23.6867	23.9954	24.5768	23.2907	25.1063	24.12	24.7094	24.6101	24.8207	25.5313	NaN	23.7787	24.8543	23.801	25.0084	23.6403	24.9755				2	2	2	8.6	8.6	8.6	25.104	0	323.31	1005100000	75
NaN	NaN	23.7861	NaN	22.0763	22.2085	NaN	22.2793	NaN	NaN	NaN	NaN	NaN	NaN	NaN	20.9942	NaN	21.5843	21.7203	22.3568	21.7964	22.2474	22.7106	22.472	21.9683	21.9127	22.2895	21.6934	NaN	NaN	22.3806	NaN	NaN	NaN	NaN	NaN				2	2	2	9.1	9.1	9.1	56.289	0	18.663	91943000	24
NaN	NaN	NaN	23.3729	22.644	NaN	NaN	23.5195	NaN	22.4886	22.3093	23.2273	23.7684	NaN	24.0612	23.4083	NaN	NaN	NaN	23.3178	NaN	NaN	NaN	23.7721	23.0464	NaN	22.8895	23.1086	22.4177	22.8508	23.6007	23.8458	23.1375	23.0423	NaN	NaN				3	3	3	23.4	23.4	23.4	19.608	0	52.131	233590000	26
25.6705	25.3797	25.0563	25.5647	25.756	24.8603	NaN	24.9578	24.4909	25.6823	25.0047	26.0018	24.834	25.1578	25.8583	24.3431	24.0293	25.7901	25.8898	25.2732	24.7995	25.5277	25.5031	24.5	NaN	25.2239	22.2897	25.1706	26.306	25.7301	25.817	26.0746	25.2205	25.554	24.7022	24.4606				2	2	2	5.6	5.6	5.6	49.692	0	37.913	1688000000	55
24.9568	24.0487	24.5199	NaN	24.5229	25.1065	24.1995	24.09	24.0738	NaN	24.0787	23.5638	23.9958	24.8228	24.1896	23.4986	23.3673	25.1252	NaN	23.7988	24.6502	24.1725	24.6842	24.8513	24.4084	NaN	22.5925	24.5877	23.9774	23.8722	23.2863	24.2804	23.9231	24.3988	24.3235	24.2523				2	2	2	31.3	31.3	31.3	10.921	0	53.635	719660000	44
26.6799	26.674	26.8567	26.3577	26.7492	26.7248	26.9269	26.706	26.3736	26.5285	26.4966	26.7421	26.9408	26.2922	26.6174	25.5272	25.7331	25.7877	26.7182	26.5058	26.3101	26.6771	27.0214	26.6606	26.6655	26.5713	26.0068	26.8265	26.5295	26.2657	26.4669	26.5925	26.3462	27.3002	26.2609	24.9366				8	8	8	37.6	37.6	37.6	38.792	0	219.04	3827400000	140
24.4906	24.5678	NaN	25.1673	23.651	25.178	25.0038	24.8429	24.5765	25.2777	24.3705	25.5389	24.9655	24.2621	25.1227	24.7667	24.0897	24.6898	25.0855	25.2726	25.2852	25.3039	25.3199	25.5446	25.3678	25.4808	24.6647	25.6314	25.4179	24.5945	24.8075	25.586	NaN	25.5829	24.0822	24.623				5	5	5	24.2	24.2	24.2	36.954	0	44.678	1261700000	113
28.1284	28.3638	28.324	28.2318	28.7198	28.1295	28.0024	28.6931	28.1739	28.6275	28.2424	28.483	27.9786	28.3973	28.7083	28.0415	27.6974	28.7292	28.1923	28.4176	27.9933	28.6133	28.5401	28.2636	28.7192	28.9696	28.4777	28.6211	28.8427	27.9567	28.3136	28.5926	28.0948	28.4367	27.9664	29.0053				38	24	23	54.1	37.1	35.9	104.85	0	323.31	15274000000	729
21.8312	NaN	22.4321	NaN	NaN	NaN	NaN	NaN	NaN	NaN	NaN	NaN	NaN	NaN	NaN	NaN	NaN	NaN	22.1478	20.7744	NaN	21.2132	21.5407	NaN	21.6605	22.0866	NaN	21.6163	NaN	NaN	NaN	NaN	NaN	22.0278	NaN	NaN				3	3	3	29.8	29.8	29.8	17.896	0.00026199	4.1364	31119000	7
23.0529	22.2568	22.544	22.576	22.3389	NaN	NaN	NaN	NaN	NaN	19.8486	NaN	NaN	NaN	NaN	NaN	NaN	22.7409	22.7083	NaN	21.9062	22.5795	NaN	22.621	21.7801	21.5777	NaN	22.687	NaN	NaN	NaN	22.3781	NaN	21.9373	NaN	21.8041				3	3	3	31.6	31.6	31.6	15.086	0.00050594	3.5554	93822000	20
NaN	NaN	NaN	NaN	NaN	NaN	21.4014	NaN	NaN	NaN	NaN	21.682	NaN	NaN	NaN	NaN	NaN	NaN	NaN	20.8314	NaN	NaN	21.7381	NaN	21.3851	NaN	NaN	NaN	22.1542	NaN	NaN	21.9429	NaN	NaN	NaN	NaN				4	4	4	6.6	6.6	6.6	85.852	0	17.574	40946000	12
NaN	NaN	NaN	NaN	NaN	NaN	NaN	24.9721	NaN	NaN	26.3574	NaN	NaN	NaN	NaN	NaN	NaN	NaN	NaN	25.7927	NaN	27.5548	NaN	NaN	26.6517	NaN	25.0195	NaN	NaN	25.9591	NaN	26.9143	NaN	NaN	NaN	28.7761				2	2	2	3.7	3.7	3.7	64.665	0.0089724	1.8527	1235600000	5
23.3099	22.9686	23.8846	22.3337	23.0369	23.1275	22.3587	22.7782	23.0142	22.8994	22.877	23.1329	22.5505	22.3436	22.8284	23.2956	22.7977	23.182	23.3155	23.8016	NaN	22.595	23.202	23.2572	22.4898	23.7487	22.7846	23.2028	23.214	22.6756	22.8756	22.5642	NaN	22.6133	22.8012	NaN				9	9	9	18.5	18.5	18.5	91.35	0	26.819	317740000	78
21.8602	22.7311	NaN	21.9006	NaN	21.2654	22.0676	22.3466	22.5566	22.4598	22.0007	NaN	22.7792	NaN	21.398	NaN	23.0112	21.9432	NaN	21.994	22.8661	NaN	NaN	21.8837	22.2814	NaN	22.0565	21.9635	22.3468	22.5005	NaN	22.4946	NaN	21.758	NaN	22.477				3	3	3	22	22	22	29.176	0	153.86	143120000	23
24.7698	NaN	NaN	NaN	NaN	NaN	NaN	NaN	24.2506	24.5537	24.0298	NaN	NaN	24.5332	24.7018	NaN	NaN	NaN	24.3051	NaN	NaN	NaN	NaN	NaN	NaN	NaN	24.0126	24.5607	24.8455	23.6342	24.8867	24.6785	NaN	24.9396	NaN	NaN				2	2	2	8.9	8.9	8.9	24.81	0	10.415	329260000	7
22.8738	22.2229	NaN	23.3519	22.7931	NaN	NaN	22.6908	NaN	22.5367	22.3043	22.8156	22.7823	22.237	21.6332	24.068	NaN	23.3069	NaN	NaN	22.3636	22.2515	22.6788	22.251	NaN	22.2037	21.868	NaN	22.5264	22.3299	NaN	22.9731	NaN	NaN	22.243	22.521				3	3	3	13.1	13.1	13.1	34.063	0	21.639	177710000	35
25.8267	25.5878	25.7369	25.0865	25.6554	25.4406	25.6449	25.5274	25.4004	25.5913	25.4681	25.8219	25.6197	25.2415	25.5871	25.3053	24.7548	25.8699	25.603	26.0196	25.6649	25.6676	25.9661	25.5279	25.633	26.1817	25.6209	25.6802	25.7389	25.8489	25.3325	25.8856	25.7214	25.5449	25.62	26.0478				13	13	13	31.4	31.4	31.4	62.942	0	323.31	2136400000	312
NaN	NaN	NaN	NaN	NaN	23.8199	NaN	NaN	22.7048	23.5152	23.3296	NaN	23.0337	23.7027	23.8153	NaN	23.7986	NaN	NaN	23.8765	NaN	NaN	NaN	NaN	23.5128	NaN	24.3504	22.8437	NaN	23.9967	25.2202	22.5793	23.0177	23.6649	22.8927	NaN				6	6	6	9.4	9.4	9.4	131.98	0	43.538	283740000	20
23.1649	24.4753	22.7016	23.5049	23.2356	22.6779	23.0386	22.6072	23.3357	23.3469	22.6145	23.1561	21.8638	NaN	21.3765	21.2892	21.2754	24.3171	23.0812	21.9193	22.8625	23.3221	22.6558	22.7268	22.7643	21.9214	21.9048	22.433	23.1433	21.6232	NaN	22.5331	21.8221	22.6091	22.2022	22.384				3	3	3	33.6	33.6	33.6	13.596	0	53.186	307380000	50
27.652	27.4139	27.4995	27.5601	26.9096	27.3955	27.2554	27.5604	26.797	27.4404	27.1536	27.171	27.5104	26.3571	27.3864	24.981	26.5331	27.1181	27.8837	26.9788	27.117	27.337	27.8498	28.6036	26.8896	26.8554	26.9197	28.1845	27.7392	27.5764	26.8776	27.7657	27.146	27.0967	27.5125	26.7196				7	7	7	41.4	41.4	41.4	26.227	0	323.31	6612900000	192
23.138	24.0048	24.9454	NaN	22.7283	23.0844	NaN	23.2232	NaN	23.5713	NaN	23.8666	NaN	23.9242	24.6765	22.595	22.7162	23.2626	24.2848	24.2736	22.7246	NaN	23.3676	NaN	24.0613	23.706	23.4364	25.3153	NaN	24.0182	24.1144	24.345	NaN	24.8551	22.2252	22.6185				5	5	5	23.8	23.8	23.8	45.283	0	70.419	464240000	27
22.8559	NaN	23.2935	23.803	NaN	22.5134	23.4399	23.3636	21.8193	23.0812	22.5733	23.2924	22.4205	23.409	23.9849	22.2336	23.4803	23.0908	22.236	22.8815	23.1418	23.289	22.8255	NaN	23.163	22.8872	23.0974	23.3756	23.0914	23.082	23.6856	22.5348	23.3982	23.6208	23.0475	23.3564				6	6	6	14.1	14.1	14.1	86.131	0	238.35	370790000	67
NaN	NaN	NaN	NaN	NaN	NaN	NaN	20.8755	NaN	21.0973	20.87	21.438	21.2495	NaN	NaN	NaN	NaN	NaN	NaN	NaN	21.3922	20.9183	NaN	NaN	NaN	NaN	21.3614	20.9591	NaN	22.0235	NaN	20.5507	21.1023	NaN	NaN	NaN				3	3	3	10.4	10.4	10.4	42.183	0	7.7604	96294000	14
23.1285	NaN	NaN	23.0191	NaN	22.3724	23.6187	22.2083	23.8784	23.1109	23.9139	22.5297	22.8087	23.7633	22.6686	23.6354	NaN	NaN	NaN	22.5719	23.5958	NaN	23.6107	NaN	22.7073	NaN	24.0644	22.5299	22.5603	22.7556	22.8549	22.088	23.6634	22.8961	23.9306	22.7434				3	3	3	26	26	26	17.639	0	27.759	256150000	44
22.6584	NaN	NaN	21.4949	22.1481	NaN	NaN	NaN	NaN	21.7117	20.8848	21.6308	20.9264	NaN	NaN	NaN	NaN	21.6396	22.2356	21.7505	NaN	21.2947	NaN	22.0262	22.0907	NaN	21.6223	20.5101	NaN	NaN	21.5792	22.2118	NaN	NaN	NaN	NaN				5	3	3	12.5	8.5	8.5	58.951	0.00027071	4.7871	64631000	18
NaN	NaN	NaN	NaN	NaN	NaN	NaN	NaN	23.3452	22.0637	NaN	NaN	NaN	NaN	NaN	NaN	NaN	NaN	NaN	NaN	NaN	NaN	NaN	NaN	21.2949	NaN	NaN	NaN	NaN	21.3503	NaN	NaN	22.4673	NaN	22.635	NaN				2	2	2	11.8	11.8	11.8	38.087	0	6.518	29271000	7
NaN	NaN	NaN	NaN	NaN	NaN	NaN	NaN	20.9754	NaN	NaN	NaN	NaN	NaN	23.4929	NaN	NaN	NaN	NaN	22.6529	NaN	NaN	NaN	NaN	NaN	NaN	22.2569	22.9574	NaN	NaN	NaN	20.7778	NaN	NaN	NaN	NaN				3	3	3	29.2	29.2	29.2	12.517	0.00051033	3.7074	37689000	4
NaN	22.2922	NaN	22.9395	22.3734	21.6801	NaN	NaN	NaN	NaN	NaN	21.9525	NaN	NaN	21.9561	21.198	NaN	22.0061	NaN	21.6186	21.7664	22.0015	NaN	NaN	21.8436	20.4375	NaN	NaN	NaN	NaN	NaN	NaN	NaN	NaN	NaN	NaN				2	2	2	20.7	20.7	20.7	17.42	0	5.4865	62356000	11
NaN	24.2216	24.895	NaN	NaN	NaN	NaN	25.1322	NaN	25.7309	24.1184	26.0828	NaN	NaN	NaN	24.6791	NaN	NaN	NaN	NaN	NaN	23.777	NaN	NaN	22.3069	NaN	NaN	NaN	NaN	23.871	25.2352	24.4661	24.0227	24.8534	NaN	NaN				3	3	3	33	33	33	12.664	0	72.032	512590000	24
20.5857	22.2453	23.6472	NaN	22.9457	21.6118	22.4522	22.8577	NaN	23.016	22.6541	23.3617	21.8417	NaN	23.2166	22.9086	23.7205	NaN	NaN	24.3812	23.5455	22.372	23.2641	21.9198	23.4956	23.4394	20.3462	23.3141	22.7366	24.0737	24.8976	23.3009	23.545	23.328	21.4823	20.2306				8	8	8	20.9	20.9	20.9	71.689	0	31.586	328820000	51
24.7674	25.2463	25.085	25.6213	25.4344	24.3257	25.0676	NaN	24.1499	24.3481	24.5621	24.0599	24.4366	24.0796	24.2241	24.6075	23.9122	24.5918	25.4525	23.7837	24.9325	24.7985	24.8886	24.9957	23.752	24.2595	23.372	24.8641	24.9334	24.2418	23.6693	25.0661	23.8138	24.2798	24.5147	24.3251				3	3	3	56.7	56.7	56.7	10.998	0	206.06	1051700000	90
NaN	NaN	21.4546	NaN	NaN	NaN	NaN	NaN	NaN	NaN	20.7832	21.3031	20.9197	NaN	NaN	NaN	NaN	NaN	NaN	21.8459	NaN	NaN	NaN	NaN	21.4741	NaN	20.4633	NaN	21.0175	21.2278	21.7571	20.9232	21.0104	21.2056	NaN	NaN				6	5	5	8.1	7.2	7.2	119.26	0.00027322	4.9881	34031000	15
27.0327	27.1417	26.5862	26.6388	26.9497	26.0441	26.4811	26.7878	26.1028	25.5573	26.6649	27.226	27.051	25.5202	26.606	26.548	25.8951	26.6786	26.9129	26.2393	26.2522	26.7121	27.4579	26.8666	26.4874	27.3695	24.5952	26.6982	27.0651	26.4069	26.0866	27.1733	26.2027	27.0087	26.3857	26.9959				6	6	5	47.9	47.9	38	16.801	0	323.31	4922500000	244
NaN	NaN	NaN	24.2593	NaN	23.5761	NaN	NaN	NaN	22.5006	NaN	24.3552	NaN	NaN	22.378	NaN	23.7103	22.1418	NaN	NaN	NaN	NaN	NaN	NaN	NaN	NaN	NaN	NaN	NaN	NaN	NaN	NaN	22.1808	22.2785	NaN	21.8665				5	5	5	19.3	19.3	19.3	55.99	0	208.87	131730000	24
24.0251	25.3454	25.5441	23.8229	25.0215	24.2429	24.0921	24.4074	NaN	25.1401	23.3799	24.8641	24.2493	23.6486	25.0005	24.3273	24.2472	24.6141	25.3207	24.7475	24.4761	25.6521	24.5604	24.633	24.7443	25.3819	24.6121	25.1152	24.6756	24.8595	24.9028	25.2829	24.3261	25.0154	24.4877	24.5127				10	10	10	39.3	39.3	39.3	40.925	0	215.74	1370800000	261
NaN	NaN	NaN	NaN	NaN	NaN	NaN	NaN	NaN	22.4423	21.7546	22.8328	21.8484	NaN	23.0398	22.7584	NaN	NaN	NaN	22.5414	NaN	23.1784	NaN	NaN	21.9191	NaN	22.2861	21.8691	NaN	23.425	22.5743	22.8074	22.213	NaN	NaN	NaN				6	6	6	6.4	6.4	6.4	121.9	0	27.81	116360000	20
NaN	23.334	NaN	21.9815	NaN	22.3017	22.5473	22.1509	22.3335	21.2951	21.6525	21.4162	21.8445	NaN	21.3209	NaN	22.3149	22.4975	22.3817	21.8413	22.138	22.2544	22.014	22.5108	22.1465	22.2456	22.091	NaN	22.2359	NaN	21.3466	21.0836	21.8535	21.8714	21.9526	22.3689				5	5	5	9.3	9.3	9.3	128.61	0	34.932	130380000	43
NaN	NaN	NaN	NaN	NaN	23.9632	NaN	24.3887	NaN	24.105	NaN	24.208	23.2768	NaN	24.6489	NaN	23.9747	NaN	NaN	24.2008	NaN	23.9638	NaN	24.9208	24.0044	23.9971	23.5181	NaN	NaN	24.0997	23.4964	24.1069	NaN	NaN	NaN	NaN				8	8	8	10.2	10.2	10.2	171.29	0	19.33	288350000	19
NaN	NaN	NaN	NaN	NaN	NaN	NaN	NaN	NaN	NaN	NaN	NaN	NaN	NaN	21.7991	NaN	NaN	NaN	NaN	NaN	NaN	NaN	NaN	NaN	NaN	NaN	NaN	NaN	NaN	NaN	NaN	NaN	NaN	NaN	NaN	NaN				2	2	2	3	3	3	143.14	0.0066094	2.1257	6241000	2
NaN	23.4504	22.8616	NaN	NaN	21.2774	22.0591	NaN	NaN	NaN	22.422	21.7669	NaN	NaN	22.6969	21.8684	22.9128	NaN	NaN	22.6036	NaN	22.1974	NaN	NaN	22.4002	22.1587	22.9075	22.0322	NaN	23.266	22.6635	NaN	20.8512	NaN	NaN	NaN				6	6	6	10.8	10.8	10.8	107.57	0	107.06	137540000	27
21.344	NaN	22.6368	21.906	22.5653	NaN	22.017	NaN	NaN	NaN	NaN	NaN	NaN	NaN	NaN	NaN	NaN	NaN	21.8617	20.4143	21.4732	NaN	NaN	NaN	NaN	NaN	NaN	NaN	NaN	NaN	NaN	NaN	NaN	NaN	21.9568	NaN				4	4	4	11.4	11.4	11.4	92.902	0	9.1903	32952000	14
NaN	NaN	NaN	NaN	NaN	NaN	NaN	NaN	NaN	NaN	NaN	NaN	NaN	NaN	NaN	NaN	21.4555	NaN	NaN	NaN	NaN	NaN	NaN	NaN	NaN	NaN	NaN	NaN	NaN	NaN	NaN	NaN	NaN	NaN	NaN	NaN				2	2	2	2.3	2.3	2.3	139.55	0.0077838	1.9545	6128900	4
NaN	NaN	NaN	NaN	NaN	NaN	NaN	NaN	NaN	NaN	NaN	NaN	NaN	NaN	NaN	NaN	23.2254	NaN	NaN	NaN	NaN	NaN	NaN	NaN	NaN	NaN	NaN	NaN	NaN	NaN	NaN	NaN	NaN	NaN	NaN	23.2778				4	4	4	3.6	3.6	3.6	204.74	0.00026021	4.0416	35402000	4
25.2779	24.7175	21.2477	24.2889	24.1764	22.7278	NaN	NaN	NaN	25.5964	24.4536	25.5505	NaN	NaN	24.0494	23.1818	NaN	22.9001	NaN	25.2319	22.4061	23.6497	24.112	23.4983	24.7599	24.3153	24.2187	22.9669	23.1609	24.9055	25.0263	24.2141	23.5475	24.6877	24.1752	23.3957				13	13	13	11.4	11.4	11.4	198.31	0	29.12	684890000	107
NaN	NaN	21.3359	20.8745	21.4511	22.047	21.648	22.1094	22.4936	21.0309	NaN	21.0675	21.7113	NaN	NaN	22.3283	21.1158	22.027	21.1302	22.4281	NaN	NaN	20.467	20.8776	21.8311	21.3184	21.544	NaN	21.9927	NaN	NaN	21.045	NaN	NaN	NaN	22.0589				3	3	3	3.6	3.6	3.6	175.74	0	96.804	91614000	21
23.1825	22.5819	23.2643	23.189	22.833	23.775	22.5181	23.0209	23.1813	22.2347	22.9921	23.4427	24.7978	23.2293	22.4947	21.9707	NaN	22.9514	NaN	23.3354	22.6254	22.2153	23.0393	NaN	22.8293	23.1527	23.4945	22.9522	23.4344	22.1001	23.0284	22.181	22.0703	22.6672	22.8142	23.5183				6	6	5	17.2	17.2	14.5	74.435	0	11.038	301000000	50
26.3306	25.4701	25.987	26.8503	25.347	26.171	27.3278	26.2941	26.4467	25.7194	25.9305	25.1724	25.7446	26.3987	25.898	25.4919	25.2306	26.3596	26.1564	25.6211	26.1141	25.5289	26.1434	26.0796	25.5005	25.0945	25.2238	26.0454	26.3417	25.0147	24.8134	25.6152	25.4569	25.2764	24.9865	25.5793				7	7	6	54.9	54.9	50.6	18.762	0	59.861	2564300000	177
24.5884	24.2091	24.3222	24.9921	24.5803	24.2548	24.8755	25.161	24.2682	24.7605	24.7517	24.824	24.718	24.6031	24.1525	24.5452	23.1686	25.4893	24.655	24.8022	24.2604	24.5857	24.6835	25.5485	25.0266	24.6492	24.3791	24.6476	25.2703	24.1119	24.6681	24.7098	24.2632	24.8999	24.4596	24.0005				9	9	9	35	35	35	45.378	0	137.81	1072800000	194
20.6301	21.6589	20.9865	21.8248	22.0066	21.265	21.4877	20.6641	21.4654	20.749	21.1375	21.2283	21.0744	21.6436	20.4804	20.4673	21.4627	21.4406	21.7753	21.0028	21.701	21.5856	20.8209	20.856	21.5668	21.3961	20.6857	20.5999	21.0501	20.6487	20.4431	21.365	20.5628	21.136	20.9913	21.0998				5	5	5	29.3	29.3	29.3	28.114	0	14.028	95259000	57
21.8799	22.7063	21.8131	22.1403	22.6225	22.128	21.1981	21.2139	21.6971	23.0851	21.7025	22.8897	22.1057	21.4675	23.1392	21.6231	21.7567	21.9968	22.1836	21.9449	22.7683	NaN	22.2512	21.8735	22.6832	23.5159	22.1147	22.4767	22.2639	22.3335	22.4927	22.5056	22.1951	NaN	22.0082	21.3553				7	7	7	16.2	16.2	16.2	102.91	0	50.173	185140000	62
NaN	NaN	NaN	22.109	NaN	22.1462	NaN	NaN	22.3066	21.5767	NaN	21.5463	21.2763	22.8519	NaN	21.3114	21.8604	21.1716	NaN	NaN	22.4843	NaN	NaN	NaN	NaN	NaN	21.8927	21.4076	NaN	22.3002	22.2082	NaN	NaN	NaN	NaN	NaN				2	2	2	7.6	7.6	7.6	36.742	0.00098353	3.1841	78651000	21
NaN	NaN	21.0175	NaN	NaN	NaN	NaN	NaN	NaN	20.9715	19.5796	20.8196	19.0459	NaN	NaN	NaN	NaN	NaN	NaN	20.8292	20.2683	NaN	NaN	NaN	NaN	20.2226	20.5513	17.9338	20.4022	18.4554	NaN	21.1176	NaN	18.4901	NaN	NaN				2	2	2	3.1	3.1	3.1	65.521	0.00026151	4.1056	23168000	15
NaN	NaN	NaN	NaN	20.4633	NaN	NaN	NaN	20.9844	21.2924	NaN	21.6261	21.1106	NaN	NaN	NaN	21.0887	20.7735	NaN	21.1446	NaN	NaN	NaN	NaN	21.2476	20.857	NaN	NaN	NaN	NaN	NaN	19.9518	NaN	NaN	20.8754	21.4882				3	3	3	4	4	4	118.02	0.00027685	5.3004	31206000	9
22.2707	20.7714	20.9991	NaN	NaN	NaN	NaN	NaN	22.2577	22.2218	21.4958	22.2971	22.8508	NaN	22.2446	22.0238	NaN	20.7924	NaN	20.8271	NaN	NaN	NaN	NaN	22.6792	21.6398	NaN	23.1133	21.6784	22.0936	NaN	21.1889	NaN	22.1058	21.2126	NaN				2	2	2	11.3	11.3	11.3	41.949	0	66.096	98715000	26
21.8568	22.045	NaN	22.0501	21.1498	23.4516	25.0671	24.0092	24.187	22.8376	24.0855	22.6264	23.9217	24.6143	22.4095	20.2882	23.574	21.5667	NaN	24.2175	23.4298	22.0384	23.3613	NaN	23.1584	NaN	23.9339	22.7304	22.7622	23.0053	22.3747	21.2848	22.2982	22.8637	23.8782	21.5234				9	9	9	19.8	19.8	19.8	84.784	0	88.932	339760000	55
NaN	NaN	NaN	NaN	NaN	NaN	21.3519	NaN	NaN	NaN	NaN	NaN	NaN	NaN	NaN	NaN	NaN	NaN	NaN	NaN	NaN	NaN	NaN	NaN	NaN	NaN	NaN	NaN	NaN	NaN	NaN	NaN	NaN	NaN	NaN	NaN				2	2	2	3.4	3.4	3.4	89.837	0.00098619	3.228	7259100	2
25.7472	26.1146	25.3102	25.7095	26.0016	24.2331	23.9971	25.3737	24.8114	25.7379	25.1635	26.0208	25.2712	23.9006	26.1738	25.7106	25.2016	25.4151	25.7823	25.761	25.5425	26.0776	25.7114	25.6042	26.1779	26.6621	25.9839	25.4194	25.9316	26.0088	25.935	26.3796	25.496	26.1932	24.8913	26.0477				23	23	23	29.4	29.4	29.4	138.91	0	323.31	2325900000	371
24.9207	22.8071	NaN	23.9705	23.6698	23.8442	23.9952	23.8026	NaN	22.9159	23.3939	23.5605	23.5814	23.8437	23.3461	22.8775	22.5791	23.7796	24.0116	24.0356	23.455	23.8861	NaN	NaN	22.0704	23.9303	NaN	22.9712	23.8892	NaN	22.9858	NaN	23.409	24.1784	NaN	22.4823				3	3	3	32.7	32.7	32.7	18.092	0	27.421	403760000	37
NaN	NaN	20.2375	20.5857	NaN	20.3333	NaN	20.2417	19.7881	19.4851	19.5735	NaN	20.3361	NaN	20.4307	NaN	NaN	NaN	19.9164	20.6383	NaN	20.194	NaN	NaN	20.8553	NaN	20.5041	20.1021	NaN	19.982	20.7577	NaN	NaN	NaN	20.2585	NaN				3	3	3	5.1	5.1	5.1	85.566	0	46.971	24774000	18
28.819	28.1247	27.4682	28.7569	28.8185	28.1052	28.813	28.4615	28.8463	28.3961	28.7581	28.6554	28.8104	28.9497	27.3198	28.2178	27.8784	28.7217	28.5302	27.5353	28.8054	28.2487	28.5723	28.0447	27.8947	28.0964	28.4036	27.9664	28.8066	27.7619	27.7469	28.6211	28.5732	28.1974	28.1889	28.8218				14	14	14	57.3	57.3	57.3	45.803	0	323.31	16255000000	581
23.1157	NaN	21.7515	21.8767	21.802	22.0041	NaN	22.5675	23.4419	22.1552	22.0637	23.0117	23.3352	23.4705	23.6087	21.1267	22.4572	21.1651	NaN	24.1474	22.7356	23	22.3086	22.9956	23.5382	22.3422	24.4191	23.5388	22.6885	22.4335	21.9859	22.6654	22.5692	23.5518	23.6007	22.7065				9	9	6	33.4	33.4	26.1	60.029	0	102.56	274170000	61
23.2079	NaN	23.2317	25.6417	24.6698	23.8318	24.0589	23.3641	26.1521	24.5036	25.3508	23.1817	24.8125	26.4294	24.3505	24.3831	26.832	23.3569	22.4822	23.6813	26.5635	25.0846	23.2785	NaN	23.7394	23.5883	27.3481	23.4274	24.1479	24.9833	25.0172	20.3061	25.7988	23.2048	24.7035	24.1622				15	15	15	52.2	52.2	52.2	55.023	0	301.74	1341100000	119
24.1638	25.6299	26.2329	24.5692	26.0083	23.4907	23.7583	25.7531	23.5354	25.7353	24.6541	26.1146	24.3545	23.7893	25.6125	25.2612	24.4371	25.0739	26.3588	26.0862	25.55	26.7077	25.7832	25.9332	26.7641	27.2026	25.0898	25.8255	26.1767	25.4234	25.0314	26.0578	25.1972	26.807	25.0886	24.4859				8	8	8	30.1	30.1	30.1	43.332	0	323.31	2305400000	192
NaN	NaN	23.3961	NaN	NaN	NaN	22.2424	21.6998	NaN	22.5596	22.9301	NaN	22.1818	23.0752	23.3431	21.7527	23.1845	22.5526	NaN	22.7597	22.9234	22.1113	21.6354	NaN	22.4875	NaN	24.1592	22.3714	NaN	23.4672	23.3632	NaN	23.455	22.0342	22.4987	NaN				10	10	10	20.5	20.5	20.5	108.17	0	24.033	209600000	66
24.0218	25.2103	22.3983	22.8937	21.8595	22.9141	23.3773	23.1547	22.8032	22.8207	22.8446	22.5972	22.8051	21.2656	22.4409	NaN	22.7588	22.3903	NaN	22.6755	23.6018	NaN	NaN	23.6636	22.92	23.3258	22.2741	NaN	23.2677	22.376	22.2422	23.6352	22.2162	21.1544	23.3386	23.4339				4	2	2	41.6	29.2	29.2	12.823	0	147.21	335860000	38
27.2041	26.7944	26.8797	27.052	27.1912	26.727	27.3416	27.2593	27.0349	26.8634	26.6982	26.7071	26.7685	27.3947	27.3156	26.8792	26.0851	27.1818	27.0909	26.8093	26.4887	26.6206	27.008	26.582	26.6554	27.3851	26.5571	27.0923	26.818	26.9222	26.503	27.1398	26.2444	26.8746	26.4302	26.7782				9	8	8	25.6	23.7	23.7	58.47	0	323.31	4929300000	163
21.9185	23.7873	23.4454	19.6958	22.2378	23.4931	NaN	22.3455	NaN	22.8859	NaN	21.3907	22.8961	22.7689	22.3432	21.6071	23.458	23.4051	23.774	23.5008	22.7677	22.6061	22.6747	NaN	19.6825	NaN	22.9259	NaN	NaN	22.6297	NaN	22.091	NaN	22.6155	22.8553	NaN				5	5	5	25.4	25.4	25.4	29.634	0	323.31	233300000	44
26.0255	25.4371	25.9686	25.8388	25.9461	25.6638	26.387	25.9022	25.8769	25.9709	25.8443	26.3046	25.4263	25.5299	25.7885	26.1301	25.4843	26.456	26.0843	26.4719	26.2602	26.1773	26.6359	25.5533	25.9836	25.9272	26.5122	25.7686	26.3585	26.0659	26.2453	25.7028	25.8124	25.8981	25.5782	26.2205				15	15	15	27.3	27.3	27.3	107.89	0	323.31	2734300000	310
26.8098	26.4411	26.3889	26.6626	26.707	27.1085	27.5324	26.9438	27.2673	26.3492	26.5463	27.0475	26.1311	26.514	25.6597	26.2867	26.4496	26.9317	26.6458	26.6024	27.3359	26.9578	26.9465	26.2321	26.4081	26.575	26.543	26.0046	27.3857	25.98	26.2672	26.8507	26.5905	26.5822	26.0821	27.04				14	14	2	57.1	57.1	6.1	53.818	0	323.31	4801900000	491
21.5538	21.8061	23.7602	22.3777	23.5238	22.8891	23.2601	23.1217	22.6193	23.137	23.4157	23.1846	22.8278	22.9281	23.3855	23.2349	NaN	22.4138	23.3198	23.3381	23.5869	23.0496	22.7446	22.6164	23.2	23.5608	22.7997	23.2233	22.7408	23.6227	23.215	23.1181	22.8946	22.6357	22.9633	23.104				9	9	9	22	22	22	70.755	0	145.5	328880000	125
23.1045	NaN	23.6495	23.1812	NaN	NaN	23.1132	22.5865	21.985	23.0528	22.0393	22.3502	22.6067	23.8748	23.1356	22.4408	26.7073	NaN	23.9197	22.7137	23.7317	22.295	23.7561	23.4524	23.2905	NaN	22.7312	22.1956	23.8181	NaN	22.8297	23.8685	22.121	23.1074	NaN	22.3364				3	3	3	41.2	41.2	41.2	18.706	0	45.48	528980000	37
23.2181	22.7158	24.2543	24.3489	24.5297	23.2018	23.8347	23.6689	23.362	24.0455	24.5824	24.7698	23.838	25.4727	24.1868	23.1862	24.5577	23.7512	22.8686	23.2811	25.341	23.7874	NaN	23.4381	24.6707	23.3472	25.7332	23.3199	22.2212	24.9605	24.6213	23.2448	25.2965	24.0495	21.9178	22.6782				2	2	2	16.3	16.3	16.3	19.258	0	323.31	743820000	71
NaN	NaN	24.0984	NaN	NaN	22.8065	21.6212	21.7229	NaN	22.5921	NaN	22.647	22.651	22.3197	24.3823	NaN	22.8583	NaN	NaN	23.5222	20.9045	22.5359	NaN	21.7444	21.6802	NaN	22.9646	23.5768	NaN	23.2217	23.8443	NaN	21.2729	22.5708	21.2765	NaN				5	5	5	16.9	16.9	16.9	47.602	0	11.528	204150000	64
NaN	23.6298	24.266	23.9973	24.9932	24.2304	NaN	24.0056	22.5191	24.2521	22.4149	23.9994	24.3278	23.4628	23.4082	22.5746	22.9615	24.2093	23.9546	24.4666	23.5978	24.4639	23.7913	23.9536	24.1936	24.0388	24.624	23.3681	23.4801	23.5397	24.1403	24.4068	23.8221	23.8494	24.0132	23.9001				8	8	8	9.8	9.8	9.8	138.83	0	25.796	606400000	69
23.1758	25.9356	24.2967	22.4077	23.3054	20.8627	NaN	23.37	20.982	23.6128	22.3661	23.3295	21.5236	20.5104	22.191	24.0008	20.2112	22.6985	24.2068	22.9913	22.0269	23.4922	23.1395	23.7622	23.4746	24.1857	21.8524	22.669	23.872	22.6188	22.8793	23.0135	22.1986	23.4827	22.8239	21.8773				2	2	2	29.6	29.6	29.6	13.928	0	81.519	767670000	86
23.9799	25.0098	24.7496	23.7607	23.8548	21.934	23.6113	24.4377	23.2465	24.7245	23.8746	24.6272	24.1713	23.684	24.3639	25.9034	25.5489	23.6371	23.7574	24.6033	25.2318	24.0961	24.7563	24.4314	24.5674	24.9335	24.6941	24.1163	23.8606	24.1797	24.2967	24.6489	24.2932	24.2492	24.489	24.6247				6	6	6	32	32	32	45.745	0	215.79	975130000	147
NaN	20.3261	22.3317	NaN	21.3568	NaN	21.3103	20.9418	NaN	21.679	21.4788	21.6855	NaN	NaN	22.8073	NaN	NaN	NaN	NaN	21.8558	20.8636	21.5593	21.7645	NaN	NaN	NaN	NaN	NaN	NaN	22.3232	NaN	20.7191	21.6821	NaN	NaN	NaN				2	2	2	2.3	2.3	2.3	152.22	0.00098063	3.1447	59412000	9
27.7434	28.5359	27.0669	27.8295	27.8947	27.1513	27.2276	27.0201	27.3759	27.4131	27.5728	27.1748	26.6679	26.8165	26.6404	28.3159	27.8746	27.6013	27.8413	26.4016	27.234	27.272	26.9025	27.5696	27.4348	27.3705	26.4092	27.331	27.6863	26.7123	26.4183	27.5595	27.2152	27.4846	27.1218	27.0274				6	6	6	55.8	55.8	55.8	16.832	0	150.93	8013300000	338
26.2509	25.2613	24.324	25.4189	25.3462	24.0207	24.9318	24.8865	NaN	24.9709	24.1206	24.6146	24.5638	NaN	24.3731	23.8482	23.689	25.6979	24.9717	23.7176	24.2086	24.9568	25.1934	25.2527	24.2918	24.7192	24.4866	24.7295	25.2338	23.7273	NaN	25.0018	NaN	25.1969	NaN	24.7412				3	3	3	17.2	17.2	17.2	14.21	0	8.2689	1015900000	55
23.8062	22.9714	23.5827	23.3798	23.8659	21.5302	23.0563	23.8148	NaN	22.585	23.8579	22.4247	23.7369	22.0334	21.5783	21.4584	22.3578	23.2874	23.4095	21.5734	23.1013	22.445	22.8059	22.8281	23.2828	NaN	NaN	22.1738	23.379	21.5426	NaN	23.2574	22.3071	22.6542	23.6499	24.3593				2	2	2	40.5	40.5	40.5	13.952	0	25.835	473910000	61
NaN	NaN	NaN	NaN	NaN	NaN	NaN	NaN	NaN	NaN	20.9888	21.3974	NaN	NaN	NaN	NaN	NaN	22.0041	NaN	NaN	NaN	NaN	NaN	NaN	22.3758	21.2431	NaN	NaN	NaN	NaN	NaN	23.1096	NaN	NaN	NaN	NaN				3	3	3	5.2	5.2	5.2	84.958	0.0019342	2.9587	62129000	9
NaN	23.4109	22.3258	22.4295	23.1353	22.3783	22.4816	NaN	21.954	22.1901	23.05	21.4994	NaN	22.1547	NaN	23.1782	23.4936	21.9168	21.9659	20.9205	25.4483	22.454	22.8688	21.2213	21.2393	21.6845	NaN	NaN	22.0234	NaN	NaN	23.3491	23.3786	21.0246	22.8486	23.3065				3	3	3	30.8	30.8	30.8	22.629	0	323.31	247000000	41
NaN	NaN	21.7785	21.4756	NaN	NaN	NaN	21.4774	NaN	21.2899	21.9133	21.3423	21.6681	NaN	NaN	NaN	20.9632	NaN	21.9713	22.2408	NaN	NaN	21.053	21.7172	21.359	NaN	21.3568	NaN	21.9292	21.3714	21.1989	21.2128	20.7456	NaN	NaN	NaN				4	4	4	3.9	3.9	3.9	163.84	0	10.355	64497000	29
28.9749	28.8287	28.6229	28.5618	28.2628	28.1947	28.3292	28.9706	27.9259	29.2719	28.3191	29.0022	28.5992	28.4695	29.4931	27.8746	27.4537	29.009	28.9086	29.0638	27.9206	29.208	28.963	28.6543	29.0459	29.0147	28.658	28.8901	29.2759	28.653	29.1066	29.236	28.5809	29.3764	28.0633	27.9083				18	18	18	56.3	56.3	56.3	66.193	0	323.31	19272000000	714
NaN	NaN	27.0292	NaN	NaN	19.4524	NaN	NaN	NaN	NaN	NaN	NaN	NaN	NaN	NaN	19.7754	NaN	NaN	NaN	NaN	NaN	NaN	NaN	NaN	NaN	NaN	NaN	NaN	NaN	NaN	NaN	NaN	NaN	NaN	NaN	NaN				7	7	7	18.5	18.5	18.5	66.67	0	62.186	137870000	11
NaN	NaN	NaN	NaN	NaN	NaN	NaN	NaN	NaN	NaN	NaN	NaN	NaN	NaN	NaN	21.1895	NaN	NaN	NaN	21.6618	NaN	NaN	NaN	NaN	21.6183	21.8795	NaN	NaN	NaN	NaN	NaN	NaN	NaN	NaN	NaN	21.9906				2	2	2	4	4	4	100.38	0.00049727	3.3434	22535000	6
NaN	21.9166	23.2843	22.3761	22.867	22.7419	23.0366	22.7874	NaN	21.2518	21.785	22.9245	NaN	NaN	NaN	24.0453	NaN	22.9714	NaN	23.104	NaN	22.8301	22.9156	23.0103	NaN	NaN	22.5968	21.9893	NaN	23.0081	21.7707	NaN	NaN	22.1134	NaN	NaN				9	9	3	9.2	9.2	3.4	165.85	0	43.761	180780000	29
26.0126	25.7406	26.0973	25.5468	26.0733	25.7639	25.4314	25.6987	25.7953	25.6135	25.0721	25.8134	25.756	25.5386	26.4041	25.1004	23.6748	26.2668	26.3346	25.5919	25.5716	25.7302	25.7804	25.8311	25.9397	26.1976	25.716	25.7795	25.4429	25.4579	25.502	25.4568	25.685	26.1413	24.7816	26.086				8	8	7	24	24	22.3	60.13	0	57.734	2167700000	157
NaN	22.6509	22.1397	22.4905	23.7882	21.9271	NaN	NaN	NaN	23.5255	NaN	NaN	20.5417	NaN	22.8675	NaN	21.7395	21.8833	23.6526	21.8774	22.219	23.1741	22.135	NaN	23.904	25.2062	NaN	22.9955	NaN	22.6312	23.0127	NaN	21.4912	23.6822	21.2861	22.903				7	7	7	10.6	10.6	10.6	119.39	0	64.289	191790000	32
NaN	NaN	22.7607	NaN	NaN	NaN	22.5813	NaN	NaN	23.4012	NaN	22.2133	NaN	NaN	NaN	NaN	NaN	NaN	NaN	NaN	NaN	NaN	NaN	NaN	NaN	NaN	21.6208	NaN	NaN	NaN	NaN	NaN	NaN	NaN	NaN	NaN				2	2	2	2.5	2.5	2.5	120.77	0.0071646	1.993	37994000	3
NaN	21.7793	21.1648	21.3412	NaN	NaN	NaN	NaN	NaN	NaN	NaN	NaN	NaN	NaN	21.434	NaN	NaN	NaN	NaN	21.519	NaN	21.8505	21.6344	NaN	21.3847	NaN	NaN	NaN	NaN	NaN	NaN	NaN	NaN	NaN	NaN	NaN				3	3	3	4.6	4.6	4.6	89.13	0.0041049	2.4444	26380000	6
23.2245	24.3213	24.0465	23.9393	23.5049	24.4548	24.8678	24.999	22.3023	24.0555	23.1718	23.7225	24.2976	24.7538	24.8065	24.8811	24.7605	24.4321	24.1086	25.6076	23.7978	23.9829	23.4264	22.9804	24.6517	24.298	24.8341	24.1997	23.7139	24.2706	24.0993	23.4428	23.5258	24.1081	23.5235	23.8998				27	27	27	18.4	18.4	18.4	254.41	0	104.42	802390000	199
NaN	24.0593	23.3784	22.5476	23.0329	22.1536	NaN	20.0348	22.5354	23.0178	21.4953	22.5026	NaN	NaN	21.6805	NaN	21.2669	23.5837	23.3827	NaN	NaN	22.6847	22.9792	22.566	23.1009	23.8083	21.7892	22.5037	23.601	22.2003	22.6534	22.8098	22.2187	22.2732	NaN	23.1799				3	3	3	7	7	7	98.125	0	18.356	235570000	39
NaN	NaN	NaN	20.2287	NaN	NaN	NaN	NaN	NaN	20.1602	NaN	NaN	NaN	NaN	NaN	NaN	21.1686	NaN	19.8884	20.3818	NaN	22.1654	NaN	NaN	NaN	22.5708	NaN	NaN	22.1908	NaN	NaN	NaN	NaN	NaN	21.4008	22.0486				3	3	3	6.1	6.1	6.1	81.871	0	5.4457	32664000	9
NaN	NaN	NaN	NaN	NaN	NaN	NaN	NaN	NaN	NaN	NaN	19.1853	NaN	NaN	NaN	NaN	NaN	NaN	NaN	20.2851	NaN	NaN	NaN	NaN	NaN	NaN	NaN	19.6628	NaN	NaN	NaN	NaN	NaN	NaN	NaN	NaN				6	2	2	3.8	1.3	1.3	246.75	0.0042977	2.377	3146200	2
22.5963	23.228	23.7924	24.4312	23.4375	24.4223	24.3852	NaN	22.8322	22.7067	22.8678	23.739	22.3672	20.6277	21.892	22.6953	22.9129	22.0053	24.3203	23.2246	23.3439	24.4726	23.3947	23.4386	22.6514	23.4981	22.8517	22.3702	23.1804	23.2192	23.6655	23.2289	22.6541	23.4121	22.0626	24.1705				5	5	4	18.4	18.4	14.4	36.087	0	275.85	410000000	63
25.6529	23.184	23.1633	23.6467	23.4549	23.3429	23.3707	24.7184	NaN	22.1467	23.9298	23.6308	23.3066	22.7025	23.886	NaN	22.7361	23.5992	23.8302	23.3707	23.6942	22.8346	24.3711	23.4096	23.3998	24.0575	23.1665	NaN	24.1951	NaN	NaN	23.5464	22.2107	23.7852	21.7743	23.8865				4	4	4	37.2	37.2	37.2	21.007	0	66.477	408270000	44
24.2837	22.4797	24.0238	25.6606	NaN	22.9908	23.0273	22.9553	22.7886	23.0204	23.4939	22.2231	23.2189	23.7568	24.1754	21.6163	22.116	22.4557	NaN	24.6782	NaN	NaN	22.2971	23.1694	21.6904	NaN	23.7487	24.2247	22.7275	23.7513	23.7064	22.2226	22.8285	23.4641	22.2079	NaN				3	3	3	23.5	23.5	23.5	23.563	0	47.481	408110000	47
NaN	23.8622	22.707	NaN	21.6758	22.8415	22.8875	22.77	NaN	23.0919	22.8261	22.8831	22.8707	22.2732	23.2879	26.254	24.1232	21.7597	22.4964	25.1836	21.8079	22.0624	22.1411	22.2841	21.7358	NaN	23.7815	23.705	21.3075	23.8095	23.8119	NaN	22.9473	23.0828	21.8314	21.866				6	6	6	20.1	20.1	20.1	52.545	0	323.31	463390000	75
22.1408	23.622	22.9183	22.8475	22.9707	22.356	22.8064	22.3138	22.5761	23.034	22.4767	22.7842	22.7746	22.4483	21.8189	22.3202	22.636	NaN	22.8068	22.2287	22.9988	23.0199	21.6302	22.884	22.9337	23.3037	22.6188	22.4632	NaN	NaN	22.1139	22.8334	22.1535	22.1107	23.2567	24.1914				4	4	4	11.1	11.1	11.1	50.925	0	28.947	234820000	35
24.3648	NaN	23.3731	NaN	NaN	NaN	NaN	NaN	NaN	NaN	NaN	NaN	NaN	NaN	23.734	NaN	NaN	NaN	NaN	NaN	NaN	NaN	NaN	NaN	NaN	NaN	NaN	NaN	NaN	NaN	NaN	NaN	NaN	NaN	NaN	NaN				4	4	4	21.3	21.3	21.3	33.742	0.00027042	4.7456	43213000	5
NaN	NaN	23.4639	NaN	NaN	NaN	NaN	NaN	22.488	22.3031	NaN	20.7503	21.2648	20.9499	NaN	21.6817	24.5847	NaN	NaN	NaN	24.1588	NaN	NaN	NaN	22.3388	20.9523	21.8903	NaN	NaN	22.1779	21.9917	NaN	22.5918	20.7263	21.2894	NaN				7	7	7	7.1	7.1	7.1	132.56	0	56.428	148040000	36
27.5511	27.588	28.0038	28.058	27.6657	27.0008	27.6766	26.3017	26.936	27.2826	27.1435	26.7294	26.7066	26.6873	27.4551	26.6611	26.3807	27.2051	27.8502	26.5717	27.5168	27.7241	27.293	28.0031	26.9905	27.0129	26.3836	27.6463	27.0634	26.8198	26.7419	27.6099	26.7411	27.2935	26.8727	27.1681				7	7	7	66	66	66	21.868	0	185.98	6588100000	242
27.097	26.7609	25.7646	27.4889	27.0231	26.3301	26.7132	26.6321	26.2807	26.2083	NaN	26.6248	26.8611	26.1556	25.9681	25.5493	25.069	27.4323	26.771	25.7345	25.4987	26.4902	27.1172	27.1904	26.413	26.3282	25.3125	26.4465	27.0868	25.5859	NaN	26.7317	25.7803	26.7737	26.0618	27.8494				4	4	4	33.3	33.3	33.3	12.855	0	48.807	3598500000	57
27.2186	25.2337	25.7699	23.8362	25.793	26.8175	26.1417	26.549	26.1229	25.5094	25.474	25.6696	26.3171	25.9556	25.2565	24.8759	24.8495	26.4702	26.0468	26.0325	25.3768	25.7952	25.9553	24.8116	25.0542	25.3308	24.8326	25.2174	26.5173	24.086	24.6951	23.5407	22.1387	25.4946	25.8809	25.4492				5	5	5	43.2	43.2	43.2	13.757	0	282.28	2531200000	174
24.473	25.2071	25.7052	25.3205	25.4846	24.9871	25.0525	25.4159	24.7771	24.4096	24.7812	25.8275	25.9204	25.6983	25.6563	24.4857	24.5603	25.5136	25.6621	25.6139	25.0618	25.851	24.9616	25.2034	25.4581	25.4583	25.2482	25.6392	25.0065	25.748	24.6873	25.964	24.9932	25.3755	25.0806	25.7095				8	8	6	26.8	26.8	22.3	49.301	0	15.972	1674700000	139
24.287	25.1332	27.6205	NaN	NaN	26.8451	26.6529	26.8541	25.7529	27.0847	26.5232	26.834	26.5525	26.9384	28.2211	26.3912	25.6275	NaN	24.4233	27.3995	26.2375	26.8386	25.9307	25.4233	25.7267	21.8031	27.3155	28.0061	24.3298	27.6304	27.7713	25.8136	26.5955	25.9571	25.844	22.8323				9	9	7	39	39	32	39.183	0	323.31	4511500000	235
28.739	28.4249	28.0349	28.7014	28.4235	28.1726	28.0326	28.1037	27.7945	28.0869	27.7007	27.7525	27.6415	26.903	27.2979	27.7754	26.852	29.0794	28.7035	27.2328	28.2221	28.3337	28.3624	28.6316	28.4513	27.9453	26.1587	28.1943	28.3469	27.2646	27.2036	28.2041	27.2855	28.3657	27.6379	26.9281				5	5	5	58.8	58.8	58.8	12.774	0	323.31	11535000000	282
25.8591	26.9289	27.3651	26.9558	27.1505	27.4441	25.9064	26.8164	27.4921	27.4314	26.9247	27.0634	27.0966	28.1033	28.1504	26.5667	26.8846	26.9954	27.0863	27.8032	27.4907	27.0392	26.7329	26.5336	27.3709	27.6024	28.0331	27.6134	25.5575	27.8734	28.1553	27.0199	27.868	27.4484	27.4514	27.2576				47	43	40	32.4	31.1	29.4	275.66	0	323.31	6577300000	639
NaN	NaN	NaN	NaN	NaN	NaN	NaN	21.8058	21.2104	NaN	23.3639	NaN	23.9759	NaN	NaN	NaN	NaN	NaN	23.8299	NaN	NaN	NaN	NaN	NaN	NaN	NaN	21.1793	NaN	NaN	NaN	NaN	23.1789	23.4701	NaN	NaN	NaN				3	3	3	2.2	2.2	2.2	270.21	0.00026042	4.0457	96179000	8
21.0013	21.311	22.8628	22.4851	NaN	22.5957	22.4859	22.5689	22.3529	22.5838	22.8901	NaN	22.3484	22.3023	22.3153	22.5089	21.3105	22.6031	22.0641	22.2349	21.89	20.9209	22.5461	23.4114	21.8605	NaN	22.2114	23.3145	22.725	21.9724	21.6987	22.2179	22.4413	22.1637	23.0381	NaN				2	2	2	19.4	19.4	19.4	13.711	0	33.181	189120000	47
25.4794	26.2623	26.7698	25.4811	24.8399	25.9623	25.9864	26.218	25.5034	25.814	25.9796	25.2508	26.2194	25.5694	26.3009	27.2484	25.7642	25.4162	25.4749	26.6157	25.5409	25.4893	25.8126	26.0863	24.7377	24.6165	26.0446	26.4545	25.5356	26.3331	26.487	24.7384	25.6231	25.2799	26.0376	24.9992				12	12	12	44	44	44	51.712	0	129	2621000000	185
22.8885	22.7433	NaN	22.5801	NaN	21.8539	NaN	23.0327	20.4208	23.082	22.8494	22.4094	23.1682	23.2027	23.0832	23.533	NaN	23.0303	23.2249	21.8694	21.6022	23.1699	NaN	21.211	22.6875	22.6873	22.614	NaN	NaN	NaN	NaN	23.0525	22.5243	23.4671	22.6836	NaN				5	5	5	37	37	37	26.034	0	66.245	242380000	29
25.1187	26.621	26.7412	25.9478	25.0515	26.7567	26.685	26.5673	26.3378	26.1093	26.2924	26.6636	25.7799	26.5194	26.3917	26.7383	26.6688	25.5199	24.7884	26.9825	26.6136	26.4177	25.8091	24.6352	26.3791	25.9616	27.1159	26.3974	25.9388	26.8002	26.7295	26.066	26.5855	26.0639	26.2052	26.0227				5	5	5	33.5	33.5	33.5	24.593	0	323.31	4602300000	222
NaN	23.5116	NaN	24.2002	23.2661	22.7886	22.7195	22.0266	22.6637	23.3568	23.0198	23.5962	22.8761	23.2557	23.8569	22.7497	NaN	22.8548	NaN	23.8979	22.359	22.8301	23.1214	21.4209	23.1113	23.0909	24.0759	23.2774	NaN	23.7466	23.575	23.1788	22.7086	23.5432	22.4581	NaN				6	6	6	9.8	9.8	9.8	105.93	0	30.317	357770000	65
24.7016	23.452	24.5487	24.2119	25.4113	23.0193	NaN	NaN	23.6286	24.2356	22.7101	24.881	24.5473	23.8978	24.4413	23.9894	24.743	24.7269	25.167	23.8927	23.8038	23.0701	24.4825	24.8841	25.4735	26.3476	23.1307	24.4164	24.9155	24.4156	23.8408	25.3076	23.6277	24.82	23.4507	23.6381				8	8	8	22.8	22.8	22.8	73.449	0	185.99	872900000	72
24.6937	23.7349	24.9679	24.6361	23.896	24.4718	NaN	23.5053	23.3503	23.9555	24.0068	23.534	24.0896	24.0861	24.6899	23.1852	23.1765	23.6212	NaN	24.213	NaN	24.2291	23.2153	24.1615	22.5479	23.5503	24.0437	24.0307	23.5722	24.327	NaN	23.7411	23.837	24.1905	23.2836	23.8135				2	2	2	19	19	19	29.763	0	92.257	565050000	35
24.339	24.1541	24.8833	25.0317	24.8764	24.8631	25.1734	23.443	24.3114	24.646	24.3139	24.6514	24.5737	24.6802	25.1811	24.1468	23.6825	24.5839	25.4496	23.8775	24.5863	24.9852	24.6523	22.8204	24.2934	25.1124	25.109	23.4795	24.5963	24.793	25.3361	24.6173	24.4636	24.9919	23.564	25.2653				5	5	5	24.8	24.8	24.8	38.169	0	22.264	1114500000	173
NaN	25.8269	NaN	26.7318	25.2945	22.7985	25.8992	NaN	25.1213	24.397	24.651	24.7493	24.2552	NaN	NaN	25.0717	NaN	26.3724	NaN	25.4982	NaN	26.0061	NaN	25.2849	25.211	24.2706	NaN	26.2372	25.7311	23.806	NaN	25.0488	NaN	NaN	23.6144	NaN				2	2	2	32.8	32.8	32.8	6.9611	0	7.6324	1145800000	22
NaN	21.2616	22.3185	NaN	NaN	22.0939	22.39	21.34	21.5253	21.5798	22.5236	21.3608	21.8044	22.5437	21.4083	24.1416	24.3685	NaN	21.141	22.2195	22.0444	NaN	21.0213	21.467	21.2428	NaN	22.7156	22.1175	21.0427	22.6676	22.1425	NaN	22.0656	21.3913	22.0814	22.0108				4	4	4	16	16	16	54.366	0	82.153	206070000	47
NaN	21.7911	20.7992	21.3676	20.7163	20.8557	NaN	NaN	NaN	NaN	21.5264	NaN	NaN	NaN	NaN	22.529	20.6988	21.3427	21.6294	NaN	NaN	21.5855	NaN	NaN	NaN	NaN	NaN	NaN	20.3953	NaN	NaN	20.6747	20.9044	19.7842	NaN	22.87				3	3	3	4.1	4.1	4.1	108.94	0	5.419	66037000	12
NaN	21.2754	22.73	NaN	21.418	22.3122	NaN	22.3002	NaN	NaN	NaN	NaN	21.7502	NaN	23.8962	19.8501	20.8907	21.407	NaN	22.8759	NaN	22.557	NaN	22.4953	19.3572	NaN	NaN	23.7116	19.0869	NaN	22.9021	NaN	19.4167	21.277	NaN	NaN				3	3	3	12.8	12.8	12.8	37.267	0	42.748	103340000	20
26.8365	25.8894	26.9784	26.7015	26.1123	26.4837	26.4281	26.7671	25.6227	26.2554	26.3152	26.2707	26.5829	26.2357	26.3571	26.6588	26.2757	26.3209	26.2864	26.8536	26.4145	26.5513	26.1656	26.5116	25.5468	25.0635	26.4843	26.8073	26.2386	26.7381	26.5698	26.2008	26.1443	26.0269	26.6935	25.3248				11	11	11	48.5	48.5	48.5	30.241	0	239.24	3662600000	345
26.8561	28.1126	26.8482	26.6171	25.9748	25.457	26.3229	26.5072	26.0266	26.3704	26.0241	26.0367	25.9985	25.308	26.1733	25.9515	25.6533	26.5227	27.1135	26.3481	25.2406	25.3701	26.4811	26.7717	26.6378	26.3626	25.5671	26.7772	26.6085	25.957	25.6962	26.6865	25.7069	26.3987	26.3251	26.0874				4	4	4	30.3	30.3	30.3	20.117	0	28.36	3609000000	126
NaN	NaN	NaN	NaN	NaN	NaN	NaN	NaN	NaN	NaN	21.0797	NaN	NaN	NaN	NaN	23.5255	NaN	21.0926	NaN	NaN	NaN	NaN	NaN	22.0313	NaN	NaN	NaN	NaN	20.868	NaN	21.2621	NaN	NaN	NaN	22.0021	22.7703				3	3	3	64.5	64.5	64.5	8.5435	0	11.516	61857000	17
27.478	27.2953	27.1378	25.7406	26.2368	26.4592	25.6276	27.1635	26.3358	26.7174	26.368	26.1083	26.874	25.8944	26.924	27.4305	27.0137	26.1826	26.5754	26.6449	26.8984	26.9665	26.302	27.4734	26.5843	26.5204	25.677	27.1547	26.8508	25.9172	26.0433	26.7135	25.4681	26.5973	27.4168	26.008				3	3	3	48.3	48.3	48.3	10.058	0	129.42	6283600000	241
24.1758	25.3183	25.6575	24.7785	25.0713	25.068	24.9894	24.421	22.3441	25.3165	24.3537	25.017	24.4442	24.0711	26.3424	25.7136	26.3053	22.7462	24.4495	26.2181	24.7012	24.9768	25.2022	21.9171	25.4148	24.6098	25.9942	25.1552	24.7779	25.8338	25.8162	25.2254	24.9415	24.7661	25.007	22.4112				21	21	21	26.3	26.3	26.3	145.83	0	320.51	1635900000	206
22.1123	22.1219	23.3875	NaN	23.5937	23.1892	NaN	23.0158	NaN	23.1101	21.6065	22.5307	23.0344	22.7193	22.3378	NaN	22.1007	22.404	22.9334	22.9411	23.1324	22.6562	23.0015	22.8924	NaN	23.4109	23.1812	22.3239	23.0378	22.3389	23.1852	22.7488	22.9965	23.5111	23.4645	23.3725				3	3	3	5.5	5.5	5.5	85.746	0	323.31	267100000	49
23.572	22.9433	22.543	22.4227	22.0344	23.2082	22.8137	23.4343	NaN	NaN	NaN	NaN	22.4974	NaN	NaN	NaN	NaN	23.3458	22.6957	22.7804	21.3071	21.3292	22.1573	NaN	NaN	NaN	NaN	NaN	23.3935	NaN	NaN	NaN	NaN	21.3691	NaN	NaN				3	3	3	12.9	12.9	12.9	33.195	0.00027285	4.9611	138430000	26
NaN	NaN	NaN	NaN	NaN	21.1607	NaN	20.5939	NaN	NaN	NaN	21.42	NaN	NaN	20.8513	NaN	20.2097	NaN	NaN	21.4617	21.7325	21.4308	NaN	NaN	NaN	NaN	NaN	NaN	NaN	NaN	NaN	NaN	NaN	NaN	NaN	20.799				3	3	3	17	17	17	41.216	0	21.022	27584000	12
23.5407	24.5492	24.0483	23.1636	NaN	23.8597	NaN	23.5522	23.9545	23.9149	23.9231	23.4048	23.9515	24.0134	24.4266	23.9209	24.3936	22.0307	24.0431	23.8354	24.4385	24.5822	NaN	23.9761	24.1377	24.7854	24.1713	23.9815	23.8936	24.044	24.1268	23.8917	24.0021	24.197	24.9869	NaN				2	2	2	11.1	11.1	11.1	31.635	0	8.1484	593500000	51
NaN	NaN	NaN	NaN	NaN	20.1586	NaN	NaN	19.7983	19.657	NaN	NaN	21.1695	NaN	21.2183	NaN	22.5126	NaN	NaN	21.4533	NaN	21.3003	NaN	NaN	21.7069	22.3249	20.4485	NaN	21.2949	20.8362	21.6068	21.1508	NaN	NaN	NaN	NaN				6	6	6	2.4	2.4	2.4	513.25	0	19.089	53283000	20
NaN	21.4118	22.745	24.0629	22.4341	NaN	22.3361	NaN	26.9002	21.7434	25.1501	25.5493	21.4068	NaN	22.794	NaN	24.8081	NaN	23.0616	NaN	22.9625	23.6517	21.8715	NaN	23.5179	NaN	23.9828	22.4094	NaN	NaN	23.0223	23.2461	24.2154	23.7888	19.9519	27.978				3	3	3	27.6	27.6	27.6	21.731	0	111.89	604150000	42
23.9245	24.4961	23.9088	24.6905	25.1873	24.2101	24.476	23.3748	23.6725	23.9387	24.5575	24.1774	24.4163	23.7511	22.8284	23.0838	24.6649	23.5002	24.3949	23.4805	21.8128	24.0755	23.8674	24.4246	23.8301	23.3906	23.6772	23.2277	23.0271	22.9721	22.9432	24.3153	NaN	24.0067	23.5867	24.4147				2	2	2	20.8	20.8	20.8	19.343	0	89.136	663820000	86
25.4976	26.4407	25.2871	24.7973	25.0047	24.8141	25.3027	25.0477	25.0315	25.2661	24.9256	25.3094	25.0909	NaN	24.8356	26.0254	25.0771	25.3629	25.2497	24.925	25.5378	25.2816	23.4984	25.0497	25.0754	24.8231	24.6616	24.7343	24.5352	24.7329	24.54	25.6393	24.786	24.8962	24.7304	24.4874				4	4	4	34.6	34.6	34.6	22.875	0	37.548	1493700000	88
NaN	20.1693	NaN	NaN	NaN	NaN	NaN	NaN	NaN	20.2532	22.3108	20.5633	21.6207	NaN	19.9693	NaN	NaN	21.4835	NaN	19.9053	21.8907	NaN	NaN	NaN	NaN	NaN	21.1979	NaN	NaN	20.932	NaN	NaN	22.7371	NaN	21.1989	21.448				2	2	2	15.3	15.3	15.3	31.677	0.00026511	4.349	51982000	9
25.1798	26.2332	26.7457	26.1036	26.3574	25.9106	25.9042	25.7761	25.6948	26.4246	25.6823	26.5447	25.631	25.9179	26.9394	27.0076	26.8968	26.0219	25.9584	27.0514	26.2052	26.004	26.4878	25.6073	26.6375	26.3657	26.6768	26.5923	26.3376	26.7854	26.8344	26.4051	26.1838	26.6188	25.938	25.8355				40	40	40	27.1	27.1	27.1	244.5	0	323.31	3554600000	712
NaN	NaN	22.1254	21.6269	22.4384	19.4955	NaN	NaN	21.0586	NaN	20.8335	21.7574	NaN	NaN	NaN	NaN	NaN	NaN	21.2442	21.3062	NaN	21.1862	20.8949	NaN	23.1484	22.2479	21.3478	NaN	21.3762	21.5165	NaN	NaN	21.2007	NaN	23.32	23.0912				3	3	3	23.5	23.5	23.5	31.444	0	7.8677	70950000	17
NaN	NaN	NaN	NaN	NaN	20.8011	NaN	NaN	NaN	20.7604	NaN	20.1784	20.968	NaN	20.6734	NaN	NaN	NaN	NaN	21.2534	NaN	NaN	21.0926	NaN	21.4284	NaN	NaN	NaN	NaN	NaN	NaN	21.3562	NaN	21.8711	NaN	NaN				3	3	3	4	4	4	84.883	0.0067671	2.0403	34019000	9
24.0699	23.2356	23.5502	22.7864	22.9057	23.5482	23.8239	23.2254	23.6635	23.4997	23.0615	24.0122	23.6172	22.4216	23.2617	22.7354	NaN	23.9299	23.5983	23.2866	22.726	23.3188	24.0194	23.6847	23.362	24.2307	22.8128	23.4626	24.2743	23.0744	22.9144	23.7642	23.1768	23.1156	23.2056	23.8922				7	7	6	20.9	20.9	18.8	52.642	0	37.062	471970000	76
NaN	NaN	23.744	NaN	NaN	22.5749	22.7223	NaN	NaN	22.1898	22.7118	22.8958	22.0027	NaN	22.7899	NaN	21.6875	NaN	NaN	23.4292	22.3012	22.6057	NaN	NaN	NaN	NaN	23.9455	22.3582	NaN	23.682	23.7773	21.9522	21.8411	NaN	NaN	NaN				5	5	5	6.8	6.8	6.8	149.01	0	215.97	169610000	40
23.6445	22.698	NaN	NaN	22.3136	22.947	22.9855	21.7317	23.4942	21.0636	21.9911	21.5286	23.8135	22.9168	20.5953	21.0134	22.1292	22.8737	NaN	21.9771	NaN	22.4328	21.469	22.444	22.7166	23.5694	22.1556	22.1442	22.7598	21.3587	NaN	23.1522	23.2402	22.8507	23.0276	23.0622				4	4	4	16.9	16.9	16.9	39.641	0	16.058	256880000	54
NaN	NaN	NaN	22.4836	NaN	21.3123	NaN	NaN	23.6385	NaN	22.1558	22.4511	NaN	24.5105	NaN	NaN	24.0249	NaN	20.3652	20.8636	25.0569	NaN	NaN	NaN	NaN	NaN	25.1899	NaN	NaN	22.1043	21.8393	NaN	24.3501	21.4459	NaN	NaN				7	7	7	24.4	24.4	24.4	46.561	0	18.755	205380000	43
20.712	NaN	24.1648	NaN	NaN	22.547	22.9423	22.4158	20.3435	22.9703	23.322	22.5235	22.4305	22.2425	23.7769	23.486	22.8126	NaN	21.012	25.1664	22.5541	NaN	21.4653	NaN	NaN	22.2997	23.3169	23.3131	NaN	23.894	24.1578	NaN	23.5066	23.2828	22.7845	NaN				9	9	9	20.9	20.9	20.9	74.761	0	32.441	287890000	63
25.7422	24.9816	25.2971	24.2575	25.059	NaN	23.6738	25.4065	23.9578	24.5442	24.7198	25.3018	NaN	NaN	25.3959	23.3565	23.5393	25.5782	24.9705	25.7227	NaN	25.5617	25.5037	26.4894	24.2689	25.5451	23.4124	25.6637	25.7895	23.3386	23.6466	23.5003	24.7349	26.0908	NaN	22.6142				6	6	6	27.3	27.3	27.3	37.909	0	147.33	1172400000	84
23.5753	23.3936	22.4179	23.9946	24.4183	23.1255	NaN	23.8154	NaN	24.1831	23.181	23.3857	23.8126	NaN	22.3259	NaN	23.3193	23.82	25.1031	23.9285	NaN	24.7512	24.4905	NaN	23.4429	23.3276	NaN	24.5693	25.0034	23.9786	NaN	24.0978	24.1913	23.6992	24.2086	22.753				4	4	4	22.4	22.4	22.4	33.395	0	17.453	570150000	43
24.9546	25.6829	24.4917	25.6931	25.751	21.6312	25.0881	25.2889	25.1276	25.4183	24.6762	25.0307	25.3247	25.3797	25.3635	24.5625	23.7865	25.5547	25.1787	25.525	24.8683	25.6811	25.6615	25.9446	25.084	25.719	25.1373	25.5825	25.3166	23.9547	25.529	25.4642	25.212	25.0609	25.5933	25.7106				6	6	6	31.9	31.9	31.9	35.611	0	273.66	1585600000	114
23.6492	23.9593	NaN	23.6443	24.567	21.0501	23.6872	23.2947	23.1612	23.809	23.3612	23.9169	23.902	23.0597	22.8921	NaN	22.2475	23.8418	24.0487	23.2116	23.985	23.8804	24.1385	23.7209	24.0111	24.1755	23.288	23.2395	23.4112	23.3514	23.3521	24.1402	23.4709	23.9644	22.3217	24.6611				4	4	4	19.8	19.8	19.8	29.062	0	73.05	493550000	71
25.6706	NaN	23.0317	22.6519	NaN	22.0346	24.1398	23.8515	NaN	23.3403	24.0066	23.9121	23.715	23.9802	23.9882	23.094	NaN	24.3617	22.9665	22.7247	23.9162	24.1586	23.1623	23.4865	NaN	NaN	22.9258	23.5401	23.2717	23.0736	22.7165	24.2664	23.6228	24.1565	NaN	NaN				6	4	4	33.9	23.5	23.5	30.85	0	37.469	429300000	46
21.3863	NaN	22.6727	NaN	NaN	22.3546	NaN	NaN	NaN	22.3979	20.9418	21.0312	22.0192	NaN	21.9603	NaN	20.4668	22.1351	22.8785	22.473	NaN	NaN	21.9181	21.728	21.6395	22.2991	21.0615	22.0973	22.2857	21.5788	21.2761	21.9144	21.5	22.4299	NaN	NaN				3	3	3	5.4	5.4	5.4	87.116	0.00025988	4.0201	104070000	34
26.0702	25.2159	25.5862	26.3663	24.7867	26.5582	27.5233	26.8614	26.2122	25.2097	26.0084	25.8798	26.6492	27.0382	26.0678	25.4369	25.6161	26.4621	24.5714	26.8765	25.5216	24.7479	25.6932	25.1858	25.2567	23.1238	25.8175	25.2445	25.7819	25.7652	25.6082	25.3771	25.6906	25.5369	25.4618	24.4543				14	14	13	45.9	45.9	43.7	46.659	0	323.31	2605900000	214
NaN	NaN	NaN	NaN	NaN	NaN	NaN	NaN	22.372	NaN	NaN	NaN	21.0942	22.4268	22.1518	NaN	NaN	NaN	NaN	22.031	NaN	21.3966	NaN	NaN	NaN	NaN	21.3911	21.7395	21.0759	22.2193	21.7454	NaN	21.3355	NaN	21.9879	NaN				2	2	2	12.6	12.6	12.6	33.814	0	15.969	69588000	12
NaN	NaN	NaN	21.1999	NaN	22.5339	NaN	21.0416	21.8759	NaN	20.9599	21.0795	NaN	21.6878	20.2984	22.0479	23.0369	NaN	NaN	22.0862	NaN	NaN	NaN	NaN	20.4768	NaN	23.1124	19.522	NaN	21.2541	21.1105	NaN	21.7572	NaN	21.7352	NaN				3	3	3	9.3	9.3	9.3	58.255	0	323.31	73324000	22
NaN	NaN	NaN	NaN	NaN	NaN	NaN	NaN	NaN	NaN	NaN	NaN	NaN	NaN	22.0616	NaN	NaN	NaN	NaN	21.3447	NaN	NaN	NaN	NaN	NaN	NaN	NaN	NaN	NaN	NaN	NaN	NaN	NaN	NaN	NaN	NaN				2	2	2	9.3	9.3	9.3	40.787	0.0095359	1.7912	8812900	3
25.6917	26.7083	26.792	26.474	26.6911	26.3623	26.5135	26.76	25.2439	26.1264	26.6773	27.386	26.6539	26.2103	26.1145	26.3952	26.2754	26.5273	26.1177	26.5872	26.8751	26.6106	25.9488	25.8321	26.3966	27.0822	26.6344	26.6155	25.902	27.0338	26.7548	26.2689	26.767	26.4441	26.6127	26.4001				4	4	4	21.3	21.3	21.3	21.614	0	278	5466900000	302
22.3756	21.9325	22.681	22.6368	NaN	23.662	24.3471	23.052	24.5666	NaN	23.1087	22.7983	23.6058	24.6922	22.3893	22.5048	22.1751	23.1897	23.5331	23.9519	NaN	NaN	NaN	NaN	NaN	NaN	22.6784	NaN	22.8331	20.988	22.4625	21.4363	NaN	21.713	NaN	23.973				12	12	12	9.4	9.4	9.4	222.31	0	21.888	275490000	52
22.1101	22.9167	23.2518	22.9687	22.9452	22.0336	NaN	21.1765	21.2512	21.6003	NaN	21.7389	NaN	21.6647	21.8538	21.4247	20.8717	22.433	23.479	21.7315	NaN	23.0108	22.0325	22.6194	22.233	22.4459	NaN	NaN	22.0822	21.944	NaN	22.0047	21.1946	22.6703	21.0843	NaN				3	3	3	7.8	7.8	7.8	72.203	0	5.9804	158520000	32
26.2094	25.4896	25.5705	26.139	25.1359	25.2187	25.9377	25.2722	25.1525	25.7602	25.6543	25.7254	25.1243	NaN	26.0177	24.817	NaN	25.5088	26.1967	25.8994	24.6427	24.7479	26.043	26.1985	26.8236	26.285	25.4819	25.7481	25.8707	25.7047	25.7192	26.1822	25.602	26.2688	25.2818	25.7048				3	3	3	23.6	23.6	23.6	26.131	0	323.31	2042300000	53
24.1723	NaN	25.7429	24.2425	NaN	25.1776	NaN	24.7004	24.3113	25.3292	24.4454	24.9852	22.8518	24.4988	26.3417	NaN	NaN	NaN	NaN	24.7249	24.1199	24.8054	24.5419	24.9703	24.5502	NaN	24.5345	24.9027	24.4009	25.2862	NaN	24.8788	24.3907	24.9478	NaN	NaN				3	3	3	28.5	28.5	28.5	29.841	0	25.496	739480000	41
23.8708	22.8831	24.7127	23.03	22.9318	24.0976	24.161	24.561	23.5399	23.6786	24.1875	23.8275	24.3646	23.3648	24.6912	23.6866	23.7468	23.3361	23.3566	24.7415	23.9285	23.4748	23.4956	24.0042	NaN	22.7038	24.1195	24.4638	23.2187	24.0376	24.3784	23.1433	24.4587	22.0411	24.3061	23.0686				4	4	4	48.2	48.2	48.2	15.773	0	11.379	651150000	78
23.5745	24.2118	24.6726	24.6987	25.2936	22.6792	25.2711	24.1735	24.3603	25.2237	24.2399	24.6922	23.7886	23.4541	24.5646	24.0379	24.5624	24.9709	23.2953	24.789	24.4425	24.4809	24.2104	24.0383	24.2028	24.314	24.7617	24.5333	23.5914	24.5173	24.9	25.1974	24.9778	24.4064	23.3672	23.5784				9	9	9	31.6	31.6	31.6	47.355	0	189.33	957180000	119
NaN	NaN	NaN	NaN	NaN	NaN	NaN	NaN	NaN	NaN	NaN	NaN	NaN	NaN	NaN	NaN	NaN	NaN	NaN	NaN	19.4625	NaN	NaN	NaN	NaN	NaN	NaN	NaN	NaN	NaN	NaN	NaN	NaN	NaN	NaN	NaN				2	2	2	1.5	1.5	1.5	329.39	0.00050378	3.5041	34037000	6
24.3159	23.4574	24.8542	24.1331	NaN	NaN	24.2344	NaN	23.332	23.6583	24.254	23.5192	24.2407	NaN	24.5731	23.5358	NaN	NaN	NaN	24.6235	NaN	24.0566	23.6303	NaN	23.2764	23.1726	23.3752	24.366	23.6143	24.25	24.0288	23.3521	23.7104	23.6758	NaN	NaN				3	3	3	28.2	28.2	28.2	11.428	0.0068192	2.1065	449530000	22
24.054	23.8628	23.2164	23.316	24.1591	23.297	24.0138	23.8944	23.893	24.821	23.5706	24.0202	23.9824	NaN	22.9284	23.4983	23.8792	24.1156	23.6525	23.0357	24.3305	23.9334	23.9741	23.5702	23.4473	23.7928	23.3742	24.672	23.6138	23.675	22.8301	23.6128	23.1957	23.996	23.1964	23.0252				6	6	6	43.4	43.4	43.4	41.595	0	37.021	618340000	80
26.6999	25.0279	25.6309	25.5582	25.3028	26.4898	25.231	25.3641	25.0863	26.2333	24.9638	24.8015	26.1795	25.8301	26.6231	24.5523	25.4577	25.4924	25.2635	26.2685	26.3243	25.7517	25.9566	26.7025	26.2315	25.9835	25.4153	25.8146	25.3198	26.0262	25.8318	26.6189	25.0181	26.1619	26.2608	25.9182				6	6	6	26.9	26.9	26.9	37.432	0	323.31	2333300000	66
NaN	NaN	23.5261	NaN	NaN	23.0481	22.4195	22.174	21.6663	23.0975	23.3677	23.3836	22.7488	22.2412	23.3608	22.3615	24.3634	NaN	NaN	24.0175	23.4536	23.0738	NaN	NaN	22.062	NaN	24.359	22.8788	20.0065	23.233	23.7889	21.5268	22.5988	21.9923	22.9428	NaN				6	6	6	17.8	17.8	17.8	54.972	0	103.24	277810000	57
NaN	24.1448	23.2856	NaN	NaN	NaN	NaN	NaN	NaN	NaN	NaN	NaN	NaN	NaN	NaN	24.0946	NaN	24.4719	21.9675	NaN	NaN	NaN	NaN	NaN	23.5339	24.4333	NaN	NaN	NaN	NaN	NaN	NaN	NaN	NaN	NaN	NaN				2	2	2	22.8	22.8	22.8	13.331	0	34.106	158620000	6
23.0919	22.1887	22.5775	22.5284	NaN	NaN	22.7295	22.6058	NaN	NaN	22.7578	22.6048	NaN	21.4983	22.0331	NaN	NaN	22.4363	22.7234	22.654	22.4459	22.625	23.1175	21.864	NaN	NaN	22.8241	22.3544	23.1092	22.182	NaN	22.6289	22.3925	22.7597	NaN	NaN				3	3	3	15.3	15.3	15.3	37.84	0	25.561	164710000	28
22.5223	22.6209	23.6623	22.1206	NaN	23.4104	23.5419	22.7943	22.8611	23.1404	23.4723	23.4762	23.545	22.8993	24.4763	22.6127	23.0165	23.2911	23.2915	24.2234	23.836	21.2001	22.9583	23.2988	23.0567	23.2192	24.7595	23.4151	22.4575	23.2466	24.8462	23.3699	23.734	23.2224	21.8211	22.6336				7	7	7	15.9	15.9	15.9	74.605	0	157.65	462360000	99
NaN	NaN	21.5563	NaN	NaN	21.5541	21.1258	NaN	20.9735	NaN	20.938	21.0605	21.0851	NaN	NaN	20.8226	NaN	21.1165	NaN	21.6524	NaN	21.418	21.0735	20.7393	NaN	NaN	21.4265	21.6159	19.745	21.3197	21.0017	NaN	20.8808	21.2622	NaN	NaN				3	3	3	16.2	16.2	16.2	34.624	0	10.809	56241000	33
21.7925	23.2922	23.6323	22.8601	23.0513	21.1381	22.4109	22.5683	21.3215	22.7189	22.1422	22.8562	21.9366	21.3116	23.3798	25.0661	22.7115	22.4883	24.0817	23.0259	22.6584	23.2898	23.4083	23.6955	23.0032	NaN	22.3708	22.8546	23.0865	22.3602	22.331	23.3306	22.0338	22.9215	21.0647	21.3749				3	3	3	12.4	12.4	12.4	42.344	0	57.292	338150000	62
24.0631	23.8641	25.4736	25.3973	25.2264	24.65	24.6655	24.5559	24.0267	25.2279	24.2219	24.9874	24.3427	23.4248	25.2493	23.6326	23.7191	24.7152	24.8781	25.4332	24.4269	24.5462	25.0748	24.991	25.3477	25.0178	24.739	25.1862	25.4851	25.1236	25.0255	25.3247	24.3348	25.0721	24.1794	24.4013				7	7	6	13.6	13.6	12.1	75.022	0	183.43	1180800000	145
24.5181	24.4809	25.5331	25.5047	25.254	25.0881	25.2678	25.6544	24.4075	25.3589	24.5306	25.0708	25.28	24.2987	25.0448	24.5521	24.1554	25.216	25.4414	25.564	24.8595	25.4967	25.3757	25.3174	25.404	25.2475	24.9166	25.1223	25.5276	25.2272	25.2757	25.5699	25.1157	25.3162	24.8333	24.9154				7	7	7	12.6	12.6	12.6	112.13	0	323.31	1614800000	147
NaN	NaN	NaN	NaN	NaN	NaN	NaN	NaN	22.065	NaN	NaN	NaN	NaN	NaN	NaN	NaN	NaN	NaN	NaN	20.3237	21.6145	NaN	NaN	NaN	NaN	NaN	23.9974	NaN	NaN	21.0799	NaN	NaN	22.9498	NaN	NaN	NaN				11	7	7	22	14.2	14.2	76.93	0	7.2624	39873000	8
22.5854	23.0295	22.057	23.7099	23.238	22.6497	NaN	21.9041	22.1485	21.657	NaN	21.9689	NaN	NaN	21.3042	NaN	21.6617	22.5775	22.1735	21.141	21.7337	NaN	21.1079	22.5289	NaN	22.5579	21.8518	22.1153	NaN	21.8889	22.0094	21.4656	NaN	22.2159	21.4156	22.4916				6	6	6	15.6	15.6	15.6	65.719	0	14.545	148840000	35
23.2961	NaN	24.7349	23.2561	24.34	23.7932	23.3423	23.2233	21.9302	23.4922	24.2992	25.1099	NaN	23.5919	23.6121	23.7935	22.4403	24.1635	24.301	24.7815	24.6771	23.2884	22.8858	23.2512	23.1435	NaN	23.9226	23.8125	22.7459	24.4166	24.7147	23.6168	24.7947	23.8818	23.9117	NaN				5	5	5	17.9	17.9	17.9	67.454	0	176.71	610870000	69
NaN	NaN	NaN	NaN	NaN	NaN	NaN	NaN	NaN	20.49	20.5049	NaN	NaN	NaN	NaN	NaN	NaN	NaN	NaN	NaN	21.6762	NaN	NaN	NaN	NaN	NaN	NaN	NaN	NaN	22.4493	21.8268	NaN	21.7319	NaN	NaN	NaN				5	4	4	6	5.1	5.1	116.2	0.00025981	4.0152	30735000	10
21.1212	NaN	NaN	21.5361	NaN	20.8294	NaN	NaN	NaN	NaN	20.7014	21.5183	22.6254	22.6144	NaN	20.9148	NaN	NaN	NaN	21.8407	22.0237	NaN	NaN	NaN	NaN	NaN	NaN	NaN	NaN	NaN	22.2674	21.3672	23.3196	NaN	23.276	NaN				4	4	4	4	4	4	113.01	0.00026364	4.2699	76038000	13
NaN	NaN	23.4599	NaN	21.7862	22.7574	22.2067	22.2425	22.7904	22.4413	22.3635	22.5167	22.6849	22.0051	21.967	25.7896	24.6626	22.7134	22.639	24.2909	22.5443	23.2079	21.5547	22.364	23.9724	22.7211	23.5065	22.8872	21.2101	23.9188	22.321	22.3712	22.8539	21.8301	23.0442	22.3834				8	8	8	15	15	15	89.594	0	85.717	414510000	62
23.5709	22.4015	24.0636	NaN	22.3518	22.8246	23.0768	NaN	20.6405	22.669	23.2475	22.8197	22.0852	NaN	22.1596	21.7099	22.0726	NaN	NaN	21.6042	22.4641	22.6663	22.1746	22.2177	22.3267	22.063	NaN	22.9204	21.8622	22.2644	22.3504	22.6393	20.4486	24.6637	22.3186	NaN				4	4	4	11.2	11.2	11.2	54.862	0	10.314	213990000	58
22.4465	24.1914	23.2408	23.4947	23.5466	22.8105	22.7749	23.1305	23.1624	23.2855	22.3956	22.9929	22.913	NaN	23.6588	23.7128	23.766	23.3655	23.5247	23.1892	22.9692	23.7217	23.2631	23.8493	23.4196	23.308	22.9441	23.465	23.4276	22.693	22.6848	23.6175	22.7826	23.0189	22.0271	22.8723				4	4	4	17.8	17.8	17.8	30.344	0	323.31	418310000	80
20.8035	NaN	21.2948	20.8585	21.3506	NaN	NaN	NaN	21.5794	21.8381	21.7024	21.6922	21.844	NaN	21.7165	22.8042	NaN	NaN	NaN	22.3191	21.5597	NaN	21.6567	NaN	21.8922	NaN	22.2783	21.6796	NaN	22.0824	21.5555	21.8542	21.9333	21.5541	NaN	NaN				5	5	5	7.2	7.2	7.2	102.43	0	43.594	99364000	40
NaN	21.1564	22.6215	20.8158	21.6244	NaN	NaN	20.4885	NaN	22.5511	20.464	20.9516	21.3185	NaN	20.8467	NaN	21.3582	21.381	20.6364	21.3427	20.8651	NaN	NaN	NaN	21.0271	22.076	21.0817	21.3537	NaN	21.1005	21.7886	21.4222	NaN	21.5451	NaN	21.8152				6	6	6	3.5	3.5	3.5	339.59	0	6.3931	76987000	44
NaN	NaN	NaN	NaN	NaN	NaN	NaN	NaN	NaN	NaN	NaN	NaN	NaN	NaN	21.7295	NaN	NaN	NaN	NaN	NaN	NaN	NaN	NaN	NaN	NaN	NaN	NaN	21.9965	NaN	NaN	NaN	NaN	NaN	NaN	NaN	NaN				4	4	4	12.4	12.4	12.4	55.016	0.0025653	2.583	27244000	5
NaN	NaN	NaN	NaN	NaN	21.9926	NaN	NaN	NaN	NaN	NaN	NaN	NaN	23.3067	NaN	NaN	NaN	NaN	NaN	NaN	NaN	NaN	NaN	NaN	NaN	NaN	NaN	NaN	NaN	NaN	NaN	NaN	NaN	22.2886	NaN	NaN				2	2	2	6.4	6.4	6.4	52.488	0	9.3132	18023000	3
25.3708	25.8974	25.8247	25.4125	25.215	26.1786	26.5188	25.7266	26.3501	25.6329	26.342	25.5696	26.0361	27.452	26.3842	25.5039	25.456	25.7108	25.3088	26.3001	26.1663	25.6351	24.9675	24.8988	25.9222	25.3503	26.6387	25.6709	23.9897	25.9612	25.9566	25.5325	26.2785	26.0884	26.375	25.4005				23	23	18	40.1	40.1	32.6	103.96	0	268.1	2581100000	283
24.4588	25.0045	25.635	23.9252	25.2241	25.137	24.5159	24.7893	25.2796	24.8259	25.3379	24.8479	24.7006	25.5099	25.1613	23.1742	26.4006	24.3059	24.8694	25.2704	26.2123	25.4439	24.5598	24.3138	24.6678	24.4687	26.1888	24.9001	24.7151	25.4224	24.8275	24.0874	25.6359	25.0835	25.0591	25.0653				9	9	9	17.3	17.3	17.3	105.75	0	323.31	1509800000	176
NaN	NaN	NaN	NaN	NaN	NaN	NaN	NaN	NaN	22.3677	23.5107	NaN	NaN	NaN	22.9466	NaN	NaN	NaN	NaN	NaN	NaN	NaN	NaN	NaN	NaN	NaN	22.0216	NaN	NaN	22.2318	22.3377	22.5201	22.7432	NaN	NaN	NaN				7	7	7	4.2	4.2	4.2	309.22	0	12.117	87285000	10
23.4326	24.2688	23.7201	23.4473	24.6969	NaN	23.7027	23.3218	NaN	23.8465	23.5356	23.7125	23.1609	NaN	23.4391	23.301	22.5025	23.9729	24.0373	23.2792	NaN	23.9066	23.2471	24.2762	23.9656	22.037	23.4717	23.856	24.0281	23.1256	23.3176	24.0274	23.6675	23.4706	23.1305	23.0956				5	5	4	9.5	9.5	8.5	125.87	0	23.785	479860000	59
21.4085	21.1381	21.4862	21.1799	21.7009	NaN	NaN	NaN	20.8532	21.1611	NaN	21.5014	NaN	NaN	NaN	NaN	NaN	21.9411	19.9154	NaN	21.3305	21.7928	21.4048	NaN	19.5289	21.7639	21.7497	21.1389	NaN	NaN	NaN	21.3511	NaN	NaN	20.1497	NaN				2	2	2	2.6	2.6	2.6	133.27	0	6.158	57074000	21
NaN	NaN	22.5386	22.1156	22.0678	NaN	NaN	NaN	NaN	NaN	NaN	NaN	NaN	NaN	21.3388	NaN	NaN	NaN	21.8283	21.7183	NaN	22.1783	NaN	NaN	22.2083	22.4737	NaN	NaN	NaN	NaN	NaN	21.956	NaN	NaN	21.7655	22.0124				5	5	5	5.6	5.6	5.6	150.25	0	8.7069	60462000	14
NaN	20.3944	NaN	NaN	NaN	NaN	20.7661	NaN	NaN	NaN	NaN	NaN	NaN	NaN	NaN	NaN	NaN	NaN	NaN	NaN	NaN	NaN	NaN	NaN	NaN	NaN	NaN	NaN	NaN	NaN	NaN	NaN	NaN	NaN	NaN	NaN				4	4	4	34.2	34.2	34.2	13.157	0.0075807	1.961	14131000	3
24.3939	24.041	26.0145	24.7707	24.2263	25.0247	24.8664	24.0072	23.7083	24.0058	24.3665	24.4461	24.2463	25.0457	25.2288	24.2116	24.8688	24.6685	25.1643	25.3127	24.6258	24.4109	24.3294	24.8774	23.2102	22.6814	24.647	25.3378	24.3356	25.4398	24.8406	24.0992	24.5896	24.6161	23.8481	NaN				2	2	2	23.3	23.3	23.3	14.026	0	30.701	1126500000	71
NaN	NaN	22.8763	NaN	NaN	NaN	22.4276	21.8992	NaN	NaN	21.8173	22.0251	21.9148	NaN	23.1083	NaN	21.0473	NaN	NaN	23.3836	NaN	NaN	21.9819	NaN	NaN	NaN	22.6959	22.4735	21.6214	23.6192	23.0525	NaN	22.1733	NaN	NaN	NaN				3	3	3	25.8	25.8	25.8	18.479	0	6.2424	115080000	20
24.4096	NaN	NaN	NaN	21.5295	22.6552	23.8978	24.6998	NaN	20.6329	22.4256	NaN	24.3941	NaN	NaN	20.3044	NaN	24.7084	NaN	NaN	NaN	NaN	22.8669	22.4877	NaN	NaN	NaN	NaN	23.5929	NaN	NaN	21.9379	NaN	21.7478	NaN	NaN				2	2	2	17.2	17.2	17.2	12.805	0	129.76	231900000	15
NaN	NaN	22.9246	NaN	NaN	NaN	NaN	NaN	22.3963	21.434	22.3777	21.9013	21.8482	22.1226	22.46	22.5327	NaN	NaN	NaN	22.1556	NaN	NaN	NaN	NaN	NaN	NaN	22.3686	21.6851	NaN	22.6786	22.5113	NaN	21.7596	NaN	NaN	NaN				6	6	6	14.2	14.2	14.2	83.353	0	45.299	97497000	23
NaN	NaN	NaN	21.053	21.3964	20.989	20.5821	20.3179	21.4865	NaN	NaN	NaN	NaN	NaN	NaN	21.3386	22.1703	NaN	20.5003	NaN	NaN	NaN	NaN	NaN	NaN	20.6153	NaN	NaN	21.1423	21.1351	20.4607	NaN	NaN	NaN	NaN	NaN				2	2	2	7.1	7.1	7.1	51.908	0.00027427	5.0586	40443000	24
23.7039	23.4728	24.4268	24.0272	25.0056	24.0929	23.4857	23.7826	23.2801	24.0669	23.3627	25.1126	23.3742	23.2239	23.4501	24.5958	24.9525	23.3639	23.9195	23.8584	26.3392	24.8753	24.2116	24.0192	23.9203	24.3389	23.7297	24.1661	23.8235	24.1294	23.8412	24.1552	23.4869	24.4751	23.2247	24.0901				5	5	5	16.4	16.4	16.4	51.466	0	104.51	1064300000	117
25.1794	NaN	NaN	22.756	23.2598	24.8668	22.9191	24.5847	NaN	22.3705	22.7668	NaN	23.6026	20.3782	22.7999	NaN	NaN	25.1035	22.4669	24.2235	NaN	NaN	23.7962	24.4063	23.075	NaN	21.3002	22.0275	26.8876	NaN	22.1383	21.5234	NaN	21.7169	NaN	22.939				7	7	7	28.9	28.9	28.9	44.278	0	163.25	452530000	44
NaN	23.4629	23.5427	21.2165	23.9263	NaN	NaN	NaN	NaN	22.5285	21.9621	22.3815	21.6502	NaN	NaN	21.0802	NaN	NaN	23.4487	24.6447	NaN	23.5633	NaN	NaN	24.6262	24.0129	22.0597	21.6709	22.944	22.7004	23.4051	23.2509	21.938	22.9289	NaN	NaN				14	14	14	12.9	12.9	12.9	208.44	0	28.611	214880000	53
NaN	NaN	NaN	23.9886	NaN	23.8497	NaN	NaN	23.3109	22.605	NaN	NaN	23.8749	22.9662	22.9719	NaN	NaN	NaN	NaN	NaN	23.0051	NaN	NaN	23.6883	NaN	NaN	23.146	23.2128	NaN	22.7545	23.6234	NaN	NaN	NaN	NaN	NaN				3	3	3	11.2	11.2	11.2	28.612	0	6.4188	156970000	24
NaN	NaN	NaN	NaN	NaN	NaN	NaN	23.228	NaN	NaN	NaN	NaN	NaN	NaN	NaN	NaN	NaN	NaN	NaN	NaN	NaN	NaN	NaN	NaN	NaN	NaN	NaN	NaN	NaN	NaN	NaN	NaN	NaN	NaN	NaN	NaN				2	2	2	5.2	5.2	5.2	86.624	0.0083637	1.8948	9297400	1
25.3945	25.0809	25.4171	25.6635	25.3956	25.4539	25.7317	25.5551	26.2026	25.1984	25.5908	24.9077	25.0332	25.5085	24.8811	24.83	24.7606	25.7813	25.5677	25.3194	25.377	25.1646	24.7443	25.515	24.775	23.77	25.116	25.2284	25.2207	25.2266	25.1023	24.9461	24.7041	24.9156	25.0065	25.0731				3	3	2	17.3	17.3	12.3	27.228	0	97.914	1544900000	77
27.2347	26.6878	26.7739	27.4802	26.7837	26.2168	26.9472	26.5938	26.1157	26.7075	26.0941	26.1735	26.5525	26.4666	26.03	26.4333	25.5437	27.0684	27.4585	25.5432	26.577	26.7867	26.77	27.045	26.4348	26.9429	24.8511	26.8309	26.987	25.7323	25.7255	26.7732	25.6698	26.6013	26.0121	26.0227				6	6	6	72.1	72.1	72.1	14.874	0	323.31	3919200000	149
NaN	NaN	NaN	21.5044	20.8179	23.1613	22.5988	23.2485	22.0982	23.2227	23.1985	22.8639	23.3769	21.6002	24.1211	24.7287	24.916	NaN	22.0516	25.065	22.4053	22.1938	NaN	22.7215	23.5374	NaN	23.9392	23.9303	21.3554	24.4082	24.1628	21.7782	23.4359	NaN	23.2093	NaN				5	5	5	24.8	24.8	24.8	40.75	0	226.05	455770000	52
NaN	22.9295	NaN	NaN	NaN	NaN	NaN	NaN	24.356	21.7073	22.6718	NaN	NaN	24.6885	NaN	21.3646	23.9758	NaN	NaN	20.8664	24.1886	NaN	NaN	NaN	22.6469	NaN	23.1484	21.0774	21.1257	22.4349	23.472	NaN	24.0866	NaN	21.653	NaN				5	5	5	11.1	11.1	11.1	69.154	0	12.391	191810000	13
24.4656	24.5941	25.0438	25.1627	24.4548	23.969	24.7356	24.5177	NaN	24.6268	24.2121	24.7437	24.4909	23.6855	24.9389	23.8776	23.7636	24.701	24.8851	24.7011	23.8732	24.3191	24.6129	25.2392	24.4917	24.015	23.6163	24.7607	24.2314	24.6669	24.6034	25.1011	24.0768	24.7072	22.8761	23.5249				7	7	6	19.3	19.3	17.2	52.054	0	95.181	1000800000	84
28.9754	28.9197	28.3594	28.6649	28.6206	28.5978	28.9181	28.4387	28.8681	28.5534	28.6135	28.513	29.0695	28.4627	28.0393	28.4553	28.5368	29.2674	29.0773	28.0808	29.0986	28.8565	28.6345	28.7918	28.177	28.7258	27.6168	28.6122	29.2469	27.8177	28.0452	28.8258	28.1583	28.6302	28.1223	28.0828				12	12	12	78.7	78.7	78.7	27.547	0	323.31	17029000000	489
21.1175	NaN	NaN	NaN	22.6666	22.4004	24.4121	NaN	23.1094	22.7513	22.5739	23.157	NaN	23.277	21.603	21.7649	24.1462	NaN	NaN	22.449	23.8596	NaN	21.7071	NaN	21.7735	NaN	24.0872	NaN	21.1013	22.7265	NaN	21.9796	23.0664	22.657	NaN	NaN				7	7	6	19.1	19.1	16.8	69.5	0	93.515	200540000	27
23.1544	24.0642	22.8461	21.6458	23.1969	23.691	23.1932	25.3176	22.3376	23.3913	23.5769	24.0853	23.6209	23.1273	22.9961	24.5819	25.0532	23.3554	22.919	24.9996	24.1139	20.9466	22.8695	21.9867	23.9885	25.1549	23.1834	22.4169	23.3857	22.6381	23.4904	23.0618	23.9178	23.1405	23.2114	23.3843				14	14	14	32.9	32.9	32.9	68.617	0	191.84	567590000	102
21.3319	20.9398	NaN	NaN	NaN	NaN	NaN	NaN	NaN	20.526	21.1782	NaN	21.5506	NaN	NaN	NaN	NaN	NaN	NaN	NaN	NaN	21.0851	NaN	21.9468	NaN	NaN	NaN	NaN	21.8886	20.7828	20.8645	NaN	NaN	NaN	NaN	NaN				2	2	2	7.2	7.2	7.2	61.438	0.0002748	5.0969	56577000	10
23.0327	24.0244	24.6115	23.9044	24.2324	23.6396	24.0735	23.8686	22.564	24.0965	23.5051	NaN	24.2053	23.7787	23.8181	22.8166	22.8458	23.2667	24.3207	24.3125	NaN	24.2611	23.8625	25.1304	23.324	22.7202	23.585	23.7411	24.5104	23.4786	23.5524	24.2495	23.7456	24.0408	24.7715	23.4519				3	3	3	22.5	22.5	22.5	24.737	0	29.846	683120000	68
25.4925	25.6316	25.1834	26.0192	25.8712	25.2861	25.0624	25.1838	24.9266	25.4317	24.9876	25.6568	25.4541	25.3124	24.8555	25.671	25.0348	25.0131	25.3888	25.0785	25.5557	25.5314	25.2681	25.0823	25.1586	25.597	25.42	25.023	25.2891	25.2797	24.7642	25.3758	25.7009	25.2841	26.0561	26.0775				16	16	15	24	24	23	119.52	0	323.31	1874800000	234
25.1897	24.544	25.4792	24.0259	25.2749	24.938	24.583	25.5836	24.6809	26.1673	23.2349	25.2984	25.5453	23.66	24.7859	27.6112	26.3578	23.4266	25.4314	25.0937	27.0843	24.8312	24.7267	25.0772	25.3588	26.1596	24.0106	25.0827	25.3444	23.0153	24.3027	25.5774	24.0748	23.5989	25.2365	25.2022				2	2	2	19.7	19.7	19.7	23.003	0	323.31	2692400000	104
NaN	NaN	NaN	21.4804	21.3794	NaN	NaN	NaN	22.1338	NaN	20.7257	20.7696	21.1418	21.7464	20.169	23.1086	23.2363	NaN	NaN	NaN	22.3248	NaN	NaN	NaN	NaN	NaN	23.0343	NaN	NaN	NaN	NaN	19.8202	21.5393	NaN	NaN	NaN				4	4	4	14.6	14.6	14.6	59.851	0	8.2237	85454000	21
NaN	20.81	NaN	NaN	NaN	NaN	NaN	NaN	NaN	NaN	NaN	21.3032	NaN	NaN	NaN	NaN	NaN	NaN	NaN	NaN	NaN	NaN	NaN	NaN	NaN	NaN	NaN	NaN	20.9282	20.9177	NaN	21.0857	NaN	20.5399	NaN	NaN				4	4	4	14.1	14.1	14.1	49.669	0	6.2625	19499000	8
NaN	NaN	21.7746	22.0553	22.0458	NaN	NaN	21.3165	20.5586	21.3469	NaN	21.8072	NaN	NaN	NaN	19.5656	NaN	NaN	NaN	21.2429	22.0169	21.9806	NaN	21.9713	NaN	NaN	21.0767	21.5766	21.4124	21.5808	21.5036	21.4331	21.3586	NaN	19.9288	20.3134				3	3	3	15.8	15.8	15.8	37.646	0	32.836	63034000	22
NaN	NaN	NaN	NaN	NaN	21.5805	NaN	NaN	NaN	NaN	NaN	20.3899	NaN	NaN	NaN	NaN	NaN	NaN	NaN	NaN	23.4359	NaN	NaN	NaN	NaN	NaN	NaN	20.0934	NaN	22.2857	21.6768	NaN	NaN	NaN	NaN	NaN				3	3	3	6.6	6.6	6.6	119.21	0	7.614	33117000	8
23.5152	23.7813	24.1682	24.948	25.1097	25.0482	25.3596	25.4487	24.3512	23.5556	25.0848	25.7002	25.794	24.4906	25.1902	23.7351	22.754	25.1968	24.8563	25.0403	24.8197	24.9785	25.3381	25.1359	24.9102	24.7438	24.9605	24.8312	24.8748	24.8311	25.303	23.7177	24.8368	23.8179	25.4528	25.6288				4	4	4	19.8	19.8	19.8	32.339	0	21.038	1233500000	64
22.7453	23.2394	22.508	22.8764	23.2445	22.7781	21.9271	22.2191	21.6597	NaN	21.7574	NaN	22.6396	22.4608	22.6443	21.0248	21.5831	23.2188	23.3798	22.3244	22.1109	23.1108	22.5591	22.7571	22.6481	22.7295	22.071	22.1315	22.3372	NaN	22.2174	22.9248	22.3514	22.8208	22.2039	22.2708				3	3	3	15	15	15	30.288	0	77.056	220010000	58
24.5838	25.5048	25.5366	25.3301	25.7064	24.6507	23.6012	25.1557	25.2412	25.462	24.7472	25.8379	24.7157	24.5995	25.2002	27.2575	25.6674	24.9147	25.5053	25.0169	25.3877	25.3403	25.266	25.2273	25.8334	26.5663	25.5047	25.2113	25.2769	25.4035	25.1893	26.0003	25.3	25.2428	25.0615	25.75				12	12	11	16	16	16	122.41	0	275.88	1997600000	252
NaN	NaN	22.3825	22.8768	NaN	22.9606	22.6471	23.1108	23.0884	22.6894	23.7585	23.8104	23.009	23.5945	23.4092	23.4192	23.1838	NaN	NaN	24.8559	23.7302	22.0907	NaN	NaN	22.5108	20.0381	24.9219	22.729	NaN	23.8489	22.5151	21.819	23.324	22.8402	22.8112	21.1269				6	6	6	17.3	17.3	17.3	63.523	0	126.79	315260000	55
23.1027	24.1275	24.6534	23.8977	24.0242	24.6293	23.9554	23.7799	24.0748	24.1999	24.24	24.0868	23.46	23.752	23.6725	23.8488	23.8469	23.6299	23.8147	24.4229	24.3704	23.9649	23.4821	23.1896	23.4021	23.6416	24.584	24.0899	23.4735	23.8635	24.7878	23.3332	24.5536	NaN	23.3778	24.194				10	10	10	17.2	17.2	17.2	88.892	0	69.953	664500000	131
22.2673	24.185	22.2359	22.9608	23.1709	23.4104	23.8893	22.8264	23.0988	22.1016	22.9149	22.8853	22.8731	23.4721	22.1857	25.1241	25.9864	23.4841	22.3209	23.6843	23.5104	22.5733	22.3422	22.7036	23.1927	23.1574	23.6279	22.833	22.808	22.2719	22.581	22.2588	23.0174	22.7293	23.3729	22.8529				11	11	10	12.9	12.9	12.2	119.75	0	192.04	531060000	107
NaN	NaN	21.8141	20.9303	NaN	20.8005	NaN	NaN	20.8777	20.7941	21.0443	21.5317	20.816	21.0556	21.151	20.7877	21.3005	NaN	NaN	21.4674	21.3617	NaN	NaN	20.9646	NaN	NaN	21.7905	20.848	20.683	21.8311	NaN	21.0555	21.4151	20.9668	19.8174	NaN				4	3	3	4.3	3.6	3.6	133.63	0	5.4175	62573000	17
NaN	NaN	NaN	NaN	NaN	NaN	NaN	NaN	NaN	NaN	NaN	NaN	NaN	NaN	NaN	24.0177	NaN	NaN	NaN	NaN	NaN	NaN	NaN	NaN	23.3598	NaN	NaN	NaN	NaN	NaN	NaN	NaN	NaN	NaN	NaN	25.5349				2	2	2	9.4	9.4	9.4	57.011	0	9.1873	52396000	2
NaN	NaN	NaN	NaN	NaN	NaN	NaN	NaN	22.5996	NaN	22.0964	23.0527	25.2488	NaN	NaN	NaN	NaN	NaN	NaN	NaN	21.0176	NaN	NaN	NaN	NaN	NaN	21.0864	NaN	NaN	NaN	NaN	21.0338	21.9818	NaN	NaN	25.0413				4	4	4	14.3	14.3	14.3	52.843	0	6.3099	95254000	13
22.0956	NaN	NaN	NaN	NaN	22.293	21.8564	23.0521	22.0877	21.9238	21.7883	21.8091	21.595	NaN	21.6108	NaN	NaN	21.2811	21.6515	22.0597	NaN	NaN	22.3057	22.3703	NaN	NaN	21.8224	21.9051	23.3746	21.6195	21.1908	21.1937	21.3963	21.5953	NaN	21.6176				3	3	3	12.3	12.3	12.3	46.446	0	35.946	103290000	24
26.9612	22.5956	25.3867	25.8279	25.6917	26.5545	27.5471	25.7176	25.3996	25.0257	26.0534	25.7294	25.2979	26.2489	25.3059	26.1603	24.3401	26.4152	25.4401	25.7582	25.1991	25.6366	24.9651	25.3034	24.8293	24.0169	24.967	25.3038	25.7208	25.2185	25.669	24.8562	25.1836	25.9329	25.4222	24.9141				6	6	6	35.8	35.8	35.8	27.873	0	44.7	2086600000	71
NaN	NaN	22.1142	NaN	NaN	21.733	22.3393	22.3689	NaN	NaN	21.9157	21.6314	21.5115	NaN	NaN	NaN	NaN	NaN	NaN	NaN	NaN	NaN	NaN	NaN	NaN	NaN	22.3617	NaN	NaN	NaN	NaN	20.5284	NaN	NaN	NaN	NaN				3	2	2	9.3	6.8	6.8	80.419	0	86.312	46630000	14
NaN	NaN	NaN	NaN	NaN	NaN	NaN	NaN	NaN	NaN	NaN	NaN	NaN	NaN	NaN	20.8477	NaN	NaN	NaN	20.7742	NaN	NaN	NaN	NaN	NaN	NaN	20.1292	NaN	NaN	NaN	NaN	NaN	NaN	NaN	NaN	NaN				4	4	4	3.3	3.3	3.3	194.81	0.0021332	2.7531	21561000	5
NaN	NaN	21.5337	NaN	NaN	NaN	NaN	NaN	NaN	NaN	NaN	NaN	NaN	NaN	21.4542	NaN	NaN	NaN	21.5549	20.5048	NaN	NaN	NaN	NaN	20.3061	21.6026	NaN	NaN	NaN	NaN	NaN	NaN	NaN	NaN	NaN	NaN				3	3	3	5.6	5.6	5.6	100.34	0.0021277	2.7213	11056000	7
23.3401	23.4013	22.1467	22.6223	23.0965	20.9728	22.8247	22.584	22.0021	23.6159	22.6223	23.7019	22.9385	21.2446	22.5058	22.5609	22.9827	23.3581	22.6249	22.6956	22.9943	23.0517	23.0789	NaN	23.338	22.3984	22.5409	23.0241	22.7849	21.3906	NaN	23.0342	22.4573	23.2449	22.7605	21.8471				9	9	9	24	24	24	62.442	0	77.955	299760000	76
NaN	23.661	23.5585	23.036	23.6302	NaN	24.0372	NaN	22.7413	NaN	23.6798	23.8053	23.5893	NaN	23.9779	22.9883	22.7579	NaN	22.7177	24.4984	23.3605	NaN	NaN	23.013	23.3592	23.995	23.5436	NaN	23.4539	23.5807	23.5942	22.7233	23.2222	23.8253	NaN	NaN				2	2	2	8.1	8.1	8.1	51.417	0	245.72	334340000	30
23.0101	23.3558	23.639	22.9283	NaN	22.7371	NaN	NaN	22.1718	22.9164	23.2977	NaN	23.4524	23.0169	23.3094	NaN	22.0829	NaN	23.9999	23.0481	23.7462	24.0941	22.8782	23.2312	22.8799	23.2366	22.9441	22.9557	22.2667	22.9057	23.2362	22.9852	NaN	23.7119	23.2112	23.6466				3	3	3	13	13	13	43.064	0	323.31	278290000	38
NaN	NaN	NaN	NaN	NaN	NaN	21.3489	NaN	NaN	NaN	NaN	20.339	NaN	NaN	NaN	19.7523	NaN	NaN	NaN	NaN	NaN	NaN	NaN	NaN	NaN	NaN	NaN	NaN	NaN	NaN	NaN	NaN	NaN	NaN	NaN	NaN				2	2	2	13.7	13.7	13.7	32.559	0	18.946	8143800	7
26.0677	26.3187	26.2216	25.8609	26.3241	26.1118	25.8123	25.9832	26.1256	25.8805	25.6084	25.8146	25.9658	25.788	25.7602	26.1465	25.7431	26.4799	26.1368	25.7524	25.7416	26.4481	26.1028	26.2096	26.0436	26.6934	25.3064	26.1317	26.3918	25.3223	25.1615	26.0493	25.3498	26.0983	25.434	26.8156				11	11	11	31.7	31.7	31.7	58.022	0	323.31	2925800000	333
22.1017	NaN	NaN	NaN	NaN	NaN	NaN	NaN	NaN	22.3329	NaN	NaN	23.3367	NaN	NaN	NaN	NaN	NaN	NaN	NaN	NaN	NaN	NaN	22.6279	NaN	NaN	NaN	NaN	NaN	NaN	NaN	NaN	NaN	NaN	NaN	NaN				5	2	2	9.3	4.1	4.1	94.511	0.0016999	2.9931	31802000	5
22.5167	23.4565	24.22	23.0845	23.8938	23.1868	22.8631	22.9755	22.9997	23.6145	22.9243	23.4636	23.3693	22.0108	23.6922	23.0094	23.7009	NaN	23.1117	23.6558	23.4863	23.6632	22.9523	23.6339	23.8031	24.5403	22.9406	23.8166	23.2755	23.4517	22.8728	23.7282	23.0553	23.6458	23.3793	NaN				7	6	6	25.4	23.9	23.9	59.689	0	89.802	425110000	66
26.5623	27.7108	26.2716	25.0767	26.6655	25.6428	24.9885	26.3546	25.9356	26.2102	26.4696	25.8058	25.9402	24.7198	25.2052	26.9859	27.5765	26.1127	26.0255	25.7749	26.4649	26.4376	26.0281	26.8564	27.1395	27.1025	24.4744	26.4196	26.711	23.7125	24.5301	25.9474	25.045	25.944	27.0823	26.9914				4	4	4	71.9	71.9	71.9	10.403	0	323.31	4933100000	349
25.0309	24.9083	24.9222	24.8062	24.5655	25.785	25.2982	25.3724	24.2393	25.5368	25.1769	25.6851	25.5493	25.4487	26.0351	24.444	25.1194	25.1508	25.0959	25.6382	25.4929	25.4683	25.1487	24.0607	25.0987	24.8928	26.5275	25.2028	24.8153	25.4024	25.7959	25.0651	25.8982	25.611	25.7423	24.7835				23	18	18	38.7	31.3	31.3	105.36	0	163.77	1749300000	197
21.1089	22.05	23.6051	22.5871	23.6383	NaN	NaN	23.2159	NaN	22.6217	22.7798	22.9	23.4367	22.0379	25.4636	NaN	NaN	23.4024	NaN	24.3617	NaN	22.2783	22.7223	22.4209	22.6954	23.0101	22.6293	21.8564	23.1222	23.0862	22.9115	22.1702	22.1959	22.6114	22.2543	NaN				12	12	12	20.6	20.6	20.6	106.6	0	69.991	272700000	60
22.4068	22.649	22.9128	23.4903	23.7892	NaN	23.3354	22.5098	22.8792	23.3196	23.4686	23.1489	23.1484	24.5825	22.712	22.0054	NaN	23.4306	22.9681	22.6893	23.4646	22.859	23.3084	23.0089	22.4002	22.3631	23.5093	23.1262	22.5575	22.78	22.8416	22.9223	23.9842	23.1337	22.8852	22.7535				3	3	3	8.7	8.7	8.7	54.933	0	162.24	342540000	72
19.4742	20.9666	21.5294	20.8284	NaN	NaN	21.4103	21.1244	20.7401	21.177	21.6006	21.5062	NaN	NaN	21.1514	NaN	NaN	NaN	NaN	20.7396	21.4827	21.6511	NaN	NaN	NaN	NaN	21.3473	21.8545	20.9744	21.2939	21.596	20.801	21.0005	21.3974	NaN	NaN				2	2	2	5.7	5.7	5.7	17.4	0.0047054	2.2822	62195000	19
NaN	22.6723	21.7986	23.5907	22.5228	23.5333	22.2266	NaN	NaN	NaN	22.2239	NaN	NaN	24.8843	24.0759	22.5692	22.6463	24.3945	NaN	NaN	21.8939	NaN	NaN	NaN	23.2381	22.4936	NaN	21.9942	NaN	21.9046	21.6775	NaN	NaN	NaN	NaN	NaN				3	3	3	11.8	11.8	11.8	47.173	0	8.3488	209580000	22
21.6878	NaN	25.2197	22.6782	22.5546	24.3178	24.6629	24.1768	21.7521	24.192	24.2552	24.5206	24.7677	24.4253	25.5438	23.5098	23.817	NaN	NaN	25.253	23.9187	23.3556	22.055	22.7464	22.8751	22.2013	25.8996	24.5853	22.0624	25.4517	25.0632	NaN	23.962	23.6278	23.0335	22.234				8	8	8	20.7	20.7	20.7	66.294	0	77.35	754080000	119
24.7196	24.9893	24.1768	24.503	24.4927	24.481	25.0679	25.3542	24.6266	25.2623	25.2356	25.2723	24.7388	24.5008	25.0812	25.0385	23.9119	25.6784	23.9015	25.1915	24.6495	25.6625	25.3547	24.8719	25.0935	26.2626	24.8667	25.071	25.5699	24.8123	25.1228	25.5541	23.4377	25.2179	24.5547	25.3959				7	7	7	17.9	17.9	17.9	70.678	0	22.853	1335400000	98
22.9959	23.2186	22.3487	21.0479	22.1726	22.3425	NaN	NaN	21.75	21.2176	22.3605	22.0588	22.3681	NaN	NaN	NaN	23.289	22.4642	22.8674	21.8217	NaN	NaN	NaN	22.9566	23.4085	22.8586	NaN	23.1806	22.9136	21.097	NaN	NaN	NaN	22.7343	NaN	21.1169				2	2	2	22.1	22.1	22.1	24.118	0	54.95	150460000	27
23.0732	23.6511	24.2079	23.5398	23.4521	23.0161	23.3164	23.729	22.87	23.9211	21.5388	23.8646	23.3543	NaN	23.715	NaN	21.9142	23.2078	24.3461	23.7997	23.6779	23.6678	23.9587	23.8187	24.1131	23.348	23.469	24.2468	23.161	23.609	23.8337	24.3114	23.1057	23.6547	NaN	NaN				5	5	5	32.8	32.8	32.8	33.392	0	123.84	456140000	85
26.6277	27.6663	25.7341	26.6917	26.9043	26.3656	26.5182	25.4367	27.1674	25.9652	25.4871	26.3202	26.2148	27.4519	26.4814	26.5657	27.0098	27.5298	26.9644	25.3459	26.8232	26.4571	26.6192	26.5731	26.4224	26.8805	25.5647	26.7032	26.6761	26.143	26.1927	26.5041	26.5048	26.3445	25.727	25.8518				8	8	8	50.9	50.9	50.9	29.644	0	323.31	4418200000	175
NaN	NaN	21.3957	22.7208	NaN	22.2857	22.6064	22.8228	23.2497	NaN	NaN	22.9119	NaN	NaN	21.8861	NaN	NaN	NaN	NaN	21.5245	NaN	21.9812	21.7365	NaN	22.3588	21.9869	NaN	22.7845	22.9035	20.9481	22.3013	NaN	21.5991	NaN	22.9799	22.2307				3	3	3	22.1	22.1	22.1	19.206	0	8.8678	107560000	46
24.2826	NaN	NaN	NaN	24.2958	22.8172	NaN	23.9012	23.0022	24.2166	23.7344	24.0233	23.3969	23.7895	24.5515	NaN	22.6572	22.445	23.7102	23.42	24.1099	NaN	NaN	24.3983	23.7543	23.9886	23.7613	24.358	23.8269	23.7201	23.3537	24.4205	23.5091	24.889	NaN	22.5883				2	2	2	14.4	14.4	14.4	23.568	0	135.57	439520000	34
NaN	NaN	NaN	NaN	NaN	NaN	NaN	NaN	NaN	NaN	NaN	22.1189	NaN	NaN	NaN	NaN	NaN	NaN	NaN	NaN	NaN	NaN	NaN	NaN	NaN	NaN	NaN	NaN	NaN	NaN	NaN	NaN	24.2282	NaN	NaN	NaN				3	3	3	13.1	13.1	13.1	49.405	0.00025608	3.7635	42242000	3
24.4142	NaN	24.7047	24.6996	NaN	23.874	NaN	24.3381	24.1473	23.8776	NaN	23.3336	NaN	24.0138	23.1659	23.1481	NaN	25.0162	24.7351	23.5919	NaN	NaN	23.9595	NaN	24.4901	24.8244	23.0838	23.8396	24.7284	NaN	22.6828	24.4333	NaN	23.9671	23.8969	25.3078				2	2	2	14	14	14	19.471	0	155.47	535380000	32
22.0447	NaN	22.7251	22.6817	22.5016	NaN	NaN	NaN	20.8736	NaN	NaN	22.2467	NaN	NaN	NaN	NaN	NaN	NaN	22.903	21.4456	NaN	22.1832	21.856	NaN	21.8356	21.8221	NaN	NaN	NaN	NaN	NaN	22.3256	NaN	21.987	NaN	21.2478				3	3	3	25.8	25.8	25.8	26.251	0.0005048	3.5265	66785000	12
22.9642	22.4679	24.1739	23.7545	23.0483	23.0899	23.1574	23.1423	22.6341	22.8163	22.5583	22.6807	NaN	NaN	22.8533	22.1178	22.4597	22.9437	23.0832	22.1675	23.2684	22.4987	22.4276	23.0111	20.9596	21.4021	NaN	23.2188	22.1744	23.1806	23.2604	22.4805	23.0293	22.5529	22.5518	20.8433				3	3	3	17.3	17.3	17.3	20.143	0	7.6299	275940000	39
NaN	NaN	NaN	NaN	NaN	NaN	NaN	NaN	NaN	NaN	NaN	NaN	NaN	NaN	NaN	NaN	NaN	NaN	NaN	20.9524	NaN	NaN	NaN	NaN	NaN	NaN	21.5121	NaN	NaN	NaN	NaN	NaN	21.1627	NaN	NaN	NaN				3	3	3	13.6	13.6	13.6	65.596	0.00027248	4.9276	13791000	4
NaN	NaN	21.2028	NaN	21.9308	NaN	NaN	NaN	NaN	21.5037	NaN	21.5341	21.9159	NaN	NaN	NaN	NaN	NaN	NaN	NaN	21.956	21.2457	NaN	NaN	NaN	NaN	NaN	NaN	NaN	NaN	NaN	NaN	NaN	NaN	NaN	NaN				3	3	3	16.6	16.6	16.6	37.893	0.00098135	3.1605	27775000	7
NaN	NaN	NaN	NaN	NaN	NaN	NaN	NaN	NaN	NaN	NaN	NaN	NaN	NaN	NaN	NaN	NaN	NaN	NaN	NaN	NaN	NaN	NaN	NaN	NaN	NaN	NaN	NaN	NaN	NaN	NaN	NaN	NaN	21.0362	NaN	NaN				2	2	2	7.8	7.8	7.8	26.724	0.0038893	2.4722	1691300	2
26.0108	25.1431	23.8467	25.6838	25.6636	24.9162	24.6723	24.8807	24.7941	25.7618	25.361	25.6078	25.0434	25.1412	25.2523	24.6128	23.9672	25.2134	25.5159	25.2388	25.0926	25.6072	25.4298	25.9436	26.1276	25.8611	25.1247	25.7711	26.1172	25.4445	25.0029	25.9945	25.2689	25.7109	24.6319	25.2932				8	8	8	29.1	29.1	29.1	47.46	0	323.31	1685000000	122
23.5412	22.2493	22.0219	23.021	22.0031	NaN	22.82	NaN	NaN	NaN	NaN	NaN	NaN	NaN	NaN	21.2747	NaN	22.2829	23.6428	NaN	NaN	21.5352	NaN	NaN	19.7965	NaN	NaN	22.1646	22.5262	NaN	NaN	NaN	22.443	23.4266	NaN	22.1621				2	2	2	44.3	44.3	44.3	9.7552	0.00050201	3.4412	91572000	12
NaN	NaN	21.6558	NaN	NaN	NaN	21.0577	NaN	NaN	19.2581	20.4272	NaN	NaN	18.7173	21.9322	20.8084	NaN	NaN	NaN	22.0156	NaN	NaN	NaN	NaN	NaN	NaN	21.9853	21.6757	NaN	21.834	21.7281	20.4538	NaN	20.396	NaN	NaN				2	2	2	5.5	5.5	5.5	42.717	0.0043103	2.4003	47556000	20
25.9479	NaN	24.3838	NaN	24.2959	26.1364	NaN	NaN	NaN	23.7343	24.7535	24.8996	23.8542	NaN	23.872	NaN	NaN	26.1865	25.2846	NaN	NaN	NaN	NaN	22.9084	NaN	NaN	NaN	NaN	23.1574	23.7067	NaN	24.6775	NaN	NaN	NaN	NaN				2	2	2	23.5	23.5	23.5	11.268	0.0034634	2.5302	542160000	11
21.3382	23.2888	NaN	22.0126	21.2618	24.4589	23.7655	21.3951	22.6183	21.53	23.0092	23.2427	21.4575	23.8381	27.6337	22.906	24.1563	NaN	22.9638	22.8797	NaN	24.3431	21.2361	22.2364	23.9189	23.6394	NaN	23.5581	22.005	NaN	22.4298	23.3106	22.7641	23.168	22.3138	21.7677				8	8	6	27.2	27.2	21.3	39.854	0	71.963	526830000	65
29.9933	29.0154	29.601	29.2617	28.8814	29.5135	29.2936	29.7765	29.3571	29.8352	29.1981	29.913	29.3887	29.32	29.6208	29.272	29.2351	29.2202	29.2353	29.4529	28.7252	29.4301	29.9073	29.3085	29.0422	29.0062	29.9321	29.2837	29.4281	29.1154	29.5656	29.4766	29.3062	29.8622	29.8221	30.1622				16	16	16	54.8	54.8	54.8	36.688	0	323.31	31214000000	672
26.4138	23.9625	24.0439	23.8505	23.6128	26.292	23.1686	28.7428	23.3576	23.3469	23.583	24.6307	24.4721	24.8604	25.7343	24.6318	24.8479	26.3919	24.4392	26.9035	24.5239	22.8536	24.6697	25.0406	25.6354	25.6029	22.441	25.9065	27.0169	22.2473	22.9827	24.3975	24.0316	21.5359	23.5708	21.4099				16	16	16	52.5	52.5	52.5	54.861	0	323.31	1788200000	144
26.6979	26.6274	27.4792	27.2442	26.335	27.3554	27.5627	27.5904	26.7965	27.1638	27.1371	27.0433	27.7589	27.5447	27.8761	26.9906	26.5645	27.2478	26.4059	27.6966	26.7549	27.1215	26.6034	27.1288	26.398	25.8661	27.2104	27.7852	26.3917	27.719	27.8338	27.0494	26.9439	26.8359	27.6834	25.5261				18	18	18	47.1	47.1	47.1	61.397	0	194.92	6449500000	348
25.508	25.1172	26.9662	26.1203	25.7415	26.2935	26.3969	26.6978	26.1481	26.4597	26.4103	25.8531	26.3406	26.7256	26.4748	25.9365	26.1496	26.0572	26.1863	26.0904	26.66	25.5533	25.9823	25.5891	25.4283	25.3993	27.1629	26.3176	26.0905	26.1848	26.7384	25.8753	26.9268	25.4598	26.0474	25.6037				10	10	10	66.5	66.5	66.5	31.628	0	199.12	3475300000	232
26.4538	26.0168	26.7385	25.858	26.6129	25.7282	25.7337	26.1649	26.0729	26.4708	25.921	26.6158	26.5395	24.9416	26.7304	26.1322	25.3952	25.7912	26.1825	26.2544	26.004	26.7576	26.4611	26.2633	26.5483	27.0632	25.8141	26.3412	26.6583	26.4727	26.6228	26.7221	25.9026	26.6557	26.0174	26.1664				8	8	8	35.5	35.5	35.5	51.7	0	317.49	3486000000	248
27.2904	26.3698	27.9201	27.099	27.2357	27.6399	27.4815	27.1419	26.5527	26.7209	26.5989	27.2018	26.5693	26.5043	26.9572	27.2975	26.1149	27.5807	27.5221	27.3448	27.2375	27.2165	27.1315	27.8291	26.3861	26.8992	26.4341	27.1871	26.9189	26.9488	26.6518	26.5201	26.5843	26.4033	27.415	26.5588				4	4	4	24.7	24.7	24.7	25.565	0	183.24	6759000000	281
28.375	26.9882	25.7964	27.3188	27.5598	26.415	26.5187	27.6812	26.4071	26.9229	26.5142	27.0435	26.4238	26.2458	26.7933	28.4508	26.8825	27.4392	27.5639	25.7598	26.5418	27.6116	27.9448	27.3649	27.6232	27.9879	25.9017	27.105	27.8626	26.0974	26.2813	27.4227	26.1267	27.4665	25.278	26.5225				5	5	5	60.4	60.4	60.4	15.936	0	323.31	6643000000	202
26.8112	26.0118	26.6031	27.0035	26.2002	26.8029	27.2747	26.7958	29.2484	27.2838	28.6756	27.5161	28.2691	28.1157	27.511	28.8555	28.2525	25.8278	24.6623	26.4802	27.534	25.5446	26.5956	25.3447	26.4776	23.8052	29.7051	26.7517	26.2672	27.332	28.6019	25.0026	28.881	26.4875	29.3645	27.4927				19	19	17	28.7	28.7	26.8	122.2	0	323.31	10638000000	473
27.3571	26.9122	26.4356	27.7698	26.737	27.6392	30.1473	21.6903	30.005	27.6825	29.165	27.8165	27.4946	30.7786	26.6306	29.0852	28.6883	26.1705	25.5137	25.7269	28.5673	26.9869	NaN	24.804	26.8235	22.2555	28.7118	26.7831	24.3019	27.8934	27.4155	22.8534	28.1282	27.3151	29.9289	27.9898				25	25	25	51.8	51.8	51.8	83.266	0	323.31	15145000000	611
28.0966	27.8003	28.2497	27.9435	28.6495	28.0525	28.0213	27.9869	28.3628	28.0948	28.1435	27.872	28.3995	27.804	28.0823	28.126	27.6508	27.7173	28.4309	27.5009	28.0578	28.4211	28.1189	28.3993	28.3002	28.4854	27.3792	28.3937	28.2711	27.3111	27.6132	28.2795	27.734	27.7371	28.6185	29.035				19	19	19	75.4	75.4	75.4	32.118	0	323.31	13745000000	679
28.4327	27.1881	26.4713	26.6404	27.0261	26.8474	26.8119	27.3933	27.1202	27.3838	26.934	26.919	26.9291	27.007	25.208	26.6725	26.1715	27.2199	26.8734	26.3149	26.2137	27.1397	27.8085	26.8309	26.5538	27.1529	26.3061	27.0877	27.9955	25.517	26.7313	27.3006	26.1763	27.0177	27.7465	28.0507				8	8	8	53.7	53.7	53.7	24.579	0	172.69	6079200000	296
25.5499	24.9711	27.382	25.2975	25.7852	26.3528	26.4933	26.1778	25.5915	26.2989	26.362	26.4132	26.3168	26.5352	26.8185	NaN	25.6923	26.0195	25.3389	26.8856	25.9591	26.6714	25.9204	25.5954	25.1512	25.4824	26.6176	26.8736	25.1808	26.9949	27.0978	25.5948	26.3272	26.2884	25.7448	25.8028				6	6	6	22.1	22.1	22.1	47.517	0	231.64	2985900000	102
31.0721	29.9101	30.6277	30.6387	30.8046	30.3975	30.5296	31.0396	30.6825	30.9143	30.5472	31.0885	30.8941	30.5338	30.7613	29.9271	29.4896	30.8827	30.9279	30.6532	30.0576	30.7044	30.8547	30.4669	30.4438	30.8907	30.5261	30.6675	31.0184	30.4549	30.5925	31.1263	30.304	30.7808	30.8891	31.1097				20	20	17	61.4	61.4	55.9	44.614	0	323.31	71269000000	1143
NaN	NaN	24.2838	NaN	NaN	NaN	NaN	NaN	24.0474	22.3158	23.6806	23.5098	23.9336	23.6745	23.2411	NaN	24.9972	NaN	NaN	21.6409	25.229	NaN	NaN	NaN	23.4124	NaN	24.0799	22.7721	NaN	23.7219	23.4509	NaN	23.2326	NaN	21.4636	NaN				4	4	3	28.4	28.4	23.7	21.635	0	69.199	343770000	33
23.3727	24.3813	22.8073	25.9747	24.7186	25.4762	NaN	22.5198	27.7114	25.0694	26.0623	24.4183	25.3655	26.7235	24.3581	25.8622	26.2401	23.2801	24.4998	24.2281	26.2299	24.5804	24.8905	NaN	25.084	23.703	26.5017	25.6214	23.4457	26.6176	26.3077	22.976	26.6238	25.6775	27.9578	25.6664				15	15	15	36.2	36.2	36.2	70.036	0	323.31	2018400000	179
NaN	NaN	NaN	23.6915	21.7053	23.492	23.0428	NaN	24.3444	23.7672	24.5878	24.1483	23.9527	24.5183	23.5168	NaN	24.1289	NaN	NaN	NaN	24.2121	NaN	22.8841	NaN	NaN	NaN	25.4954	21.6814	NaN	25.0957	24.7383	NaN	26.0199	23.8852	24.3405	NaN				4	4	4	9.5	9.5	9.5	80.118	0	16.703	509160000	39
28.8314	26.4157	26.6274	30.6228	28.5558	28.1774	29.262	NaN	30.8209	29.039	30.717	29.7108	28.7655	30.4309	28.8959	28.2787	29.0885	26.6786	26.0683	27.642	29.6492	27.5332	28.8943	26.2214	28.2084	26.9799	29.6732	27.9813	27.3262	28.8463	28.3417	26.6726	30.487	28.4093	30.7417	30.2415				10	10	8	44.4	44.4	37.5	38.451	0	323.31	26161000000	346
NaN	NaN	NaN	NaN	20.554	NaN	NaN	NaN	20.1145	18.8629	NaN	21.7759	NaN	NaN	NaN	NaN	NaN	NaN	NaN	NaN	23.3358	NaN	NaN	NaN	NaN	NaN	18.4452	NaN	NaN	NaN	NaN	NaN	20.2226	18.5574	NaN	NaN				5	3	3	20.1	13.2	13.2	39.029	0.00026028	4.0445	23794000	13
21.4253	NaN	21.2963	22.5275	22.9483	21.969	NaN	21.0205	23.6745	22.8952	22.8824	22.246	22.6444	22.8429	NaN	24.619	24.9272	19.8169	21.0263	19.4531	24.5513	22.3193	21.5381	NaN	22.9441	21.4178	21.8938	21.9465	21.9006	23.2214	NaN	NaN	23.1922	NaN	22.6039	21.784				5	5	5	38.7	38.7	38.7	27.033	0	154.88	334820000	41
NaN	21.6199	NaN	24.0057	23.6676	21.5518	NaN	NaN	24.5598	23.779	23.4711	24.5365	24.0683	24.9703	24.7353	23.6665	24.7826	NaN	22.6425	23.723	25.0776	22.7338	21.7697	NaN	23.5322	NaN	26.3277	24.4806	23.7098	25.1406	26.3749	22.1631	26.5298	23.6296	27.144	24.7592				9	9	9	18.5	18.5	18.5	90.568	0	282.19	946050000	111
NaN	NaN	NaN	NaN	NaN	22.5426	NaN	NaN	22.6148	22.1885	NaN	22.9186	21.8747	23.405	NaN	23.532	23.3697	NaN	NaN	NaN	NaN	NaN	NaN	NaN	22.3431	NaN	NaN	20.2265	NaN	22.9506	23.5014	NaN	25.2713	NaN	NaN	NaN				3	3	3	7.3	7.3	7.3	67.791	0	9.0551	165280000	17
22.5574	23.3237	25.1676	26.1101	24.1867	24.8333	24.7018	24.1108	27.226	26.4678	27.355	25.9943	26.6098	26.8215	26.1703	27.1165	26.7478	24.1384	22.6889	24.5883	26.3637	23.5892	24.9254	23.0735	25.7722	23.5905	28.039	25.1867	24.3139	26.9166	26.8603	21.8458	28.8286	25.4878	27.3661	24.9199				14	14	14	27.2	27.2	27.2	85.532	0	139.62	3126700000	149
26.6122	23.3961	NaN	25.0328	22.6031	25.3564	25.1645	27.4626	24.3451	25.0298	25.7757	24.9634	28.5496	23.9045	25.0509	25.2438	25.2207	26.4818	24.9546	24.7242	25.3322	24.4848	26.0749	NaN	24.9863	24.2161	24.22	25.4376	25.7946	24.899	24.9755	25.4144	23.8955	24.0788	24.246	24.9324				9	9	9	43.5	43.5	43.5	40.764	0	157.26	2174000000	97
22.6533	NaN	22.6223	23.4129	NaN	24.887	22.677	22.8484	24.6842	22.981	25.0239	22.0865	23.0419	25.2109	25.6801	23.0047	25.9126	NaN	20.6731	22.8609	22.9198	24.1882	23.8703	22.8771	23.4918	22.1232	23.0598	26.2015	NaN	25.0874	23.9603	22.0259	25.1055	23.8434	23.0158	22.4115				4	4	4	20.7	20.7	20.7	28.87	0	81.309	753810000	68
23.8243	23.587	24.2859	24.1855	NaN	24.2343	NaN	23.42	23.1561	22.9316	23.7317	NaN	24.0031	25.1637	24.6698	21.4811	25.1999	NaN	NaN	23.0869	NaN	22.2808	24.4929	23.7729	22.9008	22.7777	21.8328	26.0651	23.7395	24.0194	23.598	22.704	23.3936	23.1237	24.0322	NaN				5	5	5	32.7	32.7	32.7	29.246	0	12.194	547760000	54
NaN	NaN	21.9839	NaN	NaN	23.3598	24.1092	23.3444	23.0415	NaN	23.0892	22.6293	21.9532	23.6222	22.869	23.6497	24.1402	NaN	NaN	21.9552	NaN	NaN	NaN	NaN	NaN	NaN	23.2654	21.5245	NaN	22.537	22.7059	22.0715	23.4774	21.0878	22.208	NaN				3	3	3	10	10	10	46.53	0.00026667	4.4792	218140000	23
23.3458	24.0636	24.1272	24.865	25.1294	24.9895	NaN	23.1505	25.0882	23.8721	25.1133	24.4651	24.7834	24.8483	25.5241	25.158	25.892	23.813	23.3764	23.6535	25.3204	24.5118	23.3336	23.1302	24.2854	22.0256	24.9152	23.8833	22.5917	25.6508	24.3247	23.47	26.7818	25.0098	24.7208	22.6159				12	12	12	40.9	40.9	40.9	52.602	0	179.03	1149700000	110
28.4667	27.0076	26.9113	29.5961	28.2379	28.7093	29.0732	27.6132	30.5547	28.9694	31.2048	28.9573	29.6702	30.2145	28.309	29.8153	29.2943	27.1806	26.6169	26.6385	29.8269	27.6009	28.5018	25.1253	28.1125	26.5819	30.0868	27.353	28.3017	28.6749	29.2557	26.8927	29.4436	27.6546	30.7053	28.6845				15	15	15	51.2	51.2	51.2	46.736	0	323.31	23134000000	536
27.2198	26.3685	26.5193	29.5489	27.6243	28.2617	30.1581	25.4425	30.5912	27.9728	30.167	28.0163	28.6367	30.3366	26.9995	28.6332	28.4091	27.178	26.5284	26.0756	28.3988	26.7558	28.0886	25.9853	27.4259	24.8328	28.946	26.9882	26.8642	27.6381	27.9999	25.6265	28.5537	26.8817	29.8616	29.4698				13	13	13	43	43	43	47.65	0	323.31	14962000000	398
24.1807	24.0819	23.7561	25.5632	22.1933	25.0279	24.9817	24.146	27.0842	24.8824	26.4484	25.3704	27.6469	24.8203	24.2496	28.1438	26.1236	23.6316	21.9894	23.9872	26.2187	24.881	24.445	23.4756	24.4241	21.4044	27.0858	24.989	26.3449	25.7868	27.2209	23.7545	26.7163	25.1096	28.35	25.0324				10	10	10	34.2	34.2	34.2	53.154	0	323.31	2961700000	245
25.908	25.2075	26.9256	27.3193	25.4721	27.7713	25.4318	24.5575	28.7522	26.919	28.5375	27.1803	27.818	28.5356	28.6893	28.4062	28.4509	26.2597	24.3913	27.7452	28.2507	25.9001	26.7123	24.2522	27.2249	26.2026	29.5885	27.7162	24.2316	28.3815	28.6997	24.7163	29.9074	25.7887	29.4963	27.7865				36	36	31	40.5	40.5	35.8	163.29	0	323.31	10029000000	640
26.8913	27.1136	28.7911	28.8208	27.4571	29.1314	28.444	27.8521	30.3972	29.4187	30.1382	29.3465	29.6597	30.69	29.5422	29.7617	29.8273	26.9552	26.4028	28.9979	29.5821	27.5019	27.014	26.0431	28.5291	27.3672	31.1438	28.8434	26.8547	30.4069	30.3568	26.6525	31.5494	28.7346	30.3522	28.7253				58	58	55	52.7	52.7	50.8	187.15	0	323.31	34944000000	1340
NaN	24.9002	25.3265	24.796	NaN	23.6786	NaN	NaN	25.0778	24.4642	23.9532	23.8642	24.5308	23.1695	23.863	26.001	25.3133	NaN	NaN	NaN	NaN	NaN	25.5692	NaN	NaN	25.4951	26.2846	23.3673	NaN	24.8129	25.513	NaN	26.5509	NaN	25.9907	NaN				13	13	13	15.2	15.2	15.2	188.3	0	60.785	894110000	40
NaN	22.1247	22.6489	25.0189	24.0971	NaN	NaN	NaN	27.5707	24.515	23.7375	24.2875	NaN	26.0422	22.2162	24.8042	23.8425	NaN	25.2954	NaN	25.1734	NaN	25.1459	NaN	22.3725	NaN	24.9037	22.0868	NaN	24.5695	25.1607	NaN	24.6268	21.9803	25.8522	24.6754				6	6	6	44.9	44.9	44.9	23.171	0	122.2	752400000	48
23.5315	23.7716	NaN	24.1041	20.6697	NaN	NaN	24.3017	23.566	23.6177	23.8924	23.0254	23.8247	24.4746	23.2029	22.4004	22.3941	24.6446	23.076	21.8187	24.2838	21.9302	22.9741	23.314	22.6899	22.2325	22.8294	NaN	23.2809	23.6797	23.2122	23.4439	23.5923	23.4638	NaN	NaN				2	2	2	18.5	18.5	18.5	15.799	0	8.2669	411810000	28
24.858	25.0546	25.5568	25.8187	24.883	24.5788	24.5987	26.3065	25.9475	25.9492	25.0548	26.6061	24.3727	24.684	24.7	24.0933	25.2604	25.3611	25.8218	24.2149	25.2074	25.2263	25.0635	25.3976	25.218	23.6968	NaN	24.4634	24.6094	24.1883	24.1234	25.5709	24.6362	25.4164	26.1321	25.0966				3	3	3	40.8	40.8	40.8	11.006	0	33.62	1584300000	65
NaN	26.2133	NaN	24.8676	NaN	24.2935	NaN	NaN	25.757	23.987	25.2982	24.5532	25.2443	26.3362	NaN	26.6628	24.9422	NaN	NaN	22.929	24.389	NaN	24.4404	NaN	24.1362	22.3331	25.8313	25.2496	24.841	25.1316	25.6127	NaN	25.7676	NaN	26.0547	24.7323				7	7	7	14	14	14	71.957	0	25.611	1196200000	55
26.8727	24.1116	NaN	27.5113	NaN	24.5702	25.5571	NaN	26.9188	24.3635	26.3684	25.5847	24.0965	25.2427	24.1021	26.2024	24.907	26.2254	25.1655	23.7484	25.95	23.4984	25.541	24.3466	25.8056	21.2034	24.4598	24.7089	24.2809	24.4669	25.0722	23.5692	26.481	24.6764	25.9736	25.1288				4	4	4	29.6	29.6	29.6	18.098	0	35.07	1669200000	75
NaN	NaN	NaN	26.5583	24.0988	NaN	NaN	NaN	26.6706	24.1999	28.0321	25.6106	25.8816	NaN	24.6069	26.9326	25.1544	24.5788	NaN	25.8532	24.7687	24.8014	26.8954	NaN	25.0602	NaN	25.1419	24.6445	NaN	24.7427	25.6836	NaN	25.1945	24.6651	NaN	25.9623				2	2	2	24.8	24.8	24.8	12.283	0	63.084	1607100000	20
21.9718	22.0007	22.2369	21.9764	22.1735	21.1495	21.2305	22.2047	NaN	22.7746	21.919	22.6561	20.8636	21.0168	22.6793	22.9137	22.0209	21.7192	21.768	22.2646	NaN	22.7302	22.317	21.4508	22.236	22.9176	22.1643	21.8545	21.7981	22.3116	22.0921	22.1899	22.0211	22.4035	21.1055	NaN				2	2	2	6.6	6.6	6.6	51.11	0	58.336	171490000	62
23.2401	21.8145	24.1365	22.755	24.0235	NaN	NaN	23.8763	NaN	22.4656	22.4463	22.2911	22.4358	NaN	21.9192	23.2623	22.6651	22.2347	22.3045	22.1843	21.4765	23.2351	23.4342	24.0946	NaN	24.3094	19.799	22.7079	24.1812	22.1817	21.5366	22.3019	NaN	22.3987	22.0303	22.0171				4	4	4	22.2	22.2	22.2	21.585	0	180.56	257120000	67
21.1809	NaN	NaN	NaN	NaN	NaN	NaN	NaN	NaN	NaN	NaN	NaN	NaN	NaN	NaN	NaN	NaN	NaN	NaN	NaN	NaN	NaN	NaN	NaN	NaN	NaN	NaN	NaN	NaN	NaN	NaN	NaN	NaN	NaN	NaN	NaN				2	2	2	5.1	5.1	5.1	83.283	0	34.062	1558300	2
29.6909	27.6279	27.6361	30.1547	28.4371	29.512	30.3359	28.0868	30.4999	29.2794	31.2125	29.638	30.38	29.8256	29.3605	31.0947	30.6998	28.1147	27.2843	27.9594	30.6987	28.3784	28.2809	28.1226	29.0537	26.4494	31.2288	28.9435	28.1132	30.339	30.0052	26.9859	31.3535	28.7419	30.1295	29.0817				7	7	3	80.4	80.4	32.7	11.765	0	323.31	45104000000	924
21.7591	NaN	NaN	NaN	NaN	NaN	NaN	21.3839	NaN	22.13	21.0382	20.6317	NaN	NaN	NaN	21.7634	NaN	NaN	NaN	21.0867	NaN	22.2264	21.8012	21.604	21.9874	22.7513	NaN	21.519	22.0739	NaN	NaN	20.865	NaN	21.4391	NaN	NaN				3	3	3	30	30	30	15.716	0	19.841	58842000	23
NaN	26.7278	NaN	NaN	NaN	NaN	NaN	NaN	NaN	NaN	NaN	NaN	NaN	NaN	NaN	NaN	NaN	NaN	NaN	20.8465	NaN	25.2232	NaN	NaN	NaN	NaN	NaN	21.7839	NaN	NaN	24.3721	NaN	NaN	NaN	NaN	NaN				5	5	5	15.2	15.2	15.2	60.322	0	15.085	288320000	13
NaN	NaN	NaN	NaN	NaN	NaN	NaN	23.5706	23.9035	22.886	24.2646	21.3914	NaN	23.8144	24.6798	25.3397	23.2132	NaN	NaN	20.8282	23.2229	NaN	NaN	NaN	NaN	NaN	25.6808	NaN	NaN	24.7571	NaN	NaN	25.9364	NaN	26.28	NaN				8	2	2	31	12.9	12.9	35.9	0	12.057	455730000	18
25.1482	NaN	25.7638	27.2042	27.1169	26.9525	24.3726	NaN	27.0974	27.1035	27.9489	25.9915	28.291	28.0623	27.6091	28.0599	28.313	25.2058	24.554	25.8492	27.7615	26.3762	25.1948	24.5095	27.0199	24.4208	28.4406	26.2031	25.2145	28.7634	28.1322	NaN	29.5633	26.2001	27.144	NaN				9	4	2	30.8	18.3	10.9	41.287	0	323.31	6928200000	86
26.2877	NaN	26.9391	28.1077	27.0598	27.312	28.2791	24.6684	27.5606	28.0964	29.3543	27.7189	29.5476	30.1664	28.7212	28.2524	29.0067	26.2026	25.3486	24.994	27.8941	27.5728	26.811	NaN	28.7923	24.7266	29.2236	27.1929	25.6594	29.7063	27.8641	24.443	27.9957	27.9542	24.729	27.5973				9	4	3	43.1	22.6	18.3	35.94	0	150.41	12330000000	98
26.4813	26.5595	26.7192	27.266	26.1533	27.4109	25.228	NaN	29.841	27.9664	29.7795	26.6505	27.801	29.2594	28.6632	28.1217	25.2705	NaN	25.0578	27.1845	28.2932	27.0962	26.1956	25.4272	27.2008	27.0704	29.4026	27.3593	24.9747	28.4704	27.9733	27.1933	28.9178	27.2276	28.7223	NaN				11	11	3	39.7	39.7	11.7	49.439	0	323.31	9496500000	200
28.87	25.7909	23.9814	30.2163	28.7504	28.9226	28.772	24.9953	29.9881	28.0994	31.0798	29.4797	29.0729	28.7303	28.5273	30.3415	30.5916	28.8222	24.7545	28.063	30.0285	27.9334	28.0832	27.8205	29.155	25.6436	29.9287	28.4373	25.7934	30.1435	29.8687	26.7852	31.2264	28.8113	29.3721	30.049				9	9	7	44.5	44.5	32.6	37.654	0	323.31	32703000000	489
NaN	24.7255	26.0386	NaN	25.7928	25.6158	NaN	NaN	24.9261	NaN	NaN	24.8096	25.3322	23.7584	25.8673	25.626	26.8987	NaN	22.2601	NaN	24.9322	26.2385	NaN	23.6313	24.7684	25.6623	23.7943	24.5735	NaN	25.3287	26.0469	25.3774	28.6489	25.5507	23.6311	26.7652				9	9	2	35.8	35.8	6.5	47.499	0	102.67	1856000000	71
29.0635	28.7959	29.6381	29.0398	29.8146	29.036	27.6673	28.8338	28.2988	29.0211	29.1744	28.2689	27.8894	28.6761	28.8661	29.0906	28.1503	28.6738	28.9639	28.8619	29.0769	29.3407	28.5072	29.1122	27.9747	28.8926	28.3133	29.1019	28.9553	28.7819	29.0038	28.5432	28.6896	28.6975	29.3195	30.1538				7	7	6	39	39	34.3	28.607	0	323.31	21726000000	575
25.4866	NaN	25.1397	24.6644	25.5864	24.1017	23.8914	23.9579	25.1677	26.2976	24.0905	NaN	22.9462	NaN	26.0957	NaN	25.3067	24.6349	24.1219	NaN	26.0601	25.5361	23.7672	24.1067	22.9273	23.3056	22.9995	24.4922	23.2909	NaN	NaN	NaN	NaN	23.9822	25.4379	24.2136				3	3	3	16.1	16.1	16.1	27.805	0	24.125	893040000	82
NaN	NaN	24.1743	25.4068	26.5825	23.7961	23.793	NaN	25.1728	27.3025	23.6703	NaN	22.0067	NaN	27.5327	NaN	24.5113	26.8417	22.7998	24.2664	26.5726	26.179	25.4113	NaN	25.7105	NaN	23.0221	24.4801	NaN	NaN	NaN	NaN	NaN	NaN	25.8839	25.7634				4	4	4	24.9	24.9	24.9	29.991	0	323.31	1371900000	54
26.5651	25.9034	26.4772	27.7	26.1926	29.1301	26.7131	26.6095	28.3205	26.6544	28.0425	25.7044	27.2266	28.9823	27.8431	26.2947	30.4646	26.2813	25.8511	28.2106	26.4781	27.4502	27.0798	27.1299	27.3303	27.3359	26.4454	29.9833	27.0488	28.8275	27.9555	26.0771	28.3428	27.7038	28.0043	NaN				7	4	4	54.4	36.1	36.1	16.055	0	323.31	12137000000	153
NaN	NaN	30.8818	NaN	NaN	19.335	NaN	NaN	NaN	NaN	22.4345	NaN	NaN	NaN	NaN	NaN	NaN	NaN	NaN	NaN	NaN	NaN	NaN	NaN	NaN	NaN	NaN	NaN	NaN	NaN	NaN	NaN	22.3494	NaN	NaN	NaN				4	4	4	39.6	39.6	39.6	17.184	0	30.495	1815300000	10
25.9306	25.5662	26.4272	29.6778	28.5978	28.6359	26.5123	26.8764	31.6764	30.5341	31.4608	28.1382	31.2069	31.5013	30.5019	27.644	31.534	28.2827	25.6831	25.4735	30.0647	29.1812	27.966	23.7616	30.4454	26.3876	31.5987	28.0233	27.7376	30.8429	29.6255	26.0878	33.2248	28.9061	28.307	25.7562				14	14	14	17.3	17.3	17.3	138.94	0	251.32	54734000000	227
NaN	NaN	NaN	NaN	NaN	23.7986	22.6635	22.0032	23.5317	23.1898	23.3363	22.1399	23.6215	24.3351	24.7439	NaN	NaN	NaN	NaN	23.7047	NaN	NaN	NaN	NaN	22.4133	NaN	24.1428	23.0401	22.9106	24.2267	23.8874	22.707	22.5361	NaN	NaN	NaN				4	4	4	5.2	5.2	5.2	160.61	0	25.106	242890000	32
23.9273	23.5053	30.5086	25.4387	20.107	24.6755	23.4801	NaN	25.638	23.7791	23.3307	NaN	NaN	24.4544	21.6479	24.7323	24.1856	25.1123	23.7932	22.9085	23.8077	23.3627	NaN	23.167	23.9643	24.5594	23.9066	23.6089	24.5595	NaN	24.5075	NaN	NaN	NaN	23.6513	24.6336				4	4	4	37.7	37.7	37.7	20.159	0	30.896	2337400000	61
27.1179	27.6725	29.3201	26.9714	27.7037	29.2358	28.4844	27.3745	27.9604	28.5578	28.9129	28.164	28.0702	29.1346	29.1532	28.3141	29.243	27.2456	26.6457	28.6465	28.3386	27.6417	27.2569	27.1964	27.2899	25.3766	28.7619	28.9298	26.2674	29.4083	29.7054	26.9118	28.9651	28.1354	28.2739	25.6946				11	11	11	22.7	22.7	22.7	74.139	0	323.31	15093000000	239
NaN	NaN	NaN	NaN	NaN	22.9096	21.5286	NaN	21.4306	NaN	22.4697	NaN	21.9049	21.5413	21.0649	NaN	25.5152	NaN	18.9065	20.8936	NaN	21.5599	NaN	NaN	20.8915	NaN	20.8776	22.7907	NaN	22.439	21.5606	NaN	21.8559	21.3863	NaN	NaN				9	9	9	6.2	6.2	6.2	279.67	0	22.731	170840000	33
NaN	NaN	27.2739	NaN	NaN	NaN	NaN	NaN	NaN	NaN	NaN	NaN	NaN	NaN	NaN	17.9869	NaN	NaN	NaN	NaN	NaN	NaN	NaN	NaN	NaN	NaN	NaN	NaN	NaN	NaN	NaN	NaN	NaN	19.0885	NaN	NaN				6	6	6	41.9	41.9	41.9	18.122	0	141.69	243670000	16
27.447	27.529	27.5408	28.217	26.9423	27.5055	26.9316	27.6566	29.3207	28.1356	28.8691	28.1237	28.5181	27.9935	28.1574	30.0081	29.3324	26.9786	27.1969	27.7797	28.7074	27.557	28.1831	27.4518	28.0151	26.7839	29.7725	28.2545	28.5773	29.2664	29.4364	27.3956	30.3879	28.1804	29.2872	27.939				14	14	14	43.8	43.8	43.8	30.777	0	323.31	17850000000	519
25.5673	23.9587	23.3978	25.4167	23.3892	24.3926	25.4693	25.8822	26.3064	24.8582	26.1717	26.6668	25.4676	25.0031	24.4385	24.4575	23.8845	25.2464	25.1747	24.6159	24.4518	23.8821	25.8666	24.0025	23.9945	23.6737	24.7185	24.5742	26.067	25.3898	25.6113	24.9384	25.9419	24.7523	24.4603	23.8899				4	4	4	20.5	20.5	20.5	36.154	0	323.31	1486200000	102
26.3198	25.2627	25.1937	25.7596	25.35	24.7123	23.2022	25.0436	25.2082	24.7241	25.9316	25.6211	25.5811	25.8409	25.2008	26.7594	25.2975	24.8104	25.5626	25.3331	27.6031	24.7023	26.5391	26.0873	26.1502	25.5298	26.501	26.263	27.6775	26.6455	26.5538	25.3482	25.8404	26.463	26.8278	26.4573				3	3	3	43	43	43	11.175	0	323.31	2768500000	99
NaN	NaN	NaN	NaN	NaN	NaN	NaN	NaN	NaN	NaN	21.3812	22.661	NaN	20.936	NaN	NaN	NaN	NaN	NaN	NaN	22.2788	NaN	22.0394	NaN	NaN	NaN	NaN	NaN	20.7848	21.4824	NaN	NaN	23.9091	NaN	NaN	NaN				2	2	2	23.8	23.8	23.8	11.284	0.00026838	4.5974	48922000	8
25.842	24.0559	NaN	26.2755	NaN	25.0553	NaN	NaN	26.4044	NaN	24.2938	25.7339	NaN	24.745	NaN	25.8368	24.9458	28.1675	24.1602	22.5032	24.4756	25.1224	NaN	25.2752	NaN	NaN	25.7742	25.9073	27.1437	NaN	26.0518	NaN	24.5901	25.7394	26.3614	24.2613				2	2	2	27.3	27.3	27.3	10.852	0	323.31	1981400000	37
25.7513	25.4109	26.5453	28.9479	27.5285	28.4168	29.0561	25.5938	28.4246	28.0323	29.5483	28.428	27.8428	29.2375	27.9212	27.3487	29.567	25.182	24.0246	26.9398	28.9855	26.7533	26.7128	26.0294	26.7403	24.9388	30.3463	27.5649	25.1585	28.534	29.5422	25.2503	29.9886	27.4251	31.7695	27.3904				14	14	14	21.5	21.5	21.5	94.972	0	323.31	17810000000	531
26.0908	25.7668	27.1262	28.9324	28.6077	29.5512	30.3899	26.3891	29.7916	28.8427	30.0735	28.8817	27.8445	30.0074	28.7285	28.3034	29.8272	26.5922	25.2176	28.2964	28.5082	27.2861	27.9427	27.4934	26.8525	23.6366	30.5178	28.2855	25.0885	29.1429	30.3458	25.5828	30.4316	28.3944	32.6509	29.3534				19	19	18	57.6	57.6	55.6	55.928	0	323.31	25434000000	566
23.068	23.0151	25.1104	27.6285	24.4846	28.2853	28.7804	22.2647	28.1904	28.2844	29.1994	27.6235	27.4746	29.5271	28.0481	25.7816	27.5037	23.6278	21.8418	27.1732	27.7932	26.0614	26.507	24.506	26.1891	24.0757	30.1273	27.2539	24.2529	28.3968	29.5663	22.5618	29.6016	26.8967	30.9083	26.6622				11	11	11	43.2	43.2	43.2	49.496	0	323.31	10911000000	286
23.2477	22.5927	23.133	22.8069	23.6831	NaN	23.0882	23.5362	21.621	22.7396	22.6204	22.9756	22.2309	NaN	21.7544	21.6359	NaN	24.0127	22.9285	21.6224	22.9267	23.103	23.1782	22.8298	23.0038	NaN	NaN	22.3225	23.6688	22.0224	22.0261	22.8203	22.1644	23.6717	21.0359	NaN				2	2	2	20.3	20.3	20.3	21.522	0	36.428	278070000	49
22.5527	NaN	22.0471	23.8336	NaN	23.9271	NaN	NaN	23.4987	NaN	23.8434	NaN	NaN	NaN	23.0041	NaN	25.4754	NaN	NaN	21.0234	22.9454	23.5679	20.4423	NaN	23.1036	NaN	NaN	21.1311	21.6301	NaN	NaN	22.3391	NaN	23.224	22.9024	NaN				2	2	2	26.5	26.5	26.5	13	0	87.173	242220000	15
NaN	23.7206	25.7279	26.3316	22.8322	27.4815	25.6841	22.7503	25.8716	23.6329	26.9764	24.2952	25.4586	26.5558	25.941	24.3362	29.5928	24.4833	22.0319	25.025	25.4986	26.0271	24.8997	24.477	26.1035	25.2497	24.6315	27.4908	23.6607	26.3388	25.6419	23.0065	26.2479	25.8169	25.6526	23.0077				10	10	10	22.2	22.2	22.2	101.79	0	293.63	4125300000	218
NaN	NaN	20.6143	25.2483	NaN	22.8854	24.8105	NaN	27.1581	19.4198	26.5474	23.0801	24.5181	26.1096	NaN	NaN	23.1486	NaN	NaN	NaN	22.7151	NaN	24.2512	NaN	22.1152	NaN	24.9126	NaN	NaN	NaN	21.9553	NaN	NaN	NaN	26.8546	25.5612				4	4	4	16.5	16.5	16.5	25.038	0	35.674	595520000	45
24.0705	23.0202	24.9845	25.5686	24.4219	24.8998	23.6821	NaN	25.9156	25.3657	24.8621	24.0096	22.9498	24.9317	24.075	25.1623	25.718	25.0542	23.8012	23.5445	25.9969	25.2562	24.548	23.6213	24.4566	23.8925	24.9939	25.3579	23.3839	25.9619	25.911	23.6625	26.5243	26.5041	26.1525	25.9114				4	4	4	20.6	20.6	20.6	25.387	0	261.34	1458800000	88
NaN	NaN	NaN	NaN	NaN	NaN	22.0677	20.6108	NaN	NaN	NaN	21.0124	25.8732	22.9096	NaN	NaN	NaN	NaN	NaN	NaN	NaN	NaN	NaN	NaN	NaN	NaN	NaN	NaN	NaN	NaN	20.7484	NaN	23.1977	NaN	23.8333	NaN				4	4	4	20.4	20.4	20.4	26.016	0	6.7268	117820000	13
25.8908	22.9909	22.658	25.7005	23.736	26.6287	27.1861	26.6653	25.7271	24.3029	26.3748	23.4343	28.549	25.5997	24.0593	24.8893	24.6161	25.7676	22.3425	25.8349	24.6074	24.3812	23.364	24.6241	23.8774	23.7366	24.9222	22.5645	26.045	24.5917	24.3424	NaN	25.8894	24.0184	26.2618	24.9153				4	4	4	27.3	27.3	27.3	26.721	0	323.31	2257300000	115
24.5321	NaN	NaN	24.0542	NaN	24.8294	25.7885	25.3127	24.4239	23.3337	26.0813	23.511	28.2657	25.2969	24.1581	23.1811	23.2988	24.1181	NaN	24.5312	23.8146	NaN	NaN	23.5398	23.6329	NaN	24.5039	23.8583	23.2471	24.8168	24.094	21.2392	26.5737	23.1881	25.5505	23.577				3	3	3	25.3	25.3	25.3	25.773	0	323.31	1150200000	35
23.1603	22.5211	24.0853	24.8333	NaN	24.3187	24.8889	22.9952	26.3361	25.1054	25.9887	24.2391	25.164	25.8394	24.8183	25.554	25.743	23.0155	22.5922	23.4504	25.3426	22.8948	23.6607	NaN	24.262	23.8131	26.3825	24.0306	22.4879	25.5415	25.9711	NaN	26.4067	24.8067	26.751	24.1181				6	6	6	18.6	18.6	18.6	63.173	0	323.31	1248400000	85
NaN	22.3258	23.1038	23.6638	22.1958	23.6872	NaN	23.4238	25.2123	23.9751	24.5263	22.0273	23.5591	NaN	22.768	23.6447	25.5257	NaN	22.8911	22.6904	23.3923	23.4586	22.4435	22.5146	22.882	NaN	24.7756	23.5331	NaN	24.4749	23.9728	21.38	26.3859	22.5449	24.3015	NaN				6	6	6	26.7	26.7	26.7	38.298	0	17.47	579890000	46
22.6655	24.7274	NaN	26.4151	24.7372	23.0831	25.8115	21.4287	27.563	24.3047	27.082	25.8958	25.839	26.3031	23.714	27.2448	26.8428	23.1943	NaN	20.3466	26.4036	NaN	25.4103	NaN	24.5282	NaN	25.8217	23.0561	22.7497	24.0402	24.3797	NaN	25.2848	22.5692	27.148	26.472				6	6	6	32.9	32.9	32.9	38.177	0	94.83	1970100000	103
28.8794	27.4347	29.3944	29.3864	28.294	30.0996	29.4099	29.252	31.4441	30.143	30.3305	29.9293	29.7135	31.1185	29.347	29.6178	30.51	27.7854	29.1934	30.1273	30.0942	28.3438	28.8545	28.4512	29.6861	24.1648	32.609	29.6934	28.0361	30.6508	30.947	26.9242	31.1454	28.8051	31.7385	28.7544				47	47	2	36.6	36.6	1.3	259.21	0	323.31	47469000000	1502
25.2309	24.9787	25.3274	26.1345	26.0146	25.2829	25.2053	25.2353	27.1566	25.3202	26.1778	25.7964	25.4634	25.7912	23.8649	26.7086	26.9172	25.9365	24.9044	24.5732	25.9869	25.7366	25.055	25.6078	25.868	24.5074	25.0436	25.2355	25.4228	25.7664	25.5671	24.01	26.379	25.685	26.0852	26.2201				7	7	7	29.8	29.8	29.8	38.999	0	105.26	2541500000	203
29.9289	27.8661	26.0791	29.7648	27.8701	28.7061	30.0363	27.5116	31.4369	28.0613	30.5093	28.3574	27.3342	29.6541	27.9401	29.9599	27.3487	28.4661	26.9107	25.4774	28.205	27.0677	30.1127	25.8928	28.6037	27.7913	27.7737	27.38	29.9629	27.6076	28.1314	25.7934	25.6359	29.0501	29.1553	31.2873				7	7	5	40.8	40.8	32.3	23.511	0	323.31	20314000000	225
27.4103	26.0463	26.3854	26.6625	26.1912	26.7975	NaN	26.695	28.5254	27.5744	27.6891	27.36	27.754	26.9479	26.7095	28.3432	28.0129	25.7295	26.0365	26.1358	27.2258	27.2474	26.0925	26.1004	27.5637	26.3502	27.2584	26.7442	27.396	27.6016	27.7803	27.1166	28.5027	27.4357	28.0141	24.8948				6	6	6	38.1	38.1	38.1	39.34	0	323.31	7206400000	138
27.459	25.7634	25.786	26.1616	27.093	26.7804	23.0559	26.9263	27.8522	27.6796	26.7223	26.7861	27.5067	26.2888	25.8928	28.3149	27.5351	25.801	27.4157	26.5142	27.9793	27.8003	27.5787	27.3467	27.9976	27.2837	25.4546	27.1806	29.0984	26.9819	27.6408	27.1742	28.6251	28.5183	27.8231	26.4049				9	9	9	65.3	65.3	65.3	15.887	0	254.2	7401800000	196
25.0812	22.0097	23.7493	24.6105	21.9885	24.7584	23.9051	23.5637	26.9387	25.8324	26.4151	25.0616	25.9101	26.8584	25.8966	25.6847	26.3266	22.1842	21.8851	24.8811	24.8931	24.1516	23.8579	NaN	25.1066	23.451	27.4041	24.4854	24.1758	26.7338	27.5287	20.545	27.5741	25.1637	26.7451	24.2886				10	10	10	35.4	35.4	35.4	52.917	0	323.31	2129700000	128
25.6673	23.7024	24.2854	25.2918	25.4578	25.4328	26.186	24.909	25.9461	24.3621	25.539	24.4487	24.7429	24.4672	23.9457	22.8834	23.9049	24.58	25.1234	26.1382	25.2602	24.1483	26.6309	24.1155	23.843	24.284	26.5881	21.9268	24.6064	23.0568	22.9183	25.0271	24.4686	24.1143	24.7445	25.0495				11	11	11	20.5	20.5	20.5	84.87	0	76.823	1242900000	105
27.6737	26.5634	27.9455	27.0749	27.3298	28.0104	26.6382	27.8782	29.7738	28.2902	28.9303	28.1721	29.3529	28.6235	29.4228	29.5072	29.6223	26.259	26.9467	28.6986	28.4645	27.2394	27.5873	26.9854	28.4804	27.2195	29.6381	28.1758	28.2537	28.7365	29.7131	26.8784	30.5753	28.0946	28.9268	27.1792				19	19	19	36.2	36.2	36.2	77.063	0	323.31	17901000000	542
20.0747	NaN	25.9766	24.8655	22.0774	25.2808	22.45	18.4284	30.2888	25.1098	28.1604	29.4846	23.3941	23.7457	26.8808	20.3788	27.6103	NaN	22.2471	18.5592	24.3962	24.3731	NaN	NaN	26.8335	NaN	29.1362	24.41	19.0293	22.261	28.6885	24.4701	27.9889	27.5834	23.123	29.6329				25	25	25	52	52	52	73.16	0	323.31	6022100000	376
27.3905	26.4282	26.4217	28.058	26.4516	27.4118	28.2819	26.2589	29.6143	28.353	29.0416	28.2447	28.5312	29.0373	28.033	29.5288	28.8474	25.4365	26.5878	26.9795	28.7927	27.0458	27.8203	NaN	27.6584	26.2464	29.2829	27.1474	27.8121	28.7853	28.7452	25.8937	29.6967	27.6837	28.9724	27.926				13	13	13	36.8	36.8	36.8	51.676	0	323.31	13671000000	395
32.3272	29.9163	29.3803	31.128	30.4215	30.7643	31.4796	31.9867	31.8049	31.1121	31.2166	30.0431	29.0071	31.5857	28.1271	30.6944	27.7391	31.5182	31.2166	30.1952	30.8093	30.194	31.3111	28.2044	30.058	30.4049	28.1921	29.6327	31.4098	30.379	29.735	30.626	30.5223	31.4322	32.324	29.2353				7	7	7	43.4	43.4	43.4	20.019	0	139.69	71939000000	343
27.5694	26.3127	26.392	25.7859	24.8762	26.6213	27.567	25.8191	23.8338	26.3299	24.0976	26.0895	24.7045	26.4016	23.6865	25.7608	26.1764	27.5774	27.512	25.4266	25.9317	25.2513	26.2092	NaN	25.4047	26.2504	24.3878	25.3125	28.3991	25.3927	25.7674	26.6725	26.0312	27.2248	26.2935	26.0924				4	4	4	24.6	24.6	24.6	21.225	0	34.406	3231500000	69
NaN	NaN	NaN	NaN	NaN	NaN	NaN	NaN	25.5655	NaN	NaN	NaN	NaN	NaN	NaN	NaN	NaN	NaN	NaN	NaN	NaN	NaN	NaN	NaN	NaN	NaN	24.8893	21.6844	NaN	NaN	NaN	NaN	NaN	NaN	NaN	NaN				3	3	3	7.5	7.5	7.5	54.006	0	12.951	83357000	6
NaN	24.8339	24.1765	25.77	23.493	24.09	22.5515	22.4133	26.018	24.675	26.252	25.0952	24.8762	26.4063	24.6118	26.1379	26.488	22.9058	22.6932	24.1561	25.4629	24.1562	22.5521	NaN	24.4166	NaN	26.2926	23.6861	20.8359	25.6773	25.789	23.3612	27.7598	24.7216	25.8879	24.7909				7	7	7	14.7	14.7	14.7	67.033	0	323.31	1831500000	88
26.775	26.8135	27.969	27.2994	27.1344	29.2522	28.4136	27.3347	28.7448	28.2366	28.9038	28.6145	27.7992	27.5569	27.0082	29.0382	27.4688	27.6361	27.3341	26.8005	28.2353	27.2201	28.0147	27.7461	27.0811	26.3423	28.2891	28.1017	27.9814	27.7391	29.1885	27.4449	28.8425	28.6278	31.1057	29.6973				6	6	6	19.7	19.7	19.7	54.305	0	323.31	13900000000	372
27.34	28.0075	27.2105	28.8816	27.6711	27.8923	27.3315	27.4116	28.7997	27.1454	27.1936	27.2062	27.4359	29.0737	27.8802	27.9979	27.5595	27.0082	26.9597	27.3283	27.9025	27.6649	27.0057	27.799	27.2723	26.8573	27.8188	28.0743	26.5916	27.8868	27.7531	27.7267	27.7813	27.8683	28.4097	28.7492				11	11	11	30.6	30.6	30.6	59.755	0	254.91	10538000000	454
NaN	NaN	NaN	NaN	NaN	NaN	NaN	20.8952	NaN	NaN	NaN	22.4526	NaN	NaN	NaN	21.4688	NaN	NaN	NaN	NaN	NaN	NaN	21.5299	NaN	NaN	NaN	NaN	NaN	20.6901	NaN	NaN	NaN	NaN	20.513	NaN	NaN				3	3	3	10.9	10.9	10.9	50.316	0.00026759	4.5734	19884000	8
25.2	22.9693	25.1625	25.2898	25.4087	24.6843	24.3762	25.2962	24.0695	25.0611	24.2397	23.9617	24.3287	24.7896	25.4206	26.254	25.1611	24.3444	25.6422	24.8871	23.3825	24.6328	26.0222	24.1327	25.3358	25.0566	23.8417	25.127	24.2509	24.9015	24.2821	24.7645	23.6785	24.8759	22.9984	24.5072				7	7	7	27.3	27.3	27.3	53.688	0	132.35	1346200000	131
30.3753	28.2781	29.4753	29.4226	29.7089	29.144	28.8773	29.8295	29.305	29.6257	29.4511	29.9287	29.6554	29.6108	29.5923	28.4863	28.833	29.0939	29.3418	29.0622	28.5044	29.3766	29.5412	29.2294	29.1946	30.4107	29.4078	29.2209	30.0373	29.0005	29.0649	29.9725	29.4386	29.4503	30.3147	29.6549				13	13	11	53.6	53.6	45.9	39.42	0	323.31	35605000000	562
30.788	28.4485	28.3751	27.8852	27.9735	29.9582	28.3643	29.8445	29.2924	28.2393	28.3003	27.4509	27.9213	27.8601	27.4647	27.7542	26.7778	29.1234	28.5064	28.3158	27.4551	28.3291	29.0651	28.7398	27.8573	28.6554	25.9037	28.1747	29.7851	27.354	27.4622	27.9751	27.8176	27.4416	29.992	28.73				4	4	4	56.1	56.1	56.1	11.139	0	323.31	16365000000	161
28.4376	27.9761	29.2036	29.6124	29.1166	28.9976	29.0678	28.1267	30.0991	28.2282	29.3622	29.0613	28.6957	30.4203	28.59	29.4346	29.5228	28.1593	28.1129	28.813	29.1776	28.299	28.0687	29.002	28.9475	27.9284	29.5576	28.8096	28.2636	28.8006	29.0021	28.2176	29.4027	28.7721	29.73	30.1938				18	18	18	55.8	55.8	55.8	38.714	0	323.31	25903000000	815
19.319	NaN	25.0082	24.6837	22.2139	23.8433	23.9716	21.4087	27.8112	23.63	25.8879	25.0043	25.1889	27.6504	23.9742	25.8516	26.3109	24.1772	24.384	23.9247	23.4239	22.6513	NaN	NaN	25.3316	23.9802	27.5598	25.2029	22.8054	27.4727	26.1964	22.0063	28.8074	24.3005	27.2911	23.9102				53	53	53	17.6	17.6	17.6	515.6	0	323.31	2539400000	321
29.3156	27.4844	28.1108	28.0753	27.7319	30.6063	30.6706	31.0232	29.4126	28.3688	28.2135	29.0391	28.8807	27.724	27.9875	28.598	28.2601	29.2393	27.5421	29.9399	28.6346	27.8709	29.1168	27.9538	27.3172	26.2069	29.0385	28.3354	29.6292	28.7031	29.0445	27.9842	28.2077	27.5505	28.2848	28.6167				5	5	5	53.4	53.4	53.4	19.73	0	323.31	20595000000	338
NaN	NaN	NaN	NaN	NaN	NaN	22.3107	22.0731	21.2022	NaN	21.682	20.9297	22.2092	21.7882	NaN	22.5575	NaN	NaN	NaN	21.7471	21.1201	NaN	NaN	NaN	NaN	NaN	22.0281	20.9773	21.575	21.4605	21.3534	NaN	21.6838	NaN	21.8133	NaN				3	3	3	24.9	24.9	24.9	32.853	0	11.679	67919000	20
22.8795	24.3672	24.1851	24.0656	23.9283	23.7033	23.142	23.7891	25.4452	24.0679	24.6132	24.5048	24.2762	23.4529	23.2764	25.2082	26.831	22.3606	23.8046	23.4801	23.7509	23.9403	23.4875	23.274	23.7452	22.5065	24.3905	24.422	24.3245	24.8465	24.4934	22.7884	26.4446	24.3324	27.2736	24.5541				6	6	6	14.1	14.1	14.1	59.578	0	164.74	1189300000	171
28.3648	27.5592	26.514	28.6796	28.4204	27.2128	25.88	26.3838	28.4226	27.6065	27.2281	26.6411	25.991	28.3003	26.5683	27.2834	27.4852	27.8987	27.7858	25.809	28.2238	27.3762	26.6706	26.9824	27.5645	26.0673	26.1326	27.282	27.0157	26.9023	26.7125	26.7749	27.4015	27.3416	26.3381	27.6754				3	3	3	24.2	24.2	24.2	17.935	0	265.83	7405500000	113
26.7991	27.2333	26.3897	27.897	26.5096	26.895	26.37	26.2536	28.7204	26.388	27.7251	27.0905	27.2454	26.8711	26.1084	28.2768	28.2012	25.2231	26.0365	25.4808	27.805	25.7084	26.3616	25.3205	26.6442	26.2753	27.2761	26.2924	26.6421	27.0739	26.8519	25.2932	28.1321	26.6688	28.2047	26.6665				11	11	11	32.3	32.3	32.3	54.253	0	323.31	5983900000	231
27.1211	26.9661	28.4036	27.3619	27.8586	27.8187	28.0992	27.033	26.2304	27.3075	27.0425	26.0446	26.6939	27.0738	27.7152	26.9338	27.2082	27.6267	27.6761	28.3123	27.6387	27.2831	27.5617	27.5054	26.622	27.4024	27.3401	27.9739	27.1299	27.5764	26.307	26.6749	26.0339	27.3285	27.044	26.8096				6	6	6	27.6	27.6	27.6	26.398	0	323.31	7975200000	196
23.4444	23.2036	23.5874	24.0566	23.634	22.3206	22.0034	21.8782	22.1208	23.542	23.451	22.4621	25.9797	NaN	22.7206	23.297	22.5897	25.2292	23.7328	22.5052	23.0762	24.0238	23.1167	23.7137	23.0569	21.9368	21.5115	22.8576	23.3859	23.3519	23.5546	23.7065	23.4105	25.5252	22.9808	NaN				4	4	4	45.7	45.7	45.7	10.713	0	9.6539	626070000	57
NaN	NaN	22.0907	23.4031	NaN	25.5143	23.9252	NaN	24.2817	22.3856	24.6735	22.9057	24.9232	26.1944	24.8751	23.394	25.0156	24.0476	NaN	21.4858	24.3606	23.42	NaN	NaN	21.441	NaN	23.5717	23.6254	21.4143	24.545	23.5651	20.9997	24.0858	21.7889	22.9559	NaN				10	10	10	5	5	5	309.26	0	59.051	551810000	93
NaN	NaN	NaN	NaN	NaN	NaN	NaN	NaN	23.3437	NaN	NaN	NaN	23.1155	NaN	NaN	25.2513	22.9072	NaN	NaN	NaN	NaN	NaN	NaN	NaN	NaN	NaN	22.0609	20.9981	21.5956	NaN	23.2014	NaN	NaN	NaN	23.0538	NaN				6	6	6	23.4	23.4	23.4	43.779	0	14.01	144590000	13
28.2173	28.6979	28.6045	28.8709	28.4662	28.4469	28.4245	28.1387	28.5534	28.5293	28.1227	29.255	28.6059	28.1477	28.1467	28.8129	29.1944	28.9738	28.2503	28.0683	28.3188	28.0959	28.3506	28.8188	28.4137	28.9109	28.8418	28.0339	28.1856	28.5773	28.5129	28.8203	28.6691	28.5932	29.5443	28.7587				19	7	3	67.3	27	10.1	49.585	0	308.89	23583000000	480
32.9613	31.8018	32.3973	32.4464	32.2045	32.4265	31.8484	32.6853	32.4591	32.7376	32.3104	32.8725	32.2128	32.2034	32.2292	32.0928	31.7126	32.1682	32.3683	32.4833	31.9456	32.5013	32.9158	32.1425	32.4378	33.019	32.5137	32.3057	32.7049	32.3891	32.4524	32.7397	32.2671	32.5105	32.4834	32.7939				15	15	15	71	71	71	36.053	0	323.31	270820000000	1994
22.2542	22.6119	23.1761	22.9281	23.1503	22.6548	22.7518	22.9675	23.0512	22.8042	22.0529	22.4875	22.9582	22.9046	22.2776	22.7185	21.788	22.5663	22.8609	22.4964	23.0128	22.974	22.3067	22.3581	22.9534	23.5667	22.6599	22.3899	22.2508	22.199	22.2906	22.2626	22.6941	22.6176	22.2761	23.6506				4	4	4	13.8	13.8	13.8	51.657	0	15.519	263810000	64
25.3525	24.0258	NaN	23.5387	23.321	24.2628	25.0411	23.4109	25.8814	24.3475	25.5219	24.5216	25.4839	26.0398	24.2921	25.4574	20.3933	24.9311	24.0803	24.5218	24.4134	24.6726	23.4548	23.1547	24.2661	23.2594	25.7443	24.2186	24.2996	25.1213	24.3889	NaN	26.431	25.7476	24.47	25.1593				2	2	2	33.9	33.9	33.9	12.575	0	24.248	1124300000	60
23.9846	NaN	NaN	NaN	NaN	NaN	NaN	NaN	NaN	NaN	NaN	NaN	NaN	23.14	23.9447	NaN	NaN	NaN	NaN	NaN	NaN	NaN	23.1265	NaN	NaN	NaN	NaN	24.0388	NaN	NaN	NaN	NaN	NaN	NaN	NaN	NaN				4	3	3	20.9	17.4	17.4	29.159	0.0066138	2.1302	95988000	5
27.7184	28.9942	27.9744	28.0418	28.298	27.5969	27.8409	27.6255	27.7152	27.558	27.5549	27.3048	27.3434	26.8851	27.0189	28.363	28.5418	27.9285	28.1095	27.1049	28.702	28.0736	28.0578	28.6548	27.7015	28.3864	26.6043	27.8039	28.0796	27.2808	26.9029	28.0001	27.4134	27.6453	27.6277	27.9028				11	11	11	76.1	76.1	76.1	28.315	0	323.31	13306000000	712
31.2874	30.1458	31.4464	30.5866	29.9083	31.2151	31.5411	30.5676	30.4008	29.84	30.7359	30.5481	29.9875	29.7719	29.4365	30.0196	29.836	30.5913	29.7951	29.2402	30.8514	29.5368	30.0335	30.0362	29.7401	28.591	29.5618	29.9507	29.9647	29.7028	30.1513	29.6989	30.1828	29.559	31.021	31.388				11	11	11	70.7	70.7	70.7	22.782	0	323.31	57616000000	848
21.3167	21.2105	NaN	22.1035	21.6619	21.2755	NaN	20.918	NaN	21.3788	20.8893	NaN	20.5502	NaN	NaN	20.5252	NaN	NaN	21.6365	20.557	20.7664	21.258	21.7256	NaN	20.7582	20.5617	NaN	NaN	NaN	NaN	NaN	21.951	NaN	21.21	21.5785	21.6804				4	4	4	16	16	16	35.716	0	88.766	57358000	28
25.858	25.8665	25.6137	25.4816	25.2472	26.3155	25.1567	26.3377	26.0507	25.0857	25.0486	25.0895	24.9979	25.8266	25.8308	25.8852	24.9737	26.1742	25.3519	26.4708	25.0928	24.8597	25.5178	24.3797	25.0737	25.4119	25.0053	25.0555	26.1471	24.2425	25.4928	25.0669	24.8187	25.3437	25.6153	26.0786				8	8	8	21.4	21.4	21.4	65.335	0	168.72	2034800000	125
26.08	26.24	27.4781	27.0526	26.9381	27.5196	27.9154	27.089	27.2182	27.0559	27.9488	27.2754	27.4274	28.3077	27.536	27.5005	27.8206	26.9996	26.6917	27.6203	28.0052	26.7953	26.6722	26.7599	27.1437	26.4814	28.8563	27.5746	26.2088	28.0085	27.8595	26.1769	28.2072	27.1814	27.4754	26.5868				18	18	18	46.3	46.3	46.3	68.569	0	323.31	7442800000	386
25.5891	26.0243	26.6721	25.7897	27.521	27.2285	27.2148	26.4658	27.363	26.5165	27.6218	26.8411	27.0083	27.3546	26.972	27.7505	27.5972	26.2913	25.072	27.479	27.6081	25.0849	26.0827	25.2217	26.9825	26.225	28.377	27.1694	26.0461	27.4609	27.2074	26.1138	27.6654	26.4622	27.9727	26.9601				20	20	20	61.5	61.5	61.5	69.283	0	323.31	5756600000	324
29.3769	29.2619	28.7632	28.6191	28.7341	29.0977	28.849	29.593	29.163	29.2077	29.0729	29.1635	29.8536	29.8218	29.4637	28.6229	28.8309	29.1448	28.8978	29.1836	28.6891	29.1678	28.8986	28.8967	28.993	29.2379	28.6288	29.0209	29.2532	28.7903	28.7883	29.1356	29.0406	29.3748	29.123	28.4186				12	12	8	47.9	47.9	33.5	40.45	0	323.31	24626000000	852
34.1074	34.7632	34.4597	33.7787	33.9683	33.5135	33.3406	33.8801	33.1476	34.1398	34.0581	33.3905	33.962	33.0098	34.5239	34.9335	34.0464	33.362	34.0222	34.7296	33.6831	34.672	33.2756	34.7434	34.165	32.9556	33.4337	34.8067	33.6577	34.2897	34.2131	34.3122	33.4057	34.0163	33.0513	32.2402				11	11	3	61.5	61.5	23.1	14.105	0	323.31	814340000000	2768
NaN	NaN	22.9334	NaN	NaN	NaN	NaN	NaN	NaN	NaN	NaN	NaN	NaN	NaN	NaN	NaN	NaN	NaN	NaN	NaN	NaN	NaN	NaN	NaN	23.1022	23.0088	NaN	NaN	NaN	NaN	NaN	NaN	NaN	NaN	NaN	23.1359				2	2	2	2.2	2.2	2.2	135.6	0.0002686	4.6127	21893000	4
27.4648	26.9298	26.7184	27.2223	27.3688	27.1833	27.0877	27.4836	26.544	27.2028	26.9611	27.3869	26.5829	26.9342	26.9937	26.4362	26.4667	26.943	27.3714	27.501	26.8434	27.0966	27.1577	26.3731	27.134	27.6599	27.2463	26.697	27.181	26.8566	26.8437	27.2801	26.9104	27.2716	26.4777	26.3354				17	17	16	24.8	24.8	24.1	109.55	0	323.31	5550100000	345
NaN	NaN	NaN	NaN	NaN	NaN	NaN	21.9107	22.6508	NaN	21.3224	21.7877	20.024	NaN	NaN	NaN	25.6392	19.5924	20.436	NaN	20.3687	NaN	21.3749	22.2612	21.3614	NaN	20.9578	NaN	NaN	NaN	NaN	NaN	21.303	NaN	22.4341	25.5997				6	6	6	29.1	29.1	29.1	35.664	0	31.499	204490000	27
24.2336	NaN	NaN	23.5292	24.0697	NaN	24.8598	NaN	25.1474	NaN	NaN	NaN	NaN	NaN	NaN	23.462	22.8735	NaN	NaN	22.2076	23.24	23.9059	24.0069	NaN	22.9698	22.5585	NaN	NaN	22.4801	22.7577	NaN	NaN	23.7511	NaN	24.5417	24.3841				2	2	2	12.7	12.7	12.7	21.275	0.00050063	3.4152	262270000	17
22.6671	21.9807	25.8231	23.707	NaN	26.4447	24.8298	26.3384	24.5907	25.2283	25.8885	25.0765	25.8598	25.5473	26.1923	24.6909	24.9166	24.7209	21.5899	26.274	25.3793	24.8289	25.13	24.7387	24.3395	22.4206	26.0685	25.5047	24.9652	25.8455	26.4556	24.7197	25.3972	24.4292	25.1059	NaN				10	10	10	32.9	32.9	32.9	56.381	0	117.92	1708400000	215
28.1869	27.6727	27.8834	27.6538	27.6629	27.8858	27.6687	27.8618	27.729	27.5601	27.4136	27.8469	27.5655	27.7615	27.3153	27.2025	26.2616	27.7445	27.9413	28.3132	26.9602	27.7462	27.9739	27.2352	27.6747	28.2491	27.1342	27.4682	28.1397	27.3334	28.037	27.9381	27.3318	28.0975	27.9204	27.9381				16	16	16	32.4	32.4	32.4	84.781	0	323.31	9022200000	461
31.1385	29.6612	29.2113	30.4346	29.1119	30.9635	31.9109	31.2019	33.3842	30.1101	32.1509	31.4531	31.1826	31.5994	30.1147	29.6516	31.1923	31.0763	28.1301	29.1433	29.9928	29.475	29.4602	30.2644	30.7223	26.7542	31.0384	29.1958	31.3817	27.7707	30.0097	30.0172	30.9387	30.1306	31.1174	33.9793				7	7	7	69.9	69.9	69.9	10.834	0	323.31	82108000000	706
NaN	NaN	NaN	NaN	NaN	NaN	NaN	NaN	NaN	NaN	NaN	NaN	NaN	NaN	NaN	NaN	22.0674	NaN	NaN	NaN	NaN	NaN	NaN	NaN	NaN	NaN	NaN	NaN	NaN	NaN	NaN	NaN	NaN	NaN	21.4106	NaN				2	2	2	13	13	13	46.596	0.00026846	4.5979	9339600	3
23.3188	23.8787	24.8736	24.7516	24.7439	23.5538	25.1426	25.7017	23.1784	24.8399	24.5707	24.1972	23.8029	24.6814	25.7411	24.1174	23.4358	24.7988	24.4164	25.3919	24.3869	24.0501	24.5495	24.8605	23.9198	21.5152	25.1138	24.8924	23.2623	25.4929	25.4798	23.2564	24.6573	25.1949	24.8565	22.9955				8	5	5	25.8	15.8	15.8	32.852	0	194.18	1093600000	164
NaN	NaN	NaN	NaN	NaN	NaN	NaN	NaN	NaN	NaN	NaN	NaN	NaN	NaN	NaN	NaN	19.0422	NaN	NaN	NaN	NaN	NaN	NaN	NaN	20.5983	18.8955	NaN	NaN	NaN	NaN	NaN	NaN	NaN	NaN	NaN	NaN				3	3	3	8.4	8.4	8.4	45.674	0.0097046	1.7588	11693000	6
26.5926	22.69	23.8865	26.7473	21.9203	26.5349	25.909	26.2972	28.2171	25.2353	26.104	25.9572	26.2532	27.5245	24.7949	26.6455	26.7633	25.747	24.8065	25.4097	25.9435	22.8923	25.9563	23.9389	25.6908	23.0903	25.7586	24.2164	25.1696	25.7082	26.3316	22.2129	26.8451	25.4559	27.3353	24.349				10	10	10	31.9	31.9	31.9	49.757	0	65.454	2611100000	142
22.8884	23.8819	22.715	24.4536	23.328	22.881	22.0593	21.4807	24.5183	23.5107	23.9688	23.4037	22.9276	24.6565	22.8131	24.1871	24.4848	22.1292	22.2528	22.136	24.1194	22.5686	23.1741	NaN	21.73	21.6167	24.6625	22.5894	NaN	22.9157	23.5394	NaN	25.3652	23.2661	23.7472	23.1176				6	6	6	14.6	14.6	14.6	65.75	0	244.18	455760000	98
24.4305	23.8542	23.2507	23.1059	23.5999	25.4372	23.4694	23.6517	23.6854	23.265	23.0781	23.2217	24.1619	22.9954	24.5098	24.5725	24.3977	24.4615	23.6174	23.4375	23.1159	22.5876	24.3397	24.7189	22.7236	23.7065	23.097	23.7528	23.8833	22.9725	23.5327	23.1094	23.8118	24.246	25.3204	22.6198				4	4	4	30.9	30.9	30.9	17.887	0	88.348	649560000	53
24.1548	NaN	NaN	NaN	NaN	NaN	NaN	NaN	NaN	NaN	NaN	NaN	NaN	NaN	21.6305	NaN	NaN	NaN	NaN	NaN	NaN	NaN	NaN	NaN	NaN	NaN	NaN	NaN	23.6374	NaN	NaN	20.0379	NaN	NaN	NaN	NaN				2	2	2	22.7	22.7	22.7	14.644	0.0019111	2.822	41716000	3
28.6749	29.7746	28.9957	31.1074	29.2664	30.4629	30.9052	27.9524	33.3788	29.2944	31.1679	32.0178	28.5995	29.1391	28.7698	29.5414	30.9227	29.8909	29.6045	26.6796	30.2841	29.9937	29.0582	27.2475	30.9401	26.7031	30.2849	28.9142	28.3234	27.6189	30.1673	30.1408	30.9172	30.4111	29.3159	34.7725				33	33	30	60	60	54	73.853	0	323.31	70365000000	1182
NaN	NaN	NaN	NaN	NaN	NaN	NaN	NaN	NaN	NaN	22.1334	NaN	NaN	21.9151	22.1426	NaN	21.453	NaN	NaN	22.252	NaN	NaN	NaN	NaN	NaN	NaN	20.5422	NaN	NaN	21.545	21.6073	22.462	21.8283	21.2233	NaN	NaN				3	3	3	7	7	7	75.001	0.00025727	3.842	46563000	9
21.6464	21.864	22.6932	21.0411	NaN	NaN	22.7288	21.8737	21.0263	NaN	22.4598	22.3265	22.7765	22.462	22.4242	NaN	21.9479	22.7866	NaN	22.684	21.7428	21.7758	NaN	21.6036	NaN	NaN	23.1023	22.1758	NaN	23.1624	21.8839	21.7209	22.4285	21.8689	20.8231	NaN				9	9	9	27.1	27.1	27.1	58.215	0	15.835	149330000	49
NaN	NaN	22.312	NaN	NaN	NaN	22.8209	NaN	25.4445	21.0379	21.4946	NaN	24.4225	NaN	NaN	22.7741	22.6201	NaN	23.2366	NaN	21.5963	NaN	NaN	NaN	NaN	NaN	23.2819	NaN	21.4234	20.7503	23.9582	21.4114	NaN	NaN	NaN	24.1475				6	6	6	20.4	20.4	20.4	57.304	0	21.487	167250000	30
25.9428	23.2362	25.5502	25.7797	25.9077	25.43	25.5051	25.8979	24.8985	24.2621	24.4519	24.4534	24.6482	24.914	25.6427	24.1662	24.7831	25.8617	25.2139	25.5347	22.7509	25.6803	25.4974	25.9045	24.6639	24.9173	24.2866	24.971	25.5416	23.4702	24.5628	24.9867	23.7743	24.9849	26.1324	25.636				9	9	9	44.1	44.1	44.1	36.112	0	167.09	1520500000	123
27.6183	25.9295	25.673	26.4495	26.2604	27.7189	27.1128	26.7042	26.8294	25.8387	27.1291	26.1356	25.6048	26.2174	25.4865	25.6977	25.4112	26.7473	26.0147	26.832	26.1737	26.1894	26.2185	26.3627	25.5912	25.5642	25.65	25.4474	27.0207	25.032	26.1525	25.8896	25.5828	26.1404	28.6699	27.1437				9	9	9	24.2	24.2	24.2	57.825	0	244.49	3481600000	303
30.9449	29.3209	29.3399	30.0927	30.5389	29.4063	29.9693	28.4717	30.4229	30.044	30.2195	29.3941	29.3252	28.7333	29.2433	30.7337	29.0072	30.1622	30.3337	29.2056	30.4438	30.0851	30.1988	30.322	30.1635	30.6568	28.321	30.1368	31.1937	28.6508	28.5218	29.9751	29.7824	30.4782	29.6188	30.257				5	4	4	94.7	79.8	79.8	11.514	0	323.31	40946000000	351
30.9786	29.4773	28.6127	29.4452	29.8074	29.317	29.2916	29.1565	29.3284	29.3508	28.956	29.4978	28.7657	28.7037	28.8513	29.6127	28.7624	29.9242	29.1526	28.5539	29.4873	28.6372	28.9334	29.6992	28.7177	29.9285	28.2338	29.3024	30.3032	27.9638	28.4017	29.443	28.8346	29.4765	29.6852	30.0503				7	7	6	85.2	85.2	70.4	11.665	0	323.31	28731000000	615
28.7581	27.9769	28.1831	28.4882	28.5904	28.3842	28.3861	28.297	28.8935	28.4102	28.2096	27.8891	28.7225	28.4041	28.651	27.8363	27.9329	28.6151	28.5616	28.3118	28.6177	28.8348	28.6544	28.6979	28.3869	28.438	28.0445	28.713	28.4847	27.757	28.067	28.7982	27.9623	28.437	28.6118	28.6923				9	9	3	44.2	44.2	18	34.273	0	323.31	15042000000	607
26.6705	22.176	25.0729	23.6327	23.6577	23.7825	23.9088	22.6923	23.5146	NaN	23.748	22.1319	20.4837	23.294	21.7157	22.3403	22.6741	22.8451	21.4112	21.9287	23.1291	22.1204	24.1107	23.5104	23.3761	22.4681	20.6903	23.5613	22.6316	20.6634	20.6432	23.2266	21.8798	22.3337	23.3803	21.7365				5	5	5	35.3	35.3	35.3	14.858	0	12.743	376790000	71
21.0895	NaN	21.5364	21.9467	NaN	21.9969	22.4461	NaN	23.2324	23.2348	23.3257	23.3481	21.914	23.5302	22.3535	23.8852	23.7496	NaN	NaN	NaN	22.4531	22.5447	22.3498	NaN	23.7254	NaN	24.4166	22.4464	21.1161	25.098	24.5508	21.9724	25.0492	23.669	23.6454	NaN				3	3	3	22.3	22.3	22.3	22.537	0	30.262	370250000	34
25.0592	25.5822	24.689	25.0022	24.839	25.6654	24.7406	25.1404	24.1777	25.0113	24.7639	25.1852	24.7148	25.2758	25.3548	25.5261	25.8245	24.3437	24.5561	25.5148	25.6522	24.8986	24.7113	24.0212	25.0279	25.4015	25.0749	25.1578	24.8625	24.8463	24.8999	25.0661	24.765	24.3352	25.7376	25.3371				7	7	7	19.9	19.9	19.9	46.836	0	323.31	2015700000	319
NaN	NaN	NaN	NaN	NaN	NaN	NaN	NaN	23.8659	NaN	22.1648	NaN	NaN	NaN	23.2588	22.5384	NaN	NaN	20.0632	NaN	21.0695	NaN	NaN	NaN	21.594	NaN	23.1562	22.5912	21.4008	22.6616	22.8351	NaN	23.3713	NaN	23.4268	NaN				6	6	6	13.8	13.8	13.8	57.07	0	12.301	127380000	24
24.6405	23.5956	23.6847	24.6183	24.2799	25.6969	24.8588	24.5019	25.562	24.3819	23.8963	24.4713	24.7627	26.2777	25.7273	23.9005	25.2866	24.2775	23.2557	24.3232	24.7545	24.497	23.9483	23.8802	23.8976	23.296	25.6658	24.87	24.2425	25.1678	24.6745	23.7504	24.7675	24.5741	24.1948	23.1125				6	6	6	12.2	12.2	12.2	87.445	0	11.016	1092300000	87
23.1591	25.2276	25.3558	23.4876	24.7335	21.7296	21.6581	24.7525	22.1876	24.1075	24.0365	23.6937	24.1391	20.5426	24.4554	22.4211	22.1671	23.6811	24.9585	24.5403	23.3035	24.5613	24.7469	23.433	24.4534	25.849	23.7833	24.1833	24.0187	24.3143	24.0177	25.0089	23.1561	24.1092	24.1594	23.958				13	13	9	30.5	30.5	20.8	77.011	0	129.22	784320000	147
NaN	21.5516	21.1172	24.4154	22.8836	24.3512	24.5176	21.2932	26.4943	26.1714	27.2578	24.997	25.8517	27.2689	25.5746	25.1352	26.4044	22.1777	23.0541	21.401	26.6818	24.816	22.3636	NaN	24.7878	NaN	27.3535	22.8108	21.3856	26.8104	25.9158	19.9749	27.7612	24.7266	23.3974	NaN				7	7	7	10.5	10.5	10.5	144.91	0	209.97	1948000000	107
25.4547	25.0667	24.407	24.2578	24.8833	19.4111	NaN	24.1002	NaN	24.7574	23.8327	25.5389	23.8888	NaN	23.9974	NaN	21.7953	24.8002	24.0475	23.9914	NaN	25.6687	25.9661	24.1519	24.0914	24.7198	NaN	24.7572	25.299	24.2957	25.0701	25.2764	24.4859	25.7528	NaN	NaN				4	4	4	12.3	12.3	12.3	54.577	0	323.31	894450000	39
24.7564	23.4873	24.0755	24.4651	25.1505	24.7054	24.0579	24.2207	24.5457	24.2232	24.5797	24.4088	24.5806	23.81	24.349	24.3035	24.7644	24.0936	24.3536	24.9203	25.3329	24.4839	24.6648	23.0646	24.4319	24.4767	23.5677	24.5216	25.0607	24.3209	24.0996	24.7376	23.8923	24.3683	24.6891	24.5063				8	8	8	41.7	41.7	41.7	40.786	0	183.15	1104000000	167
24.5761	25.2856	25.3101	25.1346	25.8227	NaN	24.1202	25.1041	22.3531	25.3819	24.8217	25.8075	24.4969	22.0892	26.0721	24.8048	23.3265	25.2366	25.5919	25.8016	24.9757	26.2319	25.6549	25.0035	25.936	26.3247	24.4039	25.5697	25.4013	25.4569	25.3451	26.0095	24.7606	26.1912	23.7424	22.5029				11	11	11	30.8	30.8	30.8	61.189	0	241.9	1550000000	164
23.6	23.1826	21.5267	22.0468	NaN	NaN	NaN	23.8357	NaN	24.2134	21.508	23.5938	NaN	NaN	23.7186	21.9138	NaN	NaN	NaN	23.8541	NaN	23.6631	23.1222	23.0641	23.455	NaN	23.3604	22.7907	22.9658	23.8009	23.1794	23.2189	23.0476	24.6996	NaN	NaN				5	4	4	18.5	16.8	16.8	54.513	0	245.87	274450000	53
21.6634	23.8976	24.6997	22.4814	23.0048	NaN	NaN	NaN	NaN	23.9418	NaN	NaN	22.1823	NaN	23.9983	21.2003	22.2182	22.6262	24.9708	23.1308	23.3126	NaN	23.5274	22.8905	23.9466	23.9233	21.6298	24.4845	NaN	23.5235	22.9279	24.9942	22.5757	23.1621	NaN	22.2851				3	3	3	20.8	20.8	20.8	27.598	0	6.4486	342960000	40
30.3591	28.2926	28.8088	28.8855	29.4882	29.7657	27.9026	29.5739	30.1128	29.2236	29.8065	29.7674	29.4162	29.6659	29.273	29.1509	28.8868	29.4234	28.9897	30.0103	29.5239	29.2516	29.5655	29.6595	29.5607	28.4467	29.3851	29.0187	28.9961	29.6187	29.4053	29.1298	29.7525	29.6082	30.2918	30.0588				21	21	13	54.2	54.2	35.2	80.64	0	323.31	31100000000	869
30.6164	29.7897	28.182	29.1761	30.4843	28.9599	30.089	29.0949	29.3002	29.6291	29.4956	29.3757	25.3116	29.3182	28.0284	29.5214	27.3523	30.8891	29.7035	28.6672	27.81	30.113	30.23	29.4634	29.8873	31.0923	28.4214	29.6124	29.9943	28.8216	28.5011	29.5801	28.4626	30.6451	28.2407	30.5779				3	3	3	29.1	29.1	29.1	12.074	0	323.31	36849000000	525
30.2424	29.3875	31.1287	29.984	30.2201	31.2233	30.7754	30.7971	30.4224	30.3192	30.9434	30.3726	31.1644	30.9915	31.2344	30.3247	30.748	30.3595	29.6385	31.2745	30.5787	30.7987	30.0295	30.1519	29.8512	29.8583	31.1142	30.9881	29.7537	31.4062	31.1321	29.8313	30.781	30.4417	30.4772	30.0755				26	26	26	73.9	73.9	73.9	56.559	0	323.31	76011000000	1998
NaN	NaN	21.5755	NaN	NaN	23.0006	NaN	21.9772	23.3865	21.2563	NaN	22.2922	23.0616	23.0633	NaN	NaN	NaN	NaN	NaN	NaN	NaN	NaN	NaN	NaN	NaN	NaN	22.8472	21.2265	21.9959	23.0009	NaN	20.3368	22.9184	NaN	22.2107	NaN				7	7	7	19.9	19.9	19.9	60.317	0	7.9348	102360000	25
29.5898	28.2416	27.5691	29.64	28.6858	29.7568	31.0741	29.4194	31.762	28.8736	30.9853	30.8995	29.0057	29.5017	28.0321	29.4165	30.2294	29.9973	26.9116	28.5559	29.7971	28.0505	28.8445	28.469	29.7462	25.0941	29.7886	27.6656	30.01	26.0859	28.6763	28.6773	29.9822	29.0747	28.9726	32.373				5	5	5	43.9	43.9	43.9	13.242	0	323.31	41205000000	1038
28.8332	25.6617	27.0362	26.3488	26.6772	27.2882	24.7835	27.5641	29.097	27.2889	28.1123	26.4835	27.0088	27.9376	27.211	27.3763	26.7327	26.0932	25.448	25.8986	28.447	27.1036	27.5446	27.2142	26.0521	26.9601	26.7273	27.1903	28.4529	26.2316	26.1309	26.2444	27.0399	28.2541	28.6489	28.2661				6	6	6	71.1	71.1	71.1	10.18	0	145.92	6341700000	117
24.1848	NaN	23.7578	24.1129	23.8359	24.1826	24.5569	NaN	25.0096	24.1757	24.9928	25.8333	24.6092	23.7527	24.0777	25.1987	24.8424	NaN	24.6593	25.191	22.5284	24.3083	24.2676	NaN	24.4918	23.8381	24.1393	24.374	25.2421	25.5692	24.2669	23.2135	27.8383	23.1201	23.6169	21.4672				6	6	6	17.7	17.7	17.7	45.398	0	114.81	1118600000	73
24.989	23.7794	NaN	24.0454	23.7748	NaN	24.3637	24.518	NaN	23.7104	23.2987	NaN	NaN	24.7089	NaN	22.8807	22.9418	24.9058	24.7828	24.3234	23.0238	24.0942	24.5621	24.9704	NaN	25.0399	NaN	23.5092	24.9567	22.6433	23.5099	24.259	NaN	25.3475	23.2026	NaN				3	3	3	36.9	36.9	36.9	25.097	0	31.219	586610000	31
NaN	NaN	28.3864	NaN	NaN	NaN	NaN	NaN	NaN	NaN	NaN	NaN	NaN	NaN	NaN	NaN	NaN	NaN	NaN	NaN	NaN	19.7448	NaN	NaN	NaN	NaN	NaN	NaN	NaN	NaN	NaN	NaN	NaN	20.3891	NaN	NaN				9	9	9	32.8	32.8	32.8	43.101	0	168.31	347270000	18
32.0286	31.4956	31.3951	32.1867	31.8639	31.792	31.5177	31.78	31.5234	32.0322	31.4909	32.3147	31.7954	31.2055	30.9984	30.8788	30.7935	31.7848	31.6832	31.6792	31.5139	31.5744	31.9451	31.3947	31.8225	31.7612	31.6356	31.5602	31.754	31.2336	31.4578	32.3115	31.2541	31.8715	31.8596	32.056				20	20	17	60.1	60.1	47.5	47.168	0	323.31	172020000000	5554
NaN	25.2074	NaN	NaN	23.9457	22.2768	NaN	NaN	22.4023	23.9334	NaN	NaN	NaN	NaN	NaN	NaN	NaN	NaN	22.4352	NaN	23.7235	24.3483	NaN	24.2315	NaN	22.21	NaN	23.7565	NaN	22.6717	23.8447	NaN	NaN	NaN	NaN	NaN				5	5	5	29	29	29	36.468	0	72.891	232580000	26
22.655	24.8097	22.3779	25.9702	23.6806	25.0608	26.1127	24.4291	26.2211	23.8843	24.6465	25.5241	26.5232	26.4455	22.8568	27.1249	25.706	21.8835	21.7486	23.899	24.9932	22.2886	21.7295	23.1809	24.581	21.5775	25.4761	22.2251	22.0309	24.7412	23.4324	23.7308	25.9915	22.8264	25.3117	26.5045				15	12	11	28.7	22.9	21.5	93.133	0	234.75	1539100000	128
27.8292	27.8019	27.4362	27.5558	27.7686	27.9128	27.6852	27.7978	28.2206	28.1613	27.8079	28.2391	27.7069	27.6285	27.5195	28.2433	28.0097	27.0251	27.2914	28.0668	27.0147	28.0533	28.3958	27.7655	27.5278	28.0783	28.0761	27.7475	27.9251	27.8042	28.0054	27.8004	27.4753	27.908	28.135	28.6408				12	12	8	32.8	32.8	22.4	63.146	0	323.31	10968000000	517
26.8297	27.1513	28.4168	26.8998	27.1688	28.0965	26.6319	26.6098	26.6115	27.0505	26.9849	27.0967	26.7876	26.2058	27.668	27.055	26.9629	26.52	26.9356	27.5968	26.8715	27.7021	27.1815	27.4658	26.5095	26.6675	27.7793	27.6747	26.7768	27.7233	27.5997	27.0534	27.0318	26.737	28.5801	27.1032				5	5	5	29.6	29.6	29.6	32.575	0	323.31	9196800000	442
31.1368	30.7129	30.8062	30.9126	31.4554	30.735	30.3311	30.8993	30.6588	30.527	30.2956	30.9593	30.6767	31.0849	30.6568	30.5008	30.1781	31.1148	31.192	30.6113	30.1009	31.3137	30.6985	31.089	31.0006	31.7085	30.3013	30.7774	31.0514	30.4353	30.5996	31.2437	30.1802	30.6966	30.2023	30.6209				12	12	8	35.1	35.1	25.8	28.87	0	323.31	75442000000	768
NaN	NaN	NaN	22.7001	22.5548	22.2744	NaN	NaN	25.3265	22.8859	23.0177	NaN	22.2153	23.4433	NaN	NaN	NaN	NaN	20.9321	NaN	NaN	NaN	NaN	NaN	NaN	NaN	24.8864	21.5747	NaN	23.238	23.0687	NaN	24.4031	NaN	22.7687	21.6064				9	9	9	14.9	14.9	14.9	111.13	0	31.238	184000000	23
24.4118	23.8104	NaN	25.3992	24.5951	24.9223	24.9498	24.4694	25.7698	24.5258	25.1354	24.6422	25.0933	25.3412	24.0044	24.4082	24.7125	24.5412	24.0157	24.1222	24.9345	24.2804	24.7856	24.2531	24.3602	23.8863	24.4983	24.2004	25.1174	24.0454	23.6763	24.2767	24.3013	24.774	24.227	24.3971				10	10	10	29.9	29.9	29.9	60.702	0	67.428	986770000	151
NaN	NaN	NaN	NaN	NaN	NaN	NaN	NaN	NaN	20.7331	NaN	23.1178	NaN	NaN	20.5771	NaN	22.8744	NaN	NaN	NaN	NaN	NaN	NaN	NaN	NaN	NaN	23.2055	20.296	NaN	21.805	23.4666	21.8932	23.7466	22.5459	22.6257	NaN				3	3	3	10.6	10.6	10.6	44	0	154.5	118540000	14
25.5397	23.7948	24.3121	25.6241	24.7297	25.4181	NaN	26.1342	25.2291	23.8798	26.2	24.9462	24.906	25.9136	25.0068	24.9277	25.0854	25.3242	23.4438	25.4865	24.8386	25.1522	23.289	23.4608	24.5721	23.6564	24.4121	24.5308	24.229	24.6802	25.1244	NaN	24.6746	24.4073	24.6823	24.3023				7	7	7	21.8	21.8	21.8	52.948	0	9.2813	1221300000	70
27.8644	26.9526	26.8661	27.3664	26.3264	26.9901	26.3671	23.6248	25.7018	26.6776	25.8764	25.7994	26.372	24.9833	25.6417	24.8394	25.7125	22.5919	27.2994	24.865	26.573	27.0593	27.3438	27.4521	25.2811	26.0017	25.9266	26.9863	27.7304	24.8746	25.2912	26.8638	25.4587	26.1304	28.4959	26.9131				4	4	4	67.8	67.8	67.8	10.044	0	19.39	4394300000	60
29.7584	29.1705	28.3567	29.3847	29.2455	28.8415	29.0399	29.4933	28.2531	29.6143	28.6839	29.636	29.0066	28.0471	29.5949	28.5247	28.3026	29.195	29.0883	29.1157	28.9663	29.5942	29.6687	29.2524	29.2835	29.7359	28.8298	29.4517	29.1439	29.1618	28.8205	29.7238	29.2224	29.6151	29.1384	29.3475				12	12	12	48.5	48.5	48.5	36.638	0	323.31	26925000000	648
29.7069	27.9079	27.4289	28.4405	27.1454	28.5753	29.2808	29.2371	28.4558	27.7538	27.9613	27.9683	28.4877	28.2724	27.5549	28.2004	26.7943	29.1198	28.3316	27.9667	27.4308	28.1591	28.5026	28.2853	27.614	28.1036	27.4241	27.8754	29.1908	27.454	27.2317	28.106	27.4684	27.9546	28.1358	28.0685				12	12	12	76.8	76.8	76.8	22.088	0	323.31	14373000000	413
28.058	26.502	27.1065	28.18	27.6089	28.9213	28.7488	28.827	29.4958	28.0439	28.9839	28.575	28.697	30.3602	28.2489	28.1604	29.0666	27.8831	26.8932	28.3069	28.7343	27.6982	27.929	27.3134	28.1343	27.0805	30.2388	27.9661	28.106	28.565	28.6611	27.6136	29.1957	27.967	28.9306	28.8868				14	14	14	35.2	35.2	35.2	57.116	0	323.31	17599000000	413
22.5656	23.173	21.7798	22.2382	22.8305	21.7901	21.9156	22.6847	21.4977	21.9789	21.8458	22.0587	21.9453	NaN	NaN	22.2389	NaN	22.3586	22.3348	21.6264	NaN	21.8992	22.64	22.8348	22.5607	23.5831	21.0927	22.3032	21.89	NaN	21.1141	22.601	21.3397	NaN	22.4919	22.1297				3	3	3	38.4	38.4	38.4	11.261	0	16.343	173010000	72
30.1074	28.2026	27.5622	29.1708	27.4667	29.6342	29.4909	29.8218	28.9627	28.2074	28.0402	28.2333	28.8545	28.2099	27.0815	27.8955	27.3137	29.2379	27.9851	28.6345	28.0256	27.7136	30.0329	28.6008	27.7442	27.9828	27.4786	28.196	30.3077	27.7357	27.1468	28.8131	27.4696	27.6439	28.4002	27.7916				15	15	15	55.3	55.3	55.3	44.552	0	323.31	22161000000	1033
29.518	28.5211	29.1581	29.4906	29.0712	29.3631	29.4274	29.5481	29.5223	29.422	29.9081	29.2349	29.0399	30.1489	29.691	29.6432	29.9723	28.7736	28.9286	29.726	29.4252	28.2694	29.1216	28.2446	29.1059	28.8332	30.2682	29.1001	29.2791	30.1702	30.0041	28.9787	30.0559	29.0797	29.5761	28.875				17	17	17	56.9	56.9	56.9	38.604	0	323.31	33517000000	880
NaN	22.4099	23.4296	21.4714	NaN	NaN	NaN	NaN	23.0326	20.8675	21.7336	20.7851	NaN	22.0019	NaN	21.4972	21.2538	NaN	NaN	21.3768	NaN	21.7693	NaN	NaN	NaN	NaN	22.1754	20.8039	NaN	NaN	NaN	NaN	22.6848	NaN	23.6089	NaN				4	4	4	9.9	9.9	9.9	65.163	0	17.777	79607000	15
NaN	NaN	20.9303	NaN	NaN	23.1616	23.0136	NaN	24.3902	22.7358	24.7883	22.4855	NaN	24.6431	22.8152	23.3286	NaN	NaN	NaN	22.0416	22.4653	NaN	NaN	NaN	23.1826	NaN	24.2705	22.1829	NaN	24.4803	NaN	NaN	25.757	20.3298	24.1654	22.0317				7	7	7	23.2	23.2	23.2	67.046	0	23.475	292610000	60
22.825	23.2417	24.0628	25.7409	25.5202	24.544	24.0811	24.0218	26.7846	24.6302	25.0975	23.9235	24.1117	26.4833	24.0638	23.2441	25.9224	24.3958	NaN	21.4637	25.9996	24.1482	NaN	NaN	23.7882	NaN	25.3245	24.2725	23.7079	25.071	24.8275	23.4942	27.1808	25.152	25.2172	25.0166				5	5	5	39.6	39.6	39.6	22.277	0	92.043	1369700000	71
27.4591	27.507	27.9688	27.3599	27.4727	27.5587	27.4017	28.0216	27.3444	27.6511	27.4044	27.7014	27.7829	27.1278	27.7178	27.4092	27.4709	27.8141	27.7981	27.8007	27.4241	27.9834	27.8131	27.7599	27.773	28.2878	27.3913	27.9164	27.8227	27.4257	27.5295	28.01	27.4367	27.7871	27.4876	27.9353				28	28	28	54.9	54.9	54.9	81.889	0	323.31	9289100000	745
31.8684	32.0746	32.4496	32.0406	32.111	31.9283	31.908	31.607	31.8546	32.2389	31.7826	32.0612	31.7871	31.7613	31.9714	31.6308	31.5254	31.9468	31.9899	32.2573	32.2102	32.0976	31.7547	32.1199	32.1452	32.2446	32.2326	31.9453	32.0033	32.0659	31.9678	32.22	31.9107	31.8658	32.5497	32.1224				19	19	4	64	64	13.5	49.67	0	323.31	246650000000	3865
NaN	NaN	27.5111	NaN	NaN	NaN	NaN	NaN	NaN	NaN	NaN	NaN	NaN	NaN	20.2262	NaN	22.2792	NaN	NaN	NaN	NaN	NaN	NaN	NaN	NaN	NaN	NaN	NaN	NaN	NaN	NaN	NaN	NaN	NaN	NaN	NaN				5	5	5	29.2	29.2	29.2	29.557	0	121.95	208940000	18
NaN	NaN	NaN	NaN	NaN	NaN	NaN	NaN	NaN	NaN	NaN	NaN	NaN	NaN	NaN	NaN	23.6117	NaN	NaN	NaN	NaN	NaN	NaN	NaN	NaN	NaN	NaN	NaN	NaN	NaN	NaN	NaN	NaN	NaN	NaN	NaN				2	2	2	6.2	6.2	6.2	68.478	0	19.727	27318000	2
21.3147	21.941	23.6953	24.2917	22.8748	24.6842	24.8845	NaN	28.3259	26.1266	28.4139	25.7778	26.0658	26.7054	26.5759	28.2626	27.2017	NaN	24.0435	21.5353	25.8843	24.4178	23.9152	NaN	26.399	23.2947	26.2769	24.9922	24.9155	28.494	26.5953	21.1005	28.5437	26.4477	25.4079	23.1014				8	8	8	27.6	27.6	27.6	39.746	0	278	3659000000	137
31.7666	28.358	28.6341	30.5506	29.7055	30.4711	29.9272	30.8346	30.323	29.0224	29.5332	29.6177	28.9018	28.8808	28.738	29.0799	27.9686	30.0028	28.9985	29.4638	29.7802	28.838	30.7045	30.3446	28.4235	28.0981	27.9844	28.816	31.9256	28.1044	27.8537	29.393	28.2155	29.5029	28.9549	29.1368				9	9	9	24	24	24	58.112	0	323.31	34919000000	293
26.151	22.8751	22.8739	24.9359	NaN	25.1982	24.9061	24.1341	26.2135	24.1508	24.6741	24.0452	24.2819	24.7322	22.4022	24.4397	23.3416	NaN	21.5966	23.8486	24.754	23.3643	24.7837	23.8531	24.0176	NaN	25.0259	24.1132	24.9339	23.5318	23.4376	23.7321	24.2695	23.3606	24.7004	25.0662				9	9	9	27.2	27.2	27.2	63.111	0	30.932	793950000	123
23.4261	NaN	NaN	22.0057	21.3719	23.2616	22.8475	24.0917	24.351	22.2501	23.2617	22.339	24.4463	23.2179	21.4511	20.1437	24.5608	22.7121	NaN	22.834	NaN	NaN	22.5746	22.8252	23.3386	NaN	22.3304	21.6054	24.92	NaN	20.5414	19.7354	21.8679	NaN	23.8494	25.6207				4	4	4	18.9	18.9	18.9	37.564	0	67.917	396450000	36
33.0866	32.4263	32.2441	32.5151	32.4171	31.9813	32.1095	32.8242	31.7241	32.243	31.7363	32.1454	32.2148	31.3875	32.3352	31.4171	31.181	32.6295	32.5451	31.9843	31.7172	32.777	32.3413	32.7103	32.2234	32.0202	31.3373	32.4396	32.7822	31.3186	31.5557	32.4068	31.5355	32.3584	31.8442	31.1574				13	13	9	87.9	87.9	70	15.054	0	323.31	258270000000	4203
NaN	22.2006	22.237	NaN	NaN	23.6792	NaN	NaN	NaN	NaN	22.9114	NaN	22.7202	25.3813	22.7397	NaN	23.6508	NaN	22.449	NaN	23.1059	NaN	NaN	23.105	NaN	NaN	NaN	23.6082	NaN	NaN	NaN	23.0433	21.4612	22.2731	23.6035	NaN				4	4	4	37.1	37.1	37.1	30.005	0	17.888	181720000	18
30.2956	30.182	29.5876	29.9614	30.4695	29.2655	29.8052	29.9791	28.9832	29.673	29.5212	29.7905	29.4134	28.4586	29.1587	29.5096	29.3354	30.2878	30.5727	29.021	29.5824	30.4291	29.9506	30.4176	29.8564	30.7966	28.3586	29.8987	30.2175	29.0458	28.662	30.3001	29.1721	29.8995	29.2485	29.483				11	11	11	78.3	78.3	78.3	19.608	0	323.31	41225000000	743
23.4345	NaN	22.9671	22.4868	NaN	NaN	NaN	23.0085	NaN	23.9726	NaN	24.0402	NaN	NaN	23.5769	22.7145	NaN	NaN	23.3301	23.5607	NaN	NaN	23.7425	22.7284	23.4848	23.9339	22.1173	22.9302	23.8055	23.1794	23.4325	24.0011	22.9662	23.9226	NaN	NaN				3	3	3	21.7	21.7	21.7	23.147	0	60.309	281230000	37
24.5724	23.54	25.0442	24.3761	23.7554	23.9163	23.9307	24.7986	23.6964	24.9302	24.4514	24.6779	25.005	23.6182	25.3738	23.3016	24.6087	24.2333	24.5654	25.2529	25.1191	24.3025	24.4221	23.9869	24.0346	24.9671	25.6767	24.2264	23.4784	23.8006	24.7361	24.6959	24.941	24.6014	25.0004	24.444				17	17	17	18.5	18.5	18.5	170.59	0	47.173	1015300000	155
31.3601	28.2742	26.5169	30.3306	30.0723	27.2468	30.2674	30.328	29.9279	28.3763	29.6345	28.0869	29.0185	30.2731	27.6103	29.0203	29.052	29.3403	26.8376	28.9216	28.9672	29.1881	29.4031	29.3232	28.9511	26.4908	28.2996	28.2653	30.768	27.9092	27.8772	29.0133	28.5109	28.3702	29.9519	29.334				8	8	8	31.3	31.3	31.3	37.821	0	323.31	25446000000	282
29.5461	28.9718	28.4355	29.1152	29.1701	28.8485	29.2892	29.6597	28.7399	29.4141	28.975	29.3716	29.7072	29.3749	29.5464	28.3295	28.1955	29.3731	28.9562	29.1274	28.4621	29.0271	29.5605	28.588	29.0762	29.1035	29.1007	29.2141	29.417	29.146	29.5152	29.4569	28.9703	29.3137	29.1441	29.9788				26	19	19	48.4	32.9	32.9	84.659	0	323.31	27094000000	845
NaN	NaN	23.0182	NaN	NaN	21.7825	NaN	NaN	23.1147	23.5745	23.3931	22.7007	23.8073	23.1724	24.4695	NaN	21.8922	NaN	NaN	23.7493	NaN	23.0888	NaN	23.8463	23.9573	23.3541	NaN	23.8216	22.9719	22.8992	NaN	23.7036	22.6162	23.4979	NaN	NaN				3	3	3	13.2	13.2	13.2	43.363	0	90.713	242770000	22
26.5714	26.3998	25.7854	25.4241	25.4667	25.3724	25.6368	26.3377	25.2078	24.8987	25.3964	24.748	24.899	23.6702	23.9151	26.0705	26.9012	25.7152	25.7155	25.0053	25.881	25.8327	25.2304	25.4908	21.7587	24.9511	23.9834	25.0143	22.7492	24.6489	24.2584	25.3296	24.7524	25.0044	25.0299	24.2064				2	2	2	48.4	48.4	48.4	10.739	0	204.76	2252000000	79
22.1159	20.7689	21.2245	23.2565	NaN	23.7906	24.6636	NaN	25.0697	24.1349	24.9404	23.9443	25.6626	25.9825	25.9799	23.3972	24.8829	NaN	21.1818	24.2356	24.52	21.4305	NaN	NaN	23.6585	NaN	26.7398	23.4929	NaN	25.973	25.9057	NaN	24.7024	23.4096	21.0758	22.1288				17	17	17	17.6	17.6	17.6	198.04	0	323.31	980360000	112
22.887	23.6199	24.836	22.376	24.0349	24.6134	24.542	25.4828	23.5899	24.3505	22.2097	23.1012	26.3834	23.9557	25.3693	22.96	23.2175	24.3495	24.7721	25.2675	24.1231	23.542	23.2918	23.4718	22.7523	24.2895	23.8216	24.4514	24.2077	23.8673	23.8091	24.6523	23.7255	22.4125	23.414	22.8229				13	13	11	39.1	39.1	36	56.033	0	193.98	784030000	136
NaN	NaN	NaN	NaN	NaN	21.7334	NaN	NaN	23.0378	NaN	22.452	NaN	NaN	NaN	NaN	26.4927	24.7579	21.7905	NaN	21.1391	22.5154	NaN	NaN	NaN	22.3652	22.5051	23.9723	NaN	NaN	22.2045	21.69	NaN	22.9413	NaN	NaN	NaN				8	3	3	23.8	13.3	13.3	28.684	0	262.82	272190000	12
24.2918	23.4761	25.0207	24.4154	23.8241	25.4023	25.2008	24.4238	24.057	24.8538	25.1976	24.7318	24.8634	25.3774	25.3463	24.4748	24.4149	24.265	24.5407	25.3997	25.2307	24.7459	24.9671	24.3653	24.6688	24.5445	25.7878	25.0297	24.3242	25.0284	25.6064	24.3468	25.0487	24.8175	25.8579	24.2561				8	8	8	31.9	31.9	31.9	50.212	0	323.31	1261300000	130
24.3095	23.8826	NaN	23.1285	24.1029	NaN	22.2792	NaN	NaN	22.7748	22.2789	23.3584	22.379	22.4378	22.4092	NaN	NaN	23.3999	22.8625	NaN	23.0837	23.4987	22.6858	22.3363	23.7643	NaN	21.8647	22.6684	NaN	22.8022	21.9008	23.9965	NaN	23.5513	NaN	NaN				2	2	2	5.8	5.8	5.8	75.823	0	84.628	236110000	40
25.1761	24.5508	NaN	27.8961	27.5092	29.2438	27.3413	NaN	30.8227	30.0129	31.9169	28.7712	29.8606	32.2716	29.1924	30.0816	31.0885	26.3999	26.128	NaN	29.9836	28.2833	NaN	24.0373	28.5882	NaN	31.2366	27.8063	27.7383	31.5311	30.5792	NaN	31.7173	28.2932	29.1442	25.2518				10	10	10	13.5	13.5	13.5	129.31	0	323.31	41919000000	160
30.3737	30.621	30.8714	30.3485	30.929	29.6236	29.5133	30.2377	29.4214	30.5705	29.7822	30.3343	29.8075	29.5572	30.825	30.443	30.1266	30.1877	30.8929	29.9354	30.0914	30.7873	30.3914	30.1971	30.4531	31.4831	30.2273	30.727	30.4978	30.1877	30.6479	30.9232	30.1601	30.3613	29.6392	30.122				30	30	30	53.3	53.3	53.3	75.872	0	323.31	61706000000	1403
NaN	NaN	NaN	NaN	NaN	NaN	22.304	22.7065	23.0348	22.0849	23.0287	NaN	NaN	23.4133	NaN	NaN	22.3994	NaN	NaN	22.1895	NaN	NaN	NaN	NaN	NaN	NaN	22.9263	22.7768	NaN	22.3531	22.8185	NaN	22.8233	NaN	NaN	NaN				7	2	2	55.4	18.7	18.7	22.006	0	35.339	98592000	10
NaN	NaN	NaN	NaN	NaN	22.2698	21.654	NaN	22.4006	22.4083	21.2419	NaN	21.1255	21.9151	22.0924	24.5521	21.8235	NaN	NaN	NaN	23.7281	23.2727	21.9417	NaN	20.4614	21.3422	NaN	NaN	NaN	22.8327	21.9844	20.9149	22.3388	22.9889	NaN	NaN				2	2	2	6.9	6.9	6.9	35.766	0	323.31	162300000	18
21.9918	NaN	NaN	22.9073	NaN	NaN	NaN	NaN	23.2337	NaN	21.0204	NaN	NaN	22.1498	21.4331	23.5085	NaN	NaN	NaN	NaN	22.6231	NaN	22.0027	NaN	NaN	NaN	22.5298	NaN	NaN	21.6163	22.1177	NaN	NaN	NaN	23.4228	NaN				4	4	4	12.8	12.8	12.8	45.14	0	65.149	97752000	18
25.5386	26.5445	25.1687	26.0374	26.2825	26.0336	25.8658	25.4381	26.2866	25.6473	25.6933	25.6702	25.9486	26.0885	24.6082	26.107	25.9675	26.0126	25.3107	25.5443	25.2964	25.7285	25.665	25.3303	25.5128	26.0945	25.38	24.7675	26.0583	25.131	25.1086	25.4421	25.2967	25.7755	25.6306	27.2339				12	12	12	34.3	34.3	34.3	61.815	0	107.18	2241900000	192
23.4997	21.8727	22.848	23.7326	23.2641	22.0798	23.1713	22.0863	23.868	22.6057	23.4127	23.0999	23.5373	23.3434	23.3974	22.0221	23.2877	NaN	22.8067	22.5419	23.0681	22.3342	22.7529	23.2846	23.8055	20.6068	23.1264	23.6194	22.662	23.4606	22.8189	23.3541	23.6008	23.3789	23.2696	22.4904				6	6	6	14.1	14.1	14.1	74.731	0	31.873	349320000	87
21.6374	24.381	24.8179	21.913	22.5733	20.5151	NaN	NaN	NaN	22.73	NaN	22.4584	NaN	23.4998	22.4083	23.4251	NaN	NaN	NaN	21.6572	22.6526	22.6574	23.2214	NaN	23.0103	23.0097	21.9836	22.4479	NaN	22.7689	22.7479	22.8869	22.4038	22.326	NaN	23.7632				7	6	6	13.5	12.3	12.3	81.775	0	174.96	235490000	50
31.3394	30.1283	30.3607	31.3303	31.426	30.9613	31.3575	31.3768	30.4503	31.2097	31.0675	31.4168	31.5293	30.8958	31.1781	30.1957	29.726	31.4074	31.1652	30.9589	30.9058	30.8799	31.8546	30.8919	31.2465	31.386	31.2451	31.0048	31.2792	30.9277	31.1177	31.6577	31.0418	31.4201	31.2374	32.2668				26	24	16	49.2	47.2	30.2	83.263	0	323.31	102050000000	1693
NaN	NaN	22.5403	22.0074	22.9797	23.3741	23.2264	22.247	NaN	22.5894	22.2819	22.9183	22.5171	23.3979	23.8428	22.3536	22.6801	NaN	22.3054	23.6708	23.4048	22.6435	NaN	NaN	22.6819	22.0252	24.5047	22.463	NaN	23.0863	23.8578	20.889	23.0508	23.0886	24.2277	22.2965				7	7	7	16.1	16.1	16.1	69.81	0	126.48	272730000	65
NaN	21.8461	20.7825	22.1403	21.0925	21.8647	21.3011	20.5241	19.8783	21.1769	21.0146	21.5527	20.7976	NaN	20.7449	22.2822	22.4918	NaN	20.7518	21.4539	20.7397	21.2614	21.8349	21.018	21.3627	21.3158	21.3701	20.5993	NaN	21.2491	20.887	20.6421	21.3522	21.8767	23.6224	23.4983				4	4	4	12.1	12.1	12.1	64.369	0	27.059	107030000	62
23.4876	21.988	22.2379	23.3978	22.5495	23.0734	22.3907	NaN	27.809	24.1742	25.4561	25.7521	21.9653	22.4129	23.7879	24.0675	23.9293	22.562	22.6032	NaN	24.9982	23.8361	23.2847	NaN	24.7001	24.0851	24.7117	22.8451	NaN	21.3525	23.9823	24.1658	25.3277	25.7177	22.7077	28.7404				5	5	5	43.1	43.1	43.1	28.518	0	108.59	1133800000	80
NaN	NaN	NaN	NaN	NaN	NaN	NaN	NaN	23.218	22.8598	23.4644	23.358	NaN	NaN	NaN	23.2133	24.8324	NaN	20.3881	NaN	24.1547	20.9595	NaN	NaN	21.8771	NaN	25.1366	NaN	NaN	23.5925	24.0906	NaN	24.7822	NaN	NaN	NaN				3	3	3	8.6	8.6	8.6	65.764	0	63.184	281010000	31
26.3965	25.8738	25.6678	27.32	26.3932	26.9318	26.8957	25.8833	27.1481	26.2282	26.5589	25.6375	25.3706	25.8292	25.2606	28.3609	26.7517	27.9829	26.715	24.3065	27.8558	26.644	25.9269	24.9814	25.6623	26.001	24.9393	25.9352	25.9139	26.9726	26.6041	24.5695	26.2277	26.6846	24.0392	22.653				4	4	4	21.2	21.2	21.2	25.851	0	157.43	4303600000	121
25.6801	28.7872	30.2495	29.4606	28.9959	28.8109	27.9079	24.1135	30.3088	27.251	29.1667	29.6952	26.1798	28.9516	26.8867	27.2581	29.1853	27.8618	28.4807	21.6683	28.3631	28.5256	25.6354	26.0056	29.4662	25.2356	27.8385	30.0012	25.4707	27.3566	28.0991	28.1204	28.7653	28.8508	26.1615	32.1041				7	7	7	35.3	35.3	35.3	28.837	0	323.31	21023000000	479
20.7156	NaN	20.758	19.1447	20.4689	NaN	NaN	19.7641	21.5008	20.1336	20.2993	19.8829	20.1314	20.3104	NaN	20.1852	23.1266	20.1995	NaN	20.2728	23.1084	20.679	20.5164	20.1784	20.2188	20.8579	NaN	20.8531	18.7547	NaN	19.7065	NaN	20.1104	20.4809	20.8603	20.1858				2	2	2	11.9	11.9	11.9	37.699	0	47.404	76426000	37
NaN	NaN	NaN	NaN	NaN	NaN	NaN	NaN	22.9331	NaN	NaN	NaN	NaN	23.7311	NaN	NaN	22.9709	NaN	NaN	NaN	21.0133	NaN	NaN	NaN	NaN	NaN	22.5816	NaN	NaN	NaN	NaN	NaN	NaN	NaN	21.9392	NaN				5	5	5	9.1	9.1	9.1	85.513	0	11.996	38968000	18
NaN	NaN	NaN	NaN	NaN	22.6453	NaN	NaN	NaN	NaN	NaN	NaN	NaN	NaN	NaN	NaN	22.7592	NaN	NaN	NaN	NaN	NaN	NaN	NaN	NaN	NaN	NaN	21.4208	NaN	NaN	NaN	NaN	NaN	NaN	21.9386	20.4695				3	3	3	3.3	3.3	3.3	113.38	0	7.3157	25433000	10
24.9648	25.2485	26.7993	25.6334	24.1993	23.4447	26.0528	25.5134	24.9763	25.5727	25.5015	25.4725	25.6431	24.7911	26.544	24.7732	25.2576	25.2864	25.5388	26.5008	25.6108	25.5057	25.1167	25.4795	24.2808	24.0664	25.7818	26.3567	24.5714	26.2326	26.1527	24.8188	25.5984	25.3365	25.1939	NaN				11	11	11	44.1	44.1	44.1	43.295	0	58.869	1932600000	133
26.8441	26.1586	26.6012	25.4289	24.4113	26.1368	26.5604	26.6843	26.1665	25.9729	26.531	24.5282	26.7793	25.7114	26.3412	26.6267	24.5986	25.9245	25.8147	27.4503	25.5996	25.8376	25.8275	26.5119	26.038	26.0615	25.6593	25.9858	26.7086	26.229	24.7644	25.5528	25.7305	26.0683	27.0538	26.2303				7	7	7	35.7	35.7	35.7	40.124	0	168.15	3046000000	187
27.4615	26.3257	26.3625	27.2398	26.8131	28.9273	27.7041	28.3805	28.4878	25.9966	27.2865	26.3322	28.7637	27.7243	24.8456	27.5009	27.8875	28.7012	25.9005	26.9562	27.5242	26.3256	26.702	26.5842	26.1823	26.0287	26.3571	26.1841	28.4502	26.1773	25.9531	26.4948	26.6323	26.2214	27.7135	27.478				9	9	9	29.9	29.9	29.9	40.076	0	323.31	7442300000	234
20.7018	22.0559	23.3665	23.249	NaN	24.9809	22.9082	20.9129	23.9001	23.3392	24.6332	22.5623	24.5187	26.1802	26.0388	NaN	23.1211	21.5604	21.5448	24.3736	22.7681	22.3162	NaN	NaN	22.5727	NaN	24.9832	23.6259	20.7536	25.7163	25.0815	NaN	24.1741	22.5985	NaN	NaN				6	6	6	6.1	6.1	6.1	167.55	0	76.058	574180000	73
24.3708	NaN	25.3601	NaN	NaN	NaN	25.2343	24.6911	24.3123	24.9874	24.8825	NaN	NaN	25.3461	26.066	25.3222	NaN	NaN	NaN	24.9977	NaN	25.446	NaN	NaN	24.5062	23.99	25.1543	26.0757	25.1738	25.204	25.2173	NaN	NaN	25.7923	25.3351	24.6339				2	2	2	11.1	11.1	11.1	35.422	0	5.8375	850670000	18
29.1105	28.7164	29.0407	28.4898	28.7203	27.4189	27.5983	29.1698	27.4741	29.0285	27.8495	28.7254	28.3541	27.6055	28.81	27.8171	27.2102	28.8347	29.1443	29.0144	27.8031	28.7464	28.9573	28.4215	28.8078	29.4334	28.0422	28.7565	28.9745	28.6218	28.9074	29.259	28.1798	29.0719	27.5813	27.8555				26	26	26	32.2	32.2	32.2	131.13	0	323.31	16830000000	860
23.5425	23.1757	22.8875	23.5858	23.1015	22.4915	22.7745	23.0917	22.4726	22.4922	21.9447	23.393	22.0931	22.2116	22.2228	23.0522	23.7544	22.534	23.0226	23.2485	25.7091	22.9852	24.0279	23.1694	21.8748	23.3752	22.2765	22.6677	23.4399	21.954	22.8052	23.1679	NaN	23.0722	23.4817	23.5399				3	2	2	20	16.4	16.4	25.486	0	80.979	397970000	47
22.3764	NaN	24.8103	26.1251	NaN	24.483	24.1426	24.144	26.4343	26.4177	26.015	23.4461	24.8422	26.3684	25.7231	25.7984	25.6461	22.7931	21.5013	24.2123	26.3072	NaN	23.4081	NaN	25.6681	22.7358	27.4869	25.7475	20.0978	26.6195	26.834	NaN	26.9464	24.5429	26.8636	24.4571				13	13	13	15.8	15.8	15.8	139.09	0	246.99	2013000000	123
25.4639	24.8185	26.1414	24.6749	25.9709	25.0626	25.0334	25.2895	25.0778	25.5617	25.2378	25.763	24.8218	24.9088	25.8906	24.5098	24.4412	24.8182	25.2896	25.3032	24.9893	25.9977	25.6203	26.138	25.2656	25.6005	25.2457	25.9317	25.5029	25.5114	24.8557	25.8861	25.2505	26.1139	23.777	24.9612				3	3	3	14.5	14.5	14.5	50.617	0.0002613	4.0867	1746100000	61
NaN	21.8312	21.8977	23.7695	NaN	23.2618	23.2228	23.3657	23.2193	22.2158	22.8544	22.8464	24.7223	23.5092	22.6399	NaN	21.9654	23.3944	22.4044	23.5478	22.9703	22.0776	NaN	22.2617	22.4386	NaN	22.7384	21.8119	22.5716	21.8313	22.9876	22.041	22.0944	NaN	NaN	NaN				8	6	6	23	20	20	57.241	0	132.66	244690000	53
24.0539	21.8537	21.855	23.6292	23.2359	22.2133	23.6433	22.4279	24.8762	21.955	23.4361	NaN	22.692	23.863	21.188	20.6053	NaN	23.999	NaN	21.9771	22.9706	NaN	23.0279	21.9515	22.7893	NaN	22.6643	21.7151	23.9079	22.7756	22.499	NaN	NaN	22.5703	24.0848	23.5755				5	5	5	7.2	7.2	7.2	114.54	0	323.31	260810000	39
NaN	NaN	20.8092	19.8445	19.7547	NaN	NaN	NaN	20.5763	NaN	21.2195	20.4168	21.2101	21.0094	20.6628	21.4826	22.1244	NaN	NaN	20.7638	21.9607	NaN	NaN	NaN	20.5968	NaN	20.507	20.8067	NaN	20.9734	20.759	20.6285	21.5858	20.9037	NaN	NaN				2	2	2	11.8	11.8	11.8	45.412	0.00027078	4.8314	64831000	29
31.6424	32.2779	33.4136	33.0167	32.2653	33.7012	33.1426	32.4014	32.8484	32.6365	32.9508	32.7026	32.4861	33.6798	33.534	33.4067	33.561	32.4975	32.4782	33.5026	33.1302	32.0495	32.1777	32.717	32.8648	31.6327	33.1481	33.3711	32.072	33.4394	33.4724	32.2424	32.886	32.3669	33.2209	32.3227				35	35	33	69.5	69.5	65.7	53.651	0	323.31	413640000000	4675
21.8484	NaN	NaN	24.7983	23.4011	23.8699	25.0858	NaN	25.6805	22.5132	23.6825	23.3385	NaN	23.8037	NaN	25.0611	23.521	NaN	NaN	NaN	NaN	23.6414	NaN	NaN	23.0522	NaN	23.235	21.1648	22.9938	23.0397	23.7337	NaN	24.4628	NaN	27.5497	23.8569				9	9	9	35.4	35.4	35.4	54.565	0	69.128	583700000	35
27.2628	27.4543	27.1593	27.4108	27.241	27.1025	26.9922	27.1328	26.9218	27.2188	26.7551	26.754	27.0081	26.2384	26.1444	27.3531	27.8855	27.101	27.3212	26.8407	26.8024	27.1976	27.1601	27.8933	26.938	27.2151	26.9706	27.3083	26.8559	26.7972	26.3284	27.2783	26.9336	26.4898	27.7241	27.487				4	4	4	41.5	41.5	41.5	15.55	0	303.46	6874300000	282
25.5264	24.8216	25.5742	25.139	25.0964	25.3761	24.6783	25.8957	25.2535	25.2529	25.093	25.2279	25.5695	25.5804	25.7391	24.3066	24.871	25.4767	25.8077	25.726	25.0225	26.0252	24.9898	25.6661	25.5055	26.1726	25.1506	25.4979	25.2449	25.0947	25.3819	25.8102	24.888	25.3354	25.7792	22.1959				8	5	5	39.8	29.1	29.1	40.532	0	212.9	1690400000	112
31.191	30.5354	29.8128	30.377	30.3857	31.3265	30.7469	31.4293	31.0399	30.2823	30.5626	30.2266	31.0254	30.9732	29.919	30.4526	31.3087	31.2514	30.4196	30.0765	30.1699	30.6831	30.8784	30.6537	30.4291	30.7003	30.4147	30.5258	31.4665	29.7856	30.5318	30.6688	30.327	30.5044	31.2332	30.8646				22	22	22	67.5	67.5	67.5	35.936	0	323.31	83400000000	1330
30.3926	30.3068	30.2857	30.9096	30.3817	29.8475	30.1877	30.1831	30.1097	29.8949	29.7714	29.9389	30.5082	29.8522	30.0624	29.6486	30.0812	30.5648	30.7211	29.9679	30.0885	30.5372	30.3145	30.7982	29.9524	30.3058	29.5775	30.4282	30.3356	29.5437	29.6827	30.5044	29.81	30.1819	30.291	30.4718				14	14	14	58.3	58.3	58.3	32.854	0	323.31	56295000000	994
25.3021	23.9602	26.1114	25.1696	24.7903	24.693	23.8391	24.2845	22.9137	24.7608	24.512	24.5286	24.4531	24.2419	24.7743	23.3092	23.8841	23.8809	24.5052	24.9543	24.8153	25.0709	24.4205	25.6478	24.9009	24.9972	24.4357	24.8753	25.4191	24.2455	24.357	25.0953	24.5939	24.6644	26.1781	25.4648				6	6	5	31.2	31.2	28.4	31.279	0	38.059	1156200000	94
25.0756	25.5736	24.7196	24.8293	24.832	25.1725	23.427	24.9823	24.6878	25.4781	25.4033	25.6573	24.5476	NaN	22.6936	24.8232	23.943	24.5165	25.6027	24.0627	24.464	25.4395	26.1199	25.5218	25.1739	26.5036	24.672	25.7973	24.8999	24.8698	25.0093	26.0796	25.1626	25.1102	25.974	26.3894				13	10	10	54.4	41.7	41.7	47.268	0	323.31	1538200000	158
23.7447	24.4608	25.3945	24.0571	23.7796	25.0802	24.8668	25.4404	24.0993	24.0345	24.5522	23.9052	25.38	24.9293	24.1831	25.1725	24.822	24.5469	23.3901	25.8715	24.5415	23.8418	23.5002	24.976	23.3709	23.3072	24.6465	24.4345	23.3188	24.641	23.2912	23.5322	24.506	24.248	24.2497	22.9711				11	11	11	42.5	42.5	42.5	44.292	0	323.31	1008000000	135
22.0532	NaN	NaN	21.5679	NaN	21.8755	NaN	NaN	NaN	NaN	NaN	NaN	NaN	22.2396	22.34	NaN	NaN	NaN	NaN	NaN	NaN	NaN	22.069	NaN	NaN	NaN	21.8824	NaN	NaN	NaN	NaN	NaN	NaN	NaN	NaN	NaN				3	3	3	35.4	35.4	35.4	16.156	0	9.162	34222000	9
28.8759	28.5492	28.0281	28.6553	28.0317	28.5831	28.5039	28.3711	28.0802	28.3964	28.263	28.3577	28.2092	28.1581	28.4781	28.0317	28.7266	28.5176	28.515	28.2985	28.8769	28.1056	28.7174	28.4153	28.2315	27.9686	28.6169	28.3707	28.4971	28.0757	28.2549	28.4365	28.4319	28.0647	29.1315	27.871				9	9	9	52.9	52.9	52.9	23.356	0	323.31	20334000000	876
25.2108	25.3831	25.1712	24.9259	NaN	NaN	24.3378	NaN	23.0957	24.301	21.9824	NaN	25.0648	24.0176	24.9859	23.8334	23.2423	NaN	24.8017	24.6048	NaN	25.433	NaN	25.3078	24.9182	25.773	23.3456	25.2769	25.2361	24.2106	24.4591	25.0488	NaN	24.2934	NaN	23.3949				2	2	2	13.6	13.6	13.6	19.429	0.00026281	4.1977	777860000	28
30.7826	28.8892	28.6463	30.6527	29.8592	30.391	29.7377	28.0929	31.6108	29.2362	30.4652	29.2242	29.211	30.5179	28.1658	29.4112	30.3994	29.869	28.7426	28.0681	30.2272	29.4345	29.8333	28.6283	28.8397	27.8846	29.2475	29.0222	30.1301	28.3103	28.5692	28.5898	29.3268	29.3018	30.8786	30.3321				8	8	8	69.6	69.6	69.6	14.716	0	323.31	38861000000	1067
23.9187	NaN	22.8709	23.5291	22.224	22.2362	24.1703	23.2785	23.6688	23.1033	NaN	22.9038	22.4829	23.2005	22.9478	23.0387	22.9285	24.4194	NaN	22.5489	23.1016	23.721	23.2743	23.8653	22.9857	23.374	22.9866	23.4336	23.266	22.704	NaN	23.702	23.1688	23.3531	23.8354	23.975				5	5	5	34	34	34	25.789	0	323.31	371580000	43
24.1479	24.2098	25.9108	22.4181	22.7242	23.7195	23.6673	22.761	23.4608	24.5834	23.9591	23.3885	23.6882	24.0593	25.6964	23.6197	23.1406	NaN	NaN	25.6594	22.3501	25.3288	22.9585	NaN	23.6726	23.7669	24.0604	25.7251	24.6778	24.597	24.9952	23.3174	23.366	23.7503	24.1492	NaN				4	4	4	25.1	25.1	25.1	24.893	0	175.75	869120000	46
23.2123	23.3956	22.9896	23.6826	22.5406	23.9169	NaN	23.2388	24.8098	22.2114	NaN	NaN	23.5626	25.0142	23.6768	20.85	22.9154	23.9793	25.0946	22.5853	23.2125	22.5963	NaN	23.1291	23.4854	NaN	21.8032	24.8387	22.2562	23.3137	NaN	NaN	NaN	21.5148	23.5557	22.878				4	4	4	26.8	26.8	26.8	17.523	0	8.8008	362600000	39
29.3633	26.8014	24.7268	27.7679	28.4339	28.8229	25.8971	27.718	28.3096	26.7255	27.5735	27.3846	26.4701	27.7037	25.1009	27.3415	27.1718	27.4199	26.577	28.0017	27.8461	26.5741	28.2939	28.1124	26.8663	26.2389	26.3498	26.9964	28.4249	26.209	25.9981	27.3838	26.6767	26.8788	29.7206	26.3452				11	11	11	49.1	49.1	49.1	36.842	0	323.31	7593000000	282
NaN	NaN	NaN	NaN	NaN	NaN	NaN	NaN	26.3924	NaN	NaN	NaN	NaN	NaN	NaN	NaN	NaN	NaN	NaN	NaN	NaN	NaN	NaN	NaN	NaN	NaN	25.7244	NaN	NaN	NaN	NaN	NaN	25.7369	NaN	NaN	NaN				2	2	2	12.5	12.5	12.5	34.632	0.00026532	4.3616	228430000	6
26.3656	25.7402	24.2402	26.3221	26.233	25.3652	26.9969	26.1681	26.3719	25.7315	25.9897	25.73	25.919	23.084	24.9635	25.4872	25.0568	22.0758	26.2229	25.4444	26.4884	25.4216	25.8253	26.2661	25.693	25.3363	25.5922	24.7244	26.1886	25.3037	25.3518	25.824	25.632	25.5866	25.851	25.8263				2	2	2	17.5	17.5	17.5	17.687	0	201.33	2194200000	89
27.5653	27.1067	26.7189	27.0035	27.1202	27.2712	27.5436	27.1383	27.521	26.7613	27.3405	27.0875	26.8782	27.5909	27.0044	28.0949	26.8992	27.1174	26.7488	26.3141	27.2232	27.0633	26.7691	26.6352	26.6871	26.8151	27.2479	27.0866	26.6862	27.0129	26.975	27.0401	26.9885	26.9896	27.431	27.2851				13	13	4	48.6	48.6	20.4	35.882	0	323.31	6077600000	427
21.6433	NaN	23.8634	22.8438	22.5251	23.7781	23.5369	20.7628	22.5734	NaN	23.2074	23.3275	23.8689	22.8602	23.8159	24.1727	24.9551	22.1128	23.2754	23.8892	24.25	23.199	19.93	23.5571	23.2869	22.6207	23.4198	23.2856	NaN	23.2877	23.6484	23.4575	23.8809	23.9656	23.0705	NaN				4	4	4	18.5	18.5	18.5	45.098	0	59.065	439530000	65
23.9368	23.962	NaN	24.2232	23.8997	21.7781	23.1823	24.896	23.223	24.5551	24.8076	25.3715	23.1752	21.98	23.466	25.066	22.5063	24.8628	25.3914	24.2723	23.635	24.3146	25.436	24.9437	24.3194	23.4815	NaN	23.8002	25.3414	24.1467	24.9502	24.3529	24.1917	24.7375	NaN	23.6306				2	2	2	9.6	9.6	9.6	25.409	0	20.936	1030900000	76
26.1333	24.0279	24.1415	25.5727	25.2656	25.2185	25.9812	26.3636	23.9679	24.1173	24.6362	23.9179	27.3988	24.6325	23.5843	24.1143	24.6425	25.7051	24.0429	25.1266	24.939	23.5387	24.4372	25.0968	24.0261	23.6237	25.0476	24.1824	24.8048	24.3643	22.5954	24.203	24.4731	21.9893	25.6243	25.8011				8	8	8	41.7	41.7	41.7	32.818	0	46.39	1528400000	159
NaN	NaN	NaN	20.986	NaN	NaN	NaN	NaN	23.6677	NaN	NaN	NaN	NaN	NaN	NaN	NaN	NaN	NaN	NaN	21.6804	NaN	NaN	NaN	NaN	NaN	NaN	22.1148	21.445	NaN	NaN	NaN	NaN	NaN	NaN	NaN	NaN				2	2	2	2.8	2.8	2.8	123.97	0.0064359	2.1847	25624000	4
23.5752	23.0546	24.6867	22.7394	22.3392	24.3115	24.4007	23.8943	22.9816	23.8513	24.1231	24.2733	23.5209	22.1305	24.3427	25.4124	24.4858	23.6079	22.8215	25.3684	23.7618	23.8201	22.7986	22.8541	23.489	22.9112	24.6702	24.2971	22.2379	24.4953	25.2379	22.1678	23.9508	23.1391	24.8779	22.907				6	6	6	27.7	27.7	27.7	54.177	0	213.61	852070000	129
28.7126	28.8128	29.3791	29.0851	28.2586	28.8475	28.6293	28.5206	27.9586	28.9474	28.1714	28.4952	28.2573	28.3989	29.1886	28.1536	27.579	28.0581	28.9403	28.7606	28.6056	28.3403	28.8143	29.0905	28.3289	28.5574	29.0546	29.3565	28.7765	28.5702	28.7462	28.6228	28.1337	28.5024	29.216	28.4638				10	10	10	37.5	37.5	37.5	29.386	0	323.31	23460000000	845
27.0803	27.115	27.5045	27.2067	26.7988	26.9451	26.6006	26.6055	26.0724	26.6644	26.2488	26.5168	26.7579	26.1131	27.2617	26.388	26.2834	26.8503	26.9243	26.9048	26.2841	27.0268	27.0626	27.0948	26.5623	26.2784	26.3352	27.103	27.133	26.4897	26.7966	27.2028	26.1849	26.7248	26.7562	26.6252				8	8	8	47.1	47.1	47.1	28.415	0	323.31	4449900000	226
24.0846	22.4446	21.1612	22.7978	22.7761	21.838	22.6366	21.7735	NaN	21.8277	NaN	22.5297	21.1751	21.5619	20.4667	NaN	NaN	22.5771	21.1413	NaN	NaN	NaN	NaN	21.4359	21.9214	NaN	NaN	NaN	21.8091	NaN	NaN	22.06	21.1185	21.5386	21.5453	21.193				3	3	3	16.7	16.7	16.7	37.393	0	19.602	120640000	27
NaN	NaN	22.3664	22.6419	NaN	22.944	22.6204	21.5545	NaN	NaN	21.5495	22.4974	NaN	22.629	22.7098	NaN	21.5713	NaN	21.7064	22.4254	NaN	NaN	NaN	NaN	21.7508	NaN	22.5917	NaN	21.4167	21.8903	21.9221	NaN	22.0014	NaN	21.5372	21.6957				4	4	4	12.5	12.5	12.5	59.478	0	23.663	98088000	18
NaN	NaN	NaN	23.3471	NaN	NaN	NaN	NaN	23.7787	23.686	24.4766	23.8248	23.4553	24.5982	NaN	NaN	23.7441	NaN	NaN	22.6934	23.9582	NaN	NaN	NaN	NaN	NaN	25.2916	22.7	NaN	24.738	24.5379	NaN	24.6372	NaN	23.5224	NaN				7	7	7	16.6	16.6	16.6	76.684	0	31.377	354320000	36
24.1612	24.1334	26.968	25.2572	26.1213	25.0168	25.0119	25.3937	23.1964	26.773	25.7511	27.1149	25.9428	25.5826	28.094	25.5713	26.2303	25.4483	25.5295	27.218	26.8367	26.3473	26.5247	24.8295	26.4807	26.0831	26.6144	26.9071	25.5302	27.273	27.608	26.3744	26.2575	26.6574	26.0219	24.425				16	16	16	24.8	24.8	24.8	113.08	0	323.31	3626900000	263
NaN	NaN	NaN	NaN	NaN	23.3016	NaN	NaN	NaN	NaN	NaN	NaN	NaN	NaN	22.544	NaN	19.9307	NaN	NaN	20.9989	NaN	21.1834	NaN	NaN	NaN	NaN	NaN	NaN	NaN	NaN	NaN	NaN	NaN	NaN	21.9871	NaN				3	3	3	10.7	10.7	10.7	51.713	0.00026674	4.4872	28169000	6
21.6064	25.6408	22.4055	21.8691	22.8705	23.0954	23.4225	NaN	23.6136	22.143	22.5396	22.0984	23.0065	23.9002	23.9288	23.0001	23.3062	21.6745	23.4044	22.1566	22.4009	22.4624	22.2129	NaN	23.2736	22.7421	23.3516	22.9981	NaN	23.9138	23.2207	22.8095	23.5303	22.7112	23.2721	23.1123				9	9	9	19	19	19	77.982	0	64.48	408920000	82
NaN	NaN	NaN	NaN	NaN	NaN	NaN	NaN	NaN	22.5107	NaN	NaN	NaN	NaN	NaN	NaN	NaN	NaN	NaN	NaN	NaN	23.8515	NaN	NaN	NaN	NaN	23.4443	NaN	NaN	22.8644	NaN	NaN	23.9209	NaN	NaN	NaN				2	2	2	23.8	23.8	23.8	24.824	0.00050239	3.4614	64583000	4
28.2239	27.7121	27.6138	27.4853	27.5138	28.1346	28.2944	29.0267	27.8202	28.3214	27.7005	28.2312	28.7797	27.1146	28.2131	27.4265	27.3603	28.606	28.1695	28.2874	27.5207	28.5067	28.4369	27.7336	28.0282	28.7988	27.5481	28.4492	29.2447	27.7595	27.8324	28.7359	27.4993	28.026	27.3532	28.4649				18	18	18	44.2	44.2	44.2	69.284	0	323.31	12836000000	643
28.2622	28.5682	28.2531	28.0987	28.5665	27.4865	27.1715	28.0395	27.0858	28.3796	27.5324	28.6463	27.7574	26.9484	27.8221	27.0685	26.8278	28.2719	28.3106	27.5151	27.635	28.5773	28.3563	27.9675	27.8424	28.6955	27.1155	28.3233	28.4797	27.9248	27.9422	28.7215	27.5004	28.3994	27.5478	28.0757				13	11	11	54.1	46.4	46.4	39.455	0	323.31	17685000000	634
25.2672	28.3746	27.568	27.4171	26.6706	27.9118	27.6384	26.902	29.3376	28.1892	28.9832	28.1625	28.6357	28.6203	28.0789	29.116	29.5049	27.2184	26.6267	27.5541	28.384	26.9536	26.9015	26.3339	27.8809	26.1038	28.5715	27.58	26.1358	29.77	28.7988	25.59	30.2051	27.6596	29.4442	28.0653				42	42	2	42.9	42.9	2.3	192.78	0	323.31	15719000000	779
22.1632	23.3377	NaN	23.8051	22.0544	23.5232	22.3589	NaN	25.1728	23.8553	24.2652	24.1542	24.0471	24.0546	23.8275	24.1935	24.2879	23.2318	NaN	22.6574	23.7645	23.5497	23.4919	NaN	23.1791	NaN	24.5372	23.5915	24.7044	24.78	25.0225	NaN	26.1522	23.709	25.1357	24.7692				42	3	3	42.9	3	3	192.75	0	71.631	827000000	97
27.7854	27.1721	28.0526	27.5949	25.1218	27.1809	27.3251	27.4599	26.991	28.5617	27.4338	28.5351	27.543	27.8203	29.3551	27.5487	26.4496	27.4717	27.71	28.4211	27.7799	27.9812	28.4396	28.6903	27.0072	26.7793	28.5766	29.388	28.1202	29.2458	29.0323	28.4053	27.6789	28.4957	26.5564	26.3743				4	2	2	48.2	34.2	34.2	12.146	0	262.36	11347000000	109
21.9558	21.0855	21.4988	NaN	22.6511	21.9082	NaN	22.1142	NaN	21.8316	21.4761	22.4066	20.9082	20.7056	NaN	21.4666	22.1452	22.5392	23.0628	20.4844	21.9285	22.4374	21.7466	21.9023	22.3419	21.9632	NaN	22.3444	22.6504	NaN	20.8846	22.0549	21.9485	22.3645	21.022	NaN				3	3	3	12	12	12	35.932	0	6.6665	127040000	62
NaN	NaN	NaN	NaN	NaN	NaN	NaN	NaN	NaN	21.4351	NaN	NaN	NaN	21.5873	NaN	NaN	NaN	NaN	NaN	NaN	23.1684	NaN	NaN	NaN	NaN	NaN	NaN	NaN	NaN	22.0749	NaN	NaN	22.7439	NaN	NaN	NaN				3	3	3	17.6	17.6	17.6	27.507	0	51.807	33090000	8
NaN	22.4118	NaN	31.1437	24.6249	26.4473	28.2466	NaN	27.9801	25.6342	30.3065	26.0436	25.0158	28.9747	NaN	22.8783	27.6558	NaN	NaN	NaN	27.2093	23.1249	27.0957	NaN	NaN	NaN	28.0422	NaN	NaN	NaN	25.5451	NaN	24.5156	NaN	28.7714	28.7049				4	4	3	41	41	29.5	13.532	0	145.88	7010900000	123
NaN	NaN	NaN	27.8344	21.9379	22.0513	25.8369	NaN	24.7681	22.4338	27.5665	23.5215	21.7988	26.256	NaN	NaN	24.2794	NaN	NaN	NaN	24.2251	NaN	NaN	NaN	NaN	20.2473	NaN	NaN	NaN	NaN	22.7724	NaN	NaN	NaN	25.2859	26.6938				3	2	2	24.6	13.1	13.1	13.527	0	86.839	760320000	26
24.9638	24.548	24.8019	25.5111	25.1598	25.4509	25.2372	23.5308	25.0798	23.6961	24.3813	23.552	24.7233	25.1167	24.6169	24.43	23.8362	24.511	23.7519	23.1008	25.4608	24.9499	24.2846	24.1413	24.5707	24.9597	23.4659	24.7885	25.4312	24.5912	23.7857	24.2546	23.8512	25.2191	25.0431	25.7056				6	6	3	35.6	35.6	20.7	34.196	0	65.677	1112000000	129
NaN	NaN	NaN	NaN	NaN	24.3683	NaN	NaN	NaN	NaN	NaN	NaN	NaN	NaN	NaN	NaN	NaN	NaN	NaN	NaN	NaN	NaN	NaN	NaN	NaN	NaN	NaN	NaN	NaN	NaN	NaN	NaN	NaN	NaN	24.3597	NaN				3	3	3	16.9	16.9	16.9	21.33	0.0057739	2.1951	43750000	6
28.8543	27.7945	27.851	28.4535	28.3883	28.8882	29.6563	28.7909	29.1924	28.5696	29.2108	29.2149	29.8866	29.656	28.4838	27.9421	28.1839	28.7981	28.0387	28.7189	28.6232	28.3112	28.614	27.7376	28.3168	28.4325	28.7432	28.4355	28.6418	28.4381	30.0483	28.4793	28.751	28.622	29.132	30.4513				20	19	10	53.2	51.2	32	70.051	0	323.31	19991000000	771
26.3876	26.2221	26.8351	26.7412	24.9914	25.6024	25.9836	25.7564	25.4018	26.6768	25.8086	25.93	25.9776	25.5102	26.4947	25.3942	24.4725	25.6769	26.9729	25.9711	26.5037	24.4839	26.0287	26.8215	26.2465	25.781	25.8604	26.7575	26.0918	25.8389	25.8429	26.2886	25.9369	26.3257	26.211	24.8534				4	4	4	26.7	26.7	26.7	27.872	0	264.02	2752900000	77
NaN	NaN	NaN	25.9371	22.9526	NaN	23.8845	NaN	22.0978	NaN	24.4527	23.2231	24.2977	NaN	NaN	25.0409	24.3651	24.8955	NaN	22.9687	23.7517	NaN	NaN	22.4988	22.7525	NaN	24.0469	23.1073	NaN	23.5122	23.6565	NaN	24.0284	NaN	NaN	23.407				8	6	6	33.4	31.2	31.2	48.934	0	10.18	453150000	20
30.2903	26.8666	27.1997	30.3471	28.9248	30.4781	31.4396	29.604	31.7605	30.6573	32.8418	31.1985	31.3467	32.1207	30.9092	32.4101	31.028	28.6771	28.2051	30.5816	31.2604	29.0578	28.9372	27.7497	30.4105	27.0909	32.172	30.0103	28.8943	31.8665	31.3044	28.0255	32.5621	29.679	30.8112	28.8006				14	14	8	41.2	41.2	27.4	49.328	0	323.31	88132000000	466
20.6175	20.4557	21.1593	24.9492	22.6156	22.9088	23.2127	NaN	23.4366	20.0771	24.2942	23.1904	23.0458	23.7194	22.8568	24.4294	24.7262	21.3459	21.1816	21.0415	23.9439	22.3295	NaN	NaN	22.6062	NaN	24.6187	22.6804	21.464	24.2051	21.5742	21.9371	24.6703	21.7759	23.1303	22.4224				6	2	2	48.6	17.3	17.3	23.379	0	273.81	611180000	85
32.5306	31.4916	30.4513	32.2058	32.3794	31.2015	31.6709	31.7747	31.6776	31.1119	31.6471	31.3208	31.4794	31.1386	30.1604	30.8753	30.2601	31.9584	31.6947	30.1095	32.2618	30.9763	31.4786	31.3392	31.7659	31.7675	30.0213	31.2079	31.9019	30.9015	30.4034	32.1432	31.2969	31.7425	31.5674	32.0121				11	11	10	86.6	86.6	86.6	16.837	0	323.31	148150000000	1970
23.9188	24.1062	23.3104	24.0262	23.346	22.4704	NaN	22.4566	24.2139	23.7208	23.1986	23.7416	21.8705	NaN	NaN	22.7448	NaN	23.4596	22.804	NaN	23.2392	23.4444	23.3299	23.3598	22.2476	22.9036	22.0735	NaN	23.2971	NaN	NaN	23.2787	22.6719	NaN	24.4804	24.56				2	2	2	20.9	20.9	20.9	17.652	0.00027189	4.8993	394620000	41
28.7467	30.7065	26.0727	34.2441	33.291	25.901	25.3031	NaN	31.8175	29.1833	29.2158	29.0249	26.5302	33.1783	26.491	32.0871	28.9763	27.421	26.9705	27.5701	30.77	27.6151	NaN	31.1884	29.6232	27.0321	28.5209	27.7141	23.7411	28.744	27.3693	27.7914	29.8785	30.6813	32.1527	31.138				5	5	5	23	23	23	18.354	0	323.31	77543000000	440
23.3821	24.5453	24.6336	24.7629	25.2725	23.9432	23.3907	24.643	24.1477	24.7939	23.9631	25.1563	24.6274	24.1576	24.2966	24.4925	26.2675	24.3454	24.801	23.8437	25.027	25.2571	24.4891	24.6307	24.7756	24.5249	24.9257	24.5337	24.1764	24.7609	24.4043	25.2724	24.5019	24.2107	23.3986	23.7525				9	9	9	27.5	27.5	27.5	60.67	0	45.498	1182800000	150
27.3094	25.6383	24.4656	27.153	25.141	26.9467	26.6846	25.0361	27.2643	24.9495	26.1829	26.0179	26.9926	24.8891	24.3406	25.836	26.6788	26.6162	25.6563	25.3009	26.3836	26.1328	25.9405	26.2216	26.949	25.3761	25.2553	26.2126	25.9403	25.6528	25.2373	26.0351	25.3478	25.376	26.9649	26.6875				12	12	12	23.9	23.9	23.9	105.32	0	157.27	3363300000	316
24.6541	25.7737	24.8575	25.5448	25.2731	25.8732	25.6821	24.4796	24.6967	23.4578	24.196	24.4553	24.9799	23.6883	23.6742	24.3815	25.1967	25.1715	24.6855	24.4893	23.8197	24.9528	NaN	25.3055	24.6935	24.6859	24.8017	24.5026	24.6359	24.862	NaN	25.3325	23.0228	23.5565	25.0823	24.5019				5	5	5	22.9	22.9	22.9	23.48	0	323.31	1467800000	92
NaN	22.7734	22.4124	21.8857	22.346	NaN	21.0026	21.5631	21.9933	21.5864	20.8247	21.7913	21.8809	21.0029	22.5215	24.0401	22.9968	21.504	22.2185	22.7184	23.5986	22.1934	22.3862	22.2068	22.2056	21.9536	21.789	22.346	21.6853	21.9211	21.0312	21.8387	21.828	21.3834	22.3287	22.0978				6	6	4	12.2	12.2	9.1	67.585	0	12.406	197880000	65
NaN	23.2405	23.4083	21.6989	23.245	21.86	21.7679	NaN	NaN	22.7785	21.418	NaN	NaN	NaN	24.0256	23.1439	21.9957	21.6973	23.3198	22.2583	22.5972	23.2275	21.4834	23.1084	22.4535	23.5733	22.341	23.2603	22.1312	23.007	22.566	22.5161	NaN	22.5998	NaN	NaN				3	3	3	37.6	37.6	37.6	22.337	0	27.836	241640000	39
21.2166	23.8873	25.309	22.9942	NaN	24.2402	23.9048	23.9094	22.4062	24.1503	23.4458	24.0777	24.3427	24.3385	25.5699	23.0512	25.8555	22.1667	22.6701	24.9423	24.0032	24.9453	22.2929	23.7688	23.478	23.37	24.8139	24.9744	24.1992	24.8529	23.9363	23.0177	24.0821	21.7243	23.8508	NaN				10	10	10	24.9	24.9	24.9	68.996	0	178.48	761270000	100
30.7902	29.1021	27.9147	29.6853	29.8276	31.9873	29.7901	31.8461	29.7059	28.6976	29.6295	29.7647	28.7696	29.2928	28.0769	29.3521	29.7039	30.4195	29.3017	29.8267	29.2072	28.6116	30.6781	30.217	28.7986	28.7481	28.9629	28.676	30.8789	27.9374	28.4529	29.1517	28.2637	29.0209	29.8797	30.4888				7	7	7	68.6	68.6	68.6	11.737	0	323.31	37912000000	406
26.4583	25.687	25.9107	26.1872	24.9364	NaN	26.378	26.279	25.8037	25.3603	25.3596	24.863	25.2432	25.1461	NaN	25.0457	NaN	22.3167	26.4533	25.1423	24.6338	25.0638	25.9183	26.0749	24.7166	24.3251	24.6426	26.1771	25.9129	24.903	25.1168	25.9178	24.0201	25.4055	24.7981	NaN				3	3	3	33.3	33.3	33.3	13.696	0.00027108	4.839	1583400000	46
26.1156	NaN	NaN	25.3548	24.8924	24.5163	24.9782	25.8656	25.0437	24.6431	24.4449	24.1936	25.2443	24.6371	24.8362	24.8178	23.5892	25.1351	NaN	24.8908	23.7303	24.385	25.1259	24.9401	23.9985	23.4447	24.2659	24.1852	25.6781	24.0632	23.2985	24.1399	24.294	24.1887	24.5023	24.8649				3	3	3	10.6	10.6	10.6	52.488	0	107.88	964080000	71
NaN	NaN	NaN	NaN	NaN	NaN	NaN	NaN	22.7546	22.1272	23.4234	NaN	22.6894	22.5904	22.7122	22.8083	NaN	NaN	NaN	22.1864	NaN	NaN	NaN	NaN	23.7435	NaN	NaN	NaN	NaN	23.4303	22.9691	21.5723	24.832	NaN	NaN	NaN				4	4	4	9.3	9.3	9.3	93.517	0	5.4671	133510000	18
26.5626	26.5119	26.7161	26.3136	26.3672	26.8811	25.3062	26.3383	26.8926	27.0669	26.3427	26.7771	27.3218	26.5502	27.3309	25.8797	26.4857	26.2715	25.9958	26.9047	27.1749	27.4581	26.1568	26.2058	27.3004	27.6409	26.4364	26.4428	26.6553	26.3688	26.4004	26.9898	26.7287	27.589	26.6771	26.5165				8	8	8	34.4	34.4	34.4	42.981	0	323.31	4588400000	179
23.9326	24.3046	25.4519	23.8812	24.3709	24.5848	23.6973	24.5293	23.9299	24.856	23.5943	23.984	24.4012	23.1993	25.5847	24.4951	23.2414	23.3373	24.6449	24.843	24.6157	24.0852	23.9888	25.3256	23.5565	23.6737	24.4228	24.0124	24.2966	24.8823	24.8553	24.5052	24.4186	23.9274	24.3342	24.1655				4	4	4	24.8	24.8	24.8	31.462	0	44.04	947370000	121
26.972	26.7148	27.6241	26.8389	26.9446	27.7345	28.1549	27.5499	26.9871	27.5593	27.9663	27.9234	28.072	28.1144	27.751	27.2311	27.7069	26.4664	26.0184	28.1888	27.9555	27.9743	27.1568	26.8027	26.817	26.0198	28.446	27.722	26.4478	28.2815	28.4058	26.734	27.7912	27.4857	28.307	27.9874				17	17	17	42.6	42.6	42.6	61.054	0	323.31	10445000000	641
26.9813	28.243	28.0934	27.8735	27.242	28.9382	27.8838	28.1367	27.6993	28.5411	27.9366	29.7349	26.7636	26.0422	26.4789	28.6135	28.7819	27.4032	27.4661	26.9632	27.4048	27.7608	27.8545	27.3192	26.482	26.7685	26.3341	27.4058	27.8241	28.0596	30.0368	27.8806	28.2702	28.0907	29.8251	27.1434				6	6	6	17.8	17.8	17.8	48.803	0	323.31	13501000000	290
NaN	NaN	27.4343	NaN	NaN	NaN	NaN	NaN	NaN	NaN	NaN	NaN	NaN	NaN	NaN	NaN	NaN	NaN	NaN	NaN	NaN	21.383	NaN	NaN	NaN	NaN	NaN	NaN	NaN	NaN	NaN	NaN	NaN	NaN	NaN	NaN				4	4	4	50	50	50	18.789	0	225.82	167610000	5
29.7088	28.7664	29.0484	29.8605	29.3724	30.1493	30.8103	29.9091	30.1069	29.4134	30.07	29.8458	30.2142	30.8653	29.5893	29.7228	29.4854	29.3714	28.6594	29.9507	29.8975	29.1898	29.2585	28.418	29.4687	28.6949	30.8333	29.5544	29.4194	29.9385	29.9361	29.0242	30.3245	29.2903	30.0343	30.0553				21	20	20	39.3	39.3	39.3	72.332	0	323.31	38775000000	824
23.3151	23.7534	23.9526	24.3635	22.7061	25.6594	25.2249	22.552	25.1961	25.6608	25.451	25.0491	25.8236	26.0858	26.4574	24.9877	24.736	24.3078	23.244	24.6678	24.699	NaN	NaN	23.6056	24.1532	22.4392	26.4155	25.1055	NaN	26.3193	26.6375	23.0963	25.6241	24.2801	23.677	22.727				14	14	14	14	14	14	177.6	0	237.03	1395800000	138
25.8603	24.209	24.3834	25.627	24.8663	25.8263	26.6684	25.0127	26.2821	24.6409	24.9349	24.9091	25.6638	25.6571	23.8793	24.7528	23.5649	25.7222	24.3742	24.2741	24.8723	24.7924	25.0699	25.1083	24.6931	23.861	24.1316	24.6303	25.5754	23.8463	23.966	24.3719	23.8804	24.2055	24.7384	25.6282				9	9	9	23.9	23.9	23.9	48.344	0	106.78	1324100000	137
31.5315	30.8227	30.7814	31.1875	31.2714	30.8675	31.2131	31.2874	30.9411	31.3247	31.0445	31.4507	31.5024	31.2512	31.2362	30.3867	30.4684	31.1328	30.9024	31.3807	30.959	30.8851	31.6164	30.7384	31.353	31.3925	31.1743	31.0441	31.2793	30.9666	31.1904	31.5388	31.0105	31.3808	31.1506	31.8653				25	25	18	62.8	62.8	50.8	70.897	0	323.31	99263000000	1883
NaN	NaN	22.1299	22.3734	NaN	22.8448	NaN	NaN	22.2232	21.8348	23.2849	21.8732	NaN	NaN	NaN	21.6503	24.2288	NaN	NaN	21.8433	NaN	NaN	NaN	NaN	21.9564	21.5871	22.3707	23.0612	NaN	22.3281	NaN	21.3024	22.2827	22.1055	23.1514	23.0227				3	3	3	6.7	6.7	6.7	54.083	0	5.5114	146950000	26
NaN	22.6342	NaN	NaN	NaN	NaN	NaN	NaN	NaN	NaN	23.4117	23.8456	NaN	NaN	NaN	NaN	NaN	NaN	22.8958	22.884	NaN	NaN	NaN	NaN	23.1713	NaN	NaN	23.3728	NaN	NaN	23.5275	23.6652	NaN	NaN	NaN	NaN				3	3	3	7.2	7.2	7.2	81.234	0.00049925	3.3856	140370000	8
23.6987	24.0798	24.6055	24.229	24.6366	23.9755	23.5237	23.8614	23.2713	24.4199	23.6531	24.387	23.6623	23.1716	24.3	23.7063	NaN	24.5216	24.5171	23.096	23.8151	24.6056	24.3703	23.8781	23.8785	23.8655	24.2495	24.2447	24.1972	23.9644	24.0193	24.3092	24.2462	24.1339	23.5798	23.9415				11	11	11	34.8	34.8	34.8	52.221	0	107.08	700990000	133
24.8912	24.6403	26.4432	25.2645	24.2485	25.4651	25.5056	25.4623	24.1412	25.2263	24.7154	25.0107	25.5942	24.8871	26.2475	22.9935	24.5599	24.3716	25.0265	25.2269	25.2819	25.052	24.5814	25.532	24.2006	23.6876	25.5552	25.7557	24.4305	25.5833	25.9689	25.5091	25.2003	24.9399	25.625	21.7573				9	9	9	34.5	34.5	34.5	39.233	0	101.31	1601300000	208
27.3519	26.2318	25.7964	27.3489	26.9355	27.2241	27.1952	21.8574	29.2362	25.4952	27.4688	27.3589	25.3895	28.2293	25.446	27.6964	26.7836	25.9151	26.1121	25.7087	26.6299	26.0409	25.7524	25.6871	26.5715	24.7203	27.3334	25.8134	26.3324	25.7486	26.7004	25.9802	26.6815	26.6629	28.7439	29.4728				25	25	25	30	30	30	127.18	0	323.31	4906100000	328
25.5451	25.9896	26.0832	25.7908	26.2284	25.9778	25.4792	26.0235	25.4093	25.9401	25.4761	25.716	26.0419	25.743	26.4073	26.4087	26.1675	26.514	26.5499	26.0177	26.3802	26.2643	25.8658	25.8464	26.3808	27.1162	25.748	26.2594	26.0846	26.0982	25.7668	26.3872	25.9526	26.2352	25.6737	25.4876				17	17	13	30.1	30.1	23.5	96.695	0	264.87	2894600000	247
NaN	23.9815	24.982	NaN	NaN	NaN	NaN	22.6683	NaN	NaN	NaN	NaN	22.2679	NaN	NaN	22.9192	23.3437	NaN	22.1885	22.1519	NaN	NaN	NaN	22.0721	NaN	NaN	NaN	NaN	NaN	NaN	20.2418	NaN	NaN	22.8577	NaN	NaN				12	7	7	20.8	12.8	12.8	97.091	0	34.107	134160000	15
24.9098	23.6823	NaN	23.9362	23.748	23.3211	NaN	NaN	24.5945	23.1426	NaN	22.7001	23.8252	NaN	NaN	23.561	NaN	23.7525	23.8037	23.4293	NaN	NaN	24.5208	23.987	24.2451	23.5947	24.0797	NaN	24.3005	23.6426	23.6696	NaN	NaN	23.5098	23.4009	NaN				5	2	2	39.3	14.1	14.1	23.567	0	30.375	410780000	28
24.2099	23.1168	23.1885	23.6458	23.9593	24.684	23.4372	25.023	24.1132	23.2674	24.0385	24.0975	24.6865	24.7294	23.4237	22.0599	23.3288	23.6907	22.8206	23.3985	23.8503	23.9764	23.6841	23.078	23.5097	22.1954	24.4649	22.8089	23.274	23.6153	23.1289	22.879	23.6303	23.7036	24.7314	24.6225				7	7	4	51.5	51.5	26.2	23.408	0	48.7	605910000	113
NaN	NaN	21.7507	NaN	NaN	NaN	NaN	NaN	NaN	NaN	NaN	NaN	NaN	NaN	NaN	NaN	NaN	NaN	21.1202	NaN	NaN	19.9305	NaN	NaN	NaN	NaN	NaN	NaN	NaN	NaN	NaN	NaN	NaN	NaN	NaN	NaN				3	2	2	3	2.2	2.2	137.73	0.00027732	5.3333	6199800	5
NaN	NaN	NaN	NaN	NaN	23.9324	NaN	NaN	20.7886	NaN	23.4616	NaN	22.1752	23.8294	23.2503	NaN	25.6078	NaN	NaN	NaN	NaN	NaN	NaN	NaN	21.5311	NaN	21.5516	23.8427	NaN	22.995	19.9801	NaN	22.6579	NaN	20.603	NaN				11	10	10	6.7	6.3	6.3	242.8	0	165	215900000	54
25.0461	26.9642	24.7978	24.957	25.8545	26.0238	25.4978	25.2851	26.3045	24.7274	25.2059	24.8439	24.9676	24.603	23.775	26.7628	28.5505	25.8128	24.928	24.6819	26.4312	25.2685	25.0801	25.3118	25.4098	25.3566	24.1139	24.6059	25.2745	24.2821	24.0909	24.3706	24.5562	24.3633	25.5384	25.4705				2	2	2	6.6	6.6	6.6	38.985	0	168.05	3017000000	95
25.1348	24.7219	26.1461	24.943	NaN	25.0304	25.3888	26.5564	24.5934	25.0736	25.036	24.6466	24.6185	25.6748	24.5025	24.9313	24.3766	25.3565	24.497	25.7921	24.244	24.5896	24.7927	25.6696	24.5562	24.2913	24.9687	26.0086	24.9959	25.7081	24.9656	24.7965	24.9706	24.206	25.2533	NaN				6	6	6	17.6	17.6	17.6	46.588	0	323.31	1356200000	92
NaN	NaN	22.3719	NaN	NaN	NaN	NaN	NaN	NaN	NaN	NaN	NaN	NaN	NaN	NaN	NaN	NaN	NaN	NaN	22.4692	NaN	NaN	NaN	NaN	NaN	NaN	NaN	NaN	NaN	NaN	NaN	NaN	NaN	NaN	NaN	NaN				3	3	3	6.4	6.4	6.4	90.725	0.0025534	2.5682	13660000	5
27.8682	27.0739	27.2153	27.3457	27.1054	27.455	27.5563	28.0086	27.8518	27.0088	26.9864	27.1539	27.5125	27.579	27.2	27.2939	26.0774	27.5767	27.0317	27.5004	27.1436	26.9185	27.3254	27.2238	27.0512	27.5894	26.7732	27.2784	27.7664	26.8662	26.6978	27.2674	26.838	27.0861	27.5909	28.3229				16	16	16	35.3	35.3	35.3	59.256	0	323.31	6865000000	454
NaN	NaN	NaN	24.3374	23.5211	NaN	NaN	NaN	NaN	NaN	NaN	NaN	NaN	NaN	NaN	NaN	NaN	23.6427	NaN	NaN	NaN	NaN	NaN	NaN	NaN	NaN	NaN	NaN	NaN	NaN	NaN	NaN	NaN	NaN	NaN	NaN				2	2	2	14.6	14.6	14.6	17.776	0.0066108	2.129	58161000	5
NaN	NaN	NaN	NaN	NaN	NaN	NaN	NaN	NaN	NaN	NaN	NaN	NaN	NaN	20.4009	NaN	NaN	NaN	NaN	20.3197	NaN	NaN	NaN	NaN	NaN	NaN	NaN	NaN	NaN	NaN	NaN	NaN	NaN	NaN	NaN	NaN				2	2	2	3	3	3	129.63	0.0021122	2.6449	7347100	4
NaN	NaN	NaN	NaN	NaN	23.7704	NaN	23.5247	NaN	NaN	NaN	NaN	23.6227	NaN	NaN	NaN	NaN	NaN	NaN	23.3827	NaN	24.36	NaN	NaN	NaN	NaN	NaN	23.5116	23.984	NaN	NaN	NaN	NaN	NaN	NaN	23.6843				3	3	3	1.5	1.5	1.5	425.64	0.00409	2.4099	117500000	7
27.5744	26.9786	27.4187	27.2516	27.3628	27.4977	27.4265	27.5364	26.4937	27.1709	26.947	27.1878	27.0071	26.8012	27.5219	26.2296	26.7965	27.6329	27.4503	27.4539	26.5067	27.3501	27.4242	27.5754	27.2921	26.9297	27.2358	27.035	27.2567	26.7339	27.0791	27.3705	26.932	27.2857	27.1272	27.3843				18	18	18	26.4	26.4	26.4	101.56	0	273.32	6004800000	311
27.5125	30.3304	25.9103	32.3096	31.0477	27.4392	20.6985	22.9927	31.3427	28.9187	29.2549	28.5244	26.0651	33.2836	28.8359	32.5742	29.8418	24.8382	25.1429	28.7713	31.1764	27.102	NaN	31.0308	28.4932	24.8683	30.9198	28.3877	21.7543	30.6168	29.078	25.9168	30.2379	30.0715	31.3476	29.1499				25	22	22	44.3	38.9	38.9	81.04	0	323.31	74557000000	1257
23.6966	NaN	22.4172	20.6224	22.9286	23.6671	23.4197	25.3446	23.2294	22.4046	23.2433	23.2755	22.9681	22.6161	22.2617	NaN	NaN	23.6149	NaN	25.832	22.3777	21.64	23.2552	21.2516	21.342	22.1782	23.4912	23.152	NaN	22.2063	23.574	22.6604	NaN	22.7568	21.5519	NaN				14	14	14	10.5	10.5	10.5	274.37	0	78.502	321570000	91
25.3014	25.0448	25.1674	24.8852	24.7338	24.9942	24.4753	25.1384	24.7997	25.2501	24.7424	25.029	24.5785	25.4716	26.1954	24.2215	24.6787	NaN	25.1578	25.244	25.0823	25.2612	25.0034	24.7885	24.8738	24.9901	24.552	25.1015	25.3244	24.757	25.1498	25.3375	24.9646	25.3189	23.9458	23.7853				7	7	7	34.8	34.8	34.8	39.724	0	73.092	1260700000	118
NaN	NaN	NaN	NaN	NaN	NaN	NaN	NaN	NaN	NaN	NaN	NaN	NaN	NaN	NaN	NaN	NaN	20.2924	NaN	NaN	NaN	NaN	NaN	NaN	NaN	NaN	NaN	NaN	NaN	NaN	NaN	NaN	NaN	NaN	NaN	NaN				3	2	2	11.9	9.2	9.2	33.729	0.0077872	1.9569	5805900	2
NaN	25.2644	25.3721	21.7329	23.4651	NaN	NaN	NaN	NaN	NaN	NaN	NaN	NaN	23.7805	25.9135	22.9008	22.3574	NaN	25.8529	NaN	NaN	25.1112	NaN	NaN	23.5015	26.8471	NaN	24.5926	NaN	NaN	NaN	19.7661	NaN	24.7077	22.5767	23.3346				4	4	4	18.2	18.2	18.2	33.077	0	55.489	473930000	29
27.106	27.1266	26.8693	25.5203	26.8682	25.7279	25.6106	26.6024	25.3551	27.1573	25.4477	26.9043	26.2921	25.8047	27.243	26.2277	26.8886	27.0217	27.0339	27.0972	26.5792	27.1739	26.5776	27.1672	26.6185	26.8843	25.9428	27.1669	26.3311	26.2829	26.4536	27.1896	25.1459	27.2043	26.2237	25.9902				8	8	3	36.8	36.8	14	35.054	0	323.31	5665200000	226
26.9632	27.1791	27.5912	27.6068	27.2826	27.3348	27.5645	27.3556	26.9751	27.6308	26.8297	27.4946	27.5907	27.2575	27.5557	26.4212	26.7483	27.3219	27.3071	27.6586	27.434	27.4595	27.5552	27.3815	27.2869	26.8763	27.8115	27.3383	26.9964	27.0774	27.5266	27.7009	27.3688	27.4353	27.5143	26.8473				16	16	10	38.7	38.7	23.6	70.67	0	323.31	7730600000	419
27.2917	26.0673	24.8038	26.7523	26.5703	25.8406	25.3804	26.5926	24.5043	24.9792	25.6005	25.0351	24.9435	23.4522	24.7959	25.5521	23.2204	26.7338	26.191	25.1549	25.8538	25.8432	27.1435	26.3379	25.8839	26.273	24.7519	25.1442	25.7252	24.7422	23.6008	26.1501	25.1816	26.1487	26.8385	26.4023				8	8	8	52.9	52.9	52.9	28.768	0	323.31	2452100000	204
26.729	26.5354	26.6377	26.3465	26.259	26.6501	26.2051	26.7943	25.8766	26.7466	26.0415	26.4454	26.8157	26.3318	26.6812	25.8605	26.2348	26.4856	26.6786	26.7753	25.8334	26.6843	26.7727	26.4846	26.633	26.7868	26.5753	26.8035	26.7503	26.3963	26.6807	26.745	26.3657	26.6874	26.7719	26.7777				16	16	12	46.6	46.6	38.7	54.846	0	323.31	3847800000	315
30.0117	30.1519	30.3224	29.7439	29.2988	32.3811	31.8162	30.5837	32.2327	32.4771	33.0766	31.2515	31.7248	33.0612	31.895	34.2795	32.0907	30.228	29.342	32.0104	31.3971	30.5261	29.4672	29.9666	31.2313	29.4499	32.1494	31.6988	30.0946	33.4636	32.5796	28.7782	33.4189	31.9572	32.4097	29.4561				31	31	31	43.2	43.2	43.2	108.53	0	323.31	213540000000	4791
28.9515	29.1283	29.0489	28.9148	28.9475	31.1237	30.6749	29.0774	30.7064	31.1177	31.4134	29.9578	30.0892	31.4779	30.3857	33.1516	30.6146	29.4846	28.3239	30.8288	30.3678	29.9794	28.1779	28.7012	30.0977	28.892	30.564	30.3575	29.2281	32.1451	31.5208	27.9844	31.5502	30.5332	31.0021	28.3838				24	24	4	31.3	31.3	4.7	108.58	0	323.31	108540000000	2013
30.7885	30.9565	31.9268	31.1518	31.036	33.8252	33.5493	31.7043	33.4553	33.9003	34.7037	32.7922	33.2295	34.8292	33.4275	35.5113	33.7412	31.533	30.7645	33.545	32.9698	32.3529	30.6877	31.1547	32.8299	30.3168	33.7464	32.9917	30.9941	35.2636	34.3909	29.718	34.7902	33.1221	33.485	30.5143				118	118	118	52.1	52.1	52.1	343.67	0	323.31	627000000000	9763
23.8704	23.2202	25.936	24.3767	24.6268	25.5266	26.1619	25.6998	24.4592	25.9001	26.2353	25.4266	25.158	25.5817	26.9637	24.9935	25.3229	23.2473	NaN	27.0813	25.1979	24.6976	24.1993	24.2043	24.0636	23.5524	26.3873	25.8877	23.1523	26.848	26.4919	23.4005	25.7286	25.0534	25.5849	22.7779				9	9	3	34.9	34.9	7.4	32.866	0	68.902	1847200000	203
24.8439	26.0294	25.2622	25.9525	25.8726	24.5935	23.7044	25.168	24.3287	25.3668	24.6698	25.3886	25.3595	24.245	25.6246	25.0243	25.2464	25.4709	26.0589	25.2957	25.3376	25.3191	25.4809	25.062	25.7935	25.8206	25.3728	25.3087	25.1783	25.1827	25.0253	26.082	25.3312	25.6938	25.4968	26.7338				11	11	11	27.8	27.8	27.8	55.804	0	108.48	1766200000	161
24.2227	24.9829	25.3949	24.7491	24.5899	24.5086	23.8341	23.168	23.261	25.1961	25.1683	26.2219	25.0623	25.0057	25.5155	25.7686	26.1823	24.7458	24.8344	25.942	25.2829	26.0358	24.7799	23.6469	26.0403	24.2888	25.7796	25.3151	25.61	26.0069	26.4006	24.8065	24.7277	25.1395	24.6819	23.1787				21	21	21	13.7	13.7	13.7	267.29	0	323.31	1651400000	183
23.7507	24.0172	23.1455	23.4796	22.0729	24.9125	NaN	NaN	23.7902	22.5505	23.9161	24.1635	NaN	24.9839	23.1936	24.1024	25.1544	24.6899	22.6492	23.5034	25.1021	24.6103	NaN	NaN	24.1609	23.6461	24.3581	22.8895	24.9511	22.4582	NaN	NaN	NaN	22.3636	23.7664	21.7666				9	9	9	36	36	36	42.644	0	217.48	570700000	77
NaN	NaN	NaN	NaN	NaN	25.9529	25.1523	26.5766	NaN	NaN	NaN	NaN	25.5778	NaN	NaN	NaN	NaN	25.7773	26.3278	24.6932	NaN	NaN	NaN	NaN	NaN	NaN	NaN	NaN	25.5525	NaN	NaN	NaN	NaN	NaN	NaN	25.7591				3	3	3	11.9	11.9	11.9	38.794	0	16.107	661120000	27
21.8282	24.5601	24.5631	26.0616	23.8362	23.5411	23.1097	21.6615	28.3694	23.8115	26.7991	26.8532	25.0437	22.0969	23.4863	22.264	26.7398	22.6791	23.8189	21.4825	23.3475	24.1905	23.6281	22.7265	24.7392	23.5438	25.7993	23.8295	22.4538	22.3235	26.031	24.1854	26.2563	25.39	23.269	30.0509				11	11	11	42.1	42.1	42.1	36.375	0	323.31	2106600000	141
NaN	NaN	NaN	NaN	NaN	20.9462	NaN	NaN	NaN	NaN	NaN	21.817	20.6099	NaN	22.9887	NaN	NaN	NaN	21.7647	21.7204	NaN	NaN	NaN	NaN	NaN	NaN	22.8991	20.3431	20.4406	NaN	22.2171	20.5312	NaN	NaN	NaN	NaN				2	2	2	6.7	6.7	6.7	50.47	0.00074534	3.3326	45757000	8
28.7091	31.8238	27.4777	34.1487	33.3224	28.0675	26.6185	23.3635	31.8572	29.1238	29.3925	29.8598	26.8123	33.1274	27.4915	33.4418	29.7948	26.7813	27.0906	27.6248	32.6465	29.2132	25.8899	32.1037	29.8653	26.5129	30.293	28.6169	NaN	29.8902	29.0415	27.9409	30.5068	30.4677	32.1282	31.3549				4	4	4	31.2	31.2	31.2	18.385	0	323.31	113000000000	437
27.2744	21.3414	22.8182	24.4816	22.7755	27.3281	25.8983	24.7243	24.2736	NaN	23.5373	22.3768	25.9608	24.3361	20.6493	23.1646	NaN	24.0684	NaN	25.0098	20.5493	NaN	NaN	23.556	NaN	NaN	22.4853	NaN	20.341	21.1332	NaN	NaN	NaN	NaN	26.0788	21.9225				18	18	18	18.7	18.7	18.7	149.71	0	247.22	774190000	95
NaN	NaN	30.7756	18.5751	NaN	18.0604	NaN	NaN	NaN	NaN	NaN	NaN	NaN	NaN	NaN	NaN	NaN	18.0025	NaN	NaN	NaN	18.1638	NaN	NaN	18.4338	NaN	NaN	NaN	NaN	NaN	NaN	NaN	NaN	18.6272	17.6178	17.8493				34	34	12	25.8	25.8	10.3	223.09	0	323.31	1987800000	95
22.7454	22.1637	21.5901	NaN	22.2527	NaN	22.2038	24.3859	21.9835	NaN	NaN	22.7209	23.2836	22.8344	23.0345	NaN	NaN	22.9344	NaN	24.7922	23.1046	22.3383	21.3964	22.0319	21.025	NaN	22.6154	NaN	23.9954	22.4773	20.8891	23.427	NaN	22.8654	NaN	NaN				7	5	4	18.7	15.9	13.4	59.834	0	112	203250000	33
27.0578	27.1102	26.3224	26.9919	27.0555	26.7283	27.5505	26.805	26.5774	26.1831	26.9351	26.3977	26.9107	26.8368	26.1118	26.3114	26.2429	26.5473	26.7392	25.9713	26.5631	26.7599	26.5045	26.84	26.396	26.6084	26.3554	26.5073	26.9973	26.2384	26.0395	26.5206	26.1309	26.6262	26.3681	26.1816				12	12	12	37.1	37.1	37.1	54.548	0	323.31	4134400000	303
28.3112	28.5333	28.7305	28.795	28.5835	28.1245	28.0807	28.3504	27.8887	28.8625	28.3419	28.7607	28.1195	27.956	28.937	28.4789	27.9921	28.3255	28.5109	28.8476	28.2072	28.6998	29.1177	27.7621	28.8323	29.0504	28.8987	28.9895	29.0244	29.0829	29.3271	29.0194	28.7342	28.8726	28.2282	28.4603				22	22	22	41.1	41.1	41.1	69.842	0	323.31	18159000000	963
27.4855	28.0435	28.0418	27.1132	27.449	27.8242	27.1803	27.2745	26.8388	27.8406	27.2707	27.3609	27.2135	26.8886	28.6512	27.6024	28.1932	26.8923	27.4483	27.9793	27.9978	27.9466	27.9114	26.8789	28.4026	28.3717	28.1249	28.1426	28.0187	28.1306	28.4281	28.2961	27.5339	27.7133	27.8223	28.2098				23	23	23	58.3	58.3	58.3	82.704	0	323.31	11148000000	585
21.8268	22.2619	23.6342	22.9223	NaN	24.3107	23.857	24.0155	22.7418	23.9292	23.3357	23.5209	NaN	NaN	NaN	23.3907	NaN	NaN	22.9566	24.2447	23.5619	22.6632	NaN	NaN	22.5487	NaN	23.712	25.1063	19.3067	24.6835	23.7402	22.7344	24.1244	23.6372	24.7196	NaN				2	2	2	13.6	13.6	13.6	19.576	0	19.389	447710000	26
28.3119	26.136	25.2052	29.118	27.3917	27.3789	27.1257	27.4208	28.5359	26.2655	27.0107	26.7923	26.939	26.7714	24.0026	26.8069	26.1067	27.1272	26.6964	25.8879	27.1913	26.7278	26.1921	27.6378	25.0032	25.6012	25.3776	26.1848	28.1714	26.8266	25.071	27.4982	27.3002	26.8069	28.642	27.567				2	2	2	22	22	22	27.963	0	112.7	9328900000	309
27.5106	28.1312	25.2255	26.846	27.6075	27.0151	27.1351	27.7524	27.325	26.0036	26.3494	26.824	26.2019	26.6129	24.795	27.8616	27.9985	26.8992	25.8774	25.5056	26.9373	26.5911	26.5487	26.8758	25.9713	26.0682	25.2154	25.855	27.5175	25.2345	24.9943	26.1967	25.5257	25.8989	26.8809	28.0669				3	3	3	7.1	7.1	7.1	44.96	0	75.015	5148000000	192
29.2409	29.4506	28.7094	29.2786	29.1124	28.8545	29.4909	28.9313	29.2112	29.0248	29.1721	29.0751	29.1492	29.2692	28.8816	29.6098	28.8784	29.2389	28.8042	29.3925	29.5539	28.7183	28.891	29.277	28.8156	29.0062	28.9231	28.8394	29.2397	29.1237	28.9347	29.2672	29.0612	29.091	28.7561	28.7596				18	18	18	71.1	71.1	71.1	49.973	0	323.31	23900000000	684
24.7201	25.6639	NaN	NaN	24.4908	25.7334	24.8824	25.7295	NaN	25.3248	24.8257	NaN	25.654	27.0633	26.1441	24.6944	23.8701	25.6002	NaN	NaN	NaN	24.616	NaN	25.1949	NaN	NaN	25.2428	25.0426	NaN	25.3947	NaN	24.6636	NaN	NaN	NaN	NaN				2	2	2	15.9	15.9	15.9	21.012	0	35.034	1069200000	37
23.9119	23.2457	22.2925	23.1273	24.5407	24.2425	23.6516	22.0606	23.2381	22.9536	23.4357	23.328	NaN	23.3012	22.9025	25.6766	23.4918	NaN	23.0238	23.2835	24.023	23.8969	22.597	23.66	23.5544	23.7892	22.7653	23.6638	22.9018	23.0771	23.4833	23.7652	22.1422	23.4812	23.5222	23.7723				2	2	2	11.3	11.3	11.3	30.654	0	74.138	511610000	41
23.0554	21.9229	23.7687	25.9282	25.5129	25.3265	25.2179	NaN	29.9237	26.9739	27.316	26.8288	27.9815	29.6426	26.0509	27.9552	29.0585	NaN	25.8593	23.3048	28.4597	26.379	25.1119	NaN	29.2123	22.8667	28.1917	23.4945	23.48	28.1756	27.9238	21.5443	29.2274	25.7078	26.7362	25.6912				12	12	12	34.2	34.2	34.2	74.292	0	323.31	7986500000	180
29.9107	29.8643	29.8891	30.2059	30.0016	29.7618	29.6231	30.1378	29.47	30.4551	29.6362	30.1402	30.0423	29.7682	30.4379	29.2553	29.6844	29.6198	30.0552	30.498	29.8649	30.1181	30.3385	30.089	29.9513	30.2636	30.5083	29.9646	29.7917	30.0607	30.1369	30.6159	30.331	30.1836	29.9008	29.9403				31	31	31	52.7	52.7	52.7	95.337	0	323.31	51331000000	1535
26.2689	25.724	24.3431	26.3483	26.524	27.0723	28.2097	27.5845	27.0979	26.5777	27.4225	26.9346	26.7827	27.9976	26.8998	26.6499	26.8037	26.6413	25.6932	27.1299	26.771	25.9563	26.0638	25.802	26.5348	25.9855	27.8779	26.8454	26.2361	27.0464	26.9867	26.2279	27.5437	26.6843	27.4413	27.7286				13	13	13	28.2	28.2	28.2	72.932	0	323.31	5671900000	271
NaN	NaN	NaN	NaN	NaN	NaN	21.4749	NaN	23.3009	22.3947	22.8003	21.4838	NaN	22.807	22.6896	21.8322	23.8828	NaN	NaN	21.4876	NaN	NaN	NaN	NaN	NaN	NaN	23.2975	21.2252	NaN	23.6204	23.6766	NaN	24.5747	21.6123	25.0806	NaN				3	3	3	5.8	5.8	5.8	104.79	0	260.68	185140000	19
23.478	NaN	22.83	23.1686	NaN	24.622	24.5626	22.532	24.3869	21.0742	24.1666	22.64	22.6311	26.0201	21.9818	NaN	23.2003	NaN	NaN	23.2497	23.8545	NaN	21.7692	NaN	NaN	NaN	25.7209	NaN	20.8964	20.9811	23.2547	NaN	24.4263	21.6401	24.8096	23.4675				9	9	9	28.1	28.1	28.1	61.049	0	98.35	369150000	46
24.3331	22.7406	23.3448	23.6842	25.0639	24.1881	23.3806	24.6077	23.5777	22.7351	23.8973	23.8798	22.5096	23.6918	23.515	22.3782	22.6895	24.2584	24.0527	24.0678	NaN	23.5958	24.2403	24.0088	23.2322	23.1825	22.7068	23.6816	24.5724	22.9327	23.6126	24.7939	NaN	23.2062	22.9438	22.5634				3	3	3	11.7	11.7	11.7	36.598	0	65.283	520400000	72
NaN	21.8483	NaN	23.459	24.8721	NaN	NaN	NaN	27.0122	NaN	24.599	23.8616	NaN	NaN	NaN	23.9317	24.8411	NaN	19.8697	19.6336	22.2228	NaN	NaN	NaN	23.3585	NaN	NaN	20.2355	20.982	NaN	21.9375	NaN	NaN	23.3508	24.8736	29.1222				4	4	3	15.8	15.8	13.7	45.95	0	53.872	923490000	23
26.8033	26.5777	25.4363	27.0424	26.5958	26.4294	26.613	26.4947	26.0481	25.4957	26.3975	26.1742	25.7074	26.0095	25.2938	25.7705	25.2751	26.8028	26.6204	26.3617	26.3322	25.6638	26.5173	26.5423	26.2261	26.0844	25.8446	26.1251	27.2075	25.785	25.2034	26.5661	26.2	26.0807	26.6988	26.5902				5	5	5	36.6	36.6	36.6	19.595	0	237.5	4511300000	192
26.2748	26.3629	25.7931	26.6454	26.4377	26.3809	26.0124	25.7379	26.3431	25.9421	25.9339	26.119	26.1219	26.2192	25.3005	26.3174	26.257	25.7183	26.6893	25.6325	26.2978	26.6165	26.8009	22.8967	26.2742	27.1718	25.0526	26.9728	26.9276	25.7179	26.0542	26.4799	26.0246	26.3766	25.6221	25.96				9	9	9	48.2	48.2	48.2	36.294	0	309.35	3479300000	234
22.742	27.0683	NaN	29.2285	30.0769	24.8363	23.435	20.4486	29.3992	26.4415	25.6752	25.2046	22.2802	30.8121	25.8959	28.9024	26.2006	21.2866	NaN	26.5894	29.1706	24.7451	20.5932	28.6747	26.3629	NaN	27.8149	26.1053	NaN	28.5304	26.0746	23.0383	27.7638	28.1949	29.8154	25.3868				6	6	6	27.5	27.5	27.5	25.205	0	323.31	8606500000	207
22.3265	NaN	22.3344	22.2986	23.4554	25.185	22.7158	22.4873	24.4906	22.6012	NaN	22.0738	22.347	23.2226	23.4368	22.6732	NaN	25.3365	22.8038	25.1518	NaN	22.7523	22.1267	22.909	21.8882	22.669	25.0489	25.292	24.941	NaN	NaN	22.3904	NaN	23.3578	22.0188	NaN				5	3	3	19.3	11.7	11.7	40.057	0	323.31	466910000	38
NaN	NaN	NaN	NaN	NaN	NaN	NaN	NaN	NaN	NaN	27.7761	NaN	26.5159	NaN	NaN	NaN	27.2153	NaN	NaN	27.8489	29.1137	27.9519	NaN	NaN	27.704	NaN	NaN	NaN	NaN	NaN	NaN	NaN	NaN	NaN	29.0478	28.4339				6	4	3	43.2	32.3	22.9	30.112	0	217.29	2437100000	34
NaN	NaN	27.1733	NaN	NaN	26.4163	25.5175	25.338	NaN	NaN	25.1181	NaN	NaN	25.9676	27.476	NaN	21.4861	26.6665	NaN	NaN	NaN	NaN	26.5034	NaN	NaN	27.0812	NaN	26.6972	NaN	NaN	NaN	25.2247	25.3436	NaN	NaN	NaN				6	4	3	49.6	35.7	25.6	29.822	0	96.548	1399400000	38
21.5682	24.2808	24.7041	NaN	23.1206	NaN	NaN	NaN	NaN	23.1757	NaN	21.8351	21.4186	NaN	23.1243	22.6614	22.4139	NaN	24.5988	22.2601	22.8114	24.056	22.8887	23.6369	24.1741	24.6432	NaN	24.2545	21.349	22.8765	21.9825	23.6798	22.0276	24.2928	NaN	NaN				4	4	4	18.3	18.3	18.3	30.822	0	55.559	328870000	69
33.3078	32.7498	32.3908	32.7556	32.7762	32.6933	32.7348	33.7613	31.8536	32.7975	32.2326	32.5871	33.415	31.5364	32.3897	32.2008	31.6708	33.4315	32.9932	32.7576	31.7181	33.0807	33.1201	32.7944	32.7646	33.424	31.9385	32.7756	33.6272	32.0505	32.2232	33.1101	31.7364	32.5731	32.5489	32.7638				42	42	35	72.9	72.9	63.6	70.288	0	323.31	324900000000	5087
26.0504	26.4457	25.7642	25.8972	25.7327	26.0451	25.4188	26.0922	26.9276	26.8865	26.4569	26.1358	26.397	25.3195	25.7756	27.0626	27.5213	25.8136	25.742	24.9724	27.2262	25.9884	25.245	25.7593	25.2541	27.2389	27.2026	25.9035	26.1598	26.9755	26.8216	25.8114	27.7962	26.4409	25.592	25.9263				21	15	14	47.6	40.3	38.1	70.81	0	323.31	5117000000	240
27.4436	26.9513	26.5352	27.2822	27.2919	26.969	26.8344	27.1545	26.3827	27.0298	26.7985	27.1876	27.3527	26.7743	26.8126	26.6791	26.0499	27.6075	27.3849	26.3885	26.5931	26.7709	27.2039	27.14	26.9338	27.4529	26.3772	26.9524	27.3695	26.5452	26.4141	27.197	26.5605	27.2741	26.6252	27.1521				14	14	14	35.9	35.9	35.9	81.224	0	305.67	5393000000	356
25.2101	26.0551	26.0275	25.3761	24.0342	26.173	26.2836	25.7931	25.1185	25.6713	25.9509	26.0382	24.5571	25.9329	26.1601	25.4728	27.1847	25.5239	24.8334	25.7486	24.8995	26.016	25.1424	25.8603	24.6804	23.3204	26.1946	26.2644	24.3976	26.4795	26.4473	25.5225	25.862	25.1192	25.6356	24.9344				8	8	8	36.3	36.3	36.3	35.079	0	323.31	2530000000	156
23.2385	23.7884	24.6319	23.9173	24.0026	22.9861	23.4223	23.2171	24.1307	23.5507	23.0744	24.1707	23.61	23.4004	23.8442	22.9004	22.2186	24.2891	23.6223	23.3529	23.6318	23.8721	23.6085	23.5871	23.9338	24.1322	23.6603	23.5101	23.042	23.1108	23.9953	23.562	23.4831	23.8631	23.8865	25.4193				7	7	7	15.8	15.8	15.8	76.482	0	55.076	528670000	115
26.8234	27.0857	26.6596	26.709	26.5845	26.8501	27.005	26.6421	27.1047	26.6363	26.7257	26.5154	26.9525	26.8373	26.2903	27.0805	26.8662	27.0075	26.9745	26.3173	27.2306	27.1785	26.5086	26.3346	26.9311	27.6082	26.1664	26.9099	26.7037	26.5409	26.5918	26.9629	26.6075	27.2001	26.7604	26.7709				12	12	10	46.6	46.6	39	43.066	0	323.31	5013200000	284
29.6972	28.6983	27.0212	26.2011	29.2342	27.4205	28.6702	29.3368	29.5538	29.474	29.6903	26.3148	27.1681	28.865	28.5159	29.5382	28.842	29.0861	29.1884	28.062	28.8732	28.6343	29.4436	29.5068	29.045	29.0606	28.1517	29.5341	28.9378	28.6615	26.6925	29.3502	28.833	28.947	30.2247	28.4281				3	3	3	35.7	35.7	35.7	12.476	0	65.809	23135000000	378
21.5082	NaN	NaN	24.2572	NaN	23.8361	24.9675	24.0578	25.5071	23.0987	24.3705	NaN	24.5456	26.455	NaN	22.5985	23.405	22.4185	23.34	22.9002	NaN	NaN	NaN	NaN	NaN	23.3773	22.2228	23.5701	24.1526	NaN	21.759	NaN	23.0076	NaN	23.7152	21.6385				6	6	6	31.8	31.8	31.8	29.279	0	92.425	397550000	56
22.6014	NaN	24.5739	23.8766	NaN	23.1026	23.3224	23.7147	21.2818	21.8762	22.4494	21.4513	24.4655	21.4759	NaN	NaN	NaN	22.4277	21.7637	24.607	22.6943	21.4709	22.0448	22.9028	NaN	NaN	22.4212	22.5651	23.362	NaN	NaN	21.4447	NaN	21.8986	NaN	22.5592				6	6	6	15.9	15.9	15.9	61.377	0	50.04	224790000	49
26.6079	25.5331	25.7374	26.8417	26.2014	26.202	26.6875	27.1142	27.3923	26.4155	27.0151	26.6824	26.6483	27.7789	26.9497	26.8305	26.0621	26.9404	25.5503	26.2101	26.1299	26.9156	26.5628	23.3741	26.1829	25.9846	27.1059	26.7991	26.8899	26.7873	27.1096	26.3608	26.9079	26.8584	26.4776	26.7859				8	8	8	23	23	23	59.177	0	323.31	4186400000	149
28.8489	28.6392	27.3593	28.296	29.1719	27.5039	27.8604	28.6912	27.7993	28.7085	27.8459	28.501	28.6461	28.1478	28.2293	28.0799	26.8989	28.7984	28.9282	28.3225	27.8631	28.8892	28.8808	28.6167	28.8293	29.7565	28.0244	28.322	28.9737	28.1019	28.3796	29.2963	28.0515	29.2064	27.4829	28.6782				9	9	9	27.2	27.2	27.2	54.013	0	323.31	16849000000	445
26.1386	25.641	25.2628	27.5401	27.2776	26.7737	25.9138	26.556	NaN	26.2146	25.2808	26.0569	25.0257	25.9415	26.1411	24.78	NaN	27.3277	26.1544	24.9067	25.7427	26.7977	26.5347	25.6726	26.3893	26.3023	25.4681	NaN	26.2261	26.3075	25.9504	26.6756	NaN	26.351	NaN	24.7805				6	6	6	24.4	24.4	24.4	40.532	0	13.532	2706600000	64
24.3423	NaN	NaN	22.8494	NaN	24.447	23.8835	NaN	NaN	NaN	NaN	NaN	NaN	NaN	NaN	NaN	NaN	23.8702	NaN	22.4989	NaN	NaN	23.1728	22.9127	NaN	NaN	20.7951	NaN	NaN	NaN	NaN	NaN	NaN	NaN	NaN	NaN				5	5	5	18.5	18.5	18.5	50.513	0	11.601	118000000	23
26.7466	25.9465	26.4553	26.3384	24.5384	25.7934	25.8835	26.2396	25.4424	25.4878	25.3482	25.0239	25.6089	25.5188	25.9553	25.2053	24.9157	26.1727	26.33	25.8623	24.6302	25.3519	25.4966	26.5197	25.2182	24.3932	24.8042	25.9566	25.8003	25.1777	25.3221	24.6081	25.1338	25.5685	25.5148	24.1483				3	3	3	56.6	56.6	56.6	9.3959	0	82.738	2044100000	98
24.3395	23.8625	23.9898	24.1304	24.4257	26.465	25.7286	23.9128	25.2302	24.7377	25.2458	24.0359	25.2645	26.1446	27.2326	23.6404	25.1964	23.7484	NaN	24.9971	25.0918	24.6054	NaN	22.9422	24.3449	NaN	26.8876	25.5444	23.9788	27.0397	27.01	20.9567	25.5937	23.7556	23.4453	24.3817				18	18	17	29.3	29.3	28.4	122.02	0	106.96	1636500000	124
28.479	27.9256	28.1612	28.0913	27.6291	28.6033	28.137	29.0539	28.0929	28.0321	27.7731	28.4599	28.7023	28.1413	28.1336	27.8842	27.7742	28.6339	28.2221	28.7149	28.5225	27.7484	28.7282	28.3365	27.9697	27.4584	27.7585	28.0732	28.5062	28.0364	28.1137	28.5448	28.0989	28.3993	28.2647	26.603				13	13	13	51.1	51.1	51.1	36.573	0	323.31	12970000000	406
24.4522	23.6946	24.727	25.2281	25.0535	26.2013	25.1551	25.0067	25.3376	25.1623	23.0444	24.1793	24.5986	25.8947	25.3127	24.7697	24.1674	24.9321	24.343	25.5689	24.5035	24.3536	23.4679	23.9482	24.555	24.1594	25.6245	24.9572	24.6194	23.7787	24.1286	25.5098	25.5626	24.0479	25.2778	25.1858				10	10	10	40.3	40.3	40.3	44.681	0	164.61	1278700000	190
32.3668	31.9454	31.4716	31.9031	32.3691	31.9193	31.3463	32.2952	31.8138	32.5531	31.829	32.9996	31.6409	31.4298	31.5016	31.7219	30.9855	31.9806	32.3332	32.0105	31.6557	32.1214	32.724	31.6585	31.9596	32.5945	32.1362	31.5313	32.415	31.7922	32.233	32.3886	31.8014	32.4061	32.157	32.2499				34	34	5	68.4	68.4	9.4	57.936	0	323.31	208480000000	3609
NaN	23.9908	24.7452	23.864	24.1384	23.5539	NaN	24.7533	23.2125	24.3189	NaN	24.6655	NaN	NaN	23.8215	23.5477	23.611	24.1793	24.5429	NaN	22.6685	24.5064	24.8731	NaN	23.9834	24.5299	23.937	22.6613	24.1018	23.6936	23.9499	24.0144	23.7162	24.6398	NaN	NaN				31	2	2	62.9	4	4	58.061	0	80.753	566960000	44
29.5515	28.8526	28.7747	29.917	29.6596	30.3027	31.0785	29.7922	30.3932	29.6139	30.6635	29.6962	30.2899	31.0345	29.9295	29.8671	30.1591	30.0113	29.0188	30.4823	30.4571	29.6718	29.3108	28.9229	29.7924	28.8887	31.0034	29.8645	29.4168	30.2133	30.2987	29.0721	30.4745	29.8912	30.8631	30.4762				27	27	25	39.2	39.2	37.5	92.468	0	323.31	47236000000	1145
NaN	23.1456	NaN	23.0511	NaN	NaN	NaN	NaN	NaN	NaN	NaN	NaN	NaN	NaN	NaN	21.0281	NaN	23.0518	23.195	NaN	21.7355	21.884	NaN	22.0017	22.3811	NaN	NaN	NaN	NaN	NaN	NaN	NaN	NaN	NaN	NaN	NaN				6	4	4	36.1	24.5	24.5	22.764	0	5.6058	100000000	12
26.3486	27.3221	27.4766	26.9919	27.3314	26.9315	26.4316	26.2772	26.5795	26.6239	25.8845	26.4377	26.5469	25.9287	26.0299	26.258	27.39	25.4929	26.933	25.2509	22.003	25.6136	26.796	27.6653	27.1589	26.5152	26.6873	27.9497	26.3003	26.3618	26.326	27.0392	25.2262	26.7238	25.8571	26.5447				5	5	5	19	19	19	23.656	0	323.31	5361600000	172
22.0182	NaN	22.0164	21.397	NaN	NaN	NaN	22.3998	NaN	NaN	NaN	NaN	NaN	NaN	NaN	NaN	23.4726	22.0139	21.565	21.6269	NaN	22.061	22.3229	21.6893	21.6724	NaN	21.5733	NaN	21.6128	21.4361	21.6005	NaN	22.1727	NaN	21.3982	21.9271				5	5	5	5.9	5.9	5.9	117.97	0	8.2015	113910000	31
24.7231	25.0276	24.8309	25.3173	24.6556	25.5519	24.5578	23.9035	27.1508	24.9425	26.1413	26.1563	20.9516	24.5206	24.8853	24.8444	25.6671	24.1003	24.2585	24.5814	24.7421	25.0449	24.4751	24.9208	25.1476	NaN	26.233	24.5449	24.3564	22.1746	25.7651	25.0071	25.6561	24.9675	24.1032	28.3772				11	11	11	21.2	21.2	21.2	78.457	0	259.01	1560500000	187
27.7827	27.6747	26.7554	27.4661	27.2831	26.5274	27.1792	27.2723	26.8061	26.7409	26.9925	26.5965	26.7159	26.2503	26.2864	26.8403	25.8318	27.6567	27.4143	26.4484	26.9408	26.8939	27.2961	27.3289	25.9198	26.2211	25.8374	27.0149	27.5363	26.436	26.0586	26.8434	26.615	26.9114	26.0695	26.4553				4	4	4	57	57	57	10.192	0	176.97	5135700000	144
26.3822	26.0547	26.8541	27.0603	26.0301	26.3921	26.5911	25.8925	25.1782	26.7981	25.7972	27.0822	25.9253	25.9696	27.7844	25.0714	25.414	25.2045	26.8287	27.1437	26.281	27.0835	26.9147	26.3492	26.0921	25.3966	27.3842	27.1418	26.0412	27.2802	27.5231	26.9007	26.1024	26.7429	25.7507	23.724				10	10	10	37.7	37.7	37.7	64.132	0	323.31	5282800000	320
27.3886	27.2877	27.3533	27.8956	27.9792	26.9726	27.1368	27.5212	27.2352	27.5614	26.9719	27.8367	27.2978	25.728	27.358	26.4554	26.314	27.4296	27.7789	27.552	27.3473	27.8689	28.099	27.3552	27.32	27.9832	27.4317	27.2822	27.4564	27.1783	27.5714	28.0964	27.0487	27.6042	27.6258	28.3335				11	11	11	26.7	26.7	26.7	57.136	0	323.31	7478400000	334
23.1904	NaN	NaN	NaN	NaN	27.3966	22.1755	27.9932	NaN	20.4086	19.6875	NaN	23.5672	NaN	19.8848	NaN	NaN	25.2231	NaN	22.1784	NaN	NaN	NaN	22.8528	NaN	NaN	NaN	20.7904	26.2951	18.7061	NaN	21.6189	NaN	21.2504	NaN	NaN				12	12	12	39.7	39.7	39.7	45.326	0	131.59	723500000	47
NaN	NaN	NaN	NaN	NaN	NaN	NaN	26.0889	NaN	NaN	NaN	NaN	20.3582	NaN	23.5524	NaN	25.739	NaN	23.1134	NaN	NaN	NaN	23.6169	24.4705	NaN	NaN	NaN	NaN	NaN	NaN	21.4743	NaN	NaN	NaN	NaN	NaN				14	14	11	30.7	30.7	25.6	81.744	0	151.97	249280000	33
25.1711	24.1837	NaN	24.1028	NaN	24.2907	24.471	25.0756	23.7695	24.2927	24.61	23.8789	24.6247	23.9751	24.8904	NaN	NaN	24.7233	24.4211	24.7381	NaN	NaN	23.4682	25.749	NaN	NaN	24.5927	24.5129	23.9227	24.3878	24.422	24.3518	23.8679	23.5074	25.3026	NaN				2	2	2	25.2	25.2	25.2	13.53	0	141.96	726280000	45
23.2388	24.0839	25.8413	24.254	23.0576	24.5011	22.3043	NaN	22.4187	21.981	22.5159	NaN	21.6665	24.9567	22.3604	NaN	23.5707	23.5252	21.9523	NaN	22.6865	NaN	NaN	21.786	23.0331	NaN	NaN	26.4246	NaN	23.0361	22.587	NaN	23.266	23.0581	21.0336	NaN				4	4	4	16.1	16.1	16.1	48.669	0	159.08	416320000	53
NaN	23.3955	NaN	24.8293	23.2055	25.9592	NaN	NaN	25.8425	24.2292	NaN	24.9171	22.6148	25.4818	25.8489	23.6279	25.6623	25.0181	NaN	NaN	NaN	23.0126	NaN	NaN	23.6877	NaN	24.0354	24.0476	22.0697	23.0928	23.5837	NaN	22.8205	22.7661	24.219	24.6724				5	5	5	43.2	43.2	43.2	14.719	0	247.61	804240000	75
24.1219	22.8644	NaN	26.025	NaN	25.7604	27.3138	24.4691	27.7914	24.2424	25.3594	24.7234	25.0595	25.2273	NaN	24.1528	23.8578	25.3229	23.8446	25.0114	24.5608	24.397	24.6323	24.5943	23.7711	23.6166	25.4193	23.1631	25.9595	NaN	23.9605	24.3883	23.6716	24.0897	25.3508	24.4679				7	7	7	29.5	29.5	29.5	42.064	0	323.31	1276000000	87
24.6633	24.3558	24.4853	23.9696	22.7503	24.3137	24.6022	25.9409	24.4434	24.8487	24.6458	24.298	24.4028	24.4918	23.4462	22.9476	24.6372	23.5735	24.4207	24.564	24.2136	24.7615	24.8322	24.4277	24.5222	24.5231	24.6012	24.7129	24.7946	24.9646	24.9638	24.8378	24.4428	24.5688	23.9384	23.237				5	5	5	35.1	35.1	35.1	35.853	0	147.39	1021900000	107
24.6044	23.5156	22.8904	23.5855	24.1004	26.323	26.2811	23.4269	28.2126	24.203	26.4055	25.1116	24.5644	28.4593	23.0354	25.14	25.5768	24.8768	NaN	22.295	25.693	24.1118	22.4602	23.5537	24.7304	22.0618	26.628	18.9091	20.8246	22.9865	24.5815	23.3399	24.9882	23.5083	27.4361	25.7695				18	18	18	30.7	30.7	30.7	109.54	0	323.31	1777500000	179
28.5994	28.0759	28.9359	28.1173	27.8029	26.7655	27.5529	27.5358	27.1342	28.2831	27.276	27.6801	27.9463	27.6244	29.303	26.7314	25.6323	27.9713	29.0212	28.3689	27.4272	28.2343	28.1389	28.2234	27.7398	28.5405	26.8159	28.787	28.3797	27.3357	27.9376	28.4122	27.0311	28.7367	26.3755	26.9162				4	4	3	26.6	26.6	22.4	21.429	0	15.096	10279000000	84
22.7641	NaN	22.3967	NaN	NaN	NaN	NaN	21.9265	22.0392	22.4639	22.2165	20.4721	21.7911	22.6276	23.2396	NaN	22.2113	NaN	NaN	23.1953	NaN	NaN	22.6934	NaN	NaN	23.3778	23.1044	21.8946	22.6988	22.5083	22.9291	22.5526	22.5398	23.0666	NaN	22.3897				4	4	2	16.8	16.8	10	55.755	0	16.834	144990000	33
25.1307	25.6611	23.5053	25.8174	24.1013	24.1204	25.3743	23.1089	24.1918	24.0245	24.6753	23.348	24.5019	24.7158	22.9645	26.2018	26.5104	24.7273	24.8013	23.63	24.9123	23.6816	25.1766	25.2312	23.4482	25.1077	NaN	23.8302	23.1696	24.046	22.8226	24.6744	23.7939	23.6762	22.858	25.2091				7	7	7	33.6	33.6	33.6	44.881	0	221.09	1235600000	120
28.1517	28.609	28.6384	28.4658	27.8533	26.9858	27.1217	27.6193	26.4954	28.5129	27.27	28.4902	27.0417	26.3143	27.9778	26.8984	26.1831	27.3498	28.7871	27.3604	26.7205	27.804	28.3468	27.8119	28.143	29.2831	27.4294	27.6776	27.9378	27.9155	27.8864	28.8904	27.2214	28.1763	26.8638	27.5217				17	11	11	35.7	26.5	26.5	69.412	0	323.31	10450000000	274
24.928	22.5444	23.5925	24.9027	24.6197	22.6866	NaN	23.2274	NaN	22.8453	23.0985	23.7782	24.2277	NaN	NaN	24.2721	22.3091	24.8683	23.9767	22.8018	24.0595	24.3853	24.5803	22.1231	23.9062	NaN	22.7199	23.4919	23.7246	21.138	22.7426	23.813	23.2577	23.5534	23.263	23.6073				6	6	6	37	37	37	26.182	0	15.242	471390000	45
NaN	NaN	24.2259	22.1276	24.1969	NaN	NaN	NaN	NaN	NaN	NaN	NaN	NaN	NaN	NaN	NaN	NaN	NaN	24.3787	21.2765	NaN	23.1021	NaN	22.5515	NaN	NaN	NaN	23.4089	NaN	NaN	NaN	23.3848	NaN	NaN	NaN	NaN				2	2	2	4.1	4.1	4.1	61.128	0.00049975	3.4013	104380000	12
24.7366	24.987	26.3689	25.1634	24.6215	25.2737	24.9447	25.82	24.4278	25.4921	25.0395	25.2077	26.615	23.4628	26.8526	25.9577	24.765	25.0458	25.54	26.4123	25.0479	26.0489	25.5565	25.5512	26.1978	26.7489	24.6233	25.6207	25.6598	25.0946	25.5652	26.0189	25.1834	25.9851	24.5409	25.2586				13	13	13	21	21	21	94.492	0	323.31	1714100000	101
26.6095	23.8608	23.5301	25.0333	NaN	24.5305	26.1589	23.9681	24.477	23.9747	23.7344	23.7568	24.7306	24.6008	22.0671	23.3655	NaN	24.6568	23.4815	23.6375	23.442	22.8782	22.2844	NaN	22.6684	NaN	22.7746	23.1775	24.2084	NaN	22.462	23.4308	NaN	22.7914	24.4657	24.8363				6	6	6	12.6	12.6	12.6	59.988	0	31.57	622230000	54
NaN	NaN	20.4923	23.3298	NaN	NaN	NaN	NaN	23.1393	NaN	22.3209	NaN	22.289	22.9331	NaN	22.7599	NaN	NaN	NaN	NaN	22.2716	NaN	NaN	23.2577	21.1774	NaN	22.062	NaN	NaN	NaN	NaN	21.8281	NaN	22.4508	22.1827	22.5548				5	5	5	16.5	16.5	16.5	59.687	0.00026831	4.5971	105740000	21
26.8506	27.3126	27.1523	26.8283	26.3789	27.1929	26.4434	27.0208	26.9101	27.1974	26.6473	26.9142	27.1879	26.3583	27.4652	26.9691	26.5479	26.438	27.1932	27.9618	26.9477	27.1182	27.2383	27.6574	26.7561	26.8313	27.5079	27.5954	26.8737	27.0862	27.0951	27.115	26.894	26.9574	27.5179	26.9218				5	5	5	22.2	22.2	22.2	31.324	0	323.31	5488500000	227
NaN	NaN	22.0573	NaN	NaN	NaN	NaN	27.4703	NaN	NaN	NaN	NaN	18.5954	19.2	22.1431	18.7959	27.9965	19.5943	21.0666	21.6546	NaN	NaN	23.9533	26.1004	19.2366	19.5775	NaN	NaN	19.6559	NaN	20.5771	NaN	21.3119	NaN	22.3271	NaN				29	29	29	17.9	17.9	17.9	331.77	0	323.31	1117500000	84
23.3594	23.5607	23.3688	23.9835	23.7397	22.8561	NaN	23.4666	23.1332	23.7809	23.413	23.1061	22.9195	22.6134	23.5687	24.0535	25.0863	21.5373	22.8003	24.2273	24.2737	23.6695	23.426	23.993	24.107	24.3675	22.7866	23.9201	23.0334	22.4206	22.9181	24.2102	22.3497	22.8454	23.3669	22.9699				4	4	4	30.7	30.7	30.7	29.247	0	86.279	676310000	116
29.7334	25.8686	NaN	26.9716	27.7864	24.7687	NaN	18.6731	25.6075	25.3578	26.7393	24.3124	NaN	28.106	24.4282	28.1517	22.2473	21.993	NaN	23.7737	25.8392	23.0971	NaN	27.7166	24.5752	NaN	25.5292	23.1371	26.4415	26.2478	23.7712	25.2161	26.5286	25.8303	30.5331	25.4112				28	28	28	62.7	62.7	62.7	74.804	0	323.31	4109000000	182
30.087	28.9802	28.4741	29.3001	29.3153	23.2134	30.0215	29.172	29.1717	28.6461	29.1758	28.8147	28.2599	29.0337	27.5254	28.8812	27.5051	29.7044	28.6399	28.389	28.4765	28.852	28.9351	28.8853	28.935	29.1243	27.7188	28.3598	30.5618	28.0342	28.2736	29.0322	28.3108	29.1147	28.6795	29.6595				4	4	4	8.4	8.4	8.4	81.537	0	323.31	20023000000	144
NaN	23.1607	22.6874	NaN	NaN	23.5297	23.0562	22.5667	24.1569	NaN	23.1367	NaN	23.3518	23.2935	22.1641	NaN	NaN	NaN	NaN	22.1296	23.534	NaN	22.352	NaN	22.089	22.53	22.3083	23.2042	22.7919	NaN	22.3282	NaN	NaN	22.9272	NaN	NaN				4	4	4	33.8	33.8	33.8	25.918	0.00025947	3.9842	171880000	22
27.1147	28.4886	27.8886	26.6278	27.4767	26.8009	26.3739	27.9942	26.9477	27.7218	27.6144	27.7287	27.7005	26.5985	28.2578	27.8943	28.3541	26.7768	27.3869	28.2542	29.2815	28.2888	27.2634	28.7014	27.8043	26.6172	27.2	28.5399	27.7128	27.8382	27.6067	27.6143	26.472	25.8625	26.552	25.127				9	3	3	55.9	21.7	21.7	15.144	0	323.31	9973200000	216
NaN	NaN	NaN	NaN	NaN	NaN	NaN	NaN	NaN	NaN	NaN	20.9372	NaN	NaN	21.0742	NaN	NaN	NaN	NaN	NaN	NaN	NaN	NaN	NaN	NaN	NaN	21.1717	NaN	NaN	21.1452	NaN	NaN	NaN	NaN	NaN	NaN				4	4	4	3.3	3.3	3.3	200.72	0.00677	2.0433	29268000	6
26.0506	23.8832	NaN	24.3845	24.6146	NaN	NaN	NaN	NaN	24.2847	NaN	NaN	NaN	NaN	22.4833	NaN	NaN	21.8888	24.2862	NaN	NaN	25.5095	25.0732	NaN	24.1451	25.4887	NaN	24.3943	25.3992	NaN	NaN	24.7735	NaN	23.9753	NaN	NaN				3	3	3	12	12	12	40.321	0	13.551	452780000	24
29.5159	29.3645	28.7565	29.3345	29.137	29.8796	29.9261	29.6822	28.7583	28.6495	28.6377	29.0106	30.01	29.1167	28.6077	28.4307	28.2188	30.1159	29.2142	28.9564	28.5048	29.1576	29.1525	29.3489	28.752	28.6001	28.1899	29.1421	28.6045	28.4544	28.7131	29.2097	28.5429	28.7949	28.7162	29.2973				15	15	13	69.7	69.7	59.2	30.375	0	323.31	23539000000	526
22.819	NaN	NaN	NaN	NaN	24.0402	NaN	NaN	21.1458	NaN	23.1428	NaN	22.0164	24.0331	23.3008	NaN	25.1939	NaN	NaN	NaN	NaN	NaN	NaN	NaN	NaN	NaN	22.3275	24.6272	NaN	23.4234	23.0564	NaN	22.8302	23.3943	NaN	NaN				11	11	11	11.7	11.7	11.7	166.48	0	54.321	227440000	38
22.9703	23.6706	23.6862	22.5228	23.4882	23.4986	22.9919	24.4275	23.4103	23.7273	24.7061	23.5272	24.4987	NaN	25.1491	23.2967	24.1067	23.7788	21.9202	23.4757	24.1607	24.1936	NaN	23.0408	23.4325	23.4202	22.9238	24.2172	22.044	24.6985	24.3384	23.3932	23.8304	23.9175	24.2082	NaN				5	5	5	21.6	21.6	21.6	44.297	0	323.31	556880000	60
23.9276	24.3584	24.5963	24.7882	24.8291	23.8008	24.1399	24.129	23.5943	24.4065	23.9353	24.6148	23.5702	24.2132	24.4538	23.1549	23.1387	24.3999	24.6276	23.914	24.3324	24.769	24.5845	23.7506	24.2488	24.3286	23.4497	24.2775	24.5999	23.877	23.8595	24.5948	23.7336	23.9923	24.1813	24.5411				2	2	2	12.6	12.6	12.6	36.688	0	103.81	774970000	98
24.8854	24.4651	23.406	25.2847	24.6047	23.8715	23.691	22.815	24.9652	24.4554	24.9631	24.2912	24.2629	25.3105	23.3101	24.2194	24.3117	23.8346	24.3345	22.6283	24.5082	24.149	24.6047	24.1598	24.1707	23.5777	24.4954	23.8953	24.5029	23.2177	23.8877	24.4266	23.3557	24.0507	24.3254	23.9645				5	5	5	10.5	10.5	10.5	76.074	0	124.17	910730000	130
21.6739	22.4556	21.989	22.0705	22.232	22.81	22.3153	22.2884	22.8054	NaN	21.8148	NaN	23.1314	22.9257	22.5385	23.0109	22.5092	22.3615	21.8593	22.3872	22.0844	21.9727	21.9066	21.7253	22.321	22.3354	22.2164	22.7911	21.5061	NaN	22.0453	21.1555	22.1886	NaN	22.0565	NaN				4	4	4	10.2	10.2	10.2	79.246	0	48.658	186760000	50
24.2573	23.9237	24.7477	24.3422	24.5892	23.4779	23.5443	24.2534	24.3596	24.6622	23.7999	24.4675	24.5008	23.8182	24.7106	23.8593	22.8282	24.5693	24.8769	23.9	23.5757	23.4312	24.4684	24.3309	24.5352	25.1882	23.9788	24.8213	24.6569	24.1312	24.4425	24.9153	23.7315	24.4649	23.5055	24.6669				5	5	4	12.6	12.6	10.7	59.024	0	12.178	799400000	108
NaN	21.233	NaN	NaN	NaN	NaN	NaN	NaN	NaN	NaN	NaN	NaN	19.8007	NaN	NaN	NaN	NaN	NaN	21.464	NaN	NaN	NaN	NaN	21.4828	NaN	NaN	NaN	NaN	20.6888	19.992	NaN	21.222	NaN	NaN	NaN	NaN				3	3	2	8.2	8.2	6.1	42.864	0.00027739	5.3417	28771000	9
28.9679	28.4358	29.0179	28.4818	27.9611	27.9418	28.9613	29.3554	27.4898	29.5444	29.0286	29.6712	27.2382	28.9148	28.9749	28.4332	27.2659	28.3271	27.8584	27.5462	27.3442	29.5643	29.1234	28.2861	27.9088	27.9174	29.6058	27.81	29.0381	30.0258	30.0182	28.4132	28.1426	27.1799	27.0266	27.7952				3	3	3	16.4	16.4	16.4	22.58	0	172.52	17323000000	67
27.9039	28.7065	28.4525	28.5962	28.2854	27.8067	28.4734	28.2127	27.2064	29.2988	29.0534	29.1966	28.2219	27.3189	31.2616	28.6416	27.1357	27.7207	28.3396	30.1747	28.391	29.5779	28.0889	28.6674	28.8136	27.8004	29.5487	30.7589	27.9166	29.9024	30.4974	28.2925	29.0329	29.5698	27.708	26.1738				5	5	2	21.7	21.7	9	22.35	0	22.997	23369000000	110
27.586	NaN	NaN	NaN	NaN	26.9554	NaN	29.1555	26.8495	29.5025	28.3615	29.6035	27.1585	28.7366	29.0896	28.0142	27.0379	NaN	NaN	29.5881	NaN	29.1236	28.0389	27.5856	28.9041	28.8789	29.463	NaN	28.7453	29.3615	30.0322	28.1744	28.6267	29.2017	27.0472	26.5901				5	2	2	21.1	8	8	21.364	0	33.584	14052000000	27
21.9733	23.4179	22.5644	NaN	22.5491	24.7649	24.9392	23.277	23.8194	22.8055	23.4648	23.1128	24.5118	22.469	23.1995	24.1286	23.016	22.5824	22.0551	23.3609	NaN	22.7901	21.6513	22.4536	22.7254	22.8199	25.216	22.8973	22.4892	23.939	23.4413	21.9538	23.2176	NaN	23.4558	24.1361				8	8	8	21.7	21.7	21.7	76.689	0	93.544	449830000	81
NaN	NaN	NaN	NaN	NaN	22.0841	NaN	NaN	20.9524	20.8539	NaN	NaN	NaN	NaN	NaN	22.0559	NaN	NaN	NaN	NaN	22.6426	23.3038	NaN	NaN	22.56	NaN	20.0386	22.6043	NaN	22.98	21.2385	NaN	23.0828	NaN	22.489	NaN				3	3	3	13.1	13.1	13.1	45.673	0.00026144	4.1	90799000	13
22.5783	NaN	22.8521	NaN	NaN	NaN	NaN	NaN	NaN	NaN	NaN	NaN	NaN	21.2402	22.371	NaN	NaN	NaN	NaN	NaN	NaN	NaN	21.6218	22.7539	NaN	NaN	NaN	22.1602	21.4212	NaN	NaN	22.4578	NaN	NaN	NaN	NaN				2	2	2	17.4	17.4	17.4	21.646	0	5.4618	44690000	12
22.3206	22.6399	26.6134	23.7608	24.7712	25.4242	25.8056	25.5427	24.4999	24.8562	25.1257	25.0909	25.1469	25.7835	25.7825	24.9406	24.637	24.5639	24.112	26.2476	24.989	24.2175	24.5326	23.2585	25.0725	23.7879	25.7925	24.6018	24.3651	24.9265	24.6977	24.0293	25.2986	25.4334	24.7271	24.3056				14	14	8	22.3	22.3	12.3	109.73	0	323.31	1334500000	132
NaN	NaN	NaN	NaN	NaN	21.7358	NaN	NaN	21.1243	NaN	21.4955	NaN	21.4754	21.696	22.1815	NaN	NaN	NaN	NaN	20.4337	NaN	NaN	NaN	NaN	NaN	NaN	21.5162	NaN	NaN	20.7549	21.6077	20.0575	21.0907	NaN	20.8515	NaN				2	2	2	7.3	7.3	7.3	46.09	0.00025927	3.9698	40034000	21
22.6135	26.1729	26.1045	24.1506	25.1629	23.8635	NaN	24.8322	22.1648	25.3687	23.5359	23.374	25.1744	24.0447	26.2475	23.5973	24.8215	24.125	26.3143	25.7609	24.8542	24.8447	24.3742	24.6444	25.3496	25.9459	25.0184	25.5094	23.11	25.7404	24.8074	25.9788	24.5733	24.8817	22.8829	24.0759				24	24	24	29.6	29.6	29.6	147.87	0	280.92	1362000000	286
24.3322	24.889	24.1017	25.0936	25.7905	24.893	25.8639	24.6414	25.7463	24.547	25.3412	24.7793	24.4447	24.9097	23.3287	25.2593	25.6655	24.4504	23.4334	24.0449	24.7592	25.1117	24.7049	24.5982	25.3951	25.2633	23.6199	24.4581	25.0349	23.6806	24.3878	25.1929	23.3159	24.9905	25.3131	26.283				4	4	4	14.8	14.8	14.8	46.374	0	314.6	1219400000	95
27.6446	27.0822	25.7889	27.3027	27.073	26.6047	26.58	27.0021	25.8277	27.1344	26.3119	26.8388	25.8601	26.1232	26.4526	25.2813	25.7321	26.8534	26.7351	26.5953	26.3118	27.5305	27.332	27.4792	27.2209	26.8771	25.9717	26.4906	26.8434	25.9179	26.0255	27.0424	25.6292	27.0266	27.0012	27.3605				4	4	4	24.2	24.2	24.2	17.302	0	60.428	4347300000	190
24.73	25.141	23.5659	25.7392	24.9727	24.0239	25.285	24.5972	24.2985	24.4641	24.4081	24.428	25.0194	24.4733	23.9822	23.8978	23.9801	25.5887	25.0103	24.5099	24.4291	24.1057	24.9832	24.8476	24.9233	24.872	24.3801	24.1131	24.4333	24.1735	24.3135	25.0741	24.4212	24.6448	24.3088	25.9563				4	4	3	33.3	33.3	27.7	31.947	0	185.26	2206100000	269
24.6401	NaN	NaN	23.9326	24.0547	23.2751	NaN	NaN	24.6248	23.3554	22.8552	23.5476	23.4085	23.2924	NaN	NaN	22.4219	NaN	23.3215	21.9495	25.0179	NaN	23.0741	23.1013	23.6288	NaN	21.9611	23.1762	24.0021	NaN	22.0157	23.3199	22.3827	22.2597	24.1399	NaN				5	5	5	18.7	18.7	18.7	46.564	0	84.421	328080000	40
26.5623	26.5581	26.6907	26.0634	26.3675	25.7736	25.3932	25.9327	25.3682	25.3093	25.4799	26.0687	25.5903	25.1907	25.7458	26.1081	25.3213	26.6488	26.0318	25.2457	25.2654	26.726	26.1558	26.2803	25.9142	26.3591	24.9348	25.7991	26.1873	25.2295	25.2128	26.1215	25.6943	25.9792	24.6817	26.3085				9	9	9	36.6	36.6	36.6	46.247	0	321.91	2492400000	203
NaN	NaN	NaN	NaN	21.3423	NaN	NaN	NaN	26.1282	19.8365	24.3365	23.8858	NaN	20.5247	NaN	NaN	22.0789	NaN	NaN	19.3446	NaN	NaN	NaN	NaN	21.7572	NaN	24.2057	20.4514	NaN	NaN	21.7987	22.264	20.7062	NaN	21.4433	26.8761				6	6	6	25.9	25.9	25.9	53.899	0	203.23	253800000	35
NaN	21.9056	NaN	NaN	NaN	NaN	NaN	22.2532	NaN	21.8225	NaN	22.0315	NaN	22.0035	21.9125	NaN	NaN	21.2283	NaN	21.5617	NaN	NaN	21.4029	NaN	21.5137	22.2502	NaN	NaN	NaN	21.3467	NaN	NaN	NaN	NaN	NaN	NaN				6	2	2	14.4	4.8	4.8	76.749	0.0043094	2.3988	48894000	15
24.0654	NaN	24.894	NaN	NaN	NaN	NaN	NaN	NaN	NaN	NaN	25.3082	23.8454	NaN	25.2249	23.7056	NaN	24.8825	NaN	25.5206	NaN	25.7709	23.4874	23.7238	23.8176	23.8549	25.2584	24.2509	NaN	NaN	22.6152	22.2394	26.3829	24.3273	NaN	NaN				4	4	4	7.6	7.6	7.6	84.936	0	8.2997	631790000	18
NaN	NaN	23.2687	NaN	NaN	NaN	NaN	NaN	NaN	NaN	NaN	NaN	NaN	NaN	NaN	NaN	NaN	NaN	NaN	NaN	NaN	NaN	NaN	NaN	NaN	NaN	NaN	NaN	NaN	NaN	NaN	NaN	NaN	NaN	NaN	NaN				2	2	2	8.4	8.4	8.4	47.504	0	5.6214	9194800	3
22.4706	21.6208	21.8848	21.5798	NaN	21.3637	21.6735	21.3414	20.2766	20.7362	21.3132	21.0721	21.9607	NaN	21.1828	NaN	NaN	NaN	21.5815	21.2101	NaN	NaN	NaN	22.0675	NaN	NaN	NaN	20.6374	22.3373	21.3413	21.1608	22.0129	21.2466	21.7968	NaN	21.7267				2	2	2	29.9	29.9	29.9	16.402	0	55.043	98660000	20
25.6114	25.5071	25.601	24.871	25.6872	25.9604	25.5515	25.9147	25.9881	25.498	26.1956	25.6258	25.8717	25.5193	25.2063	27.1086	26.8831	25.7263	25.1891	25.3201	26.8612	26.0593	25.6053	26.0832	25.6965	26.1626	25.9897	25.648	26.1604	25.7303	25.364	25.7505	26.0106	25.8621	26.063	25.664				16	16	3	40.7	40.7	7.6	79.994	0	323.31	2662500000	308
25.8085	25.1138	28.1385	25.8404	23.0847	27.9352	25.6191	25.5914	25.9842	23.5649	27.3601	NaN	24.8154	26.7484	24.1753	26.205	26.3166	27.3529	21.8568	21.9484	25.1255	23.1205	22.375	25.6733	25.3522	24.6961	25.4526	24.4284	24.3368	26.8741	21.0897	NaN	NaN	24.1891	NaN	23.1572				14	12	12	34	30.2	30.2	53.535	0	323.31	2415500000	151
26.0788	NaN	NaN	24.3803	23.6484	NaN	23.3565	25.7606	22.9322	23.6417	23.8399	23.8348	23.6373	NaN	22.8328	24.5987	23.3519	24.9185	NaN	NaN	NaN	23.936	NaN	25.1327	NaN	24.1969	NaN	23.0722	25.0906	NaN	24.9911	23.1833	23.5727	22.6808	NaN	22.8043				3	2	2	14.5	10.7	10.7	38.224	0.00097871	3.0973	559020000	29
22.7736	23.6076	22.5117	22.7152	23.4654	22.9818	22.4757	22.8531	22.1596	23.4783	22.7832	24.0379	21.7221	21.5402	22.9442	23.9586	24.5884	22.4243	22.6362	22.948	23.4653	23.3339	23.3986	23.4847	22.8479	22.9352	23.3885	22.3378	22.8859	23.3592	22.7165	23.1555	23.1685	23.7244	22.9863	23.7544				6	6	6	14.6	14.6	14.6	66.69	0	143.7	402510000	108
NaN	23.7066	23.1598	23.7683	24.468	24.5811	NaN	23.1106	25.2485	NaN	24.4399	22.9407	NaN	24.7619	23.092	23.2914	24.4444	23.8615	23.636	22.7828	24.3634	23.2218	23.0615	22.38	24.0169	22.9211	24.1227	22.5016	22.7015	NaN	23.6085	NaN	23.8415	NaN	23.826	23.3844				3	3	3	10.1	10.1	10.1	67.541	0	117.74	470030000	41
27.3683	27.8381	28.8615	28.6612	27.9759	27.9506	28.239	27.867	27.3148	28.4524	27.7589	28.8366	27.9402	28.3304	28.8162	27.6398	27.3524	27.6601	28.0032	28.9711	27.9267	28.2496	28.3735	28.2511	28.2752	27.5758	28.4717	28.6551	28.2318	28.7135	28.73	28.5412	28.1006	28.5592	27.6961	28.0061				17	17	12	33.9	33.9	24.4	69.147	0	323.31	13602000000	477
27.7084	27.8688	28.218	27.5597	28.6023	27.478	27.2243	27.9355	27.3075	27.908	27.2645	28.108	27.6952	27.4555	27.8898	27.7005	26.9549	28.0506	27.9134	28.0285	27.5273	27.8035	27.8029	27.9714	27.9693	28.8535	27.321	27.9238	27.765	27.5971	27.7077	28.0659	27.3005	27.8998	27.245	27.9098				20	20	18	43.2	43.2	39.6	85.018	0	323.31	11072000000	636
27.6651	24.7253	25.0812	25.4222	26.1496	23.0166	20.3479	27.0327	25.0017	25.0359	25.1225	25.8766	21.6803	NaN	23.6301	25.9958	24.9217	25.1436	25.7995	25.5786	26.3276	25.2172	26.7195	25.7108	23.8145	25.0322	NaN	24.6545	28.1086	NaN	NaN	25.9165	24.2177	24.908	20.5769	25.0706				4	4	4	35.8	35.8	35.8	20.838	0	197.07	1926000000	52
NaN	22.5536	22.9435	NaN	22.1289	NaN	NaN	NaN	NaN	21.3585	NaN	NaN	22.2373	NaN	21.8949	21.6879	NaN	NaN	NaN	21.5854	21.3014	NaN	NaN	NaN	NaN	20.7776	21.949	21.9408	21.7087	20.5036	22.3604	20.5919	NaN	21.949	NaN	22.4646				7	7	7	9.9	9.9	9.9	223.66	0	21.872	95286000	35
27.864	27.1655	27.319	28.2148	27.9852	28.3624	28.7191	29.0773	28.1018	27.3111	28.0943	27.2471	27.1427	28.2642	27.4036	27.1424	27.6464	28.4541	26.6767	27.8249	27.0322	27.1551	27.658	28.2324	26.988	26.9135	26.4823	26.8134	28.2764	27.1229	27.0481	27.3546	26.8621	27.4732	27.5983	28.0121				5	5	5	25.2	25.2	25.2	26.152	0	154.37	8790600000	215
26.3202	26.9611	26.1468	26.2832	26.287	26.0011	25.5455	26.5082	25.5088	26.1657	25.4991	26.3748	25.8528	25.4746	25.8025	26.2521	26.7988	26.1696	26.5102	25.9351	25.5713	26.133	26.1804	26.0696	26.4479	27.1476	26.1425	25.8185	26.1672	25.9787	26.0134	26.6054	25.9343	25.9594	26.4172	26.3169				16	16	16	52.2	52.2	52.2	49.203	0	323.31	3105500000	270
28.2535	28.2584	28.1295	28.3354	28.7968	27.9369	27.982	27.8153	27.4659	28.1881	27.6917	28.3534	28.1318	27.8113	28.155	27.7519	27.5144	27.805	28.5493	28.3698	28.1872	28.5554	28.1332	28.0132	28.5034	28.9779	27.873	27.8863	28.0787	27.8592	28.0012	28.6927	27.6773	28.1097	27.9585	28.6551				19	19	19	55.8	55.8	55.8	60.343	0	323.31	13634000000	771
24.2703	25.0465	27.3939	26.2449	25.0605	26.6633	26.8631	27.4143	25.8748	26.9857	26.454	26.8147	26.6393	24.5493	25.7653	25.9059	27.4306	26.2584	26.2404	28.2712	25.8675	25.3252	26.2985	26.0697	25.9901	24.2625	26.9719	26.5579	26.6306	26.4607	27.0553	26.5123	26.9846	26.3666	26.6678	25.4705				12	12	12	39.3	39.3	39.3	49.966	0	309.07	4203600000	152
22.9252	22.4342	23.9266	24.0404	23.8334	24.1913	24.2033	23.9516	25.2512	24.0032	24.5893	24.3627	24.0807	24.6898	23.711	24.5587	23.6805	23.7569	NaN	23.9265	24.8322	24.826	23.9792	23.3972	23.694	23.5326	25.66	23.7982	23.9939	24.4487	24.5582	23.7182	24.9444	23.6241	25.3382	25.6101				10	6	6	70.6	41.7	41.7	20.511	0	321.98	842270000	153
26.8223	27.4215	28.5651	27.7276	27.1196	27.2792	27.2746	27.451	26.5278	27.8042	26.8067	27.2902	27.6063	27.3823	28.2105	26.2357	27.152	26.8522	28.1431	28.1803	27.2502	27.34	27.2738	27.7165	27.1381	26.9315	28.2739	27.4963	26.5358	27.6581	27.7188	27.833	27.3499	27.2448	26.9535	26.158				6	6	6	29.8	29.8	29.8	29.225	0	110.23	7320800000	187
26.7152	27.678	27.6344	28.0012	27.854	28.4732	27.3163	26.9874	28.3773	27.854	28.1682	27.9998	27.5469	29.1833	28.7087	28.2278	28.8838	27.5946	27.3246	27.367	28.5385	27.6344	26.0312	26.7859	27.8692	27.6239	28.9847	28.3337	26.8091	28.5417	28.4693	27.4682	28.3977	27.7561	27.8812	28.4937				27	27	27	38.5	38.5	38.5	123.8	0	323.31	12148000000	518
NaN	NaN	22.2254	24.1556	NaN	23.6075	25.5846	NaN	24.8243	24.5278	26.7083	23.4707	25.0651	26.5563	23.1542	25.2702	26.5401	22.5735	NaN	NaN	24.8009	22.1568	22.0173	NaN	23.9106	NaN	25.9383	21.9778	NaN	24.6098	25.3134	NaN	25.973	23.2726	26.7394	24.5523				7	7	7	24.3	24.3	24.3	53.383	0	179.14	1063900000	96
NaN	NaN	NaN	NaN	22.0171	NaN	NaN	21.4977	NaN	NaN	21.265	21.6685	NaN	NaN	NaN	21.6199	NaN	NaN	NaN	NaN	21.0072	NaN	21.9061	21.51	22.5919	24.823	NaN	NaN	NaN	22.7894	NaN	NaN	21.8935	NaN	NaN	NaN				2	2	2	3.3	3.3	3.3	89.702	0.00050878	3.657	63929000	12
NaN	20.7447	NaN	20.4569	19.0463	NaN	NaN	NaN	NaN	19.9105	NaN	NaN	NaN	NaN	NaN	21.7676	NaN	19.6312	20.5894	NaN	NaN	NaN	19.988	NaN	20.5656	19.5495	NaN	NaN	NaN	NaN	NaN	21.0616	NaN	NaN	19.9834	19.7936				3	3	3	17.9	17.9	17.9	33.898	0.00027226	4.9223	28772000	20
24.4127	24.825	24.916	25.2251	25.7675	24.7153	24.6024	23.3885	24.3232	24.2196	24.3884	24.876	24.5779	24.3777	24.2316	23.8778	24.4787	25.3063	24.5215	24.2069	24.8631	25.3593	24.3563	24.4683	24.7624	24.8232	24.2306	24.6891	24.1101	24.757	25.1415	24.6233	24.3977	25.1267	23.7118	24.8865				8	8	8	8.1	8.1	8.1	232.3	0	155.34	1128600000	122
25.6626	25.4062	27.1485	25.7357	25.5775	26.1535	24.9436	25.2979	26.0883	25.7269	23.2946	NaN	25.3278	26.2767	25.3933	27.2887	25.7609	25.6617	26.8994	26.3117	26.046	26.9198	25.0658	26.04	25.632	25.1386	24.4605	26.3157	NaN	25.6571	25.9821	26.8755	25.1019	26.1055	25.6941	25.2235				4	4	4	30.8	30.8	30.8	17.094	0	89.672	2639200000	75
22.3793	21.9594	22.0639	22.4931	NaN	22.4722	NaN	24.5847	NaN	NaN	NaN	23.8843	NaN	NaN	NaN	25.1155	NaN	26.3353	22.5685	NaN	NaN	NaN	23.7605	23.3384	NaN	22.2054	NaN	21.6118	22.8724	NaN	NaN	21.8969	NaN	NaN	NaN	NaN				6	6	6	21	21	21	57.448	0	27.503	381940000	30
30.258	29.7618	28.6471	29.8852	30.039	29.442	30.0054	30.0181	29.7387	30.1426	29.9923	30.7759	29.9081	29.4083	29.1763	29.3859	28.8964	29.4282	29.8033	28.9573	29.7159	30.2473	30.1065	30.0321	29.3065	29.6324	29.4894	29.7989	30.0168	29.4144	29.0946	30.0679	29.6148	29.8587	29.885	29.9706				14	14	14	68.9	68.9	68.9	28.804	0	323.31	39089000000	667
NaN	NaN	23.1482	22.7315	22.2675	23.512	NaN	NaN	21.4825	23.1498	22.7833	22.3311	22.8357	20.0924	22.7264	21.973	NaN	21.6258	22.1147	23.1126	21.4762	23.23	NaN	22.8935	22.1701	21.749	23.4382	22.6194	21.7429	22.2314	23.462	22.4553	22.6884	NaN	23.1723	22.2155				5	5	5	20.9	20.9	20.9	44.969	0	24.428	249730000	51
21.9104	NaN	NaN	22.0546	21.7712	21.8998	NaN	NaN	NaN	NaN	NaN	22.038	NaN	NaN	21.3377	NaN	NaN	NaN	21.7957	NaN	NaN	21.4724	NaN	20.941	NaN	NaN	NaN	NaN	NaN	NaN	20.9306	22.0118	NaN	22.1996	NaN	NaN				3	3	3	4.4	4.4	4.4	88.515	0	39.614	45671000	13
26.1253	25.5845	24.3957	26.0573	24.2763	24.7821	26.2245	26.1752	24.6907	25.4939	25.7979	25.0799	26.1941	25.3389	25.1317	24.4738	24.095	26.0837	25.3269	25.1694	25.003	24.7676	25.5618	25.8167	25.8175	25.1439	25.3253	26.1863	25.3905	24.9233	24.8442	26.0021	25.0212	25.0484	24.0864	23.6171				3	3	3	44.4	44.4	44.4	12.587	0	323.31	1753800000	56
NaN	NaN	NaN	NaN	NaN	NaN	NaN	NaN	NaN	21.5288	21.4816	NaN	NaN	NaN	NaN	NaN	NaN	NaN	NaN	NaN	NaN	NaN	NaN	NaN	NaN	NaN	NaN	NaN	NaN	22.8176	NaN	NaN	21.9659	NaN	NaN	NaN				2	2	2	6.8	6.8	6.8	69.476	0.00049813	3.3636	24167000	4
22.741	NaN	23.1599	NaN	NaN	NaN	NaN	NaN	NaN	22.6722	22.3502	23.4611	NaN	22.7067	22.8141	NaN	NaN	23.3716	NaN	23.7559	NaN	22.505	23.1765	23.1119	23.3292	23.7602	22.17	NaN	22.8116	22.9638	23.0306	22.3078	22.2474	22.3707	NaN	22.1595				7	7	7	8.3	8.3	8.3	148.53	0	40.798	189310000	43
23.2372	23.221	22.7174	NaN	NaN	22.8156	22.6423	22.4377	NaN	23.0324	22.4202	23.0963	21.834	NaN	22.7752	NaN	NaN	NaN	NaN	23.307	NaN	NaN	NaN	22.4293	NaN	NaN	22.3383	22.5294	22.1757	23.1134	23.7909	22.4388	NaN	NaN	NaN	NaN				4	4	4	8	8	8	71.254	0	35.951	172950000	27
27.176	27.0439	27.7831	27.4713	27.2876	27.3921	26.7844	27.4757	26.6095	27.6591	27.3553	27.5093	27.6429	27.3763	28.4149	27.3329	27.3457	26.7416	26.8582	28.5881	26.9209	27.2879	27.872	26.9532	27.6121	27.1953	28.1241	27.8993	27.204	27.9421	28.2348	27.663	27.9366	27.2079	27.6449	27.0039				15	15	15	23.8	23.8	23.8	76.613	0	323.31	8252700000	440
25.601	26.96	26.9391	26.9404	26.8393	26.5548	26.8169	26.431	26.2566	26.1415	26.3561	26.5677	26.8421	26.4851	26.8812	26.7374	26.1876	26.8623	26.6909	27.0476	26.0783	26.6455	26.2195	26.1877	26.6576	26.8175	26.4771	27.1287	26.1909	26.6497	26.8379	26.5131	26.2718	26.6716	26.14	26.6667				20	18	17	29.9	27.8	27	102.48	0	323.31	4221900000	377
23.3467	24.657	24.2785	23.7439	24.3489	23.2717	23.6348	23.8605	23.1968	23.523	23.5028	23.6261	23.5677	22.9301	22.7536	23.2741	22.7269	23.4311	24.2714	23.8199	23.4625	23.845	23.551	23.9277	24.1024	23.7158	22.5955	24.0197	24.6885	23.1226	22.9337	23.536	22.7478	23.418	24.24	23.0364				4	4	4	29.1	29.1	29.1	31.441	0	150.74	511620000	89
24.1034	24.8767	NaN	24.1373	23.809	23.5858	23.8648	24.2241	23.8502	24.1154	24.0297	23.7628	24.1498	NaN	23.9446	23.4072	25.9113	24.1312	24.1664	23.807	23.3936	24.1781	23.6178	24.2014	23.626	23.6971	23.4409	24.0962	24.1409	24.0595	23.4312	24.1975	23.7925	23.6941	23.7359	23.3784				3	3	3	19	19	19	24.551	0	283.37	695270000	57
24.5318	23.3173	24.5796	24.4302	23.8863	24.3786	24.1089	24.7948	23.5242	24.2159	23.3086	23.5326	23.444	23.325	24.3396	25.6919	24.7918	24.4203	24.1115	24.6471	23.8538	24.4	23.9653	24.0604	23.3569	23.6936	23.9017	24.7627	24.2661	24.245	23.6612	23.3691	23.6067	23.7297	24.3802	22.9782				6	6	6	33.3	33.3	33.3	27.391	0	169.43	807390000	99
NaN	21.1868	24.1286	NaN	NaN	22.3015	NaN	22.4226	21.1267	22.5979	NaN	NaN	23.4934	NaN	23.2348	NaN	23.8012	23.0962	22.9734	22.9626	NaN	NaN	22.5935	22.743	22.8999	22.8514	21.4533	22.3819	22.745	22.0553	22.903	NaN	22.1219	NaN	22.2062	22.5816				5	5	5	11.4	11.4	11.4	54.169	0	5.4067	192250000	23
21.4563	23.8753	23.2123	23.6552	23.611	24.4977	22.8507	23.6556	22.9613	23.674	23.1181	22.5144	24.0029	23.1078	24.5434	23.2864	23.7639	22.9593	23.2929	23.4659	23.5297	22.4404	23.1576	23.7892	23.5222	23.147	23.8247	23.3953	21.9504	22.1771	23.1942	23.4227	23.9186	23.1498	24.8022	22.8674				8	8	8	21.1	21.1	21.1	62.094	0	323.31	532600000	141
25.6925	25.153	25.5646	26.1428	25.7263	25.9131	26.3876	24.732	25.8849	25.1648	25.392	25.537	25.8434	25.8311	25.1802	25.1118	25.2576	25.9274	25.8516	24.1605	25.8618	25.25	25.1398	25.7446	25.2047	24.8075	25.3612	25.4981	25.1206	24.8314	24.7185	25.4316	25.6502	25.9548	25.0351	26.2158				9	9	9	50.7	50.7	50.7	33.824	0	13.873	2064100000	147
27.6435	26.2626	25.5213	27.1737	24.5393	27.4686	27.9674	25.7055	29.1712	27.4196	29.2889	27.6351	26.5806	26.0789	26.3158	27.7917	27.0252	26.1285	25.4629	24.6511	27.3231	25.5455	27.7351	25.8491	26.4343	25.2525	26.8085	26.3059	27.4997	26.285	26.1455	25.6063	28.1754	25.7227	27.9974	28.1766				6	4	4	35.3	26.9	26.9	23.602	0	323.31	6370500000	203
NaN	NaN	NaN	NaN	NaN	22.6099	NaN	22.1038	21.7923	22.3877	NaN	22.1325	22.7019	NaN	23.3206	22.1737	NaN	22.6479	NaN	22.9579	22.179	22.2505	22.3739	NaN	22.6689	NaN	22.5235	23.0122	22.7275	22.9033	23.0999	22.6399	22.5077	NaN	22.3625	NaN				5	5	5	24.6	24.6	24.6	41.213	0	7.8891	158360000	39
23.1781	NaN	22.363	23.5751	NaN	25.532	24.3049	24.2308	26.8151	24.407	24.8487	25.0627	25.8114	26.5615	22.1741	24.7246	26.9088	23.5036	NaN	23.8702	27.1678	24.9403	NaN	NaN	25.6654	NaN	24.3707	23.2791	23.2286	25.0903	25.9198	22.2022	27.6566	24.8113	26.7867	24.4434				14	14	12	28.8	28.8	26	106.46	0	181.42	1874800000	109
22.0197	21.3844	20.6925	24.1355	25.1216	25.3801	NaN	23.6095	28.1753	26.4605	26.3543	26.9214	25.1658	28.5313	25.0631	27.0501	27.4332	NaN	23.111	24.4659	28.5014	26.1015	NaN	20.9518	27.5456	20.5145	26.4738	24.0593	24.6334	27.0664	27.5381	23.8422	29.0375	25.2165	28.3839	25.6338				16	16	15	30.8	30.8	29.4	101.39	0	323.31	4693900000	260
23.7143	24.7914	24.6934	24.2244	25.8497	24.3026	24.8195	25.4813	23.621	25.6183	23.8141	25.5062	24.707	24.3113	24.7409	25.2935	24.3612	24.5155	25.1932	25.0109	24.7693	23.8532	25.4497	25.5821	25.3565	25.9046	24.2337	24.2617	24.2008	25.1922	25.2228	25.9568	24.7345	25.3558	24.8622	24.9483				14	14	14	20.6	20.6	20.6	105.43	0	221.77	1409500000	162
25.4993	22.7185	NaN	24.0901	25.9091	26.2714	25.1438	25.3199	26.4292	23.5483	25.2896	24.5977	24.1144	26.9426	23.4269	25.7596	23.5487	24.9627	NaN	25.0851	25.5821	24.1617	NaN	25.3063	23.5558	NaN	25.1233	22.9751	25.2297	23.9822	24.4	23.7507	24.4017	24.339	26.3914	26.5226				10	10	10	27.9	27.9	27.9	54.446	0	195.16	1257800000	112
32.6166	31.6756	30.4436	31.3776	31.7351	32.7169	31.6154	32.2259	31.7255	30.5794	30.7291	31.1869	32.2572	30.7917	29.5529	31.2918	30.2751	32.7121	31.6104	31.3376	30.8197	30.8305	31.5332	31.6143	30.7508	30.3655	29.953	30.7942	32.8423	29.7849	29.9324	31.4508	29.8369	30.2063	31.9864	31.0725				23	23	23	69.5	69.5	69.5	49.955	0	323.31	147060000000	2823
NaN	21.6133	NaN	20.6382	NaN	NaN	NaN	20.402	NaN	20.5039	20.3823	NaN	NaN	20.8879	20.8516	21.5784	23.0634	NaN	NaN	21.6055	NaN	NaN	NaN	NaN	21.0847	20.9845	21.1046	21.0059	NaN	NaN	21.0948	NaN	20.8335	21.0729	NaN	NaN				5	2	2	7.6	3.3	3.3	130.62	0.00026582	4.4173	59804000	16
NaN	21.6306	22.5933	NaN	20.6232	NaN	NaN	NaN	NaN	NaN	NaN	NaN	NaN	NaN	22.162	NaN	NaN	NaN	21.2846	NaN	NaN	NaN	NaN	NaN	NaN	22.4133	NaN	NaN	NaN	NaN	22.9753	22.6105	NaN	22.3696	NaN	NaN				3	3	3	4	4	4	110.41	0.0019079	2.8129	46242000	10
27.1189	26.7227	27.1759	27.3479	26.7877	25.4496	25.0129	26.7667	24.8961	26.5333	25.9292	25.7191	25.4718	27.2079	26.2378	24.6586	25.3254	26.0761	27.1319	26.431	26.5226	26.7248	26.4525	26.0643	25.474	26.6375	26.0079	27.0445	26.4817	21.5183	25.761	25.9298	27.1744	26.9008	26.3353	26.8684				4	4	4	31.9	31.9	31.9	29.38	0	137.76	3312800000	100
24.4849	24.7357	23.8434	24.3417	23.5197	24.6304	24.5163	24.3553	23.7268	24.446	24.4376	24.7648	21.7118	23.8267	24.4055	23.3151	22.691	21.1349	24.1686	24.6723	NaN	22.8139	24.9104	24.3463	24.5369	24.4232	24.3536	24.3155	24.4678	24.1631	24.4722	24.7665	24.3705	24.9109	24.3809	24.9247				4	4	4	17.7	17.7	17.7	38.388	0	42.94	770840000	74
NaN	NaN	NaN	NaN	NaN	NaN	NaN	NaN	NaN	NaN	NaN	NaN	NaN	NaN	NaN	NaN	20.9269	NaN	NaN	NaN	NaN	NaN	NaN	NaN	NaN	NaN	NaN	NaN	NaN	NaN	NaN	NaN	NaN	NaN	NaN	23.1513				2	2	2	7.9	7.9	7.9	48.206	0	5.4922	7960700	3
26.9751	27.6516	27.3375	27.707	27.2415	26.6626	26.968	27.2541	26.5329	27.5298	26.7013	27.2681	26.5823	26.6988	27.6626	26.6328	26.5127	27.1349	27.7169	27.0831	26.5862	27.6447	27.5021	27.3788	27.1939	26.9836	26.9798	27.5017	26.9719	27.2955	27.7336	27.9478	27.2049	27.7177	25.8756	25.7051				11	11	11	30.9	30.9	30.9	50.315	0	323.31	6386100000	256
22.0587	24.0595	24.5143	25.5161	23.6925	25.0972	24.3469	NaN	28.7366	24.3235	26.0723	26.5411	NaN	22.6898	21.7127	NaN	25.516	23.506	24.9895	NaN	24.4582	24.388	23.8215	NaN	26.3323	22.5593	25.0469	24.1947	22.4355	22.3662	24.9958	25.9047	25.4001	25.7136	25.0855	29.294				6	6	6	40.6	40.6	40.6	26.885	0	139.68	2142500000	111
23.2163	27.6202	29.5093	26.247	25.2265	26.7073	23.5078	NaN	25.4613	25.8511	26.5313	25.8303	24.1868	25.6272	24.2584	25.0148	26.0734	26.7667	27.5086	NaN	25.8106	25.2369	23.5838	26.2099	27.5704	25.5905	NaN	28.766	23.1532	26.9989	24.3817	27.0324	25.5873	26.8913	25.2909	23.7442				5	5	5	17.7	17.7	17.7	29.533	0	323.31	4034600000	62
NaN	22.2042	23.9681	22.5394	23.7095	NaN	NaN	NaN	NaN	23.8676	NaN	NaN	NaN	NaN	23.4851	23.688	NaN	NaN	24.0434	21.9174	21.5937	22.6794	NaN	NaN	23.2871	23.9306	NaN	24.3718	NaN	NaN	NaN	24.3573	NaN	22.6089	NaN	NaN				3	3	3	6.6	6.6	6.6	75.798	0	9.2972	210680000	21
25.219	26.0683	24.952	25.971	26.0566	25.2969	25.0137	26.4606	25.305	25.6098	25.5807	26.3351	26.6506	24.8038	25.6416	26.2002	24.7293	25.6303	26.2538	24.2003	24.9858	26.5598	26.3929	26.2217	25.8228	25.3402	24.827	25.4298	24.994	23.7	24.9841	25.9026	25.1284	25.3789	25.9424	25.4749				6	6	6	68.5	68.5	68.5	17.699	0	281.39	2407000000	199
23.2182	23.1968	23.63	23.0611	23.6995	23.1729	23.1297	23.2465	23.5028	22.506	23.3938	22.0658	23.4059	22.8203	22.922	22.6348	22.3687	23.5986	23.4939	23.067	23.116	22.9872	22.2869	23.086	22.9835	23.7073	NaN	23.0922	23.1711	22.5233	22.6828	23.1658	22.2021	23.109	23.0601	22.7699				6	6	4	42.7	42.7	32.1	24.389	0	83.126	342160000	69
23.1902	22.7658	23.2522	23.4529	NaN	23.9729	24.2836	22.8689	23.7304	23.3834	23.6136	23.1946	24.0459	23.9255	23.097	23.0333	22.6415	23.0319	23.6239	23.5642	23.5587	22.9275	22.9467	22.6763	23.0608	23.4575	23.4488	22.6118	23.9744	23.0769	23.1676	23.2594	22.8799	23.1844	23.6475	23.7372				6	4	4	46.3	35.3	35.3	22.178	0	280.99	501950000	134
24.1112	24.0092	22.4298	21.3449	23.5078	21.0505	NaN	21.3664	NaN	22.9611	22.2029	NaN	NaN	NaN	NaN	21.8832	NaN	24.7425	24.2467	NaN	22.0043	24.1083	21.6583	NaN	22.3223	22.6292	NaN	22.5749	24.6701	NaN	22.8184	21.9603	NaN	23.6957	NaN	20.3439				4	4	4	36.4	36.4	36.4	12.059	0	44.131	263410000	45
25.1152	28.4637	25.5637	26.1618	25.799	27.9901	24.6537	26.0979	24.1936	25.6747	23.8043	24.3214	26.1773	23.4963	26.7162	24.3714	27.3469	26.3463	26.3229	25.4645	25.5417	25.898	25.5808	26.674	25.9516	26.3947	24.6473	25.3363	24.8856	25.1402	25.2237	25.8516	26.3011	26.2158	27.3964	24.6722				16	16	13	38.8	38.8	31.4	75.519	0	323.31	3491400000	196
22.4503	24.3348	23.9853	NaN	NaN	23.106	NaN	23.107	NaN	23.2057	NaN	23.0131	22.9942	22.7076	24.5645	23.0335	23.2363	NaN	NaN	25.1682	NaN	23.741	22.9234	NaN	23.7472	23.1769	23.2205	22.7628	23.1168	23.3275	23.7979	23.5261	22.4432	23.5844	24.2773	NaN				10	7	7	22.2	15.4	15.4	82.088	0	88.383	335350000	38
28.0011	27.5317	27.2881	26.895	27.1549	27.5574	27.1793	28.0824	27.4206	27.4181	26.9038	27.222	27.4417	26.9937	27.4155	27.3668	27.7244	27.9563	27.6338	27.7616	26.8794	27.4923	27.6574	28.3757	27.4816	28.2349	26.7352	27.5306	28.0681	27.0606	27.269	27.5749	26.4582	27.2776	28.1504	27.3365				9	9	9	46.1	46.1	46.1	26.489	0	323.31	8453700000	390
26.961	25.7583	25.1612	26.1983	25.2287	25.4693	26.6555	26.3573	26.4664	26.0584	25.6967	24.9875	25.8953	25.795	26.114	NaN	24.4264	26.6221	26.2778	26.187	26.4909	27.069	26.2124	26.9456	25.6855	26.9146	25.8232	26.1646	26.2179	25.0848	25.9049	25.9493	24.2686	25.88	26.1259	25.5276				4	4	4	28.9	28.9	28.9	30.993	0	137.28	2631100000	81
26.2265	27.1371	26.542	26.8097	25.9278	25.736	26.0139	26.116	25.4405	25.7566	26.0746	26.5181	27.2203	25.3764	25.776	24.9644	25.1985	26.1475	25.9016	26.0242	27.028	25.1519	26.1507	26.1225	25.8348	24.9561	25.8433	25.5596	25.6279	25.8808	26.4403	25.3196	25.3826	24.6366	25.969	25.0203				3	3	3	40.7	40.7	40.7	16.762	0	323.31	3418800000	114
26.5627	27.806	28.663	27.232	27.3908	27.7496	27.9403	27.8198	27.1247	28.4377	28.0295	28.4225	27.9496	28.2221	29.3376	28.3937	27.6303	27.1359	27.3421	29.2165	28.3208	28.1084	27.1955	27.9244	27.6747	26.6894	28.8705	29.0043	27.0817	29.2098	29.1468	27.2806	28.358	28.1001	27.5472	26.7748				17	17	17	39.8	39.8	39.8	66.408	0	323.31	12645000000	366
26.5556	26.2857	26.4747	25.9798	26.4255	25.5931	23.2545	27.0115	23.9295	25.7337	25.1015	26.0651	26.3779	24.2792	25.9742	25.8364	24.8233	26.6604	26.5188	26.2762	25.1061	26.4162	25.9793	26.3493	25.6712	27.6364	24.7753	25.8511	26.7304	25.8511	26.4462	26.5838	25.1844	26.0245	24.485	24.732				12	12	12	15.8	15.8	15.8	134.43	0	323.31	2707600000	308
25.6871	24.2668	25.8732	22.8339	23.3707	23.6258	NaN	22.6931	23.6761	24.8044	24.5339	25.5922	22.7864	NaN	24.6921	24.4132	NaN	23.1896	25.4987	26.2862	23.2577	24.5953	26.0017	24.5795	24.9038	24.3677	24.4799	24.288	24.1523	24.9898	25.1168	24.8131	24.5759	25.8317	24.064	23.0198				17	17	17	25.4	25.4	25.4	127.83	0	124.91	1081200000	145
NaN	NaN	NaN	NaN	NaN	NaN	NaN	NaN	24.4331	NaN	NaN	22.2179	22.8006	NaN	NaN	24.7292	NaN	NaN	NaN	NaN	NaN	NaN	NaN	NaN	NaN	NaN	25.2382	NaN	NaN	NaN	26.4325	NaN	NaN	NaN	25.9108	NaN				18	14	13	21.9	17.8	17	163.86	0	106.32	286640000	47
NaN	21.7083	21.9058	19.2766	NaN	NaN	22.8643	NaN	NaN	NaN	20.8117	22.8192	21.2098	NaN	NaN	NaN	NaN	NaN	21.7376	22.4505	NaN	NaN	19.5344	NaN	NaN	NaN	NaN	NaN	21.7219	NaN	22.4446	21.7964	21.9054	NaN	21.2399	NaN				2	2	2	6.4	6.4	6.4	47.583	0.004288	2.3527	65772000	12
23.7475	24.6713	26.2088	25.1152	24.6264	28.3274	26.5455	24.854	28.6921	27.2863	26.7753	25.9358	25.5437	28.293	27.7591	28.9753	29.6827	25.0071	24.6974	20.9767	26.7414	27.1659	24.6938	NaN	27.4592	25.4477	26.2247	26.9207	25.8264	27.4308	27.7158	22.4587	28.0702	26.5421	25.7355	22.8492				9	9	9	37.9	37.9	37.9	33.922	0	323.31	7735200000	244
22.7662	23.1068	NaN	NaN	NaN	22.5572	NaN	22.5823	22.275	21.7541	22.4608	22.6286	22.5251	NaN	NaN	22.5095	22.298	22.4776	NaN	21.8845	22.0902	21.6241	22.2507	22.3402	22.248	22.5028	22.3222	21.778	22.7888	21.9904	21.704	22.1008	NaN	22.4473	22.3841	22.9221				5	5	5	19.8	19.8	19.8	52.597	0	9.1956	168700000	30
NaN	NaN	29.8006	27.1784	25.8932	25.9795	NaN	NaN	NaN	NaN	27.0932	NaN	27.7593	NaN	NaN	NaN	NaN	NaN	27.1529	NaN	26.4431	26.8163	NaN	NaN	NaN	NaN	NaN	NaN	NaN	NaN	NaN	26.7078	NaN	26.8363	NaN	NaN				12	12	12	3.7	3.7	3.7	986.67	0	46.614	2093600000	17
25.3814	23.6731	23.9863	24.2944	25.1214	23.8873	24.257	23.8112	24.0347	24.2915	23.5707	24.0142	23.3209	24.0155	24.0732	24.2089	NaN	25.0495	24.4836	23.4143	24.9445	23.9281	24.1235	24.9247	24.6211	25.1044	22.7426	24.2339	25.2907	24.4861	NaN	24.7495	23.7876	24.2906	23.8175	25.3142				2	2	2	9.5	9.5	9.5	37.208	0	323.31	953160000	93
NaN	NaN	22.5082	NaN	NaN	21.6897	NaN	NaN	20.3602	21.4791	20.8237	22.3389	NaN	NaN	22.2895	NaN	NaN	NaN	NaN	22.0833	21.3819	NaN	21.8547	NaN	21.4699	21.6289	21.2618	21.5995	21.314	21.9101	21.2952	22.1826	21.4806	19.6449	20.9483	NaN				3	3	3	5.2	5.2	5.2	92.619	0.0002642	4.2891	87409000	26
24.8555	24.0004	24.6503	22.9811	23.1314	24.1231	24.2846	NaN	25.2749	24.3117	24.0084	22.518	24.1954	24.0694	24.3901	24.0498	23.6134	22.8045	24.9304	23.6866	22.838	23.3805	22.7915	NaN	25.1978	25.3851	25.4486	24.1919	23.3609	24.3623	24.9214	23.4569	25.7544	24.8744	23.7742	23.8353				4	4	4	24.9	24.9	24.9	26.559	0	323.31	759770000	97
28.4464	27.4313	27.2286	27.1764	27.514	28.2914	27.7773	28.6489	28.0145	27.4536	27.634	27.6705	28.2016	27.5424	26.9307	27.5075	26.5011	28.3282	27.1207	28.3186	27.3184	27.56	27.8617	27.9079	27.2829	27.2847	27.4141	27.3053	28.3016	27.2334	27.3466	27.8465	27.2834	27.5345	27.6794	27.6438				16	16	16	49.3	49.3	49.3	56.5	0	323.31	9513600000	666
24.5229	25.2246	23.3027	23.7388	24.2936	24.6534	24.2282	24.5749	24.0387	23.9219	24.0508	24.2133	24.2237	23.7777	22.8951	24.1833	NaN	24.6694	23.4807	24.8919	23.7861	22.6367	24.5024	23.6633	24.2396	23.9624	24.0065	23.7058	24.9134	24.0777	23.6777	24.1096	24.0031	23.869	23.8956	24.4506				7	7	6	22	22	19.9	43.941	0	186.68	783230000	154
30.6442	30.3908	30.658	30.7501	30.9385	30.9215	30.1702	30.479	31.2435	30.8836	30.9041	30.7045	30.1409	31.3407	31.1935	30.2289	30.7453	30.5225	30.3204	31.1524	30.606	30.4541	30.55	30.2132	30.9994	30.6681	31.8423	30.7671	30.5114	31.3147	31.2103	30.8439	31.3294	30.6863	30.7783	30.7196				65	65	60	44.5	44.5	42.7	280.01	0	323.31	79157000000	2360
NaN	NaN	NaN	21.6568	NaN	NaN	22.0216	NaN	NaN	NaN	NaN	NaN	NaN	NaN	NaN	NaN	NaN	NaN	NaN	NaN	21.7965	21.0753	NaN	NaN	NaN	NaN	NaN	NaN	NaN	NaN	NaN	NaN	NaN	NaN	22.3742	22.0879				4	4	4	10.8	10.8	10.8	59.681	0	6.2772	56788000	6
27.6506	26.7457	26.4297	26.4294	26.4089	27.8321	27.722	27.7214	27.238	26.6667	27.0343	27.1319	26.7137	26.9209	26.3335	26.9179	27.1136	26.9607	26.1188	27.2926	27.4473	26.4325	26.6377	26.3847	26.519	26.3998	26.9891	26.5881	27.2536	26.3646	26.8112	26.9032	26.8461	26.5307	26.5855	26.5565				17	17	17	30.7	30.7	30.7	98.398	0	323.31	5421600000	544
NaN	NaN	NaN	NaN	NaN	NaN	NaN	NaN	NaN	NaN	NaN	NaN	NaN	21.6852	20.8374	NaN	NaN	NaN	NaN	NaN	NaN	NaN	NaN	NaN	NaN	NaN	NaN	NaN	NaN	NaN	NaN	NaN	NaN	NaN	NaN	NaN				2	2	2	8.4	8.4	8.4	57.948	0.0021302	2.7389	9007700	5
NaN	NaN	NaN	22.497	NaN	22.3698	NaN	NaN	NaN	21.457	NaN	23.2191	NaN	NaN	23.7946	NaN	NaN	NaN	NaN	NaN	NaN	NaN	NaN	NaN	NaN	NaN	NaN	NaN	NaN	NaN	NaN	NaN	NaN	NaN	NaN	NaN				2	2	2	13.5	13.5	13.5	37.567	0	114.34	43673000	5
25.9998	27.1721	25.2995	25.1971	24.9768	24.1226	26.3659	25.5892	24.929	24.9342	25.2431	24.5122	24.551	24.1815	24.4338	26.0606	25.1375	25.969	24.4983	25.0747	23.8412	23.9163	25.5538	25.1892	23.9875	24.7003	24.8292	25.2912	25.617	23.8596	24.8699	24.3314	24.1395	23.9557	26.597	26.4914				11	11	11	54.4	54.4	54.4	30.772	0	208.5	2028000000	248
24.6834	23.942	25.4935	26.6157	24.9254	27.2323	25.9167	22.2126	29.4175	28.6078	29.419	26.9188	28.0494	29.0216	26.9963	28.4549	30.0032	23.7716	25.6487	25.1169	28.8188	26.6551	25.8402	22.5175	27.3575	NaN	29.726	25.4666	25.7478	29.2789	28.3458	23.647	30.3806	27.4883	27.1939	25.1029				10	10	10	39.9	39.9	39.9	41.654	0	323.31	14217000000	313
20.8789	22.9897	23.2915	22.1267	22.8986	21.0161	NaN	22.2522	NaN	NaN	NaN	NaN	23.6572	NaN	22.3313	NaN	NaN	22.7009	23.379	22.0193	20.5782	21.7414	21.0951	23.0051	21.5743	22.5255	NaN	22.4898	NaN	21.6062	21.6476	22.1517	NaN	21.6948	NaN	NaN				2	2	2	6.4	6.4	6.4	40.22	0	74.27	136770000	28
NaN	NaN	NaN	NaN	NaN	NaN	NaN	22.3636	NaN	21.9855	NaN	21.8786	22.8694	21.3824	23.5896	NaN	NaN	NaN	NaN	23.3961	NaN	21.9393	NaN	NaN	NaN	NaN	22.4722	NaN	NaN	23.3055	22.9243	22.1551	21.7075	NaN	21.2996	NaN				2	2	2	7.5	7.5	7.5	31.629	0	6.5175	98720000	19
NaN	NaN	NaN	NaN	NaN	NaN	NaN	NaN	20.638	21.2659	NaN	NaN	21.3011	20.3641	21.9982	21.2646	21.4664	NaN	NaN	21.7798	NaN	NaN	NaN	21.8886	NaN	NaN	21.1461	20.9829	19.5796	20.9799	22.472	NaN	21.1896	20.685	21.4109	NaN				4	4	4	19.6	19.6	19.6	43.122	0	18.786	55703000	31
25.1308	25.2527	24.4186	24.5873	24.9104	25.4428	25.589	25.0111	25.6142	24.7632	25.7821	25.3033	24.7921	25.6207	23.8991	25.7214	26.1523	24.1858	24.2474	25.1068	25.5045	23.7117	24.7457	24.2106	24.2463	23.0324	25.3041	24.4976	24.8545	24.6201	24.8622	24.31	24.825	25.0941	26.2012	24.5063				9	9	9	63.8	63.8	63.8	24.449	0	284.85	1623100000	156
27.4582	26.8091	26.3106	28.0573	27.389	28.4861	28.3434	28.7234	30.9741	28.9849	29.6383	29.7691	29.0127	31.3555	27.5524	30.2414	29.2295	28.4944	27.8626	28.2792	30.3339	27.5617	27.2735	27.6236	28.5603	25.7761	30.7404	28.1536	27.1142	30.0556	28.9243	26.5093	30.0629	28.1507	29.7954	28.355				26	26	26	59.8	59.8	59.8	77.328	0	323.31	27008000000	709
NaN	NaN	NaN	NaN	NaN	NaN	21.6827	21.6261	NaN	NaN	22.5161	20.3669	21.3026	NaN	21.5855	NaN	NaN	NaN	NaN	21.3305	NaN	NaN	NaN	NaN	NaN	NaN	21.6145	20.541	NaN	21.6005	NaN	NaN	20.7132	NaN	NaN	NaN				2	2	2	4.4	4.4	4.4	83.134	0	7.1854	35096000	14
24.3627	24.4232	24.9097	24.5544	25.6617	24.665	24.3996	23.8415	23.8762	24.2093	23.7915	24.2215	24.0562	23.4788	23.7076	24.1176	24.0547	25.4891	23.3632	23.7323	24.4273	24.876	NaN	24.9553	24.6259	24.9604	23.7215	23.9363	24.567	23.6588	23.9479	24.296	24.1134	24.5836	23.0537	24.1268				4	4	3	14	14	12	89.42	0	63.446	833620000	60
24.2816	25.4711	25.1363	25.2282	25.2346	25.1481	24.802	24.5647	24.8595	24.9695	24.9007	25.1704	24.9908	24.3115	24.5619	24.7388	24.4791	24.5398	25.4441	24.379	24.6528	24.9398	24.7224	24.8776	24.7698	25.1723	24.1967	25.2823	24.4265	24.9212	24.539	25.0559	24.7668	24.3251	25.1912	24.5219				4	4	4	35.2	35.2	35.2	24.636	0	323.31	1276300000	98
22.8059	23.9815	25.7823	23.9298	23.2102	25.1041	24.8791	24.8073	23.5758	25.046	24.6227	23.8268	24.9375	24.4718	25.7952	23.9476	24.137	24.2207	25.1277	25.6476	24.8703	23.3856	24.0953	NaN	24.3992	23.6999	25.6753	26.2014	NaN	25.8621	25.2787	24.7553	NaN	NaN	23.8754	NaN				6	6	5	36.1	36.1	32.7	33.784	0	21.637	1063800000	69
NaN	NaN	NaN	23.3703	23.5107	NaN	NaN	22.1864	NaN	22.8196	NaN	NaN	NaN	22.6748	NaN	NaN	NaN	NaN	23.8647	23.413	23.1894	23.1172	19.6999	22.7233	21.927	22.9964	NaN	22.9696	NaN	22.5298	NaN	23.3876	22.8704	23.2691	20.0394	NaN				4	4	2	17.5	17.5	12.9	29.455	0	77.666	171170000	44
26.3466	26.0739	26.0697	26.2338	26.1283	26.1631	25.355	26.1856	25.2934	26.0649	25.5508	26.0204	25.9738	25.6339	26.221	25.6217	25.8012	25.7392	25.481	26.5922	25.625	26.0175	26.2778	25.9769	26.1264	26.2057	26.3108	25.7452	25.9241	25.7231	25.5852	26.1845	25.7827	26.2641	25.9111	26.511				16	16	16	24.8	24.8	24.8	107.77	0	268.26	2585800000	314
20.2803	20.5305	24.204	NaN	NaN	22.8706	NaN	NaN	19.1704	19.7278	21.282	20.3322	22.0469	23.3568	24.3279	22.6672	25.9736	NaN	20.2054	NaN	NaN	21.0763	NaN	NaN	NaN	NaN	NaN	22.5938	19.2552	27.8548	22.2014	19.7084	23.2536	21.5692	NaN	NaN				25	25	25	12.8	12.8	12.8	458.22	0	234.92	561270000	79
26.1726	26.2056	25.7091	26.5026	26.5567	26.3718	26.0202	25.7482	25.4814	26.5281	26.2265	26.3444	25.8413	25.7342	26.188	25.0337	25.7508	26.3137	26.3794	26.0488	26.1099	26.5871	26.7734	26.143	25.998	26.1885	26.3789	25.842	25.517	25.8169	26.2972	26.6757	25.7413	26.3008	25.969	26.8191				14	14	14	49.6	49.6	49.6	47.079	0	323.31	3078100000	309
30.1469	30.3937	30.0888	29.9871	30.1232	30.5293	29.8961	30.2087	29.9691	30.372	29.9237	30.6868	30.4914	29.7674	30.3242	29.7909	29.5773	30.6028	30.2042	30.0379	30.0869	30.3908	30.5279	29.7353	30.1061	30.5223	30.2782	30.2021	30.4254	30.0068	30.1751	30.6081	29.9424	30.2077	30.1615	30.045				31	31	31	55.4	55.4	55.4	113.8	0	323.31	52646000000	1479
24.1702	24.0551	24.6206	25.5195	24.5612	25.0124	24.723	24.2034	24.7063	24.3085	24.0682	23.9232	23.4037	24.0185	22.4874	24.7085	23.8206	23.9992	24.2979	22.7981	24.9806	24.4841	23.3127	23.0436	23.2843	22.811	23.3507	23.7002	25.0674	25.2834	24.2671	22.6091	25.0674	25.1839	24.3475	21.9609				4	4	4	22.6	22.6	22.6	25.552	0	5.8868	1084900000	106
28.9125	28.8648	27.8489	28.3588	27.4536	28.1543	28.4398	28.9288	28.135	28.2737	28.118	28.1035	28.1413	27.9625	28.3532	28.3506	27.9454	28.1993	28.1059	27.899	28.6248	27.881	28.6653	28.5564	27.8887	27.288	27.9289	28.1026	28.3183	27.7956	27.6834	28.4836	28.2219	27.8999	29.0583	28.2984				9	9	3	52.8	52.8	16.5	30.137	0	109.86	12659000000	326
NaN	NaN	NaN	NaN	NaN	NaN	21.8261	NaN	22.7248	21.8597	22.5674	22.511	NaN	NaN	NaN	NaN	NaN	NaN	NaN	22.1148	NaN	NaN	NaN	NaN	NaN	NaN	22.6806	22.1254	20.7002	22.4941	20.9902	NaN	NaN	NaN	NaN	NaN				3	3	3	11.8	11.8	11.8	48.056	0	6.3774	57476000	6
30.2538	30.4164	31.007	30.8629	29.8063	29.8397	30.2749	29.8824	29.4077	30.3052	29.4582	30.0133	30.2375	29.3587	30.6749	29.2233	29.4894	29.5357	30.4423	30.5009	30.1234	30.0212	30.3946	31.0291	30.2181	29.5664	29.7629	30.617	30.3609	29.5892	29.7938	30.3687	29.3644	29.9194	29.574	28.9253				15	15	15	53.8	53.8	53.8	37.429	0	323.31	51956000000	885
NaN	NaN	NaN	NaN	NaN	NaN	NaN	NaN	NaN	NaN	NaN	NaN	NaN	NaN	22.1847	NaN	NaN	NaN	NaN	NaN	NaN	NaN	NaN	NaN	NaN	NaN	NaN	NaN	NaN	NaN	NaN	NaN	NaN	NaN	NaN	NaN				4	4	4	8.8	8.8	8.8	104.76	0.0025587	2.574	18991000	4
22.8511	23.8063	22.6448	22.6928	24.5025	NaN	23.3251	23.2278	22.9166	23.0672	NaN	22.9147	22.3084	NaN	23.9902	22.3804	NaN	24.0263	23.0462	23.9125	23.4578	24.2399	23.1188	23.6634	23.1726	24.2516	23.743	NaN	NaN	NaN	23.5987	23.357	23.0084	23.6558	NaN	24.4803				7	7	7	9.3	9.3	9.3	99.632	0	14.958	384520000	40
22.7468	23.8288	24.1362	22.2451	23.7676	22.6229	22.5257	22.8153	22.3965	23.7991	22.6942	23.9488	23.3918	22.5272	23.9935	23.579	23.9442	23.4069	23.9271	23.7928	23.4321	24.4717	23.6974	23.1774	24.0444	24.7734	22.8106	23.497	23.1781	23.7926	23.6726	23.4959	23.5382	24.0365	22.6794	22.8726				6	6	2	27.8	27.8	10.7	39.379	0	52.741	508270000	70
26.37	25.5081	26.6007	25.9089	26.2607	26.5484	26.3642	26.7936	25.9262	26.136	26.3159	26.0135	26.5474	26.8165	27.3094	25.945	25.7275	26.5036	25.371	26.7813	26.2604	26.7634	25.8332	26.5086	25.2566	25.9735	26.1318	26.5542	25.4916	26.8197	26.6576	25.3896	26.1392	26.7887	26.1963	25.3557				12	12	12	43.3	43.3	43.3	48.442	0	292.01	3515100000	264
NaN	NaN	NaN	NaN	NaN	NaN	NaN	NaN	NaN	NaN	22.3771	NaN	NaN	NaN	NaN	23.8259	NaN	NaN	NaN	NaN	NaN	NaN	NaN	NaN	NaN	NaN	21.7373	NaN	NaN	21.3709	NaN	NaN	21.6712	NaN	NaN	NaN				3	3	3	11.6	11.6	11.6	60.556	0	16.384	41544000	2
20.6484	20.2174	NaN	21.982	NaN	19.6646	21.3251	NaN	26.6867	21.5735	24.6306	25.4346	NaN	19.6394	20.9893	NaN	22.6547	23.2205	NaN	NaN	NaN	22.4234	NaN	NaN	NaN	NaN	24.1614	NaN	NaN	NaN	22.4483	18.0858	23.3733	NaN	NaN	28.2156				8	8	8	21.2	21.2	21.2	53.411	0	323.31	508180000	34
26.2419	NaN	NaN	22.1008	23.3395	23.6547	28.0493	NaN	25.9402	22.5368	26.4042	21.2753	NaN	27.3978	NaN	24.501	22.2419	NaN	NaN	23.803	25.0108	19.7101	NaN	NaN	NaN	NaN	24.715	22.3033	NaN	23.5373	20.4301	19.2885	24.5132	24.3204	25.9469	24.2767				19	19	19	21.6	21.6	21.6	166.01	0	83.181	967750000	102
NaN	NaN	21.1337	NaN	NaN	20.3672	NaN	NaN	NaN	NaN	NaN	NaN	NaN	NaN	NaN	NaN	NaN	NaN	20.5195	NaN	NaN	NaN	NaN	21.0763	21.3065	21.6261	NaN	21.1603	21.1528	NaN	20.4182	NaN	NaN	NaN	NaN	NaN				2	2	2	14.3	14.3	14.3	31.368	0.0019347	2.9618	17190000	10
NaN	NaN	NaN	NaN	21.7588	23.3851	NaN	23.3396	23.0648	NaN	22.9258	23.1923	22.5952	NaN	21.0385	23.0616	25.1146	NaN	NaN	22.0861	NaN	21.9318	24.386	NaN	20.4127	NaN	24.2662	NaN	23.4004	20.942	NaN	23.8533	24.2019	NaN	23.4188	21.1128				7	7	7	19.3	19.3	19.3	62.392	0	81.696	288740000	46
NaN	NaN	22.2569	20.3734	NaN	23.0301	21.3696	21.4739	26.1244	24.3054	24.2764	23.7211	23.688	24.54	23.3998	24.5551	25.3407	NaN	21.4385	22.8641	25.6397	22.4151	21.738	NaN	25.154	NaN	23.8233	23.9188	NaN	24.4266	24.1746	NaN	25.2405	23.2093	24.2476	21.8277				10	3	3	28.3	8.1	8.1	74.433	0	52.53	606120000	55
23.8916	23.6884	24.4607	23.6311	NaN	NaN	24.1063	24.2006	22.6315	25.1715	23.9035	24.3268	24.1279	23.5506	25.1721	23.6351	23.1626	23.3321	23.9076	25.162	NaN	23.2295	24.7036	24.1988	25.3145	25.5294	24.8441	24.6064	24.4048	25.2096	24.6298	24.924	NaN	24.8508	24.5879	NaN				3	3	3	16.6	16.6	16.6	33.969	0	160.55	764140000	54
NaN	NaN	NaN	NaN	NaN	NaN	NaN	NaN	23.5722	NaN	NaN	NaN	NaN	NaN	NaN	NaN	NaN	NaN	NaN	NaN	NaN	NaN	NaN	NaN	NaN	NaN	23.5958	21.352	NaN	NaN	NaN	NaN	NaN	NaN	20.705	NaN				4	4	4	15.7	15.7	15.7	56.084	0	31.514	31794000	8
NaN	NaN	NaN	NaN	NaN	NaN	NaN	NaN	NaN	NaN	NaN	NaN	NaN	22.4302	21.9253	21.3682	20.6219	NaN	NaN	NaN	NaN	NaN	NaN	NaN	NaN	NaN	20.1456	21.8612	NaN	NaN	NaN	NaN	NaN	22.218	NaN	NaN				3	3	3	4.4	4.4	4.4	119.09	0.0053667	2.2573	36807000	8
26.5496	26.8472	28.1734	27.3593	26.5008	26.8822	27.1685	26.8418	26.4951	27.6863	27.1959	26.847	26.8527	27.3076	28.2964	26.5079	27.3137	25.8354	27.0721	27.9833	27.2911	27.2003	22.662	27.2228	27.7978	26.2409	27.3621	27.6834	27.0236	27.9478	26.2772	27.6324	27.6304	27.4576	27.4319	26.0799				5	5	5	10.6	10.6	10.6	72.262	0	323.31	6306700000	119
23.7584	23.579	24.3063	23.8534	24.4668	24.2284	24.0044	23.8467	24.2456	24.1139	24.0606	23.8555	24.3431	23.9362	23.7516	23.8331	22.9865	24.5904	23.7002	24.3922	24.2652	23.2447	23.8649	24.1539	24.0108	22.967	24.0352	24.0038	23.8822	23.8995	23.7753	24.192	23.8912	23.6744	24.143	23.9229				11	11	11	44.3	44.3	44.3	51.169	0	51.557	694280000	110
27.2461	26.52	26.6994	27.5592	26.0461	27.3436	28.0775	27.7697	28.1592	27.3167	27.6727	27.0154	27.6121	29.3946	27.5652	26.3758	27.6744	26.7867	26.4956	27.1303	28.1007	26.9751	26.7913	26.7008	27.1956	26.1119	28.9203	26.6248	26.616	28.2405	27.6525	26.6005	28.2897	27.6415	27.8964	25.1366				8	8	8	31.9	31.9	31.9	23.742	0	84.157	7921100000	197
NaN	NaN	26.0271	NaN	NaN	NaN	NaN	NaN	NaN	NaN	NaN	NaN	NaN	NaN	NaN	NaN	NaN	NaN	NaN	NaN	NaN	NaN	NaN	NaN	NaN	NaN	NaN	NaN	NaN	NaN	NaN	NaN	NaN	NaN	NaN	NaN				2	2	2	38.3	38.3	38.3	10.546	0.00098717	3.2355	75072000	3
23.6893	NaN	24.8553	24.2013	25.559	26.6146	26.0586	26.6481	25.7051	24.967	26.7049	24.3688	25.9088	27.1238	26.7572	24.1914	25.5878	25.3196	21.0361	26.3525	25.1989	25.3467	24.898	24.7587	23.8392	21.7452	25.8984	25.6501	25.1728	25.8823	26.0376	24.0036	25.4897	25.1945	25.7098	25.2646				16	16	16	46.1	46.1	46.1	65.443	0	323.31	1897000000	108
30.4726	27.5134	27.6873	28.9833	28.8552	30.7618	29.3043	31.4561	27.5913	28.125	27.833	28.3201	30.027	27.3745	27.7959	28.0512	27.3948	30.3994	28.0604	29.8001	27.6891	28.1048	29.4148	29.6944	28.0509	28.4247	27.537	28.3848	30.5955	27.3066	27.418	28.9437	27.4156	28.1147	29.1472	28.0344				23	23	23	73.7	73.7	73.7	53.165	0	323.31	24847000000	787
29.2098	29.3804	29.8987	29.737	29.6075	28.9157	29.1783	29.3787	28.9118	29.4147	28.7943	29.1697	29.5015	29.3727	29.7356	28.3808	28.3756	29.2526	29.9212	29.628	28.6154	29.7503	29.4227	29.7301	29.6113	29.5197	29.1123	29.5615	29.2169	29.1033	29.3934	30.0279	28.9618	29.5904	28.9152	29.4761				11	11	11	55.1	55.1	55.1	26.688	0	323.31	29453000000	464
NaN	NaN	NaN	NaN	NaN	NaN	NaN	21.5462	NaN	22.429	22.2763	21.5721	21.7139	NaN	22.6039	NaN	21.7229	NaN	NaN	22.6986	NaN	NaN	NaN	NaN	22.6762	23.6016	21.0859	22.0978	21.889	22.5158	22.7126	22.1897	22.5511	22.7409	NaN	NaN				6	6	6	7.9	7.9	7.9	133.28	0	72.871	95598000	16
21.669	23.2914	23.4037	24.4065	23.4005	24.8391	24.483	24.5271	23.7595	22.884	24.1845	23.2412	23.4013	24.2675	23.7298	23.8418	22.0255	24.3382	21.2314	24.4874	23.6305	23.5645	23.0966	23.8839	23.1039	21.9418	23.8882	23.4475	23.5713	23.1857	23.7573	23.4819	22.7189	23.4244	24.9741	22.4042				8	8	8	16.1	16.1	16.1	71.381	0	96.414	543870000	149
22.988	23.6596	24.9727	23.7837	23.1537	24.6713	24.1641	23.6469	23.8812	24.0279	23.8838	23.814	24.1565	23.4633	24.2641	23.335	24.733	24.0123	24.2091	22.9772	23.7025	24.5659	24.0174	24.0182	23.7775	23.8252	20.2396	23.5578	23.6132	23.6327	24.2136	24.2841	23.7443	24.2434	24.0097	23.0752				3	3	2	8.1	8.1	5.6	50.031	0	73.136	651130000	79
26.1388	25.1467	26.7738	26.2559	26.7445	25.2601	26.062	25.4321	25.8074	25.2415	25.4923	26.2315	26.1059	26.5076	26.7708	24.75	25.9075	26.0404	26.0937	25.4734	26.0805	26.1887	25.8149	27.1583	25.6774	26.2162	26.0237	NaN	25.6541	25.9879	25.9099	26.8038	26.3892	26.2917	24.1437	26.0389				7	7	7	19	19	19	47.716	0	54.04	2769400000	138
32.2642	30.8703	30.3635	31.2502	30.8576	30.2365	30.0111	31.4928	30.2733	31.098	30.4866	30.2958	30.9036	30.7162	31.2734	30.2914	29.951	30.8945	31.1303	30.996	30.3292	30.8415	31.021	30.9345	31.2976	31.5717	30.263	31.0244	31.6957	30.3797	30.3534	31.1917	30.1476	31.2751	30.8155	30.7184				10	10	7	59.6	59.6	42.8	18.502	0	323.31	94319000000	1085
24.9843	23.9997	25.7592	25.1623	24.2728	25.2955	24.998	25.2066	24.7106	25.5636	24.9772	24.901	26.0928	24.5614	25.7256	23.3897	24.4542	24.0876	25.2792	25.6148	26.6132	24.8934	25.2279	25.2891	25.3522	25.678	25.5015	25.636	25.5579	25.244	25.4544	25.8017	25.1578	25.6291	25.1649	24.7884				7	7	7	17.2	17.2	17.2	69.15	0	209.29	1563600000	125
22.3398	22.7471	22.9109	22.9426	23.7563	22.4504	22.675	22.1087	22.1643	22.1413	21.9712	22.4603	22.1465	22.5949	21.9748	NaN	22.1927	23.176	23.7633	22.477	22.8218	22.7721	21.8933	22.9259	22.8809	23.3625	21.6676	22.5736	23.1866	22.2163	21.7559	23.0094	21.4976	22.5865	22.0757	21.8431				4	4	4	23.2	23.2	23.2	39.103	0	130.39	240840000	59
23.3641	23.4072	23.4717	22.8888	23.9152	23.443	22.5258	23.2708	22.7878	23.4895	23.3425	24.2568	23.2718	NaN	22.8068	23.442	23.8064	22.6053	NaN	23.309	22.5069	23.2508	22.9063	22.45	23.4031	23.7281	23.2802	23.0602	23.947	21.9672	23.58	23.6176	22.3419	23.8431	23.0658	22.2163				8	8	5	9.6	9.6	5.4	133.93	0	323.31	382350000	55
25.759	26.1913	25.5252	25.746	25.4431	20.7188	25.138	25.0829	21.3461	26.1163	24.7059	26.524	24.3819	25.0359	26.127	26.3151	24.6041	25.3015	25.9893	25.4016	24.7189	26.009	25.8493	25.6712	26.1232	25.9924	24.8956	25.9635	26.0927	25.8533	26.0852	26.3016	25.5215	26.4292	22.9973	24.5038				14	14	14	27.8	27.8	27.8	82.629	0	323.31	2191700000	252
NaN	NaN	22.4329	NaN	NaN	23.2758	22.0213	22.8433	NaN	21.8347	NaN	21.8126	NaN	NaN	21.9497	NaN	21.5868	NaN	NaN	23.0365	NaN	NaN	NaN	NaN	21.1089	NaN	23.3233	22.0206	NaN	22.9744	22.5602	NaN	21.9411	NaN	NaN	NaN				7	7	7	15.5	15.5	15.5	73.776	0	13.675	105820000	26
NaN	NaN	23.881	24.3511	NaN	22.7577	NaN	NaN	NaN	NaN	NaN	NaN	23.787	24.0489	23.8538	22.7773	NaN	23.8366	NaN	20.7776	NaN	NaN	NaN	NaN	NaN	22.8186	NaN	NaN	NaN	NaN	NaN	NaN	NaN	NaN	NaN	23.4963				5	5	5	25	25	25	21.064	0	6.1975	164430000	12
NaN	NaN	NaN	NaN	NaN	NaN	NaN	NaN	NaN	22.3293	NaN	NaN	22.7527	NaN	NaN	NaN	NaN	NaN	NaN	22.168	NaN	NaN	NaN	NaN	22.6312	NaN	22.0329	21.9082	22.0306	NaN	NaN	22.6228	NaN	NaN	22.7467	NaN				4	4	4	7.7	7.7	7.7	90.069	0.0007446	3.3224	54282000	9
23.3378	23.6282	24.8659	22.7065	23.3465	23.7328	NaN	NaN	22.7211	NaN	21.5686	NaN	NaN	24.173	NaN	NaN	23.9983	23.8605	NaN	NaN	22.2293	NaN	NaN	NaN	23.0098	NaN	NaN	25.7174	22.394	22.5346	NaN	NaN	NaN	NaN	NaN	NaN				3	3	3	42.6	42.6	42.6	14.893	0	23.469	274290000	21
NaN	NaN	NaN	NaN	NaN	NaN	NaN	NaN	22.0024	NaN	NaN	NaN	NaN	NaN	NaN	NaN	NaN	NaN	NaN	NaN	NaN	NaN	NaN	NaN	NaN	NaN	NaN	NaN	NaN	NaN	NaN	22.7034	NaN	NaN	NaN	NaN				2	2	2	15.3	15.3	15.3	30.925	0.00026261	4.184	13910000	3
24.7184	24.7447	23.2144	26.6607	26.3726	24.9242	27.7959	NaN	30.616	25.549	28.0701	28.6497	22.2926	26.0243	25.4427	23.1512	26.8231	25.3473	19.9211	NaN	24.4531	21.327	25.4207	NaN	27.0425	23.2019	26.5319	19.9778	NaN	NaN	NaN	23.4737	27.167	27.0213	24.8518	32.3864				7	7	7	43.8	43.8	43.8	27.807	0	84.588	7945600000	109
26.7173	26.5914	25.3773	26.4124	25.8996	25.7705	26.5325	26.3114	25.7785	26.2794	25.7138	26.2446	26.917	26.3623	26.7945	25.296	25.1144	25.8666	26.259	26.1091	24.1993	25.6701	26.5888	26.1268	25.5466	25.1624	26.0994	26.1172	26.4627	25.9631	25.8357	26.5228	26.5161	26.2579	26.182	26.325				4	4	4	34.7	34.7	34.7	24.763	0	323.31	3041600000	106
NaN	NaN	21.6043	NaN	20.9294	22.5329	21.8366	NaN	NaN	NaN	22.2559	21.977	NaN	NaN	22.8054	NaN	NaN	NaN	NaN	23.0879	24.1762	22.4295	NaN	NaN	NaN	21.8825	23.0592	NaN	NaN	23.2661	23.4507	NaN	22.4192	22.3359	NaN	NaN				3	3	3	15.2	15.2	15.2	28.908	0.00025846	3.9163	118950000	14
22.4762	21.0947	22.5932	23.0796	22.9041	24.709	24.1933	24.4197	23.5403	21.7605	24.5799	23.6427	24.8172	25.577	22.8915	24.7194	23.3418	23.6914	NaN	23.3041	23.9354	22.5452	22.3548	NaN	22.5083	23.5849	24.1318	21.2189	22.4547	23.5842	23.5574	21.5954	23.4411	22.7767	22.6691	23.2049				8	8	8	20.5	20.5	20.5	60.518	0	132.13	534800000	151
26.3697	27.1335	27.031	26.8154	26.3694	25.6604	26.2403	26.153	26.246	26.2104	25.7167	26.2788	25.9224	26.1883	26.3245	25.7545	25.7248	26.3539	26.8132	26.1621	25.9104	26.5401	26.3502	26.9233	26.0916	26.3021	25.7107	26.4933	26.6373	25.8871	25.8861	26.3258	25.901	26.2961	25.9648	26.2644				7	7	2	65.8	65.8	19	18.042	0	322.31	3152700000	200
24.4387	24.5284	25.7867	23.9725	23.1149	25.6356	25.6431	25.5848	24.6431	25.2433	25.5371	24.6464	26.0385	26.075	26.315	25.2019	24.987	24.393	24.0536	25.8185	24.8393	24.9703	24.5711	24.9213	24.2488	24.0283	25.9046	25.7385	23.6664	26.0441	25.768	24.2617	25.8228	24.9642	25.1939	23.9631				6	6	6	24.8	24.8	24.8	45.199	0	323.31	1839100000	175
28.3547	28.4972	28.7224	28.7818	28.6429	30.1034	28.8755	28.6051	30.0389	30.0668	30.7586	29.4663	29.7065	30.4049	29.8108	30.0947	30.3641	28.5327	28.6194	30.2458	29.4081	28.2944	28.3636	28.0895	29.2445	27.7308	31.7126	29.6737	27.1646	31.6422	30.2937	26.791	31.5651	28.2507	30.7064	29.6575				55	55	2	42.2	42.2	1.8	240.85	0	323.31	48079000000	1755
24.6461	26.1699	NaN	26.6736	24.32	25.6692	NaN	24.8616	27.3266	25.6593	26.4441	25.7589	24.8482	27.2065	25.5919	24.9105	25.9021	26.4399	25.231	22.7573	25.5734	NaN	25.001	NaN	26.0501	23.7557	26.945	25.9473	24.7085	26.4171	25.9116	25.302	26.615	25.2917	NaN	NaN				10	4	4	79.7	41.3	41.3	19.827	0	323.31	2268900000	71
NaN	23.0255	23.7603	23.012	22.8258	22.0629	NaN	NaN	22.8736	23.3554	22.8865	23.4241	22.4376	23.0332	23.7859	22.2616	23.6531	23.2677	22.6756	23.5029	23.0889	23.2744	22.7446	23.1461	23.286	23.3966	23.7666	23.165	22.8431	24.0783	23.6377	23.1302	23.0181	22.6971	21.6944	22.2904				8	8	8	6.6	6.6	6.6	217.17	0	101.22	374880000	65
23.6446	23.6788	24.4804	23.8115	25.0768	23.7619	23.172	24.619	23.1206	24.2589	22.4514	24.5177	24.2713	21.9327	24.088	24.4781	23.471	25.0847	24.3527	24.3852	24.0434	25.0693	23.5507	24.2687	23.9328	25.2065	23.2819	23.8791	23.7585	23.4855	23.8103	24.5524	NaN	23.789	22.973	24.423				12	12	12	24.5	24.5	24.5	79.573	0	98.381	788660000	142
24.8911	25.677	25.158	26.1088	25.6801	24.9668	24.9833	24.9041	22.7682	25.5661	24.5789	25.4823	24.5426	23.9082	25.0602	24.6184	24.3719	25.3499	25.6876	25.1719	24.714	25.5869	26.1469	25.4602	25.0122	25.3662	24.8131	24.872	25.004	24.9104	24.7922	25.5683	24.8019	25.3027	25.6139	25.6752				12	12	12	23.6	23.6	23.6	90.98	0	166.72	1490500000	251
22.9586	23.5124	23.3153	23.7919	23.1479	22.7186	23.7995	22.669	22.1499	23.2255	22.6438	22.9878	22.6952	NaN	NaN	22.5972	22.0206	NaN	23.4763	22.5928	22.7818	22.7578	23.0857	23.74	23.3972	22.6754	21.819	23.547	23.1547	NaN	NaN	23.2687	22.3664	23.198	22.2433	NaN				3	3	3	28.5	28.5	28.5	22.831	0	104.86	298920000	32
24.3076	23.8844	23.0392	23.8747	22.9297	24.1049	23.0821	23.7381	25.1506	23.6305	24.9226	23.7678	24.0215	23.7317	22.5884	25.8944	25.5584	23.0488	23.2121	22.9417	24.2561	23.5584	23.4849	23.7946	24.0876	NaN	23.8027	22.7541	23.8328	23.7888	23.5965	22.08	24.9655	23.3973	24.7995	23.6623				4	4	4	20.5	20.5	20.5	34.258	0	92.619	755520000	111
24.246	23.9581	23.9396	24.8754	24.1893	24.3406	24.1889	23.8985	25.1647	24.2155	24.754	24.8126	24.3461	24.6892	24.6406	26.0907	24.8424	24.4507	24.3602	24.1007	24.6502	24.727	24.1181	23.9853	24.3452	23.8334	24.2917	24.0965	24.5943	24.3476	24.2966	23.9452	24.987	24.5264	23.7139	24.3464				5	5	5	27.3	27.3	27.3	33.178	0	65.114	1131500000	170
29.9874	29.4663	29.1345	30.1294	29.6126	29.374	29.4023	28.6316	29.1767	28.8746	29.3169	28.7615	29.7352	29.9259	29.671	28.4486	28.4661	29.5668	29.4189	28.9087	29.5761	29.4786	29.6638	29.6513	28.8069	28.9007	29.0502	29.5067	29.0692	29.0447	28.781	29.8085	29.1082	29.5429	29.0743	29.2422				6	6	6	62.1	62.1	62.1	14.515	0	323.31	36776000000	316
23.6229	23.59	24.2942	23.9094	23.8257	23.6172	24.131	23.5369	23.2987	23.9466	23.4713	23.8818	24.2857	23.7589	24.2127	23.7659	23.5879	24.2137	24.1937	24.4268	23.901	23.7652	24.1669	24.1061	24.0984	24.4721	23.8545	24.088	23.9561	24.037	25.0543	24.0964	23.8811	23.9429	23.735	24.0766				6	6	5	22.9	22.9	19.4	38.044	0	97.522	665340000	170
23.3487	22.9912	22.7096	23.147	24.2595	22.6973	23.7519	23.4957	22.7641	22.4604	22.7737	22.5874	22.7756	NaN	23.1385	22.5766	21.6028	22.4827	23.5986	22.3963	NaN	23.2349	23.3629	23.0224	23.1115	23.4536	21.4841	22.9375	23.2676	22.1196	23.1182	23.2607	22.2757	23.1801	22.8335	23.7297				3	3	3	18.4	18.4	18.4	30.568	0	42.059	322780000	57
29.3465	29.8583	30.3624	29.5678	30.1875	30.2993	30.2527	30.1986	29.8465	29.6233	30.1763	29.6611	30.5111	30.3265	30.2075	29.7258	30.2503	30.2675	29.5688	30.4204	29.7541	30.2483	29.4509	29.8498	29.774	29.4364	30.248	30.2833	29.1221	30.4311	30.2286	29.1536	29.9795	29.7534	29.8383	29.7785				19	19	19	44.7	44.7	44.7	59.75	0	323.31	48667000000	1181
25.1297	21.9139	NaN	23.0042	NaN	22.281	22.5666	22.928	NaN	NaN	22.1471	NaN	NaN	NaN	NaN	NaN	NaN	22.3583	NaN	NaN	22.1441	NaN	23.3679	21.2989	NaN	NaN	NaN	NaN	23.9188	NaN	NaN	23.2195	NaN	NaN	21.8039	NaN				3	3	3	13.9	13.9	13.9	31.626	0	33.889	128290000	19
28.7799	27.9682	27.6824	28.0913	27.9101	28.1882	28.2748	28.6682	27.6524	28.0559	27.4364	27.8532	27.6535	27.6484	27.8045	27.3152	27.2732	28.138	28.4395	27.9395	27.0138	28.543	28.722	27.9612	28.5307	28.4962	27.0919	28.0453	28.6785	27.3577	27.629	28.4184	27.5438	27.697	28.1527	28.4068				9	9	9	54.4	54.4	54.4	29.555	0	146.09	11114000000	313
27.7925	27.0585	27.0605	26.4496	26.7913	27.2302	26.4669	28.003	26.971	27.0657	26.6845	26.8895	27.2743	26.1506	26.8513	26.3655	27.4411	27.1688	26.6913	27.2103	26.5911	26.8638	27.0209	27.7523	27.5491	27.3022	26.3111	26.9591	27.3523	26.1157	26.0761	27.0261	26.4165	26.8371	27.7377	26.9949				7	7	7	41.5	41.5	41.5	25.898	0	277.82	6155300000	384
27.6347	26.6935	26.3765	26.9664	27.3392	26.8022	27.013	27.2205	26.5322	26.3054	26.0312	26.0412	26.4857	26.0913	26.0751	25.8949	25.764	27.6508	26.9308	26.3452	26.7397	27.0478	26.9947	26.7425	27.2343	27.6129	25.5456	26.4123	27.3917	25.4131	25.9321	26.7291	25.5908	26.9095	26.9192	26.5553				5	5	5	24.6	24.6	24.6	27.647	0	183.25	5176300000	240
26.4331	26.0243	24.3936	26.3551	26.355	26.1214	25.4668	26.4701	25.3865	25.8994	25.4998	25.7848	25.987	25.0412	25.4453	25.9088	25.6537	26.0561	26.0158	25.7003	25.6603	26.082	26.1992	26.1301	25.7473	26.0983	25.5334	25.686	25.9394	25.1551	25.5319	26.0691	25.5068	25.6164	25.6118	25.2602				6	6	6	46.4	46.4	46.4	29.483	0	110.29	2510900000	168
22.1476	22.9216	21.4857	24.9259	25.1909	23.0438	22.8409	NaN	26.1695	22.8422	24.7579	26.4805	22.1	24.8035	21.3685	23.0802	23.4759	23.5312	22.5825	19.613	24.5812	24.025	22.3464	22.112	23.3226	20.4925	24.5057	21.3808	NaN	22.0515	24.0432	23.7573	25.2058	24.973	22.2361	28.1983				3	3	3	28.4	28.4	28.4	10.4	0	149.19	1380100000	136
NaN	NaN	NaN	NaN	NaN	NaN	NaN	NaN	NaN	NaN	21.554	19.8691	NaN	NaN	NaN	NaN	NaN	NaN	NaN	NaN	NaN	NaN	NaN	NaN	NaN	NaN	NaN	NaN	NaN	NaN	NaN	NaN	21.1515	NaN	NaN	NaN				4	4	4	5.2	5.2	5.2	172.12	0	8.0563	74805000	7
NaN	NaN	NaN	NaN	NaN	22.6405	NaN	NaN	23.6562	NaN	NaN	NaN	NaN	NaN	NaN	23.227	24.4933	NaN	NaN	NaN	NaN	NaN	NaN	NaN	NaN	NaN	21.4948	NaN	NaN	NaN	NaN	NaN	NaN	NaN	NaN	24.8629				5	5	5	18.9	18.9	18.9	41.975	0	25.665	88888000	18
29.8767	29.4933	30.1719	29.7314	29.6697	29.8398	29.2543	29.934	29.5001	30.1304	29.5923	29.9256	29.9212	29.5389	30.2286	29.3911	29.1481	29.5048	29.8434	29.9146	29.2697	29.8778	30.0453	29.6269	30.0488	30.3376	30.2152	29.8933	29.8383	29.6856	30.003	30.0037	29.5412	29.9033	29.5481	29.9241				21	21	14	37.3	37.3	25.5	67.819	0	323.31	41130000000	1407
24.9773	24.832	26.2366	25.0832	25.2652	25.6479	24.9881	24.7584	24.4783	25.5542	25.1107	25.3285	24.9663	NaN	25.6865	23.7734	24.3143	25.2903	25.5736	25.2557	24.896	25.7852	25.2095	25.3202	25.4266	25.4601	25.2546	25.6455	25.0225	25.5045	25.5664	25.4625	24.8821	25.4212	24.4826	24.7831				10	10	10	32.7	32.7	32.7	54.416	0	205.46	1591100000	183
22.1643	NaN	22.9124	22.8452	22.6274	22.9616	22.1311	22.0989	21.2699	22.5141	22.0668	22.1311	22.7012	21.9393	22.5869	21.9492	NaN	22.9936	22.8006	22.9192	21.9932	22.9649	NaN	23.4881	21.987	NaN	22.4398	22.4571	22.1604	22.5979	22.6179	22.0567	22.2411	22.3269	23.9599	22.055				4	4	4	3.3	3.3	3.3	184.82	0	13.154	207120000	86
25.1668	25.3811	26.2113	25.69	26.0515	25.401	24.0732	25.6171	24.7346	26.2493	25.4631	26.4654	25.3475	25.5283	26.153	25.5403	24.7219	25.8216	25.2651	26.0441	25.8819	25.858	26.6976	26.1443	25.5389	25.0854	26.2452	26.1715	25.8785	26.3346	26.3795	26.1653	26.0254	25.779	25.4709	24.2618				12	12	12	44.8	44.8	44.8	53.12	0	253.79	2608300000	288
27.6334	27.9682	29.0596	28.454	28.5763	28.1639	28.0059	28.1957	27.1614	28.3201	27.4406	27.8217	28.0813	28.4204	29.0471	27.1165	27.3402	28.0033	28.8446	28.6431	27.9946	28.693	28.2547	28.8198	28.3148	28.4069	28.1431	28.7346	28.1584	28.0795	28.612	28.5892	27.6687	28.4651	27.0763	28.1336				4	4	4	19	19	19	24.261	0	323.31	14715000000	172
23.7351	23.8973	23.8859	NaN	NaN	23.8572	NaN	23.7061	NaN	23.186	22.6106	NaN	23.5047	22.8726	23.789	23.4331	22.1433	24.7565	NaN	NaN	NaN	NaN	21.5101	NaN	NaN	NaN	NaN	24.4474	23.4675	22.6383	23.1587	24.0572	21.9363	23.7469	NaN	NaN				3	3	3	15.2	15.2	15.2	43.055	0	7.4954	327610000	18
29.2853	26.7468	29.0034	29.7237	29.6046	28.3167	29.1383	28.9006	28.8673	28.5336	28.798	28.7213	28.4699	29.3923	28.9352	28.4071	28.259	28.7031	28.4044	27.5917	28.2082	28.7547	28.1789	29.4358	28.3827	27.813	28.0428	28.5792	29.5685	27.6339	28.5179	29.0301	28.249	28.9329	26.9268	27.9054				4	4	4	54.5	54.5	54.5	11.728	0	26.518	16903000000	130
23.1528	NaN	NaN	NaN	NaN	24.1715	23.953	23.7111	23.1076	23.2215	23.9645	23.8271	22.9028	NaN	23.0709	NaN	NaN	NaN	NaN	NaN	23.3573	NaN	22.5088	23.0234	NaN	NaN	24.179	22.828	22.6094	23.7018	23.6778	21.2338	23.5743	23.2593	23.0907	22.8853				2	2	2	8.1	8.1	8.1	50.878	0.0002739	5.0304	264920000	14
28.3553	28.7177	28.9115	28.2718	28.5175	28.2083	28.1032	28.4868	28.0727	28.7738	28.1968	28.7641	28.3547	28.1702	29.2405	28.419	27.8759	27.646	28.0731	28.7996	28.9473	28.6526	28.5561	28.5651	28.6082	28.0226	28.6667	28.9426	28.7178	28.5732	28.4527	29.1378	28.3628	28.7536	28.4387	27.7624				13	13	12	45.6	45.6	44.1	57.221	0	323.31	17822000000	741
25.8957	25.6083	25.8488	26.3531	25.7867	26.4317	25.7103	25.8088	26.2558	26.2569	26.0654	26.2591	26.1708	25.896	26.1297	25.1829	25.3298	26.2185	25.9306	25.9949	25.5173	25.8183	26.2074	25.7643	26.0642	26.1463	26.1326	25.9997	26.0359	25.9301	25.9393	26.564	25.8139	26.2609	26.3439	26.3054				15	15	14	28.6	28.6	27.5	83.434	0	183.76	2623400000	318
26.5066	26.8152	27.2522	27.2597	27.3013	26.9168	26.7035	26.454	26.5413	26.9643	26.9623	27.2238	26.9311	26.3654	27.1637	26.5825	26.7079	26.6239	27.6369	27.2566	27.4802	27.3674	26.8521	26.8324	27.2862	27.8237	27.2745	27.1074	26.6983	27.3665	27.3959	27.5519	27.0762	27.33	26.413	27.0512				20	20	20	28.4	28.4	28.4	140.47	0	323.31	5656400000	398
27.6587	27.7799	27.5953	27.9857	27.233	27.8633	27.5128	27.6728	27.6362	28.0474	27.7615	27.8006	28.1309	27.4374	27.7398	27.3121	27.3229	27.6715	27.8802	27.7734	27.2674	27.0225	27.9859	28.0014	27.6345	28.1685	28.2486	27.7381	27.6118	27.6514	27.6169	27.8006	27.7466	27.9673	27.0712	28.3253				18	18	18	57.9	57.9	57.9	50.118	0	323.31	9771400000	361
23.1562	23.0364	23.8019	20.1906	NaN	23.862	24.6821	23.7608	23.5774	23.3899	24.4002	22.5601	24.0868	23.4806	24.0175	23.5647	25.3232	23.1783	23.4104	23.7932	23.7073	23.4499	23.0312	NaN	23.4401	22.273	24.1855	23.4893	23.768	23.8307	23.423	23.4759	23.9116	23.4594	23.8483	23.1148				5	5	5	49.3	49.3	49.3	15.649	0	13.752	573200000	101
26.9317	24.9219	26.3429	26.3137	25.9514	27.5796	27.9294	27.9222	27.2864	25.6806	26.509	26.4383	26.9496	26.4201	26.2392	25.4557	25.9461	27.0025	26.1362	27.3643	24.7894	26.3414	26.427	25.8422	26.1956	26.2291	26.8658	26.2602	27.1862	25.8354	26.7874	26.1571	26.3597	26.26	25.1129	27.8901				6	6	6	33.7	33.7	33.7	31.73	0	323.31	4485700000	217
NaN	NaN	NaN	NaN	NaN	23.8779	24.892	NaN	23.571	NaN	23.5477	NaN	NaN	24.201	21.1785	NaN	NaN	NaN	NaN	22.8984	NaN	NaN	NaN	NaN	NaN	NaN	22.6385	NaN	NaN	NaN	20.7645	NaN	NaN	NaN	23.0323	NaN				3	3	3	28.7	28.7	28.7	25.268	0.0066123	2.13	112280000	10
NaN	NaN	NaN	NaN	NaN	NaN	NaN	NaN	23.9121	21.8448	NaN	NaN	NaN	NaN	22.1993	22.1676	24.6558	NaN	NaN	21.4748	NaN	NaN	22.2377	NaN	22.8243	NaN	23.6422	NaN	20.3873	22.2674	NaN	20.7973	25.3625	22.3962	23.0964	22.1955				5	5	5	20.6	20.6	20.6	39.731	0	7.8919	191800000	24
22.0565	22.2626	NaN	NaN	NaN	23.3724	NaN	NaN	20.9937	22.981	22.6845	22.5598	20.15	21.0633	21.6043	NaN	NaN	NaN	NaN	22.034	22.4365	NaN	NaN	NaN	NaN	NaN	21.3302	22.383	20.9209	21.8566	21.8051	21.8999	22.5602	NaN	NaN	NaN				5	5	5	16.5	16.5	16.5	58.762	0	6.0344	105560000	16
27.7206	27.7433	25.7499	27.411	26.7549	26.819	25.7037	27.6588	27.0118	27.6183	27.5903	27.9887	26.8812	26.7225	26.4831	28.5896	27.5026	26.7624	26.9478	26.5624	26.7334	27.0941	27.9562	26.3534	26.734	27.412	27.3605	26.9371	27.8352	26.5431	27.0247	27.1424	26.6764	27.3847	28.4159	28.0329				13	9	9	59.6	49.8	49.8	27.764	0	323.31	8737400000	369
24.2378	24.3689	25.4818	23.968	NaN	21.1797	24.577	23.85	23.712	24.5097	23.5607	24.2193	23.9892	24.3696	23.7638	24.0974	22.9901	22.4301	24.6467	23.6114	23.3606	22.8375	25.3625	24.0559	24.5328	24.3143	23.5457	23.979	24.3474	24.55	24.7621	24.1853	23.792	23.695	23.3803	25.3668				8	7	7	36.1	32.2	32.2	43.135	0	13.507	704490000	32
NaN	NaN	23.7848	NaN	NaN	NaN	NaN	24.2533	NaN	NaN	NaN	NaN	NaN	NaN	NaN	NaN	24.3801	NaN	21.5786	22.4776	NaN	NaN	23.4462	24.0518	NaN	NaN	NaN	NaN	NaN	NaN	NaN	23.0971	NaN	NaN	NaN	NaN				4	3	3	31.5	31.5	31.5	16.891	0	198.7	132560000	20
NaN	NaN	21.1009	21.6452	22.0675	20.8435	NaN	NaN	NaN	NaN	NaN	NaN	NaN	NaN	NaN	NaN	21.5239	NaN	NaN	NaN	NaN	NaN	NaN	NaN	NaN	NaN	NaN	NaN	NaN	NaN	NaN	NaN	NaN	NaN	NaN	23.394				2	2	2	3.7	3.7	3.7	88.278	0.0043084	2.3963	21297000	6
26.572	26.6168	26.7566	26.9395	27.5107	26.5638	26.3295	26.8369	26.0746	27.0785	26.2645	26.6665	27.262	25.9986	26.9697	25.2518	26.2111	26.8775	27.1662	26.8954	26.2314	26.6886	27.0395	27.5579	26.8292	26.5353	26.8526	27.3876	26.3288	26.9429	26.4274	27.5901	26.5104	26.8758	26.5825	26.1736				4	4	4	24.3	24.3	24.3	24.604	0	279.49	5733900000	216
22.4088	23.7663	24.5207	23.9233	24.3344	23.5847	23.3687	24.2751	23.4669	24.6454	23.2867	24.3785	24.0108	22.2984	25.1325	24.4293	23.912	23.8594	24.1516	25.104	23.5716	24.1917	24.2297	23.1847	24.6577	24.6079	24.3836	24.7556	24.3125	24.7708	24.7668	25.0851	23.8334	22.9354	23.7564	22.7591				13	13	13	34.6	34.6	34.6	68.137	0	168.05	869880000	182
25.1637	25.8606	26.6709	25.5242	25.5383	26.5929	24.7539	26.1347	24.9787	26.0868	26.1483	25.7029	26.3177	25.6655	27.0852	26.4687	26.7953	25.0167	26.0914	26.6786	26.1135	26.2915	25.6957	25.1929	23.3009	25.3627	26.2771	26.2856	25.1446	26.5642	25.9855	26.2088	26.4051	25.5468	26.5714	24.8396				9	9	9	39.9	39.9	39.9	35.554	0	123.98	3215700000	195
22.3961	20.9601	NaN	NaN	NaN	NaN	NaN	22.2176	NaN	NaN	NaN	NaN	NaN	NaN	NaN	NaN	NaN	20.8313	NaN	NaN	NaN	NaN	NaN	NaN	24.1084	23.2306	NaN	NaN	22.0678	22.1566	23.5914	NaN	NaN	NaN	NaN	NaN				2	2	2	5.2	5.2	5.2	29.625	0.007957	1.9178	60976000	7
22.5708	22.7725	22.802	23.7171	NaN	22.547	23.1364	NaN	NaN	23.3116	22.5911	NaN	NaN	NaN	23.9173	22.6643	NaN	NaN	24.4532	23.4367	23.3204	23.3352	23.213	23.466	22.5779	22.935	23.1501	23.8	23.3892	23.1313	23.3472	24.3151	22.9697	21.8773	21.9421	NaN				3	3	3	13.1	13.1	13.1	30.518	0	8.5852	294810000	35
25.7138	26.375	26.0637	26.2214	26.7521	26.2588	25.5	25.6826	25.5935	25.9153	25.4718	26.4662	25.355	25.5329	25.6205	25.8577	26.3239	26.2532	26.2202	26.1185	25.9958	26.1869	26.3889	26.0875	26.4601	26.7543	25.9194	25.9118	25.6001	25.931	25.9752	26.2787	25.7447	26.2897	25.8832	27.3193				29	29	29	21.3	21.3	21.3	242.98	0	323.31	3118000000	462
28.5399	26.73	26.1474	28.1179	26.9787	27.9468	28.6014	28.1843	28.4975	27.6966	28.3474	27.7441	27.901	28.4861	27.5665	27.1355	26.8412	27.6212	26.9304	28.2118	27.7541	26.84	27.8671	27.506	27.3265	26.6726	28.366	27.4515	28.3416	27.8292	27.6481	27.5448	28.061	27.7818	28.1	28.115				11	11	11	48.4	48.4	48.4	48.141	0	323.31	12506000000	632
28.6878	27.4357	27.1154	27.5986	28.6178	28.1613	27.365	27.7621	27.9087	27.694	27.775	27.6683	27.4565	27.6784	27.5672	27.395	27.4105	28.168	27.7582	27.0903	27.7199	28.0348	27.6939	27.3995	27.923	28.2794	27.5186	27.1539	28.0567	26.992	27.545	27.9589	27.7599	28.0591	27.9773	28.4777				21	21	21	31.9	31.9	31.9	121	0	323.31	9390900000	404
26.7119	25.2453	27.2593	27.0085	26.5567	27.7844	27.6891	27.3456	27.4495	27.0668	27.6596	27.1534	27.1259	27.5962	26.9928	27.3615	26.989	26.8657	26.3235	27.5548	27.1784	26.7409	26.83	26.453	26.8899	25.7994	28.2933	27.2453	27.1909	27.4975	27.7887	26.6185	27.4159	26.914	27.4505	27.238				10	10	10	27.9	27.9	27.9	71.502	0	323.31	6948200000	380
23.7099	22.4434	24.3859	23.1095	24.3987	23.7548	23.6009	23.322	23.4357	23.4712	22.6677	24.1717	24.0194	23.2348	23.6647	23.6197	23.9144	22.9283	24.2227	24.4534	23.459	24.4371	23.3098	23.5806	24.234	25.2971	23.8144	23.669	23.9975	23.3928	23.4777	23.9445	23.1429	24.2555	23.7827	24.1585				8	8	7	17.8	17.8	16.3	83.597	0	14.781	576360000	87
NaN	NaN	NaN	NaN	NaN	NaN	NaN	NaN	NaN	NaN	NaN	NaN	NaN	NaN	NaN	NaN	19.3072	NaN	NaN	20.1407	NaN	20.4435	NaN	NaN	NaN	21.7243	NaN	NaN	NaN	NaN	NaN	NaN	NaN	NaN	NaN	NaN				2	2	2	7.8	7.8	7.8	67.386	0.00098522	3.2122	11650000	5
28.2728	27.2904	26.8872	27.4194	27.099	27.0919	NaN	27.8596	26.3832	26.6197	25.8291	26.7192	26.8167	26.1828	27.0898	26.0887	25.2617	28.0345	27.5182	26.3056	25.8727	27.0915	26.68	27.4474	26.8701	26.7042	25.7911	26.7681	27.6306	26.4647	26.3621	27.521	26.4359	27.0362	25.9811	27.031				8	8	8	48.9	48.9	48.9	29.769	0	289.14	4694000000	134
29.9073	29.1298	28.072	28.4003	29.6538	28.7756	28.8601	29.1283	28.2227	28.6256	28.2652	28.1024	28.6335	27.6894	27.6183	28.4655	26.689	29.6877	29.3954	28.3492	27.8971	29.0001	28.8322	29.4586	29.3763	29.956	26.3853	28.7106	29.8428	27.1022	27.264	28.7628	27.492	28.8274	29.0359	29.6276				6	6	6	34.9	34.9	34.9	22.328	0	323.31	22128000000	449
28.5366	27.0016	27.0242	27.722	28.0097	27.2093	27.529	28.1682	27.222	27.2663	26.6477	27.1059	27.5525	26.5042	26.9404	27.3106	26.5865	27.6632	27.9902	27.0388	27.4554	27.185	27.7033	27.5973	27.6824	28.0739	26.242	27.2052	28.3299	26.3496	26.4747	27.4473	26.9028	27.6774	28.2175	27.0605				6	6	6	44	44	44	26.411	0	275.85	8459000000	294
22.6082	21.4468	23.0765	NaN	NaN	22.2737	NaN	21.723	NaN	21.5033	22.0419	NaN	NaN	NaN	20.1131	21.943	21.4121	NaN	NaN	22.7793	22.1219	22.4321	22.9443	NaN	21.7021	22.5719	21.1552	22.5689	22.0773	20.0837	22.0339	NaN	NaN	22.77	21.7104	NaN				2	2	2	11.9	11.9	11.9	29.194	0	60.788	119170000	46
23.2587	22.9398	22.4481	23.2327	21.3939	NaN	22.6952	22.4104	NaN	22.8748	22.4301	21.9246	NaN	22.6287	23.3838	NaN	NaN	22.3184	23.2886	22.4089	23.2823	23.2607	23.0583	22.8021	22.3159	22.5372	NaN	23.2218	23.2011	23.1594	22.5408	22.6595	23.0573	22.8001	NaN	NaN				3	3	3	17.5	17.5	17.5	28.943	0	13.04	242700000	52
27.8575	26.9731	27.1168	26.7025	27.751	27.1632	27.3451	27.7533	26.7565	27.4361	26.9425	27.1192	27.715	26.1608	26.8593	26.8424	26.2861	27.6771	27.5083	26.8305	27.5476	27.083	27.4428	27.722	27.6146	27.3345	26.3339	27.1678	27.5644	26.1619	26.408	27.4788	26.768	27.1098	27.8763	27.1101				6	6	6	41.7	41.7	41.7	29.204	0	323.31	8772700000	537
24.4161	24.4952	NaN	25.6709	25.8659	24.342	25.2231	NaN	25.8557	24.4047	24.8853	24.6825	24.2072	25.5489	NaN	24.7882	25.3263	24.1235	25.0672	22.4299	24.0186	NaN	24.8219	24.4981	24.6216	23.0323	24.2158	24.2187	24.4089	24.1214	24.2323	NaN	23.802	25.0123	24.0593	26.2513				3	3	3	28.9	28.9	28.9	25.357	0	47.583	962520000	32
23.3237	21.6758	NaN	22.277	21.4382	22.819	NaN	22.8956	23.1058	22.5101	22.3896	23.7212	24.2628	22.688	23.1899	23.6048	24.1982	NaN	22.5435	22.2322	23.6762	22.998	NaN	23.1179	23.2295	23.4738	23.0224	23.0009	22.4241	22.8281	22.5367	23.3314	22.8991	23.0376	22.1175	NaN				3	2	2	23	16.2	16.2	22.644	0	156.85	312370000	69
NaN	NaN	22.5058	21.1319	21.5961	21.9602	21.6511	21.126	NaN	22.0774	21.4425	21.9061	21.9142	22.654	22.4347	22.3721	21.947	NaN	NaN	22.802	23.2627	NaN	NaN	NaN	21.8233	NaN	22.2391	NaN	NaN	22.0865	22.4438	21.1552	21.8808	21.9906	22.2174	NaN				3	3	3	10.2	10.2	10.2	62.725	0	11.513	122870000	42
NaN	23.0666	21.8081	20.5386	NaN	21.8753	NaN	NaN	NaN	NaN	NaN	NaN	NaN	NaN	NaN	NaN	22.677	NaN	20.1479	20.7931	NaN	NaN	21.4096	NaN	NaN	NaN	NaN	21.1857	NaN	20.9247	20.7363	NaN	NaN	NaN	NaN	22.4501				4	4	4	18.1	18.1	18.1	40.569	0	5.4099	57637000	11
NaN	NaN	24.2938	NaN	24.8756	NaN	NaN	NaN	NaN	NaN	22.4054	NaN	NaN	NaN	NaN	NaN	NaN	NaN	24.7864	NaN	NaN	NaN	NaN	24.0032	NaN	NaN	NaN	24.3108	NaN	NaN	22.9151	NaN	NaN	NaN	NaN	NaN				2	2	2	1.9	1.9	1.9	121.45	0.0068132	2.0964	299810000	10
NaN	NaN	NaN	23.1275	NaN	NaN	NaN	NaN	25.2752	22.7736	23.2544	22.6821	NaN	24.1536	NaN	NaN	23.9499	NaN	NaN	NaN	24.1318	NaN	NaN	NaN	NaN	NaN	23.7945	NaN	NaN	23.6856	NaN	NaN	24.5208	NaN	24.1139	NaN				4	4	4	19.2	19.2	19.2	46.944	0	12.481	224650000	19
25.2006	24.668	26.4902	25.2109	24.2084	26.0638	25.4603	25.6276	24.8438	25.7992	25.7677	25.358	26.2404	26.2013	26.5561	25.7165	26.2633	24.7569	24.5577	26.5232	25.5979	25.2964	24.1082	24.1491	24.4487	22.817	26.3729	26.5163	24.2777	26.9369	26.6676	25.1764	26.1681	25.7317	25.4237	23.504				12	12	12	32.3	32.3	32.3	67.524	0	323.31	2354900000	260
NaN	NaN	NaN	21.1317	NaN	NaN	NaN	NaN	NaN	NaN	NaN	NaN	NaN	NaN	NaN	NaN	NaN	NaN	NaN	NaN	NaN	NaN	NaN	NaN	NaN	NaN	NaN	NaN	NaN	NaN	NaN	NaN	NaN	NaN	NaN	NaN				5	5	5	6.1	6.1	6.1	123.63	0.0021226	2.678	9446900	6
27.0948	26.5003	26.5958	26.5633	26.5745	26.4192	26.3125	26.9698	26.6516	26.8071	26.7729	26.9071	26.9129	26.5657	26.6497	26.2187	26.2586	26.9218	26.7794	26.546	26.1802	25.9894	26.8986	27.0996	26.4589	26.7786	26.8758	26.9375	27.0351	26.5431	26.4975	27.0856	26.8125	26.3048	27.6398	26.3941				13	13	12	51.9	51.9	47.8	41.389	0	157.53	5052100000	275
26.4825	26.2379	27.2661	27.4077	26.6146	26.6786	27.7286	25.5341	27.5736	26.0539	26.8295	26.9041	26.914	26.9339	26.2106	25.7823	25.7889	25.6788	26.4183	25.541	25.9858	25.8737	26.0801	27.0072	26.2837	25.3557	25.9552	26.2419	25.5922	25.2518	25.7829	26.5757	26.2391	25.4996	26.8284	27.9222				8	8	8	36.9	36.9	36.9	24.01	0	150.45	3883600000	192
23.3869	23.1716	23.0103	23.1584	23.7325	24.4301	24.0644	23.8736	24.1044	21.7481	NaN	23.3574	23.8145	NaN	NaN	21.6157	NaN	23.5031	23.8073	22.8023	24.4393	22.9477	23.7289	23.3786	23.7062	NaN	22.6685	22.5164	24.4458	NaN	NaN	22.8377	NaN	NaN	21.5215	22.257				3	3	3	13.3	13.3	13.3	44.132	0.00027693	5.3022	346450000	32
29.9443	29.0251	28.5885	29.4376	29.1191	30.5423	29.9041	30.89	28.5296	29.1615	28.7185	29.4609	30.2554	28.9598	28.973	28.9441	27.8911	30.6738	29.0279	29.9955	28.5026	28.6892	29.5482	29.3483	28.7562	28.5574	28.7313	29.073	30.1012	28.7658	28.736	29.3069	28.5291	29.1345	29.5763	28.2242				20	20	20	62.1	62.1	62.1	52.771	0	323.31	31029000000	854
NaN	NaN	NaN	NaN	NaN	23.1804	21.673	22.7993	NaN	NaN	21.2281	NaN	22.3706	NaN	20.4766	NaN	NaN	21.3743	NaN	24.7328	NaN	NaN	20.7047	20.8772	NaN	NaN	20.1828	NaN	21.377	NaN	NaN	19.9967	NaN	21.2572	22.2478	NaN				4	4	4	18.8	18.8	18.8	32.401	0	8.2408	86470000	23
26.3701	NaN	NaN	25.2996	NaN	24.2895	25.6135	26.0696	23.2991	25.074	23.385	24.754	25.3994	NaN	24.1893	24.8364	NaN	25.2698	24.6078	25.1796	NaN	26.0095	25.3225	25.4149	25.0787	24.4178	21.34	25.4377	26.4062	23.4558	23.1528	24.7164	23.7973	25.3157	23.153	22.6247				4	4	4	15	15	15	34.328	0	36.554	1047100000	35
NaN	NaN	NaN	NaN	NaN	NaN	NaN	NaN	NaN	NaN	NaN	NaN	NaN	NaN	NaN	NaN	NaN	NaN	NaN	NaN	NaN	NaN	NaN	21.3781	NaN	NaN	NaN	NaN	NaN	NaN	NaN	NaN	NaN	19.4159	NaN	NaN				2	2	2	7.2	7.2	7.2	30.739	0.0051454	2.2588	4640200	4
20.8844	NaN	21.8949	21.6601	NaN	21.974	21.6112	21.1554	NaN	21.9366	21.2933	21.8543	21.6678	NaN	21.5602	NaN	NaN	21.7236	NaN	22.1075	21.1822	22.2205	21.7636	23.2704	21.6413	21.6383	22.0834	22.133	21.7132	NaN	21.8796	21.1012	21.5053	21.4076	21.6697	NaN				4	4	4	12.5	12.5	12.5	49.452	0	30	107160000	50
25.8173	25.397	25.0296	25.5246	25.9234	24.6171	25.3436	25.2497	25.5403	25.3955	24.9661	25.4374	25.3777	25.8327	25.3314	24.8188	24.086	25.5907	25.8872	25.4027	25.5291	25.7764	25.6152	25.1856	25.6144	26.5076	25.6112	25.244	25.4884	25.363	25.625	25.5962	25.2042	25.4572	24.9495	25.824				11	11	11	16.1	16.1	16.1	138.35	0	323.31	1740900000	213
26.8298	26.2477	26.4169	26.2612	26.5909	26.2289	25.8257	26.6878	25.7245	26.5993	25.8574	26.5275	26.2141	25.1963	26.3889	25.5873	25.3567	26.8586	26.8394	25.7772	25.168	27.2246	26.7674	26.6006	26.5476	27.3208	25.3763	26.4341	26.9466	25.9141	26.216	26.8894	25.5393	26.8021	25.5163	26.1324				7	7	7	31	31	31	30.188	0	210.43	3507400000	217
26.8868	28.3637	28.5075	27.5535	27.8235	27.1979	26.9614	27.8215	26.7235	27.8178	26.7083	26.9969	28.3319	26.6831	28.1705	27.6216	27.9163	27.5771	28.502	27.8555	27.5329	28.0808	27.6074	27.9173	28.1163	28.585	26.8162	28.1369	27.436	27.6308	27.2335	28.4623	27.0886	27.5757	26.9499	27.2592				18	18	18	47.1	47.1	47.1	67.56	0	323.31	9599400000	534
NaN	21.2926	21.3146	NaN	NaN	NaN	21.5279	21.576	NaN	21.7465	NaN	21.5766	21.6338	NaN	NaN	21.0501	NaN	21.6978	20.9031	20.5044	NaN	NaN	NaN	NaN	20.8065	20.5315	21.6275	21.3669	NaN	21.8544	21.6728	20.7792	21.6569	21.7819	NaN	NaN				5	5	4	17.5	17.5	14.7	46.668	0.00050916	3.6593	68093000	26
22.1065	23.3123	24.0571	NaN	NaN	NaN	23.3557	21.1898	22.0578	23.6631	23.2153	NaN	23.421	22.5604	23.6561	23.5462	22.3562	22.9778	NaN	23.4456	NaN	23.8726	23.0592	23.3872	22.8977	NaN	23.2227	21.8799	22.5415	23.7607	24.1897	23.3853	23.8998	NaN	NaN	22.8531				6	6	6	26	26	26	30.824	0	6.4841	321960000	38
NaN	NaN	22.6664	NaN	NaN	20.5499	NaN	21.8702	NaN	NaN	NaN	NaN	NaN	NaN	NaN	NaN	24.8449	NaN	NaN	NaN	23.2378	NaN	NaN	22.6016	20.7578	21.6518	NaN	NaN	NaN	NaN	NaN	NaN	22.7684	NaN	23.6548	26.0347				3	3	3	28.3	28.3	28.3	15.693	0	56.575	192900000	14
29.4571	29.2689	28.9901	29.4775	29.3016	29.6067	29.3337	29.6605	29.7817	29.2499	29.2842	29.826	29.7739	29.7532	29.7063	29.2549	29.1454	29.7137	29.251	29.5451	29.214	29.0357	29.6037	29.0659	29.3895	29.0945	29.4905	29.3311	29.4582	29.1616	29.5581	29.8165	29.3216	29.2948	29.4189	29.1151				18	18	18	50.7	50.7	50.7	67.877	0	323.31	33647000000	876
25.5335	25.2258	25.498	25.36	25.3904	25.1555	25.0613	24.5006	24.8704	24.6758	24.8959	24.9949	26.6308	24.285	24.5651	23.9996	24.5764	26.329	25.3235	25.8714	24.9361	25.4011	25.2734	26.2204	24.9676	25.0912	24.4995	25.4869	25.4537	24.6617	24.5864	25.5637	24.1561	25.1358	24.8459	24.7272				10	10	10	36.3	36.3	36.3	42.888	0	45.335	1613900000	99
20.9039	23.1096	18.3507	22.0102	24.895	NaN	NaN	28.4579	21.0139	NaN	21.5768	21.0233	NaN	NaN	23.2987	NaN	28.3773	24.0744	23.7904	24.9074	20.7938	NaN	26.0642	27.0301	23.7196	NaN	NaN	21.0989	NaN	NaN	NaN	NaN	23.4509	21.6824	24.2423	21.0952				14	14	7	46.7	46.7	26.4	44.564	0	323.31	1854100000	127
25.6661	26.4018	26.8977	26.6737	26.4235	26.5905	26.6687	26.7314	26.5557	26.4951	26.3205	26.4178	26.6649	26.5689	26.134	26.8379	26.1256	27.4458	26.9699	26.5171	25.9999	26.3882	26.9568	26.8395	27.1566	27.0036	26.3733	26.6788	27.3399	25.7683	26.5566	26.5221	26.0093	26.6108	24.9011	26.3284				17	17	6	32	32	12.1	97.55	0	70.24	4006100000	182
28.1064	29.7492	28.5354	29.223	28.7234	28.1049	27.731	27.6442	28.0277	28.3787	27.9108	28.3273	27.9803	27.9436	28.1027	29.1816	28.062	28.3408	29.0576	27.8369	27.8013	28.0661	28.5118	28.7805	27.9657	28.4625	28.2087	27.6587	28.4377	28.3665	28.2473	29.0305	28.0885	28.0787	28.0844	28.5237				8	8	8	42	42	42	31.121	0	323.31	15343000000	193
22.5776	NaN	23.2638	NaN	22.463	23.6584	NaN	23.1332	NaN	23.2694	NaN	NaN	22.8433	22.5083	24.2719	NaN	23.8957	NaN	NaN	26.1228	NaN	22.3754	22.2615	22.5813	22.7003	23.9651	21.7007	22.3305	22.1234	21.7078	NaN	NaN	NaN	23.0379	23.594	NaN				10	10	10	28	28	28	82.43	0	98.412	243150000	42
NaN	NaN	22.5383	21.7346	NaN	22.1168	22.3343	21.5529	22.0404	21.1354	21.8874	NaN	21.9944	23.1772	22.0342	NaN	22.4519	NaN	20.7863	NaN	21.9498	21.2787	NaN	NaN	NaN	NaN	22.18	22.1336	NaN	22.1139	22.2732	NaN	21.7853	21.1181	21.2929	NaN				4	4	4	13.5	13.5	13.5	61.719	0	40.141	98636000	27
26.4622	24.4406	25.5532	25.6068	24.7839	26.108	26.1957	26.3034	25.6628	25.4777	25.7353	25.5083	25.5156	26.0506	26.3716	25.1798	25.9182	25.8255	25.1698	25.6025	25.7818	25.148	25.4539	25.5139	25.3605	25.4877	25.6713	25.8332	25.8066	25.3876	25.7352	25.8056	25.3103	26.0057	25.777	25.9805				8	8	8	43.3	43.3	43.3	28.993	0	287.25	2558600000	192
29.1102	29.071	27.9269	28.4556	28.473	28.4971	28.141	28.6138	28.8191	28.4364	28.3676	28.5076	28.5891	28.5906	28.2351	27.9481	28.8937	28.6398	28.2971	27.8262	27.7965	28.7626	28.5954	28.5197	28.1756	28.5248	28.2389	28.9122	28.5872	28.2036	27.8702	28.5783	28.5354	27.9817	28.8252	28.8196				13	13	13	66.1	66.1	66.1	25.035	0	323.31	16845000000	599
26.5212	26.0106	26.3844	27.0889	26.4196	28.0114	28.8077	27.294	27.5844	26.3611	27.4825	26.2293	28.2201	28.1693	26.3895	26.7305	27.3663	27.0077	26.3712	26.5443	26.8504	26.3126	26.3632	26.767	26.7743	26.5737	26.345	27.3002	27.3853	26.6534	26.0293	26.2831	26.1573	26.3915	27.7992	26.4143				6	6	6	59.7	59.7	59.7	22.119	0	323.31	6165700000	315
28.7341	28.8902	28.9039	28.9638	28.5282	29.0353	28.7832	28.5715	29.114	28.648	28.8521	28.5102	28.9702	28.5304	28.5542	28.2335	28.3922	29.143	28.8655	28.0566	28.8921	28.9325	28.6748	28.915	28.4589	28.5318	28.3894	28.9344	28.9196	28.4192	28.3926	28.8875	28.8034	28.7208	28.5206	29.0133				9	9	9	73.5	73.5	73.5	17.031	0	323.31	20326000000	579
28.3148	27.8323	26.9404	28.0007	27.7436	27.2773	27.5306	25.7553	27.6264	26.9863	26.271	26.9642	27.5177	27.5917	26.9094	26.9472	26.9641	27.8861	26.9503	26.3873	27.4644	27.9916	27.2806	27.7918	27.2056	27.0825	25.547	28.0041	28.143	26.3537	26.5138	27.5298	26.2763	27.2462	27.407	27.3564				5	5	5	37.3	37.3	37.3	12.712	0	142.38	6845600000	195
22.7877	20.3194	22.7938	22.879	23.0114	22.5518	22.5239	22.1463	22.1107	23.2604	22.4234	22.4715	NaN	NaN	21.6805	NaN	NaN	22.6005	23.8141	21.7832	NaN	NaN	23.3669	23.0555	22.3536	NaN	NaN	22.8943	22.9694	22.1441	22.2302	22.4395	NaN	22.8561	21.8988	22.5073				3	3	3	60.7	60.7	60.7	9.6981	0	8.1048	197350000	38
27.8179	26.1772	27.1019	27.3266	26.4372	27.5144	27.6773	27.3525	26.7743	26.6895	27.0007	26.8099	27.2272	27.0637	27.0912	26.966	25.3192	26.8477	26.465	27.2533	26.2801	26.5274	26.7958	26.7099	26.1272	25.5925	26.9466	26.9272	26.8681	26.9121	26.9352	26.687	26.3293	26.6572	27.2641	26.1431				6	6	6	44.5	44.5	44.5	25.838	0	291.92	5012600000	248
29.6178	29.2442	29.0012	29.2908	29.379	28.674	28.805	28.9465	28.9179	28.6105	28.4772	28.2952	29.2111	29.1387	28.7994	27.9819	28.1862	29.3147	29.3997	28.6878	28.2441	29.4347	29.0197	29.3082	29.0467	28.5605	28.0805	28.9799	29.0171	27.8053	28.4285	28.6725	28.3713	28.8541	28.9467	29.136				6	6	6	45.5	45.5	45.5	17.818	0	323.31	19614000000	332
23.7089	NaN	25.5062	22.6721	22.2645	24.5293	23.9603	23.2087	22.6615	22.9555	23.4671	23.4948	23.8743	24.4195	24.8197	23.4948	25.6817	22.9986	22.4947	25.2267	24.2587	24.2222	NaN	21.8223	22.9341	20.2834	24.4983	24.816	21.571	24.6582	25.2238	21.9377	24.1534	22.0732	22.9963	NaN				5	5	5	29.7	29.7	29.7	31.387	0	40.931	757590000	104
25.9888	26.2323	25.9588	26.4269	26.186	26.2901	26.4178	26.4137	26.1639	26.2597	26.2774	26.9845	26.2757	26.6937	25.8704	25.3411	25.3722	26.0785	26.1563	25.8651	26.6323	26.4688	25.9232	26.2977	26.355	26.6914	26.2471	26.2421	25.615	25.9327	26.2215	26.4155	25.9733	26.0897	25.9943	27.0025				7	7	7	36	36	36	25.855	0	323.31	3131700000	178
28.4238	27.9581	27.8541	28.3134	27.4053	27.7253	28.198	28.4483	27.2877	28.5608	28.1644	27.9937	27.6403	27.4204	28.3251	27.2084	26.8373	28.4468	28.6166	27.8269	27.6217	28.13	28.5724	28.4304	28.003	28.1558	27.2733	28.5459	28.1518	28.1009	27.9407	28.7513	27.8866	28.2196	27.1568	26.6693				8	8	8	66.3	66.3	66.3	21.057	0	323.31	11096000000	301
28.8472	28.3643	28.471	28.3219	28.0115	29.3899	29.1355	29.6843	29.6821	28.5538	29.2038	28.8554	29.4243	30.0359	29.1015	29.1767	28.542	28.5076	28.1291	29.3263	28.6734	28.4454	28.5555	28.0175	28.6722	28.3428	29.939	28.7832	29.0427	28.8851	28.9527	28.348	29.2491	28.5595	29.7253	28.7837				13	13	13	29.5	29.5	29.5	56.782	0	323.31	23656000000	792
27.997	27.9744	27.864	27.7453	28.0174	27.6191	27.718	27.8425	27.4226	27.9022	27.5538	27.9922	27.7269	27.254	27.7349	26.9444	27.1979	27.8221	27.8773	27.7686	27.3689	28.1336	28.0196	27.795	28.0613	28.538	27.6651	27.7259	27.9276	27.6417	27.5237	28.2324	27.7434	28.3622	27.592	28.1116				17	17	12	45.8	45.8	31.9	65.308	0	323.31	11053000000	657
22.2158	21.678	NaN	22.1882	21.3053	21.4508	NaN	NaN	NaN	21.392	NaN	21.585	NaN	NaN	NaN	NaN	NaN	21.2158	22.3487	21.0959	NaN	21.4353	22.2083	21.8174	NaN	NaN	20.9017	21.3231	22.0811	21.0672	21.5818	21.7146	NaN	22.0804	NaN	21.8443				7	2	2	23.9	9.2	9.2	61.313	0	44.904	96745000	33
23.6094	NaN	22.5679	23.9262	24.1046	NaN	NaN	20.3391	NaN	23.3469	21.6187	23.7786	NaN	NaN	NaN	NaN	NaN	23.1323	23.7222	NaN	21.0384	24.8421	23.1386	23.2717	23.452	23.7172	NaN	22.4726	23.688	NaN	22.6793	23.8319	22.4679	24.5017	NaN	NaN				4	4	4	11.1	11.1	11.1	63.551	0	35.023	257500000	40
24.1219	24.1877	24.2684	NaN	24.4322	24.6795	24.0008	24.3629	23.8028	24.3022	23.8161	24.4891	24.169	22.7692	24.3781	23.2084	23.095	24.7159	24.4557	24.8588	22.5606	24.7846	24.6925	24.2149	23.6938	24.5694	24.403	23.9528	23.627	24.0566	24.5085	25.0001	23.5926	24.5275	24.302	24.1867				7	7	5	27.6	27.6	19.7	48.14	0	56.548	785780000	97
22.288	22.8341	23.849	22.3166	22.5274	23.9616	23.7715	NaN	21.6872	23.0908	22.7594	23.4377	23.384	22.6136	25.053	23.468	22.514	24.6963	22.5621	24.759	NaN	21.4802	22.2386	23.8336	22.7433	NaN	22.7042	24.4833	24.2351	22.9805	22.7281	NaN	22.9611	23.8884	NaN	NaN				7	6	6	25.6	21.7	21.7	50.438	0	113.35	460030000	100
24.0566	23.795	23.032	22.2808	23.9007	23.0619	23.4795	23.3877	22.0601	23.4418	23.3938	22.904	23.6573	23.7112	24.1484	NaN	22.0551	NaN	NaN	23.5536	22.7316	24.1159	23.2291	24.035	23.8714	23.9894	22.8237	24.6585	24.6423	23.5433	23.1758	22.8157	23.0857	23.1243	24.2775	NaN				7	7	7	41.5	41.5	41.5	32.837	0	16.491	421210000	64
24.6433	25.6411	24.9219	25.8857	25.4385	24.8916	24.7314	25.2604	25.0529	25.372	24.48	25.7757	24.8631	23.8147	25.0068	24.8563	24.9695	25.0493	25.0089	24.9335	25.54	25.1485	25.7049	25.8374	25.0987	25.0501	24.9894	24.875	25.4249	24.4259	24.8921	25.7476	24.7044	25.0908	25.2107	24.9247				9	9	8	27.6	27.6	26.1	50.097	0	191.94	1567000000	180
23.1736	NaN	NaN	NaN	22.9841	23.4316	22.9665	23.8557	22.8651	NaN	24.3083	23.9781	22.2163	23.3785	22.9614	NaN	NaN	23.2109	22.2493	NaN	23.5301	22.6601	NaN	22.4024	NaN	21.4658	22.3042	22.8138	NaN	22.0484	24.1784	22.9832	23.4539	23.1147	NaN	NaN				2	2	2	29	29	29	18.828	0	8.9494	284640000	38
24.4204	23.6677	25.5578	24.358	24.6731	24.0405	24.2951	22.8071	23.668	25.1179	23.6203	25.3667	23.8263	NaN	25.29	23.0763	NaN	24.1909	24.7555	24.7501	22.3818	24.8919	24.4294	24.0775	24.9903	24.8662	24.1476	24.6896	25.1366	24.2486	25.0949	24.6535	24.2071	24.6574	22.0139	25.108				12	12	12	43.2	43.2	43.2	54.889	0	24.376	870770000	127
NaN	NaN	22.1604	NaN	NaN	NaN	NaN	22.142	NaN	NaN	NaN	NaN	NaN	NaN	NaN	NaN	22.0252	NaN	NaN	NaN	NaN	21.4196	NaN	NaN	NaN	NaN	NaN	NaN	NaN	NaN	NaN	NaN	NaN	NaN	NaN	21.2614				4	4	4	4.1	4.1	4.1	156.78	0.00074497	3.3257	20351000	9
26.3389	25.7168	25.6639	27.4324	26.2218	25.8202	26.4702	26.7554	26.0759	26.2278	26.2003	26.1277	26.0499	26.5728	26.1234	25.3649	25.184	26.3391	26.9395	25.3819	26.7822	26.4837	27.0152	26.8021	25.4007	24.5277	25.6303	26.1755	25.4674	26.3386	26.2871	25.4024	25.9271	26.4123	25.3427	25.1689				9	9	9	47	47	47	21.676	0	323.31	3150700000	151
24.6127	24.882	23.2755	23.3724	NaN	22.9843	22.1954	22.9226	23.2467	22.6533	22.5773	23.6829	NaN	24.0519	25.842	NaN	NaN	23.923	23.2637	NaN	NaN	NaN	NaN	23.0848	22.8781	24.5831	NaN	25.0078	23.3373	22.7094	NaN	21.2634	NaN	NaN	23.7535	NaN				6	6	6	45	45	45	27.335	0	9.838	365990000	26
28.7732	27.3217	27.453	28.439	27.7316	28.4037	28.3067	28.7982	29.0111	27.9499	28.043	28.0984	28.7303	28.0871	28.0549	27.7057	27.1448	28.3097	27.857	28.3547	27.8292	27.8437	28.3021	27.766	28.0668	28.0565	28.0641	28.0672	28.9076	27.8872	27.7679	28.2257	28.0612	28.2359	28.7717	29.6646				12	11	11	43.5	40.9	40.9	42.741	0	323.31	13125000000	425
21.1712	24.9338	23.2904	21.8125	22.5608	22.8358	22.4303	22.0275	24.1292	21.9436	23.5186	21.7742	22.2852	22.4617	21.9745	25.6314	26.693	22.5363	NaN	22.541	22.9755	22.6994	NaN	21.9268	20.8805	NaN	25.9844	22.0177	NaN	22.1703	23.4164	20.9931	22.6706	22.1593	22.6323	NaN				8	8	8	23.6	23.6	23.6	57.206	0	50.923	690040000	76
NaN	NaN	24.0795	NaN	23.2607	23.1459	NaN	NaN	22.7946	23.7554	NaN	23.8298	22.9423	NaN	24.4749	NaN	NaN	23.2555	24.2671	23.6938	21.9136	24.1204	23.9909	23.4173	23.4394	22.7902	23.6393	23.8426	23.8435	24.1171	23.8564	23.7686	23.3164	23.3818	NaN	NaN				10	10	10	12.4	12.4	12.4	133.9	0	14.325	358300000	57
24.0019	24.7146	25.7791	24.0549	24.3895	25.2607	24.737	25.0293	24.4002	25.0572	25.423	25.1818	24.9951	24.6475	25.4836	25.2753	25.8844	24.8126	24.7662	25.9597	25.1434	24.897	24.1469	24.777	24.7124	24.4406	24.9172	25.5448	24.0759	25.534	24.5083	23.7843	24.8102	24.9625	25.2352	22.9172				9	9	9	31	31	31	72.691	0	314.52	1481300000	173
30.7087	30.7406	31.0712	30.5253	30.106	29.4323	29.6819	31.0258	30.016	31.2612	30.2728	30.5932	31.0723	29.8294	31.7133	30.4639	30.1135	30.2774	31.0476	30.8471	30.4971	31.4331	30.633	31.0215	31.0913	31.709	29.978	31.2045	31.1585	30.4965	30.2186	31.307	30.3062	31.367	30.3495	30.1918				14	14	14	43.6	43.6	43.6	51.026	0	323.31	77544000000	1542
26.8608	26.3613	26.1818	26.5637	26.4246	26.4103	26.313	26.511	26.1733	26.4241	26.4669	26.7436	26.3325	26.1337	26.6357	25.9063	25.6018	26.7321	26.7939	26.0094	25.6617	26.1613	26.8167	25.8456	26.254	26.8852	26.2256	26.4411	27.0514	26.3657	26.2253	26.9291	26.1812	26.3678	26.5529	27.0298				17	9	9	52.8	33.1	33.1	50.582	0	323.31	4077600000	254
26.1595	22.9819	24.5445	NaN	23.6524	24.944	23.4906	28.9422	25.8925	24.7798	25.878	NaN	24.4662	NaN	25.7534	NaN	28.2371	24.8271	25.4795	26.3877	25.0601	25.2068	26.949	27.4916	26.0206	NaN	23.852	24.3883	24.2302	23.2971	22.7765	21.4182	26.1471	23.6201	28.0529	NaN				9	9	4	78.2	78.2	31.7	11.471	0	159.9	2550800000	65
25.7442	25.8198	25.6122	26.5103	25.9285	26.331	26.0214	26.3377	25.361	26.1476	25.1404	26.1148	25.9228	25.8242	25.0251	25.1163	24.6984	26.6136	25.8347	25.9358	25.3512	26.2384	26.5806	25.9144	25.776	25.5273	25.994	25.6451	26.4722	25.7037	25.901	26.4284	25.5698	25.8267	25.5722	25.9686				7	7	7	23.5	23.5	23.5	43.66	0	81.254	2510300000	111
24.6743	23.897	23.6035	23.6711	24.6746	25.0174	24.6537	23.4512	22.6192	23.2094	22.9943	23.3914	22.9614	23.038	23.7916	22.6456	23.0084	24.8371	23.7634	23.7492	23.3894	24.5126	23.41	24.0973	22.7306	23.2604	22.8544	23.276	24.2115	24.1999	23.3748	22.9762	23.2902	23.9085	23.6067	23.6925				7	5	5	28.9	22	22	46.302	0	105.48	573140000	86
NaN	NaN	NaN	NaN	NaN	19.8364	NaN	NaN	NaN	NaN	NaN	NaN	NaN	NaN	NaN	NaN	20.6671	19.5648	NaN	19.375	NaN	NaN	NaN	NaN	22.1388	NaN	NaN	NaN	NaN	NaN	NaN	NaN	NaN	NaN	20.8032	NaN				3	3	3	3.9	3.9	3.9	116.04	0.00026688	4.4908	10848000	8
NaN	22.524	22.4804	24.2659	23.5573	23.3384	NaN	22.4045	NaN	22.8161	NaN	23.1856	23.3098	22.2599	22.1685	NaN	NaN	22.0441	22.737	NaN	22.2671	22.706	22.9186	23.6119	NaN	22.5688	22.8613	NaN	NaN	22.2323	NaN	22.8535	22.5989	22.5538	23.6553	24.0766				5	5	4	20.6	20.6	16.7	44.877	0	10.3	216840000	47
NaN	NaN	25.8161	17.9787	NaN	18.597	NaN	NaN	NaN	NaN	NaN	NaN	NaN	NaN	NaN	NaN	NaN	NaN	NaN	NaN	NaN	NaN	NaN	NaN	NaN	NaN	NaN	NaN	NaN	NaN	NaN	NaN	NaN	NaN	NaN	NaN				6	6	6	33.6	33.6	33.6	45.16	0	24.881	54482000	5
23.5403	24.7464	24.1063	24.5404	25.1607	24.3582	24.5546	24.9745	24.1024	24.6906	24.2944	24.9862	25.0066	24.2879	23.4715	23.7384	23.9368	24.421	24.4744	24.8394	23.4749	24.6169	25.116	24.0379	24.344	24.4418	25.2021	24.2508	24.0246	24.3975	24.842	24.8346	24.8761	24.3536	26.0655	24.6231				5	5	5	23.9	23.9	23.9	44.868	0	203.06	1101900000	129
24.4808	25.1984	26.4943	23.6544	24.7466	26.1761	26.2454	25.779	24.41	25.9138	25.6521	25.7671	25.7012	25.7952	26.1164	25.3659	26.3229	23.707	23.8381	26.8788	26.0202	25.5075	24.6463	24.9273	24.3719	23.6993	26.3311	26.5512	24.0299	26.4722	26.5159	24.4454	25.5696	25.1176	25.6912	NaN				10	10	10	33.8	33.8	33.8	52.645	0	226.86	2154700000	135
23.3151	21.9865	23.8343	NaN	NaN	23.3986	23.0391	23.5022	22.5766	21.8491	23.4322	22.6058	23.2031	23.9971	24.7901	23.5855	23.2441	22.4541	23.8987	23.4783	22.7498	22.1105	22.4906	23.2338	21.9616	21.5193	22.8424	23.8735	22.5962	23.1477	23.3464	22.3142	23.3635	22.9716	23.8543	22.3325				8	8	8	36.3	36.3	36.3	35.329	0	108.51	350000000	91
27.6383	27.7776	28.035	27.9207	27.8894	27.363	27.4313	27.4376	27.0322	27.869	27.244	27.988	27.2025	26.4378	27.939	27.1857	27.2862	27.5084	28.2035	27.8131	27.5683	27.9573	28.1862	27.5683	27.8222	28.1626	27.466	27.9392	27.5293	27.381	27.6288	28.2052	27.2829	27.8693	27.3614	28.1711				25	25	25	58.3	58.3	58.3	64.615	0	323.31	9508400000	704
27.8403	27.5416	28.0505	28.0072	27.5606	27.4167	27.9935	27.3271	27.6847	27.6832	26.7544	27.4285	27.0813	26.9082	27.3167	27.2376	26.6764	27.409	28.0991	27.3204	27.5098	27.7295	27.842	27.6905	27.5828	27.581	26.6508	28.1269	27.7687	27.1649	26.941	27.9335	26.9159	27.3503	28.1385	27.7471				4	4	4	25.6	25.6	25.6	31.525	0	293.06	7928800000	211
28.2596	28.8078	28.7069	29.0973	28.3339	28.336	28.3763	28.1653	27.6744	28.4272	27.9006	28.5555	27.8413	28.0926	29.0404	27.8067	27.9392	28.0663	28.9241	28.8196	28.265	28.3502	28.4361	29.1453	28.6666	28.2828	28.2804	28.4732	28.5193	28.3716	28.4515	28.9426	28.3029	28.5704	28.333	27.7983				11	11	8	38.1	38.1	27.6	49.229	0	323.31	15372000000	624
NaN	NaN	NaN	NaN	NaN	NaN	NaN	22.4741	NaN	NaN	NaN	NaN	NaN	NaN	NaN	NaN	22.8835	NaN	NaN	NaN	NaN	20.5581	21.0746	NaN	20.7996	20.6883	NaN	NaN	NaN	NaN	NaN	NaN	NaN	NaN	21.5756	NaN				5	5	5	21.1	21.1	21.1	27.679	0	29.182	35578000	7
29.2428	30.0761	28.2841	28.3084	28.1153	28.1472	28.3592	29.2852	28.3507	28.7101	28.5611	28.4883	28.8557	27.9444	28.4875	30.317	29.0138	28.7027	28.6016	28.5814	29.401	28.7114	28.7565	28.9969	29.1795	29.5202	27.8782	28.7314	29.3841	27.9469	27.8182	29.0178	28.1962	28.9671	29.084	29.285				14	8	8	67.2	46.3	46.3	27.85	0	323.31	24723000000	536
NaN	NaN	NaN	NaN	NaN	NaN	NaN	24.6451	NaN	NaN	NaN	NaN	NaN	NaN	NaN	NaN	26.1968	NaN	NaN	NaN	NaN	NaN	NaN	NaN	NaN	NaN	NaN	NaN	NaN	NaN	NaN	NaN	NaN	NaN	NaN	25.7402				8	5	5	47.6	41.5	41.5	27.774	0	150.23	374190000	12
26.5898	26.5359	26.452	27.0317	26.4856	26.1481	26.5992	26.5255	25.6109	26.4816	25.8027	26.9007	26.5253	26.3934	26.6722	25.8004	25.6625	26.6922	26.7384	26.3656	25.8217	26.4827	26.7717	26.572	26.3788	26.3258	26.5014	26.3421	26.1562	26.1507	26.4027	26.7053	26.04	26.4281	26.2013	26.8772				11	11	11	23.8	23.8	23.8	62.639	0	184.53	4335000000	372
27.5475	27.0668	26.1997	27.2834	26.6342	27.2978	27.364	27.5879	27.7846	26.5511	27.2548	26.5026	27.5696	27.4784	25.9558	28.1727	26.9591	26.6224	25.5444	26.3965	27.6822	26.1739	27.1882	26.9053	26.652	25.3829	26.8225	26.2225	26.9529	26.1692	25.9271	26.8204	26.9257	26.8019	27.3241	26.0664				4	4	4	56.2	56.2	56.2	11.74	0	323.31	9109600000	298
NaN	NaN	NaN	21.7967	NaN	NaN	NaN	NaN	24.1942	NaN	NaN	NaN	NaN	NaN	21.7146	NaN	NaN	NaN	NaN	NaN	NaN	NaN	NaN	NaN	NaN	21.1694	22.281	19.8732	NaN	NaN	NaN	NaN	NaN	20.5161	NaN	NaN				2	2	2	15.9	15.9	15.9	31.873	0	27.836	83958000	17
22.0155	24.8891	22.8798	26.9046	26.1649	23.5273	22.5551	NaN	28.5292	24.6287	26.4207	26.2709	22.899	26.3396	22.6139	26.236	25.6276	NaN	23.5111	NaN	25.6019	24.4136	23.6093	24.9542	25.8295	NaN	24.1178	23.9123	NaN	23.5398	24.4731	24.5206	25.4585	25.5098	26.4053	28.8749				3	2	2	12.3	9.7	9.7	38.153	0	89.945	1869200000	83
28.2552	28.266	28.5301	28.5944	28.6316	27.9348	27.8086	28.1729	27.8085	28.0348	28.1751	28.0053	27.8188	27.8647	28.467	27.5617	30.3591	28.5596	28.4416	28.04	28.0876	28.4818	28.2263	28.4926	28.3802	28.6101	27.3089	28.8243	28.2244	27.9131	27.8948	28.0616	28.1148	28.5336	27.697	27.3953				8	7	7	48.5	42.9	42.9	21.892	0	323.31	18988000000	385
NaN	NaN	NaN	NaN	NaN	NaN	NaN	NaN	20.7191	NaN	NaN	NaN	NaN	NaN	19.7301	NaN	NaN	NaN	NaN	21.2744	20.2996	20.4809	NaN	NaN	NaN	NaN	20.5057	NaN	NaN	NaN	NaN	NaN	NaN	NaN	20.642	NaN				2	2	2	3.6	3.6	3.6	44.391	0.00026062	4.0595	10096000	2
23.8214	21.1142	NaN	22.8732	NaN	24.0917	24.2318	24.3365	24.131	21.9339	23.672	22.9047	23.5761	22.7046	20.8748	22.6947	21.1332	24.3841	22.6878	22.6243	22.0157	NaN	NaN	22.8043	21.1634	NaN	NaN	21.6929	24.516	21.687	22.6676	22.6739	21.4233	22.4097	22.4803	NaN				3	2	2	10.9	5.7	5.7	57.488	0	6.3038	300210000	33
21.2293	NaN	NaN	NaN	NaN	NaN	NaN	NaN	23.6237	NaN	NaN	21.4341	NaN	21.4482	NaN	NaN	NaN	NaN	NaN	NaN	NaN	NaN	NaN	NaN	NaN	NaN	21.2993	NaN	NaN	NaN	NaN	NaN	20.6608	NaN	NaN	NaN				3	3	3	39.7	39.7	39.7	16.185	0	7.3082	28169000	5
28.136	26.1157	26.7881	26.5319	26.4147	28.6669	27.6173	29.4364	25.8263	26.3063	24.6639	26.7638	28.0341	22.9937	27.2456	25.8063	25.5625	28.2599	26.4853	29.0034	25.6769	25.6892	27.6621	27.5819	26.7919	26.9087	25.727	26.9778	29.0606	26.0309	26.7001	27.2818	25.7291	26.392	26.8259	24.8396				21	21	14	49.8	49.8	35	67.93	0	323.31	7677800000	325
26.2774	24.0923	25.0189	25.5945	26.104	26.0097	25.5617	26.7836	24.1755	25.4216	24.519	25.9096	25.7465	23.564	24.8298	24.2768	24.4432	26.7596	25.1485	25.8991	24.5972	25.8884	26.1613	25.3935	24.9435	25.4643	24.6824	25.1012	26.3629	24.9494	25.3272	25.8271	24.6046	25.445	24.5738	24.3825				13	10	9	38.1	32.8	29.6	67.208	0	168.01	1936800000	184
NaN	23.2604	22.851	22.9193	23.4029	22.1236	NaN	22.4337	22.235	22.9936	22.579	22.9325	22.579	22.616	23.2277	NaN	21.6372	23.1547	23.4785	22.3354	22.5198	23.2577	22.6174	22.2849	23.6698	23.403	22.4723	23.4526	23.4558	23.5128	23.2092	23.7787	22.5977	23.8005	NaN	NaN				5	5	5	13.6	13.6	13.6	64.928	0	47.399	293130000	44
NaN	NaN	21.7905	NaN	NaN	NaN	NaN	NaN	NaN	NaN	NaN	NaN	NaN	NaN	NaN	NaN	24.5111	NaN	NaN	NaN	NaN	NaN	NaN	NaN	NaN	22.4482	NaN	NaN	NaN	NaN	NaN	NaN	NaN	NaN	NaN	NaN				2	2	2	2.6	2.6	2.6	107.53	0.0019134	2.833	62377000	2
26.5131	26.8007	26.7976	26.7149	27.4777	25.1065	25.6059	25.5508	26.1668	26.3656	25.7968	26.3034	25.0926	25.1864	25.5093	26.2729	25.5357	26.4353	27.0805	24.9653	26.0495	27.0298	26.5604	26.2331	26.6946	27.3136	24.7287	26.2477	26.7226	25.8535	25.5008	26.5945	25.1136	26.8323	25.1094	27.1051				6	6	6	14.4	14.4	14.4	59.54	0	115.46	3214300000	169
27.5278	26.4338	27.0971	26.8025	26.5473	26.8582	26.404	26.8388	27.0639	26.6106	26.7085	25.9808	26.8288	26.5159	26.6726	25.9805	25.2066	26.8934	27.0075	26.6783	25.5979	26.6065	26.8102	27.4297	27.0157	27.3215	26.4556	26.9432	26.8561	26.4115	25.2924	26.8098	26.3706	26.7052	27.6166	27.8964				7	7	7	49.5	49.5	49.5	21.863	0	323.31	4591400000	151
24.1898	NaN	24.1939	24.0804	23.1029	26.4018	26.2414	24.7369	25.9602	23.9557	24.4544	23.186	26.0397	24.4687	25.2175	23.3931	24.1475	24.4394	23.3163	26.0649	23.5059	22.7802	23.758	22.6763	23.535	NaN	25.249	23.7584	25.1404	24.1749	24.9721	23.2365	24.0266	24.6853	24.9834	24.8962				11	11	11	18.9	18.9	18.9	76.87	0	59.046	1007300000	111
22.0581	23.3005	22.724	22.9393	22.9296	23.2908	23.0302	24.0449	23.7342	24.3014	23.4805	24.3471	23.4422	23.3348	24.0663	25.2615	23.1577	24.2025	22.5194	24.6218	24.0988	23.6237	24.1298	22.8646	24.1067	23.9934	25.3644	23.8584	23.6919	23.9827	24.5047	23.7695	24.3471	22.5462	23.749	22.3325				10	10	8	15	15	11.9	109.68	0	208.17	664540000	107
25.4469	26.2495	25.5644	25.855	26.0191	25.5451	26.2563	25.3921	25.3032	25.3818	25.5999	25.6418	25.407	25.2979	25.379	26.1603	25.5048	25.5225	26.0607	25.3188	25.946	25.6743	26.0699	26.2521	25.3575	25.6517	25.1528	25.5767	25.8886	25.6706	25.4748	25.7692	25.1144	25.8043	25.6376	25.9971				10	10	4	28.2	28.2	12	59.251	0	314.58	2277100000	224
28.4058	27.7284	27.0386	27.6772	28.2687	25.8464	26.1224	27.6693	26.2068	27.9219	27.3315	28.2553	26.6346	26.7556	27.3714	27.1221	26.8427	27.5777	28.1419	26.8574	28.0214	28.1979	28.3247	27.6787	27.6947	28.4799	26.8891	27.7833	27.8132	27.275	27.3908	28.6225	27.2069	27.822	28.257	27.6771				10	10	10	59.6	59.6	59.6	37.191	0	323.31	8588300000	255
25.1759	25.3449	25.0469	26.0072	24.9208	24.9865	25.1553	24.6793	23.9994	25.5587	24.4942	24.792	24.8868	23.9429	24.2463	24.5097	23.4406	25.3852	25.0193	25.0403	23.551	24.9293	26.0846	25.584	24.3757	24.0811	24.3337	24.7661	24.4556	24.7578	24.0206	25.1598	24.2973	22.0724	26.0168	25.7598				4	4	4	35.4	35.4	35.4	17.748	0	277.74	1332200000	104
NaN	NaN	NaN	NaN	22.0383	NaN	NaN	NaN	NaN	NaN	NaN	NaN	NaN	NaN	NaN	22.8005	22.4132	NaN	NaN	NaN	NaN	21.8147	NaN	NaN	NaN	NaN	NaN	NaN	NaN	NaN	NaN	NaN	NaN	NaN	21.8092	NaN				3	3	3	3.9	3.9	3.9	158.95	0	136.73	38611000	3
22.9802	23.0994	23.2603	24.9461	24.0809	23.6769	23.5192	23.2852	20.5842	24.7505	22.9948	24.2694	23.8088	21.0174	22.7898	22.6805	21.2838	23.2388	23.6985	24.6969	23.8773	24.0617	25.2022	23.4319	23.9668	22.9568	24.1723	23.2432	22.979	24.1522	23.5878	24.2851	23.3805	23.4584	24.298	23.9263				12	12	12	19.6	19.6	19.6	96.557	0	240.66	569280000	135
NaN	23.4439	23.7694	24.0713	22.4879	24.0672	22.7739	23.7748	NaN	25.5133	22.9164	24.4246	23.3479	22.7516	NaN	21.9461	23.8049	21.7907	23.4985	24.093	24.5267	24.2113	24.8206	NaN	23.0769	23.8285	NaN	23.4475	22.4855	23.828	23.7565	24.2075	24.4278	23.988	24.7701	23.7556				9	9	9	19.9	19.9	19.9	82.285	0	68.068	568810000	51
23.6771	25.8628	24.8087	25.4013	25.0271	24.8743	24.2879	24.3691	23.4018	25.3337	23.856	25.3751	24.5669	23.8277	24.2859	25.6077	23.9125	NaN	25.3974	25.7746	24.7421	24.9238	25.7894	24.9731	25.2723	24.4412	24.3678	24.56	24.3551	24.8853	24.9259	24.8396	24.6799	25.2609	25.408	25.2881				13	13	13	25.9	25.9	25.9	81.307	0	145.46	1190400000	155
22.6678	22.3915	NaN	22.8818	22.9164	21.9324	22.2766	NaN	24.0098	22.2719	22.9418	22.3628	22.1522	23.8288	NaN	22.9069	22.5034	21.9462	NaN	NaN	22.684	NaN	22.081	NaN	22.6531	NaN	22.1689	22.5126	22.0904	21.5967	NaN	21.9981	21.7024	21.7388	22.484	22.4725				4	4	4	12.5	12.5	12.5	58.025	0	37.976	181450000	38
20.2926	22.3207	NaN	23.2767	NaN	22.5291	NaN	NaN	NaN	21.865	NaN	NaN	22.5314	NaN	23.1393	21.6287	NaN	22.2352	22.8333	NaN	NaN	NaN	21.8106	22.907	22.632	22.3613	NaN	22.8062	22.8001	NaN	NaN	NaN	NaN	NaN	NaN	22.0677				5	4	4	23.5	19.4	19.4	37.672	0	6.8019	104750000	24
22.8352	24.7204	24.8232	22.3305	23.672	24.2452	24.3947	23.462	21.8079	24.8611	24.5568	24.4073	24.3796	24.8419	25.669	23.7456	23.7213	NaN	22.2698	25.7633	24.2289	23.8371	23.7392	23.7064	23.5513	23.0697	25.7331	25.156	20.3442	26.1084	25.3081	23.9739	25.0626	23.8633	24.2361	25.6505				11	11	10	38.1	38.1	35.2	53.454	0	156.83	966990000	125
23.8581	22.3891	22.2475	23.3526	23.2775	22.8573	NaN	22.3725	23.1805	22.4248	23.2785	23.1695	23.3426	23.3149	22.0365	23.0687	22.7476	23.4173	22.9317	22.9598	22.9198	23.0632	22.9402	22.6654	22.9652	23.2499	22.5149	23.0278	22.9811	22.3207	22.8928	23.231	22.4561	23.4725	22.6851	23.7919				3	3	3	11.6	11.6	11.6	48.666	0	13.493	311650000	58
22.5385	24.5833	NaN	22.5477	24.2328	NaN	22.047	23.9911	22.1173	24.4608	22.8573	25.2193	22.5762	21.8833	24.7792	23.6798	21.1817	23.3657	23.6012	23.6934	NaN	25.3659	23.9456	24.5433	24.2978	25.7439	NaN	23.935	24.5918	23.4953	24.5298	24.8517	22.9205	25.1497	NaN	NaN				10	10	10	27.7	27.7	27.7	62.615	0	323.31	809210000	90
27.6615	27.4759	27.2114	27.5155	27.5126	27.3396	27.4461	27.7048	26.8433	27.539	26.9912	27.6977	27.4336	26.7631	27.6308	27.4497	27.2347	27.5717	27.6215	27.4601	27.0675	27.3105	27.849	26.9978	27.3044	27.5134	27.4425	27.2867	27.294	27.1568	27.4023	27.6559	27.1123	27.4385	27.4201	27.509				22	22	20	40	40	36.4	94.33	0	323.31	7160800000	450
NaN	22.0272	21.9545	22.6969	22.5106	22.1391	22.5059	22.1712	22.5345	22.507	21.9308	22.5725	22.0262	21.5607	22.5399	NaN	22.1164	23.0767	22.7047	21.7863	22.1843	NaN	21.9338	22.3812	22.7586	22.4735	22.3044	22.4825	22.2635	22.1884	22.0251	23.0698	22.4601	22.3241	22.09	22.5376				5	5	5	19.4	19.4	19.4	46.655	0	33.261	215930000	61
NaN	22.7368	23.4255	22.6038	NaN	24.0172	NaN	NaN	23.8743	23.6401	23.9443	23.568	24.4331	24.1348	24.2199	NaN	25.2917	NaN	22.4601	23.1087	25.2726	22.9036	NaN	NaN	23.5621	NaN	25.4565	23.597	NaN	24.3056	25.1382	22.6345	24.6012	NaN	23.1839	23.0746				9	9	9	19.4	19.4	19.4	100.07	0	105.13	581410000	51
NaN	NaN	NaN	NaN	NaN	NaN	NaN	NaN	22.4385	22.2722	21.8634	NaN	NaN	21.28	22.0195	NaN	22.1205	NaN	NaN	NaN	24.223	NaN	NaN	NaN	NaN	NaN	22.2998	21.4011	NaN	23.0667	22.5744	NaN	21.6939	NaN	NaN	NaN				9	6	6	18.3	15.1	15.1	85.496	0	7.1729	93005000	15
27.6817	28.3864	28.5021	28.0416	27.9146	28.167	28.7666	28.0134	27.6656	27.9242	28.3212	27.9854	28.316	28.1458	28.4522	28.0618	27.877	28.0622	27.9507	28.4248	27.5308	27.9008	27.5135	27.864	27.6025	27.5249	28.3533	28.4745	27.3706	28.6942	28.5512	27.6995	28.0164	28.032	27.9229	27.8976				12	12	12	68.4	68.4	68.4	29.804	0	323.31	11511000000	372
23.477	24.9652	24.9396	24.0988	24.6787	22.4171	22.392	22.3627	NaN	23.7245	23.0056	24.2323	22.426	NaN	23.7094	25.2231	24.2535	23.8707	24.2945	23.6443	24.008	24.1589	24.2249	24.0756	23.8099	25.2605	23.1533	23.6887	23.6532	23.684	23.6235	24.4588	23.262	24.0199	23.3762	23.3745				4	4	3	15.3	15.3	13.1	40.529	0	83.44	649280000	76
27.1729	26.5441	27.2453	27.0254	27.4989	27.7247	26.953	27.4457	27.6728	26.7623	26.4443	26.6665	26.8307	27.3501	26.455	26.6103	26.6617	26.8551	26.814	26.6503	27.075	26.6253	27.0483	26.6895	27.2623	26.8209	26.462	27.2608	27.278	26.4092	26.6514	26.7391	26.3386	26.6975	27.3667	27.4059				16	16	16	61.4	61.4	61.4	42.621	0	256.99	5265900000	354
23.7708	22.543	23.7831	23.7123	NaN	24.8707	23.7478	23.1468	23.1378	23.9345	24.0989	23.8605	23.9501	24.0455	23.7272	23.9983	23.6154	23.3643	23.2869	24.5331	25.286	23.4031	23.4467	23.3435	23.3507	NaN	23.89	23.0155	24.0277	23.1278	24.2889	23.4524	23.8003	22.8548	24.4156	23.4588				13	6	6	28.8	17.2	17.2	68.563	0	113.58	613000000	69
26.8071	26.5898	26.077	26.0597	26.3307	25.51	26.0737	25.872	24.5831	25.8085	25.5582	25.6529	25.6368	25.349	25.6374	25.563	25.1469	26.0594	26.4744	24.9933	25.9969	26.1856	25.4969	26.6072	25.9875	26.5316	24.8795	26.2905	26.3553	25.1864	25.1474	26.4975	25.3758	25.8684	25.4797	25.9658				6	6	6	78.5	78.5	78.5	13.569	0	127.33	2740600000	192
NaN	NaN	22.9711	21.4364	22.576	22.2109	NaN	NaN	NaN	22.2917	22.12	22.6638	21.766	NaN	22.1432	NaN	NaN	21.7642	21.7763	21.9209	21.7657	21.6847	21.7248	NaN	21.8579	22.7844	22.0138	22.1978	21.7725	NaN	21.9399	22.2868	23.3876	21.9888	NaN	21.0063				5	5	5	19.6	19.6	19.6	39.681	0.00027755	5.3504	132360000	27
27.8289	28.4322	28.4294	28.6216	28.713	27.9383	28.4169	28.3937	27.1202	28.2343	27.6495	27.621	28.1763	27.956	28.2864	26.6189	27.9545	28.5122	28.7157	27.7514	28.1067	28.024	28.4767	28.3482	27.6186	28.1514	27.6217	28.5636	28.2948	27.5472	27.8562	28.4715	27.6967	28.2596	28.4614	27.9764				4	4	4	50.8	50.8	50.8	14.787	0	323.31	12228000000	249
22.1542	22.5833	22.9392	23.4442	23.0687	22.5909	22.6319	22.528	NaN	22.7067	NaN	NaN	NaN	22.404	23.6989	21.7065	NaN	23.6689	23.1682	23.3229	22.651	23.0465	23.1885	NaN	22.6546	NaN	22.4647	22.5894	23.206	22.2768	22.9367	23.0113	NaN	22.3525	NaN	NaN				4	4	4	11.2	11.2	11.2	58.24	0	38.987	241350000	35
23.8576	24.9271	23.3752	23.7976	23.5432	24.3945	25.0113	23.0422	24.3682	22.8087	24.3817	24.6762	23.9626	24.4452	22.2286	23.9164	24.7336	23.6989	23.3286	23.207	23.3817	23.5486	23.2115	23.1387	23.5664	22.0725	23.2134	23.2643	23.7537	22.8959	22.6385	22.909	23.4184	22.3312	23.0334	25.8212				5	5	5	31.4	31.4	31.4	28.048	0	144.88	822550000	111
NaN	NaN	NaN	NaN	NaN	NaN	NaN	NaN	23.763	21.8057	22.0413	21.8623	20.4828	23.0875	NaN	NaN	23.2552	NaN	NaN	NaN	22.1048	19.8442	NaN	NaN	NaN	NaN	25.9442	NaN	20.3954	23.5739	NaN	NaN	24.5866	NaN	NaN	NaN				5	5	5	6.8	6.8	6.8	129.99	0	313.47	180350000	15
NaN	NaN	22.3255	NaN	NaN	NaN	NaN	NaN	22.1715	20.3749	NaN	NaN	NaN	NaN	NaN	NaN	23.334	NaN	NaN	NaN	21.7402	NaN	NaN	NaN	NaN	NaN	NaN	NaN	NaN	21.9955	21.9816	NaN	22.981	NaN	NaN	NaN				5	4	3	11	9.4	8	105.87	0	8.2865	54522000	12
20.8303	18.8766	20.5954	NaN	NaN	NaN	NaN	NaN	NaN	NaN	NaN	NaN	NaN	21.0141	NaN	NaN	NaN	21.0209	NaN	NaN	NaN	NaN	NaN	NaN	NaN	NaN	NaN	21.9721	NaN	NaN	NaN	NaN	NaN	NaN	NaN	20.1771				2	2	2	5.1	5.1	5.1	72.669	0	5.448	14922000	8
26.2505	27.0257	28.6608	26.8007	26.6369	28.9837	28.5559	27.5124	29.514	29.6897	29.2248	28.7659	28.1424	28.8115	28.9101	30.1011	28.9122	27.6823	27.9411	28.2533	29.2081	28.2211	26.833	25.3198	28.4119	27.3174	29.1578	27.7059	27.6929	30.3224	30.0176	25.433	29.8685	29.7	27.5254	24.079				31	31	31	18	18	18	312.3	0	323.31	20024000000	665
23.1195	23.2901	24.5843	23.4963	21.8559	22.484	NaN	21.6802	23.8214	24.5231	22.4529	23.7373	22.5171	NaN	24.9494	23.5939	23.3991	NaN	24.2022	24.9369	21.8271	23.3144	23.599	22.6405	24.621	24.8846	23.0065	23.8734	23.6605	24.9215	24.3811	24.6068	23.8435	24.7591	21.3219	22.731				17	17	17	16	16	16	174.76	0	70.413	537760000	108
30.73	31.3986	31.4532	31.2297	31.4926	30.7695	30.5979	31.0197	31.0207	31.5143	30.9009	31.5438	30.7239	31.3935	31.6933	31.3297	31.6672	31.1284	31.39	31.4352	31.3727	31.3472	31.3422	30.7782	31.7296	32.0106	32.2077	31.3114	31.338	31.5935	31.6918	31.6659	31.5852	31.432	30.9426	31.5027				67	67	59	39.1	39.1	34.7	226.53	0	323.31	129630000000	2949
NaN	23.3441	21.9464	NaN	21.7489	25.0877	NaN	NaN	25.0572	24.2792	24.5112	24.5793	20.3502	26.3047	25.9436	21.9691	26.1134	21.2754	22.9723	24.4488	25.259	NaN	NaN	NaN	24.8643	22.4286	26.8598	24.841	NaN	26.5637	26.1237	22.1895	26.2597	NaN	22.0792	NaN				26	16	16	20.8	14.7	14.7	229	0	323.31	1115400000	144
23.8925	25.7221	26.0424	25.0374	26.2929	26.3591	26.0148	25.8662	25.9401	25.9268	25.9048	25.1041	25.9352	26.7922	26.3333	25.4969	26.2188	25.8497	25.6317	26.4794	26.2806	26.1528	25.8817	25.3952	26.1181	25.7762	26.8711	25.7993	25.5224	25.867	26.5249	25.4422	26.2605	25.9809	25.9151	26.1954				16	16	16	30.2	30.2	30.2	99.045	0	323.31	2635300000	226
NaN	NaN	29.4179	NaN	NaN	NaN	NaN	NaN	NaN	NaN	NaN	NaN	NaN	NaN	NaN	NaN	NaN	NaN	20.4333	NaN	NaN	NaN	NaN	NaN	NaN	NaN	NaN	NaN	NaN	NaN	NaN	NaN	NaN	NaN	20.5752	NaN				29	19	18	43.1	30.8	29.6	103.85	0	124.14	684910000	34
23.4269	24.4331	25.1022	24.7079	25.0404	24.5039	23.9044	22.0207	24.1601	25.2616	24.3674	24.9386	24.253	24.5689	25.9764	24.3729	24.9436	26.5076	24.9208	25.2996	24.8446	25.0273	23.9197	23.9027	25.0242	25.4561	25.0589	24.9557	23.245	25.401	25.7975	24.7467	24.9513	25.4196	24.3287	24.8518				9	9	9	26	26	26	69.984	0	64.142	1332200000	131
24.9552	21.9317	21.3679	24.682	24.0325	24.4142	NaN	NaN	24.7539	23.4473	23.4671	24.3945	23.515	23.9653	22.1673	23.1104	23.1083	24.8563	23.5335	23.5142	23.122	22.8013	23.6645	NaN	23.9635	24.339	24.002	22.826	24.0893	23.5306	23.7805	23.9008	23.9795	24.2799	24.8097	NaN				4	4	4	35.6	35.6	35.6	22.764	0	16.87	498650000	52
25.6765	25.6272	24.438	25.8083	25.2997	24.5112	25.2713	25.2045	24.7978	24.6953	24.4126	25.362	NaN	NaN	25.1465	22.5946	24.3567	24.8441	25.5674	24.9741	24.3348	22.7782	25.7741	25.643	25.1708	23.9128	25.2299	24.9455	25.3272	23.4624	25.1456	25.2436	23.8315	25.7573	24.9653	23.5063				5	5	4	14.3	14.3	14.3	53.354	0	21.994	1429500000	85
23.5116	NaN	23.8998	23.027	23.7462	23.383	23.0685	22.3235	22.563	23.3551	22.6405	23.652	22.9833	24.1551	23.0839	23.1809	23.12	22.7523	22.6475	23.5988	NaN	24.0845	22.172	23.1853	23.4783	NaN	22.8653	22.2756	23.3782	23.3553	23.5267	23.6169	22.9287	23.4744	22.946	23.0116				11	11	11	10.3	10.3	10.3	215.4	0	37.561	372200000	52
22.5701	22.1466	24.4875	22.8357	22.3272	23.6025	23.5561	23.3696	22.5284	23.875	23.4418	24.0575	23.646	23.207	25.0854	24.1077	22.5703	22.2152	22.8387	23.9339	22.8297	24.2	22.9563	22.8222	NaN	NaN	22.9168	24.6303	22.9725	23.2237	24.3568	23.3518	23.5602	23.8202	22.7386	NaN				5	5	5	15.5	15.5	15.5	42.674	0	19.984	456500000	59
22.7182	23.0172	22.8457	NaN	NaN	27.8418	24.1019	NaN	25.8912	24.7014	26.0342	23.7586	21.7852	27.1315	27.619	24.4198	27.232	23.8367	NaN	23.2661	24.4114	23.3675	NaN	NaN	24.6443	23.0399	26.9728	25.2442	21.7444	27.4365	26.517	22.363	25.4458	25.5973	NaN	21.2171				31	26	22	23	19.9	17.3	223.57	0	323.31	2099100000	172
27.9313	27.9778	27.5339	27.7647	27.726	27.4191	28.0128	27.9094	27.3222	26.875	27.1951	27.2271	27.7136	27.3493	26.6674	27.8536	27.0726	27.9059	27.4296	26.9127	27.5287	27.0011	28.0012	28.0605	27.4861	27.0238	25.8997	27.2427	28.048	26.5832	26.0213	27.4972	26.6473	27.127	26.9415	27.3591				7	7	7	83	83	83	11.776	0	276.4	7562700000	173
23.4892	23.4248	23.1259	24.4011	23.7651	23.8801	23.6061	23.7416	23.5068	23.6494	23.9274	23.9121	23.2876	23.8731	23.4243	NaN	NaN	23.265	23.8927	NaN	24.0065	24.0843	23.3151	23.4377	23.2641	23.7824	23.2604	23.4454	24.1914	23.7941	22.8712	24.2686	23.6986	23.9132	22.8232	23.1477				4	3	3	12.7	10.5	10.5	51.366	0	5.7783	437420000	41
21.5924	NaN	21.331	20.7878	NaN	22.1109	NaN	NaN	22.7947	22.0854	21.4872	21.6299	22.5665	22.4328	21.6937	25.5046	25.4396	NaN	NaN	22.0465	22.4846	21.4991	NaN	NaN	22.2879	21.3021	22.2678	19.1139	20.6955	23.017	22.0505	21.2642	25.7648	21.0505	22.962	NaN				11	11	11	29.3	29.3	29.3	66.034	0	210.91	420090000	63
21.5351	21.1245	NaN	21.2212	NaN	23.2555	NaN	21.1954	22.1612	22.1895	21.8093	NaN	NaN	22.696	21.5522	NaN	21.0125	NaN	NaN	NaN	21.6635	NaN	NaN	NaN	NaN	NaN	22.6982	NaN	21.4317	NaN	21.9353	NaN	23.0623	22.5098	22.5744	22.4737				2	2	2	3.8	3.8	3.8	96.146	0	323.31	88394000	14
NaN	NaN	NaN	NaN	NaN	22.1441	NaN	21.8825	NaN	NaN	NaN	NaN	22.6023	21.8044	21.8447	NaN	NaN	NaN	NaN	22.1915	22.0561	NaN	NaN	NaN	NaN	NaN	22.9689	NaN	NaN	NaN	NaN	NaN	22.337	NaN	NaN	NaN				2	2	2	18.8	18.8	18.8	20.221	0	9.5471	51807000	19
26.2978	26.0879	26.145	25.8196	26.6199	26.0803	25.5694	25.6707	25.2364	26.0313	25.2922	26.2139	25.5918	25.4645	25.7726	25.3064	26.0551	25.8299	25.995	25.9219	26.1024	25.7154	25.963	25.7657	25.9945	26.7292	25.9679	25.7974	26.1153	26.2845	25.8803	26.1617	25.5572	26.0397	25.8629	26.2152				15	15	15	46.2	46.2	46.2	48.633	0	123.43	2732500000	314
23.9527	NaN	NaN	NaN	NaN	23.3835	NaN	23.2554	22.9871	20.4745	23.3124	23.4358	21.7872	21.3675	NaN	22.0859	23.2471	21.7411	21.3102	23.7896	21.2511	NaN	22.9106	20.3481	NaN	NaN	23.5963	22.1911	23.5451	NaN	23.3329	22.4275	22.5252	22.7204	NaN	20.8705				5	5	5	19.6	19.6	19.6	42.625	0	22.454	205220000	39
28.2766	28.2856	25.6055	27.6257	27.7148	28.3608	27.4934	26.9311	27.6519	27.0219	27.5222	27.6616	27.2482	27.6387	26.2996	28.4218	27.7066	28.3179	27.0849	26.7892	28.029	27.0477	26.1687	27.2462	27.6964	26.9135	25.5973	27.8366	27.3405	27.192	27.0092	26.5309	26.6839	27.0973	27.0323	26.4837				12	12	12	35.8	35.8	35.8	62.332	0	323.31	8950600000	397
NaN	NaN	NaN	NaN	NaN	NaN	NaN	NaN	NaN	NaN	NaN	NaN	NaN	NaN	NaN	NaN	NaN	23.802	NaN	NaN	NaN	NaN	NaN	NaN	NaN	NaN	NaN	NaN	NaN	NaN	NaN	NaN	NaN	22.9891	NaN	NaN				3	3	3	17.9	17.9	17.9	20.878	0	31.594	39281000	5
23.4783	23.9336	NaN	24.4425	23.5843	24.0044	24.1899	24.2133	24.121	23.9726	24.6213	23.916	24.5581	23.9213	23.6056	25.4864	26.0231	23.9758	23.8002	22.7241	24.3928	23.9522	23.5565	23.5365	23.1216	23.514	23.5516	23.3374	23.6173	24.09	24.2174	23.6452	23.9599	23.3511	24.6977	23.6175				8	8	8	59.9	59.9	59.9	20.455	0	38.197	815180000	93
NaN	22.1869	NaN	NaN	NaN	20.0506	21.7381	21.8134	20.5847	NaN	NaN	NaN	NaN	NaN	NaN	NaN	NaN	21.15	NaN	NaN	NaN	NaN	NaN	21.0955	21.1575	21.8522	NaN	20.0918	NaN	NaN	NaN	21.4806	NaN	NaN	NaN	NaN				3	2	2	15.5	10	10	44.424	0.0012219	3.079	29938000	9
26.1765	27.3545	24.898	25.354	25.3053	26.1679	25.8744	26.2996	25.638	25.2248	25.1994	25.5874	25.7648	25.1806	24.5855	26.5599	25.8556	26.2797	24.8077	25.6511	25.6136	25.3542	25.7404	25.4684	25.0444	25.7316	25.0842	24.9936	26.0621	24.9394	24.7919	25.1608	24.7024	25.0713	25.8746	26.0404				5	5	5	25.7	25.7	25.7	26.145	0	178.47	2815300000	230
NaN	21.0594	22.8787	21.7235	21.859	21.9726	20.9572	NaN	21.8274	21.3492	21.8725	21.8902	21.6778	NaN	NaN	21.6352	NaN	NaN	20.6857	22.0941	22.155	21.3714	21.1127	21.5928	NaN	NaN	21.7146	20.9572	21.1454	21.9239	21.9534	21.2332	21.6317	NaN	20.821	NaN				3	3	3	7	7	7	50.151	0	78.002	115320000	53
27.5424	28.1018	28.1641	28.1409	28.0908	28.0104	28.0105	28.5233	27.7525	28.7245	28.0261	28.5306	28.3046	28.2222	28.97	27.8853	28.0235	27.7269	28.4602	29.1715	28.4703	28.3364	28.7616	28.4745	28.3861	28.5749	29.1756	28.7346	28.318	29.013	28.9103	28.2847	28.7379	28.5086	27.9899	28.1785				10	10	10	28.6	28.6	28.6	47.697	0	115.86	14479000000	274
NaN	22.5153	23.1488	23.5057	23.1726	NaN	NaN	22.5012	NaN	22.5981	NaN	21.6145	NaN	NaN	NaN	NaN	NaN	23.4375	22.9099	22.0219	NaN	22.327	22.9409	23.2113	22.2096	22.1534	22.2131	NaN	22.9308	NaN	21.7875	22.5888	NaN	NaN	23.612	21.8412				2	2	2	17.9	17.9	17.9	17.951	0	49.302	160360000	34
NaN	23.2561	24.9281	22.306	NaN	24.6854	24.4636	23.7457	22.051	23.7835	24.4832	23.4902	24.908	23.786	24.5345	23.8165	24.3923	23.4284	22.663	25.1244	24.2437	24.0248	NaN	23.4378	22.4511	NaN	26.1357	24.5463	22.359	25.1803	24.9851	22.7274	24.2147	23.3582	23.9651	24.2914				15	15	15	26.9	26.9	26.9	106.49	0	80.371	723170000	145
25.62	25.3243	25.1859	25.9809	25.9608	25.3956	25.4863	25.2438	26.0624	26.0703	25.7641	25.9991	25.4524	26.0566	25.6819	25.1495	25.3262	25.1469	25.6507	25.1208	26.7203	25.2948	25.8458	25.3002	25.5504	26.108	25.9914	25.7259	25.5518	25.3538	25.4677	25.2068	25.9319	25.7276	25.5792	26.2141				14	14	14	32.7	32.7	32.7	61.448	0	323.31	2285700000	265
23.4094	NaN	23.5473	NaN	24.0901	23.3915	23.226	NaN	22.8444	NaN	23.284	24.2699	22.1641	NaN	23.3142	24.8412	NaN	23.9005	24.1286	23.8682	NaN	23.4125	23.5054	23.1509	23.5948	NaN	22.932	23.5973	23.4879	NaN	22.7611	23.724	23.2966	19.7694	22.3627	23.2631				13	2	2	47.4	4.3	4.3	36.983	0	89.429	378000000	33
NaN	23.2202	24.118	23.1353	23.4924	22.4472	NaN	22.9234	NaN	24.7274	22.7261	23.5701	22.6437	NaN	23.7839	NaN	24.9758	22.6632	24.8091	24.0583	NaN	22.8828	23.4408	24.1558	23.9835	25.3294	22.6536	24.179	22.8469	23.6182	23.749	24.8962	23.5755	23.8216	22.7933	23.5539				8	8	8	20.4	20.4	20.4	68.66	0	87.723	533010000	77
NaN	NaN	NaN	NaN	NaN	NaN	NaN	25.1865	NaN	NaN	NaN	NaN	NaN	NaN	NaN	NaN	25.0135	NaN	NaN	NaN	NaN	NaN	22.64	24.1828	NaN	NaN	NaN	NaN	NaN	NaN	NaN	NaN	NaN	NaN	NaN	NaN				9	9	9	40	40	40	42.1	0	20.039	146600000	19
22.358	23.1214	20.0856	22.4221	22.015	22.0143	23.1379	NaN	21.6241	21.8885	21.8377	22.4069	21.8027	NaN	NaN	NaN	24.1565	22.2551	22.6047	22.4559	NaN	22.033	21.8479	23.9406	23.1395	21.8986	21.3863	22.1773	22.501	21.6892	21.2198	22.3556	21.122	NaN	22.0248	21.7903				2	2	2	30.4	30.4	30.4	14.523	0	5.5653	218700000	38
22.492	21.6515	24.491	25.1734	23.211	24.6564	24.4874	NaN	27.6968	26.4468	26.8841	25.6589	26.1373	27.4593	25.1065	26.459	27.7624	21.5244	24.3489	21.1083	27.1433	24.4207	24.0403	21.8068	24.5824	NaN	27.2459	23.2363	23.623	26.7107	26.9322	20.7195	27.7456	24.9569	26.0618	23.6843				13	13	13	41.9	41.9	41.9	46.312	0	323.31	2640000000	188
25.2981	26.0385	27.075	25.7258	25.6041	26.8334	25.7542	26.1864	25.1429	25.8857	26.1166	26.1406	26.8035	26.4567	27.1898	26.1071	26.6258	25.9321	25.7876	27.1346	26.0183	26.3197	25.6701	25.8772	25.6325	25.3886	26.4862	26.7754	25.4695	26.8615	27.1504	25.5491	25.9234	25.5587	26.1856	25.1032				6	6	6	16.6	16.6	16.6	48.755	0	323.31	3196200000	146
NaN	NaN	NaN	NaN	NaN	NaN	NaN	22.2985	NaN	NaN	NaN	NaN	NaN	NaN	NaN	NaN	NaN	NaN	NaN	NaN	NaN	NaN	NaN	NaN	NaN	NaN	NaN	NaN	21.7643	NaN	NaN	NaN	NaN	NaN	NaN	NaN				2	2	2	12.8	12.8	12.8	37.418	0	81.749	15395000	3
25.3672	23.9492	NaN	24.6248	NaN	23.9136	23.9647	24.9392	23.5722	24.5835	23.0677	24.4035	NaN	NaN	24.7116	23.5679	22.9306	23.8055	24.5005	24.0705	24.255	NaN	24.4646	24.0705	24.0664	24.9502	22.9615	24.1237	25.1993	NaN	23.7703	24.7403	NaN	25.015	23.9189	25.1994				3	3	3	21.8	21.8	21.8	19.525	0	6.4985	740870000	56
24.4475	25.6679	25.9193	24.9284	24.6463	24.4198	24.412	25.756	23.6632	25.0689	24.1132	24.2726	24.8669	24.5345	25.813	24.4763	25.5657	24.5422	24.8853	25.3969	24.2959	24.4182	24.082	25.0888	24.184	22.9444	24.5417	25.2826	23.4661	24.8501	24.6799	24.6515	23.9973	24.3504	24.6094	22.5303				4	4	4	46.3	46.3	46.3	14.57	0	323.31	1449400000	124
24.6752	23.9754	23.8483	24.1787	NaN	24.039	24.137	23.375	23.6185	23.5836	24.0497	23.7714	23.8497	23.4796	23.1382	24.7042	24.5609	24.5472	NaN	23.9735	NaN	24.2842	24.0492	24.6531	24.3516	24.4843	22.4389	23.8946	24.2364	23.5624	23.7056	NaN	NaN	19.727	23.9577	25.1008				6	6	6	18.2	18.2	18.2	53.254	0	200.14	636960000	72
23.8692	24.6153	23.9714	24.8689	24.5142	23.3623	23.4985	23.8423	23.9339	24.03	23.3539	24.0057	23.337	23.0166	23.4175	24.6873	24.0528	23.9406	24.5495	23.5581	23.4832	24.0508	23.853	23.512	24.0173	24.0514	23.2929	23.9342	24.4963	23.4368	24.0034	24.6933	23.5663	23.6155	23.2503	24.0761				4	4	3	23.3	23.3	19.2	22.313	0	160.97	721180000	93
31.2672	30.5431	30.3227	30.8813	30.7102	30.5654	30.6122	30.7654	30.5514	30.6507	30.4733	30.9204	29.9525	30.2126	30.3018	30.6838	30.0917	30.6746	30.7248	30.1213	30.8069	30.9697	30.6817	30.7098	30.1282	30.4733	30.1022	30.375	31.0817	29.9987	30.0714	30.6063	30.3715	30.4766	30.7742	30.4952				11	11	11	60.3	60.3	60.3	22.391	0	323.31	87661000000	1448
28.5108	27.4082	27.9606	28.5696	28.3841	28.493	27.4131	28.1579	28.2059	27.8361	27.7223	28.0348	28.3951	28.2488	27.9798	27.125	26.9798	28.0337	28.1215	27.6417	28.2732	28.4302	28.5757	27.7942	27.5126	28.208	28.0465	28.2684	28.2142	27.939	27.7305	28.736	27.8289	27.7064	27.816	28.2879				7	7	7	21.4	21.4	21.4	37.54	0	164.35	10791000000	176
NaN	NaN	NaN	NaN	NaN	21.0235	NaN	NaN	NaN	NaN	NaN	NaN	NaN	NaN	NaN	NaN	21.6901	NaN	NaN	NaN	NaN	NaN	NaN	NaN	21.016	NaN	NaN	21.7608	NaN	NaN	NaN	NaN	NaN	NaN	NaN	NaN				2	2	2	32.1	32.1	32.1	11.372	0	6.3136	15059000	7
26.6518	25.952	26.6335	26.3544	25.9457	26.9419	27.1465	26.8829	26.2809	26.149	26.397	26.312	26.8758	26.9825	27.2203	25.6344	25.9929	26.7866	26.0203	26.4124	25.7066	27.0409	26.3719	26.6972	24.9875	25.7367	26.4369	27.066	25.9589	26.3236	26.6403	25.7841	25.7428	26.2738	26.0884	26.3375				7	7	7	29.4	29.4	29.4	27.843	0	217.85	3549800000	121
20.8733	21.7978	21.5963	21.4956	22.1105	21.1881	NaN	NaN	20.5715	20.6328	NaN	21.4384	21.3084	20.3896	NaN	20.4389	21.3891	21.4732	21.2925	21.2351	20.2619	21.5633	21.4044	NaN	21.4322	21.3076	NaN	NaN	21.1112	21.2587	21.126	22.1648	NaN	21.0918	20.3452	21.5133				2	2	2	5.7	5.7	5.7	62.608	0	11.636	80590000	40
24.3167	21.0793	NaN	NaN	NaN	24.1749	22.0383	23.275	NaN	21.9762	22.9009	NaN	23.7509	NaN	22.4491	NaN	NaN	NaN	NaN	22.4526	20.8939	NaN	22.2283	NaN	21.5481	NaN	21.4468	22.9145	20.6779	NaN	NaN	22.2172	21.4613	21.188	NaN	21.9546				4	4	4	21.3	21.3	21.3	39.111	0.00026226	4.1518	130230000	25
27.9544	27.0406	26.9047	26.5923	27.7982	27.9197	27.434	28.4311	27.0194	27.2653	27.194	27.1494	27.6597	27.1161	26.8226	26.6108	26.8571	27.4373	27.0035	28.0387	26.9307	26.9342	27.5836	27.4895	26.9562	26.5732	27.3033	27.0374	27.7793	27.0699	26.9542	27.3588	27.0407	27.2207	27.5922	27.3823				18	18	18	54.8	54.8	54.8	64.735	0	323.31	7682100000	512
26.7203	26.2331	28.4085	26.9937	26.96	27.9651	27.9127	27.6068	26.895	27.4384	27.7027	27.6649	27.9474	28.055	28.2124	26.7944	27.0173	26.988	26.4427	28.5664	27.4918	27.4324	26.8622	26.5426	26.6421	25.9784	28.482	27.9204	25.8033	28.2112	28.2778	26.5969	27.5929	27.0596	27.4336	26.8802				14	14	14	35.9	35.9	35.9	73.68	0	323.31	8042800000	324
24.998	25.8197	25.7543	26.1617	25.6832	25.2423	25.2712	25.0825	24.5967	25.7792	25.0578	25.6846	24.865	24.4206	26.0889	25.784	25.4842	24.9915	25.3371	26.0736	24.9217	25.4929	25.8265	25.8865	26.1791	25.981	25.7374	25.9064	25.1961	26.0545	25.1411	25.953	24.9065	25.4171	25.032	25.4213				11	10	10	39.9	36	36	46.871	0	323.31	2007100000	191
23.0478	NaN	NaN	NaN	NaN	NaN	21.7233	22.0062	NaN	22.3257	22.0469	20.7997	21.6269	23.5181	23.6903	NaN	NaN	21.6387	21.7324	21.4353	NaN	NaN	NaN	NaN	NaN	NaN	22.3179	22.7104	NaN	NaN	22.9161	21.6317	21.7576	22.4615	NaN	NaN				3	3	3	3.7	3.7	3.7	109.15	0.0025671	2.5851	119890000	13
29.5474	28.616	28.254	29.1749	28.8116	28.587	28.7403	28.8826	28.5296	28.1647	28.0782	27.9625	25.551	28.8815	28.8163	28.0191	27.4977	29.1649	29.0815	28.2025	27.5228	26.2939	29.0819	28.9115	28.3407	28.752	27.3095	29.1239	28.8815	27.8841	28.0162	28.8847	27.018	28.1468	28.0726	28.7072				5	5	5	28.3	28.3	28.3	16.06	0	195.34	14291000000	134
25.0035	25.8095	26.0203	25.4702	25.0296	25.6234	24.5975	26.1282	25.1823	25.993	25.3705	25.6415	26.4643	25.5672	26.6514	23.9013	25.214	25.6668	24.5014	26.3113	25.7106	26.2848	25.1762	25.5026	26.0946	25.4588	25.9098	25.8739	24.5672	25.8136	25.398	26.1171	26.0191	25.5582	26.071	23.9329				5	5	5	22.6	22.6	22.6	46.108	0	76.179	2538500000	190
24.1781	25.0299	24.8015	26.5956	25.4447	25.7197	24.7647	23.6166	26.6527	25.3499	25.974	25.6149	26.3857	27.1025	25.7227	26.8488	26.8941	25.2704	24.4331	24.6544	26.4008	25.1529	23.7133	24.1524	25.1509	NaN	27.6922	24.3853	24.0879	26.7553	26.0575	22.3401	26.7987	25.1227	25.5166	25.1801				10	10	10	9.9	9.9	9.9	141.72	0	323.31	2489600000	143
[truncated: 2,614 more rows]
[truncated: 4 more columns]
