# Supplementary material for: Classic Hodgkin Lymphoma Refractory for ABVD Treatment Is Characterized by Pathologically Activated Signal Transduction Pathways as Revealed by Proteomic Profiling
Source: Cancers (Basel). 2022 Jan 4;14(1):247. doi: 10.3390/cancers14010247 (PMC8750842; doi:10.3390/cancers14010247)
Supplement: Supplementary file 1 [file cancers-14-00247-s001.zip › Supplementary Table S3.xlsx]

## Sheet: 1197 proteins indentified with 
1	2	3	4	5	6	7	8	9	10	11	12	13	14	15	16	17	18	19	20	21	22	23	24	25	26	27	28	29	30	31	32	33	34	35	36	C: Only identified by site	C: Reverse	C: Potential contaminant	N: Peptides	N: Razor + unique peptides	N: Unique peptides	N: Sequence coverage [%]	N: Unique + razor sequence coverage [%]	N: Unique sequence coverage [%]	N: Mol. weight [kDa]	N: Q-value	N: Score	N: Intensity	N: MS/MS count
26.8934	27.8391	28.6409	28.3181	28.3997	27.2197	25.482	27.6256	27.6034	27.9174	26.9935	27.6194	26.9576	27.3789	27.9928	27.2442	27.9651	27.5232	28.6164	27.9243	27.2833	27.8989	27.9958	27.7102	27.913	29.1418	27.3375	27.7532	27.9793	27.6775	27.1364	28.3233	26.894	27.7463	27.9524	27.4263				25	25	24	40.6	40.6	39.7	116.44	0	323.31	9055200000	420
25.8109	26.1258	26.4162	26.6982	26.4721	25.8307	25.7435	25.8718	24.9262	26.0838	25.1247	26.3847	25.9614	25.8376	26.4343	25.3141	25.3448	26.0857	26.4993	26.3838	25.7236	26.3499	26.1798	26.3103	26.3383	26.3618	26.2122	26.2867	25.9845	26.1362	26.0836	26.1717	25.7475	26.2448	25.7174	26.6252				13	13	13	19.1	19.1	19.1	105.47	0	323.31	2816400000	218
28.9475	28.436	27.5892	28.911	28.5375	28.3981	28.4082	28.6905	27.9874	28.2993	27.9855	28.3359	28.3387	28.2665	28.4885	27.3389	27.7885	28.5809	28.9916	28.1178	27.6315	29.1114	28.827	28.8929	28.4408	27.9463	27.6269	28.7069	28.5734	28.0234	27.9762	28.814	27.9913	27.9398	27.869	28.1775				7	7	6	6.1	6.1	5.5	205.42	0	323.31	14729000000	301
25.425	27.2329	27.3475	27.2492	27.6958	27.1376	26.7303	26.4377	26.5372	26.5297	26.493	26.0373	26.3462	26.9018	27.4832	25.7264	27.0636	26.7019	27.4265	26.394	26.9903	27.1382	26.2081	26.8209	26.6529	25.404	26.0053	27.2388	25.5139	27.034	26.6241	27.111	26.8976	26.798	25.8258	26.5721				12	12	12	57.4	57.4	57.4	36.071	0	284.21	4625300000	176
26.3235	25.2935	25.3423	26.1155	26.2359	25.565	25.224	25.4256	24.6582	25.0228	25.1322	24.7037	24.606	24.4174	24.2485	24.3001	22.3387	26.6132	25.3319	25.738	24.5835	25.1288	25.7316	25.8919	24.846	24.9602	24.3164	24.553	25.15	24.2734	24.2167	24.2678	24.6249	25.5185	25.7068	26.1868				9	9	9	37.6	37.6	37.6	37.419	0	323.31	1640400000	218
25.6365	25.7444	26.3816	25.8354	25.68	26.6706	25.6543	25.249	26.2021	25.6623	26.1361	25.6775	25.6515	26.9695	26.7184	25.4404	26.291	26.0959	25.4321	26.481	26.112	25.7074	24.9123	25.4356	25.6333	25.3867	26.3566	25.9338	25.0451	26.389	26.4787	25.1408	26.0491	25.9366	25.659	25.0599				23	23	23	33.9	33.9	33.9	121.68	0	323.31	2716700000	385
25.5016	25.0053	26.7201	26.2153	26.1416	26.6867	26.373	26.5513	26.4053	25.8097	26.1545	25.8639	26.8577	26.3044	25.6881	26.7648	25.747	25.9369	25.6918	26.7012	26.3271	26.1408	25.5688	26.2691	26.259	25.7357	26.568	25.7707	26.2468	26.0495	26.3824	25.8638	25.9119	26.12	26.5543	26.7529				21	21	19	30.6	30.6	28.3	124.84	0	323.31	3174100000	393
27.1461	26.5714	25.6721	26.3588	26.6308	26.0768	26.5359	26.4368	25.5769	25.699	25.806	25.3122	26.5542	25.952	24.6272	26.0019	25.3736	26.9772	26.3199	25.7231	25.8505	25.8474	26.0941	25.8933	25.9527	26.1439	24.801	25.6853	26.3128	25.1913	25.3531	26.1518	25.4559	25.4541	26.04	25.8154				5	5	5	32.7	32.7	32.7	23.354	0	128	3190500000	201
25.1201	25.0127	25.9279	25.3141	25.9915	25.1616	25.0344	24.7609	24.2277	25.4552	24.6834	26.0335	26.0581	24.5576	25.1434	24.3582	24.9379	25.7449	25.8727	25.2364	25.1934	26.0653	25.0612	25.5768	25.9034	25.6355	25.117	25.521	25.4619	25.4186	25.3966	26.023	25.0407	25.2023	24.2107	24.6358				4	4	4	17.3	17.3	17.3	37.636	0	125.62	1742600000	72
26.3609	26.0383	26.0822	25.6706	25.68	26.7169	26.0282	26.0611	25.0532	25.7406	24.9301	24.9519	26.758	25.3135	25.7485	24.5059	24.6893	26.1591	25.1879	26.7046	24.6755	25.1696	24.3477	26.1643	25.7168	24.2522	24.7965	25.2136	25.7138	25.1474	24.5437	25.5458	24.7256	24.9958	25.5141	23.7243				5	5	3	25.4	25.4	15.8	34.69	0	78.343	2159000000	132
26.8681	27.0393	26.9074	27.1213	27.5162	27.0916	26.6487	27.1089	26.4241	26.5382	26.3269	26.7438	26.3948	26.3086	26.4866	26.449	26.5025	27.2211	27.1336	26.4603	26.1307	26.7121	26.9518	26.7353	26.7645	26.7013	26.5108	26.4753	26.7934	25.8346	26.6733	26.9035	26.1387	26.8252	26.6148	26.6007				10	10	10	32.2	32.2	32.2	47.463	0	323.31	4498600000	259
24.3527	25.3519	25.2816	24.7425	25.5206	25.0154	24.301	24.7528	24.3378	24.212	24.2565	23.8076	24.6898	23.2306	24.1058	27.5107	26.568	24.3888	24.408	25.4018	25.6644	25.9269	24.6307	24.542	25.2302	25.6269	23.9052	24.4726	24.3985	24.1669	24.5533	25.7802	24.2553	23.9494	25.2373	25.6014				13	13	13	43.2	43.2	43.2	52.904	0	323.31	1916200000	165
29.8941	29.1862	29.3456	29.7605	29.2605	29.8691	29.5354	29.909	29.5651	29.2552	29.4843	29.2362	29.5539	29.4521	29.1174	28.9763	28.5048	29.7778	29.4097	29.1837	29.4292	29.645	29.408	29.8254	28.9629	29.1273	28.8814	29.3217	29.9673	28.6942	28.9471	29.6198	29.0068	29.2307	29.5479	28.9264				12	12	12	68	68	68	26.922	0	323.31	29150000000	686
28.186	28.0142	28.054	28.3615	28.3675	27.6295	27.7522	27.6296	27.4525	27.7708	27.325	27.609	27.7479	27.1733	27.6147	27.6742	27.0569	27.8097	28.339	27.5981	27.1656	27.8736	27.8204	28.0918	28.5025	29.0694	26.982	27.793	28.0647	27.2445	27.471	28.3808	27.1212	27.2403	28.1816	28.4759				8	8	8	29.4	29.4	29.4	37.563	0	323.31	9344500000	247
26.1959	26.9733	26.209	26.8129	26.938	26.0281	26.7354	25.7477	25.7974	26.7425	26.1626	26.5597	26.0192	25.7887	26.0835	26.0946	26.1568	26.7094	26.7282	26.2963	26.1582	26.5219	26.856	26.5812	26.4689	26.6958	26.7259	26.1674	26.3287	26.3457	26.4111	26.7128	26.5119	26.769	26.0231	26.8284				20	20	20	29	29	29	123.63	0	323.31	3811100000	374
25.6198	25.0447	25.4343	26.2209	26.1635	26.0906	25.8339	25.2894	25.2373	25.242	25.5199	25.4227	26.2981	25.7065	25.7218	24.9311	25.8097	25.9561	25.6172	25.7688	26.1738	25.9123	25.5463	25.4878	25.9292	26.1318	25.8707	25.2923	25.7139	25.3846	25.455	25.5741	25.5924	25.4789	26.0154	26.0104				18	18	18	40.5	40.5	40.5	78.099	0	323.31	2208900000	318
23.6825	25.088	24.739	23.773	24.4499	24.142	24.6956	24.5192	23.7753	24.1402	23.8799	24.2212	24.3051	23.8189	24.3438	24.5066	24.5092	24.3095	24.5854	24.3896	23.6529	24.112	24.2273	24.327	23.9425	24.0701	23.8087	24.5505	24.3124	24.0918	24.3042	24.2588	23.7462	24.0364	24.1197	23.7503				5	5	5	18.3	18.3	18.3	39.336	0	130.41	829510000	181
26.1876	25.3927	25.1884	26.6598	26.1061	25.7151	25.7302	25.8121	25.3497	25.8381	25.9616	26.2973	25.7483	25.0449	25.5079	24.3557	25.2552	25.4776	26.1059	25.4726	25.8958	26.3098	26.1291	25.8798	26.1207	26.3485	26.002	25.2094	26.1907	26.0189	25.6755	26.3818	25.272	26.3913	25.6078	25.7602				6	6	6	37.4	37.4	37.4	34.577	0	190.41	2556800000	172
23.7861	24.8782	23.9406	23.6971	22.1338	24.1235	24.1703	23.7889	23.9415	23.9729	23.9249	24.0794	23.9434	23.0977	23.9678	24.3874	24.462	24.1938	23.6509	24.1769	23.6654	24.0365	23.846	23.5525	24.0146	23.0948	24.0215	23.4477	23.6948	23.6882	23.8679	24.1464	23.9129	23.9217	23.9336	24.1162				6	6	5	20.7	20.7	18	57.81	0	129.41	699840000	145
23.8069	24.3342	23.55	23.2163	23.6165	24.1861	24.5276	23.9058	24.2018	23.6625	23.9148	23.483	23.5957	23.1617	22.9138	24.2069	22.8938	22.887	22.9911	23.5792	23.5599	23.0265	23.5883	24.4207	23.2849	22.8059	22.3274	23.1414	23.1341	22.8806	23.7121	23.7551	22.3303	23.5506	24.2555	25.0909				4	4	4	28.9	28.9	28.9	32.444	0	62.834	539060000	117
26.3132	27.2043	27.3959	27.1161	27.0768	26.6536	26.9575	26.6611	26.4582	27.0494	26.6074	27.2182	26.8945	26.7057	27.0907	27.1968	27.1723	26.986	27.0359	27.3844	26.9352	26.8422	27.2454	27.2575	27.1826	27.2567	27.4118	26.6438	26.9165	26.8086	26.4724	27.3403	26.4587	26.7457	26.9609	27.4107				14	13	4	31.9	30.2	12.4	73.243	0	323.31	5596300000	365
24.3733	24.2445	19.4224	23.4139	24.2469	23.456	24.7571	24.6412	24.6353	24.3361	24.2489	24.3141	24.5042	25.0154	24.0324	25.1655	23.606	24.3917	23.8334	23.556	23.8203	23.0415	24.9165	24.8503	23.5309	23.383	24.5138	23.8226	24.4164	24.0202	23.9041	24.0771	24.1784	23.9302	25.0249	24.3549				6	5	5	29.4	26.7	26.7	57.886	0	323.31	815850000	80
24.6006	24.9001	25.2485	25.1967	25.5091	24.2961	24.7538	24.9506	24.7776	25.418	24.4935	25.3006	24.4649	23.4244	24.8768	24.1936	23.1889	24.8395	25.3937	24.7613	24.6126	25.0257	25.2212	24.5955	24.9693	25.2345	24.1812	24.8744	25.4731	24.7697	24.1408	25.3227	24.5387	25.328	24.7205	24.9022				9	9	9	40.9	40.9	40.9	38.946	0	246.64	1275300000	196
28.5012	28.0246	27.1636	28.6329	28.7289	27.0282	27.8553	27.0145	27.8553	27.2238	27.8127	27.1738	27.4901	27.5015	25.9112	28.1345	27.186	27.6925	27.6752	26.3096	27.9797	27.381	27.4491	27.8719	27.6623	26.8606	26.1994	27.506	27.4006	26.683	26.2456	27.6042	27.1761	27.6002	27.7454	28.0161				18	18	18	27.8	27.8	27.8	113.61	0	323.31	8424300000	484
26.7894	26.627	25.8084	25.75	26.1614	26.8178	26.7281	26.4377	26.5482	25.6056	26.6849	26.2487	26.1411	26.5593	25.694	26.6581	26.9535	26.139	25.9877	25.4807	27.304	26.0535	25.6938	25.7835	25.9727	25.9125	25.7527	25.7302	26.6041	25.3691	25.4619	26.3058	26.0758	26.3487	27.1497	25.6424				9	9	9	51.6	51.6	51.6	35.102	0	323.31	3507500000	258
26.0249	25.5846	26.1731	26.3347	25.8575	26.3051	25.6229	25.9832	26.4899	26.1307	26.4283	26.0087	26.3327	25.9852	25.8918	25.3486	26.1085	24.3047	26.3175	26.0277	26.5361	25.9938	25.8973	25.8855	25.9453	25.8233	26.4804	25.7531	26.0081	25.9861	25.9009	25.8026	26.4818	25.7252	26.5214	26.4601				12	12	12	62	62	62	34.482	0	261.2	2784200000	190
26.2913	26.3923	25.2925	25.8396	25.4772	24.1843	25.2523	25.9874	24.442	25.7259	24.7782	24.292	25.2816	24.8506	25.5341	25.4922	24.8431	25.6245	25.988	25.0354	24.7174	25.3076	25.8068	26.0747	25.5551	25.9867	24.523	25.6914	26.3245	25.5167	25.2785	26.0686	25.2061	25.5341	24.9115	25.3219				4	4	4	20.4	20.4	20.4	29.04	0	89.353	1948400000	120
25.9527	25.2923	26.0976	25.7129	25.0062	25.437	25.9445	25.2503	25.7742	25.4223	25.6014	25.6986	25.1077	25.2432	24.7737	25.4377	24.6863	26.2777	25.7422	24.6364	25.0469	24.7525	26.155	25.3672	25.0744	26.0136	24.9759	25.9991	26.4723	24.8773	25.1722	25.6435	25.1363	25.4319	25.8039	25.9211				5	5	5	45.6	45.6	45.6	14.285	0	231.34	2202300000	200
29.7517	28.0879	28.1782	28.7042	29.2069	29.189	29.8297	29.0375	29.828	28.6972	28.9833	28.6935	29.801	28.5773	28.1556	28.7611	28.4536	29.1089	29.2472	28.1914	29.4933	28.7743	29.4056	29.1598	28.6742	29.534	27.9269	29.1931	29.7876	28.1535	27.4716	28.9405	28.3089	28.753	28.5602	28.7442				7	7	7	45.6	45.6	45.6	34.463	0	323.31	22185000000	414
29.1592	28.9499	27.9869	28.277	28.3352	28.0461	27.7502	28.8173	27.7856	28.1654	27.9237	28.0745	28.4736	27.5842	27.8931	27.6271	27.6758	28.93	28.5387	28.4849	27.5806	28.28	28.6353	27.984	28.4257	28.317	27.7319	28.127	28.5774	27.6322	28.0072	28.4648	27.7997	28.3439	28.5266	28.2851				9	9	9	48.4	48.4	48.4	27.887	0	323.31	13128000000	523
23.6872	24.4197	25.1684	24.7483	25.0018	23.7405	24.3195	24.2343	23.0983	24.0133	23.8114	24.1327	23.8284	24.5073	23.9474	23.9976	23.6514	24.4223	25.315	24.4837	23.8703	23.7842	24.1061	24.0789	24.4198	24.5983	24.4538	24.5763	23.5909	23.7898	24.241	24.7852	24.0516	24.737	23.6416	24.3907				4	4	4	24.2	24.2	24.2	38.287	0	102.88	844610000	100
26.1101	26.1677	25.5404	26.7099	26.2437	25.6476	25.1027	24.4681	26.5587	25.6495	25.2848	25.0314	24.9729	26.3018	24.0654	25.3534	25.944	26.3915	26.4233	23.8153	26.6824	25.2629	25.5407	25.4169	25.9172	25.0769	25.1888	25.4467	25.5443	24.7299	24.5138	25.3948	26.0259	25.5084	25.2435	25.4908				2	2	2	25	25	25	13.735	0	89.222	2128200000	78
25.044	25.4616	24.321	24.6286	24.2996	25.5712	25.0213	25.3543	24.1105	23.34	24.1136	23.8733	25.0995	22.4529	22.8948	26.3646	25.4595	25.4574	24.2042	24.4918	24.0894	24.5679	24.4435	25.8515	24.1761	24.8337	23.2427	23.7798	24.6695	23.5135	22.9255	24.8457	24.0157	23.5036	24.8318	24.6619				6	6	6	51.6	51.6	51.6	17.769	0	174.84	1956500000	176
24.0635	23.3843	24.1361	23.6737	24.8399	23.3896	23.5331	24.03	23.1374	23.7967	23.4636	24.1462	23.7859	23.2504	24.0202	24.2322	24.5535	23.8971	24.2139	23.9425	24.0887	23.2247	24.1476	24.2955	24.1402	23.9216	23.6351	23.7505	24.3953	23.1962	23.7707	24.199	23.748	24.0904	23.3697	23.7486				9	9	9	14.5	14.5	14.5	134.46	0	205.81	655060000	100
24.6249	25.7567	25.7253	25.6669	25.6398	25.2451	25.3198	25.6684	25.7227	26.1306	25.5196	26.4285	25.3072	25.4788	26.1953	25.8424	25.3216	25.1691	25.4732	26.421	25.7695	24.7384	25.91	25.2821	25.8841	25.4088	26.5685	25.8178	25.4603	26.2419	26.2328	25.6728	25.7917	25.999	25.8969	24.7672				25	25	25	35.4	35.4	35.4	123.38	0	290.33	2458700000	384
25.5215	25.6128	25.6324	25.742	25.7464	26.0121	25.1405	24.5337	24.4656	25.852	24.6916	25.4242	23.2631	24.9983	26.0315	25.6376	25.4362	25.2302	25.8322	25.6362	25.4708	26.3259	26.0539	25.4125	25.6913	26.1753	25.2747	25.2498	25.4658	25.4939	24.781	25.7405	24.523	25.9968	24.2127	25.9196				21	21	21	30.2	30.2	30.2	144.73	0	323.31	1885500000	213
26.5898	26.7722	26.4355	26.397	26.5186	25.9206	26.277	27.6162	25.8033	27.3135	25.7683	27.2153	26.8158	26.2698	27.5817	26.0222	26.045	27.0848	25.2419	26.6911	26.5568	27.1399	27.1851	26.9986	26.6167	26.961	26.7265	27.1592	26.7424	26.7657	26.8588	27.1374	26.2921	27.3421	26.4937	25.0872				8	8	7	33.1	33.1	26.9	40.949	0	323.31	4525000000	151
30.6542	29.5242	30.2636	29.7119	29.3046	29.3845	29.4711	30.3254	29.4932	29.915	29.1138	29.6364	29.9602	28.8103	30.3543	28.8891	28.075	29.7498	30.2817	29.9373	29.0518	30.0259	30.2562	29.5834	29.4092	29.7977	29.0586	29.9964	30.0146	29.5188	29.834	29.836	28.7826	30.0839	28.6046	28.6736				9	9	9	36	36	36	34.333	0	323.31	34790000000	292
27.2852	26.955	27.4774	27.2772	26.7124	26.5674	26.4813	26.7372	26.117	26.727	26.3746	26.8837	27.0012	25.447	26.6409	25.3312	26.1115	27.0729	27.5432	26.7882	26.4546	26.6994	26.8099	27.2856	26.5926	26.6366	26.0952	26.8195	26.1995	26.0924	26.1208	27.1408	26.1211	26.4139	26.4361	26.0238				3	3	3	15.2	15.2	15.2	20.546	0	154.16	5735800000	219
23.8665	27.241	23.7295	23.663	23.8456	23.6438	23.8367	22.9339	23.2594	23.7957	23.75	23.0373	23.4107	22.5402	23.9315	23.2548	25.123	23.2258	24.0272	23.4414	23.2037	24.1762	24.3735	23.6267	24.1982	24.2922	23.1787	23.3332	23.835	23.1686	23.2821	24.1512	23.1763	23.4685	23.4211	23.892				5	5	5	20.5	20.5	20.5	38.646	0	59.048	767560000	86
25.1786	25.425	25.3827	25.8116	25.0328	25.1545	25.461	25.0518	24.6694	24.7316	24.7718	25.0373	24.9143	24.3203	24.3464	23.9147	24.7166	25.7643	25.2668	24.2109	25.0524	25.6851	24.7767	25.1907	24.6427	25.135	23.987	25.2006	25.1589	24.4377	24.715	25.4953	24.3596	25.2869	24.808	25.323				5	5	5	42.6	42.6	42.6	14.582	0	300.89	1313900000	65
25.042	25.8365	25.6724	25.5966	26.1272	26.4917	26.2387	25.6681	25.264	25.7495	26.2261	26.0599	25.6797	23.6362	25.1979	26.542	25.7712	26.3694	25.6096	25.578	25.6388	25.7693	25.2373	26.0071	25.6142	24.8046	25.6238	25.6127	25.4306	25.5662	25.5636	25.1599	25.2799	25.5606	26.2535	26.1079				13	13	12	61.5	61.5	58.3	28.356	0	59.778	2285800000	169
23.799	24.3471	24.3573	25.3385	24.4132	23.8017	24.2468	24.1321	22.9407	24.5009	23.4477	23.8889	23.9114	23.0794	23.9535	21.4778	23.6929	23.3733	24.9639	24.7658	24.285	23.9829	23.8068	24.2592	24.6869	24.9201	23.9286	23.5128	23.9316	23.7322	24.0782	24.4643	23.7482	23.4569	24.0357	24.732				8	8	8	30.3	30.3	30.3	58.14	0	41.923	724960000	137
26.5158	27.2397	27.0622	27.0802	27.5928	26.6659	26.9797	26.9877	26.9489	26.9914	26.6037	26.5228	27.0614	26.2148	26.87	26.5102	26.3804	26.9958	27.576	27.0338	27.2128	27.1538	26.9526	27.1302	27.3291	27.8627	26.803	27.0879	26.7918	26.8517	26.5227	27.5787	26.9083	26.7108	26.231	26.4987				6	6	6	41	41	41	27.4	0	323.31	5392100000	287
29.9738	29.3673	28.6861	29.4451	29.3587	28.6567	28.765	29.3849	28.8475	28.5652	28.4015	28.5343	29.1659	28.939	28.6282	27.7754	27.5232	29.8717	29.0878	27.5227	27.2866	29.7689	29.1422	29.333	28.3495	28.2885	27.8394	28.9429	29.1764	27.5717	28.084	29.2346	27.7499	29.3741	27.9272	28.129				6	6	6	58.3	58.3	58.3	16.32	0	226.58	19436000000	138
25.3953	25.4726	26.5324	25.8865	25.5442	26.2372	25.622	25.7032	25.2139	25.8944	25.2274	26.5156	25.2827	25.0485	26.6155	26.4582	25.9216	25.7905	25.331	26.3368	24.7854	25.9404	25.9972	25.3975	25.8883	25.4322	26.2359	26.1213	26.2368	26.0659	26.325	26.2973	25.5635	25.8207	25.5643	25.8191				20	20	19	36.1	36.1	35	90.932	0	323.31	3023500000	339
25.9705	25.6499	25.485	25.7809	25.417	25.541	25.2007	25.6904	24.9266	25.7303	25.4172	24.813	25.3287	24.8906	25.5368	25.4806	24.4026	25.847	25.8132	24.9427	25.6011	25.83	26.0995	26.1358	25.6366	25.5167	24.6741	25.7636	25.3915	24.8374	24.2961	25.7379	25.0663	25.0841	25.6288	24.9764				2	2	2	28.7	28.7	28.7	16.694	0	53.377	2313000000	97
25.6409	25.5404	25.1876	26.3124	25.7146	24.8354	25.4147	25.6553	25.0325	25.6404	25.2019	25.5687	25.1045	23.8322	25.7842	24.9884	25.073	25.6092	25.3722	25.5135	25.48	25.3518	26.0535	25.1684	25.7516	25.7021	25.1603	25.263	26.0106	24.9906	25.3537	25.5681	25.3092	25.4562	25.4425	25.7616				12	12	12	29.4	29.4	29.4	60.977	0	73.284	1955400000	199
24.864	24.7406	23.83	24.8666	25.5173	23.6259	24.3108	24.4547	23.4487	23.9848	24.0294	24.0996	24.1123	23.3819	23.669	24.4865	23.9957	24.665	24.8958	23.6764	23.7421	24.5575	24.3229	24.3595	24.0408	24.7069	23.7489	23.9929	24.3641	23.1911	23.6422	24.6335	23.7009	24.082	24.3093	24.489				4	4	4	25.9	25.9	25.9	15.548	0	107.81	816110000	156
25.5411	24.9626	23.9869	25.1401	24.6461	25.6761	25.3067	25.0815	25.0848	25.1849	24.7829	24.8731	25.4569	23.5529	25.3491	25.0507	26.3895	25.3517	25.0144	24.6852	24.8057	24.9033	26.0403	25.8091	24.6701	25.0954	24.5754	25.735	25.2703	24.6808	25.1189	25.5191	24.5795	25.2716	25.6728	24.0355				5	5	5	26.3	26.3	26.3	32.251	0	220.58	1610700000	88
28.7765	27.0866	26.6686	28.0669	27.9327	27.302	28.2672	28.2414	27.7791	27.2956	27.8541	27.4146	27.7388	28.094	26.5368	27.9399	26.9438	28.222	27.5134	26.6832	27.1981	27.2057	27.4781	27.3727	27.3274	27.8059	27.0835	27.1242	28.5355	26.7323	27.019	27.8194	27.4266	27.4202	27.2967	28.6841				9	9	9	47.3	47.3	47.3	19.901	0	323.31	10088000000	319
25.8982	25.852	26.6413	26.0235	25.7881	25.7192	25.27	25.4431	25.1373	25.7015	25.2069	25.1931	25.6516	25.67	26.0079	25.0118	24.292	25.8145	26.4287	24.9308	25.802	26.0751	25.6199	26.5558	25.5609	26.2181	25.1201	26.0114	25.5128	25.1717	25.3189	26.0781	25.0751	25.708	24.9599	25.6897				4	4	4	31.1	31.1	31.1	19.208	0	164.26	2034400000	114
23.0159	25.1979	23.8315	23.6772	22.7485	23.8498	23.5696	22.6782	23.4979	22.8509	23.2024	23.3691	23.456	22.8005	23.3104	23.9617	24.2372	23.1975	23.6197	23.4363	24.7067	23.0439	23.097	22.9082	22.8198	22.6095	22.5204	23.2516	22.7147	23.0486	23.1445	23.0156	22.9463	22.4079	23.8824	24.2215				6	6	6	22.9	22.9	22.9	46.381	0	52.299	455940000	73
24.9014	26.2528	26.5642	26.6494	26.4212	25.5732	26.1628	26.0664	25.623	26.2241	25.331	26.2696	26.3055	26.3376	26.1494	25.2754	25.2763	26.265	26.6524	25.2869	25.9016	26.5257	25.748	26.1612	26.0734	25.9497	25.7873	25.8993	26.7054	26.0746	26.1214	26.516	26.0473	26.4264	25.6865	25.6377				5	5	5	18.9	18.9	18.9	39.589	0	315.68	3109900000	155
25.3952	24.8957	25.44	25.2793	25.4957	25.6148	25.3903	24.8095	25.6159	25.427	25.6134	25.2899	25.2515	25.6543	26.2156	25.2422	26.3946	25.8908	25.0786	25.1297	25.5309	25.4377	25.1779	25.5406	25.2476	24.914	26.1871	25.3118	24.4825	25.7963	25.3431	24.6993	25.7452	25.4739	25.9337	26.1612				14	14	14	21.4	21.4	21.4	112.59	0	164.26	2198600000	176
27.9912	26.3186	25.6454	26.8742	27.414	26.5904	27.0115	26.3621	27.0719	25.7667	26.7954	25.6435	26.3566	26.5434	24.4576	26.7596	25.3782	27.1829	26.3662	25.4658	26.8904	26.7883	26.5988	26.6938	26.2736	27.244	25.2645	25.6096	27.5758	25.2024	25.08	26.5763	25.9533	25.7465	27.4549	28.5369				4	4	4	59.3	59.3	59.3	9.6138	0	262.32	4696800000	197
27.5409	27.3734	27.4339	27.8469	27.8053	25.9347	27.0372	27.2543	26.4847	27.4339	26.6911	27.7494	26.6364	25.9416	26.7384	26.9502	25.9145	28.0095	27.6122	27.2636	26.4134	27.6686	27.7806	28.2012	27.5787	27.6456	26.5896	27.4013	28.18	26.4087	26.8962	27.6039	26.7686	27.2854	26.1847	27.1053				8	8	8	32.8	32.8	32.8	51.258	0	238.74	6468900000	150
30.3039	30.2944	28.5035	29.3384	29.2981	28.5387	29.6931	29.2487	28.2195	29.0333	29.3952	28.9396	29.0927	28.1989	28.1101	28.6887	28.3498	30.1169	29.5127	28.3881	29.1947	29.1809	29.5254	29.6378	29.7698	29.752	27.6559	28.7151	30.0153	28.292	27.9895	29.7383	28.4927	29.3392	28.4972	29.1586				9	9	9	72.4	72.4	72.4	19.108	0	323.31	25577000000	346
25.448	25.164	25.4647	25.3784	25.9528	24.8283	24.6635	24.8955	24.5886	25.071	24.4765	25.0667	25.2538	24.784	20.7321	24.0721	23.7577	25.4939	25.2915	23.3786	24.3021	24.9294	24.8561	25.2033	24.7991	25.4267	23.1724	24.8745	25.4121	23.7307	24.0597	25.1949	24.4839	24.462	24.2235	24.7375				2	2	2	15.7	15.7	15.7	15.005	0	53.288	1222200000	83
26.6799	26.674	26.8567	26.3577	26.7492	26.7248	26.9269	26.706	26.3736	26.5285	26.4966	26.7421	26.9408	26.2922	26.6174	25.5272	25.7331	25.7877	26.7182	26.5058	26.3101	26.6771	27.0214	26.6606	26.6655	26.5713	26.0068	26.8265	26.5295	26.2657	26.4669	26.5925	26.3462	27.3002	26.2609	24.9366				8	8	8	37.6	37.6	37.6	38.792	0	219.04	3827400000	140
28.1284	28.3638	28.324	28.2318	28.7198	28.1295	28.0024	28.6931	28.1739	28.6275	28.2424	28.483	27.9786	28.3973	28.7083	28.0415	27.6974	28.7292	28.1923	28.4176	27.9933	28.6133	28.5401	28.2636	28.7192	28.9696	28.4777	28.6211	28.8427	27.9567	28.3136	28.5926	28.0948	28.4367	27.9664	29.0053				38	24	23	54.1	37.1	35.9	104.85	0	323.31	15274000000	729
25.8267	25.5878	25.7369	25.0865	25.6554	25.4406	25.6449	25.5274	25.4004	25.5913	25.4681	25.8219	25.6197	25.2415	25.5871	25.3053	24.7548	25.8699	25.603	26.0196	25.6649	25.6676	25.9661	25.5279	25.633	26.1817	25.6209	25.6802	25.7389	25.8489	25.3325	25.8856	25.7214	25.5449	25.62	26.0478				13	13	13	31.4	31.4	31.4	62.942	0	323.31	2136400000	312
27.652	27.4139	27.4995	27.5601	26.9096	27.3955	27.2554	27.5604	26.797	27.4404	27.1536	27.171	27.5104	26.3571	27.3864	24.981	26.5331	27.1181	27.8837	26.9788	27.117	27.337	27.8498	28.6036	26.8896	26.8554	26.9197	28.1845	27.7392	27.5764	26.8776	27.7657	27.146	27.0967	27.5125	26.7196				7	7	7	41.4	41.4	41.4	26.227	0	323.31	6612900000	192
27.0327	27.1417	26.5862	26.6388	26.9497	26.0441	26.4811	26.7878	26.1028	25.5573	26.6649	27.226	27.051	25.5202	26.606	26.548	25.8951	26.6786	26.9129	26.2393	26.2522	26.7121	27.4579	26.8666	26.4874	27.3695	24.5952	26.6982	27.0651	26.4069	26.0866	27.1733	26.2027	27.0087	26.3857	26.9959				6	6	5	47.9	47.9	38	16.801	0	323.31	4922500000	244
26.3306	25.4701	25.987	26.8503	25.347	26.171	27.3278	26.2941	26.4467	25.7194	25.9305	25.1724	25.7446	26.3987	25.898	25.4919	25.2306	26.3596	26.1564	25.6211	26.1141	25.5289	26.1434	26.0796	25.5005	25.0945	25.2238	26.0454	26.3417	25.0147	24.8134	25.6152	25.4569	25.2764	24.9865	25.5793				7	7	6	54.9	54.9	50.6	18.762	0	59.861	2564300000	177
24.5884	24.2091	24.3222	24.9921	24.5803	24.2548	24.8755	25.161	24.2682	24.7605	24.7517	24.824	24.718	24.6031	24.1525	24.5452	23.1686	25.4893	24.655	24.8022	24.2604	24.5857	24.6835	25.5485	25.0266	24.6492	24.3791	24.6476	25.2703	24.1119	24.6681	24.7098	24.2632	24.8999	24.4596	24.0005				9	9	9	35	35	35	45.378	0	137.81	1072800000	194
20.6301	21.6589	20.9865	21.8248	22.0066	21.265	21.4877	20.6641	21.4654	20.749	21.1375	21.2283	21.0744	21.6436	20.4804	20.4673	21.4627	21.4406	21.7753	21.0028	21.701	21.5856	20.8209	20.856	21.5668	21.3961	20.6857	20.5999	21.0501	20.6487	20.4431	21.365	20.5628	21.136	20.9913	21.0998				5	5	5	29.3	29.3	29.3	28.114	0	14.028	95259000	57
25.7472	26.1146	25.3102	25.7095	26.0016	24.2331	23.9971	25.3737	24.8114	25.7379	25.1635	26.0208	25.2712	23.9006	26.1738	25.7106	25.2016	25.4151	25.7823	25.761	25.5425	26.0776	25.7114	25.6042	26.1779	26.6621	25.9839	25.4194	25.9316	26.0088	25.935	26.3796	25.496	26.1932	24.8913	26.0477				23	23	23	29.4	29.4	29.4	138.91	0	323.31	2325900000	371
28.819	28.1247	27.4682	28.7569	28.8185	28.1052	28.813	28.4615	28.8463	28.3961	28.7581	28.6554	28.8104	28.9497	27.3198	28.2178	27.8784	28.7217	28.5302	27.5353	28.8054	28.2487	28.5723	28.0447	27.8947	28.0964	28.4036	27.9664	28.8066	27.7619	27.7469	28.6211	28.5732	28.1974	28.1889	28.8218				14	14	14	57.3	57.3	57.3	45.803	0	323.31	16255000000	581
24.1638	25.6299	26.2329	24.5692	26.0083	23.4907	23.7583	25.7531	23.5354	25.7353	24.6541	26.1146	24.3545	23.7893	25.6125	25.2612	24.4371	25.0739	26.3588	26.0862	25.55	26.7077	25.7832	25.9332	26.7641	27.2026	25.0898	25.8255	26.1767	25.4234	25.0314	26.0578	25.1972	26.807	25.0886	24.4859				8	8	8	30.1	30.1	30.1	43.332	0	323.31	2305400000	192
27.2041	26.7944	26.8797	27.052	27.1912	26.727	27.3416	27.2593	27.0349	26.8634	26.6982	26.7071	26.7685	27.3947	27.3156	26.8792	26.0851	27.1818	27.0909	26.8093	26.4887	26.6206	27.008	26.582	26.6554	27.3851	26.5571	27.0923	26.818	26.9222	26.503	27.1398	26.2444	26.8746	26.4302	26.7782				9	8	8	25.6	23.7	23.7	58.47	0	323.31	4929300000	163
26.0255	25.4371	25.9686	25.8388	25.9461	25.6638	26.387	25.9022	25.8769	25.9709	25.8443	26.3046	25.4263	25.5299	25.7885	26.1301	25.4843	26.456	26.0843	26.4719	26.2602	26.1773	26.6359	25.5533	25.9836	25.9272	26.5122	25.7686	26.3585	26.0659	26.2453	25.7028	25.8124	25.8981	25.5782	26.2205				15	15	15	27.3	27.3	27.3	107.89	0	323.31	2734300000	310
26.8098	26.4411	26.3889	26.6626	26.707	27.1085	27.5324	26.9438	27.2673	26.3492	26.5463	27.0475	26.1311	26.514	25.6597	26.2867	26.4496	26.9317	26.6458	26.6024	27.3359	26.9578	26.9465	26.2321	26.4081	26.575	26.543	26.0046	27.3857	25.98	26.2672	26.8507	26.5905	26.5822	26.0821	27.04				14	14	2	57.1	57.1	6.1	53.818	0	323.31	4801900000	491
23.9799	25.0098	24.7496	23.7607	23.8548	21.934	23.6113	24.4377	23.2465	24.7245	23.8746	24.6272	24.1713	23.684	24.3639	25.9034	25.5489	23.6371	23.7574	24.6033	25.2318	24.0961	24.7563	24.4314	24.5674	24.9335	24.6941	24.1163	23.8606	24.1797	24.2967	24.6489	24.2932	24.2492	24.489	24.6247				6	6	6	32	32	32	45.745	0	215.79	975130000	147
27.7434	28.5359	27.0669	27.8295	27.8947	27.1513	27.2276	27.0201	27.3759	27.4131	27.5728	27.1748	26.6679	26.8165	26.6404	28.3159	27.8746	27.6013	27.8413	26.4016	27.234	27.272	26.9025	27.5696	27.4348	27.3705	26.4092	27.331	27.6863	26.7123	26.4183	27.5595	27.2152	27.4846	27.1218	27.0274				6	6	6	55.8	55.8	55.8	16.832	0	150.93	8013300000	338
28.9749	28.8287	28.6229	28.5618	28.2628	28.1947	28.3292	28.9706	27.9259	29.2719	28.3191	29.0022	28.5992	28.4695	29.4931	27.8746	27.4537	29.009	28.9086	29.0638	27.9206	29.208	28.963	28.6543	29.0459	29.0147	28.658	28.8901	29.2759	28.653	29.1066	29.236	28.5809	29.3764	28.0633	27.9083				18	18	18	56.3	56.3	56.3	66.193	0	323.31	19272000000	714
26.0126	25.7406	26.0973	25.5468	26.0733	25.7639	25.4314	25.6987	25.7953	25.6135	25.0721	25.8134	25.756	25.5386	26.4041	25.1004	23.6748	26.2668	26.3346	25.5919	25.5716	25.7302	25.7804	25.8311	25.9397	26.1976	25.716	25.7795	25.4429	25.4579	25.502	25.4568	25.685	26.1413	24.7816	26.086				8	8	7	24	24	22.3	60.13	0	57.734	2167700000	157
23.2245	24.3213	24.0465	23.9393	23.5049	24.4548	24.8678	24.999	22.3023	24.0555	23.1718	23.7225	24.2976	24.7538	24.8065	24.8811	24.7605	24.4321	24.1086	25.6076	23.7978	23.9829	23.4264	22.9804	24.6517	24.298	24.8341	24.1997	23.7139	24.2706	24.0993	23.4428	23.5258	24.1081	23.5235	23.8998				27	27	27	18.4	18.4	18.4	254.41	0	104.42	802390000	199
27.5511	27.588	28.0038	28.058	27.6657	27.0008	27.6766	26.3017	26.936	27.2826	27.1435	26.7294	26.7066	26.6873	27.4551	26.6611	26.3807	27.2051	27.8502	26.5717	27.5168	27.7241	27.293	28.0031	26.9905	27.0129	26.3836	27.6463	27.0634	26.8198	26.7419	27.6099	26.7411	27.2935	26.8727	27.1681				7	7	7	66	66	66	21.868	0	185.98	6588100000	242
27.2186	25.2337	25.7699	23.8362	25.793	26.8175	26.1417	26.549	26.1229	25.5094	25.474	25.6696	26.3171	25.9556	25.2565	24.8759	24.8495	26.4702	26.0468	26.0325	25.3768	25.7952	25.9553	24.8116	25.0542	25.3308	24.8326	25.2174	26.5173	24.086	24.6951	23.5407	22.1387	25.4946	25.8809	25.4492				5	5	5	43.2	43.2	43.2	13.757	0	282.28	2531200000	174
24.473	25.2071	25.7052	25.3205	25.4846	24.9871	25.0525	25.4159	24.7771	24.4096	24.7812	25.8275	25.9204	25.6983	25.6563	24.4857	24.5603	25.5136	25.6621	25.6139	25.0618	25.851	24.9616	25.2034	25.4581	25.4583	25.2482	25.6392	25.0065	25.748	24.6873	25.964	24.9932	25.3755	25.0806	25.7095				8	8	6	26.8	26.8	22.3	49.301	0	15.972	1674700000	139
28.739	28.4249	28.0349	28.7014	28.4235	28.1726	28.0326	28.1037	27.7945	28.0869	27.7007	27.7525	27.6415	26.903	27.2979	27.7754	26.852	29.0794	28.7035	27.2328	28.2221	28.3337	28.3624	28.6316	28.4513	27.9453	26.1587	28.1943	28.3469	27.2646	27.2036	28.2041	27.2855	28.3657	27.6379	26.9281				5	5	5	58.8	58.8	58.8	12.774	0	323.31	11535000000	282
25.8591	26.9289	27.3651	26.9558	27.1505	27.4441	25.9064	26.8164	27.4921	27.4314	26.9247	27.0634	27.0966	28.1033	28.1504	26.5667	26.8846	26.9954	27.0863	27.8032	27.4907	27.0392	26.7329	26.5336	27.3709	27.6024	28.0331	27.6134	25.5575	27.8734	28.1553	27.0199	27.868	27.4484	27.4514	27.2576				47	43	40	32.4	31.1	29.4	275.66	0	323.31	6577300000	639
25.4794	26.2623	26.7698	25.4811	24.8399	25.9623	25.9864	26.218	25.5034	25.814	25.9796	25.2508	26.2194	25.5694	26.3009	27.2484	25.7642	25.4162	25.4749	26.6157	25.5409	25.4893	25.8126	26.0863	24.7377	24.6165	26.0446	26.4545	25.5356	26.3331	26.487	24.7384	25.6231	25.2799	26.0376	24.9992				12	12	12	44	44	44	51.712	0	129	2621000000	185
25.1187	26.621	26.7412	25.9478	25.0515	26.7567	26.685	26.5673	26.3378	26.1093	26.2924	26.6636	25.7799	26.5194	26.3917	26.7383	26.6688	25.5199	24.7884	26.9825	26.6136	26.4177	25.8091	24.6352	26.3791	25.9616	27.1159	26.3974	25.9388	26.8002	26.7295	26.066	26.5855	26.0639	26.2052	26.0227				5	5	5	33.5	33.5	33.5	24.593	0	323.31	4602300000	222
24.339	24.1541	24.8833	25.0317	24.8764	24.8631	25.1734	23.443	24.3114	24.646	24.3139	24.6514	24.5737	24.6802	25.1811	24.1468	23.6825	24.5839	25.4496	23.8775	24.5863	24.9852	24.6523	22.8204	24.2934	25.1124	25.109	23.4795	24.5963	24.793	25.3361	24.6173	24.4636	24.9919	23.564	25.2653				5	5	5	24.8	24.8	24.8	38.169	0	22.264	1114500000	173
26.8365	25.8894	26.9784	26.7015	26.1123	26.4837	26.4281	26.7671	25.6227	26.2554	26.3152	26.2707	26.5829	26.2357	26.3571	26.6588	26.2757	26.3209	26.2864	26.8536	26.4145	26.5513	26.1656	26.5116	25.5468	25.0635	26.4843	26.8073	26.2386	26.7381	26.5698	26.2008	26.1443	26.0269	26.6935	25.3248				11	11	11	48.5	48.5	48.5	30.241	0	239.24	3662600000	345
26.8561	28.1126	26.8482	26.6171	25.9748	25.457	26.3229	26.5072	26.0266	26.3704	26.0241	26.0367	25.9985	25.308	26.1733	25.9515	25.6533	26.5227	27.1135	26.3481	25.2406	25.3701	26.4811	26.7717	26.6378	26.3626	25.5671	26.7772	26.6085	25.957	25.6962	26.6865	25.7069	26.3987	26.3251	26.0874				4	4	4	30.3	30.3	30.3	20.117	0	28.36	3609000000	126
27.478	27.2953	27.1378	25.7406	26.2368	26.4592	25.6276	27.1635	26.3358	26.7174	26.368	26.1083	26.874	25.8944	26.924	27.4305	27.0137	26.1826	26.5754	26.6449	26.8984	26.9665	26.302	27.4734	26.5843	26.5204	25.677	27.1547	26.8508	25.9172	26.0433	26.7135	25.4681	26.5973	27.4168	26.008				3	3	3	48.3	48.3	48.3	10.058	0	129.42	6283600000	241
24.1758	25.3183	25.6575	24.7785	25.0713	25.068	24.9894	24.421	22.3441	25.3165	24.3537	25.017	24.4442	24.0711	26.3424	25.7136	26.3053	22.7462	24.4495	26.2181	24.7012	24.9768	25.2022	21.9171	25.4148	24.6098	25.9942	25.1552	24.7779	25.8338	25.8162	25.2254	24.9415	24.7661	25.007	22.4112				21	21	21	26.3	26.3	26.3	145.83	0	320.51	1635900000	206
25.1798	26.2332	26.7457	26.1036	26.3574	25.9106	25.9042	25.7761	25.6948	26.4246	25.6823	26.5447	25.631	25.9179	26.9394	27.0076	26.8968	26.0219	25.9584	27.0514	26.2052	26.004	26.4878	25.6073	26.6375	26.3657	26.6768	26.5923	26.3376	26.7854	26.8344	26.4051	26.1838	26.6188	25.938	25.8355				40	40	40	27.1	27.1	27.1	244.5	0	323.31	3554600000	712
24.9546	25.6829	24.4917	25.6931	25.751	21.6312	25.0881	25.2889	25.1276	25.4183	24.6762	25.0307	25.3247	25.3797	25.3635	24.5625	23.7865	25.5547	25.1787	25.525	24.8683	25.6811	25.6615	25.9446	25.084	25.719	25.1373	25.5825	25.3166	23.9547	25.529	25.4642	25.212	25.0609	25.5933	25.7106				6	6	6	31.9	31.9	31.9	35.611	0	273.66	1585600000	114
26.0702	25.2159	25.5862	26.3663	24.7867	26.5582	27.5233	26.8614	26.2122	25.2097	26.0084	25.8798	26.6492	27.0382	26.0678	25.4369	25.6161	26.4621	24.5714	26.8765	25.5216	24.7479	25.6932	25.1858	25.2567	23.1238	25.8175	25.2445	25.7819	25.7652	25.6082	25.3771	25.6906	25.5369	25.4618	24.4543				14	14	13	45.9	45.9	43.7	46.659	0	323.31	2605900000	214
25.6917	26.7083	26.792	26.474	26.6911	26.3623	26.5135	26.76	25.2439	26.1264	26.6773	27.386	26.6539	26.2103	26.1145	26.3952	26.2754	26.5273	26.1177	26.5872	26.8751	26.6106	25.9488	25.8321	26.3966	27.0822	26.6344	26.6155	25.902	27.0338	26.7548	26.2689	26.767	26.4441	26.6127	26.4001				4	4	4	21.3	21.3	21.3	21.614	0	278	5466900000	302
23.5745	24.2118	24.6726	24.6987	25.2936	22.6792	25.2711	24.1735	24.3603	25.2237	24.2399	24.6922	23.7886	23.4541	24.5646	24.0379	24.5624	24.9709	23.2953	24.789	24.4425	24.4809	24.2104	24.0383	24.2028	24.314	24.7617	24.5333	23.5914	24.5173	24.9	25.1974	24.9778	24.4064	23.3672	23.5784				9	9	9	31.6	31.6	31.6	47.355	0	189.33	957180000	119
26.6999	25.0279	25.6309	25.5582	25.3028	26.4898	25.231	25.3641	25.0863	26.2333	24.9638	24.8015	26.1795	25.8301	26.6231	24.5523	25.4577	25.4924	25.2635	26.2685	26.3243	25.7517	25.9566	26.7025	26.2315	25.9835	25.4153	25.8146	25.3198	26.0262	25.8318	26.6189	25.0181	26.1619	26.2608	25.9182				6	6	6	26.9	26.9	26.9	37.432	0	323.31	2333300000	66
24.0631	23.8641	25.4736	25.3973	25.2264	24.65	24.6655	24.5559	24.0267	25.2279	24.2219	24.9874	24.3427	23.4248	25.2493	23.6326	23.7191	24.7152	24.8781	25.4332	24.4269	24.5462	25.0748	24.991	25.3477	25.0178	24.739	25.1862	25.4851	25.1236	25.0255	25.3247	24.3348	25.0721	24.1794	24.4013				7	7	6	13.6	13.6	12.1	75.022	0	183.43	1180800000	145
24.5181	24.4809	25.5331	25.5047	25.254	25.0881	25.2678	25.6544	24.4075	25.3589	24.5306	25.0708	25.28	24.2987	25.0448	24.5521	24.1554	25.216	25.4414	25.564	24.8595	25.4967	25.3757	25.3174	25.404	25.2475	24.9166	25.1223	25.5276	25.2272	25.2757	25.5699	25.1157	25.3162	24.8333	24.9154				7	7	7	12.6	12.6	12.6	112.13	0	323.31	1614800000	147
25.3708	25.8974	25.8247	25.4125	25.215	26.1786	26.5188	25.7266	26.3501	25.6329	26.342	25.5696	26.0361	27.452	26.3842	25.5039	25.456	25.7108	25.3088	26.3001	26.1663	25.6351	24.9675	24.8988	25.9222	25.3503	26.6387	25.6709	23.9897	25.9612	25.9566	25.5325	26.2785	26.0884	26.375	25.4005				23	23	18	40.1	40.1	32.6	103.96	0	268.1	2581100000	283
24.4588	25.0045	25.635	23.9252	25.2241	25.137	24.5159	24.7893	25.2796	24.8259	25.3379	24.8479	24.7006	25.5099	25.1613	23.1742	26.4006	24.3059	24.8694	25.2704	26.2123	25.4439	24.5598	24.3138	24.6678	24.4687	26.1888	24.9001	24.7151	25.4224	24.8275	24.0874	25.6359	25.0835	25.0591	25.0653				9	9	9	17.3	17.3	17.3	105.75	0	323.31	1509800000	176
23.7039	23.4728	24.4268	24.0272	25.0056	24.0929	23.4857	23.7826	23.2801	24.0669	23.3627	25.1126	23.3742	23.2239	23.4501	24.5958	24.9525	23.3639	23.9195	23.8584	26.3392	24.8753	24.2116	24.0192	23.9203	24.3389	23.7297	24.1661	23.8235	24.1294	23.8412	24.1552	23.4869	24.4751	23.2247	24.0901				5	5	5	16.4	16.4	16.4	51.466	0	104.51	1064300000	117
25.3945	25.0809	25.4171	25.6635	25.3956	25.4539	25.7317	25.5551	26.2026	25.1984	25.5908	24.9077	25.0332	25.5085	24.8811	24.83	24.7606	25.7813	25.5677	25.3194	25.377	25.1646	24.7443	25.515	24.775	23.77	25.116	25.2284	25.2207	25.2266	25.1023	24.9461	24.7041	24.9156	25.0065	25.0731				3	3	2	17.3	17.3	12.3	27.228	0	97.914	1544900000	77
27.2347	26.6878	26.7739	27.4802	26.7837	26.2168	26.9472	26.5938	26.1157	26.7075	26.0941	26.1735	26.5525	26.4666	26.03	26.4333	25.5437	27.0684	27.4585	25.5432	26.577	26.7867	26.77	27.045	26.4348	26.9429	24.8511	26.8309	26.987	25.7323	25.7255	26.7732	25.6698	26.6013	26.0121	26.0227				6	6	6	72.1	72.1	72.1	14.874	0	323.31	3919200000	149
28.9754	28.9197	28.3594	28.6649	28.6206	28.5978	28.9181	28.4387	28.8681	28.5534	28.6135	28.513	29.0695	28.4627	28.0393	28.4553	28.5368	29.2674	29.0773	28.0808	29.0986	28.8565	28.6345	28.7918	28.177	28.7258	27.6168	28.6122	29.2469	27.8177	28.0452	28.8258	28.1583	28.6302	28.1223	28.0828				12	12	12	78.7	78.7	78.7	27.547	0	323.31	17029000000	489
23.1544	24.0642	22.8461	21.6458	23.1969	23.691	23.1932	25.3176	22.3376	23.3913	23.5769	24.0853	23.6209	23.1273	22.9961	24.5819	25.0532	23.3554	22.919	24.9996	24.1139	20.9466	22.8695	21.9867	23.9885	25.1549	23.1834	22.4169	23.3857	22.6381	23.4904	23.0618	23.9178	23.1405	23.2114	23.3843				14	14	14	32.9	32.9	32.9	68.617	0	191.84	567590000	102
25.4925	25.6316	25.1834	26.0192	25.8712	25.2861	25.0624	25.1838	24.9266	25.4317	24.9876	25.6568	25.4541	25.3124	24.8555	25.671	25.0348	25.0131	25.3888	25.0785	25.5557	25.5314	25.2681	25.0823	25.1586	25.597	25.42	25.023	25.2891	25.2797	24.7642	25.3758	25.7009	25.2841	26.0561	26.0775				16	16	15	24	24	23	119.52	0	323.31	1874800000	234
25.1897	24.544	25.4792	24.0259	25.2749	24.938	24.583	25.5836	24.6809	26.1673	23.2349	25.2984	25.5453	23.66	24.7859	27.6112	26.3578	23.4266	25.4314	25.0937	27.0843	24.8312	24.7267	25.0772	25.3588	26.1596	24.0106	25.0827	25.3444	23.0153	24.3027	25.5774	24.0748	23.5989	25.2365	25.2022				2	2	2	19.7	19.7	19.7	23.003	0	323.31	2692400000	104
23.5152	23.7813	24.1682	24.948	25.1097	25.0482	25.3596	25.4487	24.3512	23.5556	25.0848	25.7002	25.794	24.4906	25.1902	23.7351	22.754	25.1968	24.8563	25.0403	24.8197	24.9785	25.3381	25.1359	24.9102	24.7438	24.9605	24.8312	24.8748	24.8311	25.303	23.7177	24.8368	23.8179	25.4528	25.6288				4	4	4	19.8	19.8	19.8	32.339	0	21.038	1233500000	64
24.5838	25.5048	25.5366	25.3301	25.7064	24.6507	23.6012	25.1557	25.2412	25.462	24.7472	25.8379	24.7157	24.5995	25.2002	27.2575	25.6674	24.9147	25.5053	25.0169	25.3877	25.3403	25.266	25.2273	25.8334	26.5663	25.5047	25.2113	25.2769	25.4035	25.1893	26.0003	25.3	25.2428	25.0615	25.75				12	12	11	16	16	16	122.41	0	275.88	1997600000	252
22.2673	24.185	22.2359	22.9608	23.1709	23.4104	23.8893	22.8264	23.0988	22.1016	22.9149	22.8853	22.8731	23.4721	22.1857	25.1241	25.9864	23.4841	22.3209	23.6843	23.5104	22.5733	22.3422	22.7036	23.1927	23.1574	23.6279	22.833	22.808	22.2719	22.581	22.2588	23.0174	22.7293	23.3729	22.8529				11	11	10	12.9	12.9	12.2	119.75	0	192.04	531060000	107
26.9612	22.5956	25.3867	25.8279	25.6917	26.5545	27.5471	25.7176	25.3996	25.0257	26.0534	25.7294	25.2979	26.2489	25.3059	26.1603	24.3401	26.4152	25.4401	25.7582	25.1991	25.6366	24.9651	25.3034	24.8293	24.0169	24.967	25.3038	25.7208	25.2185	25.669	24.8562	25.1836	25.9329	25.4222	24.9141				6	6	6	35.8	35.8	35.8	27.873	0	44.7	2086600000	71
26.0677	26.3187	26.2216	25.8609	26.3241	26.1118	25.8123	25.9832	26.1256	25.8805	25.6084	25.8146	25.9658	25.788	25.7602	26.1465	25.7431	26.4799	26.1368	25.7524	25.7416	26.4481	26.1028	26.2096	26.0436	26.6934	25.3064	26.1317	26.3918	25.3223	25.1615	26.0493	25.3498	26.0983	25.434	26.8156				11	11	11	31.7	31.7	31.7	58.022	0	323.31	2925800000	333
26.5623	27.7108	26.2716	25.0767	26.6655	25.6428	24.9885	26.3546	25.9356	26.2102	26.4696	25.8058	25.9402	24.7198	25.2052	26.9859	27.5765	26.1127	26.0255	25.7749	26.4649	26.4376	26.0281	26.8564	27.1395	27.1025	24.4744	26.4196	26.711	23.7125	24.5301	25.9474	25.045	25.944	27.0823	26.9914				4	4	4	71.9	71.9	71.9	10.403	0	323.31	4933100000	349
25.0309	24.9083	24.9222	24.8062	24.5655	25.785	25.2982	25.3724	24.2393	25.5368	25.1769	25.6851	25.5493	25.4487	26.0351	24.444	25.1194	25.1508	25.0959	25.6382	25.4929	25.4683	25.1487	24.0607	25.0987	24.8928	26.5275	25.2028	24.8153	25.4024	25.7959	25.0651	25.8982	25.611	25.7423	24.7835				23	18	18	38.7	31.3	31.3	105.36	0	163.77	1749300000	197
24.7196	24.9893	24.1768	24.503	24.4927	24.481	25.0679	25.3542	24.6266	25.2623	25.2356	25.2723	24.7388	24.5008	25.0812	25.0385	23.9119	25.6784	23.9015	25.1915	24.6495	25.6625	25.3547	24.8719	25.0935	26.2626	24.8667	25.071	25.5699	24.8123	25.1228	25.5541	23.4377	25.2179	24.5547	25.3959				7	7	7	17.9	17.9	17.9	70.678	0	22.853	1335400000	98
26.6277	27.6663	25.7341	26.6917	26.9043	26.3656	26.5182	25.4367	27.1674	25.9652	25.4871	26.3202	26.2148	27.4519	26.4814	26.5657	27.0098	27.5298	26.9644	25.3459	26.8232	26.4571	26.6192	26.5731	26.4224	26.8805	25.5647	26.7032	26.6761	26.143	26.1927	26.5041	26.5048	26.3445	25.727	25.8518				8	8	8	50.9	50.9	50.9	29.644	0	323.31	4418200000	175
26.0108	25.1431	23.8467	25.6838	25.6636	24.9162	24.6723	24.8807	24.7941	25.7618	25.361	25.6078	25.0434	25.1412	25.2523	24.6128	23.9672	25.2134	25.5159	25.2388	25.0926	25.6072	25.4298	25.9436	26.1276	25.8611	25.1247	25.7711	26.1172	25.4445	25.0029	25.9945	25.2689	25.7109	24.6319	25.2932				8	8	8	29.1	29.1	29.1	47.46	0	323.31	1685000000	122
29.9933	29.0154	29.601	29.2617	28.8814	29.5135	29.2936	29.7765	29.3571	29.8352	29.1981	29.913	29.3887	29.32	29.6208	29.272	29.2351	29.2202	29.2353	29.4529	28.7252	29.4301	29.9073	29.3085	29.0422	29.0062	29.9321	29.2837	29.4281	29.1154	29.5656	29.4766	29.3062	29.8622	29.8221	30.1622				16	16	16	54.8	54.8	54.8	36.688	0	323.31	31214000000	672
26.4138	23.9625	24.0439	23.8505	23.6128	26.292	23.1686	28.7428	23.3576	23.3469	23.583	24.6307	24.4721	24.8604	25.7343	24.6318	24.8479	26.3919	24.4392	26.9035	24.5239	22.8536	24.6697	25.0406	25.6354	25.6029	22.441	25.9065	27.0169	22.2473	22.9827	24.3975	24.0316	21.5359	23.5708	21.4099				16	16	16	52.5	52.5	52.5	54.861	0	323.31	1788200000	144
26.6979	26.6274	27.4792	27.2442	26.335	27.3554	27.5627	27.5904	26.7965	27.1638	27.1371	27.0433	27.7589	27.5447	27.8761	26.9906	26.5645	27.2478	26.4059	27.6966	26.7549	27.1215	26.6034	27.1288	26.398	25.8661	27.2104	27.7852	26.3917	27.719	27.8338	27.0494	26.9439	26.8359	27.6834	25.5261				18	18	18	47.1	47.1	47.1	61.397	0	194.92	6449500000	348
25.508	25.1172	26.9662	26.1203	25.7415	26.2935	26.3969	26.6978	26.1481	26.4597	26.4103	25.8531	26.3406	26.7256	26.4748	25.9365	26.1496	26.0572	26.1863	26.0904	26.66	25.5533	25.9823	25.5891	25.4283	25.3993	27.1629	26.3176	26.0905	26.1848	26.7384	25.8753	26.9268	25.4598	26.0474	25.6037				10	10	10	66.5	66.5	66.5	31.628	0	199.12	3475300000	232
26.4538	26.0168	26.7385	25.858	26.6129	25.7282	25.7337	26.1649	26.0729	26.4708	25.921	26.6158	26.5395	24.9416	26.7304	26.1322	25.3952	25.7912	26.1825	26.2544	26.004	26.7576	26.4611	26.2633	26.5483	27.0632	25.8141	26.3412	26.6583	26.4727	26.6228	26.7221	25.9026	26.6557	26.0174	26.1664				8	8	8	35.5	35.5	35.5	51.7	0	317.49	3486000000	248
27.2904	26.3698	27.9201	27.099	27.2357	27.6399	27.4815	27.1419	26.5527	26.7209	26.5989	27.2018	26.5693	26.5043	26.9572	27.2975	26.1149	27.5807	27.5221	27.3448	27.2375	27.2165	27.1315	27.8291	26.3861	26.8992	26.4341	27.1871	26.9189	26.9488	26.6518	26.5201	26.5843	26.4033	27.415	26.5588				4	4	4	24.7	24.7	24.7	25.565	0	183.24	6759000000	281
28.375	26.9882	25.7964	27.3188	27.5598	26.415	26.5187	27.6812	26.4071	26.9229	26.5142	27.0435	26.4238	26.2458	26.7933	28.4508	26.8825	27.4392	27.5639	25.7598	26.5418	27.6116	27.9448	27.3649	27.6232	27.9879	25.9017	27.105	27.8626	26.0974	26.2813	27.4227	26.1267	27.4665	25.278	26.5225				5	5	5	60.4	60.4	60.4	15.936	0	323.31	6643000000	202
26.8112	26.0118	26.6031	27.0035	26.2002	26.8029	27.2747	26.7958	29.2484	27.2838	28.6756	27.5161	28.2691	28.1157	27.511	28.8555	28.2525	25.8278	24.6623	26.4802	27.534	25.5446	26.5956	25.3447	26.4776	23.8052	29.7051	26.7517	26.2672	27.332	28.6019	25.0026	28.881	26.4875	29.3645	27.4927				19	19	17	28.7	28.7	26.8	122.2	0	323.31	10638000000	473
28.0966	27.8003	28.2497	27.9435	28.6495	28.0525	28.0213	27.9869	28.3628	28.0948	28.1435	27.872	28.3995	27.804	28.0823	28.126	27.6508	27.7173	28.4309	27.5009	28.0578	28.4211	28.1189	28.3993	28.3002	28.4854	27.3792	28.3937	28.2711	27.3111	27.6132	28.2795	27.734	27.7371	28.6185	29.035				19	19	19	75.4	75.4	75.4	32.118	0	323.31	13745000000	679
28.4327	27.1881	26.4713	26.6404	27.0261	26.8474	26.8119	27.3933	27.1202	27.3838	26.934	26.919	26.9291	27.007	25.208	26.6725	26.1715	27.2199	26.8734	26.3149	26.2137	27.1397	27.8085	26.8309	26.5538	27.1529	26.3061	27.0877	27.9955	25.517	26.7313	27.3006	26.1763	27.0177	27.7465	28.0507				8	8	8	53.7	53.7	53.7	24.579	0	172.69	6079200000	296
31.0721	29.9101	30.6277	30.6387	30.8046	30.3975	30.5296	31.0396	30.6825	30.9143	30.5472	31.0885	30.8941	30.5338	30.7613	29.9271	29.4896	30.8827	30.9279	30.6532	30.0576	30.7044	30.8547	30.4669	30.4438	30.8907	30.5261	30.6675	31.0184	30.4549	30.5925	31.1263	30.304	30.7808	30.8891	31.1097				20	20	17	61.4	61.4	55.9	44.614	0	323.31	71269000000	1143
22.5574	23.3237	25.1676	26.1101	24.1867	24.8333	24.7018	24.1108	27.226	26.4678	27.355	25.9943	26.6098	26.8215	26.1703	27.1165	26.7478	24.1384	22.6889	24.5883	26.3637	23.5892	24.9254	23.0735	25.7722	23.5905	28.039	25.1867	24.3139	26.9166	26.8603	21.8458	28.8286	25.4878	27.3661	24.9199				14	14	14	27.2	27.2	27.2	85.532	0	139.62	3126700000	149
28.4667	27.0076	26.9113	29.5961	28.2379	28.7093	29.0732	27.6132	30.5547	28.9694	31.2048	28.9573	29.6702	30.2145	28.309	29.8153	29.2943	27.1806	26.6169	26.6385	29.8269	27.6009	28.5018	25.1253	28.1125	26.5819	30.0868	27.353	28.3017	28.6749	29.2557	26.8927	29.4436	27.6546	30.7053	28.6845				15	15	15	51.2	51.2	51.2	46.736	0	323.31	23134000000	536
27.2198	26.3685	26.5193	29.5489	27.6243	28.2617	30.1581	25.4425	30.5912	27.9728	30.167	28.0163	28.6367	30.3366	26.9995	28.6332	28.4091	27.178	26.5284	26.0756	28.3988	26.7558	28.0886	25.9853	27.4259	24.8328	28.946	26.9882	26.8642	27.6381	27.9999	25.6265	28.5537	26.8817	29.8616	29.4698				13	13	13	43	43	43	47.65	0	323.31	14962000000	398
24.1807	24.0819	23.7561	25.5632	22.1933	25.0279	24.9817	24.146	27.0842	24.8824	26.4484	25.3704	27.6469	24.8203	24.2496	28.1438	26.1236	23.6316	21.9894	23.9872	26.2187	24.881	24.445	23.4756	24.4241	21.4044	27.0858	24.989	26.3449	25.7868	27.2209	23.7545	26.7163	25.1096	28.35	25.0324				10	10	10	34.2	34.2	34.2	53.154	0	323.31	2961700000	245
25.908	25.2075	26.9256	27.3193	25.4721	27.7713	25.4318	24.5575	28.7522	26.919	28.5375	27.1803	27.818	28.5356	28.6893	28.4062	28.4509	26.2597	24.3913	27.7452	28.2507	25.9001	26.7123	24.2522	27.2249	26.2026	29.5885	27.7162	24.2316	28.3815	28.6997	24.7163	29.9074	25.7887	29.4963	27.7865				36	36	31	40.5	40.5	35.8	163.29	0	323.31	10029000000	640
26.8913	27.1136	28.7911	28.8208	27.4571	29.1314	28.444	27.8521	30.3972	29.4187	30.1382	29.3465	29.6597	30.69	29.5422	29.7617	29.8273	26.9552	26.4028	28.9979	29.5821	27.5019	27.014	26.0431	28.5291	27.3672	31.1438	28.8434	26.8547	30.4069	30.3568	26.6525	31.5494	28.7346	30.3522	28.7253				58	58	55	52.7	52.7	50.8	187.15	0	323.31	34944000000	1340
29.6909	27.6279	27.6361	30.1547	28.4371	29.512	30.3359	28.0868	30.4999	29.2794	31.2125	29.638	30.38	29.8256	29.3605	31.0947	30.6998	28.1147	27.2843	27.9594	30.6987	28.3784	28.2809	28.1226	29.0537	26.4494	31.2288	28.9435	28.1132	30.339	30.0052	26.9859	31.3535	28.7419	30.1295	29.0817				7	7	3	80.4	80.4	32.7	11.765	0	323.31	45104000000	924
28.87	25.7909	23.9814	30.2163	28.7504	28.9226	28.772	24.9953	29.9881	28.0994	31.0798	29.4797	29.0729	28.7303	28.5273	30.3415	30.5916	28.8222	24.7545	28.063	30.0285	27.9334	28.0832	27.8205	29.155	25.6436	29.9287	28.4373	25.7934	30.1435	29.8687	26.7852	31.2264	28.8113	29.3721	30.049				9	9	7	44.5	44.5	32.6	37.654	0	323.31	32703000000	489
29.0635	28.7959	29.6381	29.0398	29.8146	29.036	27.6673	28.8338	28.2988	29.0211	29.1744	28.2689	27.8894	28.6761	28.8661	29.0906	28.1503	28.6738	28.9639	28.8619	29.0769	29.3407	28.5072	29.1122	27.9747	28.8926	28.3133	29.1019	28.9553	28.7819	29.0038	28.5432	28.6896	28.6975	29.3195	30.1538				7	7	6	39	39	34.3	28.607	0	323.31	21726000000	575
25.9306	25.5662	26.4272	29.6778	28.5978	28.6359	26.5123	26.8764	31.6764	30.5341	31.4608	28.1382	31.2069	31.5013	30.5019	27.644	31.534	28.2827	25.6831	25.4735	30.0647	29.1812	27.966	23.7616	30.4454	26.3876	31.5987	28.0233	27.7376	30.8429	29.6255	26.0878	33.2248	28.9061	28.307	25.7562				14	14	14	17.3	17.3	17.3	138.94	0	251.32	54734000000	227
27.1179	27.6725	29.3201	26.9714	27.7037	29.2358	28.4844	27.3745	27.9604	28.5578	28.9129	28.164	28.0702	29.1346	29.1532	28.3141	29.243	27.2456	26.6457	28.6465	28.3386	27.6417	27.2569	27.1964	27.2899	25.3766	28.7619	28.9298	26.2674	29.4083	29.7054	26.9118	28.9651	28.1354	28.2739	25.6946				11	11	11	22.7	22.7	22.7	74.139	0	323.31	15093000000	239
27.447	27.529	27.5408	28.217	26.9423	27.5055	26.9316	27.6566	29.3207	28.1356	28.8691	28.1237	28.5181	27.9935	28.1574	30.0081	29.3324	26.9786	27.1969	27.7797	28.7074	27.557	28.1831	27.4518	28.0151	26.7839	29.7725	28.2545	28.5773	29.2664	29.4364	27.3956	30.3879	28.1804	29.2872	27.939				14	14	14	43.8	43.8	43.8	30.777	0	323.31	17850000000	519
25.5673	23.9587	23.3978	25.4167	23.3892	24.3926	25.4693	25.8822	26.3064	24.8582	26.1717	26.6668	25.4676	25.0031	24.4385	24.4575	23.8845	25.2464	25.1747	24.6159	24.4518	23.8821	25.8666	24.0025	23.9945	23.6737	24.7185	24.5742	26.067	25.3898	25.6113	24.9384	25.9419	24.7523	24.4603	23.8899				4	4	4	20.5	20.5	20.5	36.154	0	323.31	1486200000	102
26.3198	25.2627	25.1937	25.7596	25.35	24.7123	23.2022	25.0436	25.2082	24.7241	25.9316	25.6211	25.5811	25.8409	25.2008	26.7594	25.2975	24.8104	25.5626	25.3331	27.6031	24.7023	26.5391	26.0873	26.1502	25.5298	26.501	26.263	27.6775	26.6455	26.5538	25.3482	25.8404	26.463	26.8278	26.4573				3	3	3	43	43	43	11.175	0	323.31	2768500000	99
25.7513	25.4109	26.5453	28.9479	27.5285	28.4168	29.0561	25.5938	28.4246	28.0323	29.5483	28.428	27.8428	29.2375	27.9212	27.3487	29.567	25.182	24.0246	26.9398	28.9855	26.7533	26.7128	26.0294	26.7403	24.9388	30.3463	27.5649	25.1585	28.534	29.5422	25.2503	29.9886	27.4251	31.7695	27.3904				14	14	14	21.5	21.5	21.5	94.972	0	323.31	17810000000	531
26.0908	25.7668	27.1262	28.9324	28.6077	29.5512	30.3899	26.3891	29.7916	28.8427	30.0735	28.8817	27.8445	30.0074	28.7285	28.3034	29.8272	26.5922	25.2176	28.2964	28.5082	27.2861	27.9427	27.4934	26.8525	23.6366	30.5178	28.2855	25.0885	29.1429	30.3458	25.5828	30.4316	28.3944	32.6509	29.3534				19	19	18	57.6	57.6	55.6	55.928	0	323.31	25434000000	566
23.068	23.0151	25.1104	27.6285	24.4846	28.2853	28.7804	22.2647	28.1904	28.2844	29.1994	27.6235	27.4746	29.5271	28.0481	25.7816	27.5037	23.6278	21.8418	27.1732	27.7932	26.0614	26.507	24.506	26.1891	24.0757	30.1273	27.2539	24.2529	28.3968	29.5663	22.5618	29.6016	26.8967	30.9083	26.6622				11	11	11	43.2	43.2	43.2	49.496	0	323.31	10911000000	286
28.8794	27.4347	29.3944	29.3864	28.294	30.0996	29.4099	29.252	31.4441	30.143	30.3305	29.9293	29.7135	31.1185	29.347	29.6178	30.51	27.7854	29.1934	30.1273	30.0942	28.3438	28.8545	28.4512	29.6861	24.1648	32.609	29.6934	28.0361	30.6508	30.947	26.9242	31.1454	28.8051	31.7385	28.7544				47	47	2	36.6	36.6	1.3	259.21	0	323.31	47469000000	1502
25.2309	24.9787	25.3274	26.1345	26.0146	25.2829	25.2053	25.2353	27.1566	25.3202	26.1778	25.7964	25.4634	25.7912	23.8649	26.7086	26.9172	25.9365	24.9044	24.5732	25.9869	25.7366	25.055	25.6078	25.868	24.5074	25.0436	25.2355	25.4228	25.7664	25.5671	24.01	26.379	25.685	26.0852	26.2201				7	7	7	29.8	29.8	29.8	38.999	0	105.26	2541500000	203
29.9289	27.8661	26.0791	29.7648	27.8701	28.7061	30.0363	27.5116	31.4369	28.0613	30.5093	28.3574	27.3342	29.6541	27.9401	29.9599	27.3487	28.4661	26.9107	25.4774	28.205	27.0677	30.1127	25.8928	28.6037	27.7913	27.7737	27.38	29.9629	27.6076	28.1314	25.7934	25.6359	29.0501	29.1553	31.2873				7	7	5	40.8	40.8	32.3	23.511	0	323.31	20314000000	225
27.459	25.7634	25.786	26.1616	27.093	26.7804	23.0559	26.9263	27.8522	27.6796	26.7223	26.7861	27.5067	26.2888	25.8928	28.3149	27.5351	25.801	27.4157	26.5142	27.9793	27.8003	27.5787	27.3467	27.9976	27.2837	25.4546	27.1806	29.0984	26.9819	27.6408	27.1742	28.6251	28.5183	27.8231	26.4049				9	9	9	65.3	65.3	65.3	15.887	0	254.2	7401800000	196
25.6673	23.7024	24.2854	25.2918	25.4578	25.4328	26.186	24.909	25.9461	24.3621	25.539	24.4487	24.7429	24.4672	23.9457	22.8834	23.9049	24.58	25.1234	26.1382	25.2602	24.1483	26.6309	24.1155	23.843	24.284	26.5881	21.9268	24.6064	23.0568	22.9183	25.0271	24.4686	24.1143	24.7445	25.0495				11	11	11	20.5	20.5	20.5	84.87	0	76.823	1242900000	105
27.6737	26.5634	27.9455	27.0749	27.3298	28.0104	26.6382	27.8782	29.7738	28.2902	28.9303	28.1721	29.3529	28.6235	29.4228	29.5072	29.6223	26.259	26.9467	28.6986	28.4645	27.2394	27.5873	26.9854	28.4804	27.2195	29.6381	28.1758	28.2537	28.7365	29.7131	26.8784	30.5753	28.0946	28.9268	27.1792				19	19	19	36.2	36.2	36.2	77.063	0	323.31	17901000000	542
32.3272	29.9163	29.3803	31.128	30.4215	30.7643	31.4796	31.9867	31.8049	31.1121	31.2166	30.0431	29.0071	31.5857	28.1271	30.6944	27.7391	31.5182	31.2166	30.1952	30.8093	30.194	31.3111	28.2044	30.058	30.4049	28.1921	29.6327	31.4098	30.379	29.735	30.626	30.5223	31.4322	32.324	29.2353				7	7	7	43.4	43.4	43.4	20.019	0	139.69	71939000000	343
26.775	26.8135	27.969	27.2994	27.1344	29.2522	28.4136	27.3347	28.7448	28.2366	28.9038	28.6145	27.7992	27.5569	27.0082	29.0382	27.4688	27.6361	27.3341	26.8005	28.2353	27.2201	28.0147	27.7461	27.0811	26.3423	28.2891	28.1017	27.9814	27.7391	29.1885	27.4449	28.8425	28.6278	31.1057	29.6973				6	6	6	19.7	19.7	19.7	54.305	0	323.31	13900000000	372
27.34	28.0075	27.2105	28.8816	27.6711	27.8923	27.3315	27.4116	28.7997	27.1454	27.1936	27.2062	27.4359	29.0737	27.8802	27.9979	27.5595	27.0082	26.9597	27.3283	27.9025	27.6649	27.0057	27.799	27.2723	26.8573	27.8188	28.0743	26.5916	27.8868	27.7531	27.7267	27.7813	27.8683	28.4097	28.7492				11	11	11	30.6	30.6	30.6	59.755	0	254.91	10538000000	454
25.2	22.9693	25.1625	25.2898	25.4087	24.6843	24.3762	25.2962	24.0695	25.0611	24.2397	23.9617	24.3287	24.7896	25.4206	26.254	25.1611	24.3444	25.6422	24.8871	23.3825	24.6328	26.0222	24.1327	25.3358	25.0566	23.8417	25.127	24.2509	24.9015	24.2821	24.7645	23.6785	24.8759	22.9984	24.5072				7	7	7	27.3	27.3	27.3	53.688	0	132.35	1346200000	131
30.3753	28.2781	29.4753	29.4226	29.7089	29.144	28.8773	29.8295	29.305	29.6257	29.4511	29.9287	29.6554	29.6108	29.5923	28.4863	28.833	29.0939	29.3418	29.0622	28.5044	29.3766	29.5412	29.2294	29.1946	30.4107	29.4078	29.2209	30.0373	29.0005	29.0649	29.9725	29.4386	29.4503	30.3147	29.6549				13	13	11	53.6	53.6	45.9	39.42	0	323.31	35605000000	562
30.788	28.4485	28.3751	27.8852	27.9735	29.9582	28.3643	29.8445	29.2924	28.2393	28.3003	27.4509	27.9213	27.8601	27.4647	27.7542	26.7778	29.1234	28.5064	28.3158	27.4551	28.3291	29.0651	28.7398	27.8573	28.6554	25.9037	28.1747	29.7851	27.354	27.4622	27.9751	27.8176	27.4416	29.992	28.73				4	4	4	56.1	56.1	56.1	11.139	0	323.31	16365000000	161
28.4376	27.9761	29.2036	29.6124	29.1166	28.9976	29.0678	28.1267	30.0991	28.2282	29.3622	29.0613	28.6957	30.4203	28.59	29.4346	29.5228	28.1593	28.1129	28.813	29.1776	28.299	28.0687	29.002	28.9475	27.9284	29.5576	28.8096	28.2636	28.8006	29.0021	28.2176	29.4027	28.7721	29.73	30.1938				18	18	18	55.8	55.8	55.8	38.714	0	323.31	25903000000	815
29.3156	27.4844	28.1108	28.0753	27.7319	30.6063	30.6706	31.0232	29.4126	28.3688	28.2135	29.0391	28.8807	27.724	27.9875	28.598	28.2601	29.2393	27.5421	29.9399	28.6346	27.8709	29.1168	27.9538	27.3172	26.2069	29.0385	28.3354	29.6292	28.7031	29.0445	27.9842	28.2077	27.5505	28.2848	28.6167				5	5	5	53.4	53.4	53.4	19.73	0	323.31	20595000000	338
22.8795	24.3672	24.1851	24.0656	23.9283	23.7033	23.142	23.7891	25.4452	24.0679	24.6132	24.5048	24.2762	23.4529	23.2764	25.2082	26.831	22.3606	23.8046	23.4801	23.7509	23.9403	23.4875	23.274	23.7452	22.5065	24.3905	24.422	24.3245	24.8465	24.4934	22.7884	26.4446	24.3324	27.2736	24.5541				6	6	6	14.1	14.1	14.1	59.578	0	164.74	1189300000	171
28.3648	27.5592	26.514	28.6796	28.4204	27.2128	25.88	26.3838	28.4226	27.6065	27.2281	26.6411	25.991	28.3003	26.5683	27.2834	27.4852	27.8987	27.7858	25.809	28.2238	27.3762	26.6706	26.9824	27.5645	26.0673	26.1326	27.282	27.0157	26.9023	26.7125	26.7749	27.4015	27.3416	26.3381	27.6754				3	3	3	24.2	24.2	24.2	17.935	0	265.83	7405500000	113
26.7991	27.2333	26.3897	27.897	26.5096	26.895	26.37	26.2536	28.7204	26.388	27.7251	27.0905	27.2454	26.8711	26.1084	28.2768	28.2012	25.2231	26.0365	25.4808	27.805	25.7084	26.3616	25.3205	26.6442	26.2753	27.2761	26.2924	26.6421	27.0739	26.8519	25.2932	28.1321	26.6688	28.2047	26.6665				11	11	11	32.3	32.3	32.3	54.253	0	323.31	5983900000	231
27.1211	26.9661	28.4036	27.3619	27.8586	27.8187	28.0992	27.033	26.2304	27.3075	27.0425	26.0446	26.6939	27.0738	27.7152	26.9338	27.2082	27.6267	27.6761	28.3123	27.6387	27.2831	27.5617	27.5054	26.622	27.4024	27.3401	27.9739	27.1299	27.5764	26.307	26.6749	26.0339	27.3285	27.044	26.8096				6	6	6	27.6	27.6	27.6	26.398	0	323.31	7975200000	196
28.2173	28.6979	28.6045	28.8709	28.4662	28.4469	28.4245	28.1387	28.5534	28.5293	28.1227	29.255	28.6059	28.1477	28.1467	28.8129	29.1944	28.9738	28.2503	28.0683	28.3188	28.0959	28.3506	28.8188	28.4137	28.9109	28.8418	28.0339	28.1856	28.5773	28.5129	28.8203	28.6691	28.5932	29.5443	28.7587				19	7	3	67.3	27	10.1	49.585	0	308.89	23583000000	480
32.9613	31.8018	32.3973	32.4464	32.2045	32.4265	31.8484	32.6853	32.4591	32.7376	32.3104	32.8725	32.2128	32.2034	32.2292	32.0928	31.7126	32.1682	32.3683	32.4833	31.9456	32.5013	32.9158	32.1425	32.4378	33.019	32.5137	32.3057	32.7049	32.3891	32.4524	32.7397	32.2671	32.5105	32.4834	32.7939				15	15	15	71	71	71	36.053	0	323.31	270820000000	1994
22.2542	22.6119	23.1761	22.9281	23.1503	22.6548	22.7518	22.9675	23.0512	22.8042	22.0529	22.4875	22.9582	22.9046	22.2776	22.7185	21.788	22.5663	22.8609	22.4964	23.0128	22.974	22.3067	22.3581	22.9534	23.5667	22.6599	22.3899	22.2508	22.199	22.2906	22.2626	22.6941	22.6176	22.2761	23.6506				4	4	4	13.8	13.8	13.8	51.657	0	15.519	263810000	64
27.7184	28.9942	27.9744	28.0418	28.298	27.5969	27.8409	27.6255	27.7152	27.558	27.5549	27.3048	27.3434	26.8851	27.0189	28.363	28.5418	27.9285	28.1095	27.1049	28.702	28.0736	28.0578	28.6548	27.7015	28.3864	26.6043	27.8039	28.0796	27.2808	26.9029	28.0001	27.4134	27.6453	27.6277	27.9028				11	11	11	76.1	76.1	76.1	28.315	0	323.31	13306000000	712
31.2874	30.1458	31.4464	30.5866	29.9083	31.2151	31.5411	30.5676	30.4008	29.84	30.7359	30.5481	29.9875	29.7719	29.4365	30.0196	29.836	30.5913	29.7951	29.2402	30.8514	29.5368	30.0335	30.0362	29.7401	28.591	29.5618	29.9507	29.9647	29.7028	30.1513	29.6989	30.1828	29.559	31.021	31.388				11	11	11	70.7	70.7	70.7	22.782	0	323.31	57616000000	848
25.858	25.8665	25.6137	25.4816	25.2472	26.3155	25.1567	26.3377	26.0507	25.0857	25.0486	25.0895	24.9979	25.8266	25.8308	25.8852	24.9737	26.1742	25.3519	26.4708	25.0928	24.8597	25.5178	24.3797	25.0737	25.4119	25.0053	25.0555	26.1471	24.2425	25.4928	25.0669	24.8187	25.3437	25.6153	26.0786				8	8	8	21.4	21.4	21.4	65.335	0	168.72	2034800000	125
26.08	26.24	27.4781	27.0526	26.9381	27.5196	27.9154	27.089	27.2182	27.0559	27.9488	27.2754	27.4274	28.3077	27.536	27.5005	27.8206	26.9996	26.6917	27.6203	28.0052	26.7953	26.6722	26.7599	27.1437	26.4814	28.8563	27.5746	26.2088	28.0085	27.8595	26.1769	28.2072	27.1814	27.4754	26.5868				18	18	18	46.3	46.3	46.3	68.569	0	323.31	7442800000	386
25.5891	26.0243	26.6721	25.7897	27.521	27.2285	27.2148	26.4658	27.363	26.5165	27.6218	26.8411	27.0083	27.3546	26.972	27.7505	27.5972	26.2913	25.072	27.479	27.6081	25.0849	26.0827	25.2217	26.9825	26.225	28.377	27.1694	26.0461	27.4609	27.2074	26.1138	27.6654	26.4622	27.9727	26.9601				20	20	20	61.5	61.5	61.5	69.283	0	323.31	5756600000	324
29.3769	29.2619	28.7632	28.6191	28.7341	29.0977	28.849	29.593	29.163	29.2077	29.0729	29.1635	29.8536	29.8218	29.4637	28.6229	28.8309	29.1448	28.8978	29.1836	28.6891	29.1678	28.8986	28.8967	28.993	29.2379	28.6288	29.0209	29.2532	28.7903	28.7883	29.1356	29.0406	29.3748	29.123	28.4186				12	12	8	47.9	47.9	33.5	40.45	0	323.31	24626000000	852
34.1074	34.7632	34.4597	33.7787	33.9683	33.5135	33.3406	33.8801	33.1476	34.1398	34.0581	33.3905	33.962	33.0098	34.5239	34.9335	34.0464	33.362	34.0222	34.7296	33.6831	34.672	33.2756	34.7434	34.165	32.9556	33.4337	34.8067	33.6577	34.2897	34.2131	34.3122	33.4057	34.0163	33.0513	32.2402				11	11	3	61.5	61.5	23.1	14.105	0	323.31	814340000000	2768
27.4648	26.9298	26.7184	27.2223	27.3688	27.1833	27.0877	27.4836	26.544	27.2028	26.9611	27.3869	26.5829	26.9342	26.9937	26.4362	26.4667	26.943	27.3714	27.501	26.8434	27.0966	27.1577	26.3731	27.134	27.6599	27.2463	26.697	27.181	26.8566	26.8437	27.2801	26.9104	27.2716	26.4777	26.3354				17	17	16	24.8	24.8	24.1	109.55	0	323.31	5550100000	345
28.1869	27.6727	27.8834	27.6538	27.6629	27.8858	27.6687	27.8618	27.729	27.5601	27.4136	27.8469	27.5655	27.7615	27.3153	27.2025	26.2616	27.7445	27.9413	28.3132	26.9602	27.7462	27.9739	27.2352	27.6747	28.2491	27.1342	27.4682	28.1397	27.3334	28.037	27.9381	27.3318	28.0975	27.9204	27.9381				16	16	16	32.4	32.4	32.4	84.781	0	323.31	9022200000	461
31.1385	29.6612	29.2113	30.4346	29.1119	30.9635	31.9109	31.2019	33.3842	30.1101	32.1509	31.4531	31.1826	31.5994	30.1147	29.6516	31.1923	31.0763	28.1301	29.1433	29.9928	29.475	29.4602	30.2644	30.7223	26.7542	31.0384	29.1958	31.3817	27.7707	30.0097	30.0172	30.9387	30.1306	31.1174	33.9793				7	7	7	69.9	69.9	69.9	10.834	0	323.31	82108000000	706
23.3188	23.8787	24.8736	24.7516	24.7439	23.5538	25.1426	25.7017	23.1784	24.8399	24.5707	24.1972	23.8029	24.6814	25.7411	24.1174	23.4358	24.7988	24.4164	25.3919	24.3869	24.0501	24.5495	24.8605	23.9198	21.5152	25.1138	24.8924	23.2623	25.4929	25.4798	23.2564	24.6573	25.1949	24.8565	22.9955				8	5	5	25.8	15.8	15.8	32.852	0	194.18	1093600000	164
26.5926	22.69	23.8865	26.7473	21.9203	26.5349	25.909	26.2972	28.2171	25.2353	26.104	25.9572	26.2532	27.5245	24.7949	26.6455	26.7633	25.747	24.8065	25.4097	25.9435	22.8923	25.9563	23.9389	25.6908	23.0903	25.7586	24.2164	25.1696	25.7082	26.3316	22.2129	26.8451	25.4559	27.3353	24.349				10	10	10	31.9	31.9	31.9	49.757	0	65.454	2611100000	142
24.4305	23.8542	23.2507	23.1059	23.5999	25.4372	23.4694	23.6517	23.6854	23.265	23.0781	23.2217	24.1619	22.9954	24.5098	24.5725	24.3977	24.4615	23.6174	23.4375	23.1159	22.5876	24.3397	24.7189	22.7236	23.7065	23.097	23.7528	23.8833	22.9725	23.5327	23.1094	23.8118	24.246	25.3204	22.6198				4	4	4	30.9	30.9	30.9	17.887	0	88.348	649560000	53
28.6749	29.7746	28.9957	31.1074	29.2664	30.4629	30.9052	27.9524	33.3788	29.2944	31.1679	32.0178	28.5995	29.1391	28.7698	29.5414	30.9227	29.8909	29.6045	26.6796	30.2841	29.9937	29.0582	27.2475	30.9401	26.7031	30.2849	28.9142	28.3234	27.6189	30.1673	30.1408	30.9172	30.4111	29.3159	34.7725				33	33	30	60	60	54	73.853	0	323.31	70365000000	1182
25.9428	23.2362	25.5502	25.7797	25.9077	25.43	25.5051	25.8979	24.8985	24.2621	24.4519	24.4534	24.6482	24.914	25.6427	24.1662	24.7831	25.8617	25.2139	25.5347	22.7509	25.6803	25.4974	25.9045	24.6639	24.9173	24.2866	24.971	25.5416	23.4702	24.5628	24.9867	23.7743	24.9849	26.1324	25.636				9	9	9	44.1	44.1	44.1	36.112	0	167.09	1520500000	123
27.6183	25.9295	25.673	26.4495	26.2604	27.7189	27.1128	26.7042	26.8294	25.8387	27.1291	26.1356	25.6048	26.2174	25.4865	25.6977	25.4112	26.7473	26.0147	26.832	26.1737	26.1894	26.2185	26.3627	25.5912	25.5642	25.65	25.4474	27.0207	25.032	26.1525	25.8896	25.5828	26.1404	28.6699	27.1437				9	9	9	24.2	24.2	24.2	57.825	0	244.49	3481600000	303
30.9449	29.3209	29.3399	30.0927	30.5389	29.4063	29.9693	28.4717	30.4229	30.044	30.2195	29.3941	29.3252	28.7333	29.2433	30.7337	29.0072	30.1622	30.3337	29.2056	30.4438	30.0851	30.1988	30.322	30.1635	30.6568	28.321	30.1368	31.1937	28.6508	28.5218	29.9751	29.7824	30.4782	29.6188	30.257				5	4	4	94.7	79.8	79.8	11.514	0	323.31	40946000000	351
30.9786	29.4773	28.6127	29.4452	29.8074	29.317	29.2916	29.1565	29.3284	29.3508	28.956	29.4978	28.7657	28.7037	28.8513	29.6127	28.7624	29.9242	29.1526	28.5539	29.4873	28.6372	28.9334	29.6992	28.7177	29.9285	28.2338	29.3024	30.3032	27.9638	28.4017	29.443	28.8346	29.4765	29.6852	30.0503				7	7	6	85.2	85.2	70.4	11.665	0	323.31	28731000000	615
28.7581	27.9769	28.1831	28.4882	28.5904	28.3842	28.3861	28.297	28.8935	28.4102	28.2096	27.8891	28.7225	28.4041	28.651	27.8363	27.9329	28.6151	28.5616	28.3118	28.6177	28.8348	28.6544	28.6979	28.3869	28.438	28.0445	28.713	28.4847	27.757	28.067	28.7982	27.9623	28.437	28.6118	28.6923				9	9	3	44.2	44.2	18	34.273	0	323.31	15042000000	607
25.0592	25.5822	24.689	25.0022	24.839	25.6654	24.7406	25.1404	24.1777	25.0113	24.7639	25.1852	24.7148	25.2758	25.3548	25.5261	25.8245	24.3437	24.5561	25.5148	25.6522	24.8986	24.7113	24.0212	25.0279	25.4015	25.0749	25.1578	24.8625	24.8463	24.8999	25.0661	24.765	24.3352	25.7376	25.3371				7	7	7	19.9	19.9	19.9	46.836	0	323.31	2015700000	319
24.6405	23.5956	23.6847	24.6183	24.2799	25.6969	24.8588	24.5019	25.562	24.3819	23.8963	24.4713	24.7627	26.2777	25.7273	23.9005	25.2866	24.2775	23.2557	24.3232	24.7545	24.497	23.9483	23.8802	23.8976	23.296	25.6658	24.87	24.2425	25.1678	24.6745	23.7504	24.7675	24.5741	24.1948	23.1125				6	6	6	12.2	12.2	12.2	87.445	0	11.016	1092300000	87
23.1591	25.2276	25.3558	23.4876	24.7335	21.7296	21.6581	24.7525	22.1876	24.1075	24.0365	23.6937	24.1391	20.5426	24.4554	22.4211	22.1671	23.6811	24.9585	24.5403	23.3035	24.5613	24.7469	23.433	24.4534	25.849	23.7833	24.1833	24.0187	24.3143	24.0177	25.0089	23.1561	24.1092	24.1594	23.958				13	13	9	30.5	30.5	20.8	77.011	0	129.22	784320000	147
24.7564	23.4873	24.0755	24.4651	25.1505	24.7054	24.0579	24.2207	24.5457	24.2232	24.5797	24.4088	24.5806	23.81	24.349	24.3035	24.7644	24.0936	24.3536	24.9203	25.3329	24.4839	24.6648	23.0646	24.4319	24.4767	23.5677	24.5216	25.0607	24.3209	24.0996	24.7376	23.8923	24.3683	24.6891	24.5063				8	8	8	41.7	41.7	41.7	40.786	0	183.15	1104000000	167
30.3591	28.2926	28.8088	28.8855	29.4882	29.7657	27.9026	29.5739	30.1128	29.2236	29.8065	29.7674	29.4162	29.6659	29.273	29.1509	28.8868	29.4234	28.9897	30.0103	29.5239	29.2516	29.5655	29.6595	29.5607	28.4467	29.3851	29.0187	28.9961	29.6187	29.4053	29.1298	29.7525	29.6082	30.2918	30.0588				21	21	13	54.2	54.2	35.2	80.64	0	323.31	31100000000	869
30.6164	29.7897	28.182	29.1761	30.4843	28.9599	30.089	29.0949	29.3002	29.6291	29.4956	29.3757	25.3116	29.3182	28.0284	29.5214	27.3523	30.8891	29.7035	28.6672	27.81	30.113	30.23	29.4634	29.8873	31.0923	28.4214	29.6124	29.9943	28.8216	28.5011	29.5801	28.4626	30.6451	28.2407	30.5779				3	3	3	29.1	29.1	29.1	12.074	0	323.31	36849000000	525
30.2424	29.3875	31.1287	29.984	30.2201	31.2233	30.7754	30.7971	30.4224	30.3192	30.9434	30.3726	31.1644	30.9915	31.2344	30.3247	30.748	30.3595	29.6385	31.2745	30.5787	30.7987	30.0295	30.1519	29.8512	29.8583	31.1142	30.9881	29.7537	31.4062	31.1321	29.8313	30.781	30.4417	30.4772	30.0755				26	26	26	73.9	73.9	73.9	56.559	0	323.31	76011000000	1998
29.5898	28.2416	27.5691	29.64	28.6858	29.7568	31.0741	29.4194	31.762	28.8736	30.9853	30.8995	29.0057	29.5017	28.0321	29.4165	30.2294	29.9973	26.9116	28.5559	29.7971	28.0505	28.8445	28.469	29.7462	25.0941	29.7886	27.6656	30.01	26.0859	28.6763	28.6773	29.9822	29.0747	28.9726	32.373				5	5	5	43.9	43.9	43.9	13.242	0	323.31	41205000000	1038
28.8332	25.6617	27.0362	26.3488	26.6772	27.2882	24.7835	27.5641	29.097	27.2889	28.1123	26.4835	27.0088	27.9376	27.211	27.3763	26.7327	26.0932	25.448	25.8986	28.447	27.1036	27.5446	27.2142	26.0521	26.9601	26.7273	27.1903	28.4529	26.2316	26.1309	26.2444	27.0399	28.2541	28.6489	28.2661				6	6	6	71.1	71.1	71.1	10.18	0	145.92	6341700000	117
32.0286	31.4956	31.3951	32.1867	31.8639	31.792	31.5177	31.78	31.5234	32.0322	31.4909	32.3147	31.7954	31.2055	30.9984	30.8788	30.7935	31.7848	31.6832	31.6792	31.5139	31.5744	31.9451	31.3947	31.8225	31.7612	31.6356	31.5602	31.754	31.2336	31.4578	32.3115	31.2541	31.8715	31.8596	32.056				20	20	17	60.1	60.1	47.5	47.168	0	323.31	172020000000	5554
22.655	24.8097	22.3779	25.9702	23.6806	25.0608	26.1127	24.4291	26.2211	23.8843	24.6465	25.5241	26.5232	26.4455	22.8568	27.1249	25.706	21.8835	21.7486	23.899	24.9932	22.2886	21.7295	23.1809	24.581	21.5775	25.4761	22.2251	22.0309	24.7412	23.4324	23.7308	25.9915	22.8264	25.3117	26.5045				15	12	11	28.7	22.9	21.5	93.133	0	234.75	1539100000	128
27.8292	27.8019	27.4362	27.5558	27.7686	27.9128	27.6852	27.7978	28.2206	28.1613	27.8079	28.2391	27.7069	27.6285	27.5195	28.2433	28.0097	27.0251	27.2914	28.0668	27.0147	28.0533	28.3958	27.7655	27.5278	28.0783	28.0761	27.7475	27.9251	27.8042	28.0054	27.8004	27.4753	27.908	28.135	28.6408				12	12	8	32.8	32.8	22.4	63.146	0	323.31	10968000000	517
26.8297	27.1513	28.4168	26.8998	27.1688	28.0965	26.6319	26.6098	26.6115	27.0505	26.9849	27.0967	26.7876	26.2058	27.668	27.055	26.9629	26.52	26.9356	27.5968	26.8715	27.7021	27.1815	27.4658	26.5095	26.6675	27.7793	27.6747	26.7768	27.7233	27.5997	27.0534	27.0318	26.737	28.5801	27.1032				5	5	5	29.6	29.6	29.6	32.575	0	323.31	9196800000	442
31.1368	30.7129	30.8062	30.9126	31.4554	30.735	30.3311	30.8993	30.6588	30.527	30.2956	30.9593	30.6767	31.0849	30.6568	30.5008	30.1781	31.1148	31.192	30.6113	30.1009	31.3137	30.6985	31.089	31.0006	31.7085	30.3013	30.7774	31.0514	30.4353	30.5996	31.2437	30.1802	30.6966	30.2023	30.6209				12	12	8	35.1	35.1	25.8	28.87	0	323.31	75442000000	768
27.8644	26.9526	26.8661	27.3664	26.3264	26.9901	26.3671	23.6248	25.7018	26.6776	25.8764	25.7994	26.372	24.9833	25.6417	24.8394	25.7125	22.5919	27.2994	24.865	26.573	27.0593	27.3438	27.4521	25.2811	26.0017	25.9266	26.9863	27.7304	24.8746	25.2912	26.8638	25.4587	26.1304	28.4959	26.9131				4	4	4	67.8	67.8	67.8	10.044	0	19.39	4394300000	60
29.7584	29.1705	28.3567	29.3847	29.2455	28.8415	29.0399	29.4933	28.2531	29.6143	28.6839	29.636	29.0066	28.0471	29.5949	28.5247	28.3026	29.195	29.0883	29.1157	28.9663	29.5942	29.6687	29.2524	29.2835	29.7359	28.8298	29.4517	29.1439	29.1618	28.8205	29.7238	29.2224	29.6151	29.1384	29.3475				12	12	12	48.5	48.5	48.5	36.638	0	323.31	26925000000	648
29.7069	27.9079	27.4289	28.4405	27.1454	28.5753	29.2808	29.2371	28.4558	27.7538	27.9613	27.9683	28.4877	28.2724	27.5549	28.2004	26.7943	29.1198	28.3316	27.9667	27.4308	28.1591	28.5026	28.2853	27.614	28.1036	27.4241	27.8754	29.1908	27.454	27.2317	28.106	27.4684	27.9546	28.1358	28.0685				12	12	12	76.8	76.8	76.8	22.088	0	323.31	14373000000	413
28.058	26.502	27.1065	28.18	27.6089	28.9213	28.7488	28.827	29.4958	28.0439	28.9839	28.575	28.697	30.3602	28.2489	28.1604	29.0666	27.8831	26.8932	28.3069	28.7343	27.6982	27.929	27.3134	28.1343	27.0805	30.2388	27.9661	28.106	28.565	28.6611	27.6136	29.1957	27.967	28.9306	28.8868				14	14	14	35.2	35.2	35.2	57.116	0	323.31	17599000000	413
30.1074	28.2026	27.5622	29.1708	27.4667	29.6342	29.4909	29.8218	28.9627	28.2074	28.0402	28.2333	28.8545	28.2099	27.0815	27.8955	27.3137	29.2379	27.9851	28.6345	28.0256	27.7136	30.0329	28.6008	27.7442	27.9828	27.4786	28.196	30.3077	27.7357	27.1468	28.8131	27.4696	27.6439	28.4002	27.7916				15	15	15	55.3	55.3	55.3	44.552	0	323.31	22161000000	1033
29.518	28.5211	29.1581	29.4906	29.0712	29.3631	29.4274	29.5481	29.5223	29.422	29.9081	29.2349	29.0399	30.1489	29.691	29.6432	29.9723	28.7736	28.9286	29.726	29.4252	28.2694	29.1216	28.2446	29.1059	28.8332	30.2682	29.1001	29.2791	30.1702	30.0041	28.9787	30.0559	29.0797	29.5761	28.875				17	17	17	56.9	56.9	56.9	38.604	0	323.31	33517000000	880
27.4591	27.507	27.9688	27.3599	27.4727	27.5587	27.4017	28.0216	27.3444	27.6511	27.4044	27.7014	27.7829	27.1278	27.7178	27.4092	27.4709	27.8141	27.7981	27.8007	27.4241	27.9834	27.8131	27.7599	27.773	28.2878	27.3913	27.9164	27.8227	27.4257	27.5295	28.01	27.4367	27.7871	27.4876	27.9353				28	28	28	54.9	54.9	54.9	81.889	0	323.31	9289100000	745
31.8684	32.0746	32.4496	32.0406	32.111	31.9283	31.908	31.607	31.8546	32.2389	31.7826	32.0612	31.7871	31.7613	31.9714	31.6308	31.5254	31.9468	31.9899	32.2573	32.2102	32.0976	31.7547	32.1199	32.1452	32.2446	32.2326	31.9453	32.0033	32.0659	31.9678	32.22	31.9107	31.8658	32.5497	32.1224				19	19	4	64	64	13.5	49.67	0	323.31	246650000000	3865
31.7666	28.358	28.6341	30.5506	29.7055	30.4711	29.9272	30.8346	30.323	29.0224	29.5332	29.6177	28.9018	28.8808	28.738	29.0799	27.9686	30.0028	28.9985	29.4638	29.7802	28.838	30.7045	30.3446	28.4235	28.0981	27.9844	28.816	31.9256	28.1044	27.8537	29.393	28.2155	29.5029	28.9549	29.1368				9	9	9	24	24	24	58.112	0	323.31	34919000000	293
33.0866	32.4263	32.2441	32.5151	32.4171	31.9813	32.1095	32.8242	31.7241	32.243	31.7363	32.1454	32.2148	31.3875	32.3352	31.4171	31.181	32.6295	32.5451	31.9843	31.7172	32.777	32.3413	32.7103	32.2234	32.0202	31.3373	32.4396	32.7822	31.3186	31.5557	32.4068	31.5355	32.3584	31.8442	31.1574				13	13	9	87.9	87.9	70	15.054	0	323.31	258270000000	4203
30.2956	30.182	29.5876	29.9614	30.4695	29.2655	29.8052	29.9791	28.9832	29.673	29.5212	29.7905	29.4134	28.4586	29.1587	29.5096	29.3354	30.2878	30.5727	29.021	29.5824	30.4291	29.9506	30.4176	29.8564	30.7966	28.3586	29.8987	30.2175	29.0458	28.662	30.3001	29.1721	29.8995	29.2485	29.483				11	11	11	78.3	78.3	78.3	19.608	0	323.31	41225000000	743
24.5724	23.54	25.0442	24.3761	23.7554	23.9163	23.9307	24.7986	23.6964	24.9302	24.4514	24.6779	25.005	23.6182	25.3738	23.3016	24.6087	24.2333	24.5654	25.2529	25.1191	24.3025	24.4221	23.9869	24.0346	24.9671	25.6767	24.2264	23.4784	23.8006	24.7361	24.6959	24.941	24.6014	25.0004	24.444				17	17	17	18.5	18.5	18.5	170.59	0	47.173	1015300000	155
31.3601	28.2742	26.5169	30.3306	30.0723	27.2468	30.2674	30.328	29.9279	28.3763	29.6345	28.0869	29.0185	30.2731	27.6103	29.0203	29.052	29.3403	26.8376	28.9216	28.9672	29.1881	29.4031	29.3232	28.9511	26.4908	28.2996	28.2653	30.768	27.9092	27.8772	29.0133	28.5109	28.3702	29.9519	29.334				8	8	8	31.3	31.3	31.3	37.821	0	323.31	25446000000	282
29.5461	28.9718	28.4355	29.1152	29.1701	28.8485	29.2892	29.6597	28.7399	29.4141	28.975	29.3716	29.7072	29.3749	29.5464	28.3295	28.1955	29.3731	28.9562	29.1274	28.4621	29.0271	29.5605	28.588	29.0762	29.1035	29.1007	29.2141	29.417	29.146	29.5152	29.4569	28.9703	29.3137	29.1441	29.9788				26	19	19	48.4	32.9	32.9	84.659	0	323.31	27094000000	845
26.5714	26.3998	25.7854	25.4241	25.4667	25.3724	25.6368	26.3377	25.2078	24.8987	25.3964	24.748	24.899	23.6702	23.9151	26.0705	26.9012	25.7152	25.7155	25.0053	25.881	25.8327	25.2304	25.4908	21.7587	24.9511	23.9834	25.0143	22.7492	24.6489	24.2584	25.3296	24.7524	25.0044	25.0299	24.2064				2	2	2	48.4	48.4	48.4	10.739	0	204.76	2252000000	79
22.887	23.6199	24.836	22.376	24.0349	24.6134	24.542	25.4828	23.5899	24.3505	22.2097	23.1012	26.3834	23.9557	25.3693	22.96	23.2175	24.3495	24.7721	25.2675	24.1231	23.542	23.2918	23.4718	22.7523	24.2895	23.8216	24.4514	24.2077	23.8673	23.8091	24.6523	23.7255	22.4125	23.414	22.8229				13	13	11	39.1	39.1	36	56.033	0	193.98	784030000	136
24.2918	23.4761	25.0207	24.4154	23.8241	25.4023	25.2008	24.4238	24.057	24.8538	25.1976	24.7318	24.8634	25.3774	25.3463	24.4748	24.4149	24.265	24.5407	25.3997	25.2307	24.7459	24.9671	24.3653	24.6688	24.5445	25.7878	25.0297	24.3242	25.0284	25.6064	24.3468	25.0487	24.8175	25.8579	24.2561				8	8	8	31.9	31.9	31.9	50.212	0	323.31	1261300000	130
30.3737	30.621	30.8714	30.3485	30.929	29.6236	29.5133	30.2377	29.4214	30.5705	29.7822	30.3343	29.8075	29.5572	30.825	30.443	30.1266	30.1877	30.8929	29.9354	30.0914	30.7873	30.3914	30.1971	30.4531	31.4831	30.2273	30.727	30.4978	30.1877	30.6479	30.9232	30.1601	30.3613	29.6392	30.122				30	30	30	53.3	53.3	53.3	75.872	0	323.31	61706000000	1403
25.5386	26.5445	25.1687	26.0374	26.2825	26.0336	25.8658	25.4381	26.2866	25.6473	25.6933	25.6702	25.9486	26.0885	24.6082	26.107	25.9675	26.0126	25.3107	25.5443	25.2964	25.7285	25.665	25.3303	25.5128	26.0945	25.38	24.7675	26.0583	25.131	25.1086	25.4421	25.2967	25.7755	25.6306	27.2339				12	12	12	34.3	34.3	34.3	61.815	0	107.18	2241900000	192
31.3394	30.1283	30.3607	31.3303	31.426	30.9613	31.3575	31.3768	30.4503	31.2097	31.0675	31.4168	31.5293	30.8958	31.1781	30.1957	29.726	31.4074	31.1652	30.9589	30.9058	30.8799	31.8546	30.8919	31.2465	31.386	31.2451	31.0048	31.2792	30.9277	31.1177	31.6577	31.0418	31.4201	31.2374	32.2668				26	24	16	49.2	47.2	30.2	83.263	0	323.31	102050000000	1693
26.3965	25.8738	25.6678	27.32	26.3932	26.9318	26.8957	25.8833	27.1481	26.2282	26.5589	25.6375	25.3706	25.8292	25.2606	28.3609	26.7517	27.9829	26.715	24.3065	27.8558	26.644	25.9269	24.9814	25.6623	26.001	24.9393	25.9352	25.9139	26.9726	26.6041	24.5695	26.2277	26.6846	24.0392	22.653				4	4	4	21.2	21.2	21.2	25.851	0	157.43	4303600000	121
25.6801	28.7872	30.2495	29.4606	28.9959	28.8109	27.9079	24.1135	30.3088	27.251	29.1667	29.6952	26.1798	28.9516	26.8867	27.2581	29.1853	27.8618	28.4807	21.6683	28.3631	28.5256	25.6354	26.0056	29.4662	25.2356	27.8385	30.0012	25.4707	27.3566	28.0991	28.1204	28.7653	28.8508	26.1615	32.1041				7	7	7	35.3	35.3	35.3	28.837	0	323.31	21023000000	479
26.8441	26.1586	26.6012	25.4289	24.4113	26.1368	26.5604	26.6843	26.1665	25.9729	26.531	24.5282	26.7793	25.7114	26.3412	26.6267	24.5986	25.9245	25.8147	27.4503	25.5996	25.8376	25.8275	26.5119	26.038	26.0615	25.6593	25.9858	26.7086	26.229	24.7644	25.5528	25.7305	26.0683	27.0538	26.2303				7	7	7	35.7	35.7	35.7	40.124	0	168.15	3046000000	187
27.4615	26.3257	26.3625	27.2398	26.8131	28.9273	27.7041	28.3805	28.4878	25.9966	27.2865	26.3322	28.7637	27.7243	24.8456	27.5009	27.8875	28.7012	25.9005	26.9562	27.5242	26.3256	26.702	26.5842	26.1823	26.0287	26.3571	26.1841	28.4502	26.1773	25.9531	26.4948	26.6323	26.2214	27.7135	27.478				9	9	9	29.9	29.9	29.9	40.076	0	323.31	7442300000	234
29.1105	28.7164	29.0407	28.4898	28.7203	27.4189	27.5983	29.1698	27.4741	29.0285	27.8495	28.7254	28.3541	27.6055	28.81	27.8171	27.2102	28.8347	29.1443	29.0144	27.8031	28.7464	28.9573	28.4215	28.8078	29.4334	28.0422	28.7565	28.9745	28.6218	28.9074	29.259	28.1798	29.0719	27.5813	27.8555				26	26	26	32.2	32.2	32.2	131.13	0	323.31	16830000000	860
25.4639	24.8185	26.1414	24.6749	25.9709	25.0626	25.0334	25.2895	25.0778	25.5617	25.2378	25.763	24.8218	24.9088	25.8906	24.5098	24.4412	24.8182	25.2896	25.3032	24.9893	25.9977	25.6203	26.138	25.2656	25.6005	25.2457	25.9317	25.5029	25.5114	24.8557	25.8861	25.2505	26.1139	23.777	24.9612				3	3	3	14.5	14.5	14.5	50.617	0.0002613	4.0867	1746100000	61
31.6424	32.2779	33.4136	33.0167	32.2653	33.7012	33.1426	32.4014	32.8484	32.6365	32.9508	32.7026	32.4861	33.6798	33.534	33.4067	33.561	32.4975	32.4782	33.5026	33.1302	32.0495	32.1777	32.717	32.8648	31.6327	33.1481	33.3711	32.072	33.4394	33.4724	32.2424	32.886	32.3669	33.2209	32.3227				35	35	33	69.5	69.5	65.7	53.651	0	323.31	413640000000	4675
27.2628	27.4543	27.1593	27.4108	27.241	27.1025	26.9922	27.1328	26.9218	27.2188	26.7551	26.754	27.0081	26.2384	26.1444	27.3531	27.8855	27.101	27.3212	26.8407	26.8024	27.1976	27.1601	27.8933	26.938	27.2151	26.9706	27.3083	26.8559	26.7972	26.3284	27.2783	26.9336	26.4898	27.7241	27.487				4	4	4	41.5	41.5	41.5	15.55	0	303.46	6874300000	282
25.5264	24.8216	25.5742	25.139	25.0964	25.3761	24.6783	25.8957	25.2535	25.2529	25.093	25.2279	25.5695	25.5804	25.7391	24.3066	24.871	25.4767	25.8077	25.726	25.0225	26.0252	24.9898	25.6661	25.5055	26.1726	25.1506	25.4979	25.2449	25.0947	25.3819	25.8102	24.888	25.3354	25.7792	22.1959				8	5	5	39.8	29.1	29.1	40.532	0	212.9	1690400000	112
31.191	30.5354	29.8128	30.377	30.3857	31.3265	30.7469	31.4293	31.0399	30.2823	30.5626	30.2266	31.0254	30.9732	29.919	30.4526	31.3087	31.2514	30.4196	30.0765	30.1699	30.6831	30.8784	30.6537	30.4291	30.7003	30.4147	30.5258	31.4665	29.7856	30.5318	30.6688	30.327	30.5044	31.2332	30.8646				22	22	22	67.5	67.5	67.5	35.936	0	323.31	83400000000	1330
30.3926	30.3068	30.2857	30.9096	30.3817	29.8475	30.1877	30.1831	30.1097	29.8949	29.7714	29.9389	30.5082	29.8522	30.0624	29.6486	30.0812	30.5648	30.7211	29.9679	30.0885	30.5372	30.3145	30.7982	29.9524	30.3058	29.5775	30.4282	30.3356	29.5437	29.6827	30.5044	29.81	30.1819	30.291	30.4718				14	14	14	58.3	58.3	58.3	32.854	0	323.31	56295000000	994
25.3021	23.9602	26.1114	25.1696	24.7903	24.693	23.8391	24.2845	22.9137	24.7608	24.512	24.5286	24.4531	24.2419	24.7743	23.3092	23.8841	23.8809	24.5052	24.9543	24.8153	25.0709	24.4205	25.6478	24.9009	24.9972	24.4357	24.8753	25.4191	24.2455	24.357	25.0953	24.5939	24.6644	26.1781	25.4648				6	6	5	31.2	31.2	28.4	31.279	0	38.059	1156200000	94
23.7447	24.4608	25.3945	24.0571	23.7796	25.0802	24.8668	25.4404	24.0993	24.0345	24.5522	23.9052	25.38	24.9293	24.1831	25.1725	24.822	24.5469	23.3901	25.8715	24.5415	23.8418	23.5002	24.976	23.3709	23.3072	24.6465	24.4345	23.3188	24.641	23.2912	23.5322	24.506	24.248	24.2497	22.9711				11	11	11	42.5	42.5	42.5	44.292	0	323.31	1008000000	135
28.8759	28.5492	28.0281	28.6553	28.0317	28.5831	28.5039	28.3711	28.0802	28.3964	28.263	28.3577	28.2092	28.1581	28.4781	28.0317	28.7266	28.5176	28.515	28.2985	28.8769	28.1056	28.7174	28.4153	28.2315	27.9686	28.6169	28.3707	28.4971	28.0757	28.2549	28.4365	28.4319	28.0647	29.1315	27.871				9	9	9	52.9	52.9	52.9	23.356	0	323.31	20334000000	876
30.7826	28.8892	28.6463	30.6527	29.8592	30.391	29.7377	28.0929	31.6108	29.2362	30.4652	29.2242	29.211	30.5179	28.1658	29.4112	30.3994	29.869	28.7426	28.0681	30.2272	29.4345	29.8333	28.6283	28.8397	27.8846	29.2475	29.0222	30.1301	28.3103	28.5692	28.5898	29.3268	29.3018	30.8786	30.3321				8	8	8	69.6	69.6	69.6	14.716	0	323.31	38861000000	1067
29.3633	26.8014	24.7268	27.7679	28.4339	28.8229	25.8971	27.718	28.3096	26.7255	27.5735	27.3846	26.4701	27.7037	25.1009	27.3415	27.1718	27.4199	26.577	28.0017	27.8461	26.5741	28.2939	28.1124	26.8663	26.2389	26.3498	26.9964	28.4249	26.209	25.9981	27.3838	26.6767	26.8788	29.7206	26.3452				11	11	11	49.1	49.1	49.1	36.842	0	323.31	7593000000	282
26.3656	25.7402	24.2402	26.3221	26.233	25.3652	26.9969	26.1681	26.3719	25.7315	25.9897	25.73	25.919	23.084	24.9635	25.4872	25.0568	22.0758	26.2229	25.4444	26.4884	25.4216	25.8253	26.2661	25.693	25.3363	25.5922	24.7244	26.1886	25.3037	25.3518	25.824	25.632	25.5866	25.851	25.8263				2	2	2	17.5	17.5	17.5	17.687	0	201.33	2194200000	89
27.5653	27.1067	26.7189	27.0035	27.1202	27.2712	27.5436	27.1383	27.521	26.7613	27.3405	27.0875	26.8782	27.5909	27.0044	28.0949	26.8992	27.1174	26.7488	26.3141	27.2232	27.0633	26.7691	26.6352	26.6871	26.8151	27.2479	27.0866	26.6862	27.0129	26.975	27.0401	26.9885	26.9896	27.431	27.2851				13	13	4	48.6	48.6	20.4	35.882	0	323.31	6077600000	427
26.1333	24.0279	24.1415	25.5727	25.2656	25.2185	25.9812	26.3636	23.9679	24.1173	24.6362	23.9179	27.3988	24.6325	23.5843	24.1143	24.6425	25.7051	24.0429	25.1266	24.939	23.5387	24.4372	25.0968	24.0261	23.6237	25.0476	24.1824	24.8048	24.3643	22.5954	24.203	24.4731	21.9893	25.6243	25.8011				8	8	8	41.7	41.7	41.7	32.818	0	46.39	1528400000	159
23.5752	23.0546	24.6867	22.7394	22.3392	24.3115	24.4007	23.8943	22.9816	23.8513	24.1231	24.2733	23.5209	22.1305	24.3427	25.4124	24.4858	23.6079	22.8215	25.3684	23.7618	23.8201	22.7986	22.8541	23.489	22.9112	24.6702	24.2971	22.2379	24.4953	25.2379	22.1678	23.9508	23.1391	24.8779	22.907				6	6	6	27.7	27.7	27.7	54.177	0	213.61	852070000	129
28.7126	28.8128	29.3791	29.0851	28.2586	28.8475	28.6293	28.5206	27.9586	28.9474	28.1714	28.4952	28.2573	28.3989	29.1886	28.1536	27.579	28.0581	28.9403	28.7606	28.6056	28.3403	28.8143	29.0905	28.3289	28.5574	29.0546	29.3565	28.7765	28.5702	28.7462	28.6228	28.1337	28.5024	29.216	28.4638				10	10	10	37.5	37.5	37.5	29.386	0	323.31	23460000000	845
27.0803	27.115	27.5045	27.2067	26.7988	26.9451	26.6006	26.6055	26.0724	26.6644	26.2488	26.5168	26.7579	26.1131	27.2617	26.388	26.2834	26.8503	26.9243	26.9048	26.2841	27.0268	27.0626	27.0948	26.5623	26.2784	26.3352	27.103	27.133	26.4897	26.7966	27.2028	26.1849	26.7248	26.7562	26.6252				8	8	8	47.1	47.1	47.1	28.415	0	323.31	4449900000	226
24.1612	24.1334	26.968	25.2572	26.1213	25.0168	25.0119	25.3937	23.1964	26.773	25.7511	27.1149	25.9428	25.5826	28.094	25.5713	26.2303	25.4483	25.5295	27.218	26.8367	26.3473	26.5247	24.8295	26.4807	26.0831	26.6144	26.9071	25.5302	27.273	27.608	26.3744	26.2575	26.6574	26.0219	24.425				16	16	16	24.8	24.8	24.8	113.08	0	323.31	3626900000	263
28.2239	27.7121	27.6138	27.4853	27.5138	28.1346	28.2944	29.0267	27.8202	28.3214	27.7005	28.2312	28.7797	27.1146	28.2131	27.4265	27.3603	28.606	28.1695	28.2874	27.5207	28.5067	28.4369	27.7336	28.0282	28.7988	27.5481	28.4492	29.2447	27.7595	27.8324	28.7359	27.4993	28.026	27.3532	28.4649				18	18	18	44.2	44.2	44.2	69.284	0	323.31	12836000000	643
28.2622	28.5682	28.2531	28.0987	28.5665	27.4865	27.1715	28.0395	27.0858	28.3796	27.5324	28.6463	27.7574	26.9484	27.8221	27.0685	26.8278	28.2719	28.3106	27.5151	27.635	28.5773	28.3563	27.9675	27.8424	28.6955	27.1155	28.3233	28.4797	27.9248	27.9422	28.7215	27.5004	28.3994	27.5478	28.0757				13	11	11	54.1	46.4	46.4	39.455	0	323.31	17685000000	634
25.2672	28.3746	27.568	27.4171	26.6706	27.9118	27.6384	26.902	29.3376	28.1892	28.9832	28.1625	28.6357	28.6203	28.0789	29.116	29.5049	27.2184	26.6267	27.5541	28.384	26.9536	26.9015	26.3339	27.8809	26.1038	28.5715	27.58	26.1358	29.77	28.7988	25.59	30.2051	27.6596	29.4442	28.0653				42	42	2	42.9	42.9	2.3	192.78	0	323.31	15719000000	779
27.7854	27.1721	28.0526	27.5949	25.1218	27.1809	27.3251	27.4599	26.991	28.5617	27.4338	28.5351	27.543	27.8203	29.3551	27.5487	26.4496	27.4717	27.71	28.4211	27.7799	27.9812	28.4396	28.6903	27.0072	26.7793	28.5766	29.388	28.1202	29.2458	29.0323	28.4053	27.6789	28.4957	26.5564	26.3743				4	2	2	48.2	34.2	34.2	12.146	0	262.36	11347000000	109
24.9638	24.548	24.8019	25.5111	25.1598	25.4509	25.2372	23.5308	25.0798	23.6961	24.3813	23.552	24.7233	25.1167	24.6169	24.43	23.8362	24.511	23.7519	23.1008	25.4608	24.9499	24.2846	24.1413	24.5707	24.9597	23.4659	24.7885	25.4312	24.5912	23.7857	24.2546	23.8512	25.2191	25.0431	25.7056				6	6	3	35.6	35.6	20.7	34.196	0	65.677	1112000000	129
28.8543	27.7945	27.851	28.4535	28.3883	28.8882	29.6563	28.7909	29.1924	28.5696	29.2108	29.2149	29.8866	29.656	28.4838	27.9421	28.1839	28.7981	28.0387	28.7189	28.6232	28.3112	28.614	27.7376	28.3168	28.4325	28.7432	28.4355	28.6418	28.4381	30.0483	28.4793	28.751	28.622	29.132	30.4513				20	19	10	53.2	51.2	32	70.051	0	323.31	19991000000	771
26.3876	26.2221	26.8351	26.7412	24.9914	25.6024	25.9836	25.7564	25.4018	26.6768	25.8086	25.93	25.9776	25.5102	26.4947	25.3942	24.4725	25.6769	26.9729	25.9711	26.5037	24.4839	26.0287	26.8215	26.2465	25.781	25.8604	26.7575	26.0918	25.8389	25.8429	26.2886	25.9369	26.3257	26.211	24.8534				4	4	4	26.7	26.7	26.7	27.872	0	264.02	2752900000	77
30.2903	26.8666	27.1997	30.3471	28.9248	30.4781	31.4396	29.604	31.7605	30.6573	32.8418	31.1985	31.3467	32.1207	30.9092	32.4101	31.028	28.6771	28.2051	30.5816	31.2604	29.0578	28.9372	27.7497	30.4105	27.0909	32.172	30.0103	28.8943	31.8665	31.3044	28.0255	32.5621	29.679	30.8112	28.8006				14	14	8	41.2	41.2	27.4	49.328	0	323.31	88132000000	466
32.5306	31.4916	30.4513	32.2058	32.3794	31.2015	31.6709	31.7747	31.6776	31.1119	31.6471	31.3208	31.4794	31.1386	30.1604	30.8753	30.2601	31.9584	31.6947	30.1095	32.2618	30.9763	31.4786	31.3392	31.7659	31.7675	30.0213	31.2079	31.9019	30.9015	30.4034	32.1432	31.2969	31.7425	31.5674	32.0121				11	11	10	86.6	86.6	86.6	16.837	0	323.31	148150000000	1970
23.3821	24.5453	24.6336	24.7629	25.2725	23.9432	23.3907	24.643	24.1477	24.7939	23.9631	25.1563	24.6274	24.1576	24.2966	24.4925	26.2675	24.3454	24.801	23.8437	25.027	25.2571	24.4891	24.6307	24.7756	24.5249	24.9257	24.5337	24.1764	24.7609	24.4043	25.2724	24.5019	24.2107	23.3986	23.7525				9	9	9	27.5	27.5	27.5	60.67	0	45.498	1182800000	150
27.3094	25.6383	24.4656	27.153	25.141	26.9467	26.6846	25.0361	27.2643	24.9495	26.1829	26.0179	26.9926	24.8891	24.3406	25.836	26.6788	26.6162	25.6563	25.3009	26.3836	26.1328	25.9405	26.2216	26.949	25.3761	25.2553	26.2126	25.9403	25.6528	25.2373	26.0351	25.3478	25.376	26.9649	26.6875				12	12	12	23.9	23.9	23.9	105.32	0	157.27	3363300000	316
30.7902	29.1021	27.9147	29.6853	29.8276	31.9873	29.7901	31.8461	29.7059	28.6976	29.6295	29.7647	28.7696	29.2928	28.0769	29.3521	29.7039	30.4195	29.3017	29.8267	29.2072	28.6116	30.6781	30.217	28.7986	28.7481	28.9629	28.676	30.8789	27.9374	28.4529	29.1517	28.2637	29.0209	29.8797	30.4888				7	7	7	68.6	68.6	68.6	11.737	0	323.31	37912000000	406
26.5626	26.5119	26.7161	26.3136	26.3672	26.8811	25.3062	26.3383	26.8926	27.0669	26.3427	26.7771	27.3218	26.5502	27.3309	25.8797	26.4857	26.2715	25.9958	26.9047	27.1749	27.4581	26.1568	26.2058	27.3004	27.6409	26.4364	26.4428	26.6553	26.3688	26.4004	26.9898	26.7287	27.589	26.6771	26.5165				8	8	8	34.4	34.4	34.4	42.981	0	323.31	4588400000	179
23.9326	24.3046	25.4519	23.8812	24.3709	24.5848	23.6973	24.5293	23.9299	24.856	23.5943	23.984	24.4012	23.1993	25.5847	24.4951	23.2414	23.3373	24.6449	24.843	24.6157	24.0852	23.9888	25.3256	23.5565	23.6737	24.4228	24.0124	24.2966	24.8823	24.8553	24.5052	24.4186	23.9274	24.3342	24.1655				4	4	4	24.8	24.8	24.8	31.462	0	44.04	947370000	121
26.972	26.7148	27.6241	26.8389	26.9446	27.7345	28.1549	27.5499	26.9871	27.5593	27.9663	27.9234	28.072	28.1144	27.751	27.2311	27.7069	26.4664	26.0184	28.1888	27.9555	27.9743	27.1568	26.8027	26.817	26.0198	28.446	27.722	26.4478	28.2815	28.4058	26.734	27.7912	27.4857	28.307	27.9874				17	17	17	42.6	42.6	42.6	61.054	0	323.31	10445000000	641
26.9813	28.243	28.0934	27.8735	27.242	28.9382	27.8838	28.1367	27.6993	28.5411	27.9366	29.7349	26.7636	26.0422	26.4789	28.6135	28.7819	27.4032	27.4661	26.9632	27.4048	27.7608	27.8545	27.3192	26.482	26.7685	26.3341	27.4058	27.8241	28.0596	30.0368	27.8806	28.2702	28.0907	29.8251	27.1434				6	6	6	17.8	17.8	17.8	48.803	0	323.31	13501000000	290
29.7088	28.7664	29.0484	29.8605	29.3724	30.1493	30.8103	29.9091	30.1069	29.4134	30.07	29.8458	30.2142	30.8653	29.5893	29.7228	29.4854	29.3714	28.6594	29.9507	29.8975	29.1898	29.2585	28.418	29.4687	28.6949	30.8333	29.5544	29.4194	29.9385	29.9361	29.0242	30.3245	29.2903	30.0343	30.0553				21	20	20	39.3	39.3	39.3	72.332	0	323.31	38775000000	824
25.8603	24.209	24.3834	25.627	24.8663	25.8263	26.6684	25.0127	26.2821	24.6409	24.9349	24.9091	25.6638	25.6571	23.8793	24.7528	23.5649	25.7222	24.3742	24.2741	24.8723	24.7924	25.0699	25.1083	24.6931	23.861	24.1316	24.6303	25.5754	23.8463	23.966	24.3719	23.8804	24.2055	24.7384	25.6282				9	9	9	23.9	23.9	23.9	48.344	0	106.78	1324100000	137
31.5315	30.8227	30.7814	31.1875	31.2714	30.8675	31.2131	31.2874	30.9411	31.3247	31.0445	31.4507	31.5024	31.2512	31.2362	30.3867	30.4684	31.1328	30.9024	31.3807	30.959	30.8851	31.6164	30.7384	31.353	31.3925	31.1743	31.0441	31.2793	30.9666	31.1904	31.5388	31.0105	31.3808	31.1506	31.8653				25	25	18	62.8	62.8	50.8	70.897	0	323.31	99263000000	1883
24.8912	24.6403	26.4432	25.2645	24.2485	25.4651	25.5056	25.4623	24.1412	25.2263	24.7154	25.0107	25.5942	24.8871	26.2475	22.9935	24.5599	24.3716	25.0265	25.2269	25.2819	25.052	24.5814	25.532	24.2006	23.6876	25.5552	25.7557	24.4305	25.5833	25.9689	25.5091	25.2003	24.9399	25.625	21.7573				9	9	9	34.5	34.5	34.5	39.233	0	101.31	1601300000	208
27.3519	26.2318	25.7964	27.3489	26.9355	27.2241	27.1952	21.8574	29.2362	25.4952	27.4688	27.3589	25.3895	28.2293	25.446	27.6964	26.7836	25.9151	26.1121	25.7087	26.6299	26.0409	25.7524	25.6871	26.5715	24.7203	27.3334	25.8134	26.3324	25.7486	26.7004	25.9802	26.6815	26.6629	28.7439	29.4728				25	25	25	30	30	30	127.18	0	323.31	4906100000	328
25.5451	25.9896	26.0832	25.7908	26.2284	25.9778	25.4792	26.0235	25.4093	25.9401	25.4761	25.716	26.0419	25.743	26.4073	26.4087	26.1675	26.514	26.5499	26.0177	26.3802	26.2643	25.8658	25.8464	26.3808	27.1162	25.748	26.2594	26.0846	26.0982	25.7668	26.3872	25.9526	26.2352	25.6737	25.4876				17	17	13	30.1	30.1	23.5	96.695	0	264.87	2894600000	247
24.2099	23.1168	23.1885	23.6458	23.9593	24.684	23.4372	25.023	24.1132	23.2674	24.0385	24.0975	24.6865	24.7294	23.4237	22.0599	23.3288	23.6907	22.8206	23.3985	23.8503	23.9764	23.6841	23.078	23.5097	22.1954	24.4649	22.8089	23.274	23.6153	23.1289	22.879	23.6303	23.7036	24.7314	24.6225				7	7	4	51.5	51.5	26.2	23.408	0	48.7	605910000	113
25.0461	26.9642	24.7978	24.957	25.8545	26.0238	25.4978	25.2851	26.3045	24.7274	25.2059	24.8439	24.9676	24.603	23.775	26.7628	28.5505	25.8128	24.928	24.6819	26.4312	25.2685	25.0801	25.3118	25.4098	25.3566	24.1139	24.6059	25.2745	24.2821	24.0909	24.3706	24.5562	24.3633	25.5384	25.4705				2	2	2	6.6	6.6	6.6	38.985	0	168.05	3017000000	95
27.8682	27.0739	27.2153	27.3457	27.1054	27.455	27.5563	28.0086	27.8518	27.0088	26.9864	27.1539	27.5125	27.579	27.2	27.2939	26.0774	27.5767	27.0317	27.5004	27.1436	26.9185	27.3254	27.2238	27.0512	27.5894	26.7732	27.2784	27.7664	26.8662	26.6978	27.2674	26.838	27.0861	27.5909	28.3229				16	16	16	35.3	35.3	35.3	59.256	0	323.31	6865000000	454
27.5744	26.9786	27.4187	27.2516	27.3628	27.4977	27.4265	27.5364	26.4937	27.1709	26.947	27.1878	27.0071	26.8012	27.5219	26.2296	26.7965	27.6329	27.4503	27.4539	26.5067	27.3501	27.4242	27.5754	27.2921	26.9297	27.2358	27.035	27.2567	26.7339	27.0791	27.3705	26.932	27.2857	27.1272	27.3843				18	18	18	26.4	26.4	26.4	101.56	0	273.32	6004800000	311
27.106	27.1266	26.8693	25.5203	26.8682	25.7279	25.6106	26.6024	25.3551	27.1573	25.4477	26.9043	26.2921	25.8047	27.243	26.2277	26.8886	27.0217	27.0339	27.0972	26.5792	27.1739	26.5776	27.1672	26.6185	26.8843	25.9428	27.1669	26.3311	26.2829	26.4536	27.1896	25.1459	27.2043	26.2237	25.9902				8	8	3	36.8	36.8	14	35.054	0	323.31	5665200000	226
26.9632	27.1791	27.5912	27.6068	27.2826	27.3348	27.5645	27.3556	26.9751	27.6308	26.8297	27.4946	27.5907	27.2575	27.5557	26.4212	26.7483	27.3219	27.3071	27.6586	27.434	27.4595	27.5552	27.3815	27.2869	26.8763	27.8115	27.3383	26.9964	27.0774	27.5266	27.7009	27.3688	27.4353	27.5143	26.8473				16	16	10	38.7	38.7	23.6	70.67	0	323.31	7730600000	419
27.2917	26.0673	24.8038	26.7523	26.5703	25.8406	25.3804	26.5926	24.5043	24.9792	25.6005	25.0351	24.9435	23.4522	24.7959	25.5521	23.2204	26.7338	26.191	25.1549	25.8538	25.8432	27.1435	26.3379	25.8839	26.273	24.7519	25.1442	25.7252	24.7422	23.6008	26.1501	25.1816	26.1487	26.8385	26.4023				8	8	8	52.9	52.9	52.9	28.768	0	323.31	2452100000	204
26.729	26.5354	26.6377	26.3465	26.259	26.6501	26.2051	26.7943	25.8766	26.7466	26.0415	26.4454	26.8157	26.3318	26.6812	25.8605	26.2348	26.4856	26.6786	26.7753	25.8334	26.6843	26.7727	26.4846	26.633	26.7868	26.5753	26.8035	26.7503	26.3963	26.6807	26.745	26.3657	26.6874	26.7719	26.7777				16	16	12	46.6	46.6	38.7	54.846	0	323.31	3847800000	315
30.0117	30.1519	30.3224	29.7439	29.2988	32.3811	31.8162	30.5837	32.2327	32.4771	33.0766	31.2515	31.7248	33.0612	31.895	34.2795	32.0907	30.228	29.342	32.0104	31.3971	30.5261	29.4672	29.9666	31.2313	29.4499	32.1494	31.6988	30.0946	33.4636	32.5796	28.7782	33.4189	31.9572	32.4097	29.4561				31	31	31	43.2	43.2	43.2	108.53	0	323.31	213540000000	4791
28.9515	29.1283	29.0489	28.9148	28.9475	31.1237	30.6749	29.0774	30.7064	31.1177	31.4134	29.9578	30.0892	31.4779	30.3857	33.1516	30.6146	29.4846	28.3239	30.8288	30.3678	29.9794	28.1779	28.7012	30.0977	28.892	30.564	30.3575	29.2281	32.1451	31.5208	27.9844	31.5502	30.5332	31.0021	28.3838				24	24	4	31.3	31.3	4.7	108.58	0	323.31	108540000000	2013
30.7885	30.9565	31.9268	31.1518	31.036	33.8252	33.5493	31.7043	33.4553	33.9003	34.7037	32.7922	33.2295	34.8292	33.4275	35.5113	33.7412	31.533	30.7645	33.545	32.9698	32.3529	30.6877	31.1547	32.8299	30.3168	33.7464	32.9917	30.9941	35.2636	34.3909	29.718	34.7902	33.1221	33.485	30.5143				118	118	118	52.1	52.1	52.1	343.67	0	323.31	627000000000	9763
24.8439	26.0294	25.2622	25.9525	25.8726	24.5935	23.7044	25.168	24.3287	25.3668	24.6698	25.3886	25.3595	24.245	25.6246	25.0243	25.2464	25.4709	26.0589	25.2957	25.3376	25.3191	25.4809	25.062	25.7935	25.8206	25.3728	25.3087	25.1783	25.1827	25.0253	26.082	25.3312	25.6938	25.4968	26.7338				11	11	11	27.8	27.8	27.8	55.804	0	108.48	1766200000	161
24.2227	24.9829	25.3949	24.7491	24.5899	24.5086	23.8341	23.168	23.261	25.1961	25.1683	26.2219	25.0623	25.0057	25.5155	25.7686	26.1823	24.7458	24.8344	25.942	25.2829	26.0358	24.7799	23.6469	26.0403	24.2888	25.7796	25.3151	25.61	26.0069	26.4006	24.8065	24.7277	25.1395	24.6819	23.1787				21	21	21	13.7	13.7	13.7	267.29	0	323.31	1651400000	183
21.8282	24.5601	24.5631	26.0616	23.8362	23.5411	23.1097	21.6615	28.3694	23.8115	26.7991	26.8532	25.0437	22.0969	23.4863	22.264	26.7398	22.6791	23.8189	21.4825	23.3475	24.1905	23.6281	22.7265	24.7392	23.5438	25.7993	23.8295	22.4538	22.3235	26.031	24.1854	26.2563	25.39	23.269	30.0509				11	11	11	42.1	42.1	42.1	36.375	0	323.31	2106600000	141
27.0578	27.1102	26.3224	26.9919	27.0555	26.7283	27.5505	26.805	26.5774	26.1831	26.9351	26.3977	26.9107	26.8368	26.1118	26.3114	26.2429	26.5473	26.7392	25.9713	26.5631	26.7599	26.5045	26.84	26.396	26.6084	26.3554	26.5073	26.9973	26.2384	26.0395	26.5206	26.1309	26.6262	26.3681	26.1816				12	12	12	37.1	37.1	37.1	54.548	0	323.31	4134400000	303
28.3112	28.5333	28.7305	28.795	28.5835	28.1245	28.0807	28.3504	27.8887	28.8625	28.3419	28.7607	28.1195	27.956	28.937	28.4789	27.9921	28.3255	28.5109	28.8476	28.2072	28.6998	29.1177	27.7621	28.8323	29.0504	28.8987	28.9895	29.0244	29.0829	29.3271	29.0194	28.7342	28.8726	28.2282	28.4603				22	22	22	41.1	41.1	41.1	69.842	0	323.31	18159000000	963
27.4855	28.0435	28.0418	27.1132	27.449	27.8242	27.1803	27.2745	26.8388	27.8406	27.2707	27.3609	27.2135	26.8886	28.6512	27.6024	28.1932	26.8923	27.4483	27.9793	27.9978	27.9466	27.9114	26.8789	28.4026	28.3717	28.1249	28.1426	28.0187	28.1306	28.4281	28.2961	27.5339	27.7133	27.8223	28.2098				23	23	23	58.3	58.3	58.3	82.704	0	323.31	11148000000	585
28.3119	26.136	25.2052	29.118	27.3917	27.3789	27.1257	27.4208	28.5359	26.2655	27.0107	26.7923	26.939	26.7714	24.0026	26.8069	26.1067	27.1272	26.6964	25.8879	27.1913	26.7278	26.1921	27.6378	25.0032	25.6012	25.3776	26.1848	28.1714	26.8266	25.071	27.4982	27.3002	26.8069	28.642	27.567				2	2	2	22	22	22	27.963	0	112.7	9328900000	309
27.5106	28.1312	25.2255	26.846	27.6075	27.0151	27.1351	27.7524	27.325	26.0036	26.3494	26.824	26.2019	26.6129	24.795	27.8616	27.9985	26.8992	25.8774	25.5056	26.9373	26.5911	26.5487	26.8758	25.9713	26.0682	25.2154	25.855	27.5175	25.2345	24.9943	26.1967	25.5257	25.8989	26.8809	28.0669				3	3	3	7.1	7.1	7.1	44.96	0	75.015	5148000000	192
29.2409	29.4506	28.7094	29.2786	29.1124	28.8545	29.4909	28.9313	29.2112	29.0248	29.1721	29.0751	29.1492	29.2692	28.8816	29.6098	28.8784	29.2389	28.8042	29.3925	29.5539	28.7183	28.891	29.277	28.8156	29.0062	28.9231	28.8394	29.2397	29.1237	28.9347	29.2672	29.0612	29.091	28.7561	28.7596				18	18	18	71.1	71.1	71.1	49.973	0	323.31	23900000000	684
29.9107	29.8643	29.8891	30.2059	30.0016	29.7618	29.6231	30.1378	29.47	30.4551	29.6362	30.1402	30.0423	29.7682	30.4379	29.2553	29.6844	29.6198	30.0552	30.498	29.8649	30.1181	30.3385	30.089	29.9513	30.2636	30.5083	29.9646	29.7917	30.0607	30.1369	30.6159	30.331	30.1836	29.9008	29.9403				31	31	31	52.7	52.7	52.7	95.337	0	323.31	51331000000	1535
26.2689	25.724	24.3431	26.3483	26.524	27.0723	28.2097	27.5845	27.0979	26.5777	27.4225	26.9346	26.7827	27.9976	26.8998	26.6499	26.8037	26.6413	25.6932	27.1299	26.771	25.9563	26.0638	25.802	26.5348	25.9855	27.8779	26.8454	26.2361	27.0464	26.9867	26.2279	27.5437	26.6843	27.4413	27.7286				13	13	13	28.2	28.2	28.2	72.932	0	323.31	5671900000	271
26.8033	26.5777	25.4363	27.0424	26.5958	26.4294	26.613	26.4947	26.0481	25.4957	26.3975	26.1742	25.7074	26.0095	25.2938	25.7705	25.2751	26.8028	26.6204	26.3617	26.3322	25.6638	26.5173	26.5423	26.2261	26.0844	25.8446	26.1251	27.2075	25.785	25.2034	26.5661	26.2	26.0807	26.6988	26.5902				5	5	5	36.6	36.6	36.6	19.595	0	237.5	4511300000	192
26.2748	26.3629	25.7931	26.6454	26.4377	26.3809	26.0124	25.7379	26.3431	25.9421	25.9339	26.119	26.1219	26.2192	25.3005	26.3174	26.257	25.7183	26.6893	25.6325	26.2978	26.6165	26.8009	22.8967	26.2742	27.1718	25.0526	26.9728	26.9276	25.7179	26.0542	26.4799	26.0246	26.3766	25.6221	25.96				9	9	9	48.2	48.2	48.2	36.294	0	309.35	3479300000	234
33.3078	32.7498	32.3908	32.7556	32.7762	32.6933	32.7348	33.7613	31.8536	32.7975	32.2326	32.5871	33.415	31.5364	32.3897	32.2008	31.6708	33.4315	32.9932	32.7576	31.7181	33.0807	33.1201	32.7944	32.7646	33.424	31.9385	32.7756	33.6272	32.0505	32.2232	33.1101	31.7364	32.5731	32.5489	32.7638				42	42	35	72.9	72.9	63.6	70.288	0	323.31	324900000000	5087
26.0504	26.4457	25.7642	25.8972	25.7327	26.0451	25.4188	26.0922	26.9276	26.8865	26.4569	26.1358	26.397	25.3195	25.7756	27.0626	27.5213	25.8136	25.742	24.9724	27.2262	25.9884	25.245	25.7593	25.2541	27.2389	27.2026	25.9035	26.1598	26.9755	26.8216	25.8114	27.7962	26.4409	25.592	25.9263				21	15	14	47.6	40.3	38.1	70.81	0	323.31	5117000000	240
27.4436	26.9513	26.5352	27.2822	27.2919	26.969	26.8344	27.1545	26.3827	27.0298	26.7985	27.1876	27.3527	26.7743	26.8126	26.6791	26.0499	27.6075	27.3849	26.3885	26.5931	26.7709	27.2039	27.14	26.9338	27.4529	26.3772	26.9524	27.3695	26.5452	26.4141	27.197	26.5605	27.2741	26.6252	27.1521				14	14	14	35.9	35.9	35.9	81.224	0	305.67	5393000000	356
25.2101	26.0551	26.0275	25.3761	24.0342	26.173	26.2836	25.7931	25.1185	25.6713	25.9509	26.0382	24.5571	25.9329	26.1601	25.4728	27.1847	25.5239	24.8334	25.7486	24.8995	26.016	25.1424	25.8603	24.6804	23.3204	26.1946	26.2644	24.3976	26.4795	26.4473	25.5225	25.862	25.1192	25.6356	24.9344				8	8	8	36.3	36.3	36.3	35.079	0	323.31	2530000000	156
23.2385	23.7884	24.6319	23.9173	24.0026	22.9861	23.4223	23.2171	24.1307	23.5507	23.0744	24.1707	23.61	23.4004	23.8442	22.9004	22.2186	24.2891	23.6223	23.3529	23.6318	23.8721	23.6085	23.5871	23.9338	24.1322	23.6603	23.5101	23.042	23.1108	23.9953	23.562	23.4831	23.8631	23.8865	25.4193				7	7	7	15.8	15.8	15.8	76.482	0	55.076	528670000	115
26.8234	27.0857	26.6596	26.709	26.5845	26.8501	27.005	26.6421	27.1047	26.6363	26.7257	26.5154	26.9525	26.8373	26.2903	27.0805	26.8662	27.0075	26.9745	26.3173	27.2306	27.1785	26.5086	26.3346	26.9311	27.6082	26.1664	26.9099	26.7037	26.5409	26.5918	26.9629	26.6075	27.2001	26.7604	26.7709				12	12	10	46.6	46.6	39	43.066	0	323.31	5013200000	284
29.6972	28.6983	27.0212	26.2011	29.2342	27.4205	28.6702	29.3368	29.5538	29.474	29.6903	26.3148	27.1681	28.865	28.5159	29.5382	28.842	29.0861	29.1884	28.062	28.8732	28.6343	29.4436	29.5068	29.045	29.0606	28.1517	29.5341	28.9378	28.6615	26.6925	29.3502	28.833	28.947	30.2247	28.4281				3	3	3	35.7	35.7	35.7	12.476	0	65.809	23135000000	378
26.6079	25.5331	25.7374	26.8417	26.2014	26.202	26.6875	27.1142	27.3923	26.4155	27.0151	26.6824	26.6483	27.7789	26.9497	26.8305	26.0621	26.9404	25.5503	26.2101	26.1299	26.9156	26.5628	23.3741	26.1829	25.9846	27.1059	26.7991	26.8899	26.7873	27.1096	26.3608	26.9079	26.8584	26.4776	26.7859				8	8	8	23	23	23	59.177	0	323.31	4186400000	149
28.8489	28.6392	27.3593	28.296	29.1719	27.5039	27.8604	28.6912	27.7993	28.7085	27.8459	28.501	28.6461	28.1478	28.2293	28.0799	26.8989	28.7984	28.9282	28.3225	27.8631	28.8892	28.8808	28.6167	28.8293	29.7565	28.0244	28.322	28.9737	28.1019	28.3796	29.2963	28.0515	29.2064	27.4829	28.6782				9	9	9	27.2	27.2	27.2	54.013	0	323.31	16849000000	445
26.7466	25.9465	26.4553	26.3384	24.5384	25.7934	25.8835	26.2396	25.4424	25.4878	25.3482	25.0239	25.6089	25.5188	25.9553	25.2053	24.9157	26.1727	26.33	25.8623	24.6302	25.3519	25.4966	26.5197	25.2182	24.3932	24.8042	25.9566	25.8003	25.1777	25.3221	24.6081	25.1338	25.5685	25.5148	24.1483				3	3	3	56.6	56.6	56.6	9.3959	0	82.738	2044100000	98
28.479	27.9256	28.1612	28.0913	27.6291	28.6033	28.137	29.0539	28.0929	28.0321	27.7731	28.4599	28.7023	28.1413	28.1336	27.8842	27.7742	28.6339	28.2221	28.7149	28.5225	27.7484	28.7282	28.3365	27.9697	27.4584	27.7585	28.0732	28.5062	28.0364	28.1137	28.5448	28.0989	28.3993	28.2647	26.603				13	13	13	51.1	51.1	51.1	36.573	0	323.31	12970000000	406
24.4522	23.6946	24.727	25.2281	25.0535	26.2013	25.1551	25.0067	25.3376	25.1623	23.0444	24.1793	24.5986	25.8947	25.3127	24.7697	24.1674	24.9321	24.343	25.5689	24.5035	24.3536	23.4679	23.9482	24.555	24.1594	25.6245	24.9572	24.6194	23.7787	24.1286	25.5098	25.5626	24.0479	25.2778	25.1858				10	10	10	40.3	40.3	40.3	44.681	0	164.61	1278700000	190
32.3668	31.9454	31.4716	31.9031	32.3691	31.9193	31.3463	32.2952	31.8138	32.5531	31.829	32.9996	31.6409	31.4298	31.5016	31.7219	30.9855	31.9806	32.3332	32.0105	31.6557	32.1214	32.724	31.6585	31.9596	32.5945	32.1362	31.5313	32.415	31.7922	32.233	32.3886	31.8014	32.4061	32.157	32.2499				34	34	5	68.4	68.4	9.4	57.936	0	323.31	208480000000	3609
29.5515	28.8526	28.7747	29.917	29.6596	30.3027	31.0785	29.7922	30.3932	29.6139	30.6635	29.6962	30.2899	31.0345	29.9295	29.8671	30.1591	30.0113	29.0188	30.4823	30.4571	29.6718	29.3108	28.9229	29.7924	28.8887	31.0034	29.8645	29.4168	30.2133	30.2987	29.0721	30.4745	29.8912	30.8631	30.4762				27	27	25	39.2	39.2	37.5	92.468	0	323.31	47236000000	1145
26.3486	27.3221	27.4766	26.9919	27.3314	26.9315	26.4316	26.2772	26.5795	26.6239	25.8845	26.4377	26.5469	25.9287	26.0299	26.258	27.39	25.4929	26.933	25.2509	22.003	25.6136	26.796	27.6653	27.1589	26.5152	26.6873	27.9497	26.3003	26.3618	26.326	27.0392	25.2262	26.7238	25.8571	26.5447				5	5	5	19	19	19	23.656	0	323.31	5361600000	172
27.7827	27.6747	26.7554	27.4661	27.2831	26.5274	27.1792	27.2723	26.8061	26.7409	26.9925	26.5965	26.7159	26.2503	26.2864	26.8403	25.8318	27.6567	27.4143	26.4484	26.9408	26.8939	27.2961	27.3289	25.9198	26.2211	25.8374	27.0149	27.5363	26.436	26.0586	26.8434	26.615	26.9114	26.0695	26.4553				4	4	4	57	57	57	10.192	0	176.97	5135700000	144
26.3822	26.0547	26.8541	27.0603	26.0301	26.3921	26.5911	25.8925	25.1782	26.7981	25.7972	27.0822	25.9253	25.9696	27.7844	25.0714	25.414	25.2045	26.8287	27.1437	26.281	27.0835	26.9147	26.3492	26.0921	25.3966	27.3842	27.1418	26.0412	27.2802	27.5231	26.9007	26.1024	26.7429	25.7507	23.724				10	10	10	37.7	37.7	37.7	64.132	0	323.31	5282800000	320
27.3886	27.2877	27.3533	27.8956	27.9792	26.9726	27.1368	27.5212	27.2352	27.5614	26.9719	27.8367	27.2978	25.728	27.358	26.4554	26.314	27.4296	27.7789	27.552	27.3473	27.8689	28.099	27.3552	27.32	27.9832	27.4317	27.2822	27.4564	27.1783	27.5714	28.0964	27.0487	27.6042	27.6258	28.3335				11	11	11	26.7	26.7	26.7	57.136	0	323.31	7478400000	334
24.6633	24.3558	24.4853	23.9696	22.7503	24.3137	24.6022	25.9409	24.4434	24.8487	24.6458	24.298	24.4028	24.4918	23.4462	22.9476	24.6372	23.5735	24.4207	24.564	24.2136	24.7615	24.8322	24.4277	24.5222	24.5231	24.6012	24.7129	24.7946	24.9646	24.9638	24.8378	24.4428	24.5688	23.9384	23.237				5	5	5	35.1	35.1	35.1	35.853	0	147.39	1021900000	107
28.5994	28.0759	28.9359	28.1173	27.8029	26.7655	27.5529	27.5358	27.1342	28.2831	27.276	27.6801	27.9463	27.6244	29.303	26.7314	25.6323	27.9713	29.0212	28.3689	27.4272	28.2343	28.1389	28.2234	27.7398	28.5405	26.8159	28.787	28.3797	27.3357	27.9376	28.4122	27.0311	28.7367	26.3755	26.9162				4	4	3	26.6	26.6	22.4	21.429	0	15.096	10279000000	84
28.1517	28.609	28.6384	28.4658	27.8533	26.9858	27.1217	27.6193	26.4954	28.5129	27.27	28.4902	27.0417	26.3143	27.9778	26.8984	26.1831	27.3498	28.7871	27.3604	26.7205	27.804	28.3468	27.8119	28.143	29.2831	27.4294	27.6776	27.9378	27.9155	27.8864	28.8904	27.2214	28.1763	26.8638	27.5217				17	11	11	35.7	26.5	26.5	69.412	0	323.31	10450000000	274
24.7366	24.987	26.3689	25.1634	24.6215	25.2737	24.9447	25.82	24.4278	25.4921	25.0395	25.2077	26.615	23.4628	26.8526	25.9577	24.765	25.0458	25.54	26.4123	25.0479	26.0489	25.5565	25.5512	26.1978	26.7489	24.6233	25.6207	25.6598	25.0946	25.5652	26.0189	25.1834	25.9851	24.5409	25.2586				13	13	13	21	21	21	94.492	0	323.31	1714100000	101
26.8506	27.3126	27.1523	26.8283	26.3789	27.1929	26.4434	27.0208	26.9101	27.1974	26.6473	26.9142	27.1879	26.3583	27.4652	26.9691	26.5479	26.438	27.1932	27.9618	26.9477	27.1182	27.2383	27.6574	26.7561	26.8313	27.5079	27.5954	26.8737	27.0862	27.0951	27.115	26.894	26.9574	27.5179	26.9218				5	5	5	22.2	22.2	22.2	31.324	0	323.31	5488500000	227
30.087	28.9802	28.4741	29.3001	29.3153	23.2134	30.0215	29.172	29.1717	28.6461	29.1758	28.8147	28.2599	29.0337	27.5254	28.8812	27.5051	29.7044	28.6399	28.389	28.4765	28.852	28.9351	28.8853	28.935	29.1243	27.7188	28.3598	30.5618	28.0342	28.2736	29.0322	28.3108	29.1147	28.6795	29.6595				4	4	4	8.4	8.4	8.4	81.537	0	323.31	20023000000	144
27.1147	28.4886	27.8886	26.6278	27.4767	26.8009	26.3739	27.9942	26.9477	27.7218	27.6144	27.7287	27.7005	26.5985	28.2578	27.8943	28.3541	26.7768	27.3869	28.2542	29.2815	28.2888	27.2634	28.7014	27.8043	26.6172	27.2	28.5399	27.7128	27.8382	27.6067	27.6143	26.472	25.8625	26.552	25.127				9	3	3	55.9	21.7	21.7	15.144	0	323.31	9973200000	216
29.5159	29.3645	28.7565	29.3345	29.137	29.8796	29.9261	29.6822	28.7583	28.6495	28.6377	29.0106	30.01	29.1167	28.6077	28.4307	28.2188	30.1159	29.2142	28.9564	28.5048	29.1576	29.1525	29.3489	28.752	28.6001	28.1899	29.1421	28.6045	28.4544	28.7131	29.2097	28.5429	28.7949	28.7162	29.2973				15	15	13	69.7	69.7	59.2	30.375	0	323.31	23539000000	526
23.9276	24.3584	24.5963	24.7882	24.8291	23.8008	24.1399	24.129	23.5943	24.4065	23.9353	24.6148	23.5702	24.2132	24.4538	23.1549	23.1387	24.3999	24.6276	23.914	24.3324	24.769	24.5845	23.7506	24.2488	24.3286	23.4497	24.2775	24.5999	23.877	23.8595	24.5948	23.7336	23.9923	24.1813	24.5411				2	2	2	12.6	12.6	12.6	36.688	0	103.81	774970000	98
24.8854	24.4651	23.406	25.2847	24.6047	23.8715	23.691	22.815	24.9652	24.4554	24.9631	24.2912	24.2629	25.3105	23.3101	24.2194	24.3117	23.8346	24.3345	22.6283	24.5082	24.149	24.6047	24.1598	24.1707	23.5777	24.4954	23.8953	24.5029	23.2177	23.8877	24.4266	23.3557	24.0507	24.3254	23.9645				5	5	5	10.5	10.5	10.5	76.074	0	124.17	910730000	130
24.2573	23.9237	24.7477	24.3422	24.5892	23.4779	23.5443	24.2534	24.3596	24.6622	23.7999	24.4675	24.5008	23.8182	24.7106	23.8593	22.8282	24.5693	24.8769	23.9	23.5757	23.4312	24.4684	24.3309	24.5352	25.1882	23.9788	24.8213	24.6569	24.1312	24.4425	24.9153	23.7315	24.4649	23.5055	24.6669				5	5	4	12.6	12.6	10.7	59.024	0	12.178	799400000	108
28.9679	28.4358	29.0179	28.4818	27.9611	27.9418	28.9613	29.3554	27.4898	29.5444	29.0286	29.6712	27.2382	28.9148	28.9749	28.4332	27.2659	28.3271	27.8584	27.5462	27.3442	29.5643	29.1234	28.2861	27.9088	27.9174	29.6058	27.81	29.0381	30.0258	30.0182	28.4132	28.1426	27.1799	27.0266	27.7952				3	3	3	16.4	16.4	16.4	22.58	0	172.52	17323000000	67
27.9039	28.7065	28.4525	28.5962	28.2854	27.8067	28.4734	28.2127	27.2064	29.2988	29.0534	29.1966	28.2219	27.3189	31.2616	28.6416	27.1357	27.7207	28.3396	30.1747	28.391	29.5779	28.0889	28.6674	28.8136	27.8004	29.5487	30.7589	27.9166	29.9024	30.4974	28.2925	29.0329	29.5698	27.708	26.1738				5	5	2	21.7	21.7	9	22.35	0	22.997	23369000000	110
22.3206	22.6399	26.6134	23.7608	24.7712	25.4242	25.8056	25.5427	24.4999	24.8562	25.1257	25.0909	25.1469	25.7835	25.7825	24.9406	24.637	24.5639	24.112	26.2476	24.989	24.2175	24.5326	23.2585	25.0725	23.7879	25.7925	24.6018	24.3651	24.9265	24.6977	24.0293	25.2986	25.4334	24.7271	24.3056				14	14	8	22.3	22.3	12.3	109.73	0	323.31	1334500000	132
24.3322	24.889	24.1017	25.0936	25.7905	24.893	25.8639	24.6414	25.7463	24.547	25.3412	24.7793	24.4447	24.9097	23.3287	25.2593	25.6655	24.4504	23.4334	24.0449	24.7592	25.1117	24.7049	24.5982	25.3951	25.2633	23.6199	24.4581	25.0349	23.6806	24.3878	25.1929	23.3159	24.9905	25.3131	26.283				4	4	4	14.8	14.8	14.8	46.374	0	314.6	1219400000	95
27.6446	27.0822	25.7889	27.3027	27.073	26.6047	26.58	27.0021	25.8277	27.1344	26.3119	26.8388	25.8601	26.1232	26.4526	25.2813	25.7321	26.8534	26.7351	26.5953	26.3118	27.5305	27.332	27.4792	27.2209	26.8771	25.9717	26.4906	26.8434	25.9179	26.0255	27.0424	25.6292	27.0266	27.0012	27.3605				4	4	4	24.2	24.2	24.2	17.302	0	60.428	4347300000	190
24.73	25.141	23.5659	25.7392	24.9727	24.0239	25.285	24.5972	24.2985	24.4641	24.4081	24.428	25.0194	24.4733	23.9822	23.8978	23.9801	25.5887	25.0103	24.5099	24.4291	24.1057	24.9832	24.8476	24.9233	24.872	24.3801	24.1131	24.4333	24.1735	24.3135	25.0741	24.4212	24.6448	24.3088	25.9563				4	4	3	33.3	33.3	27.7	31.947	0	185.26	2206100000	269
26.5623	26.5581	26.6907	26.0634	26.3675	25.7736	25.3932	25.9327	25.3682	25.3093	25.4799	26.0687	25.5903	25.1907	25.7458	26.1081	25.3213	26.6488	26.0318	25.2457	25.2654	26.726	26.1558	26.2803	25.9142	26.3591	24.9348	25.7991	26.1873	25.2295	25.2128	26.1215	25.6943	25.9792	24.6817	26.3085				9	9	9	36.6	36.6	36.6	46.247	0	321.91	2492400000	203
25.6114	25.5071	25.601	24.871	25.6872	25.9604	25.5515	25.9147	25.9881	25.498	26.1956	25.6258	25.8717	25.5193	25.2063	27.1086	26.8831	25.7263	25.1891	25.3201	26.8612	26.0593	25.6053	26.0832	25.6965	26.1626	25.9897	25.648	26.1604	25.7303	25.364	25.7505	26.0106	25.8621	26.063	25.664				16	16	3	40.7	40.7	7.6	79.994	0	323.31	2662500000	308
22.7736	23.6076	22.5117	22.7152	23.4654	22.9818	22.4757	22.8531	22.1596	23.4783	22.7832	24.0379	21.7221	21.5402	22.9442	23.9586	24.5884	22.4243	22.6362	22.948	23.4653	23.3339	23.3986	23.4847	22.8479	22.9352	23.3885	22.3378	22.8859	23.3592	22.7165	23.1555	23.1685	23.7244	22.9863	23.7544				6	6	6	14.6	14.6	14.6	66.69	0	143.7	402510000	108
27.3683	27.8381	28.8615	28.6612	27.9759	27.9506	28.239	27.867	27.3148	28.4524	27.7589	28.8366	27.9402	28.3304	28.8162	27.6398	27.3524	27.6601	28.0032	28.9711	27.9267	28.2496	28.3735	28.2511	28.2752	27.5758	28.4717	28.6551	28.2318	28.7135	28.73	28.5412	28.1006	28.5592	27.6961	28.0061				17	17	12	33.9	33.9	24.4	69.147	0	323.31	13602000000	477
27.7084	27.8688	28.218	27.5597	28.6023	27.478	27.2243	27.9355	27.3075	27.908	27.2645	28.108	27.6952	27.4555	27.8898	27.7005	26.9549	28.0506	27.9134	28.0285	27.5273	27.8035	27.8029	27.9714	27.9693	28.8535	27.321	27.9238	27.765	27.5971	27.7077	28.0659	27.3005	27.8998	27.245	27.9098				20	20	18	43.2	43.2	39.6	85.018	0	323.31	11072000000	636
27.864	27.1655	27.319	28.2148	27.9852	28.3624	28.7191	29.0773	28.1018	27.3111	28.0943	27.2471	27.1427	28.2642	27.4036	27.1424	27.6464	28.4541	26.6767	27.8249	27.0322	27.1551	27.658	28.2324	26.988	26.9135	26.4823	26.8134	28.2764	27.1229	27.0481	27.3546	26.8621	27.4732	27.5983	28.0121				5	5	5	25.2	25.2	25.2	26.152	0	154.37	8790600000	215
26.3202	26.9611	26.1468	26.2832	26.287	26.0011	25.5455	26.5082	25.5088	26.1657	25.4991	26.3748	25.8528	25.4746	25.8025	26.2521	26.7988	26.1696	26.5102	25.9351	25.5713	26.133	26.1804	26.0696	26.4479	27.1476	26.1425	25.8185	26.1672	25.9787	26.0134	26.6054	25.9343	25.9594	26.4172	26.3169				16	16	16	52.2	52.2	52.2	49.203	0	323.31	3105500000	270
28.2535	28.2584	28.1295	28.3354	28.7968	27.9369	27.982	27.8153	27.4659	28.1881	27.6917	28.3534	28.1318	27.8113	28.155	27.7519	27.5144	27.805	28.5493	28.3698	28.1872	28.5554	28.1332	28.0132	28.5034	28.9779	27.873	27.8863	28.0787	27.8592	28.0012	28.6927	27.6773	28.1097	27.9585	28.6551				19	19	19	55.8	55.8	55.8	60.343	0	323.31	13634000000	771
24.2703	25.0465	27.3939	26.2449	25.0605	26.6633	26.8631	27.4143	25.8748	26.9857	26.454	26.8147	26.6393	24.5493	25.7653	25.9059	27.4306	26.2584	26.2404	28.2712	25.8675	25.3252	26.2985	26.0697	25.9901	24.2625	26.9719	26.5579	26.6306	26.4607	27.0553	26.5123	26.9846	26.3666	26.6678	25.4705				12	12	12	39.3	39.3	39.3	49.966	0	309.07	4203600000	152
26.8223	27.4215	28.5651	27.7276	27.1196	27.2792	27.2746	27.451	26.5278	27.8042	26.8067	27.2902	27.6063	27.3823	28.2105	26.2357	27.152	26.8522	28.1431	28.1803	27.2502	27.34	27.2738	27.7165	27.1381	26.9315	28.2739	27.4963	26.5358	27.6581	27.7188	27.833	27.3499	27.2448	26.9535	26.158				6	6	6	29.8	29.8	29.8	29.225	0	110.23	7320800000	187
26.7152	27.678	27.6344	28.0012	27.854	28.4732	27.3163	26.9874	28.3773	27.854	28.1682	27.9998	27.5469	29.1833	28.7087	28.2278	28.8838	27.5946	27.3246	27.367	28.5385	27.6344	26.0312	26.7859	27.8692	27.6239	28.9847	28.3337	26.8091	28.5417	28.4693	27.4682	28.3977	27.7561	27.8812	28.4937				27	27	27	38.5	38.5	38.5	123.8	0	323.31	12148000000	518
24.4127	24.825	24.916	25.2251	25.7675	24.7153	24.6024	23.3885	24.3232	24.2196	24.3884	24.876	24.5779	24.3777	24.2316	23.8778	24.4787	25.3063	24.5215	24.2069	24.8631	25.3593	24.3563	24.4683	24.7624	24.8232	24.2306	24.6891	24.1101	24.757	25.1415	24.6233	24.3977	25.1267	23.7118	24.8865				8	8	8	8.1	8.1	8.1	232.3	0	155.34	1128600000	122
30.258	29.7618	28.6471	29.8852	30.039	29.442	30.0054	30.0181	29.7387	30.1426	29.9923	30.7759	29.9081	29.4083	29.1763	29.3859	28.8964	29.4282	29.8033	28.9573	29.7159	30.2473	30.1065	30.0321	29.3065	29.6324	29.4894	29.7989	30.0168	29.4144	29.0946	30.0679	29.6148	29.8587	29.885	29.9706				14	14	14	68.9	68.9	68.9	28.804	0	323.31	39089000000	667
26.1253	25.5845	24.3957	26.0573	24.2763	24.7821	26.2245	26.1752	24.6907	25.4939	25.7979	25.0799	26.1941	25.3389	25.1317	24.4738	24.095	26.0837	25.3269	25.1694	25.003	24.7676	25.5618	25.8167	25.8175	25.1439	25.3253	26.1863	25.3905	24.9233	24.8442	26.0021	25.0212	25.0484	24.0864	23.6171				3	3	3	44.4	44.4	44.4	12.587	0	323.31	1753800000	56
27.176	27.0439	27.7831	27.4713	27.2876	27.3921	26.7844	27.4757	26.6095	27.6591	27.3553	27.5093	27.6429	27.3763	28.4149	27.3329	27.3457	26.7416	26.8582	28.5881	26.9209	27.2879	27.872	26.9532	27.6121	27.1953	28.1241	27.8993	27.204	27.9421	28.2348	27.663	27.9366	27.2079	27.6449	27.0039				15	15	15	23.8	23.8	23.8	76.613	0	323.31	8252700000	440
25.601	26.96	26.9391	26.9404	26.8393	26.5548	26.8169	26.431	26.2566	26.1415	26.3561	26.5677	26.8421	26.4851	26.8812	26.7374	26.1876	26.8623	26.6909	27.0476	26.0783	26.6455	26.2195	26.1877	26.6576	26.8175	26.4771	27.1287	26.1909	26.6497	26.8379	26.5131	26.2718	26.6716	26.14	26.6667				20	18	17	29.9	27.8	27	102.48	0	323.31	4221900000	377
23.3467	24.657	24.2785	23.7439	24.3489	23.2717	23.6348	23.8605	23.1968	23.523	23.5028	23.6261	23.5677	22.9301	22.7536	23.2741	22.7269	23.4311	24.2714	23.8199	23.4625	23.845	23.551	23.9277	24.1024	23.7158	22.5955	24.0197	24.6885	23.1226	22.9337	23.536	22.7478	23.418	24.24	23.0364				4	4	4	29.1	29.1	29.1	31.441	0	150.74	511620000	89
24.5318	23.3173	24.5796	24.4302	23.8863	24.3786	24.1089	24.7948	23.5242	24.2159	23.3086	23.5326	23.444	23.325	24.3396	25.6919	24.7918	24.4203	24.1115	24.6471	23.8538	24.4	23.9653	24.0604	23.3569	23.6936	23.9017	24.7627	24.2661	24.245	23.6612	23.3691	23.6067	23.7297	24.3802	22.9782				6	6	6	33.3	33.3	33.3	27.391	0	169.43	807390000	99
21.4563	23.8753	23.2123	23.6552	23.611	24.4977	22.8507	23.6556	22.9613	23.674	23.1181	22.5144	24.0029	23.1078	24.5434	23.2864	23.7639	22.9593	23.2929	23.4659	23.5297	22.4404	23.1576	23.7892	23.5222	23.147	23.8247	23.3953	21.9504	22.1771	23.1942	23.4227	23.9186	23.1498	24.8022	22.8674				8	8	8	21.1	21.1	21.1	62.094	0	323.31	532600000	141
25.6925	25.153	25.5646	26.1428	25.7263	25.9131	26.3876	24.732	25.8849	25.1648	25.392	25.537	25.8434	25.8311	25.1802	25.1118	25.2576	25.9274	25.8516	24.1605	25.8618	25.25	25.1398	25.7446	25.2047	24.8075	25.3612	25.4981	25.1206	24.8314	24.7185	25.4316	25.6502	25.9548	25.0351	26.2158				9	9	9	50.7	50.7	50.7	33.824	0	13.873	2064100000	147
27.6435	26.2626	25.5213	27.1737	24.5393	27.4686	27.9674	25.7055	29.1712	27.4196	29.2889	27.6351	26.5806	26.0789	26.3158	27.7917	27.0252	26.1285	25.4629	24.6511	27.3231	25.5455	27.7351	25.8491	26.4343	25.2525	26.8085	26.3059	27.4997	26.285	26.1455	25.6063	28.1754	25.7227	27.9974	28.1766				6	4	4	35.3	26.9	26.9	23.602	0	323.31	6370500000	203
23.7143	24.7914	24.6934	24.2244	25.8497	24.3026	24.8195	25.4813	23.621	25.6183	23.8141	25.5062	24.707	24.3113	24.7409	25.2935	24.3612	24.5155	25.1932	25.0109	24.7693	23.8532	25.4497	25.5821	25.3565	25.9046	24.2337	24.2617	24.2008	25.1922	25.2228	25.9568	24.7345	25.3558	24.8622	24.9483				14	14	14	20.6	20.6	20.6	105.43	0	221.77	1409500000	162
32.6166	31.6756	30.4436	31.3776	31.7351	32.7169	31.6154	32.2259	31.7255	30.5794	30.7291	31.1869	32.2572	30.7917	29.5529	31.2918	30.2751	32.7121	31.6104	31.3376	30.8197	30.8305	31.5332	31.6143	30.7508	30.3655	29.953	30.7942	32.8423	29.7849	29.9324	31.4508	29.8369	30.2063	31.9864	31.0725				23	23	23	69.5	69.5	69.5	49.955	0	323.31	147060000000	2823
27.1189	26.7227	27.1759	27.3479	26.7877	25.4496	25.0129	26.7667	24.8961	26.5333	25.9292	25.7191	25.4718	27.2079	26.2378	24.6586	25.3254	26.0761	27.1319	26.431	26.5226	26.7248	26.4525	26.0643	25.474	26.6375	26.0079	27.0445	26.4817	21.5183	25.761	25.9298	27.1744	26.9008	26.3353	26.8684				4	4	4	31.9	31.9	31.9	29.38	0	137.76	3312800000	100
26.9751	27.6516	27.3375	27.707	27.2415	26.6626	26.968	27.2541	26.5329	27.5298	26.7013	27.2681	26.5823	26.6988	27.6626	26.6328	26.5127	27.1349	27.7169	27.0831	26.5862	27.6447	27.5021	27.3788	27.1939	26.9836	26.9798	27.5017	26.9719	27.2955	27.7336	27.9478	27.2049	27.7177	25.8756	25.7051				11	11	11	30.9	30.9	30.9	50.315	0	323.31	6386100000	256
25.219	26.0683	24.952	25.971	26.0566	25.2969	25.0137	26.4606	25.305	25.6098	25.5807	26.3351	26.6506	24.8038	25.6416	26.2002	24.7293	25.6303	26.2538	24.2003	24.9858	26.5598	26.3929	26.2217	25.8228	25.3402	24.827	25.4298	24.994	23.7	24.9841	25.9026	25.1284	25.3789	25.9424	25.4749				6	6	6	68.5	68.5	68.5	17.699	0	281.39	2407000000	199
25.1152	28.4637	25.5637	26.1618	25.799	27.9901	24.6537	26.0979	24.1936	25.6747	23.8043	24.3214	26.1773	23.4963	26.7162	24.3714	27.3469	26.3463	26.3229	25.4645	25.5417	25.898	25.5808	26.674	25.9516	26.3947	24.6473	25.3363	24.8856	25.1402	25.2237	25.8516	26.3011	26.2158	27.3964	24.6722				16	16	13	38.8	38.8	31.4	75.519	0	323.31	3491400000	196
28.0011	27.5317	27.2881	26.895	27.1549	27.5574	27.1793	28.0824	27.4206	27.4181	26.9038	27.222	27.4417	26.9937	27.4155	27.3668	27.7244	27.9563	27.6338	27.7616	26.8794	27.4923	27.6574	28.3757	27.4816	28.2349	26.7352	27.5306	28.0681	27.0606	27.269	27.5749	26.4582	27.2776	28.1504	27.3365				9	9	9	46.1	46.1	46.1	26.489	0	323.31	8453700000	390
26.2265	27.1371	26.542	26.8097	25.9278	25.736	26.0139	26.116	25.4405	25.7566	26.0746	26.5181	27.2203	25.3764	25.776	24.9644	25.1985	26.1475	25.9016	26.0242	27.028	25.1519	26.1507	26.1225	25.8348	24.9561	25.8433	25.5596	25.6279	25.8808	26.4403	25.3196	25.3826	24.6366	25.969	25.0203				3	3	3	40.7	40.7	40.7	16.762	0	323.31	3418800000	114
26.5627	27.806	28.663	27.232	27.3908	27.7496	27.9403	27.8198	27.1247	28.4377	28.0295	28.4225	27.9496	28.2221	29.3376	28.3937	27.6303	27.1359	27.3421	29.2165	28.3208	28.1084	27.1955	27.9244	27.6747	26.6894	28.8705	29.0043	27.0817	29.2098	29.1468	27.2806	28.358	28.1001	27.5472	26.7748				17	17	17	39.8	39.8	39.8	66.408	0	323.31	12645000000	366
26.5556	26.2857	26.4747	25.9798	26.4255	25.5931	23.2545	27.0115	23.9295	25.7337	25.1015	26.0651	26.3779	24.2792	25.9742	25.8364	24.8233	26.6604	26.5188	26.2762	25.1061	26.4162	25.9793	26.3493	25.6712	27.6364	24.7753	25.8511	26.7304	25.8511	26.4462	26.5838	25.1844	26.0245	24.485	24.732				12	12	12	15.8	15.8	15.8	134.43	0	323.31	2707600000	308
28.4464	27.4313	27.2286	27.1764	27.514	28.2914	27.7773	28.6489	28.0145	27.4536	27.634	27.6705	28.2016	27.5424	26.9307	27.5075	26.5011	28.3282	27.1207	28.3186	27.3184	27.56	27.8617	27.9079	27.2829	27.2847	27.4141	27.3053	28.3016	27.2334	27.3466	27.8465	27.2834	27.5345	27.6794	27.6438				16	16	16	49.3	49.3	49.3	56.5	0	323.31	9513600000	666
30.6442	30.3908	30.658	30.7501	30.9385	30.9215	30.1702	30.479	31.2435	30.8836	30.9041	30.7045	30.1409	31.3407	31.1935	30.2289	30.7453	30.5225	30.3204	31.1524	30.606	30.4541	30.55	30.2132	30.9994	30.6681	31.8423	30.7671	30.5114	31.3147	31.2103	30.8439	31.3294	30.6863	30.7783	30.7196				65	65	60	44.5	44.5	42.7	280.01	0	323.31	79157000000	2360
27.6506	26.7457	26.4297	26.4294	26.4089	27.8321	27.722	27.7214	27.238	26.6667	27.0343	27.1319	26.7137	26.9209	26.3335	26.9179	27.1136	26.9607	26.1188	27.2926	27.4473	26.4325	26.6377	26.3847	26.519	26.3998	26.9891	26.5881	27.2536	26.3646	26.8112	26.9032	26.8461	26.5307	26.5855	26.5565				17	17	17	30.7	30.7	30.7	98.398	0	323.31	5421600000	544
25.9998	27.1721	25.2995	25.1971	24.9768	24.1226	26.3659	25.5892	24.929	24.9342	25.2431	24.5122	24.551	24.1815	24.4338	26.0606	25.1375	25.969	24.4983	25.0747	23.8412	23.9163	25.5538	25.1892	23.9875	24.7003	24.8292	25.2912	25.617	23.8596	24.8699	24.3314	24.1395	23.9557	26.597	26.4914				11	11	11	54.4	54.4	54.4	30.772	0	208.5	2028000000	248
25.1308	25.2527	24.4186	24.5873	24.9104	25.4428	25.589	25.0111	25.6142	24.7632	25.7821	25.3033	24.7921	25.6207	23.8991	25.7214	26.1523	24.1858	24.2474	25.1068	25.5045	23.7117	24.7457	24.2106	24.2463	23.0324	25.3041	24.4976	24.8545	24.6201	24.8622	24.31	24.825	25.0941	26.2012	24.5063				9	9	9	63.8	63.8	63.8	24.449	0	284.85	1623100000	156
27.4582	26.8091	26.3106	28.0573	27.389	28.4861	28.3434	28.7234	30.9741	28.9849	29.6383	29.7691	29.0127	31.3555	27.5524	30.2414	29.2295	28.4944	27.8626	28.2792	30.3339	27.5617	27.2735	27.6236	28.5603	25.7761	30.7404	28.1536	27.1142	30.0556	28.9243	26.5093	30.0629	28.1507	29.7954	28.355				26	26	26	59.8	59.8	59.8	77.328	0	323.31	27008000000	709
24.2816	25.4711	25.1363	25.2282	25.2346	25.1481	24.802	24.5647	24.8595	24.9695	24.9007	25.1704	24.9908	24.3115	24.5619	24.7388	24.4791	24.5398	25.4441	24.379	24.6528	24.9398	24.7224	24.8776	24.7698	25.1723	24.1967	25.2823	24.4265	24.9212	24.539	25.0559	24.7668	24.3251	25.1912	24.5219				4	4	4	35.2	35.2	35.2	24.636	0	323.31	1276300000	98
26.3466	26.0739	26.0697	26.2338	26.1283	26.1631	25.355	26.1856	25.2934	26.0649	25.5508	26.0204	25.9738	25.6339	26.221	25.6217	25.8012	25.7392	25.481	26.5922	25.625	26.0175	26.2778	25.9769	26.1264	26.2057	26.3108	25.7452	25.9241	25.7231	25.5852	26.1845	25.7827	26.2641	25.9111	26.511				16	16	16	24.8	24.8	24.8	107.77	0	268.26	2585800000	314
26.1726	26.2056	25.7091	26.5026	26.5567	26.3718	26.0202	25.7482	25.4814	26.5281	26.2265	26.3444	25.8413	25.7342	26.188	25.0337	25.7508	26.3137	26.3794	26.0488	26.1099	26.5871	26.7734	26.143	25.998	26.1885	26.3789	25.842	25.517	25.8169	26.2972	26.6757	25.7413	26.3008	25.969	26.8191				14	14	14	49.6	49.6	49.6	47.079	0	323.31	3078100000	309
30.1469	30.3937	30.0888	29.9871	30.1232	30.5293	29.8961	30.2087	29.9691	30.372	29.9237	30.6868	30.4914	29.7674	30.3242	29.7909	29.5773	30.6028	30.2042	30.0379	30.0869	30.3908	30.5279	29.7353	30.1061	30.5223	30.2782	30.2021	30.4254	30.0068	30.1751	30.6081	29.9424	30.2077	30.1615	30.045				31	31	31	55.4	55.4	55.4	113.8	0	323.31	52646000000	1479
24.1702	24.0551	24.6206	25.5195	24.5612	25.0124	24.723	24.2034	24.7063	24.3085	24.0682	23.9232	23.4037	24.0185	22.4874	24.7085	23.8206	23.9992	24.2979	22.7981	24.9806	24.4841	23.3127	23.0436	23.2843	22.811	23.3507	23.7002	25.0674	25.2834	24.2671	22.6091	25.0674	25.1839	24.3475	21.9609				4	4	4	22.6	22.6	22.6	25.552	0	5.8868	1084900000	106
28.9125	28.8648	27.8489	28.3588	27.4536	28.1543	28.4398	28.9288	28.135	28.2737	28.118	28.1035	28.1413	27.9625	28.3532	28.3506	27.9454	28.1993	28.1059	27.899	28.6248	27.881	28.6653	28.5564	27.8887	27.288	27.9289	28.1026	28.3183	27.7956	27.6834	28.4836	28.2219	27.8999	29.0583	28.2984				9	9	3	52.8	52.8	16.5	30.137	0	109.86	12659000000	326
30.2538	30.4164	31.007	30.8629	29.8063	29.8397	30.2749	29.8824	29.4077	30.3052	29.4582	30.0133	30.2375	29.3587	30.6749	29.2233	29.4894	29.5357	30.4423	30.5009	30.1234	30.0212	30.3946	31.0291	30.2181	29.5664	29.7629	30.617	30.3609	29.5892	29.7938	30.3687	29.3644	29.9194	29.574	28.9253				15	15	15	53.8	53.8	53.8	37.429	0	323.31	51956000000	885
22.7468	23.8288	24.1362	22.2451	23.7676	22.6229	22.5257	22.8153	22.3965	23.7991	22.6942	23.9488	23.3918	22.5272	23.9935	23.579	23.9442	23.4069	23.9271	23.7928	23.4321	24.4717	23.6974	23.1774	24.0444	24.7734	22.8106	23.497	23.1781	23.7926	23.6726	23.4959	23.5382	24.0365	22.6794	22.8726				6	6	2	27.8	27.8	10.7	39.379	0	52.741	508270000	70
26.37	25.5081	26.6007	25.9089	26.2607	26.5484	26.3642	26.7936	25.9262	26.136	26.3159	26.0135	26.5474	26.8165	27.3094	25.945	25.7275	26.5036	25.371	26.7813	26.2604	26.7634	25.8332	26.5086	25.2566	25.9735	26.1318	26.5542	25.4916	26.8197	26.6576	25.3896	26.1392	26.7887	26.1963	25.3557				12	12	12	43.3	43.3	43.3	48.442	0	292.01	3515100000	264
26.5496	26.8472	28.1734	27.3593	26.5008	26.8822	27.1685	26.8418	26.4951	27.6863	27.1959	26.847	26.8527	27.3076	28.2964	26.5079	27.3137	25.8354	27.0721	27.9833	27.2911	27.2003	22.662	27.2228	27.7978	26.2409	27.3621	27.6834	27.0236	27.9478	26.2772	27.6324	27.6304	27.4576	27.4319	26.0799				5	5	5	10.6	10.6	10.6	72.262	0	323.31	6306700000	119
23.7584	23.579	24.3063	23.8534	24.4668	24.2284	24.0044	23.8467	24.2456	24.1139	24.0606	23.8555	24.3431	23.9362	23.7516	23.8331	22.9865	24.5904	23.7002	24.3922	24.2652	23.2447	23.8649	24.1539	24.0108	22.967	24.0352	24.0038	23.8822	23.8995	23.7753	24.192	23.8912	23.6744	24.143	23.9229				11	11	11	44.3	44.3	44.3	51.169	0	51.557	694280000	110
27.2461	26.52	26.6994	27.5592	26.0461	27.3436	28.0775	27.7697	28.1592	27.3167	27.6727	27.0154	27.6121	29.3946	27.5652	26.3758	27.6744	26.7867	26.4956	27.1303	28.1007	26.9751	26.7913	26.7008	27.1956	26.1119	28.9203	26.6248	26.616	28.2405	27.6525	26.6005	28.2897	27.6415	27.8964	25.1366				8	8	8	31.9	31.9	31.9	23.742	0	84.157	7921100000	197
30.4726	27.5134	27.6873	28.9833	28.8552	30.7618	29.3043	31.4561	27.5913	28.125	27.833	28.3201	30.027	27.3745	27.7959	28.0512	27.3948	30.3994	28.0604	29.8001	27.6891	28.1048	29.4148	29.6944	28.0509	28.4247	27.537	28.3848	30.5955	27.3066	27.418	28.9437	27.4156	28.1147	29.1472	28.0344				23	23	23	73.7	73.7	73.7	53.165	0	323.31	24847000000	787
29.2098	29.3804	29.8987	29.737	29.6075	28.9157	29.1783	29.3787	28.9118	29.4147	28.7943	29.1697	29.5015	29.3727	29.7356	28.3808	28.3756	29.2526	29.9212	29.628	28.6154	29.7503	29.4227	29.7301	29.6113	29.5197	29.1123	29.5615	29.2169	29.1033	29.3934	30.0279	28.9618	29.5904	28.9152	29.4761				11	11	11	55.1	55.1	55.1	26.688	0	323.31	29453000000	464
21.669	23.2914	23.4037	24.4065	23.4005	24.8391	24.483	24.5271	23.7595	22.884	24.1845	23.2412	23.4013	24.2675	23.7298	23.8418	22.0255	24.3382	21.2314	24.4874	23.6305	23.5645	23.0966	23.8839	23.1039	21.9418	23.8882	23.4475	23.5713	23.1857	23.7573	23.4819	22.7189	23.4244	24.9741	22.4042				8	8	8	16.1	16.1	16.1	71.381	0	96.414	543870000	149
22.988	23.6596	24.9727	23.7837	23.1537	24.6713	24.1641	23.6469	23.8812	24.0279	23.8838	23.814	24.1565	23.4633	24.2641	23.335	24.733	24.0123	24.2091	22.9772	23.7025	24.5659	24.0174	24.0182	23.7775	23.8252	20.2396	23.5578	23.6132	23.6327	24.2136	24.2841	23.7443	24.2434	24.0097	23.0752				3	3	2	8.1	8.1	5.6	50.031	0	73.136	651130000	79
32.2642	30.8703	30.3635	31.2502	30.8576	30.2365	30.0111	31.4928	30.2733	31.098	30.4866	30.2958	30.9036	30.7162	31.2734	30.2914	29.951	30.8945	31.1303	30.996	30.3292	30.8415	31.021	30.9345	31.2976	31.5717	30.263	31.0244	31.6957	30.3797	30.3534	31.1917	30.1476	31.2751	30.8155	30.7184				10	10	7	59.6	59.6	42.8	18.502	0	323.31	94319000000	1085
24.9843	23.9997	25.7592	25.1623	24.2728	25.2955	24.998	25.2066	24.7106	25.5636	24.9772	24.901	26.0928	24.5614	25.7256	23.3897	24.4542	24.0876	25.2792	25.6148	26.6132	24.8934	25.2279	25.2891	25.3522	25.678	25.5015	25.636	25.5579	25.244	25.4544	25.8017	25.1578	25.6291	25.1649	24.7884				7	7	7	17.2	17.2	17.2	69.15	0	209.29	1563600000	125
25.759	26.1913	25.5252	25.746	25.4431	20.7188	25.138	25.0829	21.3461	26.1163	24.7059	26.524	24.3819	25.0359	26.127	26.3151	24.6041	25.3015	25.9893	25.4016	24.7189	26.009	25.8493	25.6712	26.1232	25.9924	24.8956	25.9635	26.0927	25.8533	26.0852	26.3016	25.5215	26.4292	22.9973	24.5038				14	14	14	27.8	27.8	27.8	82.629	0	323.31	2191700000	252
26.7173	26.5914	25.3773	26.4124	25.8996	25.7705	26.5325	26.3114	25.7785	26.2794	25.7138	26.2446	26.917	26.3623	26.7945	25.296	25.1144	25.8666	26.259	26.1091	24.1993	25.6701	26.5888	26.1268	25.5466	25.1624	26.0994	26.1172	26.4627	25.9631	25.8357	26.5228	26.5161	26.2579	26.182	26.325				4	4	4	34.7	34.7	34.7	24.763	0	323.31	3041600000	106
26.3697	27.1335	27.031	26.8154	26.3694	25.6604	26.2403	26.153	26.246	26.2104	25.7167	26.2788	25.9224	26.1883	26.3245	25.7545	25.7248	26.3539	26.8132	26.1621	25.9104	26.5401	26.3502	26.9233	26.0916	26.3021	25.7107	26.4933	26.6373	25.8871	25.8861	26.3258	25.901	26.2961	25.9648	26.2644				7	7	2	65.8	65.8	19	18.042	0	322.31	3152700000	200
24.4387	24.5284	25.7867	23.9725	23.1149	25.6356	25.6431	25.5848	24.6431	25.2433	25.5371	24.6464	26.0385	26.075	26.315	25.2019	24.987	24.393	24.0536	25.8185	24.8393	24.9703	24.5711	24.9213	24.2488	24.0283	25.9046	25.7385	23.6664	26.0441	25.768	24.2617	25.8228	24.9642	25.1939	23.9631				6	6	6	24.8	24.8	24.8	45.199	0	323.31	1839100000	175
28.3547	28.4972	28.7224	28.7818	28.6429	30.1034	28.8755	28.6051	30.0389	30.0668	30.7586	29.4663	29.7065	30.4049	29.8108	30.0947	30.3641	28.5327	28.6194	30.2458	29.4081	28.2944	28.3636	28.0895	29.2445	27.7308	31.7126	29.6737	27.1646	31.6422	30.2937	26.791	31.5651	28.2507	30.7064	29.6575				55	55	2	42.2	42.2	1.8	240.85	0	323.31	48079000000	1755
24.8911	25.677	25.158	26.1088	25.6801	24.9668	24.9833	24.9041	22.7682	25.5661	24.5789	25.4823	24.5426	23.9082	25.0602	24.6184	24.3719	25.3499	25.6876	25.1719	24.714	25.5869	26.1469	25.4602	25.0122	25.3662	24.8131	24.872	25.004	24.9104	24.7922	25.5683	24.8019	25.3027	25.6139	25.6752				12	12	12	23.6	23.6	23.6	90.98	0	166.72	1490500000	251
24.246	23.9581	23.9396	24.8754	24.1893	24.3406	24.1889	23.8985	25.1647	24.2155	24.754	24.8126	24.3461	24.6892	24.6406	26.0907	24.8424	24.4507	24.3602	24.1007	24.6502	24.727	24.1181	23.9853	24.3452	23.8334	24.2917	24.0965	24.5943	24.3476	24.2966	23.9452	24.987	24.5264	23.7139	24.3464				5	5	5	27.3	27.3	27.3	33.178	0	65.114	1131500000	170
29.9874	29.4663	29.1345	30.1294	29.6126	29.374	29.4023	28.6316	29.1767	28.8746	29.3169	28.7615	29.7352	29.9259	29.671	28.4486	28.4661	29.5668	29.4189	28.9087	29.5761	29.4786	29.6638	29.6513	28.8069	28.9007	29.0502	29.5067	29.0692	29.0447	28.781	29.8085	29.1082	29.5429	29.0743	29.2422				6	6	6	62.1	62.1	62.1	14.515	0	323.31	36776000000	316
23.6229	23.59	24.2942	23.9094	23.8257	23.6172	24.131	23.5369	23.2987	23.9466	23.4713	23.8818	24.2857	23.7589	24.2127	23.7659	23.5879	24.2137	24.1937	24.4268	23.901	23.7652	24.1669	24.1061	24.0984	24.4721	23.8545	24.088	23.9561	24.037	25.0543	24.0964	23.8811	23.9429	23.735	24.0766				6	6	5	22.9	22.9	19.4	38.044	0	97.522	665340000	170
29.3465	29.8583	30.3624	29.5678	30.1875	30.2993	30.2527	30.1986	29.8465	29.6233	30.1763	29.6611	30.5111	30.3265	30.2075	29.7258	30.2503	30.2675	29.5688	30.4204	29.7541	30.2483	29.4509	29.8498	29.774	29.4364	30.248	30.2833	29.1221	30.4311	30.2286	29.1536	29.9795	29.7534	29.8383	29.7785				19	19	19	44.7	44.7	44.7	59.75	0	323.31	48667000000	1181
28.7799	27.9682	27.6824	28.0913	27.9101	28.1882	28.2748	28.6682	27.6524	28.0559	27.4364	27.8532	27.6535	27.6484	27.8045	27.3152	27.2732	28.138	28.4395	27.9395	27.0138	28.543	28.722	27.9612	28.5307	28.4962	27.0919	28.0453	28.6785	27.3577	27.629	28.4184	27.5438	27.697	28.1527	28.4068				9	9	9	54.4	54.4	54.4	29.555	0	146.09	11114000000	313
27.7925	27.0585	27.0605	26.4496	26.7913	27.2302	26.4669	28.003	26.971	27.0657	26.6845	26.8895	27.2743	26.1506	26.8513	26.3655	27.4411	27.1688	26.6913	27.2103	26.5911	26.8638	27.0209	27.7523	27.5491	27.3022	26.3111	26.9591	27.3523	26.1157	26.0761	27.0261	26.4165	26.8371	27.7377	26.9949				7	7	7	41.5	41.5	41.5	25.898	0	277.82	6155300000	384
27.6347	26.6935	26.3765	26.9664	27.3392	26.8022	27.013	27.2205	26.5322	26.3054	26.0312	26.0412	26.4857	26.0913	26.0751	25.8949	25.764	27.6508	26.9308	26.3452	26.7397	27.0478	26.9947	26.7425	27.2343	27.6129	25.5456	26.4123	27.3917	25.4131	25.9321	26.7291	25.5908	26.9095	26.9192	26.5553				5	5	5	24.6	24.6	24.6	27.647	0	183.25	5176300000	240
26.4331	26.0243	24.3936	26.3551	26.355	26.1214	25.4668	26.4701	25.3865	25.8994	25.4998	25.7848	25.987	25.0412	25.4453	25.9088	25.6537	26.0561	26.0158	25.7003	25.6603	26.082	26.1992	26.1301	25.7473	26.0983	25.5334	25.686	25.9394	25.1551	25.5319	26.0691	25.5068	25.6164	25.6118	25.2602				6	6	6	46.4	46.4	46.4	29.483	0	110.29	2510900000	168
29.8767	29.4933	30.1719	29.7314	29.6697	29.8398	29.2543	29.934	29.5001	30.1304	29.5923	29.9256	29.9212	29.5389	30.2286	29.3911	29.1481	29.5048	29.8434	29.9146	29.2697	29.8778	30.0453	29.6269	30.0488	30.3376	30.2152	29.8933	29.8383	29.6856	30.003	30.0037	29.5412	29.9033	29.5481	29.9241				21	21	14	37.3	37.3	25.5	67.819	0	323.31	41130000000	1407
25.1668	25.3811	26.2113	25.69	26.0515	25.401	24.0732	25.6171	24.7346	26.2493	25.4631	26.4654	25.3475	25.5283	26.153	25.5403	24.7219	25.8216	25.2651	26.0441	25.8819	25.858	26.6976	26.1443	25.5389	25.0854	26.2452	26.1715	25.8785	26.3346	26.3795	26.1653	26.0254	25.779	25.4709	24.2618				12	12	12	44.8	44.8	44.8	53.12	0	253.79	2608300000	288
27.6334	27.9682	29.0596	28.454	28.5763	28.1639	28.0059	28.1957	27.1614	28.3201	27.4406	27.8217	28.0813	28.4204	29.0471	27.1165	27.3402	28.0033	28.8446	28.6431	27.9946	28.693	28.2547	28.8198	28.3148	28.4069	28.1431	28.7346	28.1584	28.0795	28.612	28.5892	27.6687	28.4651	27.0763	28.1336				4	4	4	19	19	19	24.261	0	323.31	14715000000	172
29.2853	26.7468	29.0034	29.7237	29.6046	28.3167	29.1383	28.9006	28.8673	28.5336	28.798	28.7213	28.4699	29.3923	28.9352	28.4071	28.259	28.7031	28.4044	27.5917	28.2082	28.7547	28.1789	29.4358	28.3827	27.813	28.0428	28.5792	29.5685	27.6339	28.5179	29.0301	28.249	28.9329	26.9268	27.9054				4	4	4	54.5	54.5	54.5	11.728	0	26.518	16903000000	130
28.3553	28.7177	28.9115	28.2718	28.5175	28.2083	28.1032	28.4868	28.0727	28.7738	28.1968	28.7641	28.3547	28.1702	29.2405	28.419	27.8759	27.646	28.0731	28.7996	28.9473	28.6526	28.5561	28.5651	28.6082	28.0226	28.6667	28.9426	28.7178	28.5732	28.4527	29.1378	28.3628	28.7536	28.4387	27.7624				13	13	12	45.6	45.6	44.1	57.221	0	323.31	17822000000	741
25.8957	25.6083	25.8488	26.3531	25.7867	26.4317	25.7103	25.8088	26.2558	26.2569	26.0654	26.2591	26.1708	25.896	26.1297	25.1829	25.3298	26.2185	25.9306	25.9949	25.5173	25.8183	26.2074	25.7643	26.0642	26.1463	26.1326	25.9997	26.0359	25.9301	25.9393	26.564	25.8139	26.2609	26.3439	26.3054				15	15	14	28.6	28.6	27.5	83.434	0	183.76	2623400000	318
26.5066	26.8152	27.2522	27.2597	27.3013	26.9168	26.7035	26.454	26.5413	26.9643	26.9623	27.2238	26.9311	26.3654	27.1637	26.5825	26.7079	26.6239	27.6369	27.2566	27.4802	27.3674	26.8521	26.8324	27.2862	27.8237	27.2745	27.1074	26.6983	27.3665	27.3959	27.5519	27.0762	27.33	26.413	27.0512				20	20	20	28.4	28.4	28.4	140.47	0	323.31	5656400000	398
27.6587	27.7799	27.5953	27.9857	27.233	27.8633	27.5128	27.6728	27.6362	28.0474	27.7615	27.8006	28.1309	27.4374	27.7398	27.3121	27.3229	27.6715	27.8802	27.7734	27.2674	27.0225	27.9859	28.0014	27.6345	28.1685	28.2486	27.7381	27.6118	27.6514	27.6169	27.8006	27.7466	27.9673	27.0712	28.3253				18	18	18	57.9	57.9	57.9	50.118	0	323.31	9771400000	361
26.9317	24.9219	26.3429	26.3137	25.9514	27.5796	27.9294	27.9222	27.2864	25.6806	26.509	26.4383	26.9496	26.4201	26.2392	25.4557	25.9461	27.0025	26.1362	27.3643	24.7894	26.3414	26.427	25.8422	26.1956	26.2291	26.8658	26.2602	27.1862	25.8354	26.7874	26.1571	26.3597	26.26	25.1129	27.8901				6	6	6	33.7	33.7	33.7	31.73	0	323.31	4485700000	217
27.7206	27.7433	25.7499	27.411	26.7549	26.819	25.7037	27.6588	27.0118	27.6183	27.5903	27.9887	26.8812	26.7225	26.4831	28.5896	27.5026	26.7624	26.9478	26.5624	26.7334	27.0941	27.9562	26.3534	26.734	27.412	27.3605	26.9371	27.8352	26.5431	27.0247	27.1424	26.6764	27.3847	28.4159	28.0329				13	9	9	59.6	49.8	49.8	27.764	0	323.31	8737400000	369
26.572	26.6168	26.7566	26.9395	27.5107	26.5638	26.3295	26.8369	26.0746	27.0785	26.2645	26.6665	27.262	25.9986	26.9697	25.2518	26.2111	26.8775	27.1662	26.8954	26.2314	26.6886	27.0395	27.5579	26.8292	26.5353	26.8526	27.3876	26.3288	26.9429	26.4274	27.5901	26.5104	26.8758	26.5825	26.1736				4	4	4	24.3	24.3	24.3	24.604	0	279.49	5733900000	216
22.4088	23.7663	24.5207	23.9233	24.3344	23.5847	23.3687	24.2751	23.4669	24.6454	23.2867	24.3785	24.0108	22.2984	25.1325	24.4293	23.912	23.8594	24.1516	25.104	23.5716	24.1917	24.2297	23.1847	24.6577	24.6079	24.3836	24.7556	24.3125	24.7708	24.7668	25.0851	23.8334	22.9354	23.7564	22.7591				13	13	13	34.6	34.6	34.6	68.137	0	168.05	869880000	182
25.1637	25.8606	26.6709	25.5242	25.5383	26.5929	24.7539	26.1347	24.9787	26.0868	26.1483	25.7029	26.3177	25.6655	27.0852	26.4687	26.7953	25.0167	26.0914	26.6786	26.1135	26.2915	25.6957	25.1929	23.3009	25.3627	26.2771	26.2856	25.1446	26.5642	25.9855	26.2088	26.4051	25.5468	26.5714	24.8396				9	9	9	39.9	39.9	39.9	35.554	0	123.98	3215700000	195
25.7138	26.375	26.0637	26.2214	26.7521	26.2588	25.5	25.6826	25.5935	25.9153	25.4718	26.4662	25.355	25.5329	25.6205	25.8577	26.3239	26.2532	26.2202	26.1185	25.9958	26.1869	26.3889	26.0875	26.4601	26.7543	25.9194	25.9118	25.6001	25.931	25.9752	26.2787	25.7447	26.2897	25.8832	27.3193				29	29	29	21.3	21.3	21.3	242.98	0	323.31	3118000000	462
28.5399	26.73	26.1474	28.1179	26.9787	27.9468	28.6014	28.1843	28.4975	27.6966	28.3474	27.7441	27.901	28.4861	27.5665	27.1355	26.8412	27.6212	26.9304	28.2118	27.7541	26.84	27.8671	27.506	27.3265	26.6726	28.366	27.4515	28.3416	27.8292	27.6481	27.5448	28.061	27.7818	28.1	28.115				11	11	11	48.4	48.4	48.4	48.141	0	323.31	12506000000	632
28.6878	27.4357	27.1154	27.5986	28.6178	28.1613	27.365	27.7621	27.9087	27.694	27.775	27.6683	27.4565	27.6784	27.5672	27.395	27.4105	28.168	27.7582	27.0903	27.7199	28.0348	27.6939	27.3995	27.923	28.2794	27.5186	27.1539	28.0567	26.992	27.545	27.9589	27.7599	28.0591	27.9773	28.4777				21	21	21	31.9	31.9	31.9	121	0	323.31	9390900000	404
26.7119	25.2453	27.2593	27.0085	26.5567	27.7844	27.6891	27.3456	27.4495	27.0668	27.6596	27.1534	27.1259	27.5962	26.9928	27.3615	26.989	26.8657	26.3235	27.5548	27.1784	26.7409	26.83	26.453	26.8899	25.7994	28.2933	27.2453	27.1909	27.4975	27.7887	26.6185	27.4159	26.914	27.4505	27.238				10	10	10	27.9	27.9	27.9	71.502	0	323.31	6948200000	380
23.7099	22.4434	24.3859	23.1095	24.3987	23.7548	23.6009	23.322	23.4357	23.4712	22.6677	24.1717	24.0194	23.2348	23.6647	23.6197	23.9144	22.9283	24.2227	24.4534	23.459	24.4371	23.3098	23.5806	24.234	25.2971	23.8144	23.669	23.9975	23.3928	23.4777	23.9445	23.1429	24.2555	23.7827	24.1585				8	8	7	17.8	17.8	16.3	83.597	0	14.781	576360000	87
29.9073	29.1298	28.072	28.4003	29.6538	28.7756	28.8601	29.1283	28.2227	28.6256	28.2652	28.1024	28.6335	27.6894	27.6183	28.4655	26.689	29.6877	29.3954	28.3492	27.8971	29.0001	28.8322	29.4586	29.3763	29.956	26.3853	28.7106	29.8428	27.1022	27.264	28.7628	27.492	28.8274	29.0359	29.6276				6	6	6	34.9	34.9	34.9	22.328	0	323.31	22128000000	449
28.5366	27.0016	27.0242	27.722	28.0097	27.2093	27.529	28.1682	27.222	27.2663	26.6477	27.1059	27.5525	26.5042	26.9404	27.3106	26.5865	27.6632	27.9902	27.0388	27.4554	27.185	27.7033	27.5973	27.6824	28.0739	26.242	27.2052	28.3299	26.3496	26.4747	27.4473	26.9028	27.6774	28.2175	27.0605				6	6	6	44	44	44	26.411	0	275.85	8459000000	294
27.8575	26.9731	27.1168	26.7025	27.751	27.1632	27.3451	27.7533	26.7565	27.4361	26.9425	27.1192	27.715	26.1608	26.8593	26.8424	26.2861	27.6771	27.5083	26.8305	27.5476	27.083	27.4428	27.722	27.6146	27.3345	26.3339	27.1678	27.5644	26.1619	26.408	27.4788	26.768	27.1098	27.8763	27.1101				6	6	6	41.7	41.7	41.7	29.204	0	323.31	8772700000	537
25.2006	24.668	26.4902	25.2109	24.2084	26.0638	25.4603	25.6276	24.8438	25.7992	25.7677	25.358	26.2404	26.2013	26.5561	25.7165	26.2633	24.7569	24.5577	26.5232	25.5979	25.2964	24.1082	24.1491	24.4487	22.817	26.3729	26.5163	24.2777	26.9369	26.6676	25.1764	26.1681	25.7317	25.4237	23.504				12	12	12	32.3	32.3	32.3	67.524	0	323.31	2354900000	260
27.0948	26.5003	26.5958	26.5633	26.5745	26.4192	26.3125	26.9698	26.6516	26.8071	26.7729	26.9071	26.9129	26.5657	26.6497	26.2187	26.2586	26.9218	26.7794	26.546	26.1802	25.9894	26.8986	27.0996	26.4589	26.7786	26.8758	26.9375	27.0351	26.5431	26.4975	27.0856	26.8125	26.3048	27.6398	26.3941				13	13	12	51.9	51.9	47.8	41.389	0	157.53	5052100000	275
26.4825	26.2379	27.2661	27.4077	26.6146	26.6786	27.7286	25.5341	27.5736	26.0539	26.8295	26.9041	26.914	26.9339	26.2106	25.7823	25.7889	25.6788	26.4183	25.541	25.9858	25.8737	26.0801	27.0072	26.2837	25.3557	25.9552	26.2419	25.5922	25.2518	25.7829	26.5757	26.2391	25.4996	26.8284	27.9222				8	8	8	36.9	36.9	36.9	24.01	0	150.45	3883600000	192
29.9443	29.0251	28.5885	29.4376	29.1191	30.5423	29.9041	30.89	28.5296	29.1615	28.7185	29.4609	30.2554	28.9598	28.973	28.9441	27.8911	30.6738	29.0279	29.9955	28.5026	28.6892	29.5482	29.3483	28.7562	28.5574	28.7313	29.073	30.1012	28.7658	28.736	29.3069	28.5291	29.1345	29.5763	28.2242				20	20	20	62.1	62.1	62.1	52.771	0	323.31	31029000000	854
25.8173	25.397	25.0296	25.5246	25.9234	24.6171	25.3436	25.2497	25.5403	25.3955	24.9661	25.4374	25.3777	25.8327	25.3314	24.8188	24.086	25.5907	25.8872	25.4027	25.5291	25.7764	25.6152	25.1856	25.6144	26.5076	25.6112	25.244	25.4884	25.363	25.625	25.5962	25.2042	25.4572	24.9495	25.824				11	11	11	16.1	16.1	16.1	138.35	0	323.31	1740900000	213
26.8298	26.2477	26.4169	26.2612	26.5909	26.2289	25.8257	26.6878	25.7245	26.5993	25.8574	26.5275	26.2141	25.1963	26.3889	25.5873	25.3567	26.8586	26.8394	25.7772	25.168	27.2246	26.7674	26.6006	26.5476	27.3208	25.3763	26.4341	26.9466	25.9141	26.216	26.8894	25.5393	26.8021	25.5163	26.1324				7	7	7	31	31	31	30.188	0	210.43	3507400000	217
26.8868	28.3637	28.5075	27.5535	27.8235	27.1979	26.9614	27.8215	26.7235	27.8178	26.7083	26.9969	28.3319	26.6831	28.1705	27.6216	27.9163	27.5771	28.502	27.8555	27.5329	28.0808	27.6074	27.9173	28.1163	28.585	26.8162	28.1369	27.436	27.6308	27.2335	28.4623	27.0886	27.5757	26.9499	27.2592				18	18	18	47.1	47.1	47.1	67.56	0	323.31	9599400000	534
29.4571	29.2689	28.9901	29.4775	29.3016	29.6067	29.3337	29.6605	29.7817	29.2499	29.2842	29.826	29.7739	29.7532	29.7063	29.2549	29.1454	29.7137	29.251	29.5451	29.214	29.0357	29.6037	29.0659	29.3895	29.0945	29.4905	29.3311	29.4582	29.1616	29.5581	29.8165	29.3216	29.2948	29.4189	29.1151				18	18	18	50.7	50.7	50.7	67.877	0	323.31	33647000000	876
25.5335	25.2258	25.498	25.36	25.3904	25.1555	25.0613	24.5006	24.8704	24.6758	24.8959	24.9949	26.6308	24.285	24.5651	23.9996	24.5764	26.329	25.3235	25.8714	24.9361	25.4011	25.2734	26.2204	24.9676	25.0912	24.4995	25.4869	25.4537	24.6617	24.5864	25.5637	24.1561	25.1358	24.8459	24.7272				10	10	10	36.3	36.3	36.3	42.888	0	45.335	1613900000	99
25.6661	26.4018	26.8977	26.6737	26.4235	26.5905	26.6687	26.7314	26.5557	26.4951	26.3205	26.4178	26.6649	26.5689	26.134	26.8379	26.1256	27.4458	26.9699	26.5171	25.9999	26.3882	26.9568	26.8395	27.1566	27.0036	26.3733	26.6788	27.3399	25.7683	26.5566	26.5221	26.0093	26.6108	24.9011	26.3284				17	17	6	32	32	12.1	97.55	0	70.24	4006100000	182
28.1064	29.7492	28.5354	29.223	28.7234	28.1049	27.731	27.6442	28.0277	28.3787	27.9108	28.3273	27.9803	27.9436	28.1027	29.1816	28.062	28.3408	29.0576	27.8369	27.8013	28.0661	28.5118	28.7805	27.9657	28.4625	28.2087	27.6587	28.4377	28.3665	28.2473	29.0305	28.0885	28.0787	28.0844	28.5237				8	8	8	42	42	42	31.121	0	323.31	15343000000	193
26.4622	24.4406	25.5532	25.6068	24.7839	26.108	26.1957	26.3034	25.6628	25.4777	25.7353	25.5083	25.5156	26.0506	26.3716	25.1798	25.9182	25.8255	25.1698	25.6025	25.7818	25.148	25.4539	25.5139	25.3605	25.4877	25.6713	25.8332	25.8066	25.3876	25.7352	25.8056	25.3103	26.0057	25.777	25.9805				8	8	8	43.3	43.3	43.3	28.993	0	287.25	2558600000	192
29.1102	29.071	27.9269	28.4556	28.473	28.4971	28.141	28.6138	28.8191	28.4364	28.3676	28.5076	28.5891	28.5906	28.2351	27.9481	28.8937	28.6398	28.2971	27.8262	27.7965	28.7626	28.5954	28.5197	28.1756	28.5248	28.2389	28.9122	28.5872	28.2036	27.8702	28.5783	28.5354	27.9817	28.8252	28.8196				13	13	13	66.1	66.1	66.1	25.035	0	323.31	16845000000	599
26.5212	26.0106	26.3844	27.0889	26.4196	28.0114	28.8077	27.294	27.5844	26.3611	27.4825	26.2293	28.2201	28.1693	26.3895	26.7305	27.3663	27.0077	26.3712	26.5443	26.8504	26.3126	26.3632	26.767	26.7743	26.5737	26.345	27.3002	27.3853	26.6534	26.0293	26.2831	26.1573	26.3915	27.7992	26.4143				6	6	6	59.7	59.7	59.7	22.119	0	323.31	6165700000	315
28.7341	28.8902	28.9039	28.9638	28.5282	29.0353	28.7832	28.5715	29.114	28.648	28.8521	28.5102	28.9702	28.5304	28.5542	28.2335	28.3922	29.143	28.8655	28.0566	28.8921	28.9325	28.6748	28.915	28.4589	28.5318	28.3894	28.9344	28.9196	28.4192	28.3926	28.8875	28.8034	28.7208	28.5206	29.0133				9	9	9	73.5	73.5	73.5	17.031	0	323.31	20326000000	579
28.3148	27.8323	26.9404	28.0007	27.7436	27.2773	27.5306	25.7553	27.6264	26.9863	26.271	26.9642	27.5177	27.5917	26.9094	26.9472	26.9641	27.8861	26.9503	26.3873	27.4644	27.9916	27.2806	27.7918	27.2056	27.0825	25.547	28.0041	28.143	26.3537	26.5138	27.5298	26.2763	27.2462	27.407	27.3564				5	5	5	37.3	37.3	37.3	12.712	0	142.38	6845600000	195
27.8179	26.1772	27.1019	27.3266	26.4372	27.5144	27.6773	27.3525	26.7743	26.6895	27.0007	26.8099	27.2272	27.0637	27.0912	26.966	25.3192	26.8477	26.465	27.2533	26.2801	26.5274	26.7958	26.7099	26.1272	25.5925	26.9466	26.9272	26.8681	26.9121	26.9352	26.687	26.3293	26.6572	27.2641	26.1431				6	6	6	44.5	44.5	44.5	25.838	0	291.92	5012600000	248
29.6178	29.2442	29.0012	29.2908	29.379	28.674	28.805	28.9465	28.9179	28.6105	28.4772	28.2952	29.2111	29.1387	28.7994	27.9819	28.1862	29.3147	29.3997	28.6878	28.2441	29.4347	29.0197	29.3082	29.0467	28.5605	28.0805	28.9799	29.0171	27.8053	28.4285	28.6725	28.3713	28.8541	28.9467	29.136				6	6	6	45.5	45.5	45.5	17.818	0	323.31	19614000000	332
25.9888	26.2323	25.9588	26.4269	26.186	26.2901	26.4178	26.4137	26.1639	26.2597	26.2774	26.9845	26.2757	26.6937	25.8704	25.3411	25.3722	26.0785	26.1563	25.8651	26.6323	26.4688	25.9232	26.2977	26.355	26.6914	26.2471	26.2421	25.615	25.9327	26.2215	26.4155	25.9733	26.0897	25.9943	27.0025				7	7	7	36	36	36	25.855	0	323.31	3131700000	178
28.4238	27.9581	27.8541	28.3134	27.4053	27.7253	28.198	28.4483	27.2877	28.5608	28.1644	27.9937	27.6403	27.4204	28.3251	27.2084	26.8373	28.4468	28.6166	27.8269	27.6217	28.13	28.5724	28.4304	28.003	28.1558	27.2733	28.5459	28.1518	28.1009	27.9407	28.7513	27.8866	28.2196	27.1568	26.6693				8	8	8	66.3	66.3	66.3	21.057	0	323.31	11096000000	301
28.8472	28.3643	28.471	28.3219	28.0115	29.3899	29.1355	29.6843	29.6821	28.5538	29.2038	28.8554	29.4243	30.0359	29.1015	29.1767	28.542	28.5076	28.1291	29.3263	28.6734	28.4454	28.5555	28.0175	28.6722	28.3428	29.939	28.7832	29.0427	28.8851	28.9527	28.348	29.2491	28.5595	29.7253	28.7837				13	13	13	29.5	29.5	29.5	56.782	0	323.31	23656000000	792
27.997	27.9744	27.864	27.7453	28.0174	27.6191	27.718	27.8425	27.4226	27.9022	27.5538	27.9922	27.7269	27.254	27.7349	26.9444	27.1979	27.8221	27.8773	27.7686	27.3689	28.1336	28.0196	27.795	28.0613	28.538	27.6651	27.7259	27.9276	27.6417	27.5237	28.2324	27.7434	28.3622	27.592	28.1116				17	17	12	45.8	45.8	31.9	65.308	0	323.31	11053000000	657
24.6433	25.6411	24.9219	25.8857	25.4385	24.8916	24.7314	25.2604	25.0529	25.372	24.48	25.7757	24.8631	23.8147	25.0068	24.8563	24.9695	25.0493	25.0089	24.9335	25.54	25.1485	25.7049	25.8374	25.0987	25.0501	24.9894	24.875	25.4249	24.4259	24.8921	25.7476	24.7044	25.0908	25.2107	24.9247				9	9	8	27.6	27.6	26.1	50.097	0	191.94	1567000000	180
26.3389	25.7168	25.6639	27.4324	26.2218	25.8202	26.4702	26.7554	26.0759	26.2278	26.2003	26.1277	26.0499	26.5728	26.1234	25.3649	25.184	26.3391	26.9395	25.3819	26.7822	26.4837	27.0152	26.8021	25.4007	24.5277	25.6303	26.1755	25.4674	26.3386	26.2871	25.4024	25.9271	26.4123	25.3427	25.1689				9	9	9	47	47	47	21.676	0	323.31	3150700000	151
28.7732	27.3217	27.453	28.439	27.7316	28.4037	28.3067	28.7982	29.0111	27.9499	28.043	28.0984	28.7303	28.0871	28.0549	27.7057	27.1448	28.3097	27.857	28.3547	27.8292	27.8437	28.3021	27.766	28.0668	28.0565	28.0641	28.0672	28.9076	27.8872	27.7679	28.2257	28.0612	28.2359	28.7717	29.6646				12	11	11	43.5	40.9	40.9	42.741	0	323.31	13125000000	425
24.0019	24.7146	25.7791	24.0549	24.3895	25.2607	24.737	25.0293	24.4002	25.0572	25.423	25.1818	24.9951	24.6475	25.4836	25.2753	25.8844	24.8126	24.7662	25.9597	25.1434	24.897	24.1469	24.777	24.7124	24.4406	24.9172	25.5448	24.0759	25.534	24.5083	23.7843	24.8102	24.9625	25.2352	22.9172				9	9	9	31	31	31	72.691	0	314.52	1481300000	173
30.7087	30.7406	31.0712	30.5253	30.106	29.4323	29.6819	31.0258	30.016	31.2612	30.2728	30.5932	31.0723	29.8294	31.7133	30.4639	30.1135	30.2774	31.0476	30.8471	30.4971	31.4331	30.633	31.0215	31.0913	31.709	29.978	31.2045	31.1585	30.4965	30.2186	31.307	30.3062	31.367	30.3495	30.1918				14	14	14	43.6	43.6	43.6	51.026	0	323.31	77544000000	1542
26.8608	26.3613	26.1818	26.5637	26.4246	26.4103	26.313	26.511	26.1733	26.4241	26.4669	26.7436	26.3325	26.1337	26.6357	25.9063	25.6018	26.7321	26.7939	26.0094	25.6617	26.1613	26.8167	25.8456	26.254	26.8852	26.2256	26.4411	27.0514	26.3657	26.2253	26.9291	26.1812	26.3678	26.5529	27.0298				17	9	9	52.8	33.1	33.1	50.582	0	323.31	4077600000	254
25.7442	25.8198	25.6122	26.5103	25.9285	26.331	26.0214	26.3377	25.361	26.1476	25.1404	26.1148	25.9228	25.8242	25.0251	25.1163	24.6984	26.6136	25.8347	25.9358	25.3512	26.2384	26.5806	25.9144	25.776	25.5273	25.994	25.6451	26.4722	25.7037	25.901	26.4284	25.5698	25.8267	25.5722	25.9686				7	7	7	23.5	23.5	23.5	43.66	0	81.254	2510300000	111
24.6743	23.897	23.6035	23.6711	24.6746	25.0174	24.6537	23.4512	22.6192	23.2094	22.9943	23.3914	22.9614	23.038	23.7916	22.6456	23.0084	24.8371	23.7634	23.7492	23.3894	24.5126	23.41	24.0973	22.7306	23.2604	22.8544	23.276	24.2115	24.1999	23.3748	22.9762	23.2902	23.9085	23.6067	23.6925				7	5	5	28.9	22	22	46.302	0	105.48	573140000	86
23.5403	24.7464	24.1063	24.5404	25.1607	24.3582	24.5546	24.9745	24.1024	24.6906	24.2944	24.9862	25.0066	24.2879	23.4715	23.7384	23.9368	24.421	24.4744	24.8394	23.4749	24.6169	25.116	24.0379	24.344	24.4418	25.2021	24.2508	24.0246	24.3975	24.842	24.8346	24.8761	24.3536	26.0655	24.6231				5	5	5	23.9	23.9	23.9	44.868	0	203.06	1101900000	129
27.6383	27.7776	28.035	27.9207	27.8894	27.363	27.4313	27.4376	27.0322	27.869	27.244	27.988	27.2025	26.4378	27.939	27.1857	27.2862	27.5084	28.2035	27.8131	27.5683	27.9573	28.1862	27.5683	27.8222	28.1626	27.466	27.9392	27.5293	27.381	27.6288	28.2052	27.2829	27.8693	27.3614	28.1711				25	25	25	58.3	58.3	58.3	64.615	0	323.31	9508400000	704
27.8403	27.5416	28.0505	28.0072	27.5606	27.4167	27.9935	27.3271	27.6847	27.6832	26.7544	27.4285	27.0813	26.9082	27.3167	27.2376	26.6764	27.409	28.0991	27.3204	27.5098	27.7295	27.842	27.6905	27.5828	27.581	26.6508	28.1269	27.7687	27.1649	26.941	27.9335	26.9159	27.3503	28.1385	27.7471				4	4	4	25.6	25.6	25.6	31.525	0	293.06	7928800000	211
28.2596	28.8078	28.7069	29.0973	28.3339	28.336	28.3763	28.1653	27.6744	28.4272	27.9006	28.5555	27.8413	28.0926	29.0404	27.8067	27.9392	28.0663	28.9241	28.8196	28.265	28.3502	28.4361	29.1453	28.6666	28.2828	28.2804	28.4732	28.5193	28.3716	28.4515	28.9426	28.3029	28.5704	28.333	27.7983				11	11	8	38.1	38.1	27.6	49.229	0	323.31	15372000000	624
29.2428	30.0761	28.2841	28.3084	28.1153	28.1472	28.3592	29.2852	28.3507	28.7101	28.5611	28.4883	28.8557	27.9444	28.4875	30.317	29.0138	28.7027	28.6016	28.5814	29.401	28.7114	28.7565	28.9969	29.1795	29.5202	27.8782	28.7314	29.3841	27.9469	27.8182	29.0178	28.1962	28.9671	29.084	29.285				14	8	8	67.2	46.3	46.3	27.85	0	323.31	24723000000	536
26.5898	26.5359	26.452	27.0317	26.4856	26.1481	26.5992	26.5255	25.6109	26.4816	25.8027	26.9007	26.5253	26.3934	26.6722	25.8004	25.6625	26.6922	26.7384	26.3656	25.8217	26.4827	26.7717	26.572	26.3788	26.3258	26.5014	26.3421	26.1562	26.1507	26.4027	26.7053	26.04	26.4281	26.2013	26.8772				11	11	11	23.8	23.8	23.8	62.639	0	184.53	4335000000	372
27.5475	27.0668	26.1997	27.2834	26.6342	27.2978	27.364	27.5879	27.7846	26.5511	27.2548	26.5026	27.5696	27.4784	25.9558	28.1727	26.9591	26.6224	25.5444	26.3965	27.6822	26.1739	27.1882	26.9053	26.652	25.3829	26.8225	26.2225	26.9529	26.1692	25.9271	26.8204	26.9257	26.8019	27.3241	26.0664				4	4	4	56.2	56.2	56.2	11.74	0	323.31	9109600000	298
28.2552	28.266	28.5301	28.5944	28.6316	27.9348	27.8086	28.1729	27.8085	28.0348	28.1751	28.0053	27.8188	27.8647	28.467	27.5617	30.3591	28.5596	28.4416	28.04	28.0876	28.4818	28.2263	28.4926	28.3802	28.6101	27.3089	28.8243	28.2244	27.9131	27.8948	28.0616	28.1148	28.5336	27.697	27.3953				8	7	7	48.5	42.9	42.9	21.892	0	323.31	18988000000	385
28.136	26.1157	26.7881	26.5319	26.4147	28.6669	27.6173	29.4364	25.8263	26.3063	24.6639	26.7638	28.0341	22.9937	27.2456	25.8063	25.5625	28.2599	26.4853	29.0034	25.6769	25.6892	27.6621	27.5819	26.7919	26.9087	25.727	26.9778	29.0606	26.0309	26.7001	27.2818	25.7291	26.392	26.8259	24.8396				21	21	14	49.8	49.8	35	67.93	0	323.31	7677800000	325
26.2774	24.0923	25.0189	25.5945	26.104	26.0097	25.5617	26.7836	24.1755	25.4216	24.519	25.9096	25.7465	23.564	24.8298	24.2768	24.4432	26.7596	25.1485	25.8991	24.5972	25.8884	26.1613	25.3935	24.9435	25.4643	24.6824	25.1012	26.3629	24.9494	25.3272	25.8271	24.6046	25.445	24.5738	24.3825				13	10	9	38.1	32.8	29.6	67.208	0	168.01	1936800000	184
26.5131	26.8007	26.7976	26.7149	27.4777	25.1065	25.6059	25.5508	26.1668	26.3656	25.7968	26.3034	25.0926	25.1864	25.5093	26.2729	25.5357	26.4353	27.0805	24.9653	26.0495	27.0298	26.5604	26.2331	26.6946	27.3136	24.7287	26.2477	26.7226	25.8535	25.5008	26.5945	25.1136	26.8323	25.1094	27.1051				6	6	6	14.4	14.4	14.4	59.54	0	115.46	3214300000	169
27.5278	26.4338	27.0971	26.8025	26.5473	26.8582	26.404	26.8388	27.0639	26.6106	26.7085	25.9808	26.8288	26.5159	26.6726	25.9805	25.2066	26.8934	27.0075	26.6783	25.5979	26.6065	26.8102	27.4297	27.0157	27.3215	26.4556	26.9432	26.8561	26.4115	25.2924	26.8098	26.3706	26.7052	27.6166	27.8964				7	7	7	49.5	49.5	49.5	21.863	0	323.31	4591400000	151
22.0581	23.3005	22.724	22.9393	22.9296	23.2908	23.0302	24.0449	23.7342	24.3014	23.4805	24.3471	23.4422	23.3348	24.0663	25.2615	23.1577	24.2025	22.5194	24.6218	24.0988	23.6237	24.1298	22.8646	24.1067	23.9934	25.3644	23.8584	23.6919	23.9827	24.5047	23.7695	24.3471	22.5462	23.749	22.3325				10	10	8	15	15	11.9	109.68	0	208.17	664540000	107
25.4469	26.2495	25.5644	25.855	26.0191	25.5451	26.2563	25.3921	25.3032	25.3818	25.5999	25.6418	25.407	25.2979	25.379	26.1603	25.5048	25.5225	26.0607	25.3188	25.946	25.6743	26.0699	26.2521	25.3575	25.6517	25.1528	25.5767	25.8886	25.6706	25.4748	25.7692	25.1144	25.8043	25.6376	25.9971				10	10	4	28.2	28.2	12	59.251	0	314.58	2277100000	224
28.4058	27.7284	27.0386	27.6772	28.2687	25.8464	26.1224	27.6693	26.2068	27.9219	27.3315	28.2553	26.6346	26.7556	27.3714	27.1221	26.8427	27.5777	28.1419	26.8574	28.0214	28.1979	28.3247	27.6787	27.6947	28.4799	26.8891	27.7833	27.8132	27.275	27.3908	28.6225	27.2069	27.822	28.257	27.6771				10	10	10	59.6	59.6	59.6	37.191	0	323.31	8588300000	255
25.1759	25.3449	25.0469	26.0072	24.9208	24.9865	25.1553	24.6793	23.9994	25.5587	24.4942	24.792	24.8868	23.9429	24.2463	24.5097	23.4406	25.3852	25.0193	25.0403	23.551	24.9293	26.0846	25.584	24.3757	24.0811	24.3337	24.7661	24.4556	24.7578	24.0206	25.1598	24.2973	22.0724	26.0168	25.7598				4	4	4	35.4	35.4	35.4	17.748	0	277.74	1332200000	104
22.9802	23.0994	23.2603	24.9461	24.0809	23.6769	23.5192	23.2852	20.5842	24.7505	22.9948	24.2694	23.8088	21.0174	22.7898	22.6805	21.2838	23.2388	23.6985	24.6969	23.8773	24.0617	25.2022	23.4319	23.9668	22.9568	24.1723	23.2432	22.979	24.1522	23.5878	24.2851	23.3805	23.4584	24.298	23.9263				12	12	12	19.6	19.6	19.6	96.557	0	240.66	569280000	135
27.6615	27.4759	27.2114	27.5155	27.5126	27.3396	27.4461	27.7048	26.8433	27.539	26.9912	27.6977	27.4336	26.7631	27.6308	27.4497	27.2347	27.5717	27.6215	27.4601	27.0675	27.3105	27.849	26.9978	27.3044	27.5134	27.4425	27.2867	27.294	27.1568	27.4023	27.6559	27.1123	27.4385	27.4201	27.509				22	22	20	40	40	36.4	94.33	0	323.31	7160800000	450
27.6817	28.3864	28.5021	28.0416	27.9146	28.167	28.7666	28.0134	27.6656	27.9242	28.3212	27.9854	28.316	28.1458	28.4522	28.0618	27.877	28.0622	27.9507	28.4248	27.5308	27.9008	27.5135	27.864	27.6025	27.5249	28.3533	28.4745	27.3706	28.6942	28.5512	27.6995	28.0164	28.032	27.9229	27.8976				12	12	12	68.4	68.4	68.4	29.804	0	323.31	11511000000	372
27.1729	26.5441	27.2453	27.0254	27.4989	27.7247	26.953	27.4457	27.6728	26.7623	26.4443	26.6665	26.8307	27.3501	26.455	26.6103	26.6617	26.8551	26.814	26.6503	27.075	26.6253	27.0483	26.6895	27.2623	26.8209	26.462	27.2608	27.278	26.4092	26.6514	26.7391	26.3386	26.6975	27.3667	27.4059				16	16	16	61.4	61.4	61.4	42.621	0	256.99	5265900000	354
26.8071	26.5898	26.077	26.0597	26.3307	25.51	26.0737	25.872	24.5831	25.8085	25.5582	25.6529	25.6368	25.349	25.6374	25.563	25.1469	26.0594	26.4744	24.9933	25.9969	26.1856	25.4969	26.6072	25.9875	26.5316	24.8795	26.2905	26.3553	25.1864	25.1474	26.4975	25.3758	25.8684	25.4797	25.9658				6	6	6	78.5	78.5	78.5	13.569	0	127.33	2740600000	192
27.8289	28.4322	28.4294	28.6216	28.713	27.9383	28.4169	28.3937	27.1202	28.2343	27.6495	27.621	28.1763	27.956	28.2864	26.6189	27.9545	28.5122	28.7157	27.7514	28.1067	28.024	28.4767	28.3482	27.6186	28.1514	27.6217	28.5636	28.2948	27.5472	27.8562	28.4715	27.6967	28.2596	28.4614	27.9764				4	4	4	50.8	50.8	50.8	14.787	0	323.31	12228000000	249
23.8576	24.9271	23.3752	23.7976	23.5432	24.3945	25.0113	23.0422	24.3682	22.8087	24.3817	24.6762	23.9626	24.4452	22.2286	23.9164	24.7336	23.6989	23.3286	23.207	23.3817	23.5486	23.2115	23.1387	23.5664	22.0725	23.2134	23.2643	23.7537	22.8959	22.6385	22.909	23.4184	22.3312	23.0334	25.8212				5	5	5	31.4	31.4	31.4	28.048	0	144.88	822550000	111
26.2505	27.0257	28.6608	26.8007	26.6369	28.9837	28.5559	27.5124	29.514	29.6897	29.2248	28.7659	28.1424	28.8115	28.9101	30.1011	28.9122	27.6823	27.9411	28.2533	29.2081	28.2211	26.833	25.3198	28.4119	27.3174	29.1578	27.7059	27.6929	30.3224	30.0176	25.433	29.8685	29.7	27.5254	24.079				31	31	31	18	18	18	312.3	0	323.31	20024000000	665
30.73	31.3986	31.4532	31.2297	31.4926	30.7695	30.5979	31.0197	31.0207	31.5143	30.9009	31.5438	30.7239	31.3935	31.6933	31.3297	31.6672	31.1284	31.39	31.4352	31.3727	31.3472	31.3422	30.7782	31.7296	32.0106	32.2077	31.3114	31.338	31.5935	31.6918	31.6659	31.5852	31.432	30.9426	31.5027				67	67	59	39.1	39.1	34.7	226.53	0	323.31	129630000000	2949
23.8925	25.7221	26.0424	25.0374	26.2929	26.3591	26.0148	25.8662	25.9401	25.9268	25.9048	25.1041	25.9352	26.7922	26.3333	25.4969	26.2188	25.8497	25.6317	26.4794	26.2806	26.1528	25.8817	25.3952	26.1181	25.7762	26.8711	25.7993	25.5224	25.867	26.5249	25.4422	26.2605	25.9809	25.9151	26.1954				16	16	16	30.2	30.2	30.2	99.045	0	323.31	2635300000	226
23.4269	24.4331	25.1022	24.7079	25.0404	24.5039	23.9044	22.0207	24.1601	25.2616	24.3674	24.9386	24.253	24.5689	25.9764	24.3729	24.9436	26.5076	24.9208	25.2996	24.8446	25.0273	23.9197	23.9027	25.0242	25.4561	25.0589	24.9557	23.245	25.401	25.7975	24.7467	24.9513	25.4196	24.3287	24.8518				9	9	9	26	26	26	69.984	0	64.142	1332200000	131
27.9313	27.9778	27.5339	27.7647	27.726	27.4191	28.0128	27.9094	27.3222	26.875	27.1951	27.2271	27.7136	27.3493	26.6674	27.8536	27.0726	27.9059	27.4296	26.9127	27.5287	27.0011	28.0012	28.0605	27.4861	27.0238	25.8997	27.2427	28.048	26.5832	26.0213	27.4972	26.6473	27.127	26.9415	27.3591				7	7	7	83	83	83	11.776	0	276.4	7562700000	173
26.2978	26.0879	26.145	25.8196	26.6199	26.0803	25.5694	25.6707	25.2364	26.0313	25.2922	26.2139	25.5918	25.4645	25.7726	25.3064	26.0551	25.8299	25.995	25.9219	26.1024	25.7154	25.963	25.7657	25.9945	26.7292	25.9679	25.7974	26.1153	26.2845	25.8803	26.1617	25.5572	26.0397	25.8629	26.2152				15	15	15	46.2	46.2	46.2	48.633	0	123.43	2732500000	314
28.2766	28.2856	25.6055	27.6257	27.7148	28.3608	27.4934	26.9311	27.6519	27.0219	27.5222	27.6616	27.2482	27.6387	26.2996	28.4218	27.7066	28.3179	27.0849	26.7892	28.029	27.0477	26.1687	27.2462	27.6964	26.9135	25.5973	27.8366	27.3405	27.192	27.0092	26.5309	26.6839	27.0973	27.0323	26.4837				12	12	12	35.8	35.8	35.8	62.332	0	323.31	8950600000	397
26.1765	27.3545	24.898	25.354	25.3053	26.1679	25.8744	26.2996	25.638	25.2248	25.1994	25.5874	25.7648	25.1806	24.5855	26.5599	25.8556	26.2797	24.8077	25.6511	25.6136	25.3542	25.7404	25.4684	25.0444	25.7316	25.0842	24.9936	26.0621	24.9394	24.7919	25.1608	24.7024	25.0713	25.8746	26.0404				5	5	5	25.7	25.7	25.7	26.145	0	178.47	2815300000	230
27.5424	28.1018	28.1641	28.1409	28.0908	28.0104	28.0105	28.5233	27.7525	28.7245	28.0261	28.5306	28.3046	28.2222	28.97	27.8853	28.0235	27.7269	28.4602	29.1715	28.4703	28.3364	28.7616	28.4745	28.3861	28.5749	29.1756	28.7346	28.318	29.013	28.9103	28.2847	28.7379	28.5086	27.9899	28.1785				10	10	10	28.6	28.6	28.6	47.697	0	115.86	14479000000	274
25.62	25.3243	25.1859	25.9809	25.9608	25.3956	25.4863	25.2438	26.0624	26.0703	25.7641	25.9991	25.4524	26.0566	25.6819	25.1495	25.3262	25.1469	25.6507	25.1208	26.7203	25.2948	25.8458	25.3002	25.5504	26.108	25.9914	25.7259	25.5518	25.3538	25.4677	25.2068	25.9319	25.7276	25.5792	26.2141				14	14	14	32.7	32.7	32.7	61.448	0	323.31	2285700000	265
25.2981	26.0385	27.075	25.7258	25.6041	26.8334	25.7542	26.1864	25.1429	25.8857	26.1166	26.1406	26.8035	26.4567	27.1898	26.1071	26.6258	25.9321	25.7876	27.1346	26.0183	26.3197	25.6701	25.8772	25.6325	25.3886	26.4862	26.7754	25.4695	26.8615	27.1504	25.5491	25.9234	25.5587	26.1856	25.1032				6	6	6	16.6	16.6	16.6	48.755	0	323.31	3196200000	146
24.4475	25.6679	25.9193	24.9284	24.6463	24.4198	24.412	25.756	23.6632	25.0689	24.1132	24.2726	24.8669	24.5345	25.813	24.4763	25.5657	24.5422	24.8853	25.3969	24.2959	24.4182	24.082	25.0888	24.184	22.9444	24.5417	25.2826	23.4661	24.8501	24.6799	24.6515	23.9973	24.3504	24.6094	22.5303				4	4	4	46.3	46.3	46.3	14.57	0	323.31	1449400000	124
23.8692	24.6153	23.9714	24.8689	24.5142	23.3623	23.4985	23.8423	23.9339	24.03	23.3539	24.0057	23.337	23.0166	23.4175	24.6873	24.0528	23.9406	24.5495	23.5581	23.4832	24.0508	23.853	23.512	24.0173	24.0514	23.2929	23.9342	24.4963	23.4368	24.0034	24.6933	23.5663	23.6155	23.2503	24.0761				4	4	3	23.3	23.3	19.2	22.313	0	160.97	721180000	93
31.2672	30.5431	30.3227	30.8813	30.7102	30.5654	30.6122	30.7654	30.5514	30.6507	30.4733	30.9204	29.9525	30.2126	30.3018	30.6838	30.0917	30.6746	30.7248	30.1213	30.8069	30.9697	30.6817	30.7098	30.1282	30.4733	30.1022	30.375	31.0817	29.9987	30.0714	30.6063	30.3715	30.4766	30.7742	30.4952				11	11	11	60.3	60.3	60.3	22.391	0	323.31	87661000000	1448
28.5108	27.4082	27.9606	28.5696	28.3841	28.493	27.4131	28.1579	28.2059	27.8361	27.7223	28.0348	28.3951	28.2488	27.9798	27.125	26.9798	28.0337	28.1215	27.6417	28.2732	28.4302	28.5757	27.7942	27.5126	28.208	28.0465	28.2684	28.2142	27.939	27.7305	28.736	27.8289	27.7064	27.816	28.2879				7	7	7	21.4	21.4	21.4	37.54	0	164.35	10791000000	176
26.6518	25.952	26.6335	26.3544	25.9457	26.9419	27.1465	26.8829	26.2809	26.149	26.397	26.312	26.8758	26.9825	27.2203	25.6344	25.9929	26.7866	26.0203	26.4124	25.7066	27.0409	26.3719	26.6972	24.9875	25.7367	26.4369	27.066	25.9589	26.3236	26.6403	25.7841	25.7428	26.2738	26.0884	26.3375				7	7	7	29.4	29.4	29.4	27.843	0	217.85	3549800000	121
27.9544	27.0406	26.9047	26.5923	27.7982	27.9197	27.434	28.4311	27.0194	27.2653	27.194	27.1494	27.6597	27.1161	26.8226	26.6108	26.8571	27.4373	27.0035	28.0387	26.9307	26.9342	27.5836	27.4895	26.9562	26.5732	27.3033	27.0374	27.7793	27.0699	26.9542	27.3588	27.0407	27.2207	27.5922	27.3823				18	18	18	54.8	54.8	54.8	64.735	0	323.31	7682100000	512
26.7203	26.2331	28.4085	26.9937	26.96	27.9651	27.9127	27.6068	26.895	27.4384	27.7027	27.6649	27.9474	28.055	28.2124	26.7944	27.0173	26.988	26.4427	28.5664	27.4918	27.4324	26.8622	26.5426	26.6421	25.9784	28.482	27.9204	25.8033	28.2112	28.2778	26.5969	27.5929	27.0596	27.4336	26.8802				14	14	14	35.9	35.9	35.9	73.68	0	323.31	8042800000	324
24.998	25.8197	25.7543	26.1617	25.6832	25.2423	25.2712	25.0825	24.5967	25.7792	25.0578	25.6846	24.865	24.4206	26.0889	25.784	25.4842	24.9915	25.3371	26.0736	24.9217	25.4929	25.8265	25.8865	26.1791	25.981	25.7374	25.9064	25.1961	26.0545	25.1411	25.953	24.9065	25.4171	25.032	25.4213				11	10	10	39.9	36	36	46.871	0	323.31	2007100000	191
29.5474	28.616	28.254	29.1749	28.8116	28.587	28.7403	28.8826	28.5296	28.1647	28.0782	27.9625	25.551	28.8815	28.8163	28.0191	27.4977	29.1649	29.0815	28.2025	27.5228	26.2939	29.0819	28.9115	28.3407	28.752	27.3095	29.1239	28.8815	27.8841	28.0162	28.8847	27.018	28.1468	28.0726	28.7072				5	5	5	28.3	28.3	28.3	16.06	0	195.34	14291000000	134
25.0035	25.8095	26.0203	25.4702	25.0296	25.6234	24.5975	26.1282	25.1823	25.993	25.3705	25.6415	26.4643	25.5672	26.6514	23.9013	25.214	25.6668	24.5014	26.3113	25.7106	26.2848	25.1762	25.5026	26.0946	25.4588	25.9098	25.8739	24.5672	25.8136	25.398	26.1171	26.0191	25.5582	26.071	23.9329				5	5	5	22.6	22.6	22.6	46.108	0	76.179	2538500000	190
25.3216	25.269	25.5303	26.0321	24.876	26.6579	26.1013	25.4905	26.8623	25.0188	26.1737	25.2036	25.6052	26.5148	25.7615	26.5575	26.2209	25.7603	25.0615	25.5905	25.6406	24.1092	24.5659	25.3712	25.1942	24.6516	25.7678	25.6998	25.8208	25.945	26.0672	23.9947	25.6738	24.568	25.5629	23.1786				9	9	9	12.9	12.9	12.9	135.76	0	311.76	2184900000	162
26.2005	25.83	26.7285	27.0449	26.9909	26.5524	27.2982	26.0402	26.8465	26.0819	26.8714	26.151	26.5311	27.567	26.7334	27.2229	26.924	25.8462	26.474	26.745	26.6991	26.1349	26.2667	26.3381	26.7752	25.9996	27.3928	26.7103	26.5884	26.6481	26.4652	25.8364	26.5522	26.5006	26.8267	26.7195				13	13	13	49.1	49.1	49.1	50.8	0	323.31	4753700000	295
29.1961	27.8749	27.8038	27.8618	27.7325	27.3719	27.4168	28.1578	27.7181	28.2277	27.8098	27.3976	27.7312	27.9446	28.5892	27.8037	27.1544	28.1833	28.2266	27.9556	28.1438	28.7746	28.6729	28.2588	28.1792	28.3912	26.8787	27.7494	28.4104	27.3424	27.3746	28.0935	27.0361	28.6845	27.6792	28.06				8	8	6	41	41	35.7	28.585	0	323.31	10893000000	219
29.9754	28.2953	28.6146	28.179	28.6595	29.6498	27.876	29.8845	29.1205	29.195	28.663	29.8399	27.1738	28.2712	28.4417	28.5116	27.9111	28.5317	29.8479	29.5465	27.9584	29.2386	29.8792	29.0729	28.5346	28.267	28.4588	28.7378	29.9466	28.7001	28.489	29.9043	28.4652	29.115	28.5878	28.1778				9	9	9	54.3	54.3	54.3	38.498	0	323.31	24230000000	542
26.9458	27.7199	27.1355	27.0845	27.3497	27.2117	26.7546	27.3736	26.6823	27.3221	27.1702	27.3564	27.6842	27.4695	27.5665	27.1641	27.6116	26.5904	27.0991	27.7129	27.8356	27.8185	26.8777	27.1576	27.8827	27.7497	27.714	27.4706	26.9063	27.52	27.3731	27.6033	27.087	27.4701	27.3987	27.6684				16	16	13	41.1	41.1	35.4	58.024	0	323.31	7486100000	444
29.1526	29.0346	27.2498	28.6108	27.4882	28.4477	27.5646	29.2625	27.423	27.9322	27.8965	28.4963	27.9675	25.1538	27.6953	27.896	27.0546	29.1909	27.7076	28.1141	27.5884	28.4501	26.5079	28.8983	28.655	29.0188	25.5991	27.2388	27.4898	27.1943	27.7627	28.9111	27.9527	28.1923	26.629	27.1417				5	5	5	51.6	51.6	51.6	28.936	0	323.31	13252000000	307
24.8978	25.56	25.9126	26.466	25.9224	24.8813	25.0582	25.0138	24.4682	25.5141	24.7018	24.9494	25.1136	24.5442	25.4447	24.9638	24.9646	25.8098	26.0005	25.8126	24.2453	25.5518	25.6905	25.955	25.5749	26.8375	25.3217	25.4077	25.0429	25.064	25.3324	25.3038	24.7855	25.4345	25.4554	26.4203				3	3	3	16.7	16.7	16.7	23.577	0	43.914	2280200000	325
26.0964	24.2978	25.214	24.9003	24.7629	26.0962	25.4458	25.5947	25.1289	25.4285	25.4378	25.7361	25.1818	24.8902	24.9045	25.0754	25.6521	25.2049	25.213	25.9576	25.2766	24.9184	25.2609	25.534	25.1579	25.4798	25.305	25.0254	25.6501	25.2012	25.0265	25.4973	25.2539	25.0347	24.4717	25.0881				11	11	11	25.9	25.9	25.9	83.125	0	323.31	2043900000	171
28.3323	27.4507	26.5995	26.8527	27.6555	26.8757	26.7343	27.6925	26.7316	27.2882	26.8386	27.1541	26.322	25.5962	26.8764	26.9942	26.9078	27.5667	27.149	26.5569	26.5446	27.4606	27.6544	27.0434	26.5432	27.7288	26.3908	27.0079	27.7897	26.834	26.7349	27.1624	26.8086	27.2466	27.5199	27.457				9	9	9	44.9	44.9	44.9	38.627	0	323.31	6843800000	473
27.6636	27.3878	28.5122	27.4132	27.0708	28.0642	27.9035	28.2299	27.2293	27.7177	27.8078	27.6046	28.2292	27.7554	28.445	27.6676	27.4042	27.984	27.3652	28.2051	27.5575	27.995	27.4312	27.9002	27.0745	26.932	27.996	28.3954	27.1953	28.1427	28.0907	27.4234	27.6149	27.7954	28.2668	27.1737				12	12	12	49.7	49.7	49.7	35.503	0	323.31	9706200000	401
26.9993	26.9053	26.5188	26.7095	27.3486	26.5409	26.8055	26.7923	26.3655	26.3919	26.3203	26.7238	26.7108	26.8242	26.7255	25.8215	25.6393	27.5072	27.2426	26.8416	26.6298	27.2798	27.1005	26.9376	26.9684	27.368	26.5131	26.6277	26.7161	26.1509	26.26	26.9255	26.283	26.7557	26.5682	27.3634				9	9	9	34.3	34.3	34.3	51.109	0	154.62	4428200000	114
25.6527	25.5964	26.0451	25.9063	26.6235	25.6221	24.5361	25.8447	25.2186	25.8459	24.7726	25.835	26.0194	23.5187	25.493	25.4114	24.9435	26.3363	26.1566	25.7997	25.7974	25.6536	25.9641	26.1473	25.8768	25.7981	25.3406	25.8337	26.1572	25.4877	25.4185	26.0404	25.4249	26.4456	25.2659	25.2027				13	13	13	21.8	21.8	21.8	111.69	0	323.31	2256700000	258
25.8033	26.4338	27.1785	25.9099	24.9611	24.5456	24.9735	26.134	24.0561	26.6795	24.6466	26.1426	26.104	24.9812	26.9588	24.8188	25.0528	26.0617	26.6058	26.7742	25.6795	26.144	26.5695	25.9897	26.5703	26.5985	26.043	26.5096	26.1228	26.3882	26.1993	26.6687	25.5665	26.8355	23.4273	24.9296				16	16	16	48.9	48.9	48.9	50.704	0	323.31	3024500000	247
25.7673	25.4567	25.5117	25.3965	25.5984	25.9135	24.9226	25.7435	26.0061	25.7018	25.4223	25.401	26.0663	25.6707	25.0375	26.3458	26.0619	25.6048	25.3016	25.4892	25.7262	25.792	25.9265	25.2657	25.7035	26.0614	25.7809	25.1828	25.4709	25.2417	25.1776	25.6234	26.0047	25.3283	26.668	26.9129				12	12	12	30.4	30.4	30.4	83.165	0	323.31	2097000000	327
24.9913	24.9837	25.2454	25.6551	25.2906	25.0076	24.5429	24.7841	24.46	25.3235	25.0099	25.2101	24.9651	24.7051	25.2413	24.9475	24.5474	25.0912	25.2366	25.4804	25.1609	24.9268	25.4305	24.8499	25.4896	25.7856	25.6396	25.0979	24.9608	25.1354	25.2045	25.5197	25.1298	25.3412	24.8746	25.8921				22	22	22	27.3	27.3	27.3	144.5	0	138.92	1485200000	300
26.7617	26.4871	25.7986	25.7691	25.6181	21.7784	26.7738	25.4424	26.1366	26.2218	25.5129	25.9015	26.4834	25.7338	26.0667	26.6645	25.7306	26.0991	25.5835	25.3138	25.8723	25.8566	25.8535	26.9588	26.1216	26.1063	25.7737	26.6095	26.4107	26.0669	25.8265	26.3051	26.6375	26.4277	25.8896	26.3953				5	5	3	53.1	53.1	40.7	12.732	0	126.94	3313600000	143
26.1334	25.4615	25.7145	24.8492	25.7963	25.6471	25.7604	25.4821	25.2249	25.1373	25.649	25.253	25.6767	26.1488	25.2953	24.9735	25.7816	26.0211	25.2113	23.767	25.3757	25.7823	25.414	24.9809	24.7292	25.5901	24.8661	26.0832	25.4731	25.5584	25.3568	25.5288	25.1248	25.0338	25.6122	25.3498				5	5	5	26.2	26.2	26.2	32.816	0	286.4	2205800000	166
27.7368	27.7065	28.3222	27.603	27.5789	27.6293	27.622	27.7953	27.0429	28.2691	27.6877	28.152	27.7337	27.5475	28.3748	27.4201	27.3196	27.8341	28.1338	28.5863	27.1394	29.0535	27.7799	28.4719	27.6199	28.2674	28.224	28.9008	28.0592	28.4437	28.5088	27.8265	27.3772	28.0305	27.0122	27.1281				15	15	8	38.2	38.2	22.5	75.491	0	323.31	10508000000	197
29.6628	28.6013	29.0373	29.4043	29.1972	29.9714	29.2882	30.4887	28.0089	28.8245	28.2256	29.4397	29.039	27.4868	28.6573	28.3103	27.5809	30.5024	29.2517	30.1986	28.1178	28.767	30.1372	29.8185	28.9404	28.9441	28.0834	28.701	30.1858	28.218	28.1673	29.5528	28.2204	29.5039	29.2343	27.7407				27	27	3	51.9	51.9	6.3	87.334	0	323.31	29595000000	1172
22.3547	25.1584	24.8938	24.3133	25.0549	24.3302	24.657	24.3857	23.7457	24.3164	24.4499	24.8442	24.9748	24.035	24.7624	23.3868	24.3997	25.2112	24.3867	24.4694	24.5745	25.1956	24.7038	25.4888	24.8867	24.9504	24.1013	24.8302	24.5507	23.4352	24.6132	24.9536	24.1197	23.4165	24.0072	25.1873				8	8	8	12.4	12.4	12.4	94.134	0	21.615	1045900000	141
24.3763	25.7431	25.8154	25.0195	26.0793	25.5069	24.6884	25.0152	24.5021	25.3511	24.7827	26.9628	25.0294	24.6217	24.5954	25.4229	25.1055	25.982	25.7753	25.3189	25.2152	25.693	25.334	25.3469	25.822	25.382	24.5624	24.739	25.562	25.1197	25.3269	25.5642	24.9873	25.5793	25.3003	24.7386				13	13	6	20.8	20.8	11.3	86.948	0	194.88	2026800000	198
25.2429	25.5827	26.3811	25.5923	25.3881	24.6077	24.9632	25.667	24.4986	25.663	24.5685	25.828	25.1822	24.3463	25.502	25.3366	25.3436	25.3999	26.2133	25.9199	24.9354	26.0771	25.6601	25.8185	26.3124	26.4064	25.4335	25.1641	25.6145	25.4696	25.6444	25.9859	25.1821	26.0242	24.689	25.17				12	12	12	29.8	29.8	29.8	72.43	0	323.31	1975800000	232
24.6459	25.0506	25.5001	25.3114	24.9358	25.1443	25.0127	24.8472	24.3801	25.2739	25.4182	25.0299	24.6807	25.1961	25.2619	24.1112	23.6474	24.9461	25.7264	24.9043	24.9114	24.9276	25.154	23.9701	24.9012	25.4613	24.8851	24.7581	24.8511	25.1213	24.9222	25.0928	24.1255	25.3111	25.2041	24.4942				15	15	15	31.2	31.2	31.2	98.655	0	323.31	1314400000	216
23.9774	23.481	25.7613	25.384	24.249	25.5785	25.6035	25.4376	24.534	24.8772	25.3759	25.2179	25.0918	25.5933	25.4183	24.7783	24.9958	25.2376	24.6916	25.5361	25.2015	24.863	24.809	25.252	24.6853	23.3664	25.692	25.2953	24.2293	25.9343	25.6222	24.5608	25.3358	24.8628	25.5018	23.5624				8	8	8	43.1	43.1	43.1	41.924	0	323.31	1542500000	228
27.866	28.0272	28.039	27.6421	27.7093	26.8706	26.9277	27.7117	26.5239	27.5137	26.7783	27.6466	27.1089	26.0263	26.9789	27.8418	26.0694	27.8447	28.1698	27.067	26.6266	27.9557	27.7922	28.0905	27.5404	28.1947	26.483	27.2882	28.0822	26.8094	26.8564	27.9395	26.6917	27.5714	26.6484	27.2715				7	7	7	26.7	26.7	26.7	52.912	0	220.83	7712500000	300
24.3742	24.8934	24.6568	25.1668	24.1162	24.2394	24.3858	24.9217	24.4754	25.3899	24.4219	24.9769	24.8384	24.6372	25.4724	23.6187	22.9551	24.5972	24.8311	24.908	23.1777	23.7971	24.889	24.9557	24.7824	24.7856	24.6474	24.9171	24.5036	24.8991	24.9313	25.121	24.6531	25.0567	23.9612	24.0362				3	3	3	9	9	9	46.637	0	185.67	1041900000	78
27.5733	28.2442	28.3692	27.8988	27.9842	27.4542	27.4409	27.2984	26.9778	28.0479	27.321	27.9885	27.1478	26.933	28.0634	28.0097	26.9522	27.5185	28.0891	27.8198	27.8821	27.4126	27.8276	28.095	28.0175	28.2103	27.866	28.1023	27.9605	27.9829	27.9333	27.8734	27.5583	27.894	27.5095	27.5453				9	9	6	16.8	16.8	10.6	94.622	0	323.31	10981000000	340
25.2665	26.2053	24.4106	25.4806	25.9426	25.1021	25.4319	25.1745	26.1294	25.0598	25.8573	24.7196	25.6575	25.5075	24.4091	26.8803	27.2568	25.5257	24.775	25.0921	26.0576	25.1993	24.967	25.6319	23.6442	25.2022	25.7079	25.2959	24.5183	25.1056	24.2739	24.58	25.4704	25.0826	25.8733	25.7875				3	3	3	18.2	18.2	18.2	32.235	0	189.35	2506100000	150
27.5212	26.7119	26.0877	27.0709	26.9496	26.1905	26.6675	27.0498	25.7545	27.4194	26.3	27.6186	26.6572	26.168	26.1222	25.8989	25.4368	26.7629	26.962	26.4254	25.9641	26.8557	26.3984	26.4359	26.9168	26.857	26.3114	26.6641	27.3922	26.6943	26.6665	28.1846	26.1638	26.9492	27.1633	26.8808				4	4	4	39.5	39.5	39.5	23.239	0	188.37	4652800000	113
25.1094	24.9262	24.8644	26.3648	25.381	26.9447	26.3529	26.7757	27.2432	25.9747	26.6472	27.0681	28.4294	26.173	25.9408	25.2358	26.8252	25.9709	25.2427	25.972	26.1807	24.7754	25.8309	25.0452	26.0063	23.9462	28.3067	24.8672	26.0247	25.9954	26.5313	26.1396	26.7773	26.0086	27.2817	27.6326				16	16	16	51.5	51.5	51.5	55.52	0	323.31	4116100000	297
25.4067	26.1515	25.8327	26.1451	26.6188	25.7333	25.165	25.9053	24.983	25.804	25.0663	26.2104	25.8871	25.0975	25.4335	25.2733	25.6079	25.5272	26.1425	26.0325	25.9244	25.6328	26.0712	26.1542	26.1991	26.6935	25.9415	24.9506	25.6574	25.6856	25.6218	26.2917	25.5858	25.9019	25.7328	26.3458				10	10	10	47.1	47.1	47.1	47.366	0	323.31	2425600000	274
27.5721	27.9669	28.0332	27.7231	28.0342	27.8313	27.685	27.837	27.4497	27.9535	27.4764	28.0019	27.7565	27.2817	27.8966	27.5067	27.4539	27.9035	28.1115	27.9572	27.7719	28.2808	28.0758	27.9357	28.2494	28.4776	27.5883	27.9082	28.0067	27.8871	27.7662	28.1653	27.8483	27.9826	27.2596	27.7879				19	19	19	35.8	35.8	35.8	93.307	0	323.31	9881500000	531
24.4531	23.3876	24.3191	23.8215	23.7018	24.0547	23.5104	24.264	21.8467	24.2661	23.8911	24.4252	24.6215	23.7669	24.739	23.6029	23.3515	24.0925	24.1466	24.7205	23.8639	24.0983	24.4529	24.387	23.8378	24.0376	23.82	24.1665	23.6961	24.4859	24.3178	23.5728	23.9711	24.7274	23.8895	24.5612				12	12	12	32.4	32.4	32.4	63.541	0	160.61	725950000	191
25.213	24.9968	27.1302	25.9142	25.607	26.2129	25.952	25.9385	26.2531	26.11	26.0586	26.4128	26.0655	26.3763	27.2534	25.8802	25.8993	25.6659	25.8656	26.6998	25.4964	26.4357	26.4244	25.2309	26.2407	26.899	26.8163	26.6192	25.2046	26.9677	27.0605	25.6735	26.319	26.2577	26.2043	25.2094				10	10	10	21.4	21.4	21.4	73.457	0	323.31	3297800000	217
25.4246	25.912	25.8642	25.9309	25.3613	25.3904	25.3422	26.0534	25.2654	25.8429	25.65	25.9674	25.8611	25.3733	25.9984	22.7668	24.845	25.9075	26.426	25.6372	25.2192	25.2068	26.0397	26.3016	25.6346	25.0818	25.7199	25.8313	26.0352	25.555	25.4323	26.1415	25.6436	25.9086	26.3149	24.9897				11	11	11	50.5	50.5	50.5	33.777	0	203.06	2173100000	233
25.515	25.6956	25.4409	25.8525	26.0159	25.333	25.3404	25.0613	25.1411	25.1538	25.057	25.1413	25.1168	24.1344	23.5485	24.9577	24.6366	25.6738	25.5923	24.738	24.9929	25.2716	25.4506	25.5515	25.5229	25.5232	24.4276	25.0029	25.1624	24.7423	24.9837	25.5821	24.9514	25.1936	24.8633	25.7533				10	10	10	15.8	15.8	15.8	118.69	0	141.99	1560700000	163
24.2645	25.0923	26.0372	25.5645	25.1166	25.3576	25.8263	25.4501	24.9104	25.1846	25.4018	25.6209	25.3676	25.8083	25.9154	25.1042	24.9767	25.5934	25.5218	25.4387	25.5247	25.254	25.5911	24.713	25.5573	25.4844	25.7975	25.4141	25.3671	25.8852	25.6323	25.5705	25.4483	25.498	24.6931	24.4438				12	12	12	21.2	21.2	21.2	82.593	0	131.2	1805900000	184
24.2406	24.1138	24.0135	23.6252	24.9188	24.1801	23.7803	23.9912	23.5594	23.9132	23.0757	24.5394	24.0424	23.7991	23.8731	23.3813	23.4604	24.5002	24.3692	23.4409	23.8718	24.309	23.9199	24.0118	23.9425	24.4253	23.5924	23.7319	24.2209	23.9169	23.6813	23.7504	23.6436	24.3438	23.1379	24.4792				4	4	4	19.2	19.2	19.2	33.149	0	183.78	664760000	65
25.1611	25.4426	26.2001	25.8357	26.3356	25.5039	25.6623	23.9059	24.9544	25.8592	24.9666	25.1317	25.7217	25.4659	26.4233	23.7575	24.414	25.3435	26.2068	26.1187	25.6078	25.9474	25.4906	25.4502	24.9586	25.4664	25.4487	25.693	24.6717	25.3122	25.6403	26.0956	25.5133	25.8652	25.6194	22.7624				6	6	6	36	36	36	34.362	0	192.19	1964000000	114
28.5634	27.9018	29.3596	28.5851	28.2519	28.0606	27.8061	28.1327	27.7299	28.0942	27.203	27.4443	28.2638	28.1493	29.0167	26.6232	27.262	28.433	28.8978	28.3843	27.4398	28.7182	28.3822	28.6673	28.0468	28.0348	28.0207	28.7016	27.9322	27.824	28.0986	28.3462	27.5373	28.3934	27.6401	27.7602				7	7	7	30.4	30.4	30.4	22.591	0	38.774	11626000000	174
28.3697	28.8921	28.1529	28.6264	28.7889	28.0349	28.0694	27.9797	27.714	28.0031	27.5726	27.9071	28.3606	27.8244	27.7602	27.9451	28.1043	28.4658	28.8126	28.0761	28.0098	28.7199	28.303	28.6554	27.7923	28.2644	27.5803	28.3653	27.9358	27.6225	27.8902	28.4991	27.6241	28.0638	27.8742	28.0027				7	7	7	34.8	34.8	34.8	22.876	0	323.31	13715000000	266
28.0647	29.1393	28.6108	28.6477	28.0925	28.2716	28.1535	28.3663	27.8469	27.9627	27.3256	27.6771	28.0522	27.571	27.9846	28.2327	28.5658	27.9943	28.6905	27.9064	27.4023	28.3026	28.1607	29.0905	27.7872	28.0864	27.5203	28.4202	28.0392	27.6879	27.5137	28.132	27.5972	27.8701	27.9096	27.9981				5	5	5	36.4	36.4	36.4	18.898	0	301.14	12204000000	313
24.4994	23.4833	24.0935	24.2256	23.933	23.7916	23.7061	24.9592	22.4992	24.0293	23.8105	24.1246	24.8176	23.6985	23.7533	24.2952	23.8125	24.3155	24.4327	24.1271	23.85	24.4989	22.9408	23.9411	24.4953	24.0732	23.721	23.8418	24.1193	24.1501	23.3999	24.0749	23.5496	23.7638	24.7974	23.8906				5	5	3	28	28	18	32.668	0	117.38	805920000	133
30.3147	29.9354	29.9723	29.9268	30.1757	30.1951	29.9575	30.4812	30.0942	30.0002	29.9929	30.2201	30.2807	30.1775	30.077	30.1425	29.5856	30.1322	30.1272	30.243	29.6493	30.1534	30.0504	29.5024	30.5697	30.8199	30.2729	29.8358	30.3817	29.9436	30.1027	30.4184	29.8898	30.2982	29.7736	30.2815				67	67	66	56.4	56.4	55.8	189.25	0	323.31	50757000000	1975
25.8815	24.4194	21.5796	22.4092	24.6425	25.576	24.6545	25.3007	25.1066	24.5431	25.2545	25.1321	24.4118	24.0056	22.848	24.4653	23.6292	25.5778	23.8574	24.1472	25.0131	24.4607	24.5017	24.7216	24.6846	24.4687	23.9031	24.5687	25.1593	21.6257	23.0107	24.0903	24.3565	24.1053	24.7555	23.9193				6	6	6	37.1	37.1	37.1	32.556	0	93.99	978010000	136
26.9074	26.1971	26.5853	27.1678	27.169	25.9159	26.226	23.7322	26.9149	25.1252	26.7102	26.6583	27.3449	26.7866	25.8196	26.7631	25.16	27.0284	26.3609	25.4135	26.545	25.8746	25.9924	26.1756	26.2915	26.3476	25.1913	25.4424	27.0296	25.3826	24.7424	26.5371	25.8801	26.6023	26.7624	28.1321				7	7	7	36.6	36.6	36.6	37.478	0	103.71	4415800000	180
29.0896	28.4215	28.4522	28.6818	28.6861	28.4615	28.8616	28.8943	28.4269	28.5602	28.0668	28.69	28.8204	28.5785	28.0447	27.972	27.2254	28.9497	28.7406	28.4881	27.9642	28.5484	28.7479	28.2028	28.7308	29.2957	27.8667	28.6691	29.0748	28.1473	28.3823	28.9452	27.7553	28.8037	27.8824	28.8862				10	10	9	54.2	54.2	50.7	32.949	0	323.31	16247000000	350
28.8414	28.1841	27.6521	28.3128	27.5808	27.8721	28.0821	28.6921	27.8695	28.2595	27.8371	27.6353	28.3995	27.9313	28.0599	26.8736	26.921	28.288	28.264	27.711	28.1051	27.7718	28.0015	27.957	27.992	28.5294	27.7288	28.0465	28.6288	27.8281	28.0276	28.2343	27.7252	28.2672	28.1476	27.5741				11	11	11	52.2	52.2	52.2	30.628	0	313.99	11644000000	328
27.162	26.3286	26.738	26.5906	26.8889	27.0923	26.7799	26.8523	26.8098	26.673	26.1831	26.9006	26.5332	27.0465	26.5325	25.8776	26.3192	26.8135	27.0332	27.1204	26.4797	27.1138	26.8817	26.4313	26.9178	27.185	26.9493	26.4467	26.7086	26.568	26.92	26.8675	26.8113	27.183	26.8186	27.6225				15	15	15	26.5	26.5	26.5	87.798	0	323.31	4565600000	444
26.8326	26.6112	27.8097	27.326	28.292	25.9963	27.7403	26.8316	26.2653	26.4144	27.2556	26.6287	26.9356	26.6757	27.2083	27.8894	25.8396	27.9156	27.9554	27.1356	27.3048	27.4567	27.1311	28.5304	27.2286	25.0767	25.9077	27.2737	27.6518	27.0122	26.7523	26.8597	26.7038	23.2567	27.0293	26.1089				4	4	4	28.1	28.1	28.1	29.668	0	108.76	6079700000	117
26.2984	25.2577	27.0744	26.2391	26.0039	26.8276	26.8691	26.8249	26.1737	26.1626	26.6087	25.8461	26.8599	26.8541	27.0435	25.8956	26.177	26.0235	26.4572	27.307	25.3142	26.5328	25.6519	26.4187	22.6984	25.2742	26.383	27.1284	25.8502	27.1317	26.6991	25.8348	26.2519	26.0645	26.3747	26.1688				7	7	7	49.3	49.3	49.3	23.277	0	174.33	3561900000	131
24.9748	26.1496	25.002	24.6072	25.4472	24.749	24.4274	25.3069	24.4207	25.4184	24.3212	25.4166	25.1906	24.4003	25.418	23.1735	26.0584	24.9447	25.4452	24.9445	25.3016	25.2841	25.139	25.1251	25.9312	25.7262	25.2776	25.1526	25.2558	24.6974	25.1443	25.5498	24.7304	24.773	24.4731	25.2648				13	13	13	27.2	27.2	27.2	80.699	0	303.14	1671800000	205
23.1606	23.3656	24.5677	23.7194	24.1493	24.2487	24.4492	23.7792	24.1132	24.38	24.279	24.5114	24.0189	24.3086	24.6511	24.1621	24.8915	24.404	24.1897	24.969	24.6449	24.368	24.6547	24.0645	24.392	22.3097	25.4071	24.4849	23.9259	24.6541	25.0841	24.3016	24.9142	24.2135	24.5179	24.2378				10	10	10	30.9	30.9	30.9	57.21	0	45.31	926950000	155
22.7074	23.5967	22.673	21.855	22.6522	22.1672	21.5924	22.9902	22.2818	22.2637	22.369	22.1159	22.2884	20.9104	21.9542	22.875	23.3943	22.4277	21.8038	23.1318	21.7126	22.8013	22.5306	22.208	23.2285	22.8698	22.4806	22.3533	22.5309	21.6575	21.6253	22.4777	21.9176	22.4406	22.9169	22.9336				4	4	4	12.6	12.6	12.6	39.611	0	106.87	349300000	231
26.4891	25.9193	25.0201	26.0496	26.6094	26.0539	25.9854	26.3694	25.9118	25.7663	26.092	26.2902	26.0025	25.3157	25.0835	25.9794	25.7972	26.6903	25.9368	25.0313	26.0146	26.1895	26.3601	26.1805	25.9893	26.5649	24.5609	25.6405	26.4441	25.2624	25.2622	26.231	25.5536	25.7267	25.3169	26.4946				14	14	14	47.9	47.9	47.9	52.384	0	323.31	2631100000	300
27.1654	27.5503	26.8103	26.8769	27.3342	26.4546	26.9861	27.1987	26.611	27.221	26.9732	27.1626	27.2279	26.835	27.5431	26.8182	26.8553	26.5205	27.3615	27.4967	27.3676	27.4374	27.5655	27.055	27.4876	27.5841	27.4472	27.1601	27.3782	27.1056	27.1959	27.62	27.1937	27.4521	26.6327	27.8526				20	20	20	54.2	54.2	54.2	59.67	0	323.31	7822800000	551
25.2905	24.9623	24.9643	25.7377	25.1305	25.0554	25.2702	25.5015	24.55	24.4912	24.7015	24.1736	24.7211	24.3814	23.8982	25.0042	24.8043	25.7957	25.16	24.22	24.2452	25.0074	25.3498	25.3595	24.6717	25.1364	24.0175	24.7266	25.7185	24.0086	24.0051	24.6178	24.6505	24.5453	25.6742	25.6656				9	9	9	19.4	19.4	19.4	81.742	0	323.31	1522200000	147
23.9869	24.3915	22.6999	25.0494	24.32	23.6794	24.4598	23.8094	23.7791	23.1798	24.3653	24.5393	23.1845	24.5011	23.0802	25.2185	22.7064	23.5316	23.7916	23.2654	24.4803	23.6093	24.6459	23.8938	24.6844	23.402	23.8437	23.4085	23.8849	23.5439	23.4375	23.854	24.191	24.5456	24.1487	25.2098				4	4	2	16.9	16.9	7.5	60.966	0	323.31	927570000	100
25.5191	25.2967	24.0652	25.5215	24.4357	24.4573	23.7897	24.9438	22.8596	24.5254	24.4395	24.4964	23.7455	24.0293	25.0715	24.0175	23.3253	24.4549	25.324	24.3027	24.2046	25.1004	25.2856	25.0343	24.3939	24.6154	24.0144	24.6443	24.5839	24.1932	24.2548	25.4179	24.3846	24.7913	23.4349	23.5681				10	10	10	38.1	38.1	38.1	48.804	0	291.17	1041600000	115
27.045	27.6417	27.3597	27.8397	28.0237	27.738	27.7102	27.4389	27.0091	27.5686	27.3449	27.8033	28.1823	27.5458	28.2908	27.1729	27.9016	27.6158	27.1782	27.6034	27.6614	27.3614	27.8429	27.3534	27.3404	27.9129	27.8038	26.7093	27.1197	27.0155	27.6106	27.5562	27.4845	27.0536	27.5542	28.4597				42	42	42	27.7	27.7	27.7	273.42	0	323.31	8627100000	740
25.0525	26.2557	25.0144	25.0503	24.8519	24.9421	25.0816	25.2483	25.1047	24.9865	24.7234	24.8615	25.3726	24.9733	24.9411	26.5952	25.0823	25.1721	24.9029	24.2758	25.0495	24.97	25.0898	24.6662	24.7742	24.5596	24.6577	24.9646	25.091	24.6537	24.3531	25.1155	24.5978	24.953	24.7846	24.6622				10	10	10	33	33	33	44.408	0	323.31	1527000000	183
28.2454	28.4071	28.4852	28.7577	28.7709	28.1077	28.5002	28.2585	27.8831	28.7551	27.9861	28.8573	28.4565	28.455	28.7509	27.5589	27.9152	28.3791	28.7655	28.4353	28.3145	28.7767	28.6026	28.341	28.7857	28.9528	28.7949	28.5053	28.4229	28.4491	28.6226	29.0024	28.034	28.5689	27.7962	28.6582				16	16	16	44	44	44	60.533	0	175.51	14980000000	468
25.0853	25.5176	28.0101	25.7745	25.7116	27.4142	27.3765	26.7124	26.2734	26.6003	27.5722	27.2322	27.5131	27.6081	28.1237	25.9314	27.2544	26.203	25.7587	27.7214	27.174	26.9315	25.9399	26.2986	25.9959	24.9641	27.7967	27.6361	24.7822	27.4928	27.2874	25.9815	27.5406	26.5829	27.0794	25.8802				13	13	13	32.3	32.3	32.3	49.541	0	323.31	5747200000	279
26.6374	26.4381	25.8297	26.1086	25.9161	26.3985	26.1821	26.1413	26.0281	26.6382	26.21	26.231	26.6023	26.0536	26.3314	26.8348	26.1554	26.0963	26.0024	26.2294	26.6671	26.6608	26.4723	25.1908	26.6614	26.8588	26.5822	26.4732	26.2578	26.4437	26.4386	26.6895	26.6367	26.5419	27.021	27.1907				24	24	24	44.7	44.7	44.7	106.81	0	323.31	3684400000	483
25.0788	25.4363	25.0401	25.3251	25.3649	25.0341	25.2317	24.9606	25.2224	25.0847	24.8846	25.4087	25.3815	24.4713	25.273	24.7446	25.0166	25.7484	25.2825	25.05	24.9651	25.4721	25.5301	25.0057	25.1878	25.775	25.1247	24.7862	25.5755	24.857	25.3576	25.4709	25.518	25.3431	25.5681	25.4405				10	10	10	17.5	17.5	17.5	82.845	0	80.772	1518500000	193
26.2949	26.6561	26.3966	26.3929	26.4647	26.3204	26.2433	26.3794	25.5093	26.4569	25.7561	26.0547	26.6858	25.7534	26.2604	25.863	26.3886	26.4078	26.3666	25.9332	26.0539	26.7153	26.5526	26.4851	26.1635	26.7015	26.2329	26.4773	26.3761	26.0341	26.2908	26.8883	25.9527	26.3967	26.277	26.3954				17	17	17	36	36	36	58.777	0	323.31	3391700000	272
25.9108	25.628	25.7565	25.6092	25.7405	26.0893	26.1215	25.7223	26.3897	25.3336	25.5544	25.4168	26.308	25.9584	25.492	26.2946	24.9213	25.8425	25.8573	24.9372	25.9358	26.1485	25.93	25.9897	25.898	26.7981	25.1511	25.611	25.9996	25.3542	25.2064	26.2058	25.6595	25.8073	25.7217	26.6335				12	12	12	55.9	55.9	55.9	49.83	0	323.31	2698100000	226
28.2022	27.9798	27.891	27.7341	28.0975	28.1309	27.5836	28.4727	27.4425	27.4104	27.0189	26.9911	27.5021	26.4628	27.0395	27.8181	26.4658	28.7873	27.9826	28.1406	26.5489	28.0603	27.4722	28.1556	27.6209	28.8972	26.7322	27.86	28.3634	26.6816	27.1224	27.6164	26.555	27.2947	28.4725	28.3575				6	6	6	34.6	34.6	34.6	22.949	0	323.31	10506000000	335
28.6368	28.1092	27.4165	27.7824	27.4887	27.8892	28.1378	27.2954	27.6321	27.8298	27.4597	27.4589	27.4253	27.1825	27.2134	26.7802	27.6794	28.4239	28.1349	27.5987	27.1981	26.5961	27.3491	28.0289	27.6167	28.4174	26.7154	27.7779	28.2754	26.7539	26.8232	27.2697	27.5797	28.2957	27.9275	27.7221				6	6	6	57.7	57.7	57.7	22.836	0	173.29	10270000000	335
24.1966	24.3972	24.1396	25.3392	24.8427	24.1966	22.8706	24.3279	22.084	25.3916	23.8192	25.0801	24.402	23.2745	24.2173	22.395	23.1824	24.5407	25.1038	25.1474	24.4925	24.9338	26.3511	24.4995	24.6259	23.5804	24.8456	24.062	24.7258	24.8354	24.8094	25.6824	23.9439	25.1838	24.4628	24.7029				20	20	20	33.7	33.7	33.7	101.89	0	129.64	1035100000	198
24.248	24.9608	26.5822	25.2985	25.3705	27.0767	25.6964	25.5356	25.4842	25.3076	25.7678	25.4907	25.4276	26.6512	26.2489	25.598	25.9447	25.4138	24.9765	26.8856	25.5664	25.6857	24.2197	25.5541	24.6665	22.8215	26.3056	25.7491	23.922	26.35	26.5126	23.4801	26.0218	25.5571	26.0569	24.4104				15	15	15	37.2	37.2	37.2	72.926	0	323.31	2368700000	229
24.6531	25.0697	25.5612	24.747	24.2311	26.3513	24.9786	24.7639	24.0875	25.0676	24.4967	24.7379	24.7878	23.9863	24.8483	24.3213	24.0182	24.6736	25.1308	25.3195	25.1607	25.1909	24.7095	25.8115	24.1948	23.6855	24.2383	24.8026	25.7502	24.4842	24.9086	24.971	24.6369	24.7822	24.9534	23.9055				4	4	4	54.8	54.8	54.8	13.802	0	39.137	1301500000	71
24.9069	24.9974	24.2037	25.3572	24.9213	24.3435	25.0247	24.5696	24.107	24.9661	24.678	24.7663	25.0187	23.6455	24.8127	24.7494	24.8216	25.1746	24.8798	24.3857	24.4009	24.8571	24.9582	25.296	24.6772	25.3272	24.5547	24.9238	24.9933	24.3844	24.3782	25.0072	24.3633	24.307	24.2929	25.0935				9	9	3	39.5	39.5	12.2	42.91	0	78.442	1162600000	142
22.8699	25.2111	23.7895	24.618	24.264	24.4585	24.2169	24.2199	23.313	24.7972	24.1492	24.6044	24.129	23.993	23.3728	24.5405	23.9649	23.6984	24.0689	24.2383	25.3148	24.1201	24.6001	24.279	24.4551	23.8567	24.4984	24.0242	24.3546	24.023	24.3864	24.3977	24.2183	24.0238	24.3994	24.7417				7	7	7	15.7	15.7	15.7	76.715	0	58.237	849490000	111
22.0653	25.8033	24.3215	23.7273	23.6846	23.5672	23.1657	23.479	22.3104	23.3649	23.1578	23.4914	22.6756	22.1257	23.7967	23.238	25.3197	23.5291	23.8822	23.7192	23.2003	23.0347	23.1876	23.4497	23.9244	23.6191	23.6504	23.5023	22.7796	22.8087	23.529	23.8154	24.4216	23.5123	22.9614	22.8979				9	9	9	19.3	19.3	19.3	77.641	0	160.45	631080000	129
28.9506	28.7837	29.0762	28.6888	28.2881	28.6727	28.3654	29.1641	28.6671	29.0971	28.8208	28.7563	29.2536	28.987	29.4799	28.8251	28.5558	28.7583	28.7823	28.7312	28.4017	28.8972	29.1191	28.8703	28.4762	29.1524	29.0156	28.9979	28.9778	28.8494	28.8404	29.0026	28.6962	28.992	28.6971	28.9052				23	23	15	62.2	62.2	42.5	50.663	0	323.31	22002000000	909
29.1123	29.2782	28.8093	28.9238	29.1061	28.9267	28.1736	29.3774	27.3378	28.8603	27.8261	28.358	28.7458	27.1769	28.9233	27.8148	27.7471	29.0781	28.9501	28.663	28.2089	29.099	28.7985	29.0328	29.0775	28.7981	27.2592	29.175	29.7318	28.5416	28.3939	29.54	27.8667	29.0618	28.1883	28.1627				17	17	15	60.9	60.9	55.1	42.403	0	323.31	18867000000	724
26.6022	25.7498	26.5043	27.9168	26.8376	27.5187	27.4457	26.3334	29.7538	27.4583	28.9293	28.0435	28.0959	30.5163	27.5383	27.6611	29.3714	26.0154	26.4441	26.9924	29.4997	26.828	26.6475	25.7513	27.3865	25.2777	30.8673	26.2952	25.9625	28.2659	28.5575	25.6862	29.9879	26.9411	28.625	28.0705				15	15	15	53.1	53.1	53.1	46.44	0	323.31	14560000000	500
27.0885	25.1586	25.6143	26.5642	26.5453	25.6996	26.4317	26.6231	26.1088	26.9846	26.3839	26.1529	26.7183	27.7875	26.2541	25.6801	26.2824	26.2274	26.1355	26.0476	26.0844	26.4482	26.9335	26.5942	26.3217	26.0375	26.3552	26.5786	26.5751	26.4229	26.3928	26.9691	25.6073	26.5728	25.5954	26.7783				5	5	5	17.9	17.9	17.9	41.331	0	163.51	3748100000	101
24.6973	26.6867	25.5571	25.2238	26.0798	25.2954	25.1633	24.9804	25.564	24.8158	24.8351	24.2294	26.3925	25.3331	24.9703	27.3604	25.3288	25.1444	25.6004	24.5473	24.9658	25.3364	24.4339	25.4722	25.3665	24.8808	24.8672	25.3236	25.0835	24.2625	24.7508	24.3437	24.9905	24.642	25.4534	26.3847				5	5	5	14.5	14.5	14.5	39.829	0	323.31	2351200000	266
23.7524	24.7281	24.714	24.6109	24.4289	22.5975	23.9361	23.8198	23.4151	24.9791	23.7205	24.9239	23.6506	24.2309	25.0971	23.6528	22.143	24.5879	24.6686	24.5163	24.0988	24.886	24.6454	24.3632	24.9044	24.7931	23.366	25.3761	22.4637	24.5364	24.0398	25.1571	24.179	24.2419	23.5974	23.6041				6	6	6	27.6	27.6	27.6	37.79	0	65.26	895160000	64
23.3013	24.5843	24.8563	24.1809	24.6943	22.53	22.1839	23.5723	22.9493	24.7063	22.7976	24.8405	22.3633	22.5182	24.8439	23.6977	23.8183	24.3681	24.9304	24.3839	24.122	25.558	24.1309	23.455	25.1637	26.1443	23.7255	23.3982	23.7791	24.5692	24.5798	24.9026	23.9317	25.1534	21.5227	23.7997				17	17	15	10.1	10.1	9.1	319.1	0	323.31	804050000	143
27.3394	27.8899	27.8785	27.8491	27.7645	27.4006	27.5012	27.6049	26.4493	27.4602	27.1038	27.7025	27.1669	27.1744	27.8345	27.0715	26.889	27.7596	27.8247	27.5766	27.0746	27.5101	27.6095	27.3372	27.5872	27.7591	27.3999	27.5609	27.4466	27.393	27.6549	27.7847	27.1813	27.5196	27.2293	27.7846				19	19	19	50.5	50.5	50.5	59.62	0	323.31	7542000000	383
28.3684	28.6648	28.47	28.2912	28.2235	28.0014	27.8922	28.3261	27.3498	28.3375	27.7372	28.141	27.9162	28.1273	28.6049	27.8875	27.9877	28.3634	28.2478	28.4296	27.7159	28.2596	28.6374	28.1853	28.0173	28.8441	28.195	28.3541	28.3132	28.176	28.2509	28.4571	27.9524	28.5362	27.808	28.7494				17	17	17	50.1	50.1	50.1	57.924	0	323.31	13051000000	497
27.5788	26.9346	27.2567	27.2013	26.8656	26.0947	27.0313	27.214	26.9982	27.3389	26.8778	27.2893	26.4411	27.1813	27.7076	27.0911	26.0745	26.732	27.1891	27.3396	26.5611	27.2879	27.6272	27.3185	26.961	27.4351	26.9861	27.5965	27.2921	26.9663	27.1341	27.7071	27.0066	27.6055	27.0276	27.1597				11	11	11	25.6	25.6	25.6	51.242	0	323.31	5977700000	324
26.969	26.3625	27.455	27.2613	27.0695	27.3278	27.666	27.2637	26.9615	26.6939	27.1057	26.8415	27.2769	27.6066	27.0855	26.5107	26.6421	26.9905	27.2043	26.8249	26.8288	26.772	26.9957	27.4229	26.245	26.8002	27.0689	27.0576	27.2905	26.3712	27.0235	27.0342	26.2068	26.7451	26.9739	26.9224				6	6	4	43.1	43.1	32.9	23.482	0	323.31	5600400000	284
28.0765	27.3535	27.4737	27.8643	27.2563	28.0345	28.1353	28.3745	27.6534	27.4643	27.6644	27.498	27.9076	27.9681	27.7784	27.0076	27.2363	28.0671	27.6645	27.8598	27.2201	27.6619	27.6882	27.8257	27.0772	27.1882	27.4291	27.7561	27.945	27.311	27.5587	27.5649	27.3156	27.4532	27.7633	27.5739				11	11	11	60.9	60.9	60.9	23.489	0	323.31	9537400000	479
25.9303	26.4033	26.1994	26.7137	26.806	26.1075	26.9682	24.6321	26.7891	26.4826	26.3039	26.3476	26.6054	27.0039	26.5428	26.3756	25.8629	26.6588	26.3909	26.1951	26.1008	26.1951	26.2066	26.259	26.6399	26.5777	26.3046	26.2624	26.4339	26.5012	26.2522	26.4376	26.1636	26.4793	26.5234	26.5832				11	11	11	43.4	43.4	43.4	42.272	0	323.31	3551700000	225
26.1064	25.9196	26.0556	27.0651	26.5722	26.4353	27.2378	26.2889	26.7838	25.4326	26.7701	25.9558	26.2524	26.4053	24.6055	26.2337	26.7818	27.0336	26.0692	26.3236	26.9252	26.2924	25.9858	26.4003	26.5109	25.9811	26.4851	25.9298	26.0832	26.0527	25.9108	25.8379	26.5131	25.9069	26.5416	26.9053				3	3	3	24.9	24.9	24.9	18.998	0	212.45	3778900000	224
25.8822	23.6243	26.9919	26.1777	26.2953	27.2957	27.7351	26.623	25.9645	26.2042	26.7057	26.2332	26.4605	26.98	26.2055	25.3524	26.2697	26.5965	26.3606	27.7292	26.3404	26.1803	26.1932	26.048	26.22	24.8959	26.8515	26.3756	25.8174	26.2101	26.5381	25.5165	26.016	26.1744	26.5606	26.2207				14	14	14	33.2	33.2	33.2	79.685	0	159.36	3462300000	233
23.8683	23.9321	23.6037	23.8341	23.4353	24.157	22.9947	24.1671	23.6512	23.6668	23.0522	23.7809	23.2584	23.3802	23.9807	25.2145	22.9074	23.8383	23.3733	23.9756	23.4468	23.7183	24.1444	23.5303	23.2472	23.2177	24.0218	23.8085	24.2394	23.264	23.8571	24.2708	23.3651	24.4253	23.6524	23.8922				4	4	4	20.7	20.7	20.7	37.025	0	47.292	612990000	117
23.2226	24.0962	22.1746	24.0072	24.8158	23.4149	23.7944	23.878	23.4274	24.6549	23.9476	25.1905	23.619	23.4722	23.8934	24.8186	23.8587	24.6952	24.5341	24.1011	24.072	24.7426	24.8896	23.842	24.5299	24.7652	23.9051	24.0488	24.3922	24.3596	24.7461	24.7421	24.4356	24.0897	23.5394	24.5842				10	3	3	16.9	7.6	7.6	89.865	0	302.47	833210000	88
23.5107	25.8348	25.3861	24.973	24.2389	24.2132	22.7854	23.8668	23.6956	25.0841	22.9666	25.0852	24.7414	23.7101	25.6006	24.2761	21.4251	23.5614	23.2429	25.1672	22.9984	24.9323	24.8172	24.4282	25.1519	25.3261	24.3592	24.6947	24.7301	24.3573	24.5612	25.3358	23.1738	24.8462	23.7338	24.4842				8	8	6	14.1	14.1	10.7	83.735	0	102.63	963860000	152
26.2394	25.9428	26.1725	27.7816	26.0243	28.6917	28.1526	25.7606	31.3895	30.0145	31.0981	28.8789	29.1853	30.1365	29.2181	30.9925	30.8022	25.406	26.8486	26.4572	30.4094	27.8095	27.0562	24.031	28.9598	26.5826	29.9806	27.8138	27.5808	30.7216	29.1095	25.0991	31.2866	29.0572	29.3605	26.645				10	10	10	29.3	29.3	29.3	38.429	0	323.31	32397000000	499
27.6965	28.5807	28.54	27.8933	26.5968	27.682	27.7425	28.1569	26.7818	28.2199	27.2571	27.5285	27.3699	27.6619	28.8195	27.0799	26.7365	27.2889	28.0151	28.1106	27.1652	27.2841	27.8171	28.5815	27.7514	26.0782	28.1006	28.7577	27.7792	28.0924	28.0589	27.7206	27.3782	27.8302	27.9071	26.2407				11	11	11	25.9	25.9	25.9	39.594	0	323.31	10165000000	391
27.7303	27.4494	27.4649	28.3536	27.3385	28.3201	28.1593	28.7992	28.8263	27.6387	28.0252	27.8983	27.8747	28.7391	27.8761	28.411	27.5748	27.5881	27.2499	28.4837	27.7017	27.0407	28.4499	27.4983	27.5779	27.4033	28.5886	27.4898	28.525	27.8225	27.8813	27.5322	27.9431	27.7081	28.6588	29.036				15	15	15	49.1	49.1	49.1	53.139	0	323.31	11415000000	431
29.0879	29.4185	29.8941	29.6377	29.2242	28.9368	29.1623	29.0057	28.3253	29.4201	28.5518	29.2679	28.8271	28.7558	29.6023	28.6957	28.7352	28.4102	29.3934	29.4565	29.1587	29.2641	29.1104	29.3373	29.5682	29.4306	29.2664	29.2729	29.5245	29.0911	29.2431	29.6168	28.716	29.1836	29.0541	28.9591				18	18	18	41.8	41.8	41.8	73.62	0	323.31	27726000000	855
24.8106	24.228	23.7685	24.2296	24.8032	24.2549	24.5921	24.2288	24.0181	24.7161	24.432	24.5174	23.9898	24.0133	24.4022	24.6229	24.0233	24.5206	24.8456	24.0208	25.6593	24.6797	24.9772	24.6626	24.4253	25.2058	24.7844	24.4764	24.7198	24.4964	24.6338	24.1517	22.8869	24.5912	24.4261	24.486				9	9	9	23.7	23.7	23.7	66.316	0	310.55	940980000	164
26.6403	25.8469	24.8265	25.705	27.8713	26.1833	25.9713	25.8102	25.4287	25.9578	25.5964	26.7165	25.0752	24.9039	24.728	24.6741	25.5172	25.1817	26.3895	24.4189	26.9648	27.9671	25.9731	26.7964	25.8695	26.0714	25.0398	25.4762	26.2218	25.7702	24.8752	26.8686	25.518	26.6174	25.1443	26.3091				5	5	5	46.7	46.7	46.7	17.143	0	107.01	2746600000	72
25.2576	24.4646	25.2104	24.8821	23.6131	23.9344	24.5643	23.8014	23.6184	24.0483	23.6652	22.9617	23.4574	23.6285	24.7777	23.9063	22.7526	23.6712	25.2361	24.2505	24.1504	24.654	24.5405	24.5398	23.9623	23.7881	22.8391	24.5223	25.1261	24.1752	24.0705	24.1463	23.091	24.8868	24.0997	24.3243				3	3	3	49.6	49.6	49.6	13.092	0	76.139	875910000	94
29.4698	28.7679	28.2563	28.7846	28.2386	28.936	28.8972	29.6372	28.7362	29.0353	28.7249	28.3504	29.4495	28.3528	28.7448	28.4715	27.7679	29.1818	29.2763	28.8393	28.36	29.1289	29.4034	29.3712	28.998	29.1572	28.2705	29.1392	29.4413	28.4388	28.6125	29.3304	27.0928	29.2435	28.9664	28.9619				7	7	7	58.8	58.8	58.8	23.207	0	323.31	19781000000	238
28.9186	28.6135	28.529	28.9805	28.0647	28.1787	28.6078	29.3218	28.1206	29.1858	28.5642	29.2167	29.4128	28.0887	29.0338	29.0915	27.5869	29.0426	29.4569	28.1522	27.9254	29.2184	29.0744	29.1918	28.5969	29.5504	28.408	28.8375	28.8082	28.8763	28.6474	29.517	28.4999	28.8469	29.0333	27.9626				7	7	7	45.8	45.8	45.8	22.988	0	160.99	23395000000	307
27.2975	27.4986	27.63	27.5863	27.223	27.0226	27.6382	27	26.5389	27.2874	27.081	27.3074	26.7871	26.4193	27.1391	26.9821	26.627	27.3696	27.6065	27.9658	26.7447	27.0072	27.5162	27.96	27.5508	27.44	26.9832	27.2988	27.1857	26.9457	26.8478	27.3707	26.0214	27.0792	27.2548	26.5204				10	9	9	39.5	35.4	35.4	45.671	0	323.31	7136500000	406
22.9656	22.8693	24.1631	23.8412	23.4054	25.4319	24.6551	25.1981	23.3906	23.8618	23.6712	23.8259	25.2493	23.6709	24.9825	23.9612	24.8631	24.4475	24.5552	25.0797	23.7647	24.2924	24.0555	24.5163	23.6532	23.7804	24.2914	23.858	24.1224	24.4604	24.1652	23.924	24.0616	24.5005	24.0184	24.1448				9	9	9	17.9	17.9	17.9	97.915	0	136.73	841010000	141
24.714	27.0716	24.6276	24.3989	24.7582	24.2246	24.4831	24.0906	23.8573	23.868	24.1063	23.6061	23.6785	23.3258	23.1649	25.4678	25.5483	24.7829	24.8961	23.4732	25.1229	25.1466	24.3455	25.0456	24.2716	24.6452	23.25	24.1507	24.876	23.2574	23.0259	24.1322	23.4912	21.6226	24.3193	24.8638				2	2	2	7.4	7.4	7.4	41.513	0	65.753	1337200000	133
26.9654	25.8778	23.7182	26.3423	26.6938	27.6075	27.6761	27.2456	28.5435	25.7406	26.6683	27.1148	27.8849	28.075	26.2863	27.5035	26.5155	27.4642	25.9315	27.3477	26.5043	25.5456	26.5855	26.8902	26.6424	25.2185	26.8709	26.0253	27.0454	25.4643	25.9498	25.7259	26.2578	25.9099	27.8227	28.1895				22	22	19	37.4	37.4	33.8	99.024	0	323.31	5265700000	438
29.1045	28.0903	28.449	28.5266	28.1298	27.634	28.2178	28.9961	27.9365	28.4801	28.3052	28.1144	27.9998	27.7313	28.8648	27.5062	27.1215	28.7564	28.6648	27.813	27.858	28.1696	28.2501	28.3504	28.2122	28.7525	27.8343	28.4444	28.3928	27.958	27.9771	28.6947	27.696	28.4576	28.424	28.1573				8	7	7	47.6	44.1	44.1	32.922	0	323.31	13824000000	309
27.2768	26.3192	26.3936	26.655	26.6633	27.6507	27.1468	27.0791	26.8592	26.5843	27.1531	26.8654	27.7404	26.8612	26.1167	27.2959	26.3833	27.7677	26.3959	26.8451	26.4123	26.7268	26.973	26.9257	26.2986	25.7663	25.8691	26.5988	27.4596	26.464	26.4092	26.5462	26.2623	26.4701	27.3268	26.9352				9	9	9	52.7	52.7	52.7	33.428	0	223.41	4915600000	232
25.9606	26.5102	26.8896	26.4435	26.3425	25.8398	26.1807	26.3034	25.657	26.2945	26.4335	26.823	26.582	26.3796	26.5181	26.0387	25.0578	26.3539	26.512	26.7371	26.477	26.2181	26.2545	25.9368	26.6415	26.7925	26.5365	26.0067	26.1923	26.3773	26.2651	26.6209	26.26	26.4069	26.7462	26.9333				25	25	25	33.5	33.5	33.5	120.84	0	323.31	3562500000	388
23.7273	25.4687	25.5107	24.8038	25.9042	26.2723	25.8405	25.1129	25.6754	26.064	25.9506	26.0946	25.502	26.0132	25.9184	25.9682	25.9774	25.1785	24.7755	26.5774	26.5599	26.0385	25.442	23.6218	25.8491	25.6955	27.474	26.0562	24.6778	26.4726	26.0845	25.0012	26.5447	26.1051	26.2897	25.9792				24	24	24	41.4	41.4	41.4	107.14	0	323.31	3034500000	254
24.4167	25.7854	26.8548	25.5827	26.1418	26.3579	26.3942	26.0309	26.4243	26.5051	26.6996	26.7441	26.2836	26.8708	26.8567	26.5345	26.4357	25.9689	26.021	27.2086	26.6043	26.3754	25.9579	25.8823	26.4985	26.131	27.7286	26.3794	25.8953	27.0086	27.0936	26.2277	26.9914	26.3009	26.4282	25.9455				27	27	27	31.3	31.3	31.3	138.34	0	323.31	3909400000	395
29.5279	27.1605	26.4235	28.731	27.8569	27.9269	29.4309	28.2391	28.5896	27.1178	28.5955	27.4678	26.5676	28.1562	25.7867	27.5537	25.0454	28.1699	26.7132	27.3967	28.0308	26.4463	27.4745	27.8985	26.908	26.7666	26.3512	26.7945	27.1718	26.6299	24.7627	26.2022	26.9976	27.2839	27.6689	27.3073				11	11	11	38.4	38.4	38.4	51.853	0	323.31	8736300000	359
23.1204	24.0846	23.61	22.887	23.6361	21.4973	22.9898	23.44	23.2458	23.6589	23.3807	23.9702	22.4809	23.3983	23.109	25.1521	23.1399	23.0116	22.9838	23.6217	23.4777	23.7708	23.1804	23.8908	23.8471	23.4291	23.2908	23.7876	23.1204	23.6138	23.063	23.5551	23.3878	23.8306	23.5476	23.3229				5	5	5	24.5	24.5	24.5	36.622	0	122.74	512210000	100
24.3855	25.2182	25.3542	24.3631	25.7224	24.6531	24.8775	24.8844	23.7658	24.8117	25.2681	25.7751	24.8108	24.4892	25.2208	25.1317	25.618	24.3711	24.9577	24.8225	25.1253	26.3171	23.8016	24.4112	24.882	24.9001	25.3866	24.9707	24.0844	25.4259	25.0123	25.1618	25.2628	25.1377	24.3777	24.5577				12	12	12	17.8	17.8	17.8	118.32	0	323.31	1556500000	180
28.0853	27.7485	27.3293	28.1356	27.6114	27.6329	25.3699	28.4514	26.8717	27.6831	27.3294	28.0915	27.6241	27.4492	28.6603	25.834	26.325	28.3201	27.8321	27.4692	26.4912	28.2336	28.4593	28.069	27.4765	26.7008	27.5285	28.7512	28.1688	27.9507	27.9306	28.0233	27.0572	27.9044	26.7874	25.6244				6	6	6	37.8	37.8	37.8	14.395	0	302.22	9240500000	182
25.2726	24.9309	25.6132	25.4501	25.0341	25.8148	25.1986	25.0649	25.3285	25.4565	24.4784	25.9365	25.3454	25.2362	25.4009	24.1263	25.3331	25.5273	25.6076	25.7268	25.5707	25.2967	25.5494	24.756	25.5727	25.5015	25.8233	25.0515	24.9105	25.2986	25.4849	25.9287	25.4113	25.4202	25.3161	25.7096				18	18	18	34.7	34.7	34.7	75.378	0	110.93	1764300000	251
24.8055	25.0251	25.4552	25.2815	25.069	25.305	24.8033	25.1779	25.0435	25.5418	24.2831	25.6538	25.1952	24.8355	25.5955	24.8005	24.3145	25.6509	25.657	25.2443	25.2115	25.8167	25.4538	25.2772	25.3098	25.5569	25.1423	25.0683	25.4334	25.2649	25.4181	25.5092	25.1078	25.6772	24.7742	25.466				10	10	10	30.1	30.1	30.1	52.385	0	276.44	1761500000	176
27.256	26.6262	25.615	26.1366	26.7814	26.2238	26.2941	26.3757	26.8974	26.3248	26.4949	26.203	26.4237	26.0775	25.9193	26.7575	25.8756	26.0087	26.3699	25.8282	26.3739	26.2306	26.6475	26.3132	26.3785	26.5428	25.8424	26.2919	26.4465	26.3837	25.5013	26.4791	26.2898	26.3449	26.5516	26.9513				7	7	7	37.9	37.9	37.9	43.171	0	234.18	3926300000	342
27.2113	25.7847	27.0205	26.3011	26.0575	26.5502	26.6857	26.6956	26.4111	26.5485	26.9568	25.1395	27.2898	26.3945	27.1147	26.5914	27.2822	26.1447	25.8384	27.3473	26.5833	26.9528	26.2871	26.487	25.7965	26.0102	26.6634	26.4637	26.9792	26.4344	26.1878	26.1603	26.2958	26.2678	26.8822	26.9515				9	9	9	58.2	58.2	58.2	25.614	0	323.31	4086700000	246
23.8929	24.2765	24.2181	24.6706	24.4266	24.5197	24.5614	25.1518	23.8179	23.7143	23.703	24.459	24.0831	24.7483	25.1318	23.6046	22.4009	24.3359	23.6339	25.1236	23.5751	23.1274	24.2889	24.2426	24.3884	23.9619	24.4616	24.2065	24.3234	22.8279	22.5242	23.9909	23.4035	23.7171	24.8103	24.6232				7	7	7	30.5	30.5	30.5	33.232	0	68.505	736240000	107
24.4752	26.7013	25.0425	24.7844	25.1655	25.3724	24.2069	24.8652	24.5038	25.3282	23.2434	25.0713	25.1423	25.3872	25.222	24.5758	24.7423	24.7751	24.744	25.0181	24.4135	25.6485	24.9241	24.6855	25.0146	25.0944	25.8493	25.039	24.5918	25.0851	24.9678	25.426	25.1031	25.1547	24.762	25.1516				6	6	6	19.5	19.5	19.5	49.222	0	14.666	1395000000	125
25.4441	25.0881	23.8434	25.028	25.7028	25.1115	24.6038	25.3957	24.7709	23.9984	24.5368	24.8243	24.8437	24.0126	24.271	22.1275	24.4659	24.2904	25.7081	24.5121	24.9619	25.2216	25.1913	24.4716	25.1561	25.3288	24.5897	24.9044	25.3819	24.2916	24.514	25.4763	24.7131	24.9012	24.8601	24.6883				4	4	4	18.8	18.8	18.8	40.736	0	323.31	1169900000	119
32.2177	30.5953	33.2984	31.439	31.1217	31.783	31.6173	32.7256	31.7149	32.9381	31.6891	33.0026	32.1024	33.0009	32.0615	32.3434	32.2732	29.516	33.3197	32.6188	32.6114	34.7924	32.3733	32.9721	32.4018	32.6944	32.5221	33.3267	32.2062	32.6442	32.0313	33.1903	31.979	33.1037	33.1285	32.6459				21	21	21	34	34	34	107.78	0	323.31	245070000000	305
30.3043	30.4755	29.8595	30.2057	30.6369	29.9875	30.0189	30.0201	29.4629	30.2208	29.8122	30.2865	30.0346	29.6355	29.8688	29.8727	29.6296	30.2548	30.4246	29.8865	29.8715	30.2815	30.0439	30.0161	29.9675	30.404	30.079	29.9644	29.9559	29.9489	29.9549	30.5376	29.8565	30.2367	30.2641	30.1278				36	36	36	67	67	67	89.321	0	323.31	53012000000	2162
23.5798	24.4769	24.8202	24.1942	25.2685	24.1119	24.3005	25.371	23.5237	24.7329	23.517	23.7175	25.714	22.956	25.6284	24.0577	22.2349	24.2092	25.2545	25.545	25.0315	24.5706	24.2757	24.4389	25.3886	25.4604	24.4599	24.6096	24.1007	24.8675	24.9031	25.6896	24.1765	24.8304	24.5384	23.1403				19	19	19	30.8	30.8	30.8	122.48	0	323.31	1102200000	210
26.0922	25.4287	26.1327	25.6953	26.2731	25.7632	25.2728	25.8875	25.1015	26.6102	25.3904	27.2542	25.56	25.1769	26.3326	25.2695	26.0082	25.904	25.9789	26.197	26.3893	25.9958	26.8477	25.8809	26.2229	26.2109	26.0912	25.7654	26.0473	25.9595	26.0119	26.5698	26.087	26.9382	26.0414	26.1606				12	12	4	64.1	64.1	25	42.761	0	196.12	4088200000	224
23.1334	25.2399	24.7713	25.0222	25.0317	24.8895	24.5529	24.3494	23.9569	24.3876	24.3522	24.9404	24.2084	24.4814	24.6413	24.2701	24.4154	24.2667	23.9608	25.2298	24.2864	24.2526	24.6905	25.1122	25.0256	24.8	24.5553	24.8096	24.4882	25.314	25.2336	25.0299	24.7655	25.0359	24.6956	23.4608				9	9	9	16.4	16.4	16.4	103.64	0	300.07	1126600000	179
24.4927	26.1609	25.2814	25.2697	24.8751	24.1996	25.624	23.7616	23.7079	24.9159	24.7578	24.2553	24.2598	23.1647	24.8243	26.2272	24.4942	24.1358	26.0584	24.2301	24.3366	25.0383	23.79	24.9588	23.8201	25.6312	24.0347	25.1783	23.2544	24.1543	23.8554	25.1478	24.5606	24.1165	24.4363	24.6644				7	7	7	64.1	64.1	64.1	19.863	0	185.37	1189100000	87
25.1618	23.2277	24.3809	25.2409	24.4057	24.4211	24.8268	24.156	25.0653	25.0641	25.0242	25.5658	25.3917	25.4061	24.7632	24.1757	24.172	25.4338	24.9719	23.9727	25.1783	22.2151	24.7328	24.679	24.8945	24.8965	24.3614	24.749	24.7763	25.0878	24.18	25.6673	25.6479	25.2951	25.5096	24.8169				4	4	4	25.2	25.2	25.2	35.54	0	43.785	1808800000	174
27.6913	27.8579	27.3731	27.5363	27.4292	27.543	27.2657	27.6217	27.5201	27.6729	27.2457	27.8975	27.5436	27.2429	27.5885	27.0717	27.3758	27.883	27.5964	27.3305	27.3786	28.0554	27.7437	27.2431	27.4741	28.0362	27.2564	27.108	27.7593	27.3853	27.5444	27.8741	27.1138	27.8096	27.0417	27.8849				27	27	27	43.4	43.4	43.4	103.28	0	323.31	8071800000	602
25.0161	25.3995	25.885	25.4833	25.1474	25.109	25.0247	24.2215	24.3483	23.6105	24.9344	25.4016	24.9573	24.7818	24.8521	25.2571	24.1363	24.4079	25.3214	25.3284	25.9543	24.9475	24.8879	25.6147	25.1533	25.0542	25.2419	25.4799	25.2401	24.5199	25.2093	25.6874	25.7599	25.5719	25.4247	24.6766				9	7	7	32.3	25.6	25.6	49.263	0	86.717	1713600000	151
26.3465	26.2487	26.2819	26.4237	26.9552	25.8355	26.0923	25.9609	25.5153	26.3011	25.5738	25.7277	25.6111	25.9972	26.0573	25.8172	25.0829	26.3918	26.3947	26.3478	26.6006	26.3185	26.4325	26.3063	26.626	27.2036	25.8678	26.2318	26.2076	26.2405	26.1848	26.637	26.0949	26.5738	26.6849	27.0352				20	20	20	43.5	43.5	43.5	92.48	0	274.92	3348400000	277
27.5693	26.1502	26.067	26.7338	26.6316	27.2269	27.5462	27.0096	26.7334	25.6834	26.5513	25.4798	27.3037	26.0179	25.5025	26.773	24.8002	27.4286	26.0754	26.2853	26.0906	25.4768	26.456	27.0795	25.7073	25.6362	24.9126	26.3151	27.6183	25.437	24.5083	26.1812	25.2853	26.0906	26.989	27.3739				6	6	6	53.3	53.3	53.3	21.994	0	323.31	4107900000	194
25.6061	25.5403	25.8919	25.6638	25.7083	25.8639	25.5277	25.7021	25.5209	25.9819	24.9209	26.2669	25.5575	24.7689	25.8051	25.3467	25.7521	25.6619	26.0393	25.9254	25.3757	25.888	26.0108	25.9916	25.78	26.1733	26.0435	25.7639	25.61	26.2848	26.1347	26.261	25.8043	25.8943	25.4477	25.9445				14	14	14	27.1	27.1	27.1	101.11	0	146.86	2441800000	287
26.0646	25.0271	25.1562	25.7407	25.9147	25.5316	25.173	25.8521	25.2096	25.3376	25.8149	25.2214	26.0284	24.2381	24.6712	25.2748	26.1233	24.2019	23.5127	24.9756	26.13	24.5715	25.5209	22.7204	26.079	26.223	24.8604	24.7899	26.0247	24.8068	24.4413	26.2276	24.9117	25.0992	25.943	25.6351				7	7	7	51	51	51	26.599	0	239.08	1928700000	115
25.9342	27.0473	26.8555	26.4629	26.5458	26.4982	26.2914	26.4194	26.6302	26.7379	26.1143	26.6106	27.1413	26.5663	26.5766	26.2825	26.7827	26.8116	26.7132	27.0897	26.3521	26.6886	25.8854	26.4145	26.8241	26.914	26.335	26.3435	27.0492	26.5226	26.5044	26.8375	26.0929	26.6127	26.3497	26.7381				20	20	2	44.3	44.3	2.4	100.6	0	91.508	4264400000	296
27.724	26.6831	26.212	26.6529	26.7251	26.9276	26.9662	27.0639	25.7635	26.6006	26.0022	26.8861	26.8235	24.6603	25.9664	26.6327	25.2946	27.6363	26.8646	26.3496	26.8289	26.973	27.7189	27.2215	26.3353	27.0762	25.7338	26.4127	27.9494	26.238	25.8149	27.1647	25.4648	27.1762	26.4597	27.2648				15	15	15	54.1	54.1	54.1	52.8	0	323.31	4666100000	328
26.9292	26.2245	25.3509	25.7331	26.1358	25.6875	26.2842	26.7025	25.7056	26.215	25.7766	26.343	26.8371	26.0692	26.6576	26.1178	26.2172	26.9857	26.7867	25.7168	25.983	26.0985	26.3165	26.3723	26.014	26.1762	24.6257	26.6744	26.2725	25.7413	25.6863	24.7954	25.1941	26.0892	25.9648	25.2929				3	3	3	40.7	40.7	40.7	12.895	0	323.31	4940900000	209
30.9521	30.0458	29.9317	30.216	30.4903	30.3935	30.0283	30.6821	30.2129	30.6024	30.1328	30.3632	30.1676	29.9867	30.0152	29.734	29.9743	30.5943	30.4056	29.6276	29.6179	30.7854	30.6885	30.0534	30.153	30.4222	29.6729	30.3255	30.5855	29.6069	29.8085	30.5994	29.5591	30.5612	29.8115	30.4203				12	12	12	53.5	53.5	53.5	30.791	0	323.31	54961000000	746
24.2392	24.7836	24.1482	24.6187	24.9735	23.8816	23.9704	23.7965	23.3047	24.5986	22.8551	24.6107	24.1419	22.6815	24.403	22.9546	23.0672	24.3967	24.8025	24.9759	23.7508	24.2947	24.7139	24.4142	24.5771	24.8072	24.7133	23.8519	23.9667	24.5992	23.7768	24.6426	24.1107	24.7911	24.4566	24.6613				14	14	14	42.5	42.5	42.5	52.22	0	180.16	827300000	181
23.9923	24.1785	23.4413	23.8147	23.9743	22.4621	23.238	23.7041	23.0519	23.9134	23.5006	23.6192	23.3713	23.1876	23.2333	23.1785	22.7528	23.7808	23.5735	22.6718	23.3762	23.4578	23.9732	23.8062	23.451	23.4746	23.4035	23.1522	23.747	23.1379	22.9909	23.4192	23.4419	23.031	23.6919	23.8762				5	4	4	23.8	19.2	19.2	35.08	0	20.952	527340000	102
30.6296	29.8808	28.616	29.9475	29.5862	29.1397	29.6416	29.8642	30.1552	29.7355	29.6183	30.0355	29.0963	29.9076	29.6737	29.2292	28.236	30.1339	29.5782	28.6302	29.3812	29.0111	29.9316	29.5631	29.5774	29.1657	29.3761	29.6594	30.2455	28.9563	29.0072	29.8976	29.4425	29.6514	29.6082	29.0945				9	9	7	67.5	67.5	51.7	16.961	0	323.31	39835000000	636
36.6353	35.5409	35.6036	35.7548	35.6284	35.2954	34.8314	36.224	35.657	36.0033	35.6679	35.9203	36.3634	35.1293	35.6832	34.9417	34.8817	35.9243	36.09	35.5556	35.38	35.5178	35.8918	35.433	35.9704	36.64	35.1129	35.575	36.2586	35.4604	35.1277	36.3653	35.4756	36.0164	36.1351	35.3892				34	34	2	87.7	87.7	7.2	41.736	0	323.31	3140900000000	10735
29.1511	29.5181	29.414	29.6435	29.7478	29.2883	29.8795	29.7109	29.2431	29.5256	29.0837	29.441	29.828	29.2565	29.2787	28.5313	29.1753	29.8629	29.5866	29.7495	29.4043	29.4998	29.6912	29.7527	29.8027	29.3385	29.215	29.519	29.274	29.0395	29.0677	29.7893	29.2616	29.1203	29.9379	29.8071				17	17	11	62.8	62.8	44.8	46.153	0	323.31	32423000000	1077
28.3702	26.568	27.8062	28.1637	24.8163	27.0848	26.7054	27.8691	26.8301	27.2311	27.2512	26.743	28.3267	28.3572	26.0971	27.0813	27.0703	28.3567	27.6488	27.9484	27.3	27.729	27.5831	29.0349	28.9117	28.1258	27.3999	28.3471	26.6505	26.9686	27.951	28.5814	26.9703	27.8394	28.3862	28.6044				2	2	2	26.9	26.9	26.9	13.373	0	12.676	9015000000	110
27.1268	26.5783	26.3992	25.7975	27.0779	26.2564	26.1026	27.0184	25.9115	25.8452	25.8893	26.2848	26.0114	25.212	25.8882	26.888	26.5759	25.9375	26.1842	26.183	25.6071	26.1123	26.3529	26.3983	26.4465	26.8777	25.295	26.3193	26.9655	25.2681	24.8044	26.6946	25.6189	26.3166	26.331	27.2109				7	7	7	42.3	42.3	42.3	27.399	0	323.31	4859400000	284
26.42	26.6966	26.0854	25.4757	25.7724	25.5774	25.6804	26.3454	25.9368	26.107	25.9261	26.1385	26.0899	25.8236	26.2709	25.8381	26.0394	25.7028	25.647	26.0883	25.8657	25.9634	26.1202	26.0166	26.1769	26.8844	25.5943	26.1497	26.2645	25.7526	25.026	25.8241	25.3163	25.7924	25.7764	25.683				5	5	5	56.5	56.5	56.5	21.258	0	323.31	3449900000	454
26.127	26.483	24.1085	26.3342	25.8903	25.477	25.9981	25.5051	26.7633	25.5574	25.4364	25.9439	25.2203	26.7445	25.5529	24.0224	25.3591	26.425	25.5179	25.0849	25.8604	25.9957	24.8167	25.4917	25.9183	25.1555	26.2147	25.8625	25.7954	25.7052	25.5683	25.6091	26.3035	26.3133	25.7435	25.4162				6	6	6	49.1	49.1	49.1	18.506	0	51.207	2385400000	143
25.1548	25.5326	24.0301	24.9808	24.9953	24.9141	25.1709	25.3127	25.5714	24.6289	25.0385	25.0189	25.5324	23.8115	23.6221	26.0421	26.3904	25.1014	25.0852	24.5943	25.075	25.1796	25.1514	25.3577	24.4795	24.8177	24.3474	24.4644	22.457	24.1024	23.8857	24.7378	24.7418	24.4854	25.0511	24.2515				3	2	2	37.3	27.5	27.5	16.713	0	144.59	1544900000	74
23.5866	24.5195	24.2283	23.9721	23.9312	23.1309	24.2267	24.7646	23.3095	23.804	23.364	23.4738	24.5865	23.457	24.1379	23.6909	21.0284	24.0097	24.2144	23.0173	23.8746	23.688	24.1076	24.003	23.6382	23.6859	23.1332	23.9183	23.4265	23.1654	21.4924	24.407	23.1806	24.0511	23.3623	23.2911				5	3	3	33.8	23	23	23.586	0	141.22	643700000	117
26.0779	26.0613	26.5405	26.4585	26.3581	26.472	26.0959	26.0192	26.7044	26.0645	26.0229	25.6981	26.4927	26.6494	26.3475	26.1	26.6217	26.32	26.4635	26.0027	26.64	26.2785	25.4849	25.7521	25.7455	26.1565	26.3658	26.2857	25.9455	25.6718	26.2677	26.1663	26.2868	26.186	25.7465	26.1536				9	9	4	51.9	51.9	23.6	23.545	0	323.31	3095900000	257
22.9688	24.1293	23.6889	23.5965	23.8363	23.432	23.4405	23.7396	23.0304	23.4908	23.1334	23.7328	23.4659	23.481	23.8313	23.056	24.067	23.2179	23.5835	23.1703	23.5008	23.7498	23.1667	23.3594	23.1456	23.5132	23.2444	23.7672	23.4609	23.4848	23.8867	23.8421	23.4247	23.4991	22.8972	22.758				5	3	3	32.1	21.9	21.9	23.707	0	92.084	474170000	102
24.4388	26.2789	24.5346	24.2383	25.1333	25.1488	24.4069	25.0592	24.4796	24.1081	24.1252	24.4253	24.5148	24.2518	24.1458	25.9211	26.897	24.8411	24.2088	25.1793	24.9935	25.0744	24.2573	24.5171	24.6686	24.2345	23.9731	23.9384	24.3877	23.9156	24.2176	23.9299	23.8823	24.0494	24.6715	24.7812				4	3	3	30	24.5	24.5	22.541	0	134.89	1475800000	107
26.6366	28.0371	24.1986	26.8392	25.7362	26.5646	26.5425	26.6385	25.5179	25.5891	26.0061	25.6568	26.9035	24.7675	24.7942	26.1366	24.9022	25.6927	26.7646	25.8606	27.6503	27.2158	26.5985	26.4157	25.1908	25.9704	25.704	25.514	26.5779	25.073	25.7576	25.5281	25.4597	25.7415	25.6037	25.4527				2	2	2	29.7	29.7	29.7	13.635	0	323.31	3185500000	50
26.6284	26.3438	24.9495	25.7915	26.5438	26.0394	26.1291	26.0597	26.0555	25.9698	26.1877	26.1033	26.1993	25.7736	25.0717	25.2044	25.5856	26.1469	25.9849	25.3534	26.5107	26.1321	26.2199	26.4639	26.259	26.5614	25.3744	26.3108	26.4877	25.2891	25.2446	26.1023	25.4182	25.7898	26.0975	26.562				8	8	8	59.5	59.5	59.5	22.406	0	323.31	2720700000	167
29.7518	29.6843	29.2517	29.7751	29.5484	29.517	28.9692	29.066	28.8726	29.4622	28.9007	28.7769	29.4156	28.1999	28.9366	28.2988	28.9388	29.5153	30.0189	28.8472	28.926	29.9248	29.6491	30.142	29.2986	29.5495	28.3939	29.7506	29.6968	28.4628	28.7273	29.7625	28.5056	29.1944	28.6853	29.1571				8	8	8	63.8	63.8	63.8	17.138	0	242.56	26668000000	363
26.7335	25.6346	26.4185	26.254	26.3313	26.3536	26.5122	26.3326	26.34	26.4553	25.9526	25.7132	26.7603	26.5434	26.2799	26.1729	25.738	26.4139	26.3776	26.7061	26.3979	25.7541	25.8332	25.8814	26.185	26.8051	25.8643	26.2682	26.6039	25.8405	26.146	26.1276	25.9113	25.9457	25.8594	26.4211				5	5	5	31.2	31.2	31.2	23.897	0	307.78	3314700000	140
30.5328	30.0274	30.2457	30.0997	29.8384	29.4393	29.3605	30.4899	29.4616	30.4951	29.5101	30.1642	30.0696	29.3755	30.2351	29.1697	28.653	30.2324	30.2002	30.2417	29.3799	30.0393	30.1901	30.112	30.3233	30.7558	29.8645	30.0809	30.4891	30.0527	30.0314	30.4778	29.7183	30.3082	29.5451	29.9275				16	16	16	58.1	58.1	58.1	47.371	0	323.31	45782000000	861
29.5643	29.2455	29.5276	28.9261	28.9039	28.7132	28.5238	29.4649	28.6419	28.9055	28.6716	28.7995	29.2596	28.2706	29.1567	28.0517	27.649	29.3205	29.0079	29.6204	28.2512	29.1627	28.9759	29.6067	29.2996	29.7914	28.7262	29.1049	29.5842	28.6492	28.7221	29.5284	28.4422	28.975	29.1529	29.1352				10	10	10	41.4	41.4	41.4	44.76	0	323.31	27636000000	812
25.3241	25.4804	25.1642	25.0976	25.2484	25.7894	25.0529	25.4682	25.9301	25.201	25.309	25.1576	25.8082	25.4681	25.4635	25.437	26.8599	24.9569	25.3836	25.9317	25.2822	25.4199	25.0149	24.8205	25.4222	25.419	25.5671	25.2784	24.6407	25.2997	25.3054	24.7293	25.4034	25.082	25.9441	25.3458				6	4	4	37.8	22.1	22.1	42.613	0	323.31	2071800000	195
23.777	24.3283	24.0393	23.4992	24.5147	23.6249	23.1052	23.8956	23.0618	24.5971	23.6565	24.215	24.0543	22.7437	25.0646	23.8507	24.7856	24.0915	23.8952	24.9206	22.5188	23.2825	24.5496	23.5921	24.7004	25.0808	24.5388	24.0068	24.1267	24.4346	24.3181	24.5695	23.3066	24.1699	24.4573	24.4567				8	8	8	22.2	22.2	22.2	67.314	0	323.31	952500000	139
27.4686	27.4819	27.2746	26.9412	27.1251	27.3693	27.0832	28.0228	27.7969	27.4115	27.4423	27.2775	28.0711	27.6503	27.1511	26.678	27.2817	27.5362	27.0226	27.5922	26.7956	27.3705	27.4729	27.6514	27.4389	27.5466	27.0893	27.3208	27.3743	26.795	26.6528	27.3611	26.9873	27.1587	27.5542	26.9643				8	8	5	50.5	50.5	29.9	20.825	0	323.31	9953700000	494
24.8542	25.8274	23.9022	24.765	24.8105	25.2052	25.273	25.7401	24.9422	23.7497	24.8857	23.6993	26.5201	25.2453	23.9949	26.0047	26.5872	24.7591	24.0227	24.1295	24.6131	23.7392	24.0494	24.6491	24.1877	24.113	23.8183	24.1838	24.5772	23.5991	23.5827	24.8557	23.968	24.0024	24.9006	24.1743				6	6	4	48.1	48.1	28.4	20.504	0	124.84	1464000000	94
26.3442	27.2759	27.0093	26.901	26.8471	26.4455	26.3984	27.1302	26.17	26.9724	26.3067	26.7079	26.6462	26.5972	27.2232	26.3351	26.1049	26.4864	26.743	27.5322	26.5134	27.066	26.9915	27.1951	26.5178	26.9301	27.2395	27.2821	26.326	26.8478	26.7307	27.0144	26.6241	26.8253	27.1306	27.2812				7	7	7	27.7	27.7	27.7	29.945	0	323.31	5465600000	366
25.1178	25.961	24.3258	25.4603	25.3897	24.2381	24.3366	23.5068	23.8827	24.314	24.0134	24.6688	24.5063	23.8479	23.4316	24.8819	24.9492	24.4786	24.1324	23.3343	24.5595	24.246	25.5182	24.499	24.5273	23.8615	24.0073	24.0007	24.7791	23.6008	23.5615	25.1511	23.8656	23.9703	24.2434	25.4084				6	6	6	28	28	28	29.506	0	323.31	1060700000	145
23.5403	27.1533	26.9651	25.4608	25.4627	26.0212	24.4814	25.9091	25.2893	25.8331	25.2005	24.8679	26.162	24.1988	25.3964	24.7787	25.2608	25.1602	25.3181	27.049	25.1528	26.4521	25.477	26.0235	26.0409	24.8679	26.0369	26.0146	24.5397	26.0392	25.894	25.306	25.6533	24.3481	26.3135	25.5696				3	3	3	16.2	16.2	16.2	24.146	0	160.52	2362600000	256
28.4417	26.2563	25.6681	27.7939	26.5366	26.5441	27.9246	26.8401	26.9549	25.7392	27.1039	25.3829	26.3144	26.9303	24.252	25.9621	24.6554	27.3114	27.0641	25.1203	25.6148	26.2627	25.9147	26.4331	25.9486	26.3333	23.9504	25.5794	26.9658	24.6142	25.1989	25.7439	24.9174	26.4412	26.8895	27.9346				4	4	4	38.5	38.5	38.5	11.999	0	323.31	4603600000	164
26.2829	26.8257	27.2116	27.1796	26.2305	26.6652	27.2368	27.217	26.6855	27.1345	26.2918	25.8768	26.9826	26.8647	27.3632	26.1297	25.6936	25.7462	26.9421	27.232	24.8325	26.3329	26.6061	26.9344	26.2594	26.1866	26.7497	27.2108	27.2679	26.5826	26.8723	26.7551	26.5208	26.9398	27.5001	25.9952				7	7	2	55.4	55.4	18.7	21.768	0	323.31	4689800000	263
29.8788	27.9133	28.0925	28.3934	25.9413	27.5808	28.496	27.6707	26.0334	27.6394	28.0306	27.519	28.0887	27.8198	27.843	26.7833	26.0172	28.3864	28.3388	27.9699	25.9561	26.2254	27.6671	28.4804	27.0457	27.7092	27.0758	25.8047	28.7068	26.9371	27.7615	28.2618	26.3526	28.2008	28.2415	28.3836				4	4	4	40.2	40.2	40.2	10.932	0	266.94	9429600000	100
27.8986	26.748	26.7459	27.6674	27.2959	28.4945	27.9198	27.3766	28.7441	27.4345	27.748	28.6063	25.5909	27.2486	26.7487	26.9507	27.2938	27.2362	27.2635	27.4421	28.0341	26.3837	27.7056	26.4993	26.3884	25.4862	27.8337	26.4322	28.0754	25.5149	27.3476	27.6579	28.1931	27.3725	26.5088	29.0391				5	5	5	41.2	41.2	41.2	16.537	0	323.31	8057600000	248
26.5092	22.3231	24.6903	25.0959	24.2071	25.9072	24.9451	26.0764	25.5128	25.106	25.3237	24.8978	25.1801	22.8724	25.5134	22.8001	25.173	25.6854	25.3052	26.1346	23.684	24.6688	25.2463	25.8921	25.6946	24.6499	23.8771	25.2368	25.9575	23.9951	20.5663	20.2581	22.0738	22.6677	26.5812	24.3782				3	3	3	37.8	37.8	37.8	13.714	0	98.848	1387100000	74
23.8892	23.8374	25.0427	24.8575	25.1529	25.1239	25.8574	24.4702	25.2603	24.2679	25.7842	24.4566	24.5014	25.9472	25.1913	24.8461	25.1053	25.3626	24.5626	25.4764	24.9442	24.0566	24.4859	24.645	25.0068	24.8662	26.2478	25.0146	24.309	25.4027	25.3803	24.013	25.4908	25.3245	25.2061	24.7182				2	2	2	19.5	19.5	19.5	12.497	0	47.586	1388400000	102
25.1214	25.3902	25.3821	25.8335	26.2732	25.4073	25.7115	25.4446	24.9709	25.3028	25.3455	25.7402	25.0691	25.4552	25.3053	25.3408	25.7788	25.2067	25.4445	25.2315	25.1176	25.6422	24.8162	25.6623	25.5178	24.9627	25.8235	25.3066	24.8299	25.3451	25.1594	25.4089	25.5722	25.4109	25.2473	24.8				6	6	6	54.8	54.8	54.8	20.198	0	323.31	1969000000	183
26.8808	25.7353	26.6193	27.3685	27.4268	27.2397	26.6613	26.5894	27.1573	26.1714	26.7345	26.0063	27.0723	25.7132	25.4862	26.7234	26.541	26.7471	27.0077	25.861	26.4102	26.7941	26.8464	27.1785	25.8027	26.6055	23.5127	26.0376	27.1358	25.0662	25.7956	27.0429	26.1195	26.8143	26.7777	26.4619				3	3	3	58.8	58.8	58.8	9.1175	0	142.21	4238600000	146
27.2438	26.2529	25.5701	26.8388	26.7197	25.6224	26.0279	26.7138	26.3818	26.6031	26.4101	26.4821	26.7038	26.1591	25.9103	26.984	24.8897	26.4292	26.505	25.2813	26.6625	26.6022	26.7553	26.9313	26.1625	26.451	25.872	26.2526	26.729	26.1413	25.5488	26.9044	26.4447	26.6607	27.02	25.9819				6	6	6	89	89	89	14.478	0	323.31	4224100000	201
29.2797	29.9775	30.3019	29.8591	28.7678	29.4192	29.6428	29.3792	28.8223	29.6596	29.1153	29.5795	29.1283	28.7511	29.7888	29.4359	29.1028	29.4448	29.6716	30.0328	28.6098	29.2031	29.712	30.0415	29.5505	29.4855	29.6503	29.9723	29.6372	29.585	29.6152	29.3568	29.4683	29.5537	29.5476	28.6773				13	13	13	45.9	45.9	45.9	51.028	0	323.31	36093000000	904
27.7923	26.296	25.5647	26.2966	25.8395	26.4863	26.6979	27.3729	27.1929	26.83	27.4944	27.2488	27.1097	26.8397	26.3699	27.0709	26.6488	26.9465	26.3462	26.1544	26.0177	26.287	26.1383	26.8061	26.702	26.5796	26.4059	26.498	27.4387	26.2653	25.908	26.5142	26.3954	26.8495	27.7672	27.9464				11	7	7	53.4	44.9	44.9	28.302	0	323.31	5722700000	223
27.8526	28.9879	28.9572	28.7	28.7309	28.5109	27.6681	28.2272	28.1422	28.1242	27.9274	27.6091	28.5799	27.8308	28.2343	29.1646	29.2403	27.9476	28.8129	28.0649	27.9627	28.9992	27.7138	29.4454	28.59	28.2521	27.9324	28.2825	27.8826	27.6845	27.4988	27.8368	27.9769	27.9285	28.6357	27.531				4	4	4	23.7	23.7	23.7	22.127	0	252.39	16961000000	390
27.891	28.4	28.0482	27.8471	28.0071	27.7803	27.7015	28.3185	27.4472	28.534	27.4231	28.0634	27.8373	27.4348	28.024	27.5371	27.1481	27.9654	28.0544	28.3104	27.8956	27.8743	27.857	28.18	27.8143	27.5769	27.8348	28.0457	28.1751	28.0722	28.071	28.4278	27.6972	27.9348	27.7389	26.8687				15	15	4	59.8	59.8	19.1	38.631	0	323.31	10823000000	348
24.0541	24.7862	24.3915	24.7214	24.9606	24.2973	24.4462	24.296	24.4357	24.2279	24.4646	24.4308	24.1173	24.2558	23.9162	25.0564	24.5434	24.5408	24.7547	23.963	23.8588	24.5028	24.4969	24.7359	24.7675	25.1322	24.0544	24.5884	24.5185	23.8144	23.9958	24.8006	24.7902	24.3966	24.14	24.7465				12	3	3	52.3	20.8	20.8	37.186	0	32.733	1344900000	160
25.8557	26.1024	25.9665	26.371	26.9611	25.9847	26.0011	26.3209	25.5543	26.33	25.8007	26.605	26.0949	25.2374	25.9395	25.6408	26.243	26.1277	26.6418	26.2695	26.4225	26.1116	26.5114	25.8636	26.571	27.1269	26.3352	25.9875	26.7238	25.6022	26.3633	26.8519	26.1976	26.0482	26.2792	26.3643				8	8	8	29.5	29.5	29.5	49.184	0	323.31	3756600000	336
26.0903	26.6313	25.9472	26.8358	26.642	26.3022	25.6636	26.2432	24.9157	26.1196	25.5937	26.323	25.7177	25.9274	25.8109	26.524	26.5661	26.2044	26.2757	26.0806	26.0462	25.9503	26.3035	25.6951	26.3192	26.5782	26.127	25.6507	26.613	26.405	26.1965	26.6118	25.9836	26.3675	25.9561	26.7339				15	15	14	46.8	46.8	43.8	45.626	0	323.31	3664300000	287
27.7594	27.4163	28.6603	28.3034	27.7643	27.8671	27.7637	27.9235	27.4888	28.0001	27.1926	27.7701	28.2697	27.7033	28.4571	26.5724	26.5841	27.8391	27.9294	28.381	27.2392	27.8404	28.0366	28.6105	27.8593	28.1452	27.991	28.2443	27.6501	27.6713	27.9294	28.0022	27.4766	28.0256	27.4888	27.6649				7	7	7	41.3	41.3	41.3	24.205	0	323.31	9516500000	260
24.4409	25.4116	25.8419	24.5017	26.767	24.4226	25.3343	26.1126	24.2002	25.1074	24.4549	22.5847	25.4253	25.19	25.7797	23.9226	25.316	24.2539	26.0809	26.554	26.4618	24.1113	24.8604	26.1762	25.7837	24.8476	23.6844	25.4407	24.4013	24.9059	24.825	25.1271	23.603	24.7742	25.8483	24.5972				6	6	6	51.5	51.5	51.5	14.839	0	19.067	1724400000	71
27.0688	27.7125	27.8356	27.3279	27.473	27.5651	26.9581	27.637	26.8806	26.7792	26.4111	26.1934	27.4005	27.1857	27.4172	26.296	27.033	28.0344	28.2719	27.2829	26.9829	27.7398	27.4607	28.228	26.8386	27.4524	26.6913	27.2662	26.3571	26.5308	26.8282	27.2496	22.267	27.0898	26.6759	26.8471				5	5	5	27.4	27.4	27.4	16.445	0	47.651	6159200000	171
29.8501	29.1704	28.0762	29.0274	28.5695	29.1593	29.0279	28.629	28.7678	28.2473	28.6747	28.5509	28.7223	28.5057	28.4336	28.675	27.9956	29.0574	28.5125	28.3221	28.4175	28.7096	28.9374	28.6453	28.5593	29.3018	27.7539	28.3157	29.3207	28.296	27.7416	28.58	28.3096	28.7778	29.9749	29.8749				14	11	11	65.9	62.7	62.7	29.174	0	323.31	23078000000	699
28.7249	28.8879	28.5128	29.533	28.9736	28.6421	28.413	29.3067	27.7069	28.5099	27.6663	28.1667	28.4808	26.0377	28.6287	27.5374	27.3882	28.5213	29.3128	28.2694	27.6284	28.469	28.7675	29.7366	27.3027	28.0585	28.5081	28.6615	28.3192	27.6592	27.9542	28.944	27.9579	28.2538	27.913	26.5895				6	6	6	57	57	57	16.273	0	191.99	15229000000	188
25.3807	24.735	26.3723	24.581	24.9377	25.3599	24.0267	25.3746	25.3547	25.5547	24.8614	24.3759	25.807	25.0586	26.1529	24.8549	25.0379	24.9227	24.7561	26.0687	25.7081	25.298	24.7988	26.1059	25.1585	25.1615	25.4672	25.5849	25.0189	24.9649	25.0719	24.9226	25.0456	25.4513	25.4269	25.0192				2	2	2	26.6	26.6	26.6	15.807	0	85.372	1721700000	78
26.7872	26.7213	27.8377	27.3508	27.2793	27.6333	27.0385	27.4257	26.7486	26.8341	26.36	26.2792	27.8419	27.1455	27.4565	25.9601	26.7605	27.3107	27.3535	26.695	26.8002	27.5691	27.0168	28.1849	26.4649	26.2236	26.8884	27.7571	26.6491	26.6225	26.8053	27.4707	26.4036	26.8808	26.7127	26.8566				5	5	5	25.7	25.7	25.7	17.718	0	8.74	5588500000	121
27.6534	27.4802	27.482	27.5654	27.3135	26.1859	27.1047	26.71	26.6751	26.7477	26.9412	26.4068	26.9785	25.607	26.699	26.7988	26.9895	26.8577	27.5987	26.6607	26.872	27.394	27.0201	27.4736	26.9614	27.1775	25.8163	27.342	27.3382	25.8546	26.3883	27.2344	25.8204	27.1566	27.4852	26.8889				4	4	4	65.2	65.2	65.2	10.803	0	105.94	7470100000	352
26.3926	26.2896	26.5686	26.6019	26.2845	25.3152	25.6488	26.0228	25.4401	26.3401	25.9056	26.2043	26.0514	25.4817	26.38	25.5387	25.4026	26.4691	27.0256	24.7917	26.2081	26.1642	25.6405	26.8368	26.5556	25.0194	25.1192	26.3658	25.4301	25.9849	25.8638	26.4078	26.037	26.8706	26.7614	24.5326				3	3	3	57.9	57.9	57.9	8.496	0	323.31	3538700000	173
28.4028	28.338	27.5808	28.2013	29.0054	27.0291	27.7903	27.3875	27.2241	27.2575	27.7307	27.5212	27.76	27.09	26.5708	27.2337	26.0419	28.1539	28.5456	26.5689	27.9524	27.4814	28.345	26.8697	28.0059	28.2388	26.193	27.8353	28.2154	26.9898	26.8925	28.4019	27.1137	27.7544	27.4827	27.9223				4	4	4	73.5	73.5	73.5	11.845	0	266.34	10070000000	169
28.1576	27.6561	28.3586	28.795	28.7562	28.0089	25.6386	27.4009	27.3753	27.9835	27.5417	28.2568	27.5511	27.1688	27.9442	25.2272	28.0832	27.3142	28.9483	28.0778	28.4689	27.0205	28.2576	29.0698	26.6424	28.199	27.6172	28.3839	28.5231	28.1352	27.9058	27.9175	27.3531	28.466	27.6851	28.0105				3	3	3	27.7	27.7	27.7	13.281	0	252.53	10775000000	113
28.29	28.4315	28.7439	28.9979	28.3968	27.684	27.9284	27.7405	26.9526	27.8397	27.1071	27.9194	27.8308	27.3115	28	27.2445	26.7322	27.6404	28.8873	27.6644	27.403	28.3759	27.8993	28.8911	27.5335	27.2758	26.8787	28.1166	28.2973	27.048	27.5261	28.3768	27.0538	27.849	27.4248	27.1132				3	3	3	21.7	21.7	21.7	13.291	0	49.546	10379000000	250
26.1563	27.3632	26.6043	26.9487	27.2443	26.2913	26.1046	26.7104	25.7532	26.6551	25.9846	26.823	26.4279	25.7681	26.2018	26.6175	26.7539	26.7415	26.7613	26.5671	26.4551	26.9054	26.4945	26.3926	27.03	27.7156	26.5823	26.3131	26.4372	26.3252	26.3082	27.1085	26.666	26.6618	27.5635	27.5629				10	10	10	39.8	39.8	39.8	44.172	0	323.31	4820900000	308
27.1239	26.743	27.8726	27.3063	27.1563	27.1724	26.8458	27.6122	27.1491	27.6508	27.0589	27.3694	27.7452	28.0164	28.5449	26.1937	26.4045	27.0473	27.6185	28.8511	26.9666	27.9364	27.4599	27.5585	27.5318	27.3104	27.7088	28.0692	27.1952	27.6113	27.6978	27.4722	27.0533	27.7159	27.4426	27.1818				6	6	6	27.4	27.4	27.4	29.995	0	323.31	7448600000	152
27.0179	28.7472	28.5163	28.3031	27.5929	27.8819	27.3471	27.5991	26.8643	27.5482	26.9681	27.5659	28.1716	27.0338	28.2097	26.6081	27.405	27.8905	28.3858	27.495	27.3885	27.5505	27.921	28.021	27.3946	27.3785	27.7751	27.5156	26.981	27.6866	27.6865	27.9457	27.5376	27.3653	27.6299	27.2849				7	7	6	28.5	28.5	25.9	29.597	0	323.31	9686000000	346
27.1786	27.092	27.6644	26.356	28.0921	27.0394	27.2185	26.5694	26.6784	27.5686	25.8968	26.3213	27.5914	27.6603	26.5343	26.8862	26.1614	27.277	28.3332	28.274	27.6738	27.3963	27.5523	26.7507	27.6774	27.5384	27.6502	24.6086	27.014	26.4584	27.8226	27.3124	26.9453	27.2045	27.1085	27.1919				4	4	4	22.5	22.5	22.5	28.68	0	323.31	6797300000	174
33.5811	34.7311	35.4742	34.6616	33.6656	33.6195	33.4289	34.0874	32.7054	34.1148	33.1641	33.4102	33.5699	33.3797	34.999	33.0232	33.0269	33.168	35.0662	34.3738	32.2912	34.3923	33.7412	35.305	33.5063	32.4111	33.1966	35.0759	34.152	34.0063	34.3492	34.2068	33.3473	34.1767	32.7358	31.6849				13	13	13	63.1	63.1	63.1	11.367	0	323.31	765780000000	3186
28.0416	27.8617	28.1086	28.3648	27.7418	27.5154	28.0501	27.9986	26.9663	28.1039	27.1746	27.8436	27.3443	27.808	28.8763	26.8818	26.7953	27.7491	28.0299	28.0856	26.8977	28.1635	28.0494	27.9923	27.8081	27.8802	27.6133	28.7431	27.996	27.3569	28.0385	28.3509	27.0662	28.292	27.2575	27.6005				7	7	7	40.7	40.7	40.7	24.423	0	150.27	9492900000	173
28.453	28.0987	27.9418	28.136	27.7811	27.2285	26.7949	26.8416	25.8106	26.3185	26.5647	25.6775	27.3701	26.8993	27.2945	26.6787	26.5066	27.5677	27.8667	27.0727	27.1956	27.424	26.8845	27.0813	26.773	26.5061	26.9565	26.8242	27.2984	27.0187	26.9348	27.6774	26.9945	27.3708	26.7161	26.092				3	3	3	30.7	30.7	30.7	14.865	0	54.191	9405100000	173
27.0279	26.1593	26.0191	27.1264	26.9999	26.6374	27.2244	26.8573	26.6986	27.5045	26.3578	27.225	26.9476	25.9606	26.5743	26.6039	25.2133	26.3979	26.9223	26.2902	27.3759	27.4228	26.5842	27.6573	26.4881	26.5079	27.4236	27.4816	26.48	27.4312	27.3521	27.0398	26.4219	27.2481	27.2239	26.5149				2	2	2	28.3	28.3	28.3	17.04	0	323.31	7892400000	143
25.4816	25.7052	26.7744	26.5871	23.9121	26.1698	25.3444	26.4154	26.0727	26.674	25.9225	25.4429	27.1209	26.348	26.8555	25.1437	25.2773	25.8563	26.9094	26.3601	26.2415	26.3324	25.9399	26.8983	26.5518	25.8497	26.5838	26.7221	25.5044	25.9253	26.1281	27.0508	25.7885	26.5045	26.5368	26.1656				4	4	4	35.4	35.4	35.4	15.069	0	260.37	3950900000	271
27.8067	26.7227	28.7698	28.3638	27.9244	27.4455	27.8397	27.9568	27.167	27.2039	26.8078	26.8657	27.5728	27.5844	28.3879	26.471	26.7645	28.0408	28.1755	27.6158	25.7004	28.2333	28.1911	28.4457	27.3233	27.1723	26.5149	28.2981	28.1275	26.673	27.2024	27.9813	26.8486	27.734	26.9671	27.595				4	4	4	24	24	24	13.742	0	16.532	7975300000	62
25.9541	26.2669	26.7962	26.1878	25.7101	25.4873	25.514	25.8604	24.9166	25.585	24.8182	25.0156	25.9459	25.5376	26.1802	24.3992	25.3195	21.6475	26.4839	25.7453	25.0722	25.2126	25.7022	26.826	25.6318	25.5014	25.4685	25.9468	25.1316	24.8727	25.2566	25.5096	25.0783	25.6087	25.4559	25.037				2	2	2	19.1	19.1	19.1	13.015	0	67.319	2067400000	133
30.4387	30.2196	29.3464	30.6828	30.8447	29.036	30.0109	28.9866	29.7104	29.0418	29.6548	28.4694	29.6291	29.8416	27.7386	29.7808	29.5034	29.0973	30.7982	28.4398	29.4314	29.6239	29.698	30.3442	29.3285	29.381	26.715	29.9129	30.2381	28.3398	28.3321	29.9695	28.3469	29.7675	28.2184	28.4133				2	2	2	33.3	33.3	33.3	7.8409	0	323.31	36061000000	302
27.8711	27.4997	26.7745	26.91	26.9324	26.6043	26.8452	27.1698	27.0084	26.9135	26.8266	27.0596	27.08	27.0693	27.385	26.547	26.8606	27.0649	26.7288	27.0393	26.6682	26.7685	27.183	26.8193	26.2114	26.5686	26.3993	26.9637	27.0964	26.4431	26.3847	27.0052	27.0348	26.7714	26.9814	25.815				9	9	6	41.5	41.5	22.4	37.377	0	323.31	5977900000	383
26.5509	26.5663	25.6313	25.9166	26.2501	25.7362	26.3892	26.6153	26.2571	26.1063	26.1447	26.4801	26.754	26.0683	25.122	26.214	24.842	26.6366	25.955	26.5306	25.8157	25.5949	26.4916	25.7704	26.045	25.9207	25.8763	26.137	26.5133	26.1176	25.7377	26.5596	25.9059	26.5943	25.6037	25.4888				9	7	5	41.8	31.8	27.6	37.331	0	194.47	3166000000	196
26.1858	25.4622	27.3471	27.119	27.0694	26.6971	26.8149	26.5968	25.5132	26.8445	26.1928	26.8067	26.7255	25.9891	27.0603	26.2465	26.1467	26.869	27.3406	26.98	26.6263	26.6919	26.5068	27.0993	26.2237	26.2701	26.8637	26.8247	26.0454	26.8018	26.9311	26.6442	26.2526	26.536	26.1221	25.8983				4	4	4	34.8	34.8	34.8	12.784	0	165.83	4228200000	103
25.9416	25.3186	26.611	25.9198	25.6498	26.3891	24.6922	26.5411	25.7968	26.4816	25.2155	25.6824	26.6119	26.4833	27.108	24.6353	25.2292	25.3887	26.5334	26.5567	25.6663	26.4851	25.9512	26.3319	26.393	25.5513	26.6966	26.3786	25.1037	26.2658	26.334	26.3793	26.2552	25.9359	26.4392	25.7521				8	8	8	37.3	37.3	37.3	24.831	0	323.31	2875100000	145
27.2205	26.9791	28.4157	27.1857	27.5897	27.8919	27.4484	27.494	27.2015	27.2744	26.8673	26.8478	27.8042	27.8283	28.241	26.0962	26.697	27.5077	27.825	27.6618	27.1681	28.0504	27.3571	27.642	27.1491	26.9578	27.2109	27.9679	26.7307	27.0382	27.1779	27.5962	26.6751	27.091	27.4245	26.9432				3	3	3	27.7	27.7	27.7	20.124	0	148.34	7080100000	91
32.6943	32.2573	32.0975	32.7193	32.3427	31.3071	32.0303	32.0597	31.3976	31.9779	31.5094	31.6348	31.6	31.8018	32.2622	30.9266	30.6756	32.1711	32.6785	31.1673	31.5058	32.215	32.2679	32.1405	31.8305	32.0436	31.1513	32.2197	32.2366	31.3991	31.3544	32.2614	31.3332	32.1342	31.3237	32.4795				13	13	13	71.5	71.5	71.5	18.012	0	323.31	172620000000	1720
31.3962	31.889	30.3792	31.7169	31.1778	30.742	31.3216	31.3278	30.8755	30.8695	30.6305	30.6559	31.0083	30.434	30.4276	30.4327	30.2101	31.9109	32.2632	30.6242	30.9282	31.1162	31.308	31.5023	31.4227	31.7303	30.2961	30.8887	31.8055	30.2771	30.6014	31.1547	30.394	30.6115	30.9235	31.5086				6	6	6	38.5	38.5	38.5	17.965	0	323.31	99687000000	353
27.4464	27.1556	27.6804	27.7532	27.1954	27.4778	27.7289	28.0461	26.5773	27.423	26.495	27.0351	27.49	26.6375	27.5098	26.6795	26.488	27.4834	27.6638	27.4944	26.4907	27.3708	27.7566	27.8152	27.5609	27.0116	26.6581	27.4864	27.7153	26.9804	27.0111	27.5839	26.6827	27.2859	27.3657	26.7052				7	7	7	41.9	41.9	41.9	25.206	0	270.1	6806000000	125
25.5969	25.9126	25.9027	25.967	24.7562	24.4228	25.1964	25.0685	24.2439	25.3316	24.8925	24.9305	24.592	24.7733	25.3842	24.4264	24.2209	24.5631	25.8784	25.5842	24.7745	24.2713	25.3457	25.7494	25.2884	24.8185	24.7317	25.6424	25.1132	24.8811	25.0958	25.5851	24.6664	25.1221	25.2197	24.5377				3	3	3	27.1	27.1	27.1	21.935	0	159.81	2016700000	255
24.0724	23.7097	22.7322	23.4149	23.1835	24.029	23.1373	23.8568	24.0664	23.7699	23.8404	23.4156	23.878	23.9957	24.2617	23.9142	24.5258	23.2279	23.3727	24.3571	24.8833	23.6527	23.5958	22.2885	23.7472	23.7426	25.0996	23.7245	23.5192	23.8199	24.1572	22.9116	24.4115	22.657	24.2819	23.1787				22	14	14	38.8	28.9	28.9	98.117	0	126.87	608310000	124
30.8765	31.5422	30.2498	30.7731	30.7966	29.9449	30.0107	30.8313	30.1236	30.6329	30.2288	30.5204	30.2216	29.9252	30.6394	30.8856	30.5175	30.7326	30.8994	30.0669	30.1072	30.6419	31.013	30.6299	30.7146	31.3384	29.7578	30.575	30.896	29.9422	30.0509	31.0125	29.9181	30.6479	30.1918	30.6447				16	16	10	65.3	65.3	48.2	27.745	0	323.31	85663000000	2097
23.7321	24.9245	24.7542	24.1136	24.3427	23.8614	22.9379	23.9087	23.654	24.094	23.8275	24.1645	24.2084	23.534	23.8228	24.4702	24.9406	24.0922	25.2671	23.3973	24.147	24.627	23.691	23.9683	24.7096	24.1615	23.943	24.3016	23.4043	23.9036	23.6826	24.204	23.8722	23.8897	24.0565	24.9146				5	5	5	19.7	19.7	19.7	51.691	0	193.43	824280000	141
24.878	23.59	23.2475	24.102	23.2121	24.0557	23.9241	23.9879	23.6131	23.1544	24.0498	23.5556	23.6515	24.4473	23.4767	22.5003	22.848	23.88	23.2768	23.5272	23.2708	23.2571	23.4399	23.4641	23.3594	22.2598	23.3235	23.3683	23.5076	23.1303	22.4745	24.0427	23.7951	23.9203	24.5967	22.8443				3	3	3	44.2	44.2	44.2	12.452	0	259.85	586100000	95
26.6102	25.1168	25.4937	25.2525	24.5082	25.8838	24.9792	25.9955	25.9377	25.7649	25.69	25.0739	25.5707	25.4304	26.018	24.4183	23.6477	25.2585	25.1775	25.0939	25.3149	25.6625	25.8568	25.4389	25.3589	25.8385	25.1869	25.6526	26.1653	24.8951	25.5802	25.7889	25.3592	25.864	25.9512	25.5842				5	5	5	48.8	48.8	48.8	18.063	0	323.31	1809000000	102
27.6052	26.8085	24.1021	27.3897	27.388	26.5773	26.8072	25.9078	26.0322	26.0289	26.0422	26.3533	26.4516	25.7787	25.4251	26.3248	24.706	26.8688	27.1415	26.0678	26.9604	25.811	26.4841	27.5983	26.2934	27.042	25.2939	26.0434	26.6483	25.4253	25.0977	26.8431	26.264	26.4288	27.0504	27.1219				2	2	2	39.8	39.8	39.8	9.1113	0	76.723	5838000000	402
29.5661	28.7786	29.2014	29.5173	29.2904	28.8527	28.8891	29.3664	28.8242	29.0611	29.1937	28.7563	28.8155	28.8208	29.5666	28.058	28.0395	29.1955	29.3936	29.3716	28.5735	29.2444	29.2961	29.1243	29.2594	29.2879	28.9555	29.4789	28.9897	28.7875	28.8453	29.2015	28.9155	29.1659	28.8103	28.8532				14	14	14	65	65	65	35.076	0	323.31	22739000000	927
31.8755	30.1689	27.8022	31.741	31.7433	29.268	30.5842	30.2605	30.1528	30.0642	30.4071	30.1651	30.6368	31.182	28.0767	29.9693	28.5101	31.7812	30.4165	28.9175	27.6216	30.8788	30.083	30.8297	30.5201	30.4098	28.7735	29.8187	31.2955	28.9636	24.3208	30.7916	29.5582	30.535	30.2595	31.2523				3	3	3	54.5	54.5	54.5	5.0256	0	115.45	86033000000	292
26.7756	26.1361	26.1187	26.5153	26.2778	26.0508	26.2965	26.1447	25.9468	26.3903	26.1563	26.6189	26.0496	26.2492	26.2123	25.5272	25.4672	26.6509	26.4894	26.6433	26.1266	25.6794	26.4236	25.984	26.3263	26.5972	26.0938	26.1818	26.6146	25.8396	26.0606	26.5889	25.7422	26.3157	25.8415	26.0159				9	9	8	53.4	53.4	48.9	35.594	0	323.31	3356500000	280
22.7574	22.567	25.2501	23.0042	23.7017	24.1926	24.1464	24.0489	23.3485	23.7411	23.9635	23.5259	23.673	25.145	25.1465	23.7253	23.7363	23.4486	23.2447	24.8839	23.3667	24.2132	23.3069	22.8412	24.173	24.1061	24.2443	24.6243	23.6509	24.2808	24.8075	22.7433	24.0155	24.4874	23.6544	24.0241				3	3	3	17.1	17.1	17.1	18.988	0	29.402	684330000	76
28.9244	26.8215	28.0382	27.7612	28.3207	28.4261	28.0792	28.295	29.0956	28.6612	28.2045	28.2768	28.0285	28.8695	28.4361	27.8912	28.521	27.9599	27.7372	27.9007	27.8334	28.3277	27.9787	27.4078	28.4588	27.9593	28.8892	28.008	28.1074	27.9205	28.4966	28.2496	28.1542	28.0854	28.5657	28.9145				9	5	3	27.4	18.1	17.7	28.521	0	323.31	12914000000	198
27.4062	26.9632	26.8305	26.9316	23.865	27.0214	26.7538	27.4511	26.3386	27.157	26.1668	26.5553	27.3181	26.1386	26.904	26.9201	27.1885	27.1242	26.9913	26.9247	26.3426	26.4661	27.3753	27.5219	26.3835	26.4605	26.4579	27.0061	27.0932	26.4436	26.5842	27.1441	26.3263	26.3829	28.1627	26.2588				5	5	5	41.5	41.5	41.5	24.003	0	192.78	7439200000	227
31.3214	31.1393	31.7836	31.2071	31.2797	31.9405	31.3	31.4744	31.6197	32.0005	31.6224	31.6679	31.8095	31.8859	32.3228	30.9467	30.9337	31.3066	31.4568	31.8937	31.4362	31.1352	31.3846	31.7276	31.2899	31.5874	32.178	31.5814	31.5879	31.5896	31.6631	31.6956	31.4096	31.8743	31.7247	31.412				15	15	8	60	60	38.7	50.14	0	323.31	143160000000	1002
26.7391	27.4658	27.9114	27.3873	27.4725	25.5621	27.1162	26.8265	26.1834	27.5189	26.9606	27.4153	26.0891	26.1412	27.5013	26.7883	26.28	27.4663	27.9767	26.9535	26.2899	27.0911	27.2227	27.4571	27.323	28.0924	26.4848	27.7713	27.7971	27.1541	27.2686	27.7584	26.8201	27.6481	26.3771	27.3728				20	4	4	60	12.5	12.5	48.328	0	48.203	6342200000	219
24.8647	23.3905	25.0228	24.9333	24.8099	24.6157	23.8669	25.0739	24.3015	25.4724	24.899	24.8848	25.2406	25.1208	25.6352	24.9223	23.9909	24.6569	25.0613	25.2272	24.519	24.3326	24.6114	25.2445	24.4798	24.7513	25.2246	25.732	25.1166	25.2952	25.4587	25.2198	24.9715	25.297	24.6357	24.2517				10	10	10	35.8	35.8	35.8	45.143	0	108.67	1321800000	116
26.7323	27.0427	26.9006	26.1158	26.1511	26.8311	26.6959	26.7962	26.9325	26.6431	26.8054	26.7461	27.0659	26.7605	27.3316	27.266	26.861	26.7883	27.276	26.071	26.8591	27.0318	27.0043	26.837	26.5058	27.3348	26.2351	27.1438	27.0118	26.4991	26.7505	26.6063	26.484	27.0249	27.0938	26.687				4	4	4	32.3	32.3	32.3	25.569	0	323.31	5151200000	284
27.6044	30.5414	29.2969	28.7856	26.7335	28.2605	26.0729	29.3913	27.9456	30.805	29.174	30.8673	29.7198	28.7462	29.5877	29.7757	29.4163	28.1185	29.4509	29.3934	30.128	29.9559	29.1893	30.7369	28.6449	26.7929	28.912	30.4932	29.5582	30.0289	29.8371	28.8428	29.5314	29.0028	25.3825	26.6734				5	5	3	41.2	41.2	27.2	15.404	0	323.31	41976000000	183
32.4366	31.2206	33.6624	33.4821	31.9761	34.3534	32.2985	32.2458	33.7223	32.1681	34.1914	32.014	32.9177	34.8788	34.3125	32.2082	35.2514	32.2937	30.8704	33.3644	32.5603	33.4401	32.7986	32.677	33.5319	32.8837	32.0971	35.8091	32.1851	34.2464	33.2149	31.9718	33.9974	33.5629	33.7566	31.8799				14	14	11	81.6	81.6	70.1	15.998	0	323.31	549640000000	2801
28.9978	28.8524	31.1486	29.875	29.106	31.3564	28.9597	28.7427	31.1152	29.1663	31.0285	28.3851	30.3287	32.144	31.2182	29.8208	33.4188	29.3583	28.1267	30.4459	28.9489	30.7232	29.9657	29.951	30.4874	30.3383	30.1635	32.7627	29.2299	31.362	30.5312	28.6936	30.737	30.113	31.7896	29.7679				7	7	7	66.9	66.9	66.9	15.257	0	264.82	107710000000	892
23.1706	25.2564	25.3976	25.0796	24.8841	24.484	23.981	23.3079	22.4986	24.5654	24.2788	25.0968	24.318	23.7122	26.3656	23.2607	23.8146	22.4949	24.7124	25.1752	24.9157	24.6701	25.3721	23.6788	25.4333	25.6542	25.3122	24.9353	23.6111	25.4024	25.6296	24.876	24.5867	24.7381	24.9306	22.4584				11	11	11	19.5	19.5	19.5	107.97	0	117.85	1137700000	166
28.2601	28.7712	28.2402	28.0217	28.4603	28.2715	27.9416	28.2099	27.924	28.5114	28.2284	28.3964	28.5145	27.8689	28.2351	28.1843	28.4872	28.4114	28.5093	28.3856	28.0931	28.6985	28.4015	28.4277	28.8969	28.9975	28.3067	28.2263	28.2741	28.2619	28.1047	28.6439	28.2894	28.4134	28.4154	29.1722				21	21	21	54.2	54.2	54.2	57.488	0	323.31	17432000000	1326
26.8496	27.4238	27.9614	27.3485	27.6346	27.3464	27.2486	26.9311	27.1074	27.8037	27.2783	28.1177	27.264	27.3867	28.5989	27.2763	27.6536	26.6911	27.3416	28.2937	27.8897	27.6055	27.8353	26.203	28.0605	27.9366	28.3232	27.6751	27.767	28.1592	28.2624	27.7932	27.7959	27.8777	27.1414	27.333				88	88	88	30.4	30.4	30.4	469.08	0	323.31	8979200000	1244
25.419	25.7308	25.452	25.5923	25.875	25.4411	25.1757	25.1819	24.7569	25.407	24.9192	25.2926	26.2212	24.4517	25.2681	25.0556	25.7159	25.9973	25.7256	25.2182	25.2033	25.4567	25.1936	25.8194	24.7458	24.8613	24.4799	25.1072	25.264	24.606	24.3204	26.0164	24.6162	25.2446	24.9019	25.3847				8	8	8	44.8	44.8	44.8	31.546	0	197.55	1903200000	187
26.2986	26.2869	26.5171	26.7307	26.5156	26.5398	26.6524	26.3703	25.8058	26.6022	25.1202	26.1352	26.105	25.9513	27.2213	25.8073	25.5006	26.3522	26.1817	25.2618	25.744	27.0423	26.7532	27.063	26.0146	25.3058	26.2662	27.0353	26.4757	26.4579	26.5316	26.8831	24.971	26.3325	25.1867	25.7934				3	3	3	18.6	18.6	18.6	23.671	0	323.31	3406400000	82
26.2599	26.2322	27.4359	25.0837	26.5774	26.6101	25.7379	26.2769	25.8233	26.8002	25.7316	26.5014	26.5085	26.3556	27.7938	25.5832	25.8882	26.2285	26.7209	27.5985	26.0213	26.862	26.7803	26.7624	26.6182	26.8201	26.97	27.052	26.2922	26.5028	26.8578	26.8874	25.9263	26.8288	25.7923	25.5009				5	5	5	30.6	30.6	30.6	17.779	0	72.044	5053200000	137
28.7113	28.7038	29.0233	28.8278	28.6452	28.5024	28.5598	28.856	28.793	28.6923	28.6238	28.2068	28.9849	28.7534	28.2442	28.404	28.3332	28.6753	28.8827	28.5307	28.108	28.6813	28.6266	29.0175	28.3094	28.5047	28.3047	28.7208	28.4521	28.172	28.1863	28.6045	28.0951	28.3679	28.8244	28.3508				10	10	2	74.6	74.6	19.9	20.697	0	323.31	19044000000	777
29.4412	28.8067	29.7238	29.4692	28.4259	28.8093	28.3707	28.4652	28.9628	28.7785	28.4555	28.3849	28.5353	28.444	28.8548	27.5996	26.814	29.0367	28.3536	27.9018	27.6903	29.4762	28.9277	28.8425	29.0178	27.9253	27.5455	28.7327	28.9709	28.0234	27.8306	28.8946	27.6505	29.4581	28.7286	27.7778				3	3	3	56.7	56.7	56.7	12.259	0	323.31	16954000000	137
27.3664	28.7116	28.8643	29.0701	28.1656	27.7229	28.6567	28.1149	27.4207	28.2692	27.8968	28.5921	27.5741	27.327	28.1132	28.1506	27.0028	28.5681	29.1541	28.4806	27.9181	28.4282	28.8731	29.125	28.5725	27.9295	27.3772	28.8847	28.8386	27.8198	27.9827	28.6882	27.9244	27.7892	27.7114	27.6903				3	3	2	24.2	24.2	24.2	14.203	0	39.577	13191000000	139
28.9444	30.5734	25.6251	28.8203	27.8812	24.3102	28.4111	28.986	27.3207	29.9975	28.1719	28.444	30.7225	27.6703	31.8797	26.4405	26.0572	27.0766	30.3876	31.494	25.3695	29.5748	29.1729	27.1638	25.6277	28.561	29.0969	31.3519	29.4821	31.1836	30.1447	30.6344	30.1075	30.3736	28.4368	26.3992				4	2	2	38.2	24.3	24.3	15.328	0	323.31	36180000000	96
26.7821	27.4723	27.895	28.0903	27.6675	29.321	28.4526	27.2793	29.449	29.031	29.4499	28.8	29.0104	30.0105	29.5087	29.2509	28.9865	27.809	27.7257	28.5329	29.0927	27.9481	27.5308	27.0366	28.2947	26.2473	30.2845	28.3527	27.4677	29.859	29.9488	26.4746	29.6095	28.194	28.2316	27.3338				56	56	56	23.8	23.8	23.8	468.83	0	323.31	20014000000	1168
25.6626	25.8089	26.5402	26.1976	26.3696	25.5619	25.7055	25.7795	25.228	26.1149	25.5897	26.1986	26.4546	25.7946	26.0687	25.8263	25.2359	25.9239	26.478	26.1802	25.766	26.4483	25.8166	25.9536	26.5224	26.6036	25.7426	25.9917	25.7606	26.0805	25.951	26.3424	25.6722	26.3422	25.1829	26.2719				14	14	14	23.9	23.9	23.9	105.02	0	323.31	2748800000	293
27.7982	29.2486	28.7173	27.9159	27.9216	27.4489	25.9339	26.1586	26.6718	27.4503	25.69	25.9913	26.4467	26.1214	26.7153	27.3453	27.7041	27.1388	27.9847	27.4466	29.2455	27.9805	26.8921	28.3434	27.444	27.346	25.8288	27.743	27.3702	26.7868	26.4956	27.8966	26.9615	27.477	27.3679	25.6236				2	2	2	31.8	31.8	31.8	17.17	0	63.998	10740000000	154
24.4756	24.3842	25.2304	25.8836	25.958	25.7356	25.9476	24.8331	26.3794	25.2324	26.1912	25.545	26.1417	27.0635	25.2263	25.9546	26.573	25.4644	25.1581	25.896	26.5677	25.427	24.6254	24.7525	25.8887	24.2482	27.7307	25.0725	24.4421	26.2813	26.1972	24.7919	26.7343	25.3591	26.0543	25.7452				19	19	19	24.7	24.7	24.7	141.45	0	323.31	2582300000	250
25.2616	25.7658	26.1527	25.6824	24.6765	25.3269	25.9735	25.502	25.9296	25.8177	25.5268	25.6902	25.6156	24.7285	25.5907	26.8291	25.9765	25.8279	26.0547	25.6205	24.6369	25.5316	26.0014	26.6701	25.62	25.9993	25.3867	26.4406	25.9806	25.6622	25.753	26.0156	25.3295	25.5385	25.6699	24.4744				6	6	6	37.3	37.3	37.3	34.91	0	155.69	2363300000	148
29.2409	29.2879	29.6923	29.3169	29.4985	29.5701	29.6402	29.8992	29.7356	29.7866	29.6268	29.6816	29.6795	29.9677	29.7708	29.624	29.8416	29.3877	29.4155	30.2315	29.7509	29.6491	29.3677	29.1237	29.6923	29.696	30.1924	29.4667	29.4571	29.982	29.8866	29.5535	29.7005	29.8597	30.01	29.5837				65	65	65	56.1	56.1	56.1	187.89	0	323.31	40687000000	2077
22.5741	23.1779	23.6736	23.1367	23.565	24.8481	25.1412	24.0434	24.0701	24.1376	23.4276	23.3407	22.8807	23.0663	24.2454	24.0257	23.9321	24.171	24.1042	23.4342	22.7025	23.8206	24.3307	23.9326	23.5438	23.9152	24.1283	23.2118	23.6794	23.3142	23.7119	24.5987	22.8547	23.6597	23.7081	21.5918				9	9	9	17.4	17.4	17.4	96.748	0	197.28	614870000	87
26.8866	26.1153	28.3709	28.0021	26.259	27.5356	27.8008	28.0052	27.0641	28.5713	27.8757	28.4347	27.5371	27.2673	29.2161	27.636	26.7466	27.0299	27.4442	29.2074	27.8252	27.5292	28.3638	27.6453	28.181	27.6814	28.5895	28.5238	28.18	28.7732	28.3925	28.3395	28.1515	28.1583	28.1794	27.3644				13	13	13	25.6	25.6	25.6	88.979	0	323.31	12026000000	562
27.2135	27.9949	27.8565	27.9988	28.3132	27.5681	27.2982	27.2663	26.9196	28.2389	27.4238	27.9742	27.2559	27.8373	28.6823	27.7999	27.8235	27.6103	28.456	28.1331	28.0538	28.1163	27.314	27.3192	28.7072	29.1907	28.1805	27.9561	27.3359	28.8332	28.4463	28.4613	28.124	28.2295	26.5377	27.736				47	47	3	31.2	31.2	2.2	274.61	0	323.31	10752000000	962
29.1413	29.0568	28.0986	28.7103	27.971	28.4839	28.0707	28.7694	27.8699	28.8507	28.2325	28.457	28.5178	27.6923	28.401	27.8696	27.6312	28.5422	28.5069	28.6854	27.614	28.2438	28.7463	28.3671	28.7593	28.2771	27.8628	28.9981	27.1314	28.3062	28.2703	28.9573	28.0451	28.6041	28.3701	28.4017				5	5	5	29.4	29.4	29.4	30.992	0	323.31	14977000000	219
29.0808	28.3083	27.4929	28.4516	28.2595	26.327	27.7161	27.3654	26.0592	27.6149	26.8295	27.7221	27.1798	26.0495	26.888	26.6955	24.9886	28.0231	28.4804	26.8417	27.7715	27.7131	27.7231	27.437	27.7434	27.5746	26.7455	27.6046	28.0122	27.2802	26.9533	28.4693	27.1968	27.6528	27.0684	27.4153				3	3	3	19.6	19.6	19.6	24.153	0	323.31	12361000000	426
29.4401	28.1446	27.4866	28.6841	28.3841	28.121	27.3469	29.4952	26.4806	26.7584	27.2263	27.2218	28.5581	28.0461	27.7975	26.1002	26.5721	28.2954	28.2248	28.4087	27.1613	27.4227	28.8578	28.7464	27.9023	29.2075	26.6026	27.8968	28.4545	26.8588	27.2344	28.1432	24.8201	28.1448	27.4477	28.2462				5	5	5	54.1	54.1	54.1	15.164	0	323.31	11391000000	316
26.4018	26.221	26.2251	25.8512	26.3034	26.2638	26.082	26.208	25.1264	26.4827	26.1205	26.7525	24.8775	25.16	25.3563	26.1623	25.3256	26.6287	26.1582	26.3832	25.1313	26.1484	26.2158	26.7372	25.8989	26.6295	25.4233	25.5392	26.6283	25.7151	26.4398	26.4227	25.7693	26.1631	26.2918	25.6081				15	13	13	30.1	26.5	26.5	85.595	0	323.31	3017500000	384
27.0312	27.2986	25.6444	28.3812	26.5443	28.536	26.3514	26.3052	29.3042	27.8335	27.4905	27.3027	27.1024	28.3566	27.2063	26.9339	28.6997	28.0045	27.616	25.933	28.93	27.197	27.0135	25.3012	27.9863	27.1954	29.6679	27.7142	26.6676	27.7769	27.3677	26.6573	28.5443	27.0733	26.8071	27.2702				8	8	7	39.3	39.3	39.3	22.611	0	323.31	12464000000	416
24.1	25.8981	22.9362	25.0594	23.2747	24.0285	24.7239	24.1856	23.7158	23.198	23.7177	22.8954	25.6804	23.0448	23.1601	22.5542	24.3412	24.2738	24.2032	23.7332	22.9094	22.0684	23.7233	24.2082	24.2031	24.2691	22.617	24.2027	23.8923	22.1125	23.348	23.9418	22.6047	24.1572	22.9075	23.4833				4	4	4	17	17	17	40.066	0	323.31	684760000	99
23.9297	25.8776	26.931	23.7485	24.2395	25.9952	25.3763	25.7434	24.0966	25.6013	25.8842	26.5845	25.897	25.7919	26.9457	26.9494	26.7285	24.6549	24.0409	26.9483	26.1004	26.1524	24.061	22.6736	25.159	22.6642	26.5918	26.3711	24.191	27.1956	27.0618	24.969	26.2131	25.891	25.8648	24.0008				26	26	26	38.5	38.5	38.5	115.93	0	323.31	2832400000	252
26.1873	26.7015	26.3094	26.6992	26.5457	26.5588	27.0948	26.9781	25.1809	26.7502	25.8373	26.4955	26.3388	26.4362	27.2904	25.4625	25.6393	26.4891	26.9237	27.2086	25.4633	26.5933	27.2647	26.9067	26.3016	26.3344	26.6756	26.6439	26.3751	26.4292	26.7307	26.6161	26.5259	26.491	26.0496	26.2199				4	4	4	24.4	24.4	24.4	20.762	0	132.24	3807800000	87
24.9907	26.1265	24.9443	25.1708	25.2833	25.0676	25.8387	25.8193	26.1399	24.2996	26.0851	25.4264	25.7797	26.1621	24.5766	26.6294	26.1933	25.9219	25.6241	25.3942	25.9758	25.4382	24.0507	23.7473	25.2597	24.5163	25.8808	24.7296	25.4688	24.5142	24.8945	24.7628	25.809	24.4297	25.1221	25.538				8	8	8	26.9	26.9	26.9	53.879	0	107.03	2100000000	187
24.1467	27.0722	26.693	24.6287	25.1689	25.6814	24.7303	25.8458	25.0137	25.9914	25.1365	23.4382	25.7173	25.1966	26.4953	26.0023	27.0612	24.8884	25.562	26.4338	26.431	25.5989	25.8207	25.8673	25.4091	25.637	25.6525	26.1428	25.5335	25.3832	25.5262	25.2536	25.5289	25.1059	26.4673	25.2891				3	3	3	14.6	14.6	14.6	32.728	0	190.47	2574000000	135
22.1336	21.2712	21.9	22.5683	23.5731	25.2885	23.5932	25.3297	22.5089	23.031	23.1284	23.7275	23.4206	22.0714	21.3558	25.3874	25.4755	24.215	22.8361	25.2034	23.5791	23.7149	25.1067	23.743	23.6865	22.6893	22.4766	22.1351	25.5087	21.9459	23.5375	23.1565	22.7988	22.8	23.2023	23.2707				15	15	15	33.6	33.6	33.6	72.66	0	323.31	644130000	122
27.0027	26.0801	27.7524	26.4861	26.9389	27.7838	27.006	28.089	25.8992	26.3444	26.5849	26.7322	27.0653	26.1716	26.8868	26.5113	25.4703	26.9298	26.7538	28.4484	26.4898	26.9181	27.0076	26.4111	27.0485	27.1798	26.47	26.7704	27.4197	26.9751	26.7166	26.8928	26.3509	26.6676	27.3157	26.4241				15	15	15	37.7	37.7	37.7	87.217	0	323.31	5304600000	335
26.3954	26.0886	25.8165	25.9604	25.9258	25.5731	26.0454	25.7606	25.598	25.9732	25.3382	25.9864	25.7752	25.2622	26.1747	25.1275	24.9789	26.7071	26.4849	26.0489	25.395	26.0548	26.4894	26.2403	26.0196	27.4324	25.3889	26.0364	26.5239	25.6072	25.7351	26.2547	25.4813	25.9078	25.5161	26.5764				5	5	5	16.3	16.3	16.3	59.067	0	55.977	3036600000	159
25.7004	26.8478	27.0848	26.2908	27.1765	26.4267	25.1991	26.0151	25.3925	26.1595	24.399	26.2478	25.3083	25.2464	25.7404	24.4789	25.7611	25.9725	27.1225	26.1248	26.795	27.1539	26.2638	26.7423	26.1615	27.1577	25.1454	25.6583	25.3767	25.954	25.6441	26.1935	25.9142	26.7743	25.9384	26.4234				8	8	8	49.5	49.5	49.5	33.325	0	323.31	3522600000	157
24.3759	25.4971	25.7612	25.5187	24.6235	25.3127	24.9371	23.9992	25.1224	25.1709	25.2671	25.6853	23.2745	24.8959	24.9126	23.9736	25.0363	24.6717	25.574	24.0441	25.2287	23.7036	25.6136	23.9439	25.2346	24.8491	24.9573	24.7984	23.7907	25.1141	24.9575	25.1741	25.2575	24.8374	25.7624	25.6559				9	9	9	21.7	21.7	21.7	80.473	0	54.496	1449500000	124
25.6006	25.9713	25.5968	26.194	26.4721	25.9913	25.6841	25.674	25.4396	25.8353	25.451	26.2273	26.0796	25.908	25.9852	25.8159	25.848	26.3142	26.154	25.941	25.8275	26.0132	26.0799	25.5295	25.869	26.0072	26.1725	25.3932	25.5846	25.7219	25.8138	26.0017	26.1306	26.1557	25.5228	26.1179				18	18	18	21.5	21.5	21.5	158.52	0	299.55	2623900000	309
25.648	25.7407	25.7099	26.1932	26.2033	25.6309	25.6426	26.1436	24.8709	25.3564	25.2235	25.7586	25.5114	25.2112	26.1172	23.668	24.4083	26.1871	25.9964	24.8953	25.614	26.1566	26.2332	26.0657	25.5049	25.5505	25.2578	26.2559	25.5191	25.5895	25.6273	26.2229	24.9722	25.4728	25.265	25.1742				6	6	6	53.3	53.3	53.3	19.043	0	160.46	2436200000	165
25.5403	26.3404	25.9297	25.7045	26.5045	25.2664	25.83	26.0566	25.6745	25.7074	25.9619	26.139	25.8813	25.3346	25.4144	26.0266	25.7398	25.7916	26.4015	25.8074	25.758	26.5234	25.8238	26.5534	25.8159	25.0687	25.0798	26.2472	25.6958	25.5675	25.0067	26.2225	25.2643	25.4922	25.4948	25.4394				4	4	4	33.1	33.1	33.1	17.259	0	323.31	2730300000	197
27.422	27.7121	25.3276	26.2626	25.7254	26.6231	25.8453	26.981	27.4235	26.6729	26.8023	26.2693	26.6192	26.854	26.0021	28.791	27.8433	26.5734	26.1643	26.3634	26.4314	25.2186	27.2666	26.0034	25.376	26.097	26.5789	26.3305	27.2722	26.2183	26.0051	25.9172	25.8272	26.1517	27.8091	27.266				10	6	6	50.4	41.9	41.9	28.218	0	323.31	5049700000	99
25.4767	26.1212	24.6944	26.2102	25.4328	26.8227	25.5199	25.4482	27.6057	26.5647	27.2104	26.4481	25.4372	27.8784	26.6458	26.7001	26.7698	25.6672	25.7525	25.8725	27.2985	25.742	25.7318	25.1173	26.1509	25.7237	27.6579	26.9054	25.4043	27.0942	26.8236	25.0535	27.3134	26.088	25.8211	25.466				6	6	6	16.9	16.9	16.9	61.212	0	323.31	3900700000	156
21.6577	24.0482	24.0956	22.8859	26.3517	22.205	23.121	23.4814	22.1474	24.1121	21.9952	23.5793	23.443	22.5084	24.0901	21.6942	23.0337	22.4987	25.0757	22.6581	25.9165	25.3132	23.0117	23.4864	23.8732	24.6121	23.337	24.0415	21.4527	24.558	23.3462	25.0685	22.9937	23.7297	22.0786	22.4877				4	4	4	10	10	10	76.28	0	323.31	637770000	79
24.5205	24.8412	23.9946	25.1958	25.2262	25.0623	24.7186	24.9529	24.0365	24.7815	24.1822	25.3983	24.1012	25.2459	24.61	23.7565	24.6159	25.3222	24.882	25.0527	24.7306	25.2478	25.3672	24.3418	25.1179	25.0887	25.8924	23.4548	24.3929	24.9577	25.0426	24.472	24.9766	24.9571	25.4926	26.0233				12	12	8	25.6	25.6	17.8	76.758	0	323.31	1309200000	226
30.4359	28.4621	28.4831	28.6719	28.4765	28.7447	28.4803	30.1288	28.2434	29.0447	28.6194	29.0111	29.0822	28.3911	29.3769	28.4845	27.334	29.4687	28.7269	28.5553	27.8156	29.0216	29.6268	29.1376	28.7404	29.1784	28.3014	29.2598	29.8962	28.2348	28.6257	29.5199	28.0994	29.373	29.0232	28.4434				15	15	15	54.6	54.6	54.6	28.723	0	323.31	21884000000	605
32.0066	30.0955	30.948	31.0848	30.9327	31.0122	31.1065	31.8565	30.2502	30.7442	30.1954	30.8575	31.0339	30.8296	30.8413	29.7203	29.4921	31.249	31.0651	30.8798	30.3477	30.6311	31.5684	30.8608	30.4384	31.0495	30.3134	31.2082	31.6972	30.2642	30.5206	31.3269	30.1184	31.079	29.9293	30.1713				11	11	8	64.3	64.3	52.8	22.11	0	234.32	77399000000	447
28.2019	25.6422	26.7338	26.792	26.1038	26.8447	27.4801	27.19	27.0264	26.8554	27.5779	26.8143	27.1161	26.8179	27.1755	27.5437	26.4073	27.0083	26.5636	27.0748	26.666	26.5115	27.4816	27.0245	26.6438	26.4799	26.7252	27.3976	27.2261	26.9865	26.9982	27.0022	26.743	27.299	27.8729	27.5605				8	8	8	55.3	55.3	55.3	31.362	0	323.31	5875600000	303
26.5112	25.5065	25.1774	27.2693	26.1605	26.2406	26.8694	24.9916	29.1367	28.3803	29.4566	27.344	26.9672	27.9369	26.4246	29.7208	28.0964	26.9069	26.5809	24.009	29.0987	27.4037	26.3195	25.0191	27.6891	26.2272	26.3149	26.5556	27.7718	28.0699	27.0815	23.9429	28.7015	28.6336	27.4936	26.9339				8	8	8	60.7	60.7	60.7	24.005	0	323.31	10242000000	433
26.914	25.4291	25.2776	26.4144	26.9045	26.048	26.4824	26.6775	25.9684	25.8908	26.326	26.5554	25.9674	25.5935	25.4778	26.2356	25.4137	27.2718	26.7905	25.3726	25.9793	26.2669	26.5812	26.8467	26.125	26.4847	24.8707	25.9582	26.846	25.0559	25.459	26.1027	24.9635	26.5731	25.5905	26.9307				5	5	5	41.6	41.6	41.6	19.312	0	323.31	3352700000	322
29.589	29.4089	29.2231	29.7568	29.0065	28.288	28.8833	28.4974	27.9654	28.6893	28.2136	28.5977	28.4434	28.4095	28.6242	27.8909	27.5278	29.1602	29.5299	28.3724	28.5333	28.9313	28.8912	29.5206	28.8912	28.6641	27.8116	29.2129	29.1784	28.3501	28.2325	29.2213	27.9399	28.7142	28.412	28.2097				11	11	11	41.3	41.3	41.3	22.46	0	323.31	19305000000	454
27.0772	27.6065	27.6388	27.4785	27.612	27.8037	27.3129	27.5332	28.0773	27.5256	27.696	27.7415	28.1414	27.4585	27.5479	27.638	28.4614	27.9277	27.4634	27.2742	28.0876	27.6029	27.258	27.6587	27.7995	27.8134	28.0385	27.4049	27.2976	27.5214	27.3306	27.5219	27.9035	27.4587	27.5614	27.8486				11	11	11	43.7	43.7	43.7	50.435	0	323.31	9117700000	362
26.8523	27.2822	28.4641	28.0075	27.7389	27.887	27.7225	27.6255	27.1864	28.2162	27.8584	28.3778	27.8145	27.9923	28.7652	27.3239	27.9743	27.1385	27.2857	28.7403	28.0257	27.9733	27.9312	27.5378	28.318	27.6877	28.6537	28.5137	27.8621	28.7895	28.7198	28.0426	28.0768	28.2138	27.7801	27.3579				29	29	29	34.2	34.2	34.2	140.96	0	323.31	10836000000	670
25.2825	24.8402	26.2209	25.0354	24.9578	24.4497	23.8909	23.6938	23.4679	24.5601	24.0967	24.7645	24.3468	24.9148	25.4437	24.2989	24.7768	24.1771	25.9537	24.8174	24.7742	24.9075	24.6998	25.0857	23.8827	25.3691	24.2969	24.5063	25.4328	25.053	25.0021	25.604	24.6611	25.1625	24.4497	23.0936				7	7	7	37.7	37.7	37.7	35.206	0	25.772	1218100000	133
26.2276	23.8529	24.307	25.629	25.288	26.3618	25.7011	25.5395	26.6492	25.3842	26.0344	25.3239	26.1233	26.4564	24.5679	27.6072	28.0839	25.5548	24.8453	24.442	25.9736	25.105	25.6574	24.0408	25.3335	23.8182	24.665	24.8489	25.1928	24.4928	25.3422	23.7844	26.0409	23.2105	25.0699	24.9369				8	8	8	23.2	23.2	23.2	65.33	0	100.18	2757900000	166
25.3577	25.6494	25.5169	25.2445	24.5654	25.1306	25.4117	25.0036	24.6575	25.1808	25.6111	25.277	25.5281	24.5069	25.3422	25.75	24.3363	25.5619	25.7044	24.1191	25.0811	25.1124	25.678	25.4656	25.2116	25.5572	24.6623	25.0224	26.3294	24.5793	24.8198	25.0242	24.5532	25.1149	25.7442	24.7502				4	4	4	32.9	32.9	32.9	25.249	0	275.99	1767300000	172
23.2946	23.8488	25.5281	24.686	24.0052	25.0222	24.718	24.4611	24.51	24.8079	24.729	25.2662	24.9247	24.4104	25.5795	24.1287	23.3504	23.7344	24.3222	25.3051	24.6057	24.9369	25.0106	24.4817	24.5479	24.3577	24.4211	24.2709	24.719	25.4022	25.2686	24.6722	25.1824	24.279	24.9249	23.8656				10	10	10	21.7	21.7	21.7	81.074	0	188.63	1119600000	135
27.1724	26.6424	27.4171	27.6906	27.2443	26.8572	27.1054	23.8783	26.0623	27.0257	26.7033	27.1734	26.4191	26.9212	27.312	26.0926	25.8743	27.3865	27.0559	27.0631	26.2932	27.1959	27.2097	27.1848	26.9956	27.0027	26.3277	27.23	27.5484	26.7477	26.7954	27.6517	24.9431	27.0409	26.0776	27.0989				7	7	4	27.6	27.6	22	46.158	0	183.83	5136800000	196
28.7785	27.9324	28.6415	28.9271	29.1983	28.7858	28.7524	28.8006	28.4833	28.8258	29.3011	29.1905	28.0208	29.4293	29.026	29.0091	29.1294	28.5355	28.5755	28.6458	29.2302	28.8958	28.5274	27.4782	29.0955	29.2659	29.3472	28.7999	29.3056	29.3612	29.3616	28.861	29.2046	28.7932	28.8396	28.1187				111	111	111	40.2	40.2	40.2	629.09	0	323.31	20639000000	1489
26.9005	20.3184	24.8764	25.9898	25.8727	25.4692	25.7687	25.6026	26.2172	25.0292	25.5449	24.3093	25.6925	25.7943	24.7329	24.0327	24.4305	25.4264	25.7024	24.9612	25.794	25.7694	25.0717	26.0343	25.28	25.8446	24.0043	25.1814	25.8408	24.1932	23.7869	25.5692	24.3479	25.8727	25.4033	24.9898				2	2	2	53.5	53.5	53.5	10.741	0	41.704	1632700000	94
26.6862	26.0325	26.9652	26.0408	25.9855	27.1965	27.0822	26.8143	27.0001	26.7979	26.7257	26.4701	26.3097	27.5178	27.1137	26.64	26.1264	26.4147	26.0727	27.3438	25.5575	26.4216	26.1517	26.2592	26.6857	26.7857	27.0613	26.2742	26.4276	26.6649	26.9076	26.3692	26.5449	26.9165	27.3416	26.4432				23	23	15	39.8	39.8	30.6	103.92	0	323.31	4319500000	295
20.8866	20.7606	22.4206	21.6856	22.2264	23.599	22.6543	22.7805	22.5502	23.3817	22.6752	23.672	22.5458	23.0692	22.8161	22.0042	22.8526	20.2468	21.3101	21.5009	24.2262	23.7125	22.3115	22.7436	20.7769	20.9928	24.2153	22.8938	21.2994	24.0624	23.3465	22.1652	23.3281	22.9301	21.7292	22.2048				2	2	2	6.9	6.9	6.9	58.252	0	221.33	294580000	41
23.3347	24.8156	23.782	22.4603	23.8503	23.4687	21.4112	22.4782	23.514	22.9641	22.3386	22.5691	23.3604	22.5661	23.3709	24.2565	24.8798	23.582	24.4049	22.5455	23.0596	23.2621	23.0925	23.9683	23.5836	25.2235	22.5026	23.4198	23.452	23.3869	22.8533	24.1841	23.2539	23.4152	23.829	23.8289				4	4	4	15.2	15.2	15.2	46.382	0	50.351	743670000	135
23.7603	24.0759	23.356	24.1356	24.8089	21.7094	22.8757	23.7308	23.2452	23.8281	23.0149	24.6678	22.8494	22.677	24.164	23.7354	22.7965	24.0449	24.805	24.3772	23.8261	24.2131	23.7484	22.8022	24.581	24.8538	23.597	23.7195	24.2002	23.9827	23.6237	24.6819	23.6108	25.0823	22.6817	23.8806				14	14	14	9.2	9.2	9.2	305.28	0	169.59	637020000	105
21.9162	21.8603	23.947	24.8767	25.1035	23.8431	23.8097	24.1117	23.342	24.2025	23.9961	25.2283	24.0309	24.1388	25.5344	23.2106	24.1909	24.0649	24.3306	24.1808	24.2547	24.6288	25.2149	23.4303	24.5446	21.8786	24.4618	24.3968	24.1071	24.4246	25.3685	25.2461	24.5493	25.1174	22.1079	22.1777				11	11	11	26.9	26.9	26.9	58.848	0	73.571	856510000	138
28.6563	28.4669	28.6187	28.8548	28.5977	28.6823	28.3207	28.2947	28.2898	28.5904	28.3454	28.7413	28.3527	28.3798	28.4449	28.436	28.2975	28.2633	28.688	28.6196	28.1019	28.8906	28.6865	28.7011	28.6868	28.4778	28.3893	28.7923	28.9052	28.5814	28.5457	28.8967	28.457	28.6899	28.325	28.3809				18	18	18	74.6	74.6	74.6	43.062	0	323.31	16018000000	679
27.073	26.4925	27.5045	27.2636	26.7969	26.6926	26.931	26.7152	26.5901	26.8203	26.8352	27.1413	26.0312	26.9159	27.5252	26.3429	25.7769	26.3961	26.7849	27.3508	26.4359	27.0292	27.354	26.5928	26.6784	26.7747	27.0998	27.2319	27.3097	27.1666	27.344	27.4558	26.8162	26.9547	25.9653	26.5509				13	13	13	33	33	33	75.508	0	238.92	5107000000	253
24.8076	23.9653	23.7103	24.1961	24.1515	24.8077	24.8396	25.1223	24.6582	23.6768	24.3489	24.1208	26	23.9895	23.3499	23.7824	22.8776	26.0868	23.7918	23.417	23.3593	24.0407	24.057	24.2033	24.1174	23.9005	23.4207	23.0865	24.9938	22.9433	23.5607	23.9298	22.8357	24.3553	23.7402	24.8956				9	9	9	11.3	11.3	11.3	145.94	0	23.613	856710000	74
26.9513	26.3773	27.4006	26.8459	27.2174	27.5261	27.2636	27.3471	26.2927	26.8005	26.9899	26.8904	27.5478	27.0615	27.0386	26.3528	26.4401	27.2298	26.7933	26.4192	27.4261	27.2987	26.9086	26.7008	26.2968	26.7708	26.5261	26.9721	26.6729	26.4408	26.8151	27.1137	26.7949	26.5699	27.2013	26.9862				8	8	8	40.5	40.5	40.5	35.816	0	323.31	5421500000	275
25.6883	25.8928	26.6842	26.1736	26.5553	25.2164	25.5357	25.9672	25.6575	26.4712	25.3777	25.997	25.8441	25.3084	26.2986	26.1056	25.8259	26.0653	26.5656	26.1754	25.5817	26.7133	26.4788	26.4992	26.3155	26.979	25.6123	26.6568	26.3664	25.7538	25.6689	26.3923	25.2778	25.8279	26.1392	26.1493				13	13	9	32.9	32.9	21.8	55.63	0	201.06	3070300000	315
22.1574	25.128	23.8018	20.9555	23.9706	23.8568	22.9177	23.2369	23.3284	23.418	22.8184	23.9428	23.6315	23.0948	24.2574	24.1069	24.6951	23.716	23.6465	23.6288	23.5221	23.877	22.9277	23.4293	23.7908	24.0642	23.0718	23.3359	23.6892	23.2631	23.4544	23.0967	23.2561	23.5146	23.0079	24.1498				6	6	6	11.7	11.7	11.7	62.328	0	57.367	565740000	76
25.3982	25.3704	25.0446	25.1186	24.3558	24.5722	24.9708	25.8959	24.3325	25.7104	24.6858	25.5156	25.8445	21.6387	24.8435	24.6192	24.3166	25.5074	25.0013	25.2892	23.8267	24.8706	25.2317	25.8568	25.2543	24.9306	24.621	25.2855	26.0482	24.9676	25.0489	25.3745	24.577	25.244	24.5162	24.3429				8	8	8	22.3	22.3	22.3	60.187	0	210.21	1447300000	148
25.2866	26.1355	25.9055	25.4618	25.561	24.9352	24.9332	25.6312	23.8114	25.5012	24.8375	25.5151	25.6681	24.4601	25.3324	26.263	25.8509	25.5577	25.6534	24.8901	25.3005	26.1703	25.6252	25.9169	25.6586	25.9354	25.0766	25.6306	25.5452	25.2673	25.2279	25.9917	25.3118	25.2509	25.31	25.5817				5	5	5	33.6	33.6	33.6	30.837	0	266.47	2162200000	159
23.3542	24.2003	23.5018	23.6567	23.5859	23.4931	23.5758	23.6224	22.3605	23.4869	23.0927	23.6422	23.1614	23.303	23.27	22.893	22.4542	24.098	24.0523	23.4648	23.2483	23.5417	24.0876	23.7782	23.769	23.8703	23.1068	23.2736	23.4117	23.1648	22.7257	23.8138	22.9717	22.961	22.6763	23.7598				6	6	6	14.1	14.1	14.1	80.379	0	65.07	492600000	89
25.5429	26.1665	26.6867	25.8411	25.6513	26.284	25.5281	25.8828	25.2088	26.4082	25.6842	26.1427	26.2502	25.7395	27.0352	25.701	26.261	25.3219	25.985	26.4209	25.9354	26.2608	25.8058	26.1404	26.1674	25.2798	26.5861	26.4871	26.3668	26.4585	26.7246	26.2839	26.4957	26.1778	25.757	25.2642				5	5	3	27.5	27.5	17.4	44.739	0	323.31	2971000000	177
25.1041	27.3729	27.2273	26.9326	25.9498	25.9157	25.4297	25.1802	25.3458	26.6348	25.2544	24.4439	25.4535	25.6761	27.2813	26.5205	26.0478	25.7926	26.6316	25.6163	26.6644	26.2992	26.002	26.7115	26.1982	25.947	24.898	26.967	25.8703	26.5352	25.7374	26.8586	25.7499	25.9438	26.1726	25.5202				5	5	5	34.1	34.1	34.1	30.84	0	246.47	3536900000	129
24.288	23.5309	24.6062	24.3936	24.5318	24.2534	24.2365	24.1327	23.1203	24.2848	23.9073	24.5721	24.1025	24.0772	23.8746	23.4483	23.4551	24.2304	24.3493	24.4178	24.5632	24.7248	24.8455	23.9781	24.4586	25.5316	24.245	24.0423	24.0841	24.4294	24.1808	24.8145	23.8962	24.2681	24.0576	25.1031				6	6	6	37.5	37.5	37.5	35.348	0	88.969	836600000	113
26.2176	25.1411	26.1671	27.0154	26.2686	26.506	28.308	26.0105	27.4236	26.0795	27.5874	26.4618	26.9388	27.8344	26.2103	26.5214	28.4419	26.5949	25.0821	25.1	28.0316	25.8252	25.9128	25.746	26.2921	25.3302	27.7972	26.8642	26.0882	27.0188	26.4878	25.4038	27.8756	26.1697	26.7853	26.3784				8	6	6	39.9	35.4	35.4	30.54	0	87.557	4785100000	150
26.3146	25.2664	25.4654	26.0137	25.7544	25.5386	25.6692	25.9575	25.5797	25.8402	25.3682	25.7294	25.9492	25.2194	25.6661	24.4444	24.7096	25.5356	24.9402	25.5207	24.4649	25.7812	25.7414	24.831	25.2526	25.3	24.6909	24.9264	25.902	25.4884	25.1869	26.013	25.1878	25.7446	25.8793	25.802				13	13	10	43.9	43.9	34.2	58.042	0	247.52	2231600000	307
26.0048	25.4543	25.3821	25.6816	25.1704	25.5497	25.7644	26.1615	25.3343	26.1088	25.2917	25.73	25.4607	24.6873	25.6117	25.1492	24.9138	25.5388	25.6319	26.4365	25.0351	25.6595	26.1908	25.3798	25.3811	26.1185	26.2013	26.1942	26.3742	25.4576	26.1108	26.155	25.5777	25.7804	26.5559	26.1679				7	7	6	45.9	45.9	37.2	20.811	0	323.31	3210800000	294
27.9652	27.0934	27.4403	26.9949	27.9111	27.2303	27.0901	27.4002	27.1066	27.5606	27.0471	27.6968	27.3257	27.0079	27.3694	27.3664	27.006	27.2395	27.464	27.3283	27.4759	27.7078	27.4462	27.515	27.6512	28.366	27.457	27.0304	27.7584	27.4019	27.5709	27.8698	27.3981	28.0327	27.4901	27.8848				21	21	21	35.7	35.7	35.7	100.2	0	323.31	7392700000	452
25.3923	24.9911	24.6585	25.2266	25.6973	23.9842	25.4229	24.7028	24.407	24.4795	24.7741	24.7977	24.6824	24.6419	24.0787	24.9631	23.5797	25.4093	25.0379	23.859	25.1494	25.3433	24.7028	25.2299	24.4648	24.9357	23.4154	24.2616	24.9597	24.5622	24.2036	24.8752	24.2304	25.0078	23.4055	24.277				5	5	5	41.4	41.4	41.4	19.015	0	323.31	1112200000	54
26.3885	25.973	26.4902	26.6826	25.1223	26.574	26.2831	26.2092	25.1981	26.0382	25.5806	25.5641	25.4409	25.8533	26.3672	25.6766	24.5603	26.1666	26.9286	25.4886	25.947	25.8635	26.5605	26.7494	25.8968	26.0387	25.5984	26.0143	26.3665	25.1514	25.6664	26.2612	25.3597	26.75	25.5432	24.9301				5	5	5	25.8	25.8	25.8	25.542	0	21.976	2728300000	117
27.3808	26.5562	27.1521	26.5637	25.9877	25.9056	26.0114	25.9215	24.9184	25.0553	24.9762	25.4878	25.4141	26.3665	27.0699	24.9514	23.8108	26.7874	26.3936	26.7343	25.0089	26.0567	26.6005	27.0839	26.1856	25.1039	24.49	26.6065	26.3191	24.5163	25.7144	26.5878	24.9412	27.1797	25.7269	25.0167				5	5	4	17.6	17.6	14.3	31.263	0	45.393	2889300000	86
27.2424	27.5713	27.2485	27.5119	27.6673	27	26.9291	26.8538	27.0476	27.695	27.0827	27.6965	26.3965	27.6325	27.714	26.9265	26.395	27.2822	27.7119	27.3415	27.3804	27.1598	27.5811	27.3452	27.4394	27.7345	27.4337	27.3603	27.5886	27.572	27.2859	27.7467	27.1256	27.9503	27.3357	27.0001				19	19	19	46.1	46.1	46.1	88.549	0	323.31	7400600000	589
26.1441	25.8406	26.3769	26.7585	26.312	26.2966	26.6588	26.3107	26.2829	26.3659	25.9516	26.364	26.5518	26.0544	25.9769	25.6589	26.2155	26.6472	26.3104	26.4492	26.2683	26.6838	26.8257	27.076	25.99	25.6444	26.09	26.365	26.5143	26.1378	26.0842	26.813	26.2225	26.2842	26.655	27.2425				8	8	8	26.8	26.8	26.8	52.164	0	294.58	3811000000	341
26.0429	24.6285	25.4959	25.3349	25.3312	25.3583	24.9545	25.6204	25.1871	25.6331	25.3743	24.5757	25.4627	24.9003	25.2602	24.8921	24.4349	25.5012	25.3369	25.3426	24.8721	25.3195	25.3773	26.0941	25.7587	25.4041	24.9403	25.6475	25.3291	25.344	24.6106	25.8702	25.0211	25.3372	25.8447	25.788				8	8	8	43.7	43.7	43.7	36.501	0	39.961	1812600000	280
25.363	25.1167	25.6858	25.4297	25.2775	24.9904	25.3423	25.1627	24.4882	25.7953	25.1684	25.7	25.22	25.5449	25.9264	24.2162	25.3565	25.2076	25.4139	25.5062	25.5615	25.779	25.4359	25.787	25.7121	25.8914	25.0385	26.133	25.9151	25.4858	25.4042	25.9991	25.1467	25.6897	24.3416	24.9215				9	9	8	33.3	33.3	31	46.404	0	160.63	1949500000	175
28.2977	27.4839	27.1643	27.8574	28.0422	27.291	27.8863	27.7321	27.1942	27.6585	27.804	26.5493	27.1036	26.7924	26.4864	26.9833	26.503	27.8589	28.3804	27.0299	26.4183	28.7133	28.2141	27.9937	27.1674	28.2721	25.79	27.6548	28.4021	25.9668	26.5568	27.3229	26.0868	27.2527	26.4185	28.5398				6	6	3	49	49	21.1	16.495	0	61.421	8330400000	273
24.7914	24.1892	24.8226	23.77	24.4174	23.7808	24.0372	24.3071	23.3982	23.8633	23.8445	23.5752	23.9829	24.1693	23.9821	25.6215	26.4696	24.5337	25.1111	23.5648	23.7002	24.0129	24.1159	24.6915	23.9581	24.0147	23.1333	24.5232	24.7071	23.674	23.1964	24.5582	23.855	23.9587	24.5554	23.7132				3	3	3	23.5	23.5	23.5	19.198	0	323.31	859480000	82
23.6008	24.3735	24.1564	24.0375	24.6182	24.4886	23.8357	24.3605	24.1834	24.1291	24.5995	24.173	24.374	24.832	24.07	24.0561	24.7745	24.538	23.7014	23.8871	24.9983	23.6714	23.7716	23.9106	24.1443	24.3427	25.1503	24.0293	23.6523	24.2034	24.3848	24.2341	23.9884	24.1868	25.2652	24.8393				9	9	9	25.7	25.7	25.7	51.419	0	20.167	951820000	223
25.0412	24.8398	24.9205	26.4746	25.1299	24.8382	25.5172	25.3346	24.7118	25.0482	24.7669	25.3331	25.2728	25.6229	26.0006	24.4096	24.5214	25.3663	25.98	25.8187	24.6885	25.3621	24.9804	26.8391	25.1018	24.7048	24.9791	26.4698	25.1628	24.8387	24.6195	25.7695	25.0782	25.4649	25.3162	24.9158				3	3	3	16.6	16.6	16.6	20.63	0	172.34	1698900000	61
22.095	22.4868	23.2291	22.7723	23.5672	22.5285	21.3232	23.6075	21.6616	23.2747	22.2288	24.3038	23.8596	23.3732	23.1825	23.0451	21.6881	22.7315	23.4142	24.5779	22.8472	23.645	23.9105	22.3862	23.8167	24.1545	23.8005	22.5495	23.2381	23.4671	23.5241	23.2591	23.225	23.8997	22.856	23.3181				14	14	14	11.7	11.7	11.7	243.4	0	323.31	407280000	138
24.4484	25.1741	26.252	24.8746	25.6356	23.6593	24.1788	24.8727	22.4698	25.0435	24.5174	25.4043	23.3616	23.1843	24.2271	24.4497	23.9873	25.2464	25.5272	24.7035	24.3663	25.7555	25.0082	25.7041	25.2626	25.5816	24.0146	24.8358	25.3751	24.1443	24.7572	25.3113	24.1053	25.1652	23.2191	23.978				7	7	7	13.4	13.4	13.4	97.691	0	64.782	1205900000	134
27.7355	25.2043	25.4216	25.7897	25.1796	26.6826	26.4338	26.2222	25.854	24.8465	25.2989	25.2737	25.67	24.8668	24.6413	25.5083	25.2628	26.019	25.3383	25.1764	25.4278	24.9023	26.1522	26.2567	25.5867	24.8576	23.2053	22.9742	26.6737	24.7137	24.0498	26.089	24.2777	24.8616	25.5401	25.0083				7	7	7	23.8	23.8	23.8	46.503	0	222.69	2218600000	149
25.211	24.9185	25.5808	25.0858	24.4277	25.2836	25.3715	24.5471	24.4366	24.3348	24.4003	24.8803	24.4127	23.4256	23.3924	25.4369	24.8803	24.8885	25.3132	25.0825	24.4001	24.9864	24.826	25.334	25.0717	25.4637	23.6555	24.5648	25.6522	23.8875	24.1805	24.8089	24.1095	24.5309	27.2325	26.2461				4	4	4	40.5	40.5	40.5	18.243	0	26.595	1595500000	102
23.692	25.2717	25.0524	24.2834	23.4543	23.6387	23.8175	24.1322	23.0467	25.142	24.0108	24.4661	24.073	23.4623	25.306	23.3917	24.6638	24.1083	23.9453	24.6275	24.3886	23.6359	24.1465	24.0208	24.2989	24.5434	24.5198	24.8476	23.9299	24.9407	24.8536	24.9645	24.6275	24.3187	23.7708	22.9295				6	6	2	23	23	7.9	54.127	0	323.31	905700000	141
25.3318	25.754	25.5938	25.927	25.4776	25.9714	25.5041	25.4518	25.6271	25.4374	25.5095	25.7893	25.4276	25.4369	25.6914	25.5624	26.6733	25.8271	25.5501	25.604	25.6853	25.8	25.3322	25.189	25.7536	26.017	25.8129	25.3779	24.962	25.8335	25.423	25.7047	25.8992	25.8591	25.1151	25.8801				9	9	9	31.9	31.9	31.9	44.23	0	323.31	2220400000	219
24.3871	24.5886	24.2637	24.3787	24.2691	24.0883	23.8246	24.4569	23.5346	24.7302	24.0608	24.5427	24.2208	23.8505	24.5776	23.589	25.0457	22.8525	24.1933	24.1957	24.0604	24.7064	24.3149	24.1791	24.0429	24.2426	23.756	24.3632	24.6152	24.1409	24.1416	24.6546	24.0768	24.3776	24.2221	23.2461				7	7	7	26.3	26.3	26.3	59.42	0	230.27	789120000	127
25.884	25.3211	24.8971	24.3594	25.4292	24.8677	25.2469	25.7028	24.9506	25.1169	24.9662	25.5999	24.8424	25.1136	25.857	25.6841	25.6243	24.9524	24.386	26.1626	26.4578	25.3376	24.9953	24.8403	26.1557	26.6506	25.1781	25.0158	25.9445	25.2016	25.2243	25.6067	24.9624	25.7104	24.7042	24.8217				25	24	24	25.5	25	25	180.58	0	323.31	1747300000	328
25.5427	25.2955	25.8687	24.8713	25.6295	25.5999	26.2801	26.2658	23.9316	25.6935	25.2219	25.2853	25.546	25.9071	26.1439	24.6978	24.3936	25.5535	24.1346	25.4063	25.3496	24.0465	24.9195	25.4569	25.6406	25.0454	25.8212	25.0077	25.5032	25.2382	25.6446	26.1751	24.3826	25.2714	25.3665	24.5449				9	9	8	26.3	26.3	24.1	51.812	0	323.31	1790300000	134
26.4334	26.1875	26.0421	26.4535	26.0372	25.7856	25.948	26.2665	25.5778	25.8087	25.1372	26.1625	25.7138	25.9266	25.9924	24.1479	24.1851	26.5048	26.7132	25.1822	24.0456	26.8056	26.5793	26.1959	26.0944	25.7719	25.1454	26.6595	26.6808	24.9746	25.4519	26.554	25.002	26.3499	24.171	26.8021				6	6	6	24.9	24.9	24.9	35.892	0	155.39	2743500000	137
22.5748	24.8341	25.2619	23.9251	24.2112	25.1465	23.7698	23.9601	24.5503	24.6521	25.2039	25.0792	25.0616	25.0627	25.2556	26.398	26.7197	23.5318	24.1497	25.0758	25.6518	24.839	24.0846	23.5045	24.8834	24.5767	25.9365	25.0099	23.6765	25.7068	25.4671	23.8581	25.6635	24.7037	24.7657	24.5936				9	9	9	24.8	24.8	24.8	80.702	0	44.601	1529900000	204
27.1425	28.2636	27.8099	27.7775	28.2814	27.6331	27.0398	27.2261	27.1647	27.982	27.2088	27.6606	27.0967	27.6306	28.4715	28.5364	28.0092	27.6434	28.2767	27.9149	27.9737	27.924	27.1472	27.4161	28.3607	28.9917	27.8541	27.9425	27.4058	28.4973	28.2848	28.0602	28.007	28.0338	26.9817	27.8836				57	57	57	33.4	33.4	33.4	282.28	0	323.31	10580000000	993
27.0083	27.3709	28.0915	27.482	27.607	27.3799	27.7523	27.2653	27.2791	27.8792	27.2564	27.5735	27.7486	27.3563	28.0121	26.9463	27.1278	27.7093	27.793	28.2862	27.3973	27.5573	27.804	27.9098	28.1045	28.3984	27.7017	27.9626	27.7969	27.8053	27.9311	27.9128	27.6125	27.457	27.7126	28.3565				17	17	9	55.8	55.8	33.9	48.991	0	323.31	9209200000	453
23.7703	24.1077	23.6034	23.9276	23.6396	23.327	23.5989	23.4416	22.5621	23.6498	23.3199	23.1864	24.0391	23.1534	23.4655	23.7755	23.727	21.7151	23.521	23.1919	23.8231	24.6856	22.9388	24.1431	23.9349	23.4495	21.9706	24.0838	23.8567	23.0705	22.8934	24.1141	22.7088	23.6798	23.1617	23.3502				4	4	4	20.3	20.3	20.3	33.702	0	52.118	517130000	146
28.8542	29.4199	29.0491	28.5146	29.0445	26.834	27.2494	28.0403	26.577	28.8019	27.1509	28.5469	28.2959	27.0293	29.0368	27.6461	26.9399	28.6897	29.4449	28.2841	27.8791	29.7495	28.8777	28.8014	29.1111	30.2877	26.9391	29.1443	28.912	28.1705	28.4966	29.5542	27.5757	28.957	26.4101	27.6497				13	13	13	39.6	39.6	39.6	66.646	0	323.31	16409000000	294
27.377	28.0447	28.2736	27.5482	27.9873	26.6986	26.4005	26.8877	25.9204	27.3814	26.9095	26.4907	26.7954	26.4596	26.3595	26.7712	26.9045	26.9106	27.9369	26.7354	27.1877	27.8368	27.0609	27.8437	27.6692	26.9231	25.7552	27.7631	26.9708	26.5831	25.9147	27.6344	25.9435	26.8697	26.5634	24.5485				3	3	3	26.7	26.7	26.7	18.648	0	323.31	6477400000	170
29.1812	29.107	28.411	27.8545	27.8232	27.6753	27.8739	29.039	27.4449	28.7247	28.2009	28.7232	28.5843	27.449	28.2321	28.32	27.722	28.8664	28.6443	28.1199	26.9038	28.3085	28.6631	28.8861	28.4157	28.9608	27.4167	29.0242	29.3147	27.7166	27.0598	28.3477	27.8049	28.0206	27.7691	27.4606				7	7	7	59.2	59.2	59.2	15.945	0	323.31	19020000000	1628
28	27.4716	28.35	28.1262	27.1307	27.394	27.4006	27.9423	26.9927	27.9797	27.0218	27.6664	27.1167	27.1362	28.6153	27.0751	26.7617	26.8736	27.379	28.3096	26.9859	27.4502	27.9535	27.654	27.4184	26.9849	28.0175	28.2152	27.2634	27.9065	27.9304	28.0407	26.9752	27.5298	27.6481	26.3338				7	6	6	26.1	23.5	23.5	32.834	0	301.85	9657300000	320
23.515	25.1049	24.6094	25.1533	23.9861	25.43	25.2081	22.9914	23.636	22.6752	25.5948	25.3672	27.2624	26.6768	26.8917	26.7243	27.2343	24.2507	24.1665	24.9467	25.3429	23.6337	23.6582	23.3084	25.0725	22.032	26.3301	24.8916	23.6796	26.3479	26.1179	23.019	26.0387	24.3646	24.9807	22.6112				12	11	11	15.9	15.1	15.1	140.86	0	311.45	2008000000	106
26.5166	25.3855	24.5509	24.5584	23.6196	25.7027	26.302	26.7021	22.556	25.1699	24.9459	25.6446	22.9192	20.3352	24.4017	23.5235	22.7055	26.5655	26.5687	24.2859	24.2272	25.425	26.1856	25.7488	25.3164	24.2782	23.9249	24.5072	26.4272	24.508	23.7986	25.6982	23.5406	25.5877	22.5285	21.2858				8	8	8	61.1	61.1	61.1	22.326	0	97.31	1816400000	226
26.6127	27.0036	27.0703	26.0526	26.752	24.4007	24.8576	26.5905	23.6139	26.9508	25.755	26.9119	26.0151	25.1221	27.0802	25.2655	26.1695	26.1461	27.208	26.3322	26.5586	27.0069	26.5123	26.8321	27.1735	28.2269	26.2895	26.9534	26.9149	26.7459	26.5441	27.435	26.0272	26.7941	25.9272	25.833				8	8	5	32.6	32.6	23.9	48.872	0	323.31	4032400000	159
26.7705	27.7588	27.5304	27.5769	27.8915	27.0751	26.9556	26.9905	26.5267	27.507	26.8969	27.5441	27.0928	26.8186	27.1492	27.5656	27.5322	27.1002	27.7689	27.6935	27.4129	27.7837	27.6927	27.185	27.8246	28.2646	27.7138	27.1893	26.982	27.7164	27.5401	27.7276	27.3783	27.5042	27.3229	28.0259				20	20	20	21.1	21.1	21.1	166.57	0	323.31	7682100000	501
22.5475	25.2862	24.6425	25.3473	25.2307	24.6716	25.3674	24.3851	25.0013	25.0786	24.7407	25.2893	24.6018	24.7721	24.0263	24.402	24.432	25.0241	25.0166	24.9232	25.0857	25.2511	25.0655	24.9792	24.9496	24.4225	25.1227	24.6737	24.7422	24.6261	24.8461	25.0347	24.905	24.9693	24.1651	25.3958				9	9	9	16.3	16.3	16.3	103.17	0	323.31	1276500000	202
25.2675	25.9465	26.5005	26.2341	25.3081	25.9483	24.1733	25.3132	27.1571	26.8983	26.4804	26.5748	26.163	26.7767	26.5163	26.0088	27.0786	25.1139	25.8633	25.5761	26.9231	25.9097	25.2377	24.3825	25.9988	24.9789	27.8721	25.7812	24.6512	27.0619	27.2271	25.293	27.5535	26.6634	25.5703	25.5704				18	16	15	43.7	38.5	37.4	73.91	0	323.31	3860600000	325
25.2047	25.2431	25.1683	24.1999	25.0534	25.0916	22.903	25.0617	24.8084	25.1804	24.3464	25.7338	24.7354	24.9032	25.6177	23.6499	21.3543	23.7643	25.4498	25.2324	25.6346	25.3932	25.1397	24.9953	25.0736	25.7066	25.4659	24.9257	24.5867	25.3534	25.5809	25.2961	24.7687	25.4862	24.8816	25.3609				16	16	16	23.4	23.4	23.4	136.82	0	323.31	1367100000	195
28.0298	28.4502	28.5442	28.353	28.8258	28.5335	28.2336	28.4945	28.5196	28.3137	28.3544	28.4553	28.5885	28.5564	28.5851	28.5313	29.0945	28.6167	28.135	28.8139	28.7562	28.5368	27.9642	28.1547	28.4615	28.704	29.0993	28.2949	28.1446	28.58	28.7381	28.2984	28.7235	28.3387	28.718	28.6955				101	101	101	34.1	34.1	34.1	532.4	0	323.31	16574000000	1642
25.1928	24.928	24.7302	25.1508	25.4848	24.4611	24.8905	25.2388	24.7597	25.0306	24.8562	25.068	25.3043	24.5295	24.9897	23.9002	24.1393	24.6749	25.9392	25.3668	25.0144	25.0328	25.107	25.2138	25.4342	25.5752	24.94	24.6678	24.4815	25.3111	24.823	25.41	25.2297	25.8621	25.9229	25.5258				14	8	8	56	38.1	38.1	46.402	0	323.31	1881500000	174
24.8038	24.5097	25.0341	24.3145	24.8047	24.5077	24.3563	24.7764	23.6772	25.0694	24.4886	24.2484	24.9506	23.8141	24.4182	24.2423	23.492	25.2396	25.2995	24.629	24.4998	24.9931	24.358	23.7521	24.4603	25.6232	23.5201	24.3991	24.9525	24.2277	24.3465	24.6779	24.1385	24.9606	23.8489	24.3683				8	8	8	24.1	24.1	24.1	44.049	0	16.718	1009300000	118
24.5596	25.4225	25.6562	25.876	25.7864	25.1232	25.3716	25.0501	24.8303	25.7397	25.1238	25.9107	25.3319	24.9932	26.0188	24.5345	24.3137	25.1484	25.3397	25.9553	25.8879	25.1806	25.5703	25.8618	26.1336	25.2355	25.5837	25.6184	25.2107	25.7853	25.7881	25.7604	25.4757	26.0879	24.9415	25.4162				11	11	11	32.6	32.6	32.6	58.656	0	323.31	1894000000	189
23.4456	24.0426	23.8518	24.7636	24.2768	23.3469	23.1088	23.2836	21.6123	24.6538	23.6728	25.2025	21.8067	22.1576	23.7431	23.332	21.2498	23.3061	23.977	24.6991	24.4216	24.4603	26.0511	24.0776	24.8034	23.5327	24.0887	23.3061	21.991	24.0166	24.3631	24.2379	23.9838	23.8915	25.1726	24.711				16	16	16	27.2	27.2	27.2	92.888	0	323.31	737910000	122
24.9403	24.3259	24.7248	24.8663	25.0247	24.609	24.3121	24.4833	24.3522	24.9236	23.8412	24.8412	23.9764	23.5616	24.4215	24.3479	22.232	24.6021	24.8929	24.6843	24.7016	25.2559	25.1406	25.2708	24.9442	25.4748	23.7506	25.1247	25.2186	24.4721	24.5111	25.0961	24.2942	25.4747	24.1661	24.6917				11	11	11	40	40	40	47.219	0	260.64	1071700000	189
24.9422	25.2291	24.3797	25.0212	24.9077	24.5317	24.7517	24.5177	24.2294	24.5556	24.3914	24.6753	24.7396	23.2509	24.0381	23.2433	22.7489	24.5328	24.9757	24.8242	23.9525	24.6072	25.071	24.9631	24.662	25.4615	23.6056	24.4401	24.6439	24.178	24.0046	25.0277	24.2931	24.958	23.3815	25.19				7	7	7	13.5	13.5	13.5	87.133	0	65.688	966810000	94
28.9595	28.6259	29.0383	28.7959	28.8767	29.2131	29.496	29.0855	29.6106	28.8313	29.4219	28.7697	29.2344	29.8264	29.2696	29.2795	28.8926	29.5633	28.6067	29.2408	29.1417	28.9829	28.8773	28.7901	29.1699	28.5348	29.3072	29.3812	29.3302	29.0678	28.9351	28.7691	29.1812	29.1159	28.8146	29.3609				30	30	30	51.4	51.4	51.4	106.87	0	323.31	24627000000	883
25.0189	25.6278	25.8759	24.2961	25.3193	25.3307	24.1134	25.3858	24.0723	25.9416	25.2522	24.693	24.9129	23.9441	25.5352	24.8336	24.2935	24.9188	24.7945	24.0109	25.5738	25.6809	24.9971	25.0482	24.5233	25.9121	24.2713	25.3852	25.4276	25.0863	25.1388	25.7421	24.1503	25.3359	24.9102	24.5564				4	4	4	17.1	17.1	17.1	63.145	0	106.09	1398400000	107
28.9778	27.8374	28.1799	27.4406	27.8645	24.9891	27.2675	27.2906	24.9924	27.0396	24.3125	26.133	25.0216	24.2146	27.333	26.4167	24.735	28.1606	28.1168	26.026	25.856	28.337	28.1288	27.9457	26.3234	28.4404	21.2922	25.7047	28.9734	25.4586	26.1426	27.7708	26.0441	27.9504	23.2647	27.0999				4	4	4	35	35	35	21.196	0	112.51	6312100000	95
30.1279	29.6273	29.4352	29.96	30.3997	29.4069	29.1167	29.901	29.1064	29.5569	29.1531	29.5908	29.3059	29.1173	28.9538	29.6382	28.9267	30.0665	29.8002	30.1803	29.3072	29.657	29.8233	29.2686	30.0003	29.7245	29.2436	28.9705	30.1293	29.1654	29.6013	29.8732	29.0895	29.8473	29.3802	29.9262				35	35	35	56.9	56.9	56.9	99.326	0	323.31	35651000000	1685
22.5735	24.2938	24.8247	24.1059	24.5373	23.8453	23.9608	23.9985	22.4597	24.3817	23.7389	24.2524	23.7828	23.1767	24.6947	24.1049	24.7108	24.133	24.3468	25.2789	24.2717	24.4418	23.7482	23.3502	24.6353	23.8845	24.7111	24.4351	24.1828	25.1608	24.7897	24.6126	24.4931	24.412	23.7111	23.4898				18	18	14	17	17	13.6	218	0	84.931	926110000	164
26.6885	27.3734	27.3507	27.4452	27.5699	27.1445	26.9648	27.6241	26.5129	27.5314	26.8985	27.8738	27.0533	27.2272	27.8213	26.7919	26.4002	27.6086	27.2433	27.5248	27.3611	27.2251	27.5749	27.3783	27.5039	27.9851	27.325	27.521	28.061	27.4804	26.8417	27.5861	27.0281	27.651	27.2823	26.9748				3	3	3	16.1	16.1	16.1	29.717	0	323.31	8584800000	225
24.3744	25.3155	24.1524	23.7834	24.4296	24.1121	23.9735	24.4068	23.9076	24.3077	24.4493	24.5578	24.2921	23.4633	24.2294	25.1569	25.9225	23.2337	24.0297	24.2646	24.3562	25.3843	24.7176	25.2017	24.3253	24.131	23.6852	24.4966	24.8231	23.6915	23.5774	24.7919	24.4888	24.3446	24.4672	24.0072				2	2	2	10.7	10.7	10.7	22.35	0	39.197	982880000	87
27.2129	24.0974	23.3153	24.5789	24.7825	26.868	26.905	27.2703	26.0525	25.3265	25.8441	25.5361	24.2148	24.8907	24.0348	25.0277	24.9938	26.488	25.3238	25.4253	25.5973	23.5432	27.4044	26.1198	23.8475	23.5743	24.8243	24.9623	27.2731	25.1919	24.2673	25.7064	24.6276	25.9547	25.9607	23.912				3	3	3	8.6	8.6	8.6	62.642	0	323.31	2618600000	87
28.0716	29.0376	28.259	28.3551	28.625	28.5622	28.0689	28.5651	28.1005	28.5396	28.3044	28.7537	28.4814	28.1102	28.5947	28.9372	29.2004	28.3288	28.4901	28.6468	28.6058	28.6095	28.6732	28.5946	28.4173	28.5239	28.7579	28.5778	28.5724	28.6438	28.3906	28.5629	28.3062	28.552	28.5795	28.8363				27	27	27	48.6	48.6	48.6	97.169	0	323.31	18658000000	1089
25.3944	25.9611	26.7119	26.1534	26.5558	25.8879	25.9642	25.9016	25.665	26.7354	26.1242	26.792	25.9534	26.0634	27.2462	26.5646	25.8716	25.7688	26.1916	26.6095	26.3498	26.5094	26.4411	26.2244	26.8557	26.5591	26.8108	26.6592	26.5687	27.0931	27.0153	26.628	26.499	26.4252	25.3054	25.7928				25	25	25	21.3	21.3	21.3	238.26	0	323.31	3765300000	436
24.8195	24.5189	25.2492	24.721	23.4221	25.3004	24.082	24.979	24.6934	24.553	23.5837	24.9213	24.4847	24.3826	24.2096	26.5986	25.6771	25.0639	25.0929	24.8186	25.074	25.337	25.3076	24.3169	25.2353	26.1812	24.2584	24.3685	25.6789	24.2646	24.5241	23.7167	24.8477	25.131	25.1345	25.507				10	10	10	33.4	33.4	33.4	45.531	0	179.11	1340800000	162
26.9568	27.5818	27.8817	27.5606	27.2611	27.6106	27.0811	27.3048	26.9514	27.5955	27.2809	27.3894	27.4212	27.3377	27.4417	26.548	27.847	27.0278	27.6498	26.9271	27.2245	27.2919	27.5661	27.3286	27.2096	27.2784	27.2552	27.4805	27.1256	27.4932	27.4571	27.6649	27.2289	27.3207	27.4624	26.7772				10	10	9	46.5	46.5	42.1	41.487	0	323.31	7154700000	347
23.8611	24.5215	24.9147	24.6924	24.8351	23.8709	23.967	24.1178	23.9047	24.3511	23.8241	24.8921	24.0507	23.4152	25.6668	24.5136	23.5919	24.083	24.7875	25.0068	24.1816	24.9213	25.1507	24.0483	25.0781	24.9382	24.5943	24.8258	24.948	24.8707	25.4734	25.0377	23.9498	24.8866	23.7368	23.9968				10	10	10	13.4	13.4	13.4	109.93	0	323.31	990990000	138
23.3322	25.804	26.3308	25.7975	26.0122	25.871	25.413	25.5916	25.2087	25.9274	25.5842	26.4604	25.7435	25.2548	26.1129	26.5288	26.0349	24.9068	25.3978	26.5334	25.8082	25.8338	25.8095	25.2507	26.3136	25.8694	26.3099	26.197	25.9293	26.2951	26.2876	26.139	25.9644	26.1359	25.5366	25.5283				23	23	23	38.5	38.5	38.5	105.38	0	323.31	2743000000	404
22.8291	23.9686	24.3857	23.5997	24.3711	24.0413	22.5957	24.4473	22.9715	23.9054	23.2532	23.8618	23.6614	23.0148	23.8625	25.205	24.5951	24.4757	23.8087	23.8713	23.7326	24.0241	23.9009	24.0854	24.1391	24.9362	23.6577	23.7234	23.7294	23.6242	23.6437	24.124	23.5495	23.7587	23.116	23.8223				9	9	9	25.7	25.7	25.7	52.901	0	21.627	668010000	137
25.8793	25.4192	25.5641	26.1285	25.9193	26.2205	25.681	26.8188	23.7627	26.347	25.741	26.4508	26.3299	25.1316	26.4243	26.1383	26.3262	25.8123	26.4628	26.6393	26.0315	26.8494	26.4808	26.2013	26.3703	26.7689	26.0179	26.1986	26.1777	25.9359	26.4304	26.8094	25.6262	26.1219	26.2306	26.376				15	15	15	29.1	29.1	29.1	68.047	0	323.31	3079000000	219
27.7569	27.1271	27.2667	27.9106	26.7343	25.2684	27.6094	27.4756	27.1711	27.5318	26.6996	27.6075	27.3274	27.4165	27.6197	26.408	26.0247	27.133	27.7177	27.6153	27.2181	26.9994	27.5073	28.1996	27.2338	27.2345	27.1996	27.7244	27.616	26.8431	26.9858	27.3574	26.217	27.4402	27.7932	27.1924				6	6	6	38.6	38.6	38.6	25.2	0	170.81	6675800000	138
23.5103	22.9183	23.0829	25.2118	23.9066	25.2286	24.83	24.2011	26.024	23.5591	24.6505	24.1388	24.6378	26.0281	23.6117	24.8526	24.4738	24.8958	23.2028	24.5827	24.4738	23.8608	22.8294	24.4307	23.6624	22.7864	24.4713	21.6766	24.2408	23.4554	23.9416	23.4573	24.3458	23.9501	25.8985	26.0158				11	11	11	45.1	45.1	45.1	39.031	0	108.82	893660000	177
28.5057	28.4261	28.7082	29.2771	29.1762	29.5438	30.032	29.0054	29.144	29.0184	29.3759	28.8795	29.0561	29.9348	28.3664	29.6292	30.0107	29.0947	28.3127	29.0108	29.2435	28.6141	28.6724	28.4866	28.6342	27.8184	29.5466	28.5145	28.5065	28.889	28.8272	28.0418	29.1843	28.1647	29.6665	29.6601				15	15	15	46.5	46.5	46.5	47.837	0	323.31	23566000000	521
26.2289	26.5923	25.6395	26.5602	25.5067	26.2297	25.9138	26.3362	26.9565	25.7551	26.8405	25.6197	26.4043	25.7068	25.2189	27.1054	26.5408	26.8023	26.272	25.7844	25.7578	25.4583	26.4819	26.8167	26.0097	26.4274	25.8647	25.9653	27.0442	25.5548	25.6551	25.9833	26.3784	25.261	27.4692	26.4671				5	5	5	54.6	54.6	54.6	15.04	0	323.31	3642700000	200
24.2372	26.2147	24.4331	24.9332	24.7811	24.5767	25.0502	24.7456	24.2013	24.4623	24.5042	24.8333	25.1091	23.3111	23.672	24.1862	27.6699	25.5865	25.3397	24.0488	23.9676	23.64	24.9059	25.5434	24.763	24.9176	23.5642	24.2308	24.4682	24.4225	24.5858	24.2876	24.1613	23.9673	24.8341	25.1928				7	7	7	52.1	52.1	52.1	21.995	0	146.31	1954500000	126
29.068	27.1446	26.3609	27.7011	26.931	28.3801	27.9837	29.5481	27.5016	27.697	27.4702	27.8783	28.2463	26.4781	26.6955	26.9465	26.3167	29.0975	27.3721	27.8866	27.5661	27.0296	29.004	27.5359	27.6923	26.3101	27.6265	26.7535	29.1613	25.4927	27.0354	27.9748	27.334	27.4872	28.0787	27.5511				14	14	14	57.1	57.1	57.1	32.66	0	323.31	10546000000	460
25.9231	25.7478	24.4581	26.279	25.0288	25.8018	25.8387	26.3014	25.3724	25.5641	25.5902	25.4916	25.6431	25.428	25.6148	25.1568	24.7132	26.3015	25.9657	25.4161	26.1694	25.7902	26.613	25.6082	25.1119	24.6429	24.8821	24.2023	25.6426	24.7674	24.6523	25.8671	25.3504	25.5617	26.0369	24.7907				4	4	4	35.3	35.3	35.3	16.476	0	28.138	1995500000	87
27.4176	28.13	28.5867	28.5333	27.7262	27.6427	27.9251	27.6988	27.3427	28.4624	27.8152	28.4508	27.8602	27.0399	28.6812	27.619	27.3956	27.6073	28.0488	28.6644	28.7415	27.8085	28.0146	28.0917	28.1178	27.4891	28.8287	28.3464	27.5938	28.3304	28.3106	28.4617	27.7905	28.2847	28.5824	27.7142				8	8	8	34	34	34	54.231	0	323.31	12974000000	307
25.0481	23.9908	24.6786	23.8446	23.6834	25.2224	24.2065	25.5285	24.6375	24.7059	24.4299	24.2255	24.8545	23.9763	24.2493	24.033	24.6155	25.0106	24.4978	25.148	24.8258	24.3639	26.2629	24.8556	23.5935	24.6039	24.7455	24.6937	25.5102	24.1364	24.1915	24.1648	24.4075	22.0167	24.2798	25.6104				9	9	9	53.6	53.6	53.6	36.775	0	32.317	1111000000	103
27.9019	27.626	28.7396	28.4571	28.4729	28.0756	28.2273	27.9426	27.8936	28.335	28.03	28.5617	28.3252	27.9787	28.5053	28.4784	27.9974	28.1619	28.4204	28.5909	28.2516	28.5095	28.587	28.8167	28.7705	28.6705	28.3504	28.2738	28.3957	28.3668	27.9463	28.4241	28.4454	28.5582	28.5675	28.3013				14	14	12	76.1	76.1	68.3	37.497	0	323.31	14532000000	553
26.1661	24.0688	25.0266	26.039	24.6348	25.1515	25.6509	25.2691	25.0591	23.9869	25.1814	24.9031	25.296	25.0424	24.6573	24.7407	23.5946	25.7883	26.1266	23.9197	25.3749	25.5212	25.5807	25.8317	25.2595	24.7124	22.964	24.3875	23.8366	24.8284	24.3776	25.6559	25.3884	25.0974	24.2897	25.303				3	3	3	64.6	64.6	64.6	10.832	0	130.51	1742900000	113
24.2741	24.0205	23.8399	23.7116	27.691	23.6741	23.9363	22.7554	23.3515	23.3839	23.7315	25.0143	23.4041	23.3913	21.8551	23.2349	23.0869	24.0358	24.0627	22.9064	26.7366	24.9162	23.3677	23.5485	23.7257	24.2341	22.5044	23.3065	24.0432	22.6587	22.7164	24.1374	23.0311	23.7044	24.008	24.2185				3	3	3	60.2	60.2	60.2	13.133	0	54.22	1148200000	265
25.3746	25.4416	26.5119	26.5818	26.7388	25.8094	26.1063	25.8776	25.6533	26.4412	26.03	26.6734	25.6935	26.2433	26.9426	25.4579	25.8011	26.2546	26.1045	27.0827	26.4486	26.2777	26.7299	25.5419	26.8387	26.507	26.5618	26.4843	26.4218	26.9693	26.8957	26.4469	26.3211	27.0483	25.7445	26.043				19	19	19	28.9	28.9	28.9	135.58	0	323.31	3404400000	333
26.4129	25.5465	25.602	25.3893	23.5335	26.2525	25.8316	25.9583	25.1873	25.1752	25.258	25.5174	25.8208	25.5322	25.65	25.509	25.7935	25.3581	25.5306	25.3626	25.8694	25.3931	25.8574	25.3421	25.0947	24.7168	25.6436	25.3044	25.5483	25.1459	25.2366	25.4835	24.6006	24.8988	25.2669	25.2782				9	9	9	56.3	56.3	56.3	31.54	0	183.95	2032000000	143
25.966	25.9807	25.2865	25.3944	26.3819	24.9218	25.4704	25.0506	25.1432	24.559	25.3394	25.1644	23.7701	23.887	25.186	24.8325	24.3908	25.6412	25.566	25.0697	25.23	25.5912	25.7329	25.1358	25.6663	26.3273	24.0509	25.0496	25.7776	24.5627	24.6737	25.5751	24.9513	25.5963	24.7165	25.7337				6	6	2	14.7	14.7	5.7	95.18	0	323.31	1787100000	178
24.8416	25.5646	23.92	23.5455	23.6741	23.247	24.2388	24.3873	23.7232	24.2527	23.9703	24.3451	23.8668	22.975	24.3018	25.3487	25.0794	24.443	23.8783	24.0627	24.4849	23.6643	23.8776	24.6869	23.7082	22.4042	23.6636	24.6168	24.4911	23.8933	23.4646	24.6027	23.9388	23.7293	24.4862	23.329				6	6	6	25	25	25	44.385	0	140.52	910950000	128
28.0185	27.6402	26.775	27.4193	27.4897	27.5376	27.5485	27.4324	26.2407	27.2614	26.8238	27.8032	27.1772	26.4558	26.6544	27.4536	26.516	27.456	27.3209	26.6999	26.7667	27.5557	27.6288	27.0943	26.963	26.9554	26.5238	26.9404	27.5709	26.8448	26.8684	27.4832	26.7607	27.0873	26.9888	27.0773				15	15	15	62.2	62.2	62.2	41.564	0	323.31	6333500000	322
25.4677	25.9823	26.0985	26.4586	26.073	26.009	26.1843	25.87	26.7049	26.1029	26.3474	26.1066	25.9294	26.6267	25.9293	26.3292	26.2462	26.08	26.1625	26.1128	26.5568	25.8976	25.8467	26.0379	25.993	25.9151	27.0562	25.7548	25.5412	26.2557	26.096	25.6935	26.8509	26.1267	26.1415	26.3409				18	18	15	43.3	43.3	40.4	86.16	0	323.31	3460800000	418
23.8634	24.7447	24.5414	24.59	24.2095	24.5832	24.9481	24.1602	24.3231	23.8178	24.7844	24.1846	24.279	23.8961	23.792	24.564	24.745	24.5791	24.2929	24.6911	24.5861	24.3726	23.8327	24.5272	24.1793	24.088	24.517	24.3095	24.2693	24.5726	24.0815	24.1899	24.5233	24.1138	24.5863	23.006				14	11	11	30.9	26.2	26.2	86.478	0	283.4	901980000	203
24.9285	25.2552	25.1802	25.5684	25.9329	25.4059	25.2764	24.5899	24.8675	25.6146	25.1224	25.792	25.0796	25.9203	26.2107	24.7407	24.2822	25.5455	25.3228	25.5422	25.9264	25.201	25.9276	25.0077	25.6926	25.2632	26.0897	25.6764	25.7065	25.8918	25.3367	25.7646	25.4617	26.1275	25.0567	25.3076				11	11	11	21.3	21.3	21.3	88.885	0	148.2	1874800000	174
29.0295	28.7998	29.1798	28.1411	28.5572	29.8063	28.8621	28.5752	30.4799	29.9313	30.5294	29.3752	29.2946	30.5674	29.5453	31.1182	30.161	28.884	28.3227	30.3407	29.1098	28.6746	27.8865	29.0837	28.6455	27.9448	29.9338	29.7466	27.8341	30.7989	30.5217	27.3395	30.541	29.0869	30.8548	28.2774				16	16	16	37.5	37.5	37.5	74.68	0	323.31	40161000000	1517
23.6826	26.1736	25.5989	25.6441	25.3098	24.5983	25.0423	24.9104	24.1328	24.7214	24.0738	25.346	24.8127	22.9528	24.3525	25.5645	25.8101	24.9533	25.4953	24.9933	24.5896	25.3561	25.0246	25.6072	25.1552	24.9993	24.4206	25.1255	24.8407	24.2822	24.9367	25.6302	24.3928	24.5695	24.9249	24.7375				10	10	10	44.9	44.9	44.9	34.247	0	177.29	1503000000	164
26.3265	25.2086	26.0947	25.2826	26.5761	25.9417	24.7656	25.691	25.6713	25.4808	25.5796	25.3834	25.4695	25.9033	26.2011	23.8199	26.1982	25.1846	25.9883	25.6072	26.1671	27.0115	25.7227	26.1749	25.8075	27.3247	25.5065	26.2257	24.8293	25.3413	25.3804	24.6461	25.5057	26.7759	26.172	26.4362				10	10	10	41.7	41.7	41.7	26.183	0	323.31	2384600000	206
25.1642	26.2515	25.9671	25.724	26.1121	25.7673	25.3928	24.6521	25.0936	25.4225	24.9539	25.5717	24.9423	24.6675	25.5416	25.3377	25.6511	25.0008	25.5527	25.6804	24.9099	23.7918	25.7939	25.6285	25.4389	25.9304	25.5183	25.5272	25.8506	25.8615	25.7608	25.8029	24.6768	25.3766	25.6723	25.6821				8	8	8	20.5	20.5	20.5	61.888	0	113.36	2322700000	164
26.7379	26.791	26.6407	26.9714	27.3603	26.3589	27.0566	27.1332	26.487	26.8623	26.5955	27.3317	26.55	26.1337	26.6966	26.3656	25.6952	27.4601	27.381	27.1297	26.9148	27.6079	27.603	26.6232	26.9839	27.1442	26.8368	26.8748	26.6022	26.6006	26.324	27.3395	26.2774	26.5121	26.683	26.4246				7	7	7	50.7	50.7	50.7	29.999	0	323.31	4788300000	214
26.3175	27.1021	27.3438	27.1029	26.882	26.5597	26.5687	25.4888	25.4772	26.5785	25.8307	26.6946	26.1482	26.23	26.6913	25.9823	25.4754	26.5257	26.9404	26.6895	25.5456	26.3648	26.8795	26.765	26.4225	24.853	26.1347	27.01	26.4931	26.2867	26.5671	27.1577	26.1285	26.0561	26.6321	25.986				6	6	6	24.8	24.8	24.8	36.091	0	265.59	3869300000	175
23.5837	23.4076	24.0479	23.6266	24.0002	24.4243	23.9794	24.3418	24.2816	23.7835	24.2277	24.0069	24.3176	24.5452	24.5711	23.217	23.4302	24.5397	23.8458	23.2395	24.1899	24.2674	23.8286	24.0073	23.7025	23.6421	24.2719	24.0507	24.2907	23.9605	23.5968	24.0732	23.9165	24.0437	21.499	22.5437				10	10	8	16.9	16.9	13.6	80.409	0	25.96	681440000	95
27.8433	27.3894	27.0569	27.2247	26.9775	27.4409	27.1964	27.7956	27.3392	26.9967	27.1317	26.6183	27.2335	27.4439	27.1966	26.6594	27.0837	27.3359	27.2675	26.4235	27.2352	27.1321	27.0982	27.4255	26.824	26.9657	26.39	27.3729	27.4031	26.2841	26.9426	27.0365	26.8294	27.2181	27.4881	26.9862				9	9	3	53.7	53.7	25.7	24.488	0	307.12	6214300000	352
25.0926	25.938	22.8959	25.521	25.2532	24.2653	24.2466	26.1376	25.3753	25.712	25.3686	25.7179	26.1214	25.6156	26.1479	25.1292	26.5005	25.2987	25.5818	25.7786	25.5811	26.0253	25.8977	25.7268	26.2765	25.5422	26.324	25.6591	26.3386	25.9704	25.9671	25.8296	25.7996	25.8175	24.5131	25.1814				6	6	6	19.8	19.8	19.8	61.277	0	323.31	2496800000	152
25.7955	27.0343	27	26.6417	26.9343	26.2686	26.4378	25.8557	26.2365	26.0522	26.2004	26.5445	25.0103	26.0202	26.3164	26.5502	26.3425	26.8081	26.7005	26.0998	26.1576	27.0916	26.4722	26.5167	26.6633	27.0965	26.2215	26.466	26.4695	26.3978	26.3221	26.4768	25.9218	26.3804	25.2941	26.302				16	16	16	53.6	53.6	53.6	56.195	0	323.31	3680300000	332
24.9393	26.0058	25.6378	25.1288	25.8296	25.0295	24.8589	24.9476	24.6625	25.1345	24.1784	25.554	25.2378	24.8979	24.9172	24.1805	24.4017	25.6827	25.6014	24.6888	24.689	25.9294	25.5474	25.5106	25.5983	26.0253	24.4323	24.7146	25.776	24.809	24.8043	25.5536	23.9849	25.3188	24.5789	25.7395				12	12	12	23.1	23.1	23.1	104.67	0	247.52	1615100000	194
23.9631	23.7457	24.3071	24.2041	24.2602	24.2541	24.5174	24.4505	24.6376	23.892	23.1595	24.1569	24.552	22.0168	22.4755	23.8313	24.1824	24.358	24.2386	24.2019	23.8905	24.332	23.6114	24.065	24.0373	24.1091	23.9881	24.2262	24.4504	23.7836	23.0176	24.2713	23.6918	24.0812	24.4125	24.586				8	8	8	35	35	35	41.293	0	21.285	687210000	125
26.3147	26.1053	24.99	26.2835	25.968	25.1236	25.9335	25.9604	25.5005	26.2862	25.8921	26.7384	25.9589	25.9334	26.1303	25.9589	25.285	26.1255	26.1482	25.8212	25.315	25.5412	26.1423	26.0642	26.1035	26.4732	26.4808	25.9185	26.279	25.8707	25.913	26.5761	25.8303	26.1709	26.9229	26.0968				7	7	7	30.4	30.4	30.4	44.468	0	273.52	2841700000	180
28.8001	28.4511	28.5383	29.1082	28.5673	29.3229	29.1579	28.8461	28.9382	28.9529	29.315	28.979	29.0159	29.3742	29.1143	28.5328	28.8078	29.2933	28.4453	28.7604	29.1353	28.6877	28.614	28.3792	28.8444	28.3086	29.1838	28.9555	28.9135	29.0779	28.9319	28.6532	28.9888	28.7272	29.5436	28.9741				21	21	18	60.5	60.5	51.9	62.293	0	323.31	23193000000	835
25.4676	25.563	25.6259	25.9378	25.0836	24.6353	25.6449	25.116	24.2534	25.6311	24.9574	25.6187	24.982	24.9088	25.9692	25.2438	23.8392	24.8684	26.1338	25.6124	25.2077	25.3466	25.5154	25.4437	25.579	25.3242	25.3575	25.7303	25.5599	25.5917	25.4991	26.0705	25.1862	25.8574	25.3239	25.2732				5	5	5	15.3	15.3	15.3	52.325	0	323.31	1973200000	139
27.2553	27.7076	28.5352	27.5016	27.7023	28.142	23.1929	25.4248	28.1703	28.6851	28.764	28.6599	26.6759	28.4242	28.4692	27.7867	27.8168	26.1566	28.1421	27.8452	27.8779	28.9705	29.2509	27.9828	28.5848	27.4008	28.5084	28.0327	27.2866	28.4558	29.0859	27.8963	29.1659	29.1843	28.4498	28.6868				10	10	10	32.3	32.3	32.3	54.529	0	323.31	12090000000	298
25.1358	24.2155	26.2799	24.142	23.4985	25.077	25.0028	25.2867	23.6052	25.8542	24.9925	24.7813	24.8794	23.9155	26.4458	24.2962	23.895	23.9507	24.5225	26.9509	23.9895	25.7288	25.431	25.2941	25.2668	25.8227	25.4816	26.2621	25.0764	25.4328	26.1768	24.8844	25.2908	24.9371	25.373	23.7042				13	13	13	25.1	25.1	25.1	75.935	0	210.98	1761300000	158
25.0507	25.7901	25.5946	25.2018	24.9941	25.7954	25.6298	26.1482	22.7105	24.8271	25.1517	25.1191	25.3263	25.0956	24.8144	26.7243	25.9405	25.6264	24.7081	26.1812	25.2143	25.3768	24.6178	25.1218	25.1822	24.0969	24.951	25.8189	24.9573	25.8223	25.6582	25.1318	24.8726	24.6586	25.068	23.4946				7	7	7	32.2	32.2	32.2	34.994	0	160.31	1786200000	125
24.7093	23.9444	22.2909	22.4364	22.8049	24.2276	23.0008	23.8141	24.0008	23.0004	22.6223	23.3865	22.7323	22.8614	22.3897	21.8294	23.5305	24.2731	23.2379	24.833	23.3045	22.1544	23.8819	23.5546	23.0034	23.4854	21.2669	22.653	23.5237	22.0947	22.2337	23.5838	22.0604	22.7834	24.654	22.3576				8	8	8	19.6	19.6	19.6	52.351	0	38.745	492440000	104
27.5637	27.4269	26.4402	26.9705	26.9544	27.2927	27.6575	27.0774	27.7507	26.9714	27.1551	27.1736	26.5743	27.5756	26.7538	27.8324	26.4079	27.1345	26.7216	27.0373	26.6901	27.1389	26.5783	26.7615	27.2982	26.8516	26.7579	26.6659	27.1016	26.5072	26.4201	26.9212	26.4013	27.3188	27.3788	27.3005				15	15	2	44.7	44.7	2.8	55.676	0	323.31	6450800000	416
28.2323	27.4998	26.2436	27.1534	26.9671	27.0977	27.4039	27.8124	27.3129	26.0009	26.8403	26.6954	27.0632	26.4938	25.6472	26.5531	25.9511	27.6292	26.8263	26.7698	27.4644	26.8511	27.4213	27.4466	26.6301	26.0318	25.2388	26.5884	27.5077	25.1837	25.4557	26.6196	25.5064	26.6495	27.3895	27.0465				6	6	6	72.3	72.3	72.3	13.37	0	323.31	5036000000	236
25.947	25.5071	25.8714	25.8724	25.9534	26.0566	25.8819	26.0357	25.6298	26.6534	25.9212	26.8998	26.1661	25.5138	26.775	25.3376	25.2421	25.1977	25.4423	26.7005	26.2181	26.2679	26.3194	25.5203	26.5161	25.8777	26.4879	26.6955	26.2312	26.761	26.4286	26.5512	26.3451	26.1359	25.0687	24.0893				11	11	11	22.8	22.8	22.8	85.104	0	323.31	3357000000	291
21.3547	23.8957	23.9115	22.4988	23.3653	23.412	22.7808	22.6084	22.4843	23.1272	22.8485	23.6374	22.6685	22.578	23.5505	22.7159	24.0129	21.602	22.7132	23.848	23.1753	23.1699	22.6034	22.3961	23.2909	22.8464	23.6443	23.4387	22.4044	23.5554	23.7839	22.7936	22.8816	22.9186	21.7633	21.69				7	7	6	7.9	7.9	7	150.83	0	77.38	368710000	113
23.3886	23.6323	23.6081	23.631	24.1826	22.4501	23.665	23.3719	22.4537	23.829	23.2279	24.6806	23.239	22.7921	23.7094	22.8798	22.9632	24.088	23.2409	23.8479	23.5297	24.3423	23.6317	23.2917	24.2788	23.2905	23.4288	23.7339	23.5132	23.6229	23.3876	24.0665	23.1912	24.4979	22.2678	23.4004				6	6	5	13.3	13.3	11.9	93.577	0	45.978	501640000	93
25.4089	25.1237	24.7242	25.1725	25.1692	24.6416	24.3502	25.5094	24.9402	25.3295	25.0535	25.1116	24.3433	24.2087	25.1985	25.2012	24.7429	24.9428	25.2715	24.2649	25.3792	25.206	25.0944	25.4298	25.1021	25.5419	24.3604	25.6126	25.516	24.6401	24.4173	25.6903	24.8171	24.6461	24.4184	24.6968				7	7	7	44.4	44.4	44.4	27.598	0	200.63	1476900000	237
22.4754	24.1119	25.0247	23.3275	23.849	22.8862	21.583	22.844	21.9053	23.171	22.4881	23.7289	23.1877	22.5808	23.5341	23.5347	22.5051	22.3665	24.3374	24.4236	23.9612	23.4385	23.3099	22.11	24.6721	24.3862	23.3877	23.8776	22.1996	23.1216	23.5811	23.7051	23.2089	23.4016	21.9742	22.5319				9	9	9	17.1	17.1	17.1	95.196	0	222.09	480220000	110
26.2246	26.5316	26.0875	26.252	26.7946	25.6003	25.4851	25.3792	25.5952	26.3073	25.5804	26.5517	26.0952	24.7662	25.6764	25.8856	25.5244	26.1729	26.5831	25.3524	26.3766	26.7455	25.9143	25.9711	26.2295	26.74	25.5645	26.2462	26.1244	25.8504	25.8912	26.7347	25.5988	26.2474	25.4933	26.8351				15	15	15	45.6	45.6	45.6	58.946	0	293.68	2848100000	341
23.6784	25.479	22.5117	23.9506	25.0323	23.0644	23.9214	24.0121	24.1194	23.9429	24.0352	24.1098	24.088	23.0176	23.7775	24.108	24.6622	23.4675	22.8776	23.7639	22.832	24.1287	23.8571	23.9347	23.6559	24.4306	23.199	24.0157	24.1306	23.4143	23.0004	23.965	23.0508	23.4945	23.1819	23.7584				6	6	6	14.1	14.1	14.1	79.548	0	117.77	702300000	112
25.6308	26.3105	26.9897	26.3961	26.5616	24.9285	25.4108	24.4844	24.78	26.259	24.9371	26.4154	26.1047	25.0516	26.804	25.576	25.8207	25.2522	27.1248	26.6431	25.6108	26.5553	26.148	26.7193	27.0483	27.3186	25.3875	26.985	26.3094	26.4355	26.2519	27.2759	25.4051	26.1118	24.9402	25.1129				9	9	9	27.5	27.5	27.5	50.576	0	93.902	3091500000	183
23.703	24.45	24.5192	23.5436	24.4887	25.0585	23.0895	24.2118	22.7081	23.3108	22.893	24.0382	23.9844	21.9765	23.2011	24.3815	23.176	24.8174	24.0978	23.6059	24.263	23.8306	23.5472	23.9914	25.1111	25.2665	22.5523	22.671	24.849	22.5792	22.1826	24.483	23.3969	24.2487	21.9264	22.8268				14	14	14	24.7	24.7	24.7	110	0	112.69	723580000	112
25.7333	26.1823	25.5913	25.7485	26.5579	23.6644	24.8208	25.2398	24.1342	25.3413	25.2306	25.3564	25.4143	22.3816	23.892	25.2334	24.4906	26.2674	26.8379	23.8277	25.0523	25.9964	25.5146	26.4287	25.7915	26.5752	22.7813	25.3444	26.302	24.9004	23.9415	26.1701	24.4977	25.4753	24.0852	24.3284				4	4	4	36.2	36.2	36.2	12.217	0	323.31	1847000000	70
24.9532	23.4858	23.4759	24.4525	24.2979	23.7121	23.1185	24.7422	23.016	24.004	23.5014	24.3845	23.9781	24.029	23.754	23.583	22.7789	24.8435	24.1413	23.3458	23.3673	23.4248	25.0694	23.7	24.3725	22.7322	22.7162	23.5503	24.8383	23.4746	23.3397	24.6525	22.9877	24.6383	23.8681	23.9197				10	10	10	36.4	36.4	36.4	39.028	0	36.287	640440000	83
25.0423	25.4065	25.2898	25.4182	25.7269	25.1424	25.031	25.0522	24.4559	24.3246	24.5085	25.5243	25.5133	24.0942	24.5041	24.2859	24.2199	25.4009	25.6787	24.7841	24.8461	25.1003	25.4965	24.9734	25.3296	25.7524	24.2315	23.9292	24.8629	24.5848	24.6157	25.8613	24.4968	25.2604	24.6068	24.317				6	6	6	25.3	25.3	25.3	46.571	0	100.48	1414600000	145
23.9095	22.2753	24.789	24.0758	24.4354	25.212	24.5616	24.9399	24.9484	24.1021	24.0984	25.0375	25.825	24.485	24.4925	23.061	22.3737	25.1448	24.2313	25.5503	24.6576	24.2682	23.266	24.4709	24.7083	21.7	25.0224	23.4389	24.4964	23.5645	24.3518	24.7825	24.3099	25.0569	24.866	22.5269				12	12	12	31.6	31.6	31.6	72.048	0	62.936	1002100000	190
23.5416	24.7022	24.0664	23.668	23.932	24.7565	23.8073	24.1343	23.2453	23.6539	23.4977	24.2496	23.811	23.6027	23.0041	23.7706	24.8132	23.9815	23.7741	24.8737	24.6353	23.6138	23.716	23.7293	24.2325	24.6478	24.5871	23.2528	23.8875	23.8377	23.7323	24.24	24.0184	24.2635	23.7991	24.3751				22	22	22	19.7	19.7	19.7	204.29	0	215.33	714200000	169
23.2926	22.0589	21.559	23.3848	23.816	23.5078	21.8334	21.7821	24.3694	23.2866	24.1719	22.4825	22.9876	24.0423	21.1175	23.1993	24.7394	22.559	22.5113	20.8991	24.2499	21.3805	21.9027	22.4744	23.1109	22.8378	23.317	21.535	22.5488	22.6678	21.8445	21.1645	23.2654	22.6748	23.749	23.3667				2	2	2	11	11	11	52.761	0	64.05	366110000	68
27.2611	27.3733	27.8836	27.3933	27.8816	27.6958	27.9519	27.9845	26.5895	28.2049	27.2498	28.3031	27.9464	26.1558	27.721	27.5107	26.5387	28.1721	26.8389	28.8805	27.2122	27.9967	28.2451	27.7091	28.0224	27.9463	27.7035	27.6258	27.9567	27.8363	27.5571	28.0377	27.859	28.4462	27.2386	28.1745				100	100	100	28.4	28.4	28.4	591.4	0	323.31	9346300000	1283
23.5699	24.1154	23.9092	23.5938	23.6559	23.8966	24.341	23.7325	23.6605	23.5237	24.1727	23.7765	24.0054	23.7797	23.7754	23.4311	23.0702	23.7406	23.5054	24.209	23.8344	23.7454	23.4599	23.3574	23.9662	23.4977	23.6699	23.3994	23.3795	23.3399	23.392	23.0175	23.3724	23.5046	23.1165	23.6549				10	10	2	15.1	15.1	3.7	144.94	0	173.9	531290000	123
26.0252	25.9159	26.4612	25.8359	26.0305	26.3741	26.3056	25.8462	26.5287	26.3124	26.0942	26.6691	26.1851	26.0601	26.4189	25.071	25.8295	25.8259	26.4532	26.161	26.1984	26.1517	26.0981	26.3948	26.1349	26.7547	26.0992	26.332	26.1184	26.3169	26.3997	26.2508	26.1407	26.9315	25.8489	26.3812				14	14	14	26.9	26.9	26.9	112.21	0	323.31	3011500000	238
23.5446	26.5187	25.7877	24.641	25.1833	24.7279	23.9342	24.9767	23.4306	24.2608	23.8329	23.9711	25.0256	23.5707	25.1353	25.2358	25.0218	24.6389	25.4449	24.9708	24.5413	24.755	24.2805	25.2374	24.929	25.0304	24.174	25.0596	24.2452	24.582	24.54	25.3208	24.0262	24.4977	24.0916	23.8926				8	8	8	15.9	15.9	15.9	87.608	0	323.31	1330200000	159
27.2624	26.8486	26.8466	27.0639	26.9957	27.1888	27.4626	27.1243	27.4527	25.856	27.1228	26.4967	27.2198	27.2329	25.9737	26.7145	27.5894	27.6725	26.934	26.1491	27.2932	27.0607	26.9972	27.3322	26.5656	26.3764	25.6876	26.9	27.025	25.8629	25.7369	26.9218	26.5048	26.4401	26.6814	27.2205				8	8	8	70.8	70.8	70.8	17.745	0	218.35	5287300000	253
28.4275	27.2029	27.3187	27.5681	27.6674	27.5749	27.0654	27.9232	27.3225	27.539	27.3748	27.1831	27.8428	26.9083	27.4872	26.929	26.3446	27.6693	27.3651	27.3936	27.179	27.8518	27.6046	27.8415	27.2981	27.8286	26.8428	27.4605	27.9368	26.8845	27.2214	27.9164	27.0953	27.5513	27.4972	27.4163				10	10	9	45.3	45.3	43.3	39.548	0	323.31	7498800000	329
24.1837	24.6966	25.3244	24.8606	24.6211	24.6376	24.4715	23.5762	23.8666	24.991	24.4932	24.6131	25.0163	23.0045	24.4171	24.7141	24.6229	24.3579	24.9951	25.2958	24.6812	25.0161	24.3713	24.8653	25.2367	24.9149	24.6766	25.1845	23.4641	24.5009	24.6088	25.1271	24.2274	23.859	23.8899	23.2975				8	8	8	29.2	29.2	29.2	67.942	0	249.09	1052600000	139
21.4387	24.5478	24.2585	24.1971	24.6914	23.2525	24.2495	24.3705	23.3001	25.2403	23.8499	25.5346	22.5286	21.1585	24.5503	23.8549	24.945	24.6186	23.4849	24.7543	24.7159	24.9428	24.2745	22.59	24.727	23.6628	24.2396	24.5816	23.9908	24.892	24.7691	24.497	24.0663	25.1476	24.224	24.499				14	14	14	20.9	20.9	20.9	151.66	0	112.59	790450000	143
24.4585	25.743	26.9748	25.7696	25.6546	25.3758	24.9016	25.6006	24.521	26.0383	25.5961	26.3419	25.8436	25.4676	26.8629	26.264	25.6516	24.0726	25.2802	27.178	25.9483	25.5931	26.025	21.5961	26.7653	25.9487	26.6105	26.4059	26.0059	26.818	26.7539	26.2971	25.808	26.3037	25.5181	22.9946				39	39	39	25.6	25.6	25.6	273.6	0	323.31	2759000000	352
25.1157	25.514	24.9482	24.2127	25.7941	25.9342	25.8363	24.4525	26.1509	26.55	26.1485	25.4019	25.9113	25.5937	25.6582	26.8588	26.1704	25.6632	25.4639	25.6045	25.0473	25.5863	25.9285	25.1708	25.6596	25.9408	25.761	25.9198	25.8044	25.7406	27.0932	24.7035	26.39	25.5547	25.2351	24.2321				8	8	8	37.8	37.8	37.8	46.804	0	80.543	2532800000	125
23.5766	24.7844	25.0387	23.2737	23.5249	25.2785	24.5775	25.4874	22.8449	24.0323	23.8823	24.8482	24.3304	23.8187	24.5342	24.1507	24.6513	24.359	24.9589	26.1942	23.7635	24.0097	23.9732	24.3083	24.4415	23.1602	23.7521	24.5837	24.2268	24.5251	25.0554	23.8077	22.9333	24.1444	23.0275	22.8583				6	6	6	25.5	25.5	25.5	46.626	0	162.3	920460000	88
26.6544	26.795	26.2326	26.5457	26.9478	27.4829	27.8959	27.0819	27.4183	26.8067	27.1707	26.8816	27.3393	26.961	26.4317	27.233	26.0384	27.5963	23.9604	25.5371	25.9089	27.3206	25.8141	26.2466	27.0305	26.8214	25.4876	26.4783	26.949	26.8536	26.759	26.6988	25.7649	27.3213	26.3735	28.1712				18	18	18	57.4	57.4	57.4	57.578	0	323.31	5056800000	494
21.1094	23.3798	26.2604	23.6502	24.4539	23.52	20.7136	22.4132	21.4496	24.8848	23.12	23.9569	23.3335	21.3611	25.774	21.7912	20.0993	23.0225	25.4371	25.7923	25.3637	25.5307	24.6883	24.8663	25.2139	24.825	24.8857	24.9483	22.5368	25.0683	24.1982	25.2271	23.7562	25.5594	24.5327	25.7757				26	26	26	13	13	13	353.61	0	323.31	913170000	219
22.1697	24.8141	24.8991	23.5463	24.3496	23.0992	21.7255	24.1541	22.8144	24.6475	22.9466	24.0536	23.6466	22.9754	24.9474	24.6191	23.5805	23.3972	24.7604	25.0112	23.6213	24.5649	24.0647	22.1533	25.294	25.2773	24.5853	24.8282	23.9806	24.2564	24.4519	24.7036	23.0965	24.9131	22.9983	21.8656				22	22	22	10.2	10.2	10.2	403.08	0	288.12	757310000	193
23.8601	24.5299	24.036	24.849	25.4493	23.657	24.1439	24.8797	24.41	24.2353	24.1654	25.0696	24.1917	24.8751	23.9619	24.2531	22.3699	24.8644	24.5485	24.1764	23.8019	24.4106	23.8777	24.5372	24.626	25.2406	23.8517	23.9802	24.5953	23.6896	24.5434	25.4408	23.7001	24.1085	22.725	25.3629				13	13	13	17.1	17.1	17.1	128.82	0	164.58	896570000	98
26.8417	28.1574	27.2954	25.6794	24.9757	26.1057	25.6009	27.0062	25.5639	26.9852	25.9261	26.8453	28.0633	25.571	26.9826	28.2667	26.5043	24.0959	26.3015	27.8781	28.8508	25.6658	27.2677	27.4779	26.1264	25.1625	26.7856	27.4187	26.8905	27.4257	26.4159	26.475	27.0597	26.944	26.4804	24.258				4	2	2	38.2	24.3	24.3	15.388	0	323.31	7860400000	70
26.7799	25.6636	27.1042	27.0329	26.5149	26.9189	26.9158	26.8006	26.0284	26.8708	26.8164	27.2003	26.6986	26.8114	27.135	26.8482	26.333	26.0962	26.1894	27.5712	27.2697	27.0477	27.1822	27.16	27.0592	26.7842	27.729	27.0165	26.1905	27.155	27.4533	26.9295	27.2912	27.0096	26.7505	27.1444				24	24	24	40.9	40.9	40.9	102	0	323.31	4985100000	326
24.9536	24.3527	25.1927	25.4717	24.9848	24.9684	24.1469	24.7387	24.0975	24.9186	24.6791	24.9491	24.2736	24.6411	24.4189	23.9047	24.2785	24.6632	24.9768	25.2628	24.3738	24.5803	25.0858	24.9506	24.9904	26.4951	25.0271	24.3257	25.09	24.9576	24.5671	25.2177	24.5216	25.2951	25.0732	26.7496				4	4	4	20.4	20.4	20.4	40.538	0	235.35	1369500000	102
25.7367	24.7524	24.7088	25.4206	25.1017	25.1707	24.8958	24.9569	24.4734	25.2945	24.7493	25.0225	25.0136	24.866	25.0989	24.6358	25.3034	24.9555	25.4371	25.2603	25.4722	25.382	25.1917	25.8443	24.9875	25.9165	25.2156	25.2765	25.5114	24.7199	24.7952	25.6406	24.8592	25.3156	25.6123	25.4479				8	8	8	33.4	33.4	33.4	42.502	0	275.5	1604600000	223
23.6419	23.9567	24.8022	24.1119	24.2518	24.1865	24.5815	23.4271	23.8742	23.696	22.8325	23.7638	25.4372	23.0532	24.0707	22.8002	24.5119	24.8043	24.7634	24.139	23.681	23.7265	23.4984	23.2194	23.6025	23.1953	23.4282	23.9502	23.1874	23.5789	23.8004	25.0056	23.1311	23.865	23.1737	24.2562				7	7	7	21.6	21.6	21.6	53.288	0	40.325	695310000	96
25.2615	24.895	26.0292	25.3898	26.1118	24.9866	25.3896	25.0559	25.1062	24.5212	24.8789	25.6868	24.6467	25.1309	25.6311	24.4101	24.7184	24.2859	26.1459	26.2563	25.938	26.0746	25.0999	25.305	26.1237	26.4059	25.2343	25.0172	24.9879	25.1714	24.168	24.8466	25.2075	25.4785	24.3265	26.2519				10	10	10	18.3	18.3	18.3	101.43	0	323.31	1742900000	146
23.9986	23.7644	23.3051	22.3968	23.5967	23.8073	24.3386	22.5916	23.4545	23.3782	23.5386	23.6855	23.8727	24.8125	22.7985	22.6964	22.9022	24.9671	22.2882	23.6158	24.0405	24.0778	23.2829	22.4533	22.1805	23.17	23.5164	22.6326	22.9441	22.4109	23.106	23.8269	23.116	23.3936	22.4534	23.5173				5	5	5	16.9	16.9	16.9	56.527	0	111.13	452740000	68
25.7946	26.1301	26.0664	26.5285	27.2872	25.7191	26.7354	25.5718	25.0726	25.5778	25.3995	26.0013	25.9358	25.7526	26.2164	25.638	23.9738	26.0884	26.4183	25.5708	25.9533	26.8816	25.9674	26.2058	25.7781	27.399	24.9841	26.3259	25.8586	26.0083	25.9895	26.0919	25.3981	26.1011	25.2654	26.0613				10	10	10	65.6	65.6	65.6	25.913	0	113.83	2600800000	196
24.8343	25.4306	25.5408	25.3253	25.3522	24.6912	24.9544	25.0141	24.3731	25.5491	24.3012	25.5347	25.1997	24.3948	25.1975	24.4831	24.3135	25.4418	25.7471	25.1501	25.4053	25.7337	25.1599	25.1655	25.4979	26.1881	25.0439	25.4681	25.3314	25.0727	25.1801	24.6095	23.9388	24.34	25.0268	24.8909				10	10	10	27.8	27.8	27.8	73.182	0	207.62	1549700000	171
25.8522	26.5918	25.7825	25.8639	26.7729	25.7868	25.4464	24.9715	25.5242	25.8942	25.9787	26.657	25.0943	23.3063	24.8163	25.9927	27.0843	25.9009	26.6051	25.6865	25.5642	26.1297	26.3005	25.3361	26.3428	26.8335	26.4938	25.4918	25.9792	25.8747	25.885	26.1697	25.6525	26.1035	25.5179	27.2649				41	41	40	16.3	16.3	16.1	481.89	0	323.31	2801500000	397
27.0805	28.1195	27.3284	28.1579	27.832	26.6341	27.0722	26.4686	26.5187	26.854	26.334	27.1611	26.3912	25.8509	26.2839	26.3514	26.7933	27.4117	27.8166	26.1505	26.938	27.206	27.044	27.8816	27.1726	26.9045	25.4506	27.1898	27.794	26.1679	26.4806	27.5386	26.0413	26.9072	25.9086	26.8827				5	5	5	33.7	33.7	33.7	32.749	0	187.36	5770000000	167
23.5816	24.6432	24.8934	25.6903	24.7564	25.6344	25.9602	24.7647	25.4233	24.6814	25.1405	24.7912	24.8876	25.3222	25.574	25.1676	26.0051	25.5244	24.4837	25.7468	25.5106	24.3878	24.8487	25.109	25.6624	25.6259	25.5327	25.3393	23.9485	25.3317	25.1591	24.7949	25.3232	24.9137	25.4962	25.3605				11	11	11	28.7	28.7	28.7	63.836	0	274.37	1583500000	159
28.6535	28.9273	29.4474	28.4075	29.0086	29.1149	29.1148	29.3352	28.5608	29.0117	28.6845	28.9939	29.3227	28.5827	29.0752	28.3153	28.2963	29.1923	28.9918	29.598	28.5496	28.8274	29.1391	29.1186	29.177	29.4188	28.7531	29.1384	29.3035	28.8307	28.8739	29.0341	28.3942	28.9312	28.791	28.8899				21	21	21	49.5	49.5	49.5	75.429	0	323.31	21172000000	766
27.9663	28.8506	28.4097	28.0438	28.1392	27.5779	27.9173	27.9495	26.9294	27.7204	27.2722	27.5284	28.0163	27.227	27.4353	27.3439	26.6317	28.0183	28.3577	27.3849	27.7962	26.7876	28.2083	28.7422	27.8287	27.4812	26.7397	28.3076	27.5405	26.8527	27.1917	28.0614	27.1632	27.4244	27.2226	27.045				7	7	7	32.7	32.7	32.7	26.888	0	323.31	9632100000	283
27.9589	28.6014	28.5179	28.1994	28.4467	27.8473	27.7784	28.1965	27.7464	28.4221	27.9288	28.5304	28.2129	27.8386	28.656	28.1217	27.9284	28.2736	28.5518	28.2394	28.2632	28.512	28.5841	27.9949	28.5388	28.6721	28.5075	28.0673	28.3704	28.4049	28.5151	28.5158	28.2104	28.3318	27.6992	27.941				27	27	27	35.1	35.1	35.1	136.37	0	323.31	13724000000	818
26.2836	25.3057	25.6674	25.9208	25.7958	25.8147	26.1849	26.014	25.5139	25.8121	25.6322	25.9406	25.5235	24.5792	25.6159	24.6414	22.7413	26.0249	24.9211	25.2156	23.3481	26.3446	26.0798	26.3385	25.191	25.922	24.7331	25.3904	26.0897	24.3406	25.3588	25.7541	24.9185	26.3977	25.1273	25.4018				9	9	9	53.3	53.3	53.3	31.858	0	245.95	1867900000	127
22.945	23.0041	23.4618	23.5242	23.4157	23.3299	23.6775	23.3239	23.0719	22.9684	22.1351	23.1956	22.999	23.3586	23.503	23.6663	22.0576	23.2697	23.5926	22.7144	22.7524	23.4129	22.9965	23.4581	23.378	23.452	22.7581	23.1013	23.9098	23.4171	23.3457	23.1131	22.8958	23.1397	22.9592	22.8673				3	3	3	25.1	25.1	25.1	22.745	0	10.411	410860000	71
25.3886	26.7261	27.3913	26.49	27.1273	24.8377	25.2997	25.0647	22.8517	26.4428	25.4127	26.7218	25.1339	24.8576	26.6488	25.944	25.6898	26.2706	27.1311	26.2234	25.8857	26.9999	26.4379	26.3741	26.7822	27.4579	25.5215	26.3795	26.5022	26.1682	26.5553	26.9919	25.7738	26.7808	24.4087	25.5501				15	15	15	20.2	20.2	20.2	111.9	0	323.31	3361400000	318
27.0864	25.0486	24.5263	26.5933	25.9248	26.7619	26.8142	22.935	26.8769	24.6538	25.6386	24.6883	26.4614	25.6187	24.5015	27.5995	25.519	25.7001	24.9016	25.0804	25.6394	25.3568	25.8506	25.7698	24.5422	25.0087	24.8493	25.4159	25.7973	24.3925	24.8165	24.1926	25.1597	25.3025	26.4239	25.4564				8	8	8	22.9	22.9	22.9	54.705	0	107.11	2242000000	160
25.8433	25.2368	25.3788	25.4262	25.9577	23.8072	25.3648	25.9498	24.6593	25.2159	24.9556	26.1807	24.6038	24.5737	25.3297	24.4252	23.7602	25.6505	25.1673	22.0212	25.4486	25.561	25.6116	24.9224	25.52	24.9774	25.2217	24.4648	26.3355	24.9527	24.6482	26.322	24.5729	25.2786	24.5215	24.5534				6	6	6	47.9	47.9	47.9	19.961	0	33.823	1819700000	89
25.8393	26.9203	25.9925	25.3431	27.118	26.1595	26.0737	26.648	25.9554	26.2926	25.6704	26.875	25.5699	24.6338	25.72	26.6861	26.0039	26.8284	26.2413	26.4627	26.871	26.5024	26.495	26.7073	26.4	26.3163	25.5989	26.3791	26.0715	26.349	25.6794	26.9358	26.2445	26.1123	25.1013	25.5807				10	10	10	25.3	25.3	25.3	85.126	0	323.31	3691200000	268
24.3604	25.2746	25.0511	24.7683	26.0569	24.6269	23.9852	24.5411	24.9454	24.9337	24.7904	25.1958	24.4653	24.5442	24.7033	24.8758	25.5966	25.6824	25.3589	24.8175	24.674	25.142	24.9518	25.14	25.9241	25.9616	24.8018	24.9395	25.0808	24.8325	24.4853	25.4108	24.4391	25.1292	24.482	25.4298				9	9	9	12.3	12.3	12.3	119.7	0	244.92	1533600000	202
23.4515	24.8292	23.4316	23.4414	25.4441	24.1697	24.5085	25.1348	24.4269	24.7676	24.9396	25.1529	25.4399	24.9997	24.8925	24.135	23.8413	24.5493	24.6466	23.9985	25.1857	24.4144	24.8657	24.2891	25.2561	24.179	24.7518	24.5755	23.4468	25.0235	23.9995	24.8219	25.0374	25.4451	24.1073	23.9638				5	5	5	20.1	20.1	20.1	42.667	0	36.098	1158700000	87
26.1057	25.9116	26.654	26.396	26.6661	25.6475	26.2108	25.9176	24.8177	26.2805	25.622	26.6075	25.8211	24.6933	26.5931	26.3703	25.7345	24.4616	25.9453	26.8392	26.2166	25.8613	26.6521	26.2635	26.8435	27.0951	26.5165	26.5759	26.6707	26.5124	26.8107	26.9722	26.4538	26.519	25.5094	25.8227				20	20	20	37.1	37.1	37.1	103.14	0	294.5	3271000000	305
25.2956	24.2799	25.8006	25.3814	24.741	25.3206	25.4952	24.2559	24.2935	24.8242	24.6025	24.2505	24.5807	24.4191	25.2121	24.6486	25.0935	22.8324	25.176	25.7799	24.5278	25.1225	24.1231	24.8126	24.482	24.4162	24.778	24.7974	24.75	25.3228	25.4862	24.2008	24.7606	24.853	25.1288	25.5675				9	9	9	19.7	19.7	19.7	93.487	0	323.31	1635000000	176
26.7159	27.094	27.0701	27.1445	27.8664	26.4078	26.7313	26.1369	26.3411	26.9428	26.4322	26.93	26.9971	25.941	26.5473	26.7308	26.2629	27.3561	27.702	26.5521	26.9596	27.3023	26.9041	27.0862	27.2359	27.626	26.0623	26.9397	26.8597	26.5725	26.4046	27.3051	26.4729	26.9411	25.1741	26.8688				13	13	13	35.5	35.5	35.5	63.472	0	300.58	4861400000	267
24.2907	25.265	24.8479	24.6186	25.6796	23.4725	24.4113	24.1131	23.2181	23.8663	23.8332	24.1264	23.8388	23.4043	23.8039	24.0818	24.7472	24.8829	25.3202	23.1512	24.5778	23.6156	24.5443	25.3703	25.0008	25.6791	22.2267	24.6658	24.7301	23.8831	23.0617	25.0994	23.4855	24.5528	23.2181	23.6718				2	2	2	22.9	22.9	22.9	15.733	0	34.105	927340000	77
24.9591	25.9743	24.2125	24.2928	24.2714	24.2767	24.4116	24.2629	24.162	24.2508	24.235	23.5069	25.6524	24.2351	22.8035	25.4121	25.9184	23.4371	24.0646	24.1565	27.1483	24.1008	24.9498	25.2197	24.8626	25.0139	23.76	24.423	25.0782	24.3763	23.4868	24.0392	23.4744	24.4281	25.7747	24.8635				4	4	4	47.9	47.9	47.9	21.178	0	133.21	1150600000	65
24.5565	24.6808	24.2078	24.8239	24.2358	23.8978	24.4409	23.4947	24.0959	24.0281	23.5789	23.9276	24.2101	23.8034	23.7975	23.0304	23.5489	24.9684	24.0441	23.7728	23.9608	24.6657	23.9377	24.2431	23.9209	23.6448	23.169	23.9527	24.2838	23.5548	23.7986	24.0859	23.3357	24.0431	23.2243	22.9439				5	5	5	39.1	39.1	39.1	23.297	0	42.903	679110000	74
24.2846	24.1033	23.153	23.8934	24.2446	24.9021	25.5495	24.4202	25.9647	23.3092	24.9201	24.806	24.9261	25.813	23.6082	24.7506	24.9028	24.5595	23.2862	25.4917	24.6761	23.6616	23.514	23.6594	23.8945	23.3628	24.8287	23.1275	23.8386	22.7395	23.4671	22.5227	24.4573	24.1763	24.8368	24.715				11	11	11	18.8	18.8	18.8	71.635	0	113.73	924420000	153
24.9081	23.228	24.7476	27.0419	24.6045	26.7314	27.988	22.2991	26.7629	25.0248	26.8542	24.9961	26.4343	26.9136	25.8954	25.8208	26.6409	26.2422	20.525	25.6182	27.1136	25.7873	24.4489	25.0987	25.9923	23.881	27.0796	26.5274	22.8883	26.1232	25.632	24.2008	26.958	25.3371	25.275	24.8933				9	9	9	44.4	44.4	44.4	36.177	0	115.97	2849700000	180
26.0069	26.4519	26.1471	26.7366	27.156	26.0844	26.3464	26.495	25.7341	26.4962	26.1216	26.6285	26.664	23.9448	25.0292	25.6131	26.5353	26.633	27.0294	26.3323	26.2744	26.9584	26.4139	27.2353	26.6483	26.8797	25.9824	26.5803	26.1348	26.0804	26.3337	27.0317	25.9403	25.8714	26.3045	26.9025				4	4	4	11.6	11.6	11.6	42.426	0	272	3895400000	214
22.462	24.4959	24.1067	23.9956	24.2072	23.5564	23.7049	23.0392	23.0108	23.655	23.8898	23.7506	23.5356	23.3187	22.9947	23.3735	24.1618	24.3862	24.3275	23.8514	23.9143	23.5717	22.6445	23.95	24.0661	23.7724	23.1954	23.4744	23.4029	24.4632	24.0762	23.0613	23.3539	23.4476	22.4762	23.4129				5	5	5	15.9	15.9	15.9	56.974	0	256.8	563830000	87
24.5393	25.106	24.097	24.561	24.5305	24.3233	24.3017	24.3404	24.347	24.6849	24.3416	24.6394	24.6249	23.7146	24.3026	24.0186	24.0094	24.6113	24.8257	24.3704	24.3836	24.7108	24.4224	24.3707	24.5546	24.3742	23.8627	24.672	24.562	24.2307	24.3413	24.8825	23.275	24.2985	23.9126	22.7363				6	6	6	65.4	65.4	65.4	20.43	0	67.222	908690000	119
24.1697	24.1751	25.3455	24.6249	24.6963	23.5457	24.301	24.8163	23.9924	24.9056	24.1439	24.5794	24.6873	23.9342	25.0013	22.6161	23.5154	24.4626	25.3467	24.9963	23.7778	24.8403	25.0871	25.0144	24.1231	24.7767	24.6776	25.0095	24.7461	24.0418	24.6377	24.6877	24.4615	25.2817	23.8929	23.965				12	12	12	26	26	26	91.679	0	61.059	982420000	93
21.6637	23.1589	22.6112	22.5686	22.6173	22.266	22.2598	21.6644	23.2918	21.9554	23.1958	21.9508	21.613	22.3479	21.254	24.3076	23.4625	22.7308	22.7253	22.0017	22.9179	22.2819	21.6722	21.8823	22.3462	22.0174	21.7413	21.9351	21.4722	22.7569	22.4196	21.7839	23.4194	21.4345	22.1686	22.803				3	3	3	12.2	12.2	12.2	44.508	0	155.33	281050000	73
26.7811	27.724	27.2068	26.95	27.1153	25.2895	25.8765	25.9643	25.4192	26.6442	25.559	27.163	25.2316	25.3384	26.7912	26.0868	24.9286	26.4656	27.1891	25.2027	26.8474	27.373	26.892	27.5042	26.0602	27.6347	24.4324	26.1965	27.3747	25.0787	25.0683	26.9468	25.3694	27.2807	24.7482	26.1321				5	5	5	63.3	63.3	63.3	11.75	0	89.545	4029400000	102
24.1224	24.8596	23.4462	23.7805	23.8507	23.589	24.0393	23.5953	22.8582	24.2518	23.7935	24.1769	23.8421	23.6844	23.8371	24.7919	23.8829	22.7808	24.0033	23.5931	24.2739	24.4438	24.2514	23.4326	23.6715	23.3406	23.2147	24.0444	24.2481	23.5304	23.1446	24.5008	24.1611	24.204	24.4149	21.5823				8	8	8	34.3	34.3	34.3	50.072	0	71.129	661500000	137
25.4956	26.9074	26.5136	26.4438	27.1515	25.5256	25.7051	25.3718	24.6206	26.4845	25.5088	27.6177	25.9681	24.371	25.0769	25.2605	25.3456	25.8913	27.0732	24.6078	27.3883	27.0343	26.3937	26.5852	26.4269	27.0768	24.9132	26.5219	25.9292	26.2208	25.7224	26.9821	25.4629	26.8744	24.2743	24.7921				7	7	7	55.7	55.7	55.7	23.382	0	323.31	3772000000	230
26.0438	26.3986	25.3905	26.2707	26.1216	26.5327	26.2945	26.6943	26.679	25.6166	26.1321	25.5887	26.3507	26.6064	24.9563	25.9352	25.6751	26.7398	25.928	25.9288	25.9914	26.0354	25.598	26.1426	25.8307	25.8968	25.2762	25.5815	26.3003	25.362	25.338	25.9551	25.4504	25.612	25.8782	25.5804				8	8	8	27.8	27.8	27.8	53.349	0	167.89	2984800000	134
24.9684	25.7953	25.3105	25.2366	25.9506	25.0622	23.35	25.6833	23.9644	25.0765	25.0641	25.7573	24.7543	23.5465	25.5658	25.3254	24.376	24.8738	24.955	26.2721	25.1739	25.4644	25.5916	24.2933	26.0144	24.9202	22.9741	24.3453	25.8781	25.391	25.5997	25.2851	24.6355	25.8329	22.6321	24.9344				15	15	15	22.7	22.7	22.7	117.87	0	323.31	1568300000	152
23.5621	24.7461	24.0502	24.1428	24.6013	23.2787	23.5078	22.679	22.8286	23.8126	23.5467	23.6017	23.3987	22.9595	23.2977	23.8052	23.4448	23.8662	24.1809	24.0641	24.236	23.5078	24.2107	24.3007	24.0177	24.4341	23.5134	23.6295	23.1792	23.3945	22.3028	24.3868	24.0733	24.3314	23.3827	24.7051				13	13	13	20.6	20.6	20.6	118.71	0	110.25	617450000	185
29.6698	27.9558	25.4605	30.4535	29.0645	29.0949	31.969	21.3034	28.3911	27.6505	30.1766	28.3234	29.3619	29.1636	27.121	30.4788	29.6914	30.4541	27.9961	27.7348	30.9609	28.2478	28.0906	28.2337	29.6082	26.7376	28.6928	29.5679	25.829	29.1917	27.6232	27.3934	29.8036	29.7381	28.0938	27.7971				9	9	9	64.6	64.6	64.6	20.694	0	323.31	33835000000	568
25.1565	25.4395	25.7462	25.6144	25.5601	23.7846	25.5633	25.1299	24.185	25.8125	24.7248	25.504	24.8471	24.9209	25.5559	23.9299	24.112	25.4619	25.5972	25.1287	24.5379	25.4555	25.535	25.0984	25.5319	25.529	24.9911	25.4673	25.4748	25.2848	25.2466	25.5793	24.0885	25.1701	24.1581	24.6119				8	8	8	26.8	26.8	26.8	46.785	0	24.822	1542500000	141
26.0143	27.2524	26.8623	26.3177	27.0007	26.361	26.3532	26.6341	26.8216	26.7891	26.4956	27.0242	26.8565	26.5301	26.8459	26.214	26.9634	26.4349	27.0265	26.7338	26.6303	27.0209	26.5167	26.3129	27.0053	27.2703	27.0618	26.7728	26.0123	26.8401	26.7099	27.0271	26.6055	26.4684	26.4967	26.8969				17	17	17	32.7	32.7	32.7	96.022	0	323.31	4649600000	440
24.3208	25.3753	24.7731	25.3655	25.0719	25.2088	24.9645	24.7598	24.5542	24.7466	24.7713	24.9978	24.6769	24.7949	24.7785	24.3049	25.3609	25.8708	25.2828	24.7863	25.2462	25.1983	24.5086	24.7078	24.7862	24.3425	25.0428	24.7791	24.4024	24.5723	24.7559	24.7597	24.4419	25.0885	25.2009	24.117				12	12	12	28.3	28.3	28.3	72.379	0	168.52	1301500000	218
22.7904	24.6218	23.2964	23.4832	25.1927	23.2097	22.8619	21.9116	22.3904	23.1246	23.5768	23.2784	23.4005	22.6842	23.2799	24.082	25.0667	23.0086	23.1992	23.2255	23.2476	24.0268	23.287	25.124	23.5378	23.5989	22.6966	23.1772	23.1236	23.101	22.7531	23.273	22.1203	23.0788	22.3086	23.6604				3	3	3	6.9	6.9	6.9	71.649	0	62.03	653510000	114
25.1374	25.2577	25.9309	25.9892	24.4226	26.0514	25.5284	24.8095	22.5489	25.8469	23.9384	25.5596	23.8539	24.966	26.1534	24.9017	25.502	25.1526	25.0847	25.6819	24.9862	25.4202	25.6794	25.364	25.3688	24.8947	25.3442	25.8844	25.4181	25.8493	25.9811	25.3235	25.1406	25.5471	25.0669	24.3067				6	6	6	17.2	17.2	17.2	58.743	0	58.715	1738500000	139
25.7406	27.2259	27.5007	26.2838	26.8419	24.7512	25.3351	26.4373	24.4306	27.0938	25.7489	26.9918	25.7599	23.2259	27.4522	25.9718	25.3242	26.5942	27.3836	26.7985	26.297	27.1978	26.2536	27.1863	27.029	27.6084	25.5099	27.065	27.0191	26.3796	26.4624	27.7285	25.9746	26.8469	24.4608	25.5125				12	12	12	44.7	44.7	44.7	41.97	0	323.31	4231900000	319
24.9578	25.3311	24.5066	25.0734	24.4743	24.0098	23.8187	24.3253	23.2723	24.4182	23.2102	24.142	23.8021	24.0453	23.5318	23.3294	24.3899	24.7885	24.4888	24.2046	24.2039	24.8732	24.2888	24.5437	23.9731	24.1544	23.2918	24.7421	24.9523	24.2086	23.3931	24.4033	23.2788	24.1749	23.0849	22.1606				6	6	6	47.6	47.6	47.6	24.418	0	178.94	808810000	158
25.3744	24.7705	24.1083	24.9595	25.2792	24.7256	24.645	24.3956	24.9947	24.6233	24.7914	25.1707	24.4831	24.6753	23.2171	25.223	24.8906	25.0125	24.5156	23.6041	25.1813	24.8971	24.7886	24.7435	24.7898	24.8866	24.3557	24.4102	25.1078	23.8124	23.5362	24.7013	24.1902	24.5329	24.5108	25.3205				10	10	10	29.9	29.9	29.9	62.717	0	97.354	1113200000	203
25.6978	26.4399	27.1905	26.5516	26.4219	26.3886	26.0937	26.4087	26.051	26.4542	26.6944	26.7166	26.3215	25.9665	26.6722	27.5159	27.1933	25.7252	26.3987	26.9249	26.1013	26.498	26.2581	26.3653	27.0807	26.9705	26.8465	26.6143	26.3139	26.5212	26.667	26.673	26.4363	26.3043	26.3295	26.2881				15	15	15	31.1	31.1	31.1	82.431	0	323.31	4365600000	362
21.8909	22.7392	22.9722	22.7726	22.8471	22.978	22.9131	22.3174	22.7739	22.5354	23.3109	22.0437	22.9858	23.1978	22.5241	23.7343	24.7576	22.5772	22.3557	23.1304	23.4519	22.2947	21.7003	21.9435	22.9227	21.9944	23.2497	22.635	21.9538	22.9452	22.9027	21.4257	23.8557	22.2483	22.2997	21.7737				3	3	3	20.3	20.3	20.3	24.68	0	145.31	342270000	70
27.9587	27.5051	27.2947	27.7189	27.9037	27.2028	27.6152	27.6692	27.0158	27.3463	27.0976	27.3095	27.3128	27.0701	27.0359	26.4892	26.2719	27.7951	28.0272	26.8879	27.5333	27.9955	27.6601	28.0467	27.5258	28.1539	26.4452	27.3744	27.7396	27.1219	27.0895	27.4155	27.1649	27.9226	26.6822	27.2194				5	5	5	35.8	35.8	35.8	29.816	0	323.31	6897500000	134
24.8315	23.0536	23.677	24.0906	24.2138	24.5191	24.9593	23.8558	24.4598	23.6375	23.8986	24.1964	23.4307	24.8391	23.8038	23.5256	23.0976	24.2288	23.4909	23.7905	23.8306	23.8127	24.0892	23.5991	23.8457	23.3992	23.6464	22.923	24.5049	23.2476	23.6974	23.4461	23.6849	23.6505	24.3041	24.6909				6	6	6	13.2	13.2	13.2	76.743	0	47.876	633840000	78
23.6483	25.8004	25.3942	24.5207	25.1811	24.1174	23.8718	24.4871	23.0725	24.9357	23.5497	25.1281	24.351	22.0105	24.3844	23.9627	24.1113	24.5035	25.5437	24.7773	24.4558	24.9244	25.0341	24.7666	25.3714	25.8166	24.2324	25.0383	24.6963	24.7002	24.7661	25.214	24.3666	24.6503	23.9241	24.9777				8	8	7	16.2	16.2	15.3	83.829	0	85.38	1179300000	146
25.2288	25.2632	24.8754	24.9581	24.5349	25.5837	25.267	24.6327	24.834	24.0394	24.5754	24.7002	24.2576	24.5302	23.9246	23.5516	24.309	24.898	24.772	24.6808	24.6511	23.8919	24.4591	24.4871	24.6916	23.0083	24.3584	24.1996	25.4756	24.1052	24.5754	24.9176	24.7521	24.6419	25.4166	24.8317				7	7	7	39.1	39.1	39.1	42.835	0	180.82	1184300000	125
26.5041	26.2881	25.2074	27.1614	26.8174	26.4264	26.5161	26.6371	25.7855	26.2969	26.2233	26.629	26.8541	26.2293	25.9875	26.3388	25.4876	26.5343	26.081	26.3038	25.789	26.4158	26.5776	25.8832	25.9062	25.9891	26.492	25.376	26.4346	25.9731	26.8341	26.6845	26.242	26.5272	26.4466	27.9717				19	18	2	35.4	33.7	3.9	92.115	0	323.31	3432400000	293
24.9982	25.8905	26.5115	25.6695	25.3874	25.409	25.1466	25.9591	24.4244	26.1712	24.921	26.1036	25.4432	24.98	26.6409	25.0135	24.6037	26.0635	26.0786	26.2139	25.5232	25.9159	26.1707	25.419	25.9203	26.2632	25.5692	26.1026	25.9284	25.8445	25.8055	26.2083	25.267	26.3039	24.9892	25.1789				27	27	27	20.3	20.3	20.3	211.95	0	323.31	2290600000	293
24.7075	25.6333	26.4623	25.3177	26.0694	26.1502	25.5445	25.4701	25.402	25.9234	25.3847	26.2232	25.0765	25.5765	26.693	26.1288	26.261	25.1967	25.5641	26.3444	26.5425	26.3978	25.6899	25.6067	26.2613	26.3039	26.6919	25.9779	24.806	26.3824	26.1726	26.0095	26.0362	26.2991	25.4681	25.7961				45	45	45	25.6	25.6	25.6	292.75	0	323.31	2689000000	510
27.0202	28.2157	27.3832	26.8844	27.0036	25.9223	25.8475	26.6139	25.9094	27.2156	26.2472	26.8347	27.7679	24.7744	27.0738	26.9885	28.3292	26.8547	27.4798	27.0703	24.6267	27.1547	26.6962	27.2377	27.7296	28.3315	26.3867	26.8779	27.3621	27.3619	27.2991	27.96	26.1891	26.7948	26.2191	26.7546				12	12	12	18.4	18.4	18.4	124.61	0	323.31	6396300000	199
26.9601	25.851	26.0474	26.4022	26.2851	25.4822	25.9782	26.4808	25.7035	26.9337	26.3208	26.5249	26.1164	25.7603	26.3939	24.919	25.3358	26.3566	25.9918	25.8276	25.5661	25.9787	26.4069	26.3998	25.9952	25.779	26.2446	26.7079	26.916	25.6961	25.9004	26.5802	26.094	26.2502	25.6312	26.457				5	3	3	42.1	27.2	27.2	22.276	0	48.542	3798200000	173
26.0636	26.8554	27.7053	27.126	26.8782	26.5199	26.7412	26.731	25.7959	27.174	26.5626	27.2043	26.3122	26.2325	27.9782	26.3076	26.1195	26.3564	27.1565	27.5731	26.6893	26.8181	26.8165	27.0332	26.8703	26.4983	27.6397	27.4804	26.8811	27.2107	27.4309	27.1012	26.5733	27.0102	26.5095	26.1935				16	11	11	28.1	20.2	20.2	80.272	0	323.31	5277100000	267
25.7681	26.4034	26.2057	26.2054	25.2405	25.9291	26.5761	26.4566	25.9921	25.8889	26.1006	25.9707	25.5847	26.0879	26.4595	23.8394	25.7423	26.3373	26.1466	26.1864	25.8212	25.5907	25.7436	26.3198	25.6877	24.9412	26.1569	26.3453	26.1339	25.6705	25.9289	25.6005	25.7626	25.7193	26.1988	25.9799				6	6	6	49.1	49.1	49.1	23.787	0	155.4	2633900000	156
26.8711	27.4313	27.5916	27.5914	27.9591	26.4672	26.6782	27.0487	26.0984	27.5726	26.4802	27.7206	27.0187	26.2787	27.591	26.5879	26.9242	27.498	27.817	27.5192	27.0918	27.6877	27.4943	27.6634	27.9735	28.3851	26.907	27.4037	27.808	27.4647	27.0818	28.0788	26.8539	27.5858	26.5352	27.2451				24	24	24	33.9	33.9	33.9	102.43	0	323.31	7261400000	505
23.1557	24.4207	23.8587	23.5133	25.2016	23.9478	23.6975	24.1004	22.4269	23.61	23.5355	24.2186	24.0146	23.2733	23.6213	23.0043	23.6217	23.2795	23.8415	23.6468	24.842	24.2635	23.4046	24.8554	23.5008	22.8348	23.4997	22.8471	23.007	23.7155	23.1936	24.2758	24.3611	24.2794	23.3038	22.4853				5	5	5	18.4	18.4	18.4	38.725	0	12.326	629720000	129
27.4357	27.9399	27.6232	28.1665	27.8123	27.5651	27.7629	27.3881	27.3098	27.8257	27.4325	27.7011	27.2403	27.6682	27.8198	27.1671	27.753	27.3592	27.6202	27.5768	28.0054	27.4348	27.6944	27.6048	27.8304	27.1242	27.6216	27.6362	27.8417	27.8984	27.8879	27.8048	27.7603	28.0363	27.248	27.095				12	12	12	28.8	28.8	28.8	73.114	0	323.31	8053800000	279
24.6229	24.9394	26.0385	25.8039	25.3587	25.3389	25.9843	25.4468	25.2232	25.6235	25.611	25.5852	25.3738	24.5156	25.6946	25.2289	25.6768	25.445	25.5509	26.2214	25.4957	25.257	25.5531	25.0047	25.4856	25.0523	25.8756	25.6641	25.8181	25.5888	25.9673	25.3629	25.4078	24.7385	25.7292	25.9873				20	20	15	35.9	35.9	30.5	102.35	0	323.31	1974100000	246
23.9216	25.3555	25.3497	24.8101	25.0505	24.486	24.9001	24.7769	23.5674	24.7689	24.4828	25.152	24.669	24.8195	24.409	25.1423	24.6079	24.9496	25.1733	24.8686	24.9238	24.7721	24.9392	25.1166	25.159	25.2335	25.1826	24.2099	24.8494	24.4569	24.9156	24.3993	24.6601	24.8788	24.6671	25.6532				19	19	19	30.4	30.4	30.4	108.24	0	144.84	1257300000	187
26.1535	26.1579	24.962	24.9194	23.5138	25.4694	24.8676	25.0451	25.0328	25.1418	25.3329	24.2491	25.4847	25.3894	25.1795	26.7853	26.9072	24.3741	25.1858	25.2043	26.3173	25.6643	24.4998	25.7429	24.2687	24.5134	25.0926	25.131	25.3125	25.192	24.4674	25.0328	25.5102	25.2856	25.4555	24.4537				7	7	7	74.6	74.6	74.6	22.337	0	323.31	2090900000	136
26.4916	27.0151	27.7415	27.8612	27.3008	26.3877	27.3349	26.4725	26.3643	27.3986	26.8837	27.5385	26.7664	27.0156	27.6697	26.2718	26.3293	26.6812	27.3818	27.5405	27.0479	26.9315	27.4137	27.5071	27.6014	27.0883	27.0382	27.5968	26.6296	27.1261	27.5027	27.9649	25.9661	27.6458	26.8618	26.879				10	10	9	21.1	21.1	19.7	67.56	0	161.08	5962300000	338
24.7267	25.8701	23.667	24.6415	24.6932	24.404	24.8871	24.1144	24.536	24.151	24.5265	23.8716	24.1963	23.685	23.3116	24.9674	24.275	24.6515	24.2013	22.5741	24.3772	24.3223	24.6837	24.922	23.8037	23.8388	23.6918	23.995	24.7013	23.4641	23.4848	23.8589	23.5194	24.2972	23.8633	24.681				3	3	3	21.4	21.4	21.4	23.924	0	73.501	864350000	99
26.2254	26.5355	26.0543	26.0011	26.3969	24.0378	25.5002	26.1973	24.6952	26.5294	25.5682	26.796	24.8503	24.8866	26.2771	25.2206	24.5923	26.5774	26.9134	26.3642	25.3318	26.3743	26.2653	25.8824	26.6626	27.0885	25.6912	26.1963	26.6976	25.8074	26.3263	26.5553	25.8511	26.6183	24.7894	25.528				13	13	13	25.6	25.6	25.6	68.549	0	323.31	2888800000	217
27.5505	26.5474	26.2152	27.1027	27.4651	27.2532	26.9634	27.7104	26.7872	26.9532	26.6882	27.4328	28.0047	26.8637	25.8255	25.9761	26.1981	27.5523	26.7561	26.3805	26.874	27.2449	26.8957	27.3321	26.376	26.9829	25.321	25.3176	27.8045	26.2038	25.9132	27.2343	26.3611	26.9482	27.496	26.8141				6	6	6	23.3	23.3	23.3	26.697	0	323.31	5286400000	307
25.9576	26.497	25.7048	25.9341	26.151	25.9362	25.6635	25.7921	24.0886	25.7308	25.4389	25.8408	24.6187	24.0363	25.5162	24.7687	24.7005	25.742	26.3623	24.9161	25.2674	25.7512	26.3071	26.6188	25.8603	26.1029	24.7497	25.85	26.4657	25.1158	24.8697	25.8735	25.34	25.7854	26.0597	24.2648				8	8	8	40.9	40.9	40.9	38.608	0	110.68	2439800000	216
24.5334	25.3108	23.8017	24.7279	25.1375	24.41	24.2813	24.6167	21.4115	24.4386	24.2216	25.1925	25.5633	23.765	25.0397	23.8376	23.9952	24.2656	23.7746	24.1857	24.9428	24.8184	24.6525	24.623	23.5898	23.9526	24.2123	24.5294	24.5142	24.209	24.5148	25.4035	24.3365	24.856	24.4639	24.0729				6	6	6	33.6	33.6	33.6	32.236	0	148.98	1036700000	126
24.0691	25.8035	24.5881	24.7048	24.3288	23.9856	24.2127	24.0936	23.7554	24.4237	24.4225	24.0634	24.3644	23.7747	23.3737	24.8744	24.7962	24.582	24.5961	23.9063	23.8691	24.7894	24.5403	24.7945	24.1711	24.6666	24.2105	24.3588	24.4561	23.4706	23.6588	23.1986	23.9192	24.0229	24.3596	24.626				3	3	3	15.7	15.7	15.7	25.835	0	140.91	879490000	125
21.1783	24.168	21.8027	21.062	22.3561	22.1232	21.1457	22.1578	21.1252	21.382	21.0965	21.542	20.9139	21.2166	21.3497	24.5162	22.9007	21.7472	21.2199	22.3826	21.494	21.3485	21.0402	21.5069	22.5648	22.7109	21.5545	21.9314	21.8677	21.5187	21.1948	21.2812	21.9456	21.1757	21.3082	21.9332				2	2	2	5.4	5.4	5.4	59.559	0	175.53	209100000	40
28.9272	28.3988	27.4514	28.7255	28.4093	29.2179	29.7283	29.1661	28.8894	27.7664	28.3838	27.4724	30.0096	28.9875	27.3986	28.0858	27.7759	29.5964	28.3001	27.8678	28.3095	27.8694	28.341	28.4167	28.2601	28.3725	27.3348	28.1691	29.566	27.248	27.7075	28.2232	27.7614	27.99	28.4103	28.2915				13	13	13	48	48	48	35.7	0	225.25	16949000000	448
26.2996	27.2814	25.3006	25.9783	26.5739	26.5157	26.792	26.2241	25.8014	24.9673	25.792	25.1335	26.2939	25.1518	23.0467	26.9096	26.1276	26.8684	25.6798	25.1246	25.9082	25.6538	25.6783	26.3499	25.7733	25.8374	23.641	25.4304	26.2879	24.2888	24.7234	24.9497	24.6665	25.0378	26.0995	26.1948				13	13	12	65.1	65.1	65.1	21.273	0	323.31	2993100000	320
24.3045	25.6469	25.6072	25.6423	25.1658	24.3121	24.822	24.7576	23.8903	24.6737	24.4344	24.9756	24.618	23.7088	25.2318	24.2855	24.2371	24.5461	25.4668	25.3519	24.8139	25	25.2835	25.353	25.1095	24.2005	24.0762	25.3456	24.4633	24.2921	24.6805	25.1826	24.3312	21.7326	24.0939	24.3243				4	4	4	19.6	19.6	19.6	40.529	0	285.21	1255200000	97
26.1869	26.0234	26.8381	26.0335	25.3482	25.46	25.4568	25.9731	25.0152	25.9274	24.993	25.8363	26.0518	23.5811	25.8194	25.3327	24.7865	26.3571	27.1618	26.1721	25.4607	26.5763	26.1435	26.2711	26.3757	27.7908	25.0389	25.9628	26.3036	25.7288	25.4601	26.861	25.2856	26.2535	24.9386	25.9564				16	16	16	30	30	30	112.15	0	304.13	2644600000	250
27.021	27.2698	27.996	27.6183	27.2954	26.8763	27.2678	27.3735	27.112	27.1563	27.0036	27.4887	27.3506	27.0548	27.6089	27.1705	26.3435	27.6954	27.3013	27.217	27.0227	27.381	27.57	27.4672	27.2986	27.4521	27.2523	27.4612	27.4768	26.941	27.1637	27.2737	26.8813	27.4165	27.0574	27.0638				11	11	11	58.3	58.3	58.3	31.284	0	314.38	6713700000	199
25.87	23.0297	25.9836	26.294	23.7804	25.7976	26.1399	25.9228	25.6202	26.0319	25.3791	25.9254	25.6532	25.5562	26.5749	26.2196	25.5644	25.9337	25.7655	25.5424	25.8869	25.2225	26.3845	26.1289	26.0925	25.8444	25.2979	26.5204	26.4962	25.9847	25.9034	26.047	24.985	26.2538	25.5207	26.0236				10	10	10	23.9	23.9	23.9	68.283	0	323.31	2439900000	148
22.3748	21.7616	22.3402	22.2049	22.6699	22.768	23.2491	22.1557	22.2439	22.3817	22.1414	22.436	21.9812	22.5707	22.2079	22.3679	22.0349	22.9722	21.8003	22.2094	22.2362	22.4054	22.3143	22.306	21.6665	21.5435	22.4115	22.1712	22.2245	22.7004	22.8565	22.0771	22.5906	22.4528	22.4568	22.6529				3	3	3	13.7	13.7	13.7	34.596	0	8.6775	214390000	41
23.3814	22.0098	25.7275	24.0777	24.2403	24.2906	23.9405	23.8121	24.577	24.1078	24.0898	23.96	24.5454	24.2944	23.7756	20.1326	24.1464	20.1006	24.5473	23.712	24.283	24.1304	23.7063	23.7176	23.9345	23.4556	24.8742	23.9387	23.4864	24.0743	24.3049	23.3645	24.486	24.1684	23.743	23.1409				7	7	7	20.8	20.8	20.8	63.944	0	173.93	678420000	133
25.6723	25.3548	24.1941	25.0444	25.0842	26.5171	25.528	25.6943	26.2943	24.7424	25.8112	25.2523	25.8419	26.0732	24.8488	24.9204	24.3363	25.2666	24.5695	25.4046	24.9472	24.4843	25.291	24.9805	24.9453	24.4862	24.7355	25.2877	25.5363	25.2844	24.9949	24.6152	25.2918	25.1055	26.4689	26.3741				9	9	9	28.8	28.8	28.8	54.392	0	153.36	1687100000	146
25.6484	24.9391	25.2683	25.7879	26.7142	24.7445	23.6989	24.0736	23.9389	23.679	23.5847	24.81	24.8539	24.0989	23.3888	24.1994	24.4007	24.5647	25.1493	23.4908	25.6242	24.6256	25.0057	25.1359	24.8266	25.3722	23.5624	23.9056	25.1058	24.1715	23.4052	25.1177	24.3201	25.2352	24.5394	24.1536				3	3	3	40.5	40.5	40.5	13.196	0	323.31	1722800000	97
22.9762	25.0005	23.7828	23.6482	23.8094	23.8316	23.4366	23.531	23.6847	23.243	23.0595	24.3042	23.842	22.9282	23.1383	25.1779	24.8023	23.6843	23.0063	24.108	25.4498	24.1097	23.0192	23.8654	22.9937	23.1989	23.581	23.9813	23.2029	23.6323	22.9989	23.2631	23.7908	23.4933	23.3995	22.8247				5	5	5	31.8	31.8	31.8	35.61	0	323.31	709530000	121
23.6669	23.9977	25.4193	24.1021	24.2001	24.4338	25.0398	24.8885	24.4756	24.6734	25.1075	24.1189	25.5588	25.1435	25.7973	24.6317	24.9729	24.7405	24.2279	25.4284	24.2335	25.0793	23.9983	24.7395	23.9893	23.9901	24.7681	25.4941	23.4725	25.4773	25.158	24.2361	23.9167	24.2559	24.6512	23.351				9	9	9	27.8	27.8	27.8	46.51	0	323.31	1124000000	131
25.0212	25.7634	24.6465	21.9097	23.7063	25.5728	25.9323	25.1792	25.4156	24.7424	25.1389	24.6565	25.3397	24.0623	24.7663	25.8046	25.8392	25.8253	24.0611	24.17	25.3105	24.4145	24.7232	24.9682	24.8308	24.2455	24.5695	25.0768	25.3185	24.4715	24.7755	24.4526	25.0236	24.5513	24.7625	24.5863				8	8	8	35.5	35.5	35.5	46.291	0	222.26	1467200000	128
27.9489	28.5056	28.3133	28.2004	28.1803	27.3074	27.649	27.4021	27.601	27.9339	27.294	27.896	27.6441	27.414	27.6029	27.3928	27.2954	27.2932	28.8376	27.3204	27.9333	27.8965	28.0412	28.7	28.1646	28.3782	26.6305	27.8037	28.2508	27.6346	27.628	28.678	27.166	27.9633	26.3343	27.1043				5	5	5	34.8	34.8	34.8	22.345	0	323.31	10570000000	328
24.3608	25.4033	25.9725	25.2186	26.184	24.3943	23.6816	24.3281	24.8508	24.7596	24.3074	23.9343	25.1249	24.3129	24.6307	24.1872	24.5329	24.9184	26.0739	24.5273	25.7997	23.88	24.3293	26.0633	25.6946	26.176	23.8731	25.3722	25.079	24.7234	24.1247	25.34	24.553	24.8003	23.259	23.9246				8	8	8	41.2	41.2	41.2	37.458	0	144.27	1251700000	132
28.5161	28.958	28.6402	28.4145	28.6862	29.1289	29.2413	29.1029	28.2315	28.4196	28.0012	28.1442	29.4915	28.296	27.9577	27.4326	28.1533	29.1225	28.9576	28.6585	28.0106	28.2863	28.4311	28.4236	28.2535	28.5148	27.8285	28.1875	28.8133	27.8644	27.8494	28.6447	27.7329	28.0596	28.6446	28.2596				19	19	19	63.8	63.8	63.8	52.878	0	323.31	16336000000	702
25.1477	24.1231	24.8039	25.2187	25.0007	24.4491	25.2106	24.4134	25.3052	24.6588	24.6674	24.8188	24.7937	25.3035	24.329	25.8998	25.3663	24.6828	25.0238	24.5114	25.1587	25.4817	24.8776	25.1072	24.7924	24.2911	24.527	25.0205	24.8469	24.2208	24.0556	22.928	24.9701	24.8282	24.779	25.309				5	5	5	20.4	20.4	20.4	46.701	0	323.31	1234100000	150
24.1636	24.8179	25.1679	24.737	25.3058	24.6372	24.0674	24.2467	24.4746	24.3848	24.4456	24.8759	25.1603	24.8448	24.3284	24.6543	24.4656	24.9064	25.3766	24.3001	25.268	24.6551	23.0802	24.833	25.0889	25.1216	23.6761	24.0009	24.2215	24.5791	24.2862	25.0799	23.9284	24.7776	23.5328	24.6598				16	16	16	18.1	18.1	18.1	160.99	0	201.42	1041000000	144
25.397	25.3208	25.5578	25.5514	26.3578	25.2803	24.9117	25.0597	25.5214	25.5797	25.0833	25.7284	25.2591	25.2506	25.3553	25.2282	25.701	25.8332	25.2107	25.3377	26.0022	25.9527	25.6616	25.2253	26.0898	26.18	25.5833	25.1799	25.4035	25.1436	25.4423	25.5499	25.186	25.8876	25.5418	26.0188				8	8	8	15.2	15.2	15.2	115.96	0	300.36	2021000000	154
25.0965	25.1199	24.4452	24.604	23.6563	27.3949	24.9712	28.7734	22.2913	24.2957	20.3933	26.6579	27.3806	20.1427	24.3547	22.2851	21.9843	27.229	24.7759	27.0561	24.3224	24.3201	26.5361	26.3168	24.9218	24.1668	22.2687	24.7829	27.4483	25.0461	23.7908	26.095	23.8954	25.1137	25.1834	23.1633				13	13	13	41	41	41	66.616	0	323.31	2521900000	158
26.582	26.3573	26.8927	26.464	27.0131	26.8102	26.9473	27.2692	27.1241	26.9801	26.93	27.0603	27.1769	27.2037	27.132	26.8387	26.4408	27.0075	26.7791	27.1898	26.9189	26.9384	26.7748	26.4916	27.1217	27.2359	27.1599	26.8701	26.8965	26.8457	27.153	26.9499	26.6724	27.1137	26.8928	27.2506				19	19	19	36.7	36.7	36.7	91.706	0	323.31	5063700000	486
27.8574	26.0259	25.7654	27.0613	26.5282	28.5639	28.1626	25.9829	27.9625	26.6009	26.8089	27.0861	25.8474	26.8681	25.219	26.3909	25.2762	26.6492	23.1305	26.4478	25.1432	26.1007	26.6724	26.8018	25.2556	24.5638	27.1237	25.1384	26.4362	25.6407	26.0881	25.8895	25.3374	26.0802	28.9067	27.5486				12	12	12	28.9	28.9	28.9	62.88	0	323.31	4179200000	188
24.7863	23.6	24.8363	23.9439	24.2902	23.8479	24.0378	24.1478	22.431	24.156	24.0198	24.9969	24.3067	23.9222	24.6934	22.0544	23.2646	24.4443	24.5297	24.7223	24.3477	24.3775	23.9844	24.6093	24.6325	24.4089	24.2612	23.9616	24.248	23.9261	23.9077	24.9277	24.1308	24.5834	23.4094	22.11				5	5	5	39.3	39.3	39.3	27.325	0	323.31	874230000	122
24.4318	23.8094	23.7471	24.5476	25.0718	24.9338	24.2224	24.6083	25.108	24.9366	25.2675	25.944	24.8917	24.8664	24.4479	23.6435	24.7728	23.6996	24.7394	23.0991	25.746	24.8308	24.4733	24.8281	25.7449	24.2412	25.2812	24.3894	23.6528	24.904	24.8491	25.4541	25.0988	25.4486	24.2055	24.9197				3	3	3	20.6	20.6	20.6	29.965	0	323.31	1252200000	81
26.5635	26.9111	26.5694	25.9754	26.1818	24.9965	25.0478	26.616	26.0915	27.0695	25.5646	26.8223	26.5052	25.41	26.8899	26.5486	26.6836	26.4592	26.1833	26.4333	27.8113	26.3144	26.224	26.5925	26.4991	27.0073	27.12	26.6714	26.6591	26.1471	26.5785	26.72	26.4559	26.2599	25.9373	25.941				6	6	6	34.3	34.3	34.3	33.697	0	323.31	4397100000	228
26.3271	25.9783	25.7585	26.084	26.5246	25.7475	25.8413	26.0738	25.5689	26.09	25.6545	26.6276	25.5218	25.6071	25.5329	25.8659	25.4192	26.3217	26.3379	25.9419	26.1553	25.5565	26.6089	25.8447	26.421	26.8598	26.0613	25.6567	26.3495	25.834	25.8463	26.6158	26.0672	26.3176	26.174	26.7384				16	16	16	29.4	29.4	29.4	102.26	0	323.31	3043500000	332
26.017	25.9999	25.1837	26.3064	26.0155	25.2703	25.8884	25.8465	24.6621	25.7868	25.1307	25.7642	25.5518	25.3191	25.1918	24.6965	24.8913	25.6116	25.8225	24.5902	25.3467	26.0045	25.9296	25.9566	25.7085	25.3453	25.107	25.3843	25.674	24.9856	25.0674	26.1938	25.3141	25.7678	25.444	25.5644				4	4	4	42.9	42.9	42.9	17.328	0	323.31	2096200000	170
30.2214	29.4253	28.0386	28.787	28.9336	28.9027	28.6426	29.484	29.0036	29.0596	28.9363	28.8149	28.8385	28.68	28.4701	28.2541	28.4736	28.7092	28.875	28.3441	28.6255	29.0157	28.8705	29.4234	28.7833	29.975	28.0756	28.9889	28.6218	28.4077	28.4127	29.2455	28.6037	29.0061	29.3446	29.1184				8	8	8	54.5	54.5	54.5	19.891	0	323.31	27788000000	441
27.5677	26.076	26.103	26.4596	27.1838	27.3587	26.6992	27.4435	28.0958	26.7165	27.6973	26.8535	27.0007	27.6455	26.4881	27.1698	27.4946	26.8782	25.9739	27.2458	27.4741	26.8641	26.5643	26.4267	26.9862	27.4147	26.4317	26.3115	27.4214	26.9768	26.5064	26.7338	27.3979	26.5923	27.3651	28.1132				10	10	10	43.8	43.8	43.8	41.92	0	323.31	6008000000	421
26.1649	24.5615	23.5492	26.5689	25.3387	26.1568	26.6085	26.4136	26.4435	25.3097	26.3109	25.0473	27.0596	26.1697	24.3227	25.3292	26.4282	26.3791	23.9918	25.7904	25.6636	24.4268	25.0951	25.7736	25.2939	23.9594	25.694	25.1047	25.82	24.735	23.901	24.693	25.2591	24.6908	25.4196	24.8904				3	3	3	13.6	13.6	13.6	49.411	0	228.85	2186500000	110
25.1183	25.7526	27.4724	25.8375	26.3922	26.9641	26.3847	26.0979	25.8139	26.3464	26.6409	26.5767	26.7411	27.1746	27.3469	26.0692	26.1315	25.6456	25.8096	27.3841	26.669	26.6483	25.7928	26.2333	25.8156	25.2802	27.1082	27.218	25.1551	26.3248	27.0524	25.5762	26.6291	26.3065	26.2235	25.4799				11	11	11	43.5	43.5	43.5	33.296	0	323.31	3737900000	195
26.1393	25.8819	25.4979	25.8016	26.1101	25.4979	25.2241	25.5906	25.986	25.1525	25.7372	25.4099	25.8312	25.412	25.7707	25.5666	25.7632	25.0429	26.2169	24.6939	25.8034	25.9345	25.3881	26.0234	26.166	25.7951	24.578	25.5426	25.6889	25.1981	24.6592	26.0862	25.3649	25.779	25.2929	26.2382				5	5	5	63.8	63.8	63.8	17.909	0	141.39	2139100000	161
25.9138	25.4236	24.8478	25.9136	26.0049	25.5589	25.3016	25.2728	25.7007	24.8649	25.7016	24.9929	24.8299	25.5481	23.5008	24.4947	24.4044	25.979	25.4348	24.1271	25.6264	25.605	25.6009	25.3566	25.0417	24.9632	24.5964	25.114	25.5588	24.3316	24.4515	25.3926	25.2069	24.6671	25.2346	25.7206				5	5	5	37.9	37.9	37.9	22.456	0	80.383	1627700000	180
27.5447	27.4541	27.6276	27.3499	27.964	27.4073	27.7223	27.239	26.9286	27.215	27.451	27.1923	27.341	27.4207	27.6631	27.7236	28.4297	27.6288	27.5062	27.3151	27.6901	27.7901	27.2866	27.888	27.267	27.2006	27.2669	27.6228	27.2235	27.55	27.2996	27.3779	27.1135	27.2745	27.395	27.184				11	11	11	67.8	67.8	67.8	26.923	0	323.31	8771100000	543
25.8354	24.7795	26.5925	25.9117	25.5138	25.6997	25.549	25.9626	24.6823	26.0058	25.1717	25.8521	25.2853	24.428	25.7976	24.3872	25.175	24.6374	25.3762	25.9492	25.6516	25.6052	26.3079	25.9141	25.1966	24.774	26.2013	25.5974	25.2694	25.5762	25.427	25.8779	25.3132	25.3254	25.8604	25.0403				5	5	5	21.4	21.4	21.4	30.588	0	78.089	2061900000	185
27.1195	26.1359	25.9002	25.9233	26.5518	25.263	26.0341	26.7148	25.3973	26.9844	26.2842	27.5009	26.1138	25.6559	26.2563	26.3179	26.2608	25.7304	26.449	26.354	25.7797	27.0002	27.0971	26.4829	26.4966	26.9229	26.2064	26.7056	27.0148	26.427	26.4822	26.9803	26.3465	27.0041	26.6893	26.0195				9	9	9	46.1	46.1	46.1	42.823	0	323.31	4820400000	382
24.4853	22.134	26.3328	23.6061	23.871	25.7635	25.3122	25.995	24.689	25.9375	25.5754	26.4274	25.8373	25.6557	27.1459	26.4168	25.133	24.9209	24.522	27.2421	25.4234	25.8049	24.7448	24.2526	24.3626	23.2551	26.1262	26.6505	24.736	27.0903	26.6588	25.0118	26.208	25.6902	25.4357	22.238				17	17	17	30.6	30.6	30.6	85.424	0	323.31	2378800000	225
27.7886	27.6604	27.5689	27.9455	27.9887	27.0823	27.3961	27.6758	27.7408	28.1846	27.7514	27.8913	26.8954	27.5598	27.9801	26.6432	27.4993	26.7227	28.3407	27.5051	27.8944	28.3259	27.8205	28.2744	27.29	28.3846	27.5526	28.1793	27.2185	27.9733	27.0496	28.1104	27.8561	28.1097	27.5696	27.8824				8	8	8	24.4	24.4	24.4	59.058	0	323.31	8745200000	276
27.8148	27.4196	27.6135	27.5466	27.7262	27.2828	27.5131	27.5472	27.0739	27.5788	27.3615	27.7014	27.4818	27.584	27.8579	26.5455	27.3526	27.5171	27.5945	27.8552	27.7584	27.5609	27.7595	27.3534	27.7997	28.0963	27.5305	27.4221	27.6603	27.1966	27.2797	27.9605	27.3034	27.8772	27.7218	28.0537				20	20	20	59.1	59.1	59.1	59.366	0	323.31	8062700000	422
27.1554	27.2559	27.318	26.6803	27.4128	26.3579	26.2435	27.0656	26.6874	26.9138	26.276	26.6473	27.0584	26.1198	25.9055	27.0625	26.0967	27.3384	27.6079	25.781	26.3456	27.553	26.8386	27.7929	26.3746	27.6012	25.4	26.9896	27.4374	25.3722	26.2433	26.7387	25.7344	26.4105	26.1257	26.547				6	6	6	53.6	53.6	53.6	16.941	0	178.48	4841000000	173
24.5548	24.998	23.8034	24.9662	25.115	22.5748	24.2364	24.1566	23.6737	24.1948	24.0424	24.3605	24.0345	22.6767	23.0115	23.8492	23.3907	24.3461	24.5355	22.3575	24.9579	25.2469	24.7372	24.147	23.6824	23.7295	23.4727	24.2809	24.0938	23.0206	22.9683	24.626	23.0108	24.0307	21.5523	24.7237				3	3	3	49.6	49.6	49.6	14.984	0	323.31	895490000	86
27.4804	26.3061	26.3223	26.644	26.0767	27.2853	27.1685	27.9713	27.0064	26.6179	26.8946	26.8011	28.4777	25.9104	26.4845	26.4176	26.1524	27.6208	26.5172	27.156	26.7919	25.9454	26.5727	26.7998	26.4412	26.1329	26.437	26.6012	27.3748	26.226	26.5077	26.6022	26.1897	26.6554	26.4733	26.1434				10	10	10	32.7	32.7	32.7	54.234	0	117.73	4929300000	288
27.2278	26.4071	25.7668	26.324	26.3658	25.9178	26.6058	26.7294	26.2863	26.5879	26.6576	26.6161	26.2222	26.3357	26.1571	25.4835	25.1041	26.0477	26.2371	25.6427	26.4319	26.0506	26.6502	26.5828	26.5845	25.9714	26.0417	25.9239	26.7195	25.823	25.7836	26.5671	26.082	26.9051	26.6559	27.0249				4	4	4	46.3	46.3	46.3	13.941	0	323.31	3449400000	164
23.4433	23.4945	23.8856	23.3655	24.56	23.79	23.8731	24.1458	23.3696	23.3404	23.5343	23.8517	24.3773	23.5443	23.3178	23.8371	23.3531	23.5484	23.2438	23.2389	23.4166	23.8934	23.1558	23.841	23.2406	23.81	23.1577	23.0595	23.7379	23.2206	23.004	23.8407	23.8716	23.7195	23.3565	23.6425				5	5	5	27.3	27.3	27.3	20.747	0	30.634	607440000	188
26.0161	25.3024	24.7311	26.1517	25.8766	26.9453	26.8667	26.3549	26.7621	25.7426	26.2943	26.2161	26.6043	27.0597	25.8025	26.0036	25.7198	26.3869	25.8551	25.781	26.1866	25.5434	26.0317	25.806	25.6604	25.3686	26.4118	25.8736	26.415	26.0405	25.9105	25.7272	26.2045	26.107	26.3794	25.9591				8	8	8	32.5	32.5	32.5	46.971	0	44.136	2900700000	125
25.8927	26.7628	27.4092	26.8401	27.3234	26.8521	26.4241	26.5392	26.4018	26.9107	26.8086	26.6105	25.8588	27.3682	27.6974	27.4568	27.3753	26.5189	26.7662	27.958	27.2316	27.3127	26.4522	26.6592	27.3818	27.1012	27.5269	27.4394	26.2475	27.5887	27.5188	26.914	27.1042	27.2651	26.8906	26.5956				21	21	21	33.9	33.9	33.9	122.85	0	323.31	5787600000	519
23.6843	24.6618	23.7568	23.9429	24.7989	23.5121	23.2683	23.3439	23.1907	23.5359	23.1479	23.4717	23.4893	22.9172	23.8898	22.7687	23.1493	23.4569	24.0514	23.492	22.9981	23.3537	23.4826	24.1065	23.7977	23.8887	23.0983	23.6949	23.6092	23.5992	23.4165	24.2149	23.3745	23.6892	23.3141	22.9358				5	5	5	23.3	23.3	23.3	47.025	0	68.801	514850000	116
25.462	25.9215	26.0248	24.845	24.9863	24.7259	24.5177	25.321	24.8995	25.86	24.8503	25.513	23.8349	22.9821	25.6264	26.3676	24.2372	25.1475	25.6724	25.4918	24.9684	25.4894	25.8785	26.1854	25.6515	25.7681	24.87	26.2254	25.8644	25.4147	25.3709	26.0198	25.3538	25.2072	26.0443	24.9784				7	7	7	29.5	29.5	29.5	30.692	0	323.31	1988000000	216
23.1108	23.3504	25.761	23.9999	23.9398	23.6791	24.0034	24.5194	24.8354	25.2696	25.1913	25.3331	24.3584	23.7354	25.2344	24.8914	25.7618	23.8418	24.4476	25.8776	25.4913	24.4508	23.9951	23.5776	25.3877	25.032	25.8795	25.3844	24.0123	25.8173	25.4897	23.268	25.8263	24.8922	24.6396	24.0935				8	8	8	36.2	36.2	36.2	44.875	0	56.95	1296500000	99
26.0063	25.4993	25.1701	26.2005	26.0303	25.9537	25.5626	24.9312	26.1628	24.5674	26.1413	24.7342	26.5542	26.9951	25.1545	25.6863	27.0437	25.1203	24.2589	25.3746	26.6253	25.3221	25.2883	25.8252	25.8251	23.4655	27.1956	24.7573	23.8802	25.8138	26.2711	25.4069	26.66	24.788	26.664	26.8234				18	9	7	63.5	35	30.3	49.857	0	323.31	2757800000	192
25.2359	26.3024	25.985	25.5994	25.8974	24.6482	25.2603	25.0591	24.7337	25.2722	25.3004	25.205	25.2431	24.5919	25.085	25.3349	23.987	26.2321	26.321	25.0661	25.1126	25.7275	25.3341	25.396	26.1506	26.6188	23.8498	26.0348	26.382	24.6013	24.8025	25.9321	24.715	25.0136	24.8089	25.2389				4	4	4	37.3	37.3	37.3	21.639	0	268.85	2023400000	152
24.2179	24.521	25.645	25.1933	23.9062	25.1135	24.8191	23.1393	23.6438	24.5404	24.5534	24.4301	23.351	23.7936	25.061	24.1754	24.2679	21.9595	23.8124	26.0606	24.2907	24.9295	23.6481	24.9053	24.5708	24.3251	25.2109	24.6161	24.9715	25.2379	25.8971	24.4147	24.5595	24.8805	23.7954	24.0866				11	11	11	25.9	25.9	25.9	84.793	0	99.303	1049100000	102
25.8468	24.1031	25.764	26.2681	25.7225	26.0604	24.4788	25.5558	25.7766	26.4216	25.0688	26.1711	25.688	26.1469	25.6714	23.8484	26.4832	24.4607	24.949	24.8541	26.1047	25.1459	27.4693	25.8436	25.4043	26.2984	25.7774	25.419	24.6046	25.8279	26.9454	26.0266	25.927	24.5969	25.6931	27.3458				19	6	4	70.8	25.2	18.7	49.953	0	241.85	2733700000	195
26.7196	26.8419	26.8423	25.9758	26.9233	25.7712	26.2613	25.8441	24.1622	26.4946	25.8082	26.2061	25.5934	23.0682	25.7362	25.555	25.7405	26.4754	26.6674	26.2496	25.9391	26.8602	26.8295	26.9717	26.2003	26.8792	25.3564	26.2186	26.946	25.6478	25.9671	26.6794	25.5826	26.5876	25.3343	26.4344				9	9	9	44.1	44.1	44.1	41.35	0	192.81	3628400000	266
24.9751	24.5207	23.9881	23.5935	24.7761	24.723	24.7455	24.6623	24.3193	23.9535	24.5147	23.6044	24.6366	23.3786	23.7458	24.982	24.7602	24.8118	24.4289	23.7078	23.3495	23.9908	24.5532	24.8388	23.5369	24.3028	22.6248	24.2667	24.6605	23.8393	23.8314	23.456	23.8988	23.9802	24.647	24.2593				7	7	7	28.9	28.9	28.9	52.723	0	51.704	874970000	96
22.196	22.0745	23.99	24.1641	24.4169	23.5117	23.7425	22.8885	22.8959	24.0788	23.4924	23.7684	22.785	21.8117	24.001	22.4476	22.5051	23.9526	23.8378	24.2384	23.5989	23.6957	23.8502	23.7644	24.6988	24.0374	23.9115	24.1245	23.786	23.9023	24.2975	24.312	23.5913	23.5737	23.2957	23.7252				7	7	7	12.6	12.6	12.6	96.221	0	67.605	527920000	163
25.3537	27.153	24.6982	25.61	25.5437	24.4068	24.832	24.7318	24.1446	24.5413	24.6461	24.8718	25.1608	24.2066	24.3371	24.8517	25.9009	25.4308	26.3057	23.151	25.356	24.3998	24.6877	25.0681	25.2339	25.2179	23.6299	24.9165	25.0338	24.119	23.7834	25.4865	24.8484	25.0203	24.5785	24.2413				4	4	4	83	83	83	10.859	0	52.043	2165800000	197
25.3684	25.7814	25.394	25.3335	25.7068	24.2686	25.3924	25.8397	25.4069	25.9738	25.346	25.8056	25.07	25.494	25.2527	24.0161	24.8614	25.4217	25.607	25.7	25.8333	25.415	25.8667	26.1756	25.4694	26.3091	24.8142	25.6329	25.5907	25.26	25.3268	26.1292	25.1607	26.0721	25.8096	25.6455				4	4	4	40.2	40.2	40.2	21.445	0	222.79	1869900000	78
25.2632	26.2806	25.374	25.3002	25.5969	25.4142	25.2814	25.4681	25.0733	25.7492	25.5011	25.7124	25.5289	25.3018	26.2706	25.3322	23.2358	24.9953	25.0038	26.3572	25.4224	25.8741	25.7086	25.1968	25.7945	25.5222	26.0307	26.1546	25.8965	25.8354	25.949	26.1755	25.3526	25.9406	24.8374	25.1063				10	10	10	40.9	40.9	40.9	50.309	0	323.31	2100900000	181
26.3556	27.2117	26.187	25.9369	26.8701	25.8369	25.9134	26.3569	26.3121	26.0381	26.4686	26.0311	26.4177	25.4124	26.2687	25.7389	26.7831	25.8182	26.0163	25.308	28.3575	26.9776	26.3046	27.1279	26.3085	25.8615	24.9289	25.9568	27.0925	25.5974	25.5619	26.7509	25.8881	26.5024	27.168	26.0237				4	4	4	74.7	74.7	74.7	11.25	0	323.31	3599700000	167
23.111	23.19	24.0349	23.2967	23.6702	23.7636	24.3037	23.9674	23.4029	24.0868	23.7787	23.6699	24.219	22.6644	24.7934	22.2808	24.1535	22.3544	24.2864	23.5586	23.0536	23.0047	23.7979	24.2394	23.6155	23.0558	23.2547	24.6857	23.911	23.6991	23.2723	24.6729	23.4345	23.0958	23.6988	22.4655				5	5	5	31	31	31	24.121	0	71.278	561820000	97
24.7642	24.4694	24.6892	24.5689	23.3301	24.3722	24.0315	24.6433	23.7461	24.3999	24.3162	24.271	24.1264	24.553	24.3722	22.2484	22.7327	22.3222	24.2379	24.6675	24.9051	24.4298	24.8026	24.7677	24.8284	24.4256	23.992	24.8515	24.1509	24.5163	24.1286	24.8922	24.9974	23.1247	24.4536	21.6125				6	6	6	36.7	36.7	36.7	33.58	0	291.12	853560000	157
24.5927	24.5189	25.5593	24.8561	25.1949	24.8588	24.4903	24.6693	23.6162	24.9859	23.9819	25.1312	24.5144	23.8383	25.2252	24.4022	24.8213	23.8891	24.5516	25.6389	23.9302	23.3489	23.6817	24.5645	25.3672	25.0882	24.4473	25.1698	25.2487	24.9662	24.7249	25.3899	24.3984	24.7954	24.6969	23.8971				15	15	15	27.9	27.9	27.9	99.96	0	37.264	1275000000	150
25.4406	25.7449	25.4178	23.4777	25.3444	25.4146	25.1702	24.5795	24.9379	24.9326	24.8088	24.9945	25.3443	24.5413	24.1212	24.2849	24.87	25.3067	25.4496	24.2521	24.9784	25.0346	24.5837	25.1642	24.7923	24.3359	24.0065	24.8763	25.456	24.4854	24.3834	24.843	24.3866	25.0119	25.1504	25.1437				6	6	6	36.5	36.5	36.5	30.281	0	196.18	1296400000	154
24.8678	23.2559	24.2579	24.253	23.6649	23.7488	23.7629	24.3307	23.7155	24.2559	23.0892	23.8324	22.8594	23.1404	24.7439	23.5103	23.6842	23.9918	24.4744	23.5394	23.4859	24.4847	25.0976	24.5362	23.8699	24.7362	23.393	24.5947	24.4553	23.9339	23.9042	25.0494	23.8633	23.7918	24.1636	23.453				5	5	5	23.9	23.9	23.9	28.536	0	44.796	769280000	115
27.6037	27.5633	27.5946	27.8539	27.076	27.3925	27.8428	27.924	27.5461	27.3777	27.2697	27.1259	27.6749	27.7536	27.5919	27.3061	26.5637	27.2015	27.4946	27.1476	26.9246	27.1539	27.3253	27.774	26.9811	26.9143	27.1623	27.625	27.5195	27.017	27.1202	27.3736	27.1913	27.1361	27.382	27.0409				8	8	3	54.7	54.7	23.9	22.171	0	296.91	7715100000	388
23.5783	23.6815	23.7974	23.6437	23.3467	23.863	23.5459	23.776	23.6449	23.784	23.0807	23.7291	22.8983	23.1326	23.6443	22.598	22.5524	23.4694	23.8854	23.2469	23.882	24.098	23.3173	23.9076	23.4078	23.1077	22.9031	23.6529	23.6646	23.673	23.2613	23.6518	23.1327	23.7399	22.5496	21.8169				5	5	5	21.9	21.9	21.9	35.117	0	14.273	461050000	88
26.0462	26.4735	25.6544	26.7887	26.1459	26.989	27.5601	25.8677	26.4406	25.9782	26.9032	26.0871	25.1511	27.6144	26.8159	26.5161	26.2648	26.2376	25.5188	26.6453	26.309	26.1498	26.0655	26.7562	26.5063	25.9925	26.1909	26.3415	26.8711	26.0742	26.4833	26.0496	26.5701	26.2287	27.0878	26.5527				18	16	15	43.8	40.1	38.1	61.174	0	323.31	3574800000	231
30.6817	29.3679	28.9302	30.0371	30.631	28.0674	29.063	29.721	29.4744	29.0415	29.9534	29.0613	28.6353	28.0737	28.2691	27.9384	27.8286	29.9376	29.7671	28.0891	28.082	29.234	29.4608	29.7223	29.3081	29.7374	27.5705	29.1284	30.5637	28.2664	28.1811	30.0683	27.9859	29.6276	29.4174	29.7656				7	7	7	80.6	80.6	80.6	10.438	0	233.4	32150000000	253
27.8094	26.8234	26.962	26.768	27.0911	26.1428	27.3932	26.8365	25.3431	26.3559	26.2652	26.8167	27.0111	26.1886	26.2829	26.6108	25.6481	26.4001	27.3015	26.2239	26.1889	26.5555	26.6718	27.2313	27.0795	26.9254	25.9403	26.8681	27.4852	26.8484	25.9691	26.7283	26.6088	26.651	26.4227	26.392				3	3	3	51.2	51.2	51.2	10.116	0	323.31	4336300000	137
23.4269	23.589	24.0914	23.6229	23.5638	23.3312	23.3391	23.4891	23.0224	23.9876	22.6197	24.4145	23.4302	22.5422	22.9127	24.0918	23.2178	22.6392	23.2126	23.3987	22.5273	23.2032	22.8763	23.3948	23.9429	25.3276	23.8807	23.3156	23.6723	21.5999	23.1498	23.1868	23.3218	23.0379	24.3736	25.2371				11	11	11	16.5	16.5	16.5	103.08	0	221.08	471750000	76
26.2146	25.9199	26.1094	26.6775	26.5517	26.5914	26.6055	26.759	26.7761	26.3322	26.3625	26.3462	26.9149	26.4346	25.8237	25.8155	24.6153	26.8783	26.2458	25.6449	26.1703	25.998	26.4127	26.2042	26.1938	26.4668	25.9282	26.4674	26.537	25.3137	25.8504	26.3158	25.9687	26.5061	26.258	26.8174				17	17	17	39.8	39.8	39.8	72.595	0	290.85	3307600000	230
27.1185	27.5728	28.3554	27.4879	27.4506	27.2866	26.8441	28.0361	26.4701	28.1464	27.1229	27.9741	28.0286	26.6349	28.2096	27.4395	26.8132	27.7242	28.04	27.7768	27.0417	28.103	28.2955	27.6782	27.8583	28.0717	27.2803	27.9832	28.0869	28.0053	28.4623	28.0685	27.3926	28.2018	26.9664	27.545				24	24	16	60.7	60.7	40.6	60.626	0	323.31	9513100000	517
25.9684	25.822	25.1635	25.8557	26.6446	25.5908	24.6823	24.6685	24.1934	25.0963	25.1474	24.9844	24.9188	23.3239	24.1204	24.2928	24.0309	25.7398	26.2133	24.6204	25.9317	26.8272	25.8372	25.6839	25.0413	25.5519	23.539	25.1004	25.2784	24.279	24.1825	25.7446	24.3563	25.2698	24.7891	26.4726				7	7	7	63.5	63.5	63.5	18.681	0	217.27	1647900000	180
25.8322	25.9085	26.1203	25.7215	25.8678	23.9244	25.4585	25.4612	24.8906	25.1147	24.8391	25.5267	25.6686	24.5572	24.9387	25.3611	24.6522	26.099	24.7915	25.314	25.4299	25.9613	25.5181	26.0594	25.409	25.5414	24.6353	25.2309	25.5497	24.652	24.8505	26.0181	24.6061	25.612	24.9328	25.483				3	3	3	18.5	18.5	18.5	25.079	0	24.079	1800400000	79
26.6984	25.9388	25.4017	25.894	26.297	25.5029	26.2809	25.4467	26.2382	25.5118	25.5245	25.4855	25.3325	25.887	24.8733	26.5349	25.7989	26.4466	25.5929	25.3561	26.4216	25.8137	25.6956	25.797	24.974	25.8518	25.1804	25.5382	26.4238	24.5645	24.7983	25.5072	25.5726	25.6783	25.6134	26.0441				5	5	5	20.5	20.5	20.5	48.674	0	323.31	2689400000	179
25.9971	25.1631	24.4535	26.2157	26.3317	25.4963	25.2662	24.2898	24.6254	24.9934	25.2151	24.4981	24.7378	24.7213	24.4029	25.0939	24.2236	25.5016	25.4156	24.4129	25.0643	25.5368	25.6114	25.4925	25.0383	24.3903	25.2448	25.3563	24.8282	24.2577	24.5188	25.7158	24.7787	24.7259	25.496	25.6144				4	4	4	25.7	25.7	25.7	23.025	0	183.02	1511300000	88
24.9287	22.6771	24.1198	24.1478	24.0711	24.2779	23.5302	24.4612	24.1945	24.4407	24.2772	24.2683	24.5027	24.5051	24.5138	23.2239	23.3316	23.9115	24.618	24.09	23.9312	24.0608	23.9715	24.647	24.1298	24.2412	24.089	24.1371	24.4216	24.0673	24.2641	24.7022	24.0983	24.7876	24.6337	23.6399				4	4	4	17.2	17.2	17.2	51.172	0	187.03	741180000	122
24.3925	24.3557	25.475	24.7321	25.6002	24.1579	24.9043	25.0746	23.4749	24.8751	24.9784	25.4274	23.6645	23.6837	25.4703	24.6798	23.7096	25.2166	25.0155	25.4829	24.4452	25.8368	25.0271	24.1053	24.3038	25.2449	25.4619	25.7835	24.5415	25.8892	25.6506	23.8761	24.9274	24.5401	24.7519	25.8933				6	5	5	33.2	27.3	27.3	35.619	0	266.7	1327100000	88
25.4585	24.9254	25.3333	25.6678	25.4978	25.5179	24.8223	24.9664	24.8356	24.3962	24.7301	24.8254	24.9349	24.3615	24.3917	24.1707	23.945	25.6407	25.6207	24.4475	23.971	25.7639	25.407	25.627	25.0547	25.6788	23.8487	25.1167	25.1801	24.5472	24.424	25.4286	24.5079	25.2804	24.1993	25.3452				7	7	7	23.1	23.1	23.1	42.449	0	64.506	1348200000	157
24.2917	23.5036	23.9224	23.302	24.0454	24.1283	23.8499	24.5509	23.881	23.2425	22.3686	23.7391	23.8909	24.2731	23.8738	21.2717	22.6317	23.0893	24.1359	24.1989	23.872	23.3807	23.7664	24.2396	23.6042	24.1277	23.0663	23.7319	24.027	23.243	22.8089	23.8334	22.6154	23.6091	23.9498	23.5836				5	5	5	39.6	39.6	39.6	21.439	0	273.01	586410000	97
26.7193	26.3984	25.437	25.7076	23.7568	24.9902	24.301	25.4166	24.9649	26.1144	25.5413	26.0209	24.5512	26.2821	26.549	24.0073	24.0863	26.3654	25.6306	26.6027	25.0732	25.8145	26.2968	25.139	26.2781	26.8904	25.1388	26.4195	26.0341	25.7554	26.0598	26.0235	26.31	27.0232	25.2675	25.3972				16	16	16	24.5	24.5	24.5	108.91	0	323.31	2309300000	171
26.5431	26.5346	25.2097	26.3781	24.0153	26.5006	25.2331	26.5815	24.8475	26.1281	26.0022	26.2019	26.3113	26.0647	26.4011	24.8673	24.7402	24.9685	26.5275	25.5649	25.1823	26.3424	26.0386	26.54	26.3458	26.8506	25.401	27.0515	26.8668	24.9776	25.4164	26.1923	25.8431	25.9919	26.2992	25.7147				7	7	7	28.1	28.1	28.1	34.793	0	167.34	2695300000	149
26.261	25.475	26.1911	26.0498	25.7239	26.0018	26.3564	26.3835	26.7069	25.2008	26.4297	25.8479	25.8075	27.0111	26.1294	25.7226	25.951	25.8789	25.5983	25.8168	26.723	25.716	25.8547	25.8187	25.6949	26.1948	26.199	26.3442	25.2988	25.6543	26.4612	25.6593	25.9258	26.063	25.4752	27.1251				8	8	8	25.5	25.5	25.5	46.48	0	184.92	2861300000	185
25.3836	24.0431	24.6991	25.5341	24.7306	25.3398	25.9829	25.7308	24.8555	24.6483	24.0608	25.1603	25.1884	25.49	24.5654	23.6132	23.6278	25.7717	24.5326	24.8369	24.374	24.6916	25.216	25.2937	23.3935	23.4007	23.8999	24.9786	25.3743	23.5681	23.5026	24.6082	23.9184	24.5213	25.3396	24.1686				8	8	8	52.4	52.4	52.4	22.977	0	28.925	1154000000	123
26.9632	26.9478	26.5045	26.8449	26.4053	26.3544	26.9664	26.8303	26.1385	25.5867	26.2267	25.3491	26.2658	25.9235	24.6978	25.8582	24.0673	27.0598	27.1191	25.3098	26.0909	26.2668	26.6623	26.8795	24.2767	25.0378	24.2494	26.237	27.0926	24.9379	24.8403	26.0589	25.3834	25.8909	26.1834	26.1267				4	4	4	59.4	59.4	59.4	10.921	0	15.2	3154600000	119
27.839	27.4162	27.484	27.6979	28.9482	28.9267	28.2216	28.1293	29.2041	27.6534	28.6778	28.1079	28.456	28.5448	27.5535	28.1866	27.9388	29.0932	27.9389	27.5207	28.4625	28.1342	27.8072	27.8252	27.8734	28.0153	28.4933	27.5502	28.2343	28.4772	28.0723	27.6309	28.1603	28.1922	28.1839	29.5049				10	10	10	58.7	58.7	58.7	40.317	0	142.44	12859000000	262
25.434	24.4462	26.668	25.7322	26.2418	26.2583	25.997	26.1425	25.3278	26.5414	26.5671	26.4373	26.239	25.6497	27.4319	25.0801	25.0461	25.9427	25.378	26.3572	26.0724	26.4574	26.4461	25.1323	26.4629	25.7131	26.204	26.6301	26.2518	26.7163	26.5921	26.8237	26.2243	25.9455	25.687	25.0355				9	9	8	42.6	42.6	38	36.899	0	323.31	3053300000	156
25.8901	24.7758	24.756	25.3983	26.1013	25.8721	25.6561	26.4096	25.0886	25.512	25.2995	25.8407	25.6863	24.4568	25.137	25.2528	25.1639	26.161	25.5945	25.5972	24.8813	25.1219	25.629	25.4177	25.5174	25.4314	25.2264	25.1951	25.8716	25.055	24.7714	25.6765	25.1502	25.2619	25.5859	25.3117				8	8	8	20.4	20.4	20.4	69.917	0	214.48	1865400000	235
24.997	24.9604	25.4304	25.7508	24.8462	25.8216	25.9958	25.6782	26.0529	25.6653	25.2259	24.9228	25.5998	25.8411	26.0322	25.0039	25.5358	24.9708	25.0349	24.7889	25.8343	25.0239	25.2634	25.1533	25.0293	24.1774	26.1846	24.4021	25.218	25.3034	25.7871	25.0922	25.5752	25.1881	25.7231	25.4448				5	5	4	36.9	36.9	31.3	22.367	0	323.31	1922600000	158
30.8501	28.9527	30.6919	26.5334	30.7816	30.1296	30.1788	28.041	29.8878	26.998	31.0646	25.8008	30.4078	26.7526	28.5407	27.8077	30.9105	30.8575	29.6427	28.5962	23.5135	30.6978	30.7115	29.3765	29.5484	29.2084	28.4675	29.2146	28.4128	28.1607	28.028	30.1677	30.1774	28.5821	30.6175	30.8145				3	3	3	10.7	10.7	10.7	35.776	0	82.124	33299000000	90
25.9034	26.3294	25.3209	25.8339	26.8097	25.0762	25.6059	24.621	25.1116	24.841	25.3952	25.2552	25.4027	24.4453	24.2496	25.1401	24.6821	25.9641	25.7231	24.6017	25.6839	25.7145	25.1234	25.6888	25.1641	25.875	24.4664	25.1418	25.7211	24.7813	23.8104	25.2761	24.879	25.0271	25.47	26.0405				5	5	5	57.7	57.7	57.7	15.521	0	201.87	1987500000	169
24.363	25.633	25.0117	25.0007	25.4239	25.2311	24.6357	24.527	24.2736	24.8783	24.1353	24.5831	24.7412	24.4928	24.738	24.6675	25.2608	24.6208	25.5379	24.748	24.1579	25.1347	24.6619	24.8567	24.7508	25.6308	24.8356	24.6652	24.2499	24.4791	24.9501	25.0237	24.0259	24.6959	24.5953	25.523				14	14	14	31.7	31.7	31.7	66.115	0	42.076	1224900000	187
25.0411	25.4375	24.8486	25.2644	25.086	25.5416	24.0018	24.9322	24.8199	25.2319	24.7561	25.01	25.1131	24.7662	25.3123	25.4786	26.1373	24.5099	24.9284	24.9834	26.2477	25.441	25.2231	25.0037	25.092	25.0378	25.1343	24.6006	24.3521	24.8304	24.9802	25.0857	24.4487	25.1478	25.6415	24.8844				7	7	7	29.8	29.8	29.8	44.743	0	52.682	1555400000	183
24.2719	25.8459	25.5945	24.8729	25.0388	24.5044	24.5491	24.8891	24.4244	24.8567	24.4969	24.4852	24.8912	24.3197	25.3982	24.2002	24.9227	24.9869	25.5558	25.034	24.8169	25.5059	24.6368	25.0397	24.7558	25.0367	24.5755	25.2858	24.8313	25.1491	24.8888	25.0292	24.3106	24.6819	23.3861	23.391				11	11	11	55.6	55.6	55.6	31.089	0	323.31	1225000000	135
28.5469	28.2818	28.3244	28.1236	28.1864	28.3277	28.0642	28.5646	27.9353	28.3874	27.7729	28.5283	28.9853	27.8339	28.2365	27.5272	27.2257	28.9816	28.5901	28.1502	27.4473	28.4071	28.3444	28.3902	28.4956	28.5134	27.3856	28.1951	28.784	27.8549	27.9878	28.5879	27.6267	28.5363	27.7795	28.1432				14	14	12	62.3	62.3	55.6	36.748	0	323.31	14159000000	473
26.1735	27.1612	26.795	26.7568	26.5455	26.1835	27.1311	27.2829	24.9551	27.4562	26.2805	27.3583	27.0245	24.969	26.9038	26.3131	26.214	27.3208	26.9299	27.2385	26.7381	27.2326	27.1907	27.0289	27.1504	26.5941	26.1432	27.1917	27.1943	26.6542	26.7913	27.7591	26.5152	26.5969	26.7402	25.7739				8	8	8	37.7	37.7	37.7	37.533	0	323.31	5422800000	310
27.1472	26.3889	26.4224	26.6055	26.3337	26.4127	26.9055	26.3455	26.2747	26.3631	26.3436	26.529	26.8599	26.4101	26.0957	26.0397	24.7222	26.6141	26.8124	26.3915	26.1773	26.5382	26.8641	26.5417	26.1526	26.4273	25.584	26.0002	26.7934	25.6281	25.9696	26.4002	25.5568	26.06	26.43	26.5261				7	7	7	44.9	44.9	44.9	28.338	0	148.4	3494500000	191
23.2881	24.1606	21.7731	23.4363	22.7862	22.6047	23.4951	23.0498	22.8236	22.4212	22.5424	22.7163	22.8107	22.5855	22.0766	22.6505	23.3153	22.9982	23.1023	22.7957	23.901	22.6931	23.0459	23.3551	22.8861	23.6812	22.8544	22.6969	23.4179	22.7932	22.753	23.1806	22.676	22.4224	23.328	23.658				5	5	5	43.4	43.4	43.4	26.748	0	34.665	367010000	99
28.4991	28.1933	27.4536	27.8161	28.1823	27.6126	28.044	28.1771	27.1668	28.1764	27.9183	28.3574	27.569	26.9914	26.771	27.3901	26.9609	28.3288	27.756	27.0164	27.6943	27.9929	28.25	27.9815	27.7838	28.1301	26.8561	27.5278	28.4471	27.2827	27.0762	28.2165	27.2636	27.9843	27.0421	28.0911				21	21	21	47.4	47.4	47.4	82.588	0	323.31	9958200000	611
23.819	25.417	24.5893	25.3115	25.6298	25.0968	24.9096	25.0669	25.2987	25.2364	25.0504	25.3254	25.2862	25.8968	24.7236	25.3917	25.688	25.3782	25.3896	24.5569	25.2102	25.7641	24.9665	25.1524	25.4511	25.2348	24.8894	25.2323	25.5664	25.1466	25.1303	25.3305	25.0287	25.056	25.1687	25.5052				7	7	7	27.6	27.6	27.6	39.594	0	323.31	1745800000	219
24.2996	24.1009	25.193	25.0354	23.5929	25.7982	25.5791	25.8911	25.8999	25.5187	25.8936	25.5671	25.8664	26.4091	25.8499	26.064	26.8516	24.0188	21.4565	26.2722	26.2799	25.8352	23.3351	23.0176	25.8034	25.622	26.908	25.5353	24.2928	26.4944	25.937	24.8356	26.2795	25.2966	25.9313	25.293				24	24	24	27.8	27.8	27.8	174.97	0	302.46	2236700000	269
25.4137	24.9652	25.4924	25.8362	25.8392	26.0029	25.7358	27.2422	25.3696	25.5208	25.8296	25.8914	26.0544	25.3608	25.4456	26.7706	25.9178	25.932	25.5258	26.0017	25.4755	25.7569	25.5721	24.6955	25.5195	25.4048	25.9329	25.8847	25.9596	26.1176	26.1414	25.0721	25.8678	25.7075	25.8903	24.9385				15	15	15	22.5	22.5	22.5	107.23	0	301.86	2298900000	231
26.4822	26.1811	26.4531	26.4689	26.2442	26.8352	26.5358	26.7684	25.8513	26.1956	25.8622	26.5464	26.3884	26.3052	25.9311	25.2058	25.1602	26.8516	26.5429	26.1318	26.4372	26.4832	26.4055	26.6922	26.2028	26.2058	25.7625	26.2369	26.6231	26.177	26.3215	26.429	25.8775	26.341	25.8478	25.922				6	6	6	28.1	28.1	28.1	37.551	0	291.42	3257300000	161
24.9072	23.3142	23.677	23.6073	24.5976	24.1858	24.2432	23.8965	24.7111	23.7216	24.3272	23.9098	24.4797	24.176	23.603	26.3734	24.808	24.4208	23.9647	23.1576	24.3437	23.3815	24.2069	24.1998	23.9725	23.6576	22.7509	23.7994	24.864	23.6396	23.0585	24.2173	23.2799	23.7956	24.8271	24.4187				7	7	7	57.6	57.6	57.6	21.819	0	133.35	869230000	134
23.0614	25.0297	25.4722	24.534	25.0684	24.1178	23.6447	24.7538	24.335	25.195	24.0002	25.1102	25.0114	22.4033	24.4874	24.3447	24.1883	24.9879	25.393	25.0498	24.8199	25.2629	24.6404	24.9641	25.3938	25.6801	24.3359	24.6541	24.8114	24.7583	24.0261	25.4762	24.0478	25.0574	23.8815	24.5766				15	15	15	26.8	26.8	26.8	103.96	0	175.37	1104900000	188
29.1758	31.8544	28.146	28.8847	28.5545	28.3724	28.4011	28.8731	27.7025	28.703	27.8346	28.288	29.2535	26.5266	28.1142	30.0852	29.7057	29.0729	28.4118	27.9067	28.6085	29.2866	29.025	29.3918	27.8234	30.0527	27.036	28.5548	29.4781	27.9863	27.2255	28.6957	28.4647	28.8905	28.4601	29.2237				5	5	5	70.4	70.4	70.4	9.0564	0	128.9	36728000000	407
25.568	26.0434	25.6781	25.94	25.7689	25.3862	25.6254	25.5972	25.0927	25.9362	25.55	26.0007	25.6847	25.2337	26.2129	25.9568	25.9287	25.6345	25.9491	25.8743	25.8265	25.9681	25.8096	25.2532	26.0723	25.9804	26.3608	25.7387	25.6068	26.033	26.196	26.0274	26.1417	26.1318	25.6118	25.5786				17	17	17	20.7	20.7	20.7	134.46	0	323.31	2595500000	238
25.587	25.7386	26.3626	26.4475	25.1001	26.4578	25.3917	26.073	25.4852	26.2353	25.6817	26.8912	26.0482	23.1154	25.0771	25.8324	25.424	26.0905	25.6374	26.141	25.1372	26.4784	25.4116	26.4366	26.0472	26.6481	26.0474	26.3937	25.8831	25.7918	25.9276	27.1024	25.2833	25.8428	26.6697	25.6027				7	7	7	35.5	35.5	35.5	38.449	0	323.31	2899400000	175
24.2076	25.3719	23.3483	24.4012	24.9888	24.5337	24.8723	24.3043	24.529	23.6141	24.4265	24.1015	24.3348	24.4368	24.0169	24.6433	25.3926	24.9008	24.8131	24.2353	24.6232	24.931	24.1447	24.7428	24.4546	23.9965	23.8158	24.3184	24.4499	23.7534	23.8162	24.3541	23.9622	24.5592	24.6837	24.5565				5	5	5	33.8	33.8	33.8	22.151	0	323.31	962260000	130
25.3664	26.6798	26.3085	26.7851	27.2587	25.5824	26.3644	26.174	25.7459	25.9318	25.8312	26.3961	26.1806	25.5272	25.6986	25.616	25.5914	26.545	26.4672	26.0583	26.1516	26.6133	26.4062	26.5133	26.6106	25.9103	25.4265	25.9798	26.1232	25.3166	25.3314	26.4721	25.5567	26.1749	25.4015	25.6384				6	6	6	34.9	34.9	34.9	25.059	0	305.49	2913200000	119
25.9503	25.0956	26.4917	25.3326	25.2541	25.5203	25.0832	25.3552	26.2787	26.4099	26.0209	25.9752	26.5346	26.031	26.51	25.3683	25.8461	25.6329	25.5178	25.9558	25.9746	26.2224	26.0657	25.4935	26.1293	26.7686	25.803	26.3371	26.2625	25.9578	25.7441	26.5037	26.0141	26.5863	26.8889	25.3271				8	8	8	44.5	44.5	44.5	35.668	0	323.31	2721700000	173
28.9213	26.2699	25.3916	27.8351	26.9441	26.8454	27.6157	26.8055	27.0097	26.2132	26.5963	26.3835	25.5908	26.7764	24.3266	26.0604	24.9461	28.0914	24.5513	25.4048	24.7828	24.114	26.3427	26.175	25.9927	25.9745	24.3242	25.2648	27.9016	25.4188	24.9701	26.1063	25.2396	26.2454	26.9862	27.4985				3	3	3	12.5	12.5	12.5	33.868	0	245.01	5097800000	167
25.8427	25.7328	25.6685	25.5822	25.0411	25.3556	25.3101	25.487	24.7626	25.6788	25.0411	25.7335	25.4417	24.4625	25.3078	25.3689	25.1257	25.0015	25.6178	25.6163	24.0658	25.5093	25.9181	25.1785	25.3949	25.9427	25.3919	26.0148	26.0266	25.6033	25.6932	26.1056	24.8968	25.6117	25.4182	25.5954				15	15	15	43.4	43.4	43.4	71.223	0	323.31	1895000000	279
24.7985	24.5027	24.9306	23.6917	24.6961	23.7682	23.7623	23.7488	23.7694	24.0692	23.8456	24.4444	23.89	23.5243	24.2274	25.0016	24.3602	23.7969	24.2961	23.8104	24.8692	24.0072	24.2859	24.781	24.1172	24.7071	23.6721	24.507	24.3766	24.2081	23.8518	24.2666	22.8259	24.5647	24.0238	24.3611				4	4	4	25	25	25	30.381	0	241.82	1169300000	214
26.106	24.0943	25.0765	25.292	25.3184	24.2884	25.1971	25.0537	24.6786	25.5201	25.0014	25.2787	25.8043	24.3549	25.4184	25.016	24.4169	26.1757	25.8973	25.3189	24.6551	26.0679	25.501	25.1889	26.0656	26.7378	24.7001	24.8283	26.1626	24.8071	25.0181	26.4127	24.8103	25.7373	23.9829	25.989				9	9	9	32.2	32.2	32.2	61.874	0	261.53	1770200000	129
24.4536	24.5219	24.6421	24.4357	24.7959	24.0801	24.7336	23.899	23.9781	23.6269	24.1978	23.4907	24.2373	23.6279	23.5204	24.0383	25.5226	23.6231	25.1313	23.2509	24.5647	24.1388	24.0367	24.9129	23.2946	23.856	23.1265	24.1343	24.3754	22.2821	23.5906	24.0976	23.5691	23.9423	23.8978	23.8076				3	3	3	50	50	50	12.878	0	65.913	941160000	83
27.109	27.5428	27.3558	27.3445	27.0525	26.4517	26.4482	27.348	26.3127	27.5201	26.6881	27.3377	27.0653	26.6937	28.0356	26.8667	26.0293	26.455	27.961	26.8168	26.9199	27.6986	27.274	27.7045	27.2213	28.1691	26.8103	27.4724	27.3033	27.1436	27.1364	27.9005	27.0508	27.3336	25.5259	26.4997				11	11	11	25.7	25.7	25.7	64.681	0	323.31	6604700000	308
24.0921	24.1692	23.013	24.1573	25.578	23.5592	24.19	23.6336	23.789	23.5671	23.8689	25.0794	24.0527	22.7538	23.0192	24.9664	24.0689	24.728	23.4644	23.1008	24.5956	24.2836	24.3469	24.0461	23.9135	22.9024	23.1625	23.789	23.7598	23.5788	23.3697	24.0469	23.9726	22.769	24.8442	26.0574				9	4	4	20.2	10.3	10.3	65.695	0	323.31	782760000	101
26.8069	25.9959	25.6842	26.3851	26.0913	25.6422	26.1433	26.3515	25.5378	25.9432	25.7318	25.8448	25.7583	25.6076	25.113	25.5519	24.94	26.3717	25.8623	25.3157	25.7789	26.3282	26.4594	26.1403	25.7756	25.8892	25.0348	25.2325	26.2106	24.9159	25.3023	26.1071	25.059	25.9175	25.8745	26.403				3	3	3	29.2	29.2	29.2	16.648	0	317.23	2346200000	106
23.8983	23.9336	25.2653	25.4095	24.2945	25.005	24.9771	24.3494	23.4356	25.2414	24.3619	25.4486	24.9125	24.8514	25.5775	23.6645	24.502	23.8403	24.4193	25.3494	25.1462	24.993	24.7866	25.3464	24.8505	23.1532	25.4628	24.904	24.4347	25.3639	25.0665	25.7394	24.8125	24.9801	24.0281	23.746				11	11	11	38.8	38.8	38.8	55.399	0	116.99	1244600000	154
24.0268	24.388	24.1671	24.0441	24.3475	23.7512	23.8475	24.2901	23.6944	23.8294	24.0532	24.4289	24.0258	23.2984	23.95	23.9751	24.3449	24.1284	24.6257	23.7278	23.8583	24.6282	24.2285	24.4631	24.0547	24.4239	23.5142	24.2185	24.4015	23.3351	24.0026	24.1954	24.131	24.1241	24.2153	23.9292				6	6	6	20.2	20.2	20.2	59.844	0	92.932	716300000	102
25.0119	24.4466	24.3674	24.9406	25.4093	24.447	24.7803	25.1304	24.6942	24.8895	24.7906	24.4717	24.5985	24.1395	24.4507	24.9593	23.9038	25.3026	25.1445	24.2971	23.5879	24.7228	25.2008	25.1621	24.691	25.3633	24.091	24.9115	25.4323	24.0559	24.111	24.8173	24.2586	24.9201	25.1105	24.5151				7	7	7	50.2	50.2	50.2	28.932	0	105.8	1152400000	173
22.8117	23.5122	24.1346	23.4068	24.0132	23.3562	24.1413	24.3915	23.6681	23.6318	23.9164	24.5052	23.749	23.3543	24.5974	23.5395	24.298	23.3346	23.4634	24.4008	23.9618	24.0079	23.6618	23.392	23.8075	23.8735	24.395	23.9175	23.8299	24.1366	24.2654	23.6332	23.9285	23.9035	23.0366	23.8974				13	13	13	19.7	19.7	19.7	123.91	0	323.31	601680000	119
21.731	24.1087	23.2755	21.5486	23.3525	22.3296	22.3949	22.1943	22.3624	22.4137	22.1433	23.2468	22.6196	22.7454	22.8093	24.5671	23.1438	22.4524	22.7086	23.5965	23.2874	23.0352	22.36	22.9384	23.2247	23.8978	22.6023	22.8405	22.7293	22.5033	22.44	22.6594	22.9495	23.0787	21.8191	22.783				8	8	8	19.3	19.3	19.3	86.041	0	103.73	333670000	72
28.7573	27.8029	28.4811	28.2774	28.4683	28.9825	28.5302	29.6002	27.8163	27.7489	27.8757	27.6074	29.6759	28.2381	28.1746	28.1379	27.6731	29.0762	28.4358	28.5342	28.0623	28.001	28.4047	28.9405	27.9924	28.4554	27.5328	28.5334	29.3308	27.5157	27.6375	28.3659	27.5873	27.9496	28.1434	27.6929				15	15	15	63.7	63.7	63.7	37.375	0	323.31	14098000000	503
27.0108	27.1817	27.7801	27.5978	27.36	26.6471	27.3023	27.5545	27.0385	27.5765	26.9242	27.2151	27.3397	26.4155	27.5004	26.6625	26.4592	27.3067	27.5649	27.618	27.1843	27.3508	27.5404	27.3187	27.823	27.9294	27.1105	28.0286	27.5327	27.3348	27.1441	27.8965	27.0021	27.1434	26.6879	27.2935				7	7	7	31.4	31.4	31.4	48.207	0	323.31	7385400000	305
26.0956	26.5335	25.2093	25.8768	25.1516	24.9862	25.0232	25.9548	23.754	25.8603	24.4347	25.4923	25.3042	23.1771	25.1255	26.243	24.9197	25.3278	25.7223	24.658	27.028	23.946	24.8342	25.9716	25.8059	25.1189	23.6701	25.6977	25.3347	25.3241	25.4091	25.207	25.4474	26.2194	24.8628	24.5337				4	4	4	57.3	57.3	57.3	11.602	0	224.71	2403400000	150
27.8866	26.9706	26.4203	26.9733	27.9091	26.868	27.2261	26.3128	26.6756	26.6752	26.5625	26.2528	27.5254	26.2449	25.3573	26.2523	25.1249	28.5923	27.0852	26.2738	26.4277	27.1166	27.4953	27.7383	26.6952	27.2397	25.2472	25.4397	27.5991	25.9743	25.2896	26.4925	25.7695	27.2274	26.8806	27.8535				4	4	4	55.2	55.2	55.2	16.014	0	323.31	5395500000	204
23.3789	25.0254	23.8777	24.2379	25.23	24.9163	23.8354	24.5046	24.1581	25.2562	24.0858	24.1866	23.9173	22.5934	24.5128	24.159	24.1771	21.4697	25.3947	23.6936	24.8904	25.1842	23.863	24.6466	24.3754	25.1585	23.6633	24.2466	22.0975	24.459	23.9755	24.707	24.0933	24.578	23.6524	24.711				10	10	10	26.9	26.9	26.9	79.663	0	241.64	891120000	112
27.0475	26.2751	25.9016	26.5601	25.9512	25.8712	26.1574	26.3678	25.1548	26.5439	25.9094	26.1658	25.8411	26.0292	25.8197	25.6327	24.9256	26.5084	26.116	23.7308	25.5779	26.0946	26.8284	26.4981	24.7873	26.0355	25.624	26.2499	26.0807	25.9968	25.5558	26.5248	25.7536	26.1944	25.3242	26.9126				7	7	7	42.9	42.9	42.9	24.327	0	323.31	2803400000	165
25.2321	25.4808	26.8932	26.2378	25.4663	25.3608	25.7431	25.469	24.1396	25.2987	24.3559	25.0242	25.5049	24.899	26.4962	24.2635	24.3574	25.4087	25.7244	25.8338	24.5584	25.2412	25.881	26.0198	25.5058	24.7663	25.2184	25.9575	25.7478	25.1388	25.7715	25.7572	24.8704	25.0907	24.8133	24.0868				4	4	4	14.4	14.4	14.4	32.463	0	42.092	1818600000	68
22.1907	22.9411	23.8939	23.6405	22.9805	23.6287	23.3218	22.863	23.1675	23.0081	22.8321	24.4875	23.7267	23.265	24.1377	22.748	22.6013	23.6899	23.4065	23.0555	22.7966	24.3311	23.7832	23.3473	23.157	23.4229	23.4473	23.8826	23.7723	23.8103	23.8125	24.3483	23.251	23.1975	22.1211	23.3228				8	8	8	9	9	9	150.56	0	87.619	470150000	83
21.9317	24.6947	22.0917	21.6944	22.529	21.8782	21.5925	21.7877	21.7507	22.5785	22.4264	21.872	22.5222	22.6076	22.4738	22.812	23.0386	22.4616	21.9252	22.4236	21.7659	22.3865	21.5075	21.9429	22.6268	22.4429	22.482	22.5745	22.1462	22.3508	21.7007	21.8915	21.6642	22.3224	22.6121	21.8042				4	4	4	15	15	15	51.199	0	37.184	300070000	61
23.8165	23.9997	24.5898	24.0358	23.8433	24.2954	24.1143	24.245	24.1351	24.4612	23.7489	24.057	23.8598	24.4262	24.9354	23.6178	23.5324	23.9496	24.2357	23.6334	23.9537	24.1085	24.4628	24.0128	23.3217	23.3924	24.0837	24.4301	23.7748	24.2415	24.8819	23.9939	24.323	24.2516	24.2739	24.1073				4	4	4	22.7	22.7	22.7	24.347	0	53.503	705230000	92
29.0371	29.2859	28.7284	28.4166	28.3176	29.1195	28.2488	29.5359	28.027	28.3177	27.8888	28.6839	28.997	26.9384	28.5575	29.612	29.2581	29.288	28.7195	28.704	28.0936	28.5532	28.7507	28.9174	28.9895	29.1292	27.6118	28.7129	29.3485	28.1973	28.0429	29.1591	28.035	28.1995	28.6787	28.3308				9	9	9	49	49	49	27.401	0	323.31	20372000000	405
27.5831	27.1451	26.8477	27.0913	27.4079	27.1471	27.4955	27.369	26.4311	27.1387	26.4999	27.1571	27.2365	25.039	26.8747	27.4371	27.4456	27.5308	26.8241	27.2628	27.3863	27.4348	27.0796	27.6676	27.472	28.2306	25.8415	27.2139	27.4113	26.8033	26.4634	27.5945	26.3861	27.309	26.6574	26.4996				15	15	15	54.1	54.1	54.1	52.428	0	230.94	6076700000	277
25.8801	25.0064	25.5158	25.5508	25.8456	26.0108	25.6685	26.3689	25.9051	25.7661	25.4069	26.0652	25.7209	26.3432	25.7075	25.2818	25.7209	26.1803	25.8464	26.369	25.9715	25.5909	26.2132	25.6561	26.0092	26.1126	26.0413	25.6975	25.8101	26.0291	25.954	26.0794	25.5544	25.9537	25.3878	25.1336				6	6	6	20.3	20.3	20.3	53.248	0	209.21	3060800000	268
27.0011	27.0913	26.5493	26.403	25.9584	26.7727	26.3965	27.4831	26.4078	25.8478	26.104	26.0424	27.4768	26.3333	26.2852	26.8421	25.4406	27.3849	26.3296	26.4024	26.2843	26.2548	26.5836	27.1357	26.2736	25.916	25.6127	26.6248	27.332	25.8497	25.572	26.1987	26.0804	25.9606	26.7496	26.8092				8	8	8	46.7	46.7	46.7	21.627	0	323.31	4010400000	229
24.7741	24.6989	24.9678	24.5164	24.823	24.8422	24.4304	24.8889	24.331	24.3575	23.0288	24.708	25.1004	24.5188	24.4228	23.7075	24.009	25.0135	24.5708	24.1077	25.0044	25.3756	24.4819	25.0258	24.7855	24.9333	23.879	25.0369	24.4583	24.6418	24.0127	24.758	22.8824	24.8611	24.0625	25.0642				6	6	3	23.2	23.2	11.5	53.926	0	323.31	1001400000	79
24.7895	24.758	24.8359	25.358	25.2623	25.2361	25.0691	24.3215	24.5075	25.544	25.0863	25.801	25.0032	25.5522	26.0665	24.514	24.5012	24.7579	25.216	25.8593	25.2391	25.3249	25.4127	24.7346	25.6536	25.0907	25.464	25.5287	25.4044	25.9078	25.6912	25.8606	25.5394	25.7913	24.0024	24.3723				6	6	6	23.4	23.4	23.4	55.18	0	55.107	1674900000	132
27.5388	28.2374	26.6197	27.4455	28.081	26.7503	27.195	26.8473	26.7111	26.7512	26.6602	27.3103	27.185	26.4813	26.3928	27.5593	27.3038	27.7114	27.0999	25.9404	27.3758	27.3955	27.2664	27.3854	26.7723	27.2769	25.9634	26.8888	27.1904	26.426	25.996	27.3917	26.6197	26.8401	27.1832	27.9166				13	13	7	45.5	45.5	32.3	62.518	0	323.31	6850500000	404
25.4252	25.9604	25.0728	25.53	26.0781	25.5521	25.0631	25.2717	25.0206	25.4048	24.959	25.9273	25.5107	24.1792	25.3582	26.4049	26.3637	25.4881	25.5374	25.5556	27.002	25.5962	25.66	24.7771	25.2451	25.4937	25.4178	24.9456	25.4266	24.8928	25.3214	25.3145	24.895	25.1316	25.4433	25.717				13	13	13	48.9	48.9	48.9	42.945	0	323.31	2097700000	248
24.4491	26.0498	24.9232	24.7157	25.8605	24.3024	24.2847	24.4081	24.2191	24.865	24.3392	24.9858	24.3911	24.3099	24.0154	25.1427	25.0922	25.1107	25.2122	24.0515	24.8343	24.984	24.7436	24.865	25.1771	25.626	23.9446	24.5868	24.5362	24.048	24.25	24.9269	24.6787	24.6754	24.159	25.0812				6	6	3	18.4	18.4	7.1	47.873	0	136.33	1223600000	85
26.6937	26.5879	25.9084	26.9358	27.3541	26.3246	26.6435	25.5982	26.0172	26.9629	25.8256	25.9222	26.2968	25.7655	26.5552	25.4982	25.2579	26.9936	27.0801	25.9627	26.0526	26.5605	26.4075	26.1753	26.5384	26.6273	25.2263	26.8363	26.461	25.8359	26.0689	26.4361	25.794	26.6915	25.577	26.3748				7	7	7	29.2	29.2	29.2	40.572	0	323.31	3367500000	153
25.8068	24.6491	25.9249	25.6323	25.8717	25.0245	25.4137	25.2697	24.8352	25.5145	24.8987	25.4968	25.2046	23.9886	24.9701	25.2119	25.1314	25.9387	25.171	25.0231	25.4076	25.8862	25.6155	25.9405	25.7302	26.3438	24.5815	25.5395	26.2461	24.974	24.9388	26.0314	24.9349	25.1424	24.8489	25.6873				12	12	12	28.6	28.6	28.6	96.723	0	105.46	1813500000	195
25.7079	26.457	25.8789	26.8483	27.1398	25.7577	26.4953	25.8826	25.7944	26.2207	26.1318	26.6147	26.0925	26.1798	25.8393	25.7366	25.2521	26.2979	26.6357	25.9289	26.1222	26.5463	26.2766	26.3342	26.6509	26.6933	25.713	26.188	26.4152	26.225	26.3032	26.7178	25.5553	26.5222	25.5287	26.2787				11	11	11	7	7	7	299.61	0	245.09	3101600000	187
25.5895	25.7333	24.9396	25.9751	26.2436	25.535	25.4006	25.4299	25.4329	25.7351	25.6054	25.826	25.9361	25.7909	25.764	25.3234	24.5293	26.3726	26.1539	25.7321	25.9892	26.0287	26.119	25.8347	25.7057	25.8267	25.35	25.5737	25.3866	25.603	25.4444	26.2573	25.5906	26.0185	25.9422	25.5886				9	9	9	33.2	33.2	33.2	43.786	0	323.31	2426900000	275
24.4203	26.4345	25.0892	25.2329	24.3467	24.894	24.7636	24.8939	24.6593	25.0445	24.8471	25.332	24.6799	24.2428	24.915	25.8983	26.5123	24.1436	24.6732	25.1913	25.6383	25.2152	25.3709	25.1523	25.5393	25.08	25.484	25.1991	25.0324	25.1056	25.1714	25.2472	25.0319	24.3599	25.0587	24.6799				9	9	9	45.5	45.5	45.5	28.068	0	323.31	1794800000	275
26.3658	26.5119	26.892	27.001	26.8969	26.8236	26.7159	26.4681	26.1308	26.8761	26.5332	27.0477	26.8315	26.6803	26.974	26.0043	26.1805	26.7562	26.681	26.7588	26.5185	26.614	26.9999	26.5322	26.8348	26.8829	26.7338	26.8731	26.7797	26.9077	26.846	27.0912	26.5063	26.9318	27.0279	27.3253				16	16	16	51.2	51.2	51.2	51.156	0	289.57	4763100000	342
25.649	25.7133	26.006	25.7587	25.8013	25.5362	25.7565	25.6588	25.3163	25.723	25.2999	25.924	25.3838	25.5232	26.1125	25.1402	25.164	25.8092	26.4227	26.1054	25.1627	26.1849	26.2746	25.9651	25.8762	26.3057	25.6642	25.7406	25.8359	25.6231	25.7086	25.9317	25.4827	25.7326	25.5933	25.9064				13	13	13	37.8	37.8	37.8	61.013	0	323.31	2168900000	266
25.6823	25.8212	26.1046	22.8056	25.9406	25.9163	25.5328	25.3099	24.7696	25.8669	25.3809	26.1584	25.3994	25.5982	26.005	25.4784	26.2795	24.8619	25.6784	25.8841	25.963	25.8347	25.6003	25.278	26.024	26.2196	25.7072	25.6812	25.5052	26.0885	26.1392	25.9341	25.5161	26.0497	26.1454	25.8947				10	10	10	36.6	36.6	36.6	50.227	0	122.5	2249300000	182
25.0871	27.0783	24.9091	26.1003	26.2114	25.222	24.99	24.7963	24.6469	24.7312	24.5847	25.3923	25.3117	24.6125	24.74	25.9674	26.4456	25.4824	26.0332	24.8769	25.3738	25.6242	25.0978	25.4276	25.6866	26.4408	25.0313	25.1091	25.1247	24.6416	24.7506	25.7568	24.6762	24.8407	24.9396	26.0019				7	7	7	21.3	21.3	21.3	57.563	0	218.3	2796200000	284
22.866	24.6641	24.3483	23.941	24.0055	23.5453	23.9248	23.6725	23.2696	24.237	23.9021	24.3314	24.059	22.5758	24.1779	23.5843	25.4723	24.0994	24.4866	24.0254	23.5437	24.2972	24.0274	23.8501	23.9259	24.1185	24.2219	23.7243	23.6393	23.5328	24.1533	24.0719	23.3785	23.9394	23.4076	23.7778				7	7	7	29.4	29.4	29.4	40.542	0	216.46	696330000	153
28.1915	28.9951	26.273	27.9191	27.1398	27.6726	28.6647	27.181	27.953	26.6748	28.1086	26.8477	27.5349	27.6521	25.5396	27.746	28.0115	28.1583	27.3103	26.326	28.1471	27.3835	27.4062	27.1835	27.3636	26.9884	27.1566	26.9785	27.6282	26.4687	26.004	26.988	27.2679	27.0623	27.2333	28.1046				5	5	5	44	44	44	20.652	0	323.31	9114900000	207
22.679	24.6364	23.9279	22.9785	23.9609	22.8503	22.8349	23.3243	23.0332	23.3978	23.0574	23.3687	23.4448	22.7462	23.3617	25.536	24.0243	23.4801	23.9305	23.9898	23.0482	23.7532	23.2785	23.4483	24.3951	24.5835	22.879	23.6412	23.3106	23.4916	23.4539	23.4896	23.0541	23.2344	22.8159	23.2081				3	3	3	8.3	8.3	8.3	54.793	0	156.13	613060000	154
26.1736	26.1324	25.9282	24.7153	24.8587	26.3949	26.3587	27.1149	25.0322	25.905	25.7632	25.6703	26.6506	25.7407	26.3141	26.1593	25.4421	26.558	25.5839	26.5098	25.4847	26.2162	25.4677	26.9438	25.1443	25.5169	25.8353	26.179	25.4832	25.8989	26.2293	25.7209	25.4124	25.7796	26.3986	25.5088				7	7	7	49.6	49.6	49.6	25.497	0	323.31	2666000000	180
25.2846	24.9905	25.0123	24.7955	24.933	25.1441	25.5089	24.9791	25.2351	24.6204	24.1139	24.1313	24.9025	25.1638	23.7102	25.1257	25.143	23.7841	24.919	24.0215	24.9948	23.6634	24.6642	25.1204	24.6088	24.3219	23.6664	25.0797	25.2806	23.9012	23.4414	24.7015	24.4872	23.96	25.8099	24.9797				5	5	5	73.6	73.6	73.6	13.507	0	111.44	1208700000	135
[truncated: 33 more rows]
[truncated: 4 more columns]
