# Supplementary material for: Classic Hodgkin Lymphoma Refractory for ABVD Treatment Is Characterized by Pathologically Activated Signal Transduction Pathways as Revealed by Proteomic Profiling
Source: Cancers (Basel). 2022 Jan 4;14(1):247. doi: 10.3390/cancers14010247 (PMC8750842; doi:10.3390/cancers14010247)
Supplement: Supplementary file 1 [file cancers-14-00247-s001.zip › Supplementary Table S4.xlsx]

## Sheet: Vulcano plot 60 percent 2473 pr
Significant	=-LOG(P-value)	Difference	Protein IDs	Majority protein IDs	Protein names	Gene names	Symbol color	Symbol type	Symbol size	Show label	Only identified by site	Reverse	Potential contaminant	Peptides	Razor + unique peptides	Unique peptides	Sequence coverage [%]	Unique + razor sequence coverage [%]	Unique sequence coverage [%]	Mol. weight [kDa]	Q-value	Score	Intensity	MS/MS count	LFQ intensity r1001	LFQ intensity r122	LFQ intensity r150	LFQ intensity r152	LFQ intensity r163	LFQ intensity r174	LFQ intensity r194	LFQ intensity r515	LFQ intensity r551	LFQ intensity r554	LFQ intensity r567	LFQ intensity r580	LFQ intensity r591	LFQ intensity r600	LFQ intensity r609	LFQ intensity s109	LFQ intensity s113	LFQ intensity s143	LFQ intensity s145	LFQ intensity s17	LFQ intensity s182	LFQ intensity s187	LFQ intensity s197	LFQ intensity s206	LFQ intensity s45
	3.2132	0.338672	Q9H0U4;Q92928	Q9H0U4;Q92928	Ras-related protein Rab-1B;Putative Ras-related protein Rab-1C	RAB1B;RAB1C	Color2 [DarkGray]	1	4					8	8	3	54.7	54.7	23.9	22.171	0	296.91	7715100000	388	27.6037	27.5633	27.5946	27.8539	27.076	27.3925	27.8428	27.924	27.5461	27.3777	27.2697	27.1259	27.6749	27.7536	27.5919	27.3061	26.5637	27.2015	27.4946	27.1476	26.9246	27.1539	27.3253	27.774	26.9811
	3.20782	0.517351	O15173;O15173-2	O15173;O15173-2	Membrane-associated progesterone receptor component 2	PGRMC2	Color2 [DarkGray]	1	4					3	3	3	18.4	18.4	18.4	23.818	0	180.37	2125700000	105	25.8099	25.4107	25.7087	25.7813	25.8183	25.9009	26.2869	NaN	25.9701	25.5595	25.9703	25.493	25.6939	26.1227	25.957	25.2099	25.48	26.4222	25.4153	25.3057	25.6187	25.272	25.1372	25.2797	25.4692
	2.97611	0.326059	Q641Q2-2;Q641Q2	Q641Q2-2;Q641Q2	WASH complex subunit FAM21A	FAM21A	Color2 [DarkGray]	1	4					10	10	2	15.1	15.1	3.7	144.94	0	173.9	531290000	123	23.5699	24.1154	23.9092	23.5938	23.6559	23.8966	24.341	23.7325	23.6605	23.5237	24.1727	23.7765	24.0054	23.7797	23.7754	23.4311	23.0702	23.7406	23.5054	24.209	23.8344	23.7454	23.4599	23.3574	23.9662
	2.94843	0.677561	Q9NX08	Q9NX08	COMM domain-containing protein 8	COMMD8	Color2 [DarkGray]	1	4					4	4	4	30.6	30.6	30.6	21.09	0	13.419	338480000	27	24.035	23.0065	23.7309	23.4994	23.1005	23.328	24.0855	23.7362	23.5897	23.3462	23.758	23.1917	24.1247	NaN	NaN	22.4874	22.5614	23.6306	NaN	23.2429	22.8433	NaN	NaN	23.4427	22.393
	2.72045	-0.87716	P02652	P02652	Apolipoprotein A-II;Proapolipoprotein A-II;Truncated apolipoprotein A-II	APOA2	Color2 [DarkGray]	1	4					3	3	3	43	43	43	11.175	0	323.31	2768500000	99	26.3198	25.2627	25.1937	25.7596	25.35	24.7123	23.2022	25.0436	25.2082	24.7241	25.9316	25.6211	25.5811	25.8409	25.2008	26.7594	25.2975	24.8104	25.5626	25.3331	27.6031	24.7023	26.5391	26.0873	26.1502
	2.59484	0.677763	P28676	P28676	Grancalcin	GCA	Color2 [DarkGray]	1	4					8	8	8	36.9	36.9	36.9	24.01	0	150.45	3883600000	192	26.4825	26.2379	27.2661	27.4077	26.6146	26.6786	27.7286	25.5341	27.5736	26.0539	26.8295	26.9041	26.914	26.9339	26.2106	25.7823	25.7889	25.6788	26.4183	25.541	25.9858	25.8737	26.0801	27.0072	26.2837
	2.52107	0.651102	Q96B36;Q96B36-2;Q96B36-3	Q96B36;Q96B36-2;Q96B36-3	Proline-rich AKT1 substrate 1	AKT1S1	Color2 [DarkGray]	1	4					2	2	2	11.7	11.7	11.7	27.383	0.00027556	5.1583	146190000	27	NaN	NaN	NaN	23.0623	23.7071	22.2261	22.9563	NaN	23.5111	22.6451	23.0301	22.6094	22.2546	NaN	NaN	NaN	22.3318	NaN	22.4961	21.8286	NaN	22.666	21.9798	NaN	22.8808
	2.47009	-0.670746	Q15477	Q15477	Helicase SKI2W	SKIV2L	Color2 [DarkGray]	1	4					13	13	13	19.3	19.3	19.3	137.75	0	119.95	470690000	91	21.8059	NaN	23.4278	23.6026	23.935	22.4753	22.3893	22.7536	22.9169	22.9619	22.7652	24.0002	22.9113	23.0964	22.8936	NaN	24.0888	23.2367	23.3088	24.2075	24.6919	23.6051	22.5012	22.9908	24.4844
	2.37685	0.690186	O00182-3;O00182-2;O00182-6;O00182;O00182-5;O00182-4	O00182-3;O00182-2;O00182-6;O00182;O00182-5;O00182-4	Galectin-9	LGALS9	Color2 [DarkGray]	1	4					5	5	3	25.4	25.4	15.8	34.69	0	78.343	2159000000	132	26.3609	26.0383	26.0822	25.6706	25.68	26.7169	26.0282	26.0611	25.0532	25.7406	24.9301	24.9519	26.758	25.3135	25.7485	24.5059	24.6893	26.1591	25.1879	26.7046	24.6755	25.1696	24.3477	26.1643	25.7168
	2.35814	-0.362208	Q14152;Q14152-2	Q14152;Q14152-2	Eukaryotic translation initiation factor 3 subunit A	EIF3A	Color2 [DarkGray]	1	4					20	20	20	21.1	21.1	21.1	166.57	0	323.31	7682100000	501	26.7705	27.7588	27.5304	27.5769	27.8915	27.0751	26.9556	26.9905	26.5267	27.507	26.8969	27.5441	27.0928	26.8186	27.1492	27.5656	27.5322	27.1002	27.7689	27.6935	27.4129	27.7837	27.6927	27.185	27.8246
	2.31757	-0.6783	Q93008-1;Q93008;O00507;O00507-2	Q93008-1;Q93008	Probable ubiquitin carboxyl-terminal hydrolase FAF-X	USP9X	Color2 [DarkGray]	1	4					16	16	16	9.3	9.3	9.3	290.46	0	158.29	585920000	132	21.5103	24.0444	24.0767	22.7475	23.8527	NaN	23.7421	22.8864	22.6903	23.9821	22.675	23.4699	23.7185	22.288	24.5739	23.5135	24.5572	23.538	24.4428	24.1984	23.5088	24.0688	23.6459	23.0025	24.6301
	2.24583	0.33213	P62873;P62873-2	P62873;P62873-2	Guanine nucleotide-binding protein G(I)/G(S)/G(T) subunit beta-1	GNB1	Color2 [DarkGray]	1	4					9	9	6	41.5	41.5	22.4	37.377	0	323.31	5977900000	383	27.8711	27.4997	26.7745	26.91	26.9324	26.6043	26.8452	27.1698	27.0084	26.9135	26.8266	27.0596	27.08	27.0693	27.385	26.547	26.8606	27.0649	26.7288	27.0393	26.6682	26.7685	27.183	26.8193	26.2114
	2.23289	0.743668	O75874	O75874	Isocitrate dehydrogenase [NADP] cytoplasmic	IDH1	Color2 [DarkGray]	1	4					14	14	13	45.9	45.9	43.7	46.659	0	323.31	2605900000	214	26.0702	25.2159	25.5862	26.3663	24.7867	26.5582	27.5233	26.8614	26.2122	25.2097	26.0084	25.8798	26.6492	27.0382	26.0678	25.4369	25.6161	26.4621	24.5714	26.8765	25.5216	24.7479	25.6932	25.1858	25.2567
	2.22994	0.321642	P12955;P12955-3;P12955-2	P12955;P12955-3;P12955-2	Xaa-Pro dipeptidase	PEPD	Color2 [DarkGray]	1	4					12	12	12	37.1	37.1	37.1	54.548	0	323.31	4134400000	303	27.0578	27.1102	26.3224	26.9919	27.0555	26.7283	27.5505	26.805	26.5774	26.1831	26.9351	26.3977	26.9107	26.8368	26.1118	26.3114	26.2429	26.5473	26.7392	25.9713	26.5631	26.7599	26.5045	26.84	26.396
	2.2274	0.472971	P30048-2;P30048	P30048-2;P30048	Thioredoxin-dependent peroxide reductase, mitochondrial	PRDX3	Color2 [DarkGray]	1	4					6	6	6	44.5	44.5	44.5	25.838	0	291.92	5012600000	248	27.8179	26.1772	27.1019	27.3266	26.4372	27.5144	27.6773	27.3525	26.7743	26.6895	27.0007	26.8099	27.2272	27.0637	27.0912	26.966	25.3192	26.8477	26.465	27.2533	26.2801	26.5274	26.7958	26.7099	26.1272
	2.17633	1.32919	P14207;P41439	P14207	Folate receptor beta	FOLR2	Color2 [DarkGray]	1	4					6	6	6	31.8	31.8	31.8	29.279	0	92.425	397550000	56	21.5082	NaN	NaN	24.2572	NaN	23.8361	24.9675	24.0578	25.5071	23.0987	24.3705	NaN	24.5456	26.455	NaN	22.5985	23.405	22.4185	23.34	22.9002	NaN	NaN	NaN	NaN	NaN
	2.13298	0.479087	Q9Y6G5	Q9Y6G5	COMM domain-containing protein 10	COMMD10	Color2 [DarkGray]	1	4					6	6	6	37.6	37.6	37.6	22.966	0	26.429	261470000	84	22.9034	22.8813	23.1749	23.1421	23.312	23.0984	23.3822	22.2877	22.7772	22.2859	23.0391	23.2593	23.1089	22.7742	21.756	21.5171	21.9716	23.5122	22.9346	22.0636	22.4952	22.9794	22.4041	23.0721	22.035
	2.11818	0.600605	Q7Z5L9;Q7Z5L9-2;Q7Z5L9-3	Q7Z5L9;Q7Z5L9-2	Interferon regulatory factor 2-binding protein 2	IRF2BP2	Color2 [DarkGray]	1	4					6	6	5	18.4	18.4	14	61.024	0	39.21	292410000	40	NaN	23.1997	23.7189	23.7082	23.6038	NaN	23.0845	NaN	23.0586	24.0949	NaN	23.4438	23.3427	23.4603	NaN	21.6943	22.899	NaN	23.149	23.0068	22.4894	23.0638	23.4196	23.2336	22.8393
	2.11646	0.605066	P10619-2;P10619	P10619-2;P10619	Lysosomal protective protein;Lysosomal protective protein 32 kDa chain;Lysosomal protective protein 20 kDa chain	CTSA	Color2 [DarkGray]	1	4					3	3	3	10.6	10.6	10.6	52.488	0	107.88	964080000	71	26.1156	NaN	NaN	25.3548	24.8924	24.5163	24.9782	25.8656	25.0437	24.6431	24.4449	24.1936	25.2443	24.6371	24.8362	24.8178	23.5892	25.1351	NaN	24.8908	23.7303	24.385	25.1259	24.9401	23.9985
	2.1073	-0.525698	P51692	P51692	Signal transducer and activator of transcription 5B	STAT5B	Color2 [DarkGray]	1	4					10	3	3	16.9	7.6	7.6	89.865	0	302.47	833210000	88	23.2226	24.0962	22.1746	24.0072	24.8158	23.4149	23.7944	23.878	23.4274	24.6549	23.9476	25.1905	23.619	23.4722	23.8934	24.8186	23.8587	24.6952	24.5341	24.1011	24.072	24.7426	24.8896	23.842	24.5299
	2.10314	0.485674	Q9BRF8;Q9BRF8-2;Q9BRF8-3	Q9BRF8;Q9BRF8-2	Serine/threonine-protein phosphatase CPPED1	CPPED1	Color2 [DarkGray]	1	4					5	5	5	25.5	25.5	25.5	35.548	0	47.163	960780000	105	25.8886	24.7007	24.3272	24.1671	25.2076	25.4122	24.1115	25.1765	24.6359	NaN	24.1813	24.7977	25.2391	24.4368	24.7686	24.0951	23.7788	24.4163	24.3862	24.4363	25.1504	24.2757	24.4785	24.79	23.9337
	2.10219	-0.83709	O60711;O60711-2	O60711;O60711-2	Leupaxin	LPXN	Color2 [DarkGray]	1	4					8	8	8	30.1	30.1	30.1	43.332	0	323.31	2305400000	192	24.1638	25.6299	26.2329	24.5692	26.0083	23.4907	23.7583	25.7531	23.5354	25.7353	24.6541	26.1146	24.3545	23.7893	25.6125	25.2612	24.4371	25.0739	26.3588	26.0862	25.55	26.7077	25.7832	25.9332	26.7641
	2.08678	-0.626578	Q6FI81;Q6FI81-3;Q6FI81-2	Q6FI81;Q6FI81-3	Anamorsin	CIAPIN1	Color2 [DarkGray]	1	4					5	5	5	25.6	25.6	25.6	33.582	0	34.654	1145000000	52	25.282	21.9972	23.8562	NaN	24.3641	23.9141	NaN	24.4933	23.9962	25.1297	24.6649	24.2418	24.46	24.0367	25.5368	25.1342	24.8565	25.0694	25.2799	24.8607	25.5696	24.7692	24.9609	25.4025	25.4811
	2.06606	0.653804	P11117;P11117-2	P11117	Lysosomal acid phosphatase	ACP2	Color2 [DarkGray]	1	4					9	9	9	23.9	23.9	23.9	48.344	0	106.78	1324100000	137	25.8603	24.209	24.3834	25.627	24.8663	25.8263	26.6684	25.0127	26.2821	24.6409	24.9349	24.9091	25.6638	25.6571	23.8793	24.7528	23.5649	25.7222	24.3742	24.2741	24.8723	24.7924	25.0699	25.1083	24.6931
	2.06029	0.906439	P53634	P53634	Dipeptidyl peptidase 1;Dipeptidyl peptidase 1 exclusion domain chain;Dipeptidyl peptidase 1 heavy chain;Dipeptidyl peptidase 1 light chain	CTSC	Color2 [DarkGray]	1	4					11	11	11	38.4	38.4	38.4	51.853	0	323.31	8736300000	359	29.5279	27.1605	26.4235	28.731	27.8569	27.9269	29.4309	28.2391	28.5896	27.1178	28.5955	27.4678	26.5676	28.1562	25.7867	27.5537	25.0454	28.1699	26.7132	27.3967	28.0308	26.4463	27.4745	27.8985	26.908
	2.04404	0.418636	P06865;P06865-2	P06865	Beta-hexosaminidase subunit alpha	HEXA	Color2 [DarkGray]	1	4					10	10	10	29.9	29.9	29.9	60.702	0	67.428	986770000	151	24.4118	23.8104	NaN	25.3992	24.5951	24.9223	24.9498	24.4694	25.7698	24.5258	25.1354	24.6422	25.0933	25.3412	24.0044	24.4082	24.7125	24.5412	24.0157	24.1222	24.9345	24.2804	24.7856	24.2531	24.3602
	1.99354	0.660021	P46108;P46108-2	P46108;P46108-2	Adapter molecule crk	CRK	Color2 [DarkGray]	1	4					5	5	5	24	24	24	33.83	0	63.924	982280000	87	25.4828	24.94	23.6968	24.6348	NaN	25.1238	25.8629	24.9571	25.6888	24.1218	25.313	24.2772	25.2398	25.7243	23.309	23.3915	24.0388	25.2894	23.9143	24.0144	23.9614	23.0283	24.8444	24.8059	25.0167
	1.98174	-0.933969	P02766	P02766	Transthyretin	TTR	Color2 [DarkGray]	1	4					9	9	9	65.3	65.3	65.3	15.887	0	254.2	7401800000	196	27.459	25.7634	25.786	26.1616	27.093	26.7804	23.0559	26.9263	27.8522	27.6796	26.7223	26.7861	27.5067	26.2888	25.8928	28.3149	27.5351	25.801	27.4157	26.5142	27.9793	27.8003	27.5787	27.3467	27.9976
	1.96738	0.469027	O60493;O60493-2;O60493-4;O60493-3	O60493;O60493-2;O60493-4	Sorting nexin-3	SNX3	Color2 [DarkGray]	1	4					7	7	6	54.9	54.9	50.6	18.762	0	59.861	2564300000	177	26.3306	25.4701	25.987	26.8503	25.347	26.171	27.3278	26.2941	26.4467	25.7194	25.9305	25.1724	25.7446	26.3987	25.898	25.4919	25.2306	26.3596	26.1564	25.6211	26.1141	25.5289	26.1434	26.0796	25.5005
	1.96109	0.386766	Q13177;O75914-2;O75914;O75914-4;O75914-3	Q13177	Serine/threonine-protein kinase PAK 2;PAK-2p27;PAK-2p34	PAK2	Color2 [DarkGray]	1	4					13	13	10	43.9	43.9	34.2	58.042	0	247.52	2231600000	307	26.3146	25.2664	25.4654	26.0137	25.7544	25.5386	25.6692	25.9575	25.5797	25.8402	25.3682	25.7294	25.9492	25.2194	25.6661	24.4444	24.7096	25.5356	24.9402	25.5207	24.4649	25.7812	25.7414	24.831	25.2526
	1.95458	0.949396	P15586-2;P15586	P15586-2;P15586	N-acetylglucosamine-6-sulfatase	GNS	Color2 [DarkGray]	1	4					6	6	6	12.6	12.6	12.6	59.988	0	31.57	622230000	54	26.6095	23.8608	23.5301	25.0333	NaN	24.5305	26.1589	23.9681	24.477	23.9747	23.7344	23.7568	24.7306	24.6008	22.0671	23.3655	NaN	24.6568	23.4815	23.6375	23.442	22.8782	22.2844	NaN	22.6684
	1.9475	-0.520214	Q96T76-9;Q96T76;Q96T76-8;Q96T76-5;Q96T76-7	Q96T76-9;Q96T76;Q96T76-8;Q96T76-5;Q96T76-7	MMS19 nucleotide excision repair protein homolog	MMS19	Color2 [DarkGray]	1	4					10	10	10	18.9	18.9	18.9	108.38	0	127.28	225850000	77	22.5985	21.6823	22.4941	22.5804	22.2985	22.4901	22.0439	21.4966	21.1281	22.3751	21.7098	23.0763	NaN	21.9288	22.4718	NaN	21.679	22.6063	22.9761	22.642	24.0689	22.9197	23.022	NaN	22.2636
	1.94702	0.616491	Q9NP72;Q9NP72-2;Q9NP72-3	Q9NP72;Q9NP72-2;Q9NP72-3	Ras-related protein Rab-18	RAB18	Color2 [DarkGray]	1	4					8	8	8	52.4	52.4	52.4	22.977	0	28.925	1154000000	123	25.3836	24.0431	24.6991	25.5341	24.7306	25.3398	25.9829	25.7308	24.8555	24.6483	24.0608	25.1603	25.1884	25.49	24.5654	23.6132	23.6278	25.7717	24.5326	24.8369	24.374	24.6916	25.216	25.2937	23.3935
	1.9197	0.51495	P17931	P17931	Galectin-3	LGALS3	Color2 [DarkGray]	1	4					5	5	5	25.2	25.2	25.2	26.152	0	154.37	8790600000	215	27.864	27.1655	27.319	28.2148	27.9852	28.3624	28.7191	29.0773	28.1018	27.3111	28.0943	27.2471	27.1427	28.2642	27.4036	27.1424	27.6464	28.4541	26.6767	27.8249	27.0322	27.1551	27.658	28.2324	26.988
	1.91542	0.346481	O95292;O95292-2	O95292;O95292-2	Vesicle-associated membrane protein-associated protein B/C	VAPB	Color2 [DarkGray]	1	4					3	3	2	17.3	17.3	12.3	27.228	0	97.914	1544900000	77	25.3945	25.0809	25.4171	25.6635	25.3956	25.4539	25.7317	25.5551	26.2026	25.1984	25.5908	24.9077	25.0332	25.5085	24.8811	24.83	24.7606	25.7813	25.5677	25.3194	25.377	25.1646	24.7443	25.515	24.775
	1.91097	-0.472568	P51114-3;P51114-2;P51114	P51114-3;P51114-2;P51114	Fragile X mental retardation syndrome-related protein 1	FXR1	Color2 [DarkGray]	1	4					4	4	4	11.4	11.4	11.4	59.919	0	323.31	782280000	53	22.9825	23.2356	24.4581	24.1769	24.259	24.2848	24.1388	23.6001	23.7597	24.5084	23.9743	24.8037	23.9195	23.6037	23.9081	24.4733	23.1985	23.214	23.8918	25.2657	24.4287	25.1553	24.0388	24.6383	24.7358
	1.90949	-0.301314	P35579;P35579-2	P35579;P35579-2	Myosin-9	MYH9	Color2 [DarkGray]	1	4					67	67	59	39.1	39.1	34.7	226.53	0	323.31	129630000000	2949	30.73	31.3986	31.4532	31.2297	31.4926	30.7695	30.5979	31.0197	31.0207	31.5143	30.9009	31.5438	30.7239	31.3935	31.6933	31.3297	31.6672	31.1284	31.39	31.4352	31.3727	31.3472	31.3422	30.7782	31.7296
	1.88706	-0.408487	P13010	P13010	X-ray repair cross-complementing protein 5	XRCC5	Color2 [DarkGray]	1	4					23	23	23	58.3	58.3	58.3	82.704	0	323.31	11148000000	585	27.4855	28.0435	28.0418	27.1132	27.449	27.8242	27.1803	27.2745	26.8388	27.8406	27.2707	27.3609	27.2135	26.8886	28.6512	27.6024	28.1932	26.8923	27.4483	27.9793	27.9978	27.9466	27.9114	26.8789	28.4026
	1.86555	-0.512113	Q92922	Q92922	SWI/SNF complex subunit SMARCC1	SMARCC1	Color2 [DarkGray]	1	4					6	2	2	8.2	4.2	4.2	122.87	0	31.049	207590000	45	22.4145	22.4865	23.1578	22.7909	22.8968	21.8549	NaN	22.3334	NaN	22.2042	21.7558	22.9779	20.955	NaN	23.0288	NaN	NaN	NaN	23.186	23.4147	22.8154	22.4232	22.6042	22.9692	23.3924
	1.86469	0.5038	P20674	P20674	Cytochrome c oxidase subunit 5A, mitochondrial	COX5A	Color2 [DarkGray]	1	4					3	3	3	40.7	40.7	40.7	16.762	0	323.31	3418800000	114	26.2265	27.1371	26.542	26.8097	25.9278	25.736	26.0139	26.116	25.4405	25.7566	26.0746	26.5181	27.2203	25.3764	25.776	24.9644	25.1985	26.1475	25.9016	26.0242	27.028	25.1519	26.1507	26.1225	25.8348
	1.85833	1.06442	Q9H3G5	Q9H3G5	Probable serine carboxypeptidase CPVL	CPVL	Color2 [DarkGray]	1	4					9	9	9	28.4	28.4	28.4	54.163	0	87.702	697770000	71	24.9891	NaN	23.2061	24.8452	NaN	23.9378	NaN	25.4707	26.3137	24.1578	25.0204	22.9835	24.9054	26.797	25.4682	23.6614	NaN	22.0066	NaN	24.9259	24.1452	NaN	24.1456	23.6838	23.7817
	1.85145	0.458912	P63172	P63172	Dynein light chain Tctex-type 1	DYNLT1	Color2 [DarkGray]	1	4					3	3	3	44.2	44.2	44.2	12.452	0	259.85	586100000	95	24.878	23.59	23.2475	24.102	23.2121	24.0557	23.9241	23.9879	23.6131	23.1544	24.0498	23.5556	23.6515	24.4473	23.4767	22.5003	22.848	23.88	23.2768	23.5272	23.2708	23.2571	23.4399	23.4641	23.3594
	1.84182	-0.295861	P11216	P11216	Glycogen phosphorylase, brain form	PYGB	Color2 [DarkGray]	1	4					17	17	13	30.1	30.1	23.5	96.695	0	264.87	2894600000	247	25.5451	25.9896	26.0832	25.7908	26.2284	25.9778	25.4792	26.0235	25.4093	25.9401	25.4761	25.716	26.0419	25.743	26.4073	26.4087	26.1675	26.514	26.5499	26.0177	26.3802	26.2643	25.8658	25.8464	26.3808
	1.82872	-0.501913	O60610-2;O60610-3;O60610	O60610-2;O60610-3;O60610	Protein diaphanous homolog 1	DIAPH1	Color2 [DarkGray]	1	4					23	23	23	29.4	29.4	29.4	138.91	0	323.31	2325900000	371	25.7472	26.1146	25.3102	25.7095	26.0016	24.2331	23.9971	25.3737	24.8114	25.7379	25.1635	26.0208	25.2712	23.9006	26.1738	25.7106	25.2016	25.4151	25.7823	25.761	25.5425	26.0776	25.7114	25.6042	26.1779
	1.82791	0.471703	Q9Y5L4	Q9Y5L4	Mitochondrial import inner membrane translocase subunit Tim13	TIMM13	Color2 [DarkGray]	1	4					4	4	4	53.7	53.7	53.7	10.5	0	236.27	1956400000	121	25.9729	26.2002	26.1157	26.4994	25.8159	25.0193	26.4101	25.5338	25.1038	25.5189	26.0638	25.4778	25.5572	25.4213	25.1401	24.7173	24.4312	26.1383	26.1195	24.5851	25.5455	25.9797	25.7049	25.9329	24.9988
	1.79603	0.636947	O15162-2;O15162	O15162-2;O15162	Phospholipid scramblase 1	PLSCR1	Color2 [DarkGray]	1	4					2	2	2	15.6	15.6	15.6	26.825	0	35.173	629590000	69	23.794	25.3411	23.4603	23.6132	23.9106	24.1077	24.5123	24.6852	24.221	23.4404	23.9935	23.7897	24.5342	NaN	NaN	23.4726	24.5374	24.2961	23.5069	23.668	25.5044	22.9452	23.0246	23.6205	22.5573
	1.76458	0.580695	P50479;P50479-2	P50479;P50479-2	PDZ and LIM domain protein 4	PDLIM4	Color2 [DarkGray]	1	4					2	2	2	7.9	7.9	7.9	35.398	0.00050403	3.5093	219720000	33	22.6357	23.1493	23.2468	22.8376	22.6212	NaN	NaN	NaN	24.0897	22.6713	22.6456	22.843	NaN	NaN	NaN	22.1765	23.0641	22.7637	22.5212	21.3462	22.9897	21.5218	NaN	22.3336	NaN
	1.75672	-0.529816	Q9BTY7	Q9BTY7	Protein HGH1 homolog	HGH1	Color2 [DarkGray]	1	4					8	8	8	37.9	37.9	37.9	42.129	0	81.868	427150000	69	NaN	23.133	23.2355	23.4768	22.3036	22.6271	23.6472	NaN	22.6113	23.4116	22.8894	23.3537	23.3857	22.4769	21.6375	24.302	23.6445	23.9931	23.7845	22.7552	23.531	23.7757	23.7639	22.8478	23.7347
	1.75659	0.602744	P07099	P07099	Epoxide hydrolase 1	EPHX1	Color2 [DarkGray]	1	4					7	7	7	21.8	21.8	21.8	52.948	0	9.2813	1221300000	70	25.5397	23.7948	24.3121	25.6241	24.7297	25.4181	NaN	26.1342	25.2291	23.8798	26.2	24.9462	24.906	25.9136	25.0068	24.9277	25.0854	25.3242	23.4438	25.4865	24.8386	25.1522	23.289	23.4608	24.5721
	1.75133	0.838403	Q15293;Q15293-2	Q15293;Q15293-2	Reticulocalbin-1	RCN1	Color2 [DarkGray]	1	4					4	4	4	19.3	19.3	19.3	38.89	0	55.015	320900000	30	22.696	NaN	NaN	NaN	NaN	23.3086	23.6134	23.1246	24.754	NaN	24.3853	23.5216	24.4146	25.1904	22.487	21.9377	NaN	24.1135	NaN	21.83	23.1075	NaN	23.0824	22.64	23.0714
	1.74862	0.514576	P51452;P51452-2	P51452;P51452-2	Dual specificity protein phosphatase 3	DUSP3	Color2 [DarkGray]	1	4					5	5	5	37.3	37.3	37.3	20.478	0	307.97	1140200000	77	24.9391	24.4099	25.3689	25.2927	24.2157	25.7688	25.8932	25.7784	25.56	23.6027	24.8451	24.4769	25.7899	24.7068	24.8374	24.1395	23.9476	25.5287	24.237	25.0848	24.2753	24.0986	24.8679	25.0744	24.7048
	1.74363	-0.525999	Q15008;Q15008-4;Q15008-3;Q15008-2	Q15008;Q15008-4;Q15008-3;Q15008-2	26S proteasome non-ATPase regulatory subunit 6	PSMD6	Color2 [DarkGray]	1	4					10	10	10	33.4	33.4	33.4	45.531	0	179.11	1340800000	162	24.8195	24.5189	25.2492	24.721	23.4221	25.3004	24.082	24.979	24.6934	24.553	23.5837	24.9213	24.4847	24.3826	24.2096	26.5986	25.6771	25.0639	25.0929	24.8186	25.074	25.337	25.3076	24.3169	25.2353
	1.73659	-0.628831	Q5T4S7-2;Q5T4S7-3;Q5T4S7-4;Q5T4S7;Q5T4S7-5	Q5T4S7-2;Q5T4S7-3;Q5T4S7-4;Q5T4S7	E3 ubiquitin-protein ligase UBR4	UBR4	Color2 [DarkGray]	1	4					28	28	28	9.3	9.3	9.3	575.95	0	140.7	969640000	189	23.3499	25.2302	24.6844	24.4583	24.8079	24.0605	NaN	24.0918	23.5268	24.8366	23.3809	24.4828	24.2362	20.9355	24.0709	24.5765	24.7176	24.9105	24.8347	25.4749	24.7018	24.5152	24.541	24.5003	24.9103
	1.73547	0.275889	P51148;P51148-2	P51148;P51148-2	Ras-related protein Rab-5C	RAB5C	Color2 [DarkGray]	1	4					6	6	4	43.1	43.1	32.9	23.482	0	323.31	5600400000	284	26.969	26.3625	27.455	27.2613	27.0695	27.3278	27.666	27.2637	26.9615	26.6939	27.1057	26.8415	27.2769	27.6066	27.0855	26.5107	26.6421	26.9905	27.2043	26.8249	26.8288	26.772	26.9957	27.4229	26.245
	1.71939	0.470113	O00264;O00264-2	O00264	Membrane-associated progesterone receptor component 1	PGRMC1	Color2 [DarkGray]	1	4					4	4	4	33.8	33.8	33.8	21.671	0	191.62	446840000	43	24.0498	NaN	24	24.5	NaN	NaN	24.9866	23.9027	24.1446	23.2317	23.9252	23.4189	23.8299	24.9694	24.2261	23.1137	NaN	24.1267	23.7128	24.1003	NaN	NaN	24.1984	23.0588	NaN
	1.71823	-0.586218	Q96I15;Q96I15-2	Q96I15;Q96I15-2	Selenocysteine lyase	SCLY	Color2 [DarkGray]	1	4					5	5	5	15.7	15.7	15.7	48.148	0	18.392	452390000	103	22.7283	23.0416	23.3823	NaN	21.0369	22.8929	NaN	23.4651	23.3696	23.3982	22.6632	23.2346	23.72	20.8712	22.8153	23.9146	23.3248	23.6243	23.8096	23.0052	23.0867	23.564	23.6943	23.9319	23.7527
	1.7103	-0.218247	Q15365	Q15365	Poly(rC)-binding protein 1	PCBP1	Color2 [DarkGray]	1	4					14	14	12	76.1	76.1	68.3	37.497	0	323.31	14532000000	553	27.9019	27.626	28.7396	28.4571	28.4729	28.0756	28.2273	27.9426	27.8936	28.335	28.03	28.5617	28.3252	27.9787	28.5053	28.4784	27.9974	28.1619	28.4204	28.5909	28.2516	28.5095	28.587	28.8167	28.7705
	1.7039	0.24659	O60749;O60749-2	O60749;O60749-2	Sorting nexin-2	SNX2	Color2 [DarkGray]	1	4					9	8	8	25.6	23.7	23.7	58.47	0	323.31	4929300000	163	27.2041	26.7944	26.8797	27.052	27.1912	26.727	27.3416	27.2593	27.0349	26.8634	26.6982	26.7071	26.7685	27.3947	27.3156	26.8792	26.0851	27.1818	27.0909	26.8093	26.4887	26.6206	27.008	26.582	26.6554
	1.69993	-0.461946	O95466-2;O95466;O95466-3	O95466-2;O95466;O95466-3	Formin-like protein 1	FMNL1	Color2 [DarkGray]	1	4					12	12	11	16	16	16	122.41	0	275.88	1997600000	252	24.5838	25.5048	25.5366	25.3301	25.7064	24.6507	23.6012	25.1557	25.2412	25.462	24.7472	25.8379	24.7157	24.5995	25.2002	27.2575	25.6674	24.9147	25.5053	25.0169	25.3877	25.3403	25.266	25.2273	25.8334
	1.69333	0.52069	P04792	P04792	Heat shock protein beta-1	HSPB1	Color2 [DarkGray]	1	4					11	11	11	70.7	70.7	70.7	22.782	0	323.31	57616000000	848	31.2874	30.1458	31.4464	30.5866	29.9083	31.2151	31.5411	30.5676	30.4008	29.84	30.7359	30.5481	29.9875	29.7719	29.4365	30.0196	29.836	30.5913	29.7951	29.2402	30.8514	29.5368	30.0335	30.0362	29.7401
	1.68958	0.38938	P38117;P38117-2	P38117;P38117-2	Electron transfer flavoprotein subunit beta	ETFB	Color2 [DarkGray]	1	4					7	7	7	29.4	29.4	29.4	27.843	0	217.85	3549800000	121	26.6518	25.952	26.6335	26.3544	25.9457	26.9419	27.1465	26.8829	26.2809	26.149	26.397	26.312	26.8758	26.9825	27.2203	25.6344	25.9929	26.7866	26.0203	26.4124	25.7066	27.0409	26.3719	26.6972	24.9875
	1.68223	1.45879	P48163;P48163-2	P48163;P48163-2	NADP-dependent malic enzyme	ME1	Color2 [DarkGray]	1	4					9	9	9	29.9	29.9	29.9	64.149	0	261.11	320270000	63	21.8474	NaN	NaN	23.1921	21.9822	23.9455	21.8632	25.2865	25.4286	20.4988	22.9836	20.9538	25.7814	24.9482	20.2989	21.8886	22.2487	21.1196	NaN	23.4669	21.0159	20.5313	NaN	NaN	22.2306
	1.66399	-0.431454	Q15046;Q15046-2	Q15046;Q15046-2	Lysine--tRNA ligase	KARS	Color2 [DarkGray]	1	4					15	15	15	29.1	29.1	29.1	68.047	0	323.31	3079000000	219	25.8793	25.4192	25.5641	26.1285	25.9193	26.2205	25.681	26.8188	23.7627	26.347	25.741	26.4508	26.3299	25.1316	26.4243	26.1383	26.3262	25.8123	26.4628	26.6393	26.0315	26.8494	26.4808	26.2013	26.3703
	1.66053	-0.436048	Q7Z406;Q7Z406-6;Q7Z406-2;Q7Z406-5;Q7Z406-4	Q7Z406;Q7Z406-6;Q7Z406-2;Q7Z406-5;Q7Z406-4	Myosin-14	MYH14	Color2 [DarkGray]	1	4					6	4	4	3.9	2.6	2.6	227.87	0	40.108	1437000000	91	24.6041	24.5795	24.871	24.9936	22.8129	24.7578	23.911	24.7624	24.8348	25.2777	24.5168	24.9172	24.6077	25.3882	25.4004	24.1768	24.8306	24.838	24.966	25.3288	24.9559	25.3478	24.5505	NaN	25.9605
	1.65028	-0.579616	P46734-2;P46734;P46734-3	P46734-2;P46734;P46734-3	Dual specificity mitogen-activated protein kinase kinase 3	MAP2K3	Color2 [DarkGray]	1	4					7	7	7	32.7	32.7	32.7	36.172	0	323.31	704970000	102	23.6575	23.3844	24.8452	22.5065	21.6468	23.7697	23.5025	23.3652	22.7362	23.7975	23.2345	24.802	NaN	23.0336	24.2639	22.639	25.0755	23.8126	24.1508	24.3626	24.1045	24.3413	23.4096	23.2474	23.8942
	1.63633	0.544673	O96000-2;O96000	O96000-2;O96000	NADH dehydrogenase [ubiquinone] 1 beta subcomplex subunit 10	NDUFB10	Color2 [DarkGray]	1	4					3	3	3	17.3	17.3	17.3	20.143	0	7.6299	275940000	39	22.9642	22.4679	24.1739	23.7545	23.0483	23.0899	23.1574	23.1423	22.6341	22.8163	22.5583	22.6807	NaN	NaN	22.8533	22.1178	22.4597	22.9437	23.0832	22.1675	23.2684	22.4987	22.4276	23.0111	20.9596
	1.63448	0.367674	Q9UNK0	Q9UNK0	Syntaxin-8	STX8	Color2 [DarkGray]	1	4					3	3	3	18.2	18.2	18.2	26.906	0	21.722	168450000	45	21.4014	23.3898	22.8117	21.7692	22.2236	22.9164	22.3464	22.1464	21.8522	21.9867	21.5253	22.2885	22.0255	21.8295	NaN	NaN	22.1525	22.0126	22.1269	21.5175	22.0334	21.8413	22.3135	22.0928	NaN
	1.63285	-0.812011	Q92835;Q92835-2;Q92835-3	Q92835;Q92835-2;Q92835-3	Phosphatidylinositol 3,4,5-trisphosphate 5-phosphatase 1	INPP5D	Color2 [DarkGray]	1	4					14	14	13	17.2	17.2	16.1	133.29	0	132.91	955030000	117	22.4488	23.7658	25.1887	21.5229	24.2336	23.4416	NaN	24.4169	23.6933	24.7617	23.6353	23.6381	24.827	22.5797	26.3348	24.4105	24.0355	NaN	25.1441	25.3034	24.6997	25.2956	24.4262	NaN	24.8856
	1.62407	-0.51797	O60884	O60884	DnaJ homolog subfamily A member 2	DNAJA2	Color2 [DarkGray]	1	4					6	6	6	32	32	32	45.745	0	215.79	975130000	147	23.9799	25.0098	24.7496	23.7607	23.8548	21.934	23.6113	24.4377	23.2465	24.7245	23.8746	24.6272	24.1713	23.684	24.3639	25.9034	25.5489	23.6371	23.7574	24.6033	25.2318	24.0961	24.7563	24.4314	24.5674
	1.6159	0.243824	P04899;P04899-6;P04899-3;P04899-5;P04899-2;P04899-4;P63096;P63096-2	P04899;P04899-6;P04899-3;P04899-5;P04899-2;P04899-4	Guanine nucleotide-binding protein G(i) subunit alpha-2	GNAI2	Color2 [DarkGray]	1	4					12	12	8	47.9	47.9	33.5	40.45	0	323.31	24626000000	852	29.3769	29.2619	28.7632	28.6191	28.7341	29.0977	28.849	29.593	29.163	29.2077	29.0729	29.1635	29.8536	29.8218	29.4637	28.6229	28.8309	29.1448	28.8978	29.1836	28.6891	29.1678	28.8986	28.8967	28.993
	1.60985	0.483546	P34059	P34059	N-acetylgalactosamine-6-sulfatase	GALNS	Color2 [DarkGray]	1	4					4	4	4	12.5	12.5	12.5	58.025	0	37.976	181450000	38	22.6678	22.3915	NaN	22.8818	22.9164	21.9324	22.2766	NaN	24.0098	22.2719	22.9418	22.3628	22.1522	23.8288	NaN	22.9069	22.5034	21.9462	NaN	NaN	22.684	NaN	22.081	NaN	22.6531
	1.59497	0.524648	P11234;P11234-2;P11234-3	P11234;P11234-2;P11234-3	Ras-related protein Ral-B	RALB	Color2 [DarkGray]	1	4					7	7	4	51.5	51.5	26.2	23.408	0	48.7	605910000	113	24.2099	23.1168	23.1885	23.6458	23.9593	24.684	23.4372	25.023	24.1132	23.2674	24.0385	24.0975	24.6865	24.7294	23.4237	22.0599	23.3288	23.6907	22.8206	23.3985	23.8503	23.9764	23.6841	23.078	23.5097
	1.56552	0.407818	O75431;O75431-2	O75431;O75431-2	Metaxin-2	MTX2	Color2 [DarkGray]	1	4					2	2	2	19	19	19	29.763	0	92.257	565050000	35	24.6937	23.7349	24.9679	24.6361	23.896	24.4718	NaN	23.5053	23.3503	23.9555	24.0068	23.534	24.0896	24.0861	24.6899	23.1852	23.1765	23.6212	NaN	24.213	NaN	24.2291	23.2153	24.1615	22.5479
	1.55308	-0.242053	P25685;P25685-2	P25685;P25685-2	DnaJ homolog subfamily B member 1	DNAJB1	Color2 [DarkGray]	1	4					6	6	5	22.9	22.9	19.4	38.044	0	97.522	665340000	170	23.6229	23.59	24.2942	23.9094	23.8257	23.6172	24.131	23.5369	23.2987	23.9466	23.4713	23.8818	24.2857	23.7589	24.2127	23.7659	23.5879	24.2137	24.1937	24.4268	23.901	23.7652	24.1669	24.1061	24.0984
	1.55168	0.191766	P84077	P84077	ADP-ribosylation factor 1	ARF1	Color2 [DarkGray]	1	4					10	10	2	74.6	74.6	19.9	20.697	0	323.31	19044000000	777	28.7113	28.7038	29.0233	28.8278	28.6452	28.5024	28.5598	28.856	28.793	28.6923	28.6238	28.2068	28.9849	28.7534	28.2442	28.404	28.3332	28.6753	28.8827	28.5307	28.108	28.6813	28.6266	29.0175	28.3094
	1.54753	-0.573672	O75792	O75792	Ribonuclease H2 subunit A	RNASEH2A	Color2 [DarkGray]	1	4					4	4	4	22.4	22.4	22.4	33.395	0	17.453	570150000	43	23.5753	23.3936	22.4179	23.9946	24.4183	23.1255	NaN	23.8154	NaN	24.1831	23.181	23.3857	23.8126	NaN	22.3259	NaN	23.3193	23.82	25.1031	23.9285	NaN	24.7512	24.4905	NaN	23.4429
	1.54106	-0.694803	Q9Y5B9	Q9Y5B9	FACT complex subunit SPT16	SUPT16H	Color2 [DarkGray]	1	4					7	7	7	12	12	12	119.91	0	115.14	558140000	70	NaN	22.4934	24.0862	NaN	NaN	23.7708	22.6352	22.3561	23.0231	23.2876	23.1801	23.9678	22.3976	23.3917	24.7987	22.5039	22.6093	NaN	NaN	25.0928	23.9098	23.5268	23.322	NaN	24.148
	1.53821	0.235079	P51149	P51149	Ras-related protein Rab-7a	RAB7A	Color2 [DarkGray]	1	4					11	11	11	60.9	60.9	60.9	23.489	0	323.31	9537400000	479	28.0765	27.3535	27.4737	27.8643	27.2563	28.0345	28.1353	28.3745	27.6534	27.4643	27.6644	27.498	27.9076	27.9681	27.7784	27.0076	27.2363	28.0671	27.6645	27.8598	27.2201	27.6619	27.6882	27.8257	27.0772
	1.5361	-0.47405	Q9BWS9-2;Q9BWS9;Q9BWS9-3	Q9BWS9-2;Q9BWS9;Q9BWS9-3	Chitinase domain-containing protein 1	CHID1	Color2 [DarkGray]	1	4					5	5	5	20.1	20.1	20.1	47.615	0	30.543	154290000	54	NaN	20.6658	20.9223	NaN	NaN	21.563	22.566	NaN	21.8119	21.4402	22.4585	22.1568	21.7868	21.9244	22.4132	23.025	22.4761	NaN	NaN	22.6744	22.4921	NaN	NaN	NaN	21.9257
	1.5344	0.363089	P16152;P16152-2	P16152;P16152-2	Carbonyl reductase [NADPH] 1	CBR1	Color2 [DarkGray]	1	4					15	15	13	69.7	69.7	59.2	30.375	0	323.31	23539000000	526	29.5159	29.3645	28.7565	29.3345	29.137	29.8796	29.9261	29.6822	28.7583	28.6495	28.6377	29.0106	30.01	29.1167	28.6077	28.4307	28.2188	30.1159	29.2142	28.9564	28.5048	29.1576	29.1525	29.3489	28.752
	1.53269	-0.508957	Q9BTT0;Q9BTT0-3;Q9BTT0-2	Q9BTT0;Q9BTT0-3	Acidic leucine-rich nuclear phosphoprotein 32 family member E	ANP32E	Color2 [DarkGray]	1	4					7	7	7	29.5	29.5	29.5	30.692	0	323.31	1988000000	216	25.462	25.9215	26.0248	24.845	24.9863	24.7259	24.5177	25.321	24.8995	25.86	24.8503	25.513	23.8349	22.9821	25.6264	26.3676	24.2372	25.1475	25.6724	25.4918	24.9684	25.4894	25.8785	26.1854	25.6515
	1.52934	-0.257805	Q7L2H7;Q7L2H7-2	Q7L2H7;Q7L2H7-2	Eukaryotic translation initiation factor 3 subunit M	EIF3M	Color2 [DarkGray]	1	4					8	8	8	33.4	33.4	33.4	42.502	0	275.5	1604600000	223	25.7367	24.7524	24.7088	25.4206	25.1017	25.1707	24.8958	24.9569	24.4734	25.2945	24.7493	25.0225	25.0136	24.866	25.0989	24.6358	25.3034	24.9555	25.4371	25.2603	25.4722	25.382	25.1917	25.8443	24.9875
	1.52212	0.834888	P15104	P15104	Glutamine synthetase	GLUL	Color2 [DarkGray]	1	4					7	7	7	29.5	29.5	29.5	42.064	0	323.31	1276000000	87	24.1219	22.8644	NaN	26.025	NaN	25.7604	27.3138	24.4691	27.7914	24.2424	25.3594	24.7234	25.0595	25.2273	NaN	24.1528	23.8578	25.3229	23.8446	25.0114	24.5608	24.397	24.6323	24.5943	23.7711
	1.51612	-0.241741	P56192;P56192-2	P56192;P56192-2	Methionine--tRNA ligase, cytoplasmic	MARS	Color2 [DarkGray]	1	4					14	14	14	27.1	27.1	27.1	101.11	0	146.86	2441800000	287	25.6061	25.5403	25.8919	25.6638	25.7083	25.8639	25.5277	25.7021	25.5209	25.9819	24.9209	26.2669	25.5575	24.7689	25.8051	25.3467	25.7521	25.6619	26.0393	25.9254	25.3757	25.888	26.0108	25.9916	25.78
	1.5161	-0.332766	O75643;O75643-2	O75643	U5 small nuclear ribonucleoprotein 200 kDa helicase	SNRNP200	Color2 [DarkGray]	1	4					40	40	40	27.1	27.1	27.1	244.5	0	323.31	3554600000	712	25.1798	26.2332	26.7457	26.1036	26.3574	25.9106	25.9042	25.7761	25.6948	26.4246	25.6823	26.5447	25.631	25.9179	26.9394	27.0076	26.8968	26.0219	25.9584	27.0514	26.2052	26.004	26.4878	25.6073	26.6375
	1.50693	-0.181241	Q14974;Q14974-2	Q14974;Q14974-2	Importin subunit beta-1	KPNB1	Color2 [DarkGray]	1	4					27	27	27	48.6	48.6	48.6	97.169	0	323.31	18658000000	1089	28.0716	29.0376	28.259	28.3551	28.625	28.5622	28.0689	28.5651	28.1005	28.5396	28.3044	28.7537	28.4814	28.1102	28.5947	28.9372	29.2004	28.3288	28.4901	28.6468	28.6058	28.6095	28.6732	28.5946	28.4173
	1.50575	-0.384909	Q9BZK7	Q9BZK7	F-box-like/WD repeat-containing protein TBL1XR1	TBL1XR1	Color2 [DarkGray]	1	4					6	6	4	22	22	13.4	55.594	0	209.91	412920000	61	23.632	23.6494	23.2781	22.8354	NaN	NaN	NaN	22.6899	23.0779	23.8492	23.0243	23.6875	22.2902	23.2959	23.7045	NaN	23.4811	23.9968	23.938	23.9327	24.3556	22.5962	23.5066	23.5637	23.9074
	1.50456	1.19065	P62942	P62942	Peptidyl-prolyl cis-trans isomerase FKBP1A	FKBP1A	Color2 [DarkGray]	1	4					2	2	2	25	25	25	11.951	0	323.31	18906000000	82	28.7471	30.1979	26.9446	29.9964	30.4466	28.3393	29.0053	29.1625	28.3647	29.4671	28.555	28.3339	28.4423	29.08	28.1376	26.6709	27.4597	29.6649	29.2526	26.6619	29.6931	29.6308	28.9638	28.7331	28.776
	1.50233	-0.447864	P22694-4;P22694-3;P22694;P22694-5;P22694-7;P22694-6;P22694-9;P22694-2;P22694-10;P22694-8	P22694-4;P22694-3;P22694;P22694-5;P22694-7;P22694-6;P22694-9;P22694-2;P22694-10;P22694-8	cAMP-dependent protein kinase catalytic subunit beta	PRKACB	Color2 [DarkGray]	1	4					6	6	2	27.8	27.8	10.7	39.379	0	52.741	508270000	70	22.7468	23.8288	24.1362	22.2451	23.7676	22.6229	22.5257	22.8153	22.3965	23.7991	22.6942	23.9488	23.3918	22.5272	23.9935	23.579	23.9442	23.4069	23.9271	23.7928	23.4321	24.4717	23.6974	23.1774	24.0444
	1.48385	-0.618118	P60866;P60866-2	P60866;P60866-2	40S ribosomal protein S20	RPS20	Color2 [DarkGray]	1	4					2	2	2	26.9	26.9	26.9	13.373	0	12.676	9015000000	110	28.3702	26.568	27.8062	28.1637	24.8163	27.0848	26.7054	27.8691	26.8301	27.2311	27.2512	26.743	28.3267	28.3572	26.0971	27.0813	27.0703	28.3567	27.6488	27.9484	27.3	27.729	27.5831	29.0349	28.9117
	1.48108	1.03827	P02747	P02747	Complement C1q subcomponent subunit C	C1QC	Color2 [DarkGray]	1	4					3	3	3	25.3	25.3	25.3	25.773	0	323.31	1150200000	35	24.5321	NaN	NaN	24.0542	NaN	24.8294	25.7885	25.3127	24.4239	23.3337	26.0813	23.511	28.2657	25.2969	24.1581	23.1811	23.2988	24.1181	NaN	24.5312	23.8146	NaN	NaN	23.5398	23.6329
	1.47689	0.473947	P54920;Q9H115-3;Q9H115-2;Q9H115	P54920	Alpha-soluble NSF attachment protein	NAPA	Color2 [DarkGray]	1	4					7	7	7	30.5	30.5	30.5	33.232	0	68.505	736240000	107	23.8929	24.2765	24.2181	24.6706	24.4266	24.5197	24.5614	25.1518	23.8179	23.7143	23.703	24.459	24.0831	24.7483	25.1318	23.6046	22.4009	24.3359	23.6339	25.1236	23.5751	23.1274	24.2889	24.2426	24.3884
	1.46652	-0.338508	Q9UBB5;Q9UBB5-3	Q9UBB5	Methyl-CpG-binding domain protein 2	MBD2	Color2 [DarkGray]	1	4					4	4	4	12.4	12.4	12.4	43.254	0	62.05	301690000	72	21.8548	22.6366	23.5664	23.213	22.8238	22.8972	22.577	22.6068	22.1169	22.8886	22.3393	23.1557	21.8175	22.2393	22.9242	23.0455	NaN	22.9884	22.8599	23.1518	23.8902	22.9901	22.8887	22.9947	22.6988
	1.44742	-0.200175	P78371;P78371-2	P78371;P78371-2	T-complex protein 1 subunit beta	CCT2	Color2 [DarkGray]	1	4					21	21	21	54.2	54.2	54.2	57.488	0	323.31	17432000000	1326	28.2601	28.7712	28.2402	28.0217	28.4603	28.2715	27.9416	28.2099	27.924	28.5114	28.2284	28.3964	28.5145	27.8689	28.2351	28.1843	28.4872	28.4114	28.5093	28.3856	28.0931	28.6985	28.4015	28.4277	28.8969
	1.44622	-1.14219	Q6ZS81;Q6ZS81-5;Q6ZS81-4;Q6ZS81-3;Q6ZS81-2	Q6ZS81;Q6ZS81-5;Q6ZS81-4	WD repeat- and FYVE domain-containing protein 4	WDFY4	Color2 [DarkGray]	1	4					26	26	26	13	13	13	353.61	0	323.31	913170000	219	21.1094	23.3798	26.2604	23.6502	24.4539	23.52	20.7136	22.4132	21.4496	24.8848	23.12	23.9569	23.3335	21.3611	25.774	21.7912	20.0993	23.0225	25.4371	25.7923	25.3637	25.5307	24.6883	24.8663	25.2139
	1.4457	3.03284	Q562R1	Q562R1	Beta-actin-like protein 2	ACTBL2	Color2 [DarkGray]	1	4					11	3	3	29.5	10.6	10.6	42.003	0.00026344	4.2592	231220000000	135	25.8203	34.745	28.6685	26.2883	27.5865	25.5976	23.9301	35.3775	24.5842	24.0407	34.7812	23.6999	35.047	35.0646	24.9708	NaN	22.5877	25.2996	23.9732	34.5523	33.0968	25.5333	22.3288	23.489	21.9935
	1.43476	0.506851	P50148	P50148	Guanine nucleotide-binding protein G(q) subunit alpha	GNAQ	Color2 [DarkGray]	1	4					6	6	4	22.8	22.8	17.3	42.142	0	112.43	922360000	87	24.2045	24.0384	24.1974	24.2127	NaN	24.7481	24.8555	23.5425	25.4616	24.6631	25.1136	25.0591	24.7158	25.7757	24.4099	25.0219	23.9818	23.5942	23.8825	23.4114	25.2892	23.7607	22.9559	23.5393	24.4237
	1.434	-0.43939	Q8IY67-2;Q8IY67;Q8IY67-3	Q8IY67-2;Q8IY67	Ribonucleoprotein PTB-binding 1	RAVER1	Color2 [DarkGray]	1	4					10	10	10	26.8	26.8	26.8	77.859	0	28.707	469220000	85	22.4234	23.4884	24.1009	23.3101	23.9546	22.8545	23.0512	22.8648	22.3221	23.1267	22.5695	23.3593	22.8254	NaN	23.8246	23.3156	22.8797	23.2111	23.9764	24.7824	23.6043	22.7784	23.7501	23.2607	23.5672
	1.43382	-0.713872	O00148;O00148-2;O00148-3	O00148;O00148-2	ATP-dependent RNA helicase DDX39A	DDX39A	Color2 [DarkGray]	1	4					17	9	9	55.7	33.7	33.7	49.129	0	44.709	432750000	67	22.6198	23.6888	23.6108	22.7965	NaN	22.5243	23.0403	23.7168	21.6143	23.1233	22.572	NaN	23.0376	NaN	23.857	21.6981	NaN	NaN	23.056	25.4808	NaN	21.2965	24.2622	24.1333	24.4846
	1.43335	0.359405	Q92542-2;Q92542	Q92542-2;Q92542	Nicastrin	NCSTN	Color2 [DarkGray]	1	4					6	6	6	13.2	13.2	13.2	76.743	0	47.876	633840000	78	24.8315	23.0536	23.677	24.0906	24.2138	24.5191	24.9593	23.8558	24.4598	23.6375	23.8986	24.1964	23.4307	24.8391	23.8038	23.5256	23.0976	24.2288	23.4909	23.7905	23.8306	23.8127	24.0892	23.5991	23.8457
	1.43331	0.506104	O15511;O15511-2	O15511;O15511-2	Actin-related protein 2/3 complex subunit 5	ARPC5	Color2 [DarkGray]	1	4					6	6	6	58.3	58.3	58.3	16.32	0	226.58	19436000000	138	29.9738	29.3673	28.6861	29.4451	29.3587	28.6567	28.765	29.3849	28.8475	28.5652	28.4015	28.5343	29.1659	28.939	28.6282	27.7754	27.5232	29.8717	29.0878	27.5227	27.2866	29.7689	29.1422	29.333	28.3495
	1.43306	0.806844	Q9UBR2	Q9UBR2	Cathepsin Z	CTSZ	Color2 [DarkGray]	1	4					3	3	3	12.5	12.5	12.5	33.868	0	245.01	5097800000	167	28.9213	26.2699	25.3916	27.8351	26.9441	26.8454	27.6157	26.8055	27.0097	26.2132	26.5963	26.3835	25.5908	26.7764	24.3266	26.0604	24.9461	28.0914	24.5513	25.4048	24.7828	24.114	26.3427	26.175	25.9927
	1.42947	0.679956	O75348;O95670-2;O95670	O75348	V-type proton ATPase subunit G 1	ATP6V1G1	Color2 [DarkGray]	1	4					5	5	5	43.2	43.2	43.2	13.757	0	282.28	2531200000	174	27.2186	25.2337	25.7699	23.8362	25.793	26.8175	26.1417	26.549	26.1229	25.5094	25.474	25.6696	26.3171	25.9556	25.2565	24.8759	24.8495	26.4702	26.0468	26.0325	25.3768	25.7952	25.9553	24.8116	25.0542
	1.42872	-0.397232	P12268	P12268	Inosine-5-monophosphate dehydrogenase 2	IMPDH2	Color2 [DarkGray]	1	4					11	11	11	27.8	27.8	27.8	55.804	0	108.48	1766200000	161	24.8439	26.0294	25.2622	25.9525	25.8726	24.5935	23.7044	25.168	24.3287	25.3668	24.6698	25.3886	25.3595	24.245	25.6246	25.0243	25.2464	25.4709	26.0589	25.2957	25.3376	25.3191	25.4809	25.062	25.7935
	1.42698	-0.881934	P05452;CON__Q2KIS7	P05452	Tetranectin	CLEC3B	Color2 [DarkGray]	1	4					3	3	3	22.3	22.3	22.3	22.537	0	30.262	370250000	34	21.0895	NaN	21.5364	21.9467	NaN	21.9969	22.4461	NaN	23.2324	23.2348	23.3257	23.3481	21.914	23.5302	22.3535	23.8852	23.7496	NaN	NaN	NaN	22.4531	22.5447	22.3498	NaN	23.7254
	1.4193	-0.476971	Q8WUX9;Q8WUX9-2	Q8WUX9	Charged multivesicular body protein 7	CHMP7	Color2 [DarkGray]	1	4					5	5	5	15.7	15.7	15.7	50.91	0	305.61	400860000	50	22.8003	23.2648	23.4068	22.6116	23.1633	NaN	23.1487	22.9942	NaN	23.0811	NaN	22.8986	23.1357	NaN	23.3708	25.4347	NaN	23.1631	23.8848	23.2919	24.8182	23.7005	22.9434	23.3047	23.8213
	1.41842	0.829618	Q99731	Q99731	C-C motif chemokine 19	CCL19	Color2 [DarkGray]	1	4					2	2	2	23.5	23.5	23.5	10.993	0	5.409	928030000	59	25.2208	24.7681	24.6293	24.2398	25.068	25.7092	25.8259	24.2717	NaN	24.773	24.4972	25.9518	22.4007	NaN	22.566	24.4289	22.0796	25.1709	24.3934	23.5406	24.2282	24.2509	24.2036	24.5111	22.8674
	1.41735	0.907668	P05413	P05413	Fatty acid-binding protein, heart	FABP3	Color2 [DarkGray]	1	4					5	5	5	35.3	35.3	35.3	14.858	0	12.743	376790000	71	26.6705	22.176	25.0729	23.6327	23.6577	23.7825	23.9088	22.6923	23.5146	NaN	23.748	22.1319	20.4837	23.294	21.7157	22.3403	22.6741	22.8451	21.4112	21.9287	23.1291	22.1204	24.1107	23.5104	23.3761
	1.41114	0.47253	O75607	O75607	Nucleoplasmin-3	NPM3	Color2 [DarkGray]	1	4					2	2	2	20.8	20.8	20.8	19.343	0	89.136	663820000	86	23.9245	24.4961	23.9088	24.6905	25.1873	24.2101	24.476	23.3748	23.6725	23.9387	24.5575	24.1774	24.4163	23.7511	22.8284	23.0838	24.6649	23.5002	24.3949	23.4805	21.8128	24.0755	23.8674	24.4246	23.8301
	1.4102	-0.201662	Q9P2J5;Q9P2J5-2;Q9P2J5-3	Q9P2J5;Q9P2J5-2	Leucine--tRNA ligase, cytoplasmic	LARS	Color2 [DarkGray]	1	4					17	17	17	20.7	20.7	20.7	134.46	0	323.31	2595500000	238	25.568	26.0434	25.6781	25.94	25.7689	25.3862	25.6254	25.5972	25.0927	25.9362	25.55	26.0007	25.6847	25.2337	26.2129	25.9568	25.9287	25.6345	25.9491	25.8743	25.8265	25.9681	25.8096	25.2532	26.0723
	1.40908	0.452417	P84090	P84090	Enhancer of rudimentary homolog	ERH	Color2 [DarkGray]	1	4					3	3	3	56.7	56.7	56.7	12.259	0	323.31	16954000000	137	29.4412	28.8067	29.7238	29.4692	28.4259	28.8093	28.3707	28.4652	28.9628	28.7785	28.4555	28.3849	28.5353	28.444	28.8548	27.5996	26.814	29.0367	28.3536	27.9018	27.6903	29.4762	28.9277	28.8425	29.0178
	1.40378	0.551624	P08631-3;P08631-2;P08631-4;P08631	P08631-3;P08631-2;P08631-4;P08631	Tyrosine-protein kinase HCK	HCK	Color2 [DarkGray]	1	4					8	6	6	23	20	20	57.241	0	132.66	244690000	53	NaN	21.8312	21.8977	23.7695	NaN	23.2618	23.2228	23.3657	23.2193	22.2158	22.8544	22.8464	24.7223	23.5092	22.6399	NaN	21.9654	23.3944	22.4044	23.5478	22.9703	22.0776	NaN	22.2617	22.4386
	1.40319	-0.420628	Q15642-2;Q15642;Q15642-5;Q15642-4;Q15642-3	Q15642-2;Q15642;Q15642-5;Q15642-4;Q15642-3	Cdc42-interacting protein 4	TRIP10	Color2 [DarkGray]	1	4					5	5	5	16	16	16	62.591	0	176.83	205590000	59	21.3326	21.0795	21.0651	21.1533	21.8161	21.971	NaN	21.748	22.4899	22.6658	22.198	22.0976	22.2951	22.2015	22.0129	23.6487	23.3148	NaN	22.3668	22.0182	22.1699	NaN	NaN	21.9153	22.6628
	1.39752	0.793114	Q96RQ9;Q96RQ9-2	Q96RQ9;Q96RQ9-2	L-amino-acid oxidase	IL4I1	Color2 [DarkGray]	1	4					12	12	12	28.9	28.9	28.9	62.88	0	323.31	4179200000	188	27.8574	26.0259	25.7654	27.0613	26.5282	28.5639	28.1626	25.9829	27.9625	26.6009	26.8089	27.0861	25.8474	26.8681	25.219	26.3909	25.2762	26.6492	23.1305	26.4478	25.1432	26.1007	26.6724	26.8018	25.2556
	1.39593	0.323451	Q96KP4;Q96KP4-2	Q96KP4;Q96KP4-2	Cytosolic non-specific dipeptidase	CNDP2	Color2 [DarkGray]	1	4					19	19	19	63.8	63.8	63.8	52.878	0	323.31	16336000000	702	28.5161	28.958	28.6402	28.4145	28.6862	29.1289	29.2413	29.1029	28.2315	28.4196	28.0012	28.1442	29.4915	28.296	27.9577	27.4326	28.1533	29.1225	28.9576	28.6585	28.0106	28.2863	28.4311	28.4236	28.2535
	1.39491	0.470791	P26447	P26447	Protein S100-A4	S100A4	Color2 [DarkGray]	1	4					4	4	4	54.5	54.5	54.5	11.728	0	26.518	16903000000	130	29.2853	26.7468	29.0034	29.7237	29.6046	28.3167	29.1383	28.9006	28.8673	28.5336	28.798	28.7213	28.4699	29.3923	28.9352	28.4071	28.259	28.7031	28.4044	27.5917	28.2082	28.7547	28.1789	29.4358	28.3827
	1.39096	0.23986	Q15907;Q15907-2	Q15907;Q15907-2	Ras-related protein Rab-11B	RAB11B	Color2 [DarkGray]	1	4					9	9	3	53.7	53.7	25.7	24.488	0	307.12	6214300000	352	27.8433	27.3894	27.0569	27.2247	26.9775	27.4409	27.1964	27.7956	27.3392	26.9967	27.1317	26.6183	27.2335	27.4439	27.1966	26.6594	27.0837	27.3359	27.2675	26.4235	27.2352	27.1321	27.0982	27.4255	26.824
	1.38948	0.595419	P28072	P28072	Proteasome subunit beta type-6	PSMB6	Color2 [DarkGray]	1	4					3	3	3	28.9	28.9	28.9	25.357	0	47.583	962520000	32	24.4161	24.4952	NaN	25.6709	25.8659	24.342	25.2231	NaN	25.8557	24.4047	24.8853	24.6825	24.2072	25.5489	NaN	24.7882	25.3263	24.1235	25.0672	22.4299	24.0186	NaN	24.8219	24.4981	24.6216
	1.37312	-0.49018	Q15291;Q15291-2	Q15291;Q15291-2	Retinoblastoma-binding protein 5	RBBP5	Color2 [DarkGray]	1	4					2	2	2	5.2	5.2	5.2	59.152	0	5.9998	71453000	41	NaN	21.0698	20.8582	18.7948	21.7428	NaN	20.793	20.6257	NaN	NaN	20.0105	21.3873	NaN	20.6886	20.5003	21.286	21.8362	NaN	NaN	21.029	21.3986	21.8133	20.7705	21.4502	21.0433
	1.3714	-0.532672	Q12765;Q12765-2;Q12765-3	Q12765;Q12765-2;Q12765-3	Secernin-1	SCRN1	Color2 [DarkGray]	1	4					4	4	4	15.2	15.2	15.2	46.382	0	50.351	743670000	135	23.3347	24.8156	23.782	22.4603	23.8503	23.4687	21.4112	22.4782	23.514	22.9641	22.3386	22.5691	23.3604	22.5661	23.3709	24.2565	24.8798	23.582	24.4049	22.5455	23.0596	23.2621	23.0925	23.9683	23.5836
	1.3686	0.415052	Q13596-2;Q13596;Q13596-3	Q13596-2;Q13596;Q13596-3	Sorting nexin-1	SNX1	Color2 [DarkGray]	1	4					9	9	8	26.3	26.3	24.1	51.812	0	323.31	1790300000	134	25.5427	25.2955	25.8687	24.8713	25.6295	25.5999	26.2801	26.2658	23.9316	25.6935	25.2219	25.2853	25.546	25.9071	26.1439	24.6978	24.3936	25.5535	24.1346	25.4063	25.3496	24.0465	24.9195	25.4569	25.6406
	1.36789	-0.274371	P36578	P36578	60S ribosomal protein L4	RPL4	Color2 [DarkGray]	1	4					10	10	10	28.6	28.6	28.6	47.697	0	115.86	14479000000	274	27.5424	28.1018	28.1641	28.1409	28.0908	28.0104	28.0105	28.5233	27.7525	28.7245	28.0261	28.5306	28.3046	28.2222	28.97	27.8853	28.0235	27.7269	28.4602	29.1715	28.4703	28.3364	28.7616	28.4745	28.3861
	1.36738	-0.420333	Q14839;Q14839-2;Q8TDI0	Q14839;Q14839-2	Chromodomain-helicase-DNA-binding protein 4	CHD4	Color2 [DarkGray]	1	4					18	18	14	17	17	13.6	218	0	84.931	926110000	164	22.5735	24.2938	24.8247	24.1059	24.5373	23.8453	23.9608	23.9985	22.4597	24.3817	23.7389	24.2524	23.7828	23.1767	24.6947	24.1049	24.7108	24.133	24.3468	25.2789	24.2717	24.4418	23.7482	23.3502	24.6353
	1.3664	1.27912	P17661	P17661	Desmin	DES	Color2 [DarkGray]	1	4					14	12	12	34	30.2	30.2	53.535	0	323.31	2415500000	151	25.8085	25.1138	28.1385	25.8404	23.0847	27.9352	25.6191	25.5914	25.9842	23.5649	27.3601	NaN	24.8154	26.7484	24.1753	26.205	26.3166	27.3529	21.8568	21.9484	25.1255	23.1205	22.375	25.6733	25.3522
	1.36608	0.300528	Q8TD55;Q8TD55-2	Q8TD55;Q8TD55-2	Pleckstrin homology domain-containing family O member 2	PLEKHO2	Color2 [DarkGray]	1	4					8	8	8	27.8	27.8	27.8	53.349	0	167.89	2984800000	134	26.0438	26.3986	25.3905	26.2707	26.1216	26.5327	26.2945	26.6943	26.679	25.6166	26.1321	25.5887	26.3507	26.6064	24.9563	25.9352	25.6751	26.7398	25.928	25.9288	25.9914	26.0354	25.598	26.1426	25.8307
	1.36152	0.44573	P51151	P51151	Ras-related protein Rab-9A	RAB9A	Color2 [DarkGray]	1	4					2	2	2	14.9	14.9	14.9	22.837	0	263.3	298500000	61	23.3415	22.6439	22.9928	23.1136	23.3589	23.8702	23.4184	22.898	23.3613	NaN	23.1165	22.7208	23.2186	23.1079	23.3659	22.0132	22.9409	23.4	23.2166	22.9289	23.0105	23.1083	22.7785	22.9238	23.1608
	1.35683	-0.333358	Q13813-3;Q13813;Q13813-2	Q13813-3;Q13813;Q13813-2	Spectrin alpha chain, non-erythrocytic 1	SPTAN1	Color2 [DarkGray]	1	4					57	57	57	33.4	33.4	33.4	282.28	0	323.31	10580000000	993	27.1425	28.2636	27.8099	27.7775	28.2814	27.6331	27.0398	27.2261	27.1647	27.982	27.2088	27.6606	27.0967	27.6306	28.4715	28.5364	28.0092	27.6434	28.2767	27.9149	27.9737	27.924	27.1472	27.4161	28.3607
	1.35475	0.490634	Q6DD88	Q6DD88	Atlastin-3	ATL3	Color2 [DarkGray]	1	4					11	11	11	38.4	38.4	38.4	60.541	0	315.49	1096500000	137	NaN	23.7389	25.159	24.2415	24.4933	25.5549	24.8043	25.0289	25.2989	24.0485	25.2657	24.0399	25.2711	25.2974	24.7814	23.6383	25.826	24.7564	23.5603	24.5415	25.0128	23.8502	24.0494	23.7225	24.5299
	1.35306	-0.308822	P17655	P17655	Calpain-2 catalytic subunit	CAPN2	Color2 [DarkGray]	1	4					16	16	3	40.7	40.7	7.6	79.994	0	323.31	2662500000	308	25.6114	25.5071	25.601	24.871	25.6872	25.9604	25.5515	25.9147	25.9881	25.498	26.1956	25.6258	25.8717	25.5193	25.2063	27.1086	26.8831	25.7263	25.1891	25.3201	26.8612	26.0593	25.6053	26.0832	25.6965
	1.34966	-0.482605	Q7Z6Z7;Q7Z6Z7-3;Q7Z6Z7-2	Q7Z6Z7;Q7Z6Z7-3;Q7Z6Z7-2	E3 ubiquitin-protein ligase HUWE1	HUWE1	Color2 [DarkGray]	1	4					41	41	40	16.3	16.3	16.1	481.89	0	323.31	2801500000	397	25.8522	26.5918	25.7825	25.8639	26.7729	25.7868	25.4464	24.9715	25.5242	25.8942	25.9787	26.657	25.0943	23.3063	24.8163	25.9927	27.0843	25.9009	26.6051	25.6865	25.5642	26.1297	26.3005	25.3361	26.3428
	1.34402	0.24101	Q9BRG1	Q9BRG1	Vacuolar protein-sorting-associated protein 25	VPS25	Color2 [DarkGray]	1	4					5	5	5	27.3	27.3	27.3	20.747	0	30.634	607440000	188	23.4433	23.4945	23.8856	23.3655	24.56	23.79	23.8731	24.1458	23.3696	23.3404	23.5343	23.8517	24.3773	23.5443	23.3178	23.8371	23.3531	23.5484	23.2438	23.2389	23.4166	23.8934	23.1558	23.841	23.2406
	1.33155	-0.240928	Q6IN85-5;Q6IN85-2;Q6IN85;Q6IN85-4	Q6IN85-5;Q6IN85-2;Q6IN85;Q6IN85-4	Serine/threonine-protein phosphatase 4 regulatory subunit 3A	SMEK1	Color2 [DarkGray]	1	4					2	2	2	6.7	6.7	6.7	62.019	0	6.0089	99508000	50	20.5197	21.0953	21.4231	21.2493	21.1107	21.2809	21.3464	NaN	20.6818	20.8592	21.2538	21.5403	NaN	NaN	20.3494	21.9833	21.2818	21.3814	20.8029	20.9205	21.3761	21.1879	21.3111	21.3386	21.2538
	1.32673	-0.237875	Q13838;Q13838-2	Q13838;Q13838-2	Spliceosome RNA helicase DDX39B	DDX39B	Color2 [DarkGray]	1	4					17	17	9	55.8	55.8	33.9	48.991	0	323.31	9209200000	453	27.0083	27.3709	28.0915	27.482	27.607	27.3799	27.7523	27.2653	27.2791	27.8792	27.2564	27.5735	27.7486	27.3563	28.0121	26.9463	27.1278	27.7093	27.793	28.2862	27.3973	27.5573	27.804	27.9098	28.1045
	1.32656	0.645243	P50225;P50226;P50225-2	P50225;P50226	Sulfotransferase 1A1;Sulfotransferase 1A2	SULT1A1;SULT1A2	Color2 [DarkGray]	1	4					6	3	3	27.5	12.5	12.5	34.165	0.00050904	3.6584	169550000	32	23.418	NaN	NaN	NaN	23.6076	22.9968	22.681	22.6889	24.3715	21.5529	NaN	21.8419	23.8636	NaN	22.5332	NaN	22.1792	NaN	21.3383	NaN	22.0019	22.1842	NaN	22.1385	22.8175
	1.31842	0.346663	P56181-2	P56181-2			Color2 [DarkGray]	1	4					2	2	2	8.2	8.2	8.2	50.983	0	19.028	109470000	28	22.9546	NaN	NaN	21.9905	NaN	NaN	22.0482	22.4026	NaN	NaN	22.32	21.9479	21.6352	22.303	22.7999	21.7068	NaN	22.7684	22.2206	21.8294	21.7532	NaN	21.5817	21.532	21.6996
	1.31815	0.597314	Q92696	Q92696	Geranylgeranyl transferase type-2 subunit alpha	RABGGTA	Color2 [DarkGray]	1	4					8	8	8	19	19	19	65.071	0	10.93	483780000	32	24.1839	22.7855	24.6372	23.5926	24.3983	24.6347	24.5956	23.5698	23.4292	24.6885	23.2823	23.553	23.5019	23.8162	25.9494	NaN	NaN	NaN	24.7931	23.8012	NaN	NaN	23.015	23.7949	24.52
	1.31669	0.238142	O00299	O00299	Chloride intracellular channel protein 1	CLIC1	Color2 [DarkGray]	1	4					12	12	12	68	68	68	26.922	0	323.31	29150000000	686	29.8941	29.1862	29.3456	29.7605	29.2605	29.8691	29.5354	29.909	29.5651	29.2552	29.4843	29.2362	29.5539	29.4521	29.1174	28.9763	28.5048	29.7778	29.4097	29.1837	29.4292	29.645	29.408	29.8254	28.9629
	1.31598	0.666928	Q99519	Q99519	Sialidase-1	NEU1	Color2 [DarkGray]	1	4					3	3	3	13.3	13.3	13.3	45.467	0	5.8317	144630000	19	23.6548	NaN	NaN	23.6349	23.487	22.6322	NaN	NaN	23.1642	21.5381	22.0931	NaN	23.1574	23.1528	21.6463	NaN	21.6273	NaN	NaN	21.2598	NaN	22.6661	NaN	23.3469	22.3601
	1.31395	-0.511025	P15170;P15170-2;P15170-3	P15170;P15170-2;P15170-3	Eukaryotic peptide chain release factor GTP-binding subunit ERF3A	GSPT1	Color2 [DarkGray]	1	4					4	4	2	16.8	16.8	10	55.755	0	16.834	144990000	33	22.7641	NaN	22.3967	NaN	NaN	NaN	NaN	21.9265	22.0392	22.4639	22.2165	20.4721	21.7911	22.6276	23.2396	NaN	22.2113	NaN	NaN	23.1953	NaN	NaN	22.6934	NaN	NaN
	1.31305	0.240051	Q13011	Q13011	Delta(3,5)-Delta(2,4)-dienoyl-CoA isomerase, mitochondrial	ECH1	Color2 [DarkGray]	1	4					8	8	8	40.5	40.5	40.5	35.816	0	323.31	5421500000	275	26.9513	26.3773	27.4006	26.8459	27.2174	27.5261	27.2636	27.3471	26.2927	26.8005	26.9899	26.8904	27.5478	27.0615	27.0386	26.3528	26.4401	27.2298	26.7933	26.4192	27.4261	27.2987	26.9086	26.7008	26.2968
	1.31145	0.303742	Q9H4A4	Q9H4A4	Aminopeptidase B	RNPEP	Color2 [DarkGray]	1	4					17	17	17	39.8	39.8	39.8	72.595	0	290.85	3307600000	230	26.2146	25.9199	26.1094	26.6775	26.5517	26.5914	26.6055	26.759	26.7761	26.3322	26.3625	26.3462	26.9149	26.4346	25.8237	25.8155	24.6153	26.8783	26.2458	25.6449	26.1703	25.998	26.4127	26.2042	26.1938
	1.31015	0.507004	Q12913;Q12913-2	Q12913;Q12913-2	Receptor-type tyrosine-protein phosphatase eta	PTPRJ	Color2 [DarkGray]	1	4					9	9	9	11.3	11.3	11.3	145.94	0	23.613	856710000	74	24.8076	23.9653	23.7103	24.1961	24.1515	24.8077	24.8396	25.1223	24.6582	23.6768	24.3489	24.1208	26	23.9895	23.3499	23.7824	22.8776	26.0868	23.7918	23.417	23.3593	24.0407	24.057	24.2033	24.1174
	1.31012	-0.641519	P09564	P09564	T-cell antigen CD7	CD7	Color2 [DarkGray]	1	4					2	2	2	9.6	9.6	9.6	25.409	0	20.936	1030900000	76	23.9368	23.962	NaN	24.2232	23.8997	21.7781	23.1823	24.896	23.223	24.5551	24.8076	25.3715	23.1752	21.98	23.466	25.066	22.5063	24.8628	25.3914	24.2723	23.635	24.3146	25.436	24.9437	24.3194
	1.30933	-0.333021	O14974-4;O14974-3;O14974;O14974-5;O14974-2	O14974-4;O14974-3;O14974;O14974-5;O14974-2	Protein phosphatase 1 regulatory subunit 12A	PPP1R12A	Color2 [DarkGray]	1	4					6	6	6	8.9	8.9	8.9	109.1	0	323.31	1551100000	86	24.945	25.6304	25.4047	24.8448	23.646	25.135	24.9544	25.6244	24.4237	25.6836	25.0988	24.8749	25.1404	25.1834	25.193	25.484	24.5612	25.0188	24.8809	25.7535	NaN	25.5698	25.2954	25.3677	25.7743
	1.30175	-0.410887	P17812;P17812-2	P17812;P17812-2	CTP synthase 1	CTPS1	Color2 [DarkGray]	1	4					6	6	6	14.6	14.6	14.6	66.69	0	143.7	402510000	108	22.7736	23.6076	22.5117	22.7152	23.4654	22.9818	22.4757	22.8531	22.1596	23.4783	22.7832	24.0379	21.7221	21.5402	22.9442	23.9586	24.5884	22.4243	22.6362	22.948	23.4653	23.3339	23.3986	23.4847	22.8479
	1.30051	-0.329788	Q9BSJ8;Q9BSJ8-2	Q9BSJ8;Q9BSJ8-2	Extended synaptotagmin-1	ESYT1	Color2 [DarkGray]	1	4					21	21	21	33.9	33.9	33.9	122.85	0	323.31	5787600000	519	25.8927	26.7628	27.4092	26.8401	27.3234	26.8521	26.4241	26.5392	26.4018	26.9107	26.8086	26.6105	25.8588	27.3682	27.6974	27.4568	27.3753	26.5189	26.7662	27.958	27.2316	27.3127	26.4522	26.6592	27.3818
	1.29622	-0.263636	P12956;P12956-2	P12956;P12956-2	X-ray repair cross-complementing protein 6	XRCC6	Color2 [DarkGray]	1	4					22	22	22	41.1	41.1	41.1	69.842	0	323.31	18159000000	963	28.3112	28.5333	28.7305	28.795	28.5835	28.1245	28.0807	28.3504	27.8887	28.8625	28.3419	28.7607	28.1195	27.956	28.937	28.4789	27.9921	28.3255	28.5109	28.8476	28.2072	28.6998	29.1177	27.7621	28.8323
	1.29422	-0.290935	Q9Y678	Q9Y678	Coatomer subunit gamma-1	COPG1	Color2 [DarkGray]	1	4					23	23	22	45.5	45.5	44.2	97.717	0	323.31	8324100000	421	26.3238	27.8868	27.6978	26.671	27.6271	27.4335	27.572	27.0236	27.5706	27.4249	27.6659	27.1383	27.4921	28.1551	27.291	27.847	28.3735	27.1511	27.2391	27.9238	28.3595	27.3917	27.2316	27.4881	27.5794
	1.29418	0.415599	P14406	P14406	Cytochrome c oxidase subunit 7A2, mitochondrial	COX7A2	Color2 [DarkGray]	1	4					3	3	3	56.6	56.6	56.6	9.3959	0	82.738	2044100000	98	26.7466	25.9465	26.4553	26.3384	24.5384	25.7934	25.8835	26.2396	25.4424	25.4878	25.3482	25.0239	25.6089	25.5188	25.9553	25.2053	24.9157	26.1727	26.33	25.8623	24.6302	25.3519	25.4966	26.5197	25.2182
	1.29321	0.704252	P48681	P48681	Nestin	NES	Color2 [DarkGray]	1	4					17	17	17	17.4	17.4	17.4	177.44	0	323.31	593040000	111	23.2961	23.6926	23.77	25.0124	25.5999	24.5127	23.1564	22.1699	24.7556	22.4907	23.796	22.4451	24.0341	26.0327	23.6218	23.5146	24.3692	24.2011	22.1054	23.2479	24.1529	22.8884	23.18	21.8069	23.1975
	1.28796	-0.284785	P55884;P55884-2	P55884;P55884-2	Eukaryotic translation initiation factor 3 subunit B	EIF3B	Color2 [DarkGray]	1	4					20	20	20	43.5	43.5	43.5	92.48	0	274.92	3348400000	277	26.3465	26.2487	26.2819	26.4237	26.9552	25.8355	26.0923	25.9609	25.5153	26.3011	25.5738	25.7277	25.6111	25.9972	26.0573	25.8172	25.0829	26.3918	26.3947	26.3478	26.6006	26.3185	26.4325	26.3063	26.626
	1.28228	0.294427	Q9NVZ3;Q9NVZ3-2;Q9NVZ3-3;Q9NVZ3-4	Q9NVZ3;Q9NVZ3-2;Q9NVZ3-3;Q9NVZ3-4	Adaptin ear-binding coat-associated protein 2	NECAP2	Color2 [DarkGray]	1	4					7	7	7	44.9	44.9	44.9	28.338	0	148.4	3494500000	191	27.1472	26.3889	26.4224	26.6055	26.3337	26.4127	26.9055	26.3455	26.2747	26.3631	26.3436	26.529	26.8599	26.4101	26.0957	26.0397	24.7222	26.6141	26.8124	26.3915	26.1773	26.5382	26.8641	26.5417	26.1526
	1.28024	-0.455539	Q15942;Q15942-2	Q15942;Q15942-2	Zyxin	ZYX	Color2 [DarkGray]	1	4					6	6	6	19.8	19.8	19.8	61.277	0	323.31	2496800000	152	25.0926	25.938	22.8959	25.521	25.2532	24.2653	24.2466	26.1376	25.3753	25.712	25.3686	25.7179	26.1214	25.6156	26.1479	25.1292	26.5005	25.2987	25.5818	25.7786	25.5811	26.0253	25.8977	25.7268	26.2765
	1.27871	-0.550728	Q5RKV6	Q5RKV6	Exosome complex component MTR3	EXOSC6	Color2 [DarkGray]	1	4					4	4	4	30.9	30.9	30.9	28.235	0	35.093	297350000	41	NaN	21.9831	23.9339	23.3092	23.6629	22.0425	NaN	NaN	NaN	22.2636	22.2749	22.9093	22.5551	NaN	22.1307	24.0338	NaN	23.3723	23.8171	23.5525	22.572	22.9657	23.5698	24.0181	23.7603
	1.27667	0.331801	Q9Y5X2	Q9Y5X2	Sorting nexin-8	SNX8	Color2 [DarkGray]	1	4					3	3	3	8.6	8.6	8.6	52.569	0	117.43	231930000	53	21.7319	22.4269	22.8503	22.0114	NaN	23.0194	23.7928	22.4242	22.4623	22.7214	22.2021	22.1968	22.4877	22.9786	22.0897	21.6628	22.4992	22.4643	22.7188	22.5878	22.0841	23.3123	21.587	21.9524	22.3249
	1.27501	-0.492412	Q9Y6Y8-2;Q9Y6Y8	Q9Y6Y8-2;Q9Y6Y8	SEC23-interacting protein	SEC23IP	Color2 [DarkGray]	1	4					10	10	10	16.5	16.5	16.5	102.19	0	12.605	388690000	56	NaN	22.2832	22.4907	22.9589	22.6334	NaN	23.4496	23.027	22.8491	23.9129	23.1798	23.0322	22.5977	23.5571	23.5382	22.7535	NaN	NaN	23.2036	23.2536	22.9655	23.2321	23.5976	23.0005	22.2573
	1.27378	0.57604	Q99538;Q99538-3;Q99538-2	Q99538;Q99538-3;Q99538-2	Legumain	LGMN	Color2 [DarkGray]	1	4					3	3	3	13.6	13.6	13.6	49.411	0	228.85	2186500000	110	26.1649	24.5615	23.5492	26.5689	25.3387	26.1568	26.6085	26.4136	26.4435	25.3097	26.3109	25.0473	27.0596	26.1697	24.3227	25.3292	26.4282	26.3791	23.9918	25.7904	25.6636	24.4268	25.0951	25.7736	25.2939
	1.26964	-0.807026	Q9BQE3	Q9BQE3	Tubulin alpha-1C chain	TUBA1C	Color2 [DarkGray]	1	4					23	2	2	67.7	9.1	9.1	49.895	0	282.6	359030000	43	NaN	NaN	23.5195	22.1528	NaN	NaN	21.1474	22.569	21.5713	23.1834	23.5427	22.548	NaN	21.736	20.6348	22.602	NaN	23.0691	22.233	24.1947	22.4204	22.1344	23.6259	23.8654	22.6243
	1.26722	0.536437	P35270	P35270	Sepiapterin reductase	SPR	Color2 [DarkGray]	1	4					5	5	5	31.4	31.4	31.4	28.048	0	144.88	822550000	111	23.8576	24.9271	23.3752	23.7976	23.5432	24.3945	25.0113	23.0422	24.3682	22.8087	24.3817	24.6762	23.9626	24.4452	22.2286	23.9164	24.7336	23.6989	23.3286	23.207	23.3817	23.5486	23.2115	23.1387	23.5664
	1.26367	0.216669	P61224;P61224-3;P61224-4;A6NIZ1;P61224-2	P61224;P61224-3;P61224-4;A6NIZ1;P61224-2	Ras-related protein Rap-1b;Ras-related protein Rap-1b-like protein	RAP1B	Color2 [DarkGray]	1	4					8	8	5	50.5	50.5	29.9	20.825	0	323.31	9953700000	494	27.4686	27.4819	27.2746	26.9412	27.1251	27.3693	27.0832	28.0228	27.7969	27.4115	27.4423	27.2775	28.0711	27.6503	27.1511	26.678	27.2817	27.5362	27.0226	27.5922	26.7956	27.3705	27.4729	27.6514	27.4389
	1.25334	-0.447722	Q9BXP5-5;Q9BXP5-4;Q9BXP5-2;Q9BXP5-3;Q9BXP5	Q9BXP5-5;Q9BXP5-4;Q9BXP5-2;Q9BXP5-3;Q9BXP5	Serrate RNA effector molecule homolog	SRRT	Color2 [DarkGray]	1	4					7	7	7	12.6	12.6	12.6	96.221	0	67.605	527920000	163	22.196	22.0745	23.99	24.1641	24.4169	23.5117	23.7425	22.8885	22.8959	24.0788	23.4924	23.7684	22.785	21.8117	24.001	22.4476	22.5051	23.9526	23.8378	24.2384	23.5989	23.6957	23.8502	23.7644	24.6988
	1.25099	-0.341971	P42331-3;P42331-6;P42331;P42331-4;P42331-2;P42331-5	P42331-3;P42331-6;P42331;P42331-4;P42331-2;P42331-5	Rho GTPase-activating protein 25	ARHGAP25	Color2 [DarkGray]	1	4					12	12	12	29.8	29.8	29.8	72.43	0	323.31	1975800000	232	25.2429	25.5827	26.3811	25.5923	25.3881	24.6077	24.9632	25.667	24.4986	25.663	24.5685	25.828	25.1822	24.3463	25.502	25.3366	25.3436	25.3999	26.2133	25.9199	24.9354	26.0771	25.6601	25.8185	26.3124
	1.25039	0.418914	P31949	P31949	Protein S100-A11;Protein S100-A11, N-terminally processed	S100A11	Color2 [DarkGray]	1	4					4	4	4	56.2	56.2	56.2	11.74	0	323.31	9109600000	298	27.5475	27.0668	26.1997	27.2834	26.6342	27.2978	27.364	27.5879	27.7846	26.5511	27.2548	26.5026	27.5696	27.4784	25.9558	28.1727	26.9591	26.6224	25.5444	26.3965	27.6822	26.1739	27.1882	26.9053	26.652
	1.24865	0.444932	P30043	P30043	Flavin reductase (NADPH)	BLVRB	Color2 [DarkGray]	1	4					6	6	6	59.7	59.7	59.7	22.119	0	323.31	6165700000	315	26.5212	26.0106	26.3844	27.0889	26.4196	28.0114	28.8077	27.294	27.5844	26.3611	27.4825	26.2293	28.2201	28.1693	26.3895	26.7305	27.3663	27.0077	26.3712	26.5443	26.8504	26.3126	26.3632	26.767	26.7743
	1.24813	-0.265151	P27708	P27708	CAD protein;Glutamine-dependent carbamoyl-phosphate synthase;Aspartate carbamoyltransferase;Dihydroorotase	CAD	Color2 [DarkGray]	1	4					29	29	29	21.3	21.3	21.3	242.98	0	323.31	3118000000	462	25.7138	26.375	26.0637	26.2214	26.7521	26.2588	25.5	25.6826	25.5935	25.9153	25.4718	26.4662	25.355	25.5329	25.6205	25.8577	26.3239	26.2532	26.2202	26.1185	25.9958	26.1869	26.3889	26.0875	26.4601
	1.24753	-0.238525	P26640;P26640-2	P26640	Valine--tRNA ligase	VARS	Color2 [DarkGray]	1	4					20	20	20	28.4	28.4	28.4	140.47	0	323.31	5656400000	398	26.5066	26.8152	27.2522	27.2597	27.3013	26.9168	26.7035	26.454	26.5413	26.9643	26.9623	27.2238	26.9311	26.3654	27.1637	26.5825	26.7079	26.6239	27.6369	27.2566	27.4802	27.3674	26.8521	26.8324	27.2862
	1.24345	0.895509	P15090;P02689	P15090	Fatty acid-binding protein, adipocyte	FABP4	Color2 [DarkGray]	1	4					5	5	5	43.2	43.2	43.2	14.719	0	247.61	804240000	75	NaN	23.3955	NaN	24.8293	23.2055	25.9592	NaN	NaN	25.8425	24.2292	NaN	24.9171	22.6148	25.4818	25.8489	23.6279	25.6623	25.0181	NaN	NaN	NaN	23.0126	NaN	NaN	23.6877
	1.24137	-0.452368	Q9P0J0;Q9P0J0-2	Q9P0J0;Q9P0J0-2	NADH dehydrogenase [ubiquinone] 1 alpha subcomplex subunit 13	NDUFA13	Color2 [DarkGray]	1	4					4	4	4	27.1	27.1	27.1	16.698	0	5.8955	1139700000	68	23.5066	22.4812	23.6168	24.0651	NaN	25.2486	24.9219	24.5455	23.9465	24.561	24.8818	24.4236	24.7469	NaN	24.6831	25.9877	25.4818	24.8746	25.2081	24.5126	24.9658	25.3121	24.6567	25.0836	23.942
	1.2412	1.14089	Q13488;Q13488-2	Q13488;Q13488-2	V-type proton ATPase 116 kDa subunit a isoform 3	TCIRG1	Color2 [DarkGray]	1	4					10	10	10	15.5	15.5	15.5	92.967	0	23.898	439580000	56	22.4966	NaN	NaN	20.7067	NaN	25.8567	25.602	24.9618	24.9494	NaN	22.8864	22.8813	24.7954	24.1777	21.9829	22.6698	NaN	23.9015	NaN	25.1283	NaN	20.5755	NaN	22.6752	21.3431
	1.23923	0.579096	P10606	P10606	Cytochrome c oxidase subunit 5B, mitochondrial	COX5B	Color2 [DarkGray]	1	4					3	3	3	33.3	33.3	33.3	13.696	0.00027108	4.839	1583400000	46	26.4583	25.687	25.9107	26.1872	24.9364	NaN	26.378	26.279	25.8037	25.3603	25.3596	24.863	25.2432	25.1461	NaN	25.0457	NaN	22.3167	26.4533	25.1423	24.6338	25.0638	25.9183	26.0749	24.7166
	1.23252	0.999307	P04275	P04275	von Willebrand factor;von Willebrand antigen 2	VWF	Color2 [DarkGray]	1	4					10	10	10	5	5	5	309.26	0	59.051	551810000	93	NaN	NaN	22.0907	23.4031	NaN	25.5143	23.9252	NaN	24.2817	22.3856	24.6735	22.9057	24.9232	26.1944	24.8751	23.394	25.0156	24.0476	NaN	21.4858	24.3606	23.42	NaN	NaN	21.441
	1.23139	0.647149	P17050	P17050	Alpha-N-acetylgalactosaminidase	NAGA	Color2 [DarkGray]	1	4					5	5	5	18.7	18.7	18.7	46.564	0	84.421	328080000	40	24.6401	NaN	NaN	23.9326	24.0547	23.2751	NaN	NaN	24.6248	23.3554	22.8552	23.5476	23.4085	23.2924	NaN	NaN	22.4219	NaN	23.3215	21.9495	25.0179	NaN	23.0741	23.1013	23.6288
	1.22984	-0.458626	Q9P253	Q9P253	Vacuolar protein sorting-associated protein 18 homolog	VPS18	Color2 [DarkGray]	1	4					8	8	8	12.2	12.2	12.2	110.18	0	51.28	305620000	72	22.0379	23.1296	23.0307	20.327	21.8768	NaN	22.4986	NaN	22.5336	23.0556	22.9916	23.3112	23.0961	22.9868	23.1831	22.749	23.3343	22.0388	23.2378	23.9729	23.5306	22.7282	22.3978	NaN	23.2548
	1.2244	-0.433238	Q9BRR9-4;Q9BRR9-3;Q9BRR9-5;Q9BRR9-2;Q9BRR9	Q9BRR9-4;Q9BRR9-3;Q9BRR9-5;Q9BRR9-2;Q9BRR9	Rho GTPase-activating protein 9	ARHGAP9	Color2 [DarkGray]	1	4					5	5	4	16.8	16.8	15.2	61.182	0	53.842	486020000	66	22.8502	NaN	24.0095	23.7903	NaN	22.5598	23.1122	23.5162	22.9183	23.6121	22.4036	23.7472	23.2932	22.99	24.8766	24.0095	NaN	23.714	24.4024	23.7895	23.9476	24.3625	23.5534	23.9999	24.444
	1.21789	0.29592	Q9NR31;Q9NR31-2	Q9NR31;Q9NR31-2	GTP-binding protein SAR1a	SAR1A	Color2 [DarkGray]	1	4					5	5	4	36.9	36.9	31.3	22.367	0	323.31	1922600000	158	24.997	24.9604	25.4304	25.7508	24.8462	25.8216	25.9958	25.6782	26.0529	25.6653	25.2259	24.9228	25.5998	25.8411	26.0322	25.0039	25.5358	24.9708	25.0349	24.7889	25.8343	25.0239	25.2634	25.1533	25.0293
	1.21678	0.357539	Q8WZA0;Q8WZA0-2	Q8WZA0;Q8WZA0-2	Protein LZIC	LZIC	Color2 [DarkGray]	1	4					3	3	3	21.6	21.6	21.6	21.494	0	11.26	307850000	53	23.6069	NaN	22.3868	23.2052	23.4516	23.4073	23.171	23.106	22.5944	22.5681	22.2184	22.5475	22.7199	23.8113	23.4955	21.6522	22.8992	23.5823	22.6978	22.1847	21.9858	23.675	23.1263	23.1421	22.2126
	1.21547	-0.561483	Q14141-2;Q14141-4;Q14141;Q14141-3	Q14141-2;Q14141-4;Q14141;Q14141-3	Septin-6	SEPT6	Color2 [DarkGray]	1	4					8	8	5	32.6	32.6	23.9	48.872	0	323.31	4032400000	159	26.6127	27.0036	27.0703	26.0526	26.752	24.4007	24.8576	26.5905	23.6139	26.9508	25.755	26.9119	26.0151	25.1221	27.0802	25.2655	26.1695	26.1461	27.208	26.3322	26.5586	27.0069	26.5123	26.8321	27.1735
	1.21464	-0.307111	Q13126-4;Q13126;Q13126-3;Q13126-2;Q13126-7;Q13126-6;Q13126-5	Q13126-4;Q13126;Q13126-3;Q13126-2;Q13126-7;Q13126-6;Q13126-5	S-methyl-5-thioadenosine phosphorylase	MTAP	Color2 [DarkGray]	1	4					5	5	5	33.6	33.6	33.6	30.837	0	266.47	2162200000	159	25.2866	26.1355	25.9055	25.4618	25.561	24.9352	24.9332	25.6312	23.8114	25.5012	24.8375	25.5151	25.6681	24.4601	25.3324	26.263	25.8509	25.5577	25.6534	24.8901	25.3005	26.1703	25.6252	25.9169	25.6586
	1.21257	-0.381904	Q9Y263	Q9Y263	Phospholipase A-2-activating protein	PLAA	Color2 [DarkGray]	1	4					11	11	11	24.8	24.8	24.8	87.156	0	91.208	305210000	63	22.627	NaN	22.8218	22.2386	23.4406	22.4741	23.2232	23.173	22.7457	23.0385	23.0552	23.5526	22.5306	NaN	22.9765	22.4593	22.7383	23.2874	NaN	23.9701	24.298	NaN	23.1039	NaN	23.1308
	1.2084	-0.202465	O60763;O60763-2	O60763;O60763-2	General vesicular transport factor p115	USO1	Color2 [DarkGray]	1	4					15	15	15	27.3	27.3	27.3	107.89	0	323.31	2734300000	310	26.0255	25.4371	25.9686	25.8388	25.9461	25.6638	26.387	25.9022	25.8769	25.9709	25.8443	26.3046	25.4263	25.5299	25.7885	26.1301	25.4843	26.456	26.0843	26.4719	26.2602	26.1773	26.6359	25.5533	25.9836
	1.20599	-0.360693	Q7KZ85;Q7KZ85-2	Q7KZ85	Transcription elongation factor SPT6	SUPT6H	Color2 [DarkGray]	1	4					5	5	5	3.4	3.4	3.4	199.07	0	10.801	162050000	43	21.5218	NaN	22.8591	22.3606	NaN	21.702	22.3386	NaN	20.8883	22.0646	22.3622	22.3638	21.8004	21.5156	21.8396	22.5177	21.2266	22.5288	22.0304	22.1863	22.2127	22.352	NaN	NaN	22.6336
	1.20451	0.302957	Q8NB37;Q8NB37-3;Q8NB37-2;Q8NB37-4	Q8NB37;Q8NB37-3;Q8NB37-2	Parkinson disease 7 domain-containing protein 1	PDDC1	Color2 [DarkGray]	1	4					5	5	5	39.1	39.1	39.1	23.297	0	42.903	679110000	74	24.5565	24.6808	24.2078	24.8239	24.2358	23.8978	24.4409	23.4947	24.0959	24.0281	23.5789	23.9276	24.2101	23.8034	23.7975	23.0304	23.5489	24.9684	24.0441	23.7728	23.9608	24.6657	23.9377	24.2431	23.9209
	1.20441	0.496186	O43805	O43805	Sjoegren syndrome nuclear autoantigen 1	SSNA1	Color2 [DarkGray]	1	4					3	3	3	33.6	33.6	33.6	13.596	0	53.186	307380000	50	23.1649	24.4753	22.7016	23.5049	23.2356	22.6779	23.0386	22.6072	23.3357	23.3469	22.6145	23.1561	21.8638	NaN	21.3765	21.2892	21.2754	24.3171	23.0812	21.9193	22.8625	23.3221	22.6558	22.7268	22.7643
	1.20256	-0.527444	O00232;O00232-2	O00232;O00232-2	26S proteasome non-ATPase regulatory subunit 12	PSMD12	Color2 [DarkGray]	1	4					13	13	13	43.2	43.2	43.2	52.904	0	323.31	1916200000	165	24.3527	25.3519	25.2816	24.7425	25.5206	25.0154	24.301	24.7528	24.3378	24.212	24.2565	23.8076	24.6898	23.2306	24.1058	27.5107	26.568	24.3888	24.408	25.4018	25.6644	25.9269	24.6307	24.542	25.2302
	1.20089	-0.433586	Q92878-3;Q92878;Q92878-2	Q92878-3;Q92878;Q92878-2	DNA repair protein RAD50	RAD50	Color2 [DarkGray]	1	4					4	4	4	4.6	4.6	4.6	138.43	0	323.31	349470000	79	21.206	23.2706	23.5573	22.3163	23.1346	22.7329	22.2358	21.9725	NaN	22.8699	22.711	22.8479	22.1911	22.8094	23.1312	23.9252	23.2018	21.1158	22.935	23.1505	23.7298	22.6718	23.0647	NaN	23.9167
	1.20015	0.453069	O94819	O94819	Kelch repeat and BTB domain-containing protein 11	KBTBD11	Color2 [DarkGray]	1	4					6	6	6	15.6	15.6	15.6	65.719	0	14.545	148840000	35	22.5854	23.0295	22.057	23.7099	23.238	22.6497	NaN	21.9041	22.1485	21.657	NaN	21.9689	NaN	NaN	21.3042	NaN	21.6617	22.5775	22.1735	21.141	21.7337	NaN	21.1079	22.5289	NaN
	1.19984	0.151433	P29401;P29401-2	P29401;P29401-2	Transketolase	TKT	Color2 [DarkGray]	1	4					18	18	18	50.7	50.7	50.7	67.877	0	323.31	33647000000	876	29.4571	29.2689	28.9901	29.4775	29.3016	29.6067	29.3337	29.6605	29.7817	29.2499	29.2842	29.826	29.7739	29.7532	29.7063	29.2549	29.1454	29.7137	29.251	29.5451	29.214	29.0357	29.6037	29.0659	29.3895
	1.19151	0.277303	O43681	O43681	ATPase ASNA1	ASNA1	Color2 [DarkGray]	1	4					8	8	8	37.6	37.6	37.6	38.792	0	219.04	3827400000	140	26.6799	26.674	26.8567	26.3577	26.7492	26.7248	26.9269	26.706	26.3736	26.5285	26.4966	26.7421	26.9408	26.2922	26.6174	25.5272	25.7331	25.7877	26.7182	26.5058	26.3101	26.6771	27.0214	26.6606	26.6655
	1.19115	0.576024	Q8NI60;Q8NI60-3;Q8NI60-2;Q8NI60-4	Q8NI60;Q8NI60-3	Atypical kinase ADCK3, mitochondrial	ADCK3	Color2 [DarkGray]	1	4					7	7	7	15.5	15.5	15.5	71.949	0	12.133	234630000	47	23.2912	22.9636	23.8505	22.7559	23.0986	NaN	23.8773	NaN	23.8238	23.5688	22.0432	22.155	NaN	NaN	22.8557	NaN	NaN	NaN	23.2555	22.9056	22.1758	NaN	NaN	22.9913	21.6701
	1.18776	-0.60314	Q13315	Q13315	Serine-protein kinase ATM	ATM	Color2 [DarkGray]	1	4					14	14	14	6.4	6.4	6.4	350.68	0	78.875	318580000	68	21.6062	23.6385	23.1778	NaN	22.4391	21.9835	21.5476	22.0237	21.0021	22.1914	22.1597	23.1372	NaN	21.594	23.8302	23.9686	24.442	NaN	22.1682	24.5122	22.0584	22.5919	22.307	NaN	23.7214
	1.18443	0.484797	Q7Z422-5;Q7Z422;Q7Z422-2;Q7Z422-4;Q7Z422-3	Q7Z422-5;Q7Z422;Q7Z422-2;Q7Z422-4;Q7Z422-3	SUZ domain-containing protein 1	SZRD1	Color2 [DarkGray]	1	4					2	2	2	27.2	27.2	27.2	16.91	0	7.8031	115580000	24	22.2578	23.5367	21.4729	22.3046	22.19	21.692	NaN	21.3892	21.8975	NaN	21.7205	NaN	22.0868	21.5343	20.7893	20.6865	NaN	22.3981	NaN	21.2825	21.5058	21.9398	21.4025	21.9194	20.9888
	1.18406	0.633233	O00244	O00244	Copper transport protein ATOX1	ATOX1	Color2 [DarkGray]	1	4					3	3	3	48.5	48.5	48.5	7.4016	0	7.4396	1808800000	89	27.3488	26.2096	25.5968	26.2123	26.0217	25.6959	26.0112	25.4384	24.742	25.2335	24.8187	25.0191	25.2479	24.8398	24.0062	23.2931	23.6337	26.8367	26.4521	24.7381	24.6434	24.1523	26.5355	24.9167	24.7019
	1.18288	-0.29103	P62333	P62333	26S protease regulatory subunit 10B	PSMC6	Color2 [DarkGray]	1	4					10	10	10	39.8	39.8	39.8	44.172	0	323.31	4820900000	308	26.1563	27.3632	26.6043	26.9487	27.2443	26.2913	26.1046	26.7104	25.7532	26.6551	25.9846	26.823	26.4279	25.7681	26.2018	26.6175	26.7539	26.7415	26.7613	26.5671	26.4551	26.9054	26.4945	26.3926	27.03
	1.18113	-0.231422	P49588;P49588-2	P49588;P49588-2	Alanine--tRNA ligase, cytoplasmic	AARS	Color2 [DarkGray]	1	4					24	24	24	44.7	44.7	44.7	106.81	0	323.31	3684400000	483	26.6374	26.4381	25.8297	26.1086	25.9161	26.3985	26.1821	26.1413	26.0281	26.6382	26.21	26.231	26.6023	26.0536	26.3314	26.8348	26.1554	26.0963	26.0024	26.2294	26.6671	26.6608	26.4723	25.1908	26.6614
	1.17774	0.516271	A6NGU5;P19440;P36268-2;P36268;P36268-3;P19440-2;Q14390;P19440-3;B5MD39	A6NGU5;P19440;P36268-2;P36268;P36268-3;P19440-2	Putative gamma-glutamyltranspeptidase 3;Putative gamma-glutamyltranspeptidase 3 heavy chain;Putative gamma-glutamyltranspeptidase 3 light chain;Gamma-glutamyltranspeptidase 1;Gamma-glutamyltranspeptidase 1 heavy chain;Gamma-glutamyltranspeptidase 1 light chain;Inactive gamma-glutamyltranspeptidase 2	GGT3P;GGT1;GGT2	Color2 [DarkGray]	1	4					4	4	4	8.3	8.3	8.3	61.501	0	15.238	317790000	48	23.568	23.7174	23.1172	24.278	23.8131	23.4151	23.4385	22.4548	22.6042	23.1569	NaN	24.3135	21.688	NaN	NaN	22.6311	NaN	22.5769	23.929	22.3776	22.513	23.9608	23.598	22.7101	23.036
	1.17765	-0.26393	O00139-2;O00139-1;O00139-5;O00139;O00139-4	O00139-2;O00139-1;O00139-5;O00139;O00139-4	Kinesin-like protein KIF2A	KIF2A	Color2 [DarkGray]	1	4					6	6	6	16.2	16.2	16.2	75.042	0	31.549	183580000	66	NaN	22.0268	22.8354	23.0968	NaN	22.3998	22.3339	22.0012	NaN	22.7067	22.0066	NaN	21.9315	NaN	22.9827	NaN	NaN	22.1773	22.5077	23.0059	NaN	22.8726	22.55	22.4842	22.8124
	1.17608	-0.381068	Q9NXF1-2;Q9NXF1	Q9NXF1-2;Q9NXF1	Testis-expressed sequence 10 protein	TEX10	Color2 [DarkGray]	1	4					9	9	9	15.1	15.1	15.1	103.91	0	15.922	232260000	59	NaN	23.4284	22.3505	22.1925	22.7211	21.9219	22.3741	NaN	21.57	22.335	21.7059	22.1171	21.7563	22.0882	22.4303	24.0156	23.1408	22.7142	22.7838	22.6783	22.4984	NaN	22.4823	NaN	23.3031
	1.17076	0.482817	Q6XQN6;Q6XQN6-3;Q6XQN6-2	Q6XQN6;Q6XQN6-3;Q6XQN6-2	Nicotinate phosphoribosyltransferase	NAPRT	Color2 [DarkGray]	1	4					18	18	18	57.4	57.4	57.4	57.578	0	323.31	5056800000	494	26.6544	26.795	26.2326	26.5457	26.9478	27.4829	27.8959	27.0819	27.4183	26.8067	27.1707	26.8816	27.3393	26.961	26.4317	27.233	26.0384	27.5963	23.9604	25.5371	25.9089	27.3206	25.8141	26.2466	27.0305
	1.16925	0.27191	P20839-2;P20839-4;P20839;P20839-3;P20839-7;P20839-5;P20839-6	P20839-2;P20839-4;P20839;P20839-3;P20839-7;P20839-5;P20839-6	Inosine-5-monophosphate dehydrogenase 1	IMPDH1	Color2 [DarkGray]	1	4					5	5	5	19.8	19.8	19.8	52.597	0	9.1956	168700000	30	22.7662	23.1068	NaN	NaN	NaN	22.5572	NaN	22.5823	22.275	21.7541	22.4608	22.6286	22.5251	NaN	NaN	22.5095	22.298	22.4776	NaN	21.8845	22.0902	21.6241	22.2507	22.3402	22.248
	1.16757	-0.75563	O00203-3;O00203;Q13367;Q13367-4	O00203-3;O00203	AP-3 complex subunit beta-1	AP3B1	Color2 [DarkGray]	1	4					7	7	7	9.9	9.9	9.9	116.19	0	67.795	188340000	51	NaN	19.3916	22.5933	22.4715	23.3299	NaN	NaN	22.0706	21.1396	22.3246	20.2884	NaN	NaN	22.468	22.2825	23.8084	21.5986	22.0661	21.1935	23.987	22.3362	NaN	NaN	NaN	22.7312
	1.16622	-0.260197	Q9BXS5;Q9BXS5-2	Q9BXS5;Q9BXS5-2	AP-1 complex subunit mu-1	AP1M1	Color2 [DarkGray]	1	4					7	7	6	26.5	26.5	24.1	48.586	0	11.506	336020000	96	21.5068	22.8449	22.9484	23.0523	23.6752	22.6632	22.6706	22.8446	22.7843	23.1111	22.5912	23.2169	22.7922	22.4573	23.3433	22.4111	22.7216	23.2385	23.3761	23.4285	23.397	23.0054	22.7096	22.9055	23.0471
	1.16619	-0.475827	Q9BV20-2;Q9BV20	Q9BV20-2;Q9BV20	Methylthioribose-1-phosphate isomerase	MRI1	Color2 [DarkGray]	1	4					4	4	4	28	28	28	34.529	0	42.451	607830000	52	24.1911	24.8224	24.2549	23.717	23.7359	23.3834	NaN	23.2567	23.046	24.396	23.7249	23.0384	22.7063	21.9333	22.0757	NaN	24.4361	23.3671	24.3012	23.2085	24.7842	24.2313	23.8327	24.3982	24.129
	1.16438	0.269286	P20339-2;P20339	P20339-2;P20339	Ras-related protein Rab-5A	RAB5A	Color2 [DarkGray]	1	4					6	4	4	46.3	35.3	35.3	22.178	0	280.99	501950000	134	23.1902	22.7658	23.2522	23.4529	NaN	23.9729	24.2836	22.8689	23.7304	23.3834	23.6136	23.1946	24.0459	23.9255	23.097	23.0333	22.6415	23.0319	23.6239	23.5642	23.5587	22.9275	22.9467	22.6763	23.0608
	1.16122	0.475422	P39060-2;P39060-1;P39060	P39060-2;P39060-1;P39060	Collagen alpha-1(XVIII) chain;Endostatin	COL18A1	Color2 [DarkGray]	1	4					9	9	9	12.9	12.9	12.9	135.76	0	311.76	2184900000	162	25.3216	25.269	25.5303	26.0321	24.876	26.6579	26.1013	25.4905	26.8623	25.0188	26.1737	25.2036	25.6052	26.5148	25.7615	26.5575	26.2209	25.7603	25.0615	25.5905	25.6406	24.1092	24.5659	25.3712	25.1942
	1.16106	0.452572	P61018;P61018-2	P61018;P61018-2	Ras-related protein Rab-4B	RAB4B	Color2 [DarkGray]	1	4					5	3	3	33.8	23	23	23.586	0	141.22	643700000	117	23.5866	24.5195	24.2283	23.9721	23.9312	23.1309	24.2267	24.7646	23.3095	23.804	23.364	23.4738	24.5865	23.457	24.1379	23.6909	21.0284	24.0097	24.2144	23.0173	23.8746	23.688	24.1076	24.003	23.6382
	1.1581	0.488768	P61225	P61225	Ras-related protein Rap-2b	RAP2B	Color2 [DarkGray]	1	4					6	6	4	48.1	48.1	28.4	20.504	0	124.84	1464000000	94	24.8542	25.8274	23.9022	24.765	24.8105	25.2052	25.273	25.7401	24.9422	23.7497	24.8857	23.6993	26.5201	25.2453	23.9949	26.0047	26.5872	24.7591	24.0227	24.1295	24.6131	23.7392	24.0494	24.6491	24.1877
	1.15514	0.786781	O00584;O00584-2	O00584;O00584-2	Ribonuclease T2	RNASET2	Color2 [DarkGray]	1	4					4	4	4	18.4	18.4	18.4	29.48	0	30.285	886220000	55	25.3637	26.6858	24.8411	24.4083	24.4881	23.9962	24.839	24.1841	24.4447	23.3106	23.9996	23.7902	24.8436	24.2536	NaN	21.5666	23.1563	25.4016	24.7535	23.1049	23.479	23.7068	24.1452	24.7366	24.094
	1.15257	0.452137	Q5T1M5;Q5T1M5-2;Q5T1M5-3	Q5T1M5;Q5T1M5-2;Q5T1M5-3	FK506-binding protein 15	FKBP15	Color2 [DarkGray]	1	4					9	9	9	15.7	15.7	15.7	133.63	0	35.136	349310000	83	23.0946	NaN	23.3298	NaN	NaN	24.0355	23.4691	23.7706	23.4975	22.9679	23.2535	22.394	24.3116	23.8997	23.6108	NaN	NaN	23.94	NaN	24.8732	23.7719	23.3176	23.1162	22.7107	22.8625
	1.14909	0.543876	Q9Y6C2;Q9Y6C2-2	Q9Y6C2	EMILIN-1	EMILIN1	Color2 [DarkGray]	1	4					14	14	14	21.8	21.8	21.8	106.69	0	323.31	12553000000	347	28.5325	26.9512	27.6516	27.4486	27.6564	28.9498	28.6214	27.8529	29.3048	28.5442	29.3138	28.1575	28.7111	28.9044	27.6485	28.8449	27.9808	28.0373	28.0161	28.2123	28.509	28.0129	27.8038	27.1043	27.5774
	1.14621	0.356389	Q9H5X1-2;Q9H5X1	Q9H5X1-2;Q9H5X1	MIP18 family protein FAM96A	FAM96A	Color2 [DarkGray]	1	4					2	2	2	22.5	22.5	22.5	11.634	0	5.9228	335390000	74	22.9328	23.7003	23.2329	23.5105	23.5297	23.1196	23.5954	22.9732	22.9998	22.8307	23.3019	22.7733	22.8626	22.6734	21.9116	22.1152	22.7919	23.6936	23.402	22.867	22.7643	22.7474	23.2268	23.3079	22.7803
	1.14437	0.302983	P60660-2;P60660	P60660-2;P60660	Myosin light polypeptide 6	MYL6	Color2 [DarkGray]	1	4					9	9	7	67.5	67.5	51.7	16.961	0	323.31	39835000000	636	30.6296	29.8808	28.616	29.9475	29.5862	29.1397	29.6416	29.8642	30.1552	29.7355	29.6183	30.0355	29.0963	29.9076	29.6737	29.2292	28.236	30.1339	29.5782	28.6302	29.3812	29.0111	29.9316	29.5631	29.5774
	1.14405	0.416414	P49795	P49795	Regulator of G-protein signaling 19	RGS19	Color2 [DarkGray]	1	4					3	3	3	20.7	20.7	20.7	24.635	0	39.767	276240000	55	23.0948	23.5951	23.7565	23.5154	22.9002	NaN	22.6364	22.9202	22.6717	22.9383	22.6576	22.1959	23.5731	22.2663	22.9185	21.7745	21.6634	23.0382	23.6092	22.632	20.7099	22.9317	22.9248	23.3476	22.7541
	1.13378	-0.416607	P33241;P33241-3;P33241-2	P33241;P33241-3;P33241-2	Lymphocyte-specific protein 1	LSP1	Color2 [DarkGray]	1	4					10	10	10	59.6	59.6	59.6	37.191	0	323.31	8588300000	255	28.4058	27.7284	27.0386	27.6772	28.2687	25.8464	26.1224	27.6693	26.2068	27.9219	27.3315	28.2553	26.6346	26.7556	27.3714	27.1221	26.8427	27.5777	28.1419	26.8574	28.0214	28.1979	28.3247	27.6787	27.6947
	1.13222	0.299097	Q15057	Q15057	Arf-GAP with coiled-coil, ANK repeat and PH domain-containing protein 2	ACAP2	Color2 [DarkGray]	1	4					6	6	6	13	13	13	88.028	0	71.639	180410000	42	22.4131	22.7583	NaN	22.9188	23.547	22.8603	NaN	NaN	22.5066	22.475	22.5124	22.2738	NaN	NaN	22.9181	NaN	NaN	NaN	22.9539	22.0619	22.4748	22.3392	21.5872	NaN	22.723
	1.13201	-0.457102	Q92556;Q92556-2;Q92556-3	Q92556	Engulfment and cell motility protein 1	ELMO1	Color2 [DarkGray]	1	4					8	8	7	16.2	16.2	15.3	83.829	0	85.38	1179300000	146	23.6483	25.8004	25.3942	24.5207	25.1811	24.1174	23.8718	24.4871	23.0725	24.9357	23.5497	25.1281	24.351	22.0105	24.3844	23.9627	24.1113	24.5035	25.5437	24.7773	24.4558	24.9244	25.0341	24.7666	25.3714
	1.12983	-0.673885	Q9UHJ6	Q9UHJ6	Sedoheptulokinase	SHPK	Color2 [DarkGray]	1	4					6	6	6	23.4	23.4	23.4	51.49	0	75.661	377690000	49	23.9625	20.5916	23.3735	23.8003	24.7327	20.8382	23.162	NaN	NaN	20.8711	22.7846	23.3377	23.0631	NaN	NaN	22.3559	22.904	24.758	23.8661	23.1059	NaN	23.5948	23.5163	23.2306	22.6152
	1.12936	0.534877	Q6ZUJ8;Q6ZUJ8-2;Q6ZUJ8-3	Q6ZUJ8;Q6ZUJ8-2;Q6ZUJ8-3	Phosphoinositide 3-kinase adapter protein 1	PIK3AP1	Color2 [DarkGray]	1	4					6	6	6	12.7	12.7	12.7	90.397	0	135.91	383180000	44	21.9224	24.098	24.0133	23.993	24.1765	24.1226	24.0392	23.9869	23.832	NaN	NaN	NaN	25.0492	NaN	24.2782	NaN	NaN	NaN	24.4393	23.3789	22.4133	23.575	22.591	24.2173	22.7773
	1.12876	-0.286465	Q8IZL8	Q8IZL8	Proline-, glutamic acid- and leucine-rich protein 1	PELP1	Color2 [DarkGray]	1	4					9	9	9	12.3	12.3	12.3	119.7	0	244.92	1533600000	202	24.3604	25.2746	25.0511	24.7683	26.0569	24.6269	23.9852	24.5411	24.9454	24.9337	24.7904	25.1958	24.4653	24.5442	24.7033	24.8758	25.5966	25.6824	25.3589	24.8175	24.674	25.142	24.9518	25.14	25.9241
	1.12768	-0.15264	P07384	P07384	Calpain-1 catalytic subunit	CAPN1	Color2 [DarkGray]	1	4					28	28	28	54.9	54.9	54.9	81.889	0	323.31	9289100000	745	27.4591	27.507	27.9688	27.3599	27.4727	27.5587	27.4017	28.0216	27.3444	27.6511	27.4044	27.7014	27.7829	27.1278	27.7178	27.4092	27.4709	27.8141	27.7981	27.8007	27.4241	27.9834	27.8131	27.7599	27.773
	1.12743	0.354576	Q15746-9;Q15746-11;Q15746-7;Q15746-2;Q15746-6;Q15746;Q15746-4;Q15746-5;Q15746-3	Q15746-9;Q15746-11;Q15746-7;Q15746-2;Q15746-6;Q15746;Q15746-4;Q15746-5;Q15746-3	Myosin light chain kinase, smooth muscle;Myosin light chain kinase, smooth muscle, deglutamylated form	MYLK	Color2 [DarkGray]	1	4					10	10	8	16.9	16.9	13.6	80.409	0	25.96	681440000	95	23.5837	23.4076	24.0479	23.6266	24.0002	24.4243	23.9794	24.3418	24.2816	23.7835	24.2277	24.0069	24.3176	24.5452	24.5711	23.217	23.4302	24.5397	23.8458	23.2395	24.1899	24.2674	23.8286	24.0073	23.7025
	1.12742	0.240362	Q16851-2	Q16851-2	UTP--glucose-1-phosphate uridylyltransferase	UGP2	Color2 [DarkGray]	1	4					15	15	2	44.7	44.7	2.8	55.676	0	323.31	6450800000	416	27.5637	27.4269	26.4402	26.9705	26.9544	27.2927	27.6575	27.0774	27.7507	26.9714	27.1551	27.1736	26.5743	27.5756	26.7538	27.8324	26.4079	27.1345	26.7216	27.0373	26.6901	27.1389	26.5783	26.7615	27.2982
	1.12589	0.331541	P24534	P24534	Elongation factor 1-beta	EEF1B2	Color2 [DarkGray]	1	4					4	4	4	34.7	34.7	34.7	24.763	0	323.31	3041600000	106	26.7173	26.5914	25.3773	26.4124	25.8996	25.7705	26.5325	26.3114	25.7785	26.2794	25.7138	26.2446	26.917	26.3623	26.7945	25.296	25.1144	25.8666	26.259	26.1091	24.1993	25.6701	26.5888	26.1268	25.5466
	1.12027	0.441375	P49821-2;P49821	P49821-2;P49821	NADH dehydrogenase [ubiquinone] flavoprotein 1, mitochondrial	NDUFV1	Color2 [DarkGray]	1	4					11	11	11	45.7	45.7	45.7	49.867	0	71.309	403550000	66	23.4546	NaN	24.4305	23.754	22.7075	23.9459	23.5478	23.2968	NaN	23.4367	22.5375	23.4404	23.7573	23.403	24.8174	23.5527	22.6193	22.6374	23.115	23.7793	23.6488	23.3473	22.0157	NaN	22.6187
	1.11849	0.633371	P61457	P61457	Pterin-4-alpha-carbinolamine dehydratase	PCBD1	Color2 [DarkGray]	1	4					4	4	4	38.5	38.5	38.5	11.999	0	323.31	4603600000	164	28.4417	26.2563	25.6681	27.7939	26.5366	26.5441	27.9246	26.8401	26.9549	25.7392	27.1039	25.3829	26.3144	26.9303	24.252	25.9621	24.6554	27.3114	27.0641	25.1203	25.6148	26.2627	25.9147	26.4331	25.9486
	1.11842	-0.196438	Q13200;Q13200-3;Q13200-2	Q13200;Q13200-3;Q13200-2	26S proteasome non-ATPase regulatory subunit 2	PSMD2	Color2 [DarkGray]	1	4					21	21	21	35.7	35.7	35.7	100.2	0	323.31	7392700000	452	27.9652	27.0934	27.4403	26.9949	27.9111	27.2303	27.0901	27.4002	27.1066	27.5606	27.0471	27.6968	27.3257	27.0079	27.3694	27.3664	27.006	27.2395	27.464	27.3283	27.4759	27.7078	27.4462	27.515	27.6512
	1.11821	0.491718	P17813-2;P17813	P17813-2;P17813	Endoglin	ENG	Color2 [DarkGray]	1	4					3	3	3	10.1	10.1	10.1	67.541	0	117.74	470030000	41	NaN	23.7066	23.1598	23.7683	24.468	24.5811	NaN	23.1106	25.2485	NaN	24.4399	22.9407	NaN	24.7619	23.092	23.2914	24.4444	23.8615	23.636	22.7828	24.3634	23.2218	23.0615	22.38	24.0169
	1.11803	0.575619	Q9UBI6	Q9UBI6	Guanine nucleotide-binding protein G(I)/G(S)/G(O) subunit gamma-12	GNG12	Color2 [DarkGray]	1	4					2	2	2	25	25	25	8.0061	0.0005005	3.4144	769030000	25	24.2526	25.7566	24.5886	24.7755	NaN	NaN	NaN	NaN	26.0524	23.8954	24.8657	23.6836	24.932	NaN	NaN	25.3581	25.142	24.7253	24.7501	22.6984	NaN	23.9469	NaN	NaN	24.0926
	1.11248	-0.202716	P48643;P48643-2	P48643;P48643-2	T-complex protein 1 subunit epsilon	CCT5	Color2 [DarkGray]	1	4					20	20	20	54.2	54.2	54.2	59.67	0	323.31	7822800000	551	27.1654	27.5503	26.8103	26.8769	27.3342	26.4546	26.9861	27.1987	26.611	27.221	26.9732	27.1626	27.2279	26.835	27.5431	26.8182	26.8553	26.5205	27.3615	27.4967	27.3676	27.4374	27.5655	27.055	27.4876
	1.10976	0.332767	Q53H82	Q53H82	Beta-lactamase-like protein 2	LACTB2	Color2 [DarkGray]	1	4					2	2	2	9.4	9.4	9.4	32.805	0.00026441	4.3007	142920000	45	22.6803	NaN	22.4982	22.3847	22.2146	22.4625	22.1567	22.5377	22.0245	22.2003	22.3111	NaN	22.2633	NaN	21.969	21.5535	NaN	22.8384	22.021	21.9714	21.7277	NaN	22.0631	22.5255	21.5777
	1.10787	-0.551442	Q13409-3;Q13409-2;Q13409-6;Q13409-7;Q13409;Q13409-5	Q13409-3;Q13409-2;Q13409-6;Q13409-7;Q13409	Cytoplasmic dynein 1 intermediate chain 2	DYNC1I2	Color2 [DarkGray]	1	4					3	3	3	12.7	12.7	12.7	68.426	0	126.06	709810000	77	23.4059	23.8986	23.5436	23.1503	24.5869	21.8571	23.4047	23.3314	24.094	23.0739	23.8299	23.3317	23.5783	21.9014	21.9176	26.2743	25.2419	23.5511	23.5436	24.047	23.5197	23.3727	22.9825	22.8953	23.4732
	1.10573	-0.326006	Q15036;Q15036-2	Q15036;Q15036-2	Sorting nexin-17	SNX17	Color2 [DarkGray]	1	4					9	9	9	25.7	25.7	25.7	52.901	0	21.627	668010000	137	22.8291	23.9686	24.3857	23.5997	24.3711	24.0413	22.5957	24.4473	22.9715	23.9054	23.2532	23.8618	23.6614	23.0148	23.8625	25.205	24.5951	24.4757	23.8087	23.8713	23.7326	24.0241	23.9009	24.0854	24.1391
	1.10518	0.504223	Q8NBJ5	Q8NBJ5	Procollagen galactosyltransferase 1	COLGALT1	Color2 [DarkGray]	1	4					11	11	11	18.8	18.8	18.8	71.635	0	113.73	924420000	153	24.2846	24.1033	23.153	23.8934	24.2446	24.9021	25.5495	24.4202	25.9647	23.3092	24.9201	24.806	24.9261	25.813	23.6082	24.7506	24.9028	24.5595	23.2862	25.4917	24.6761	23.6616	23.514	23.6594	23.8945
	1.10425	0.363094	Q9NZD2	Q9NZD2	Glycolipid transfer protein	GLTP	Color2 [DarkGray]	1	4					2	2	2	21.5	21.5	21.5	23.85	0.00026518	4.3493	306120000	48	23.3913	22.0051	23.0558	23.4536	23.7607	NaN	22.826	23.3291	23.0276	23.048	22.6903	22.6694	23.3012	24.1638	23.1386	21.7738	22.9585	23.7456	22.7649	21.3067	22.7619	23.1545	22.8782	22.7614	22.1271
	1.10314	0.839928	P05109	P05109	Protein S100-A8;Protein S100-A8, N-terminally processed	S100A8	Color2 [DarkGray]	1	4					7	7	7	69.9	69.9	69.9	10.834	0	323.31	82108000000	706	31.1385	29.6612	29.2113	30.4346	29.1119	30.9635	31.9109	31.2019	33.3842	30.1101	32.1509	31.4531	31.1826	31.5994	30.1147	29.6516	31.1923	31.0763	28.1301	29.1433	29.9928	29.475	29.4602	30.2644	30.7223
	1.09924	0.286636	Q8NBJ7;Q8NBJ7-3;Q8NBJ7-2;Q8NBJ7-5;Q8NBJ7-4	Q8NBJ7;Q8NBJ7-3;Q8NBJ7-2;Q8NBJ7-5	Sulfatase-modifying factor 2	SUMF2	Color2 [DarkGray]	1	4					6	6	6	25.2	25.2	25.2	33.843	0	28.978	606710000	88	24.7276	22.8989	24.3435	24.2156	24.4164	24.6285	24.293	24.1823	24.1514	23.3038	23.5311	23.8176	24.8272	23.6744	23.5065	23.5341	23.5522	24.3719	23.2565	23.7331	24.2268	24.0366	23.9551	24.2537	23.4373
	1.0963	0.336545	Q9BR76	Q9BR76	Coronin-1B	CORO1B	Color2 [DarkGray]	1	4					10	10	10	32.7	32.7	32.7	54.234	0	117.73	4929300000	288	27.4804	26.3061	26.3223	26.644	26.0767	27.2853	27.1685	27.9713	27.0064	26.6179	26.8946	26.8011	28.4777	25.9104	26.4845	26.4176	26.1524	27.6208	26.5172	27.156	26.7919	25.9454	26.5727	26.7998	26.4412
	1.09315	0.577409	P78417;P78417-3;P78417-2	P78417;P78417-3;P78417-2	Glutathione S-transferase omega-1	GSTO1	Color2 [DarkGray]	1	4					7	7	7	44.8	44.8	44.8	27.566	0	40.585	1445800000	78	26.5721	NaN	25.378	24.7129	24.4398	26.1559	25.9652	26.4044	25.8686	24.9271	24.7216	24.3997	25.6296	25.1926	25.006	23.7667	23.6608	23.4623	NaN	24.3696	24.9369	25.3002	25.8835	25.0413	NaN
	1.09039	0.352768	Q96HE7	Q96HE7	ERO1-like protein alpha	ERO1L	Color2 [DarkGray]	1	4					9	9	9	28.8	28.8	28.8	54.392	0	153.36	1687100000	146	25.6723	25.3548	24.1941	25.0444	25.0842	26.5171	25.528	25.6943	26.2943	24.7424	25.8112	25.2523	25.8419	26.0732	24.8488	24.9204	24.3363	25.2666	24.5695	25.4046	24.9472	24.4843	25.291	24.9805	24.9453
	1.08901	0.76978	P23368;P23368-2	P23368;P23368-2	NAD-dependent malic enzyme, mitochondrial	ME2	Color2 [DarkGray]	1	4					16	16	16	46.1	46.1	46.1	65.443	0	323.31	1897000000	108	23.6893	NaN	24.8553	24.2013	25.559	26.6146	26.0586	26.6481	25.7051	24.967	26.7049	24.3688	25.9088	27.1238	26.7572	24.1914	25.5878	25.3196	21.0361	26.3525	25.1989	25.3467	24.898	24.7587	23.8392
	1.08802	-0.373191	P33993;P33993-3;P33993-2	P33993;P33993-3	DNA replication licensing factor MCM7	MCM7	Color2 [DarkGray]	1	4					13	13	13	25.9	25.9	25.9	81.307	0	145.46	1190400000	155	23.6771	25.8628	24.8087	25.4013	25.0271	24.8743	24.2879	24.3691	23.4018	25.3337	23.856	25.3751	24.5669	23.8277	24.2859	25.6077	23.9125	NaN	25.3974	25.7746	24.7421	24.9238	25.7894	24.9731	25.2723
	1.08742	-0.198086	P41252	P41252	Isoleucine--tRNA ligase, cytoplasmic	IARS	Color2 [DarkGray]	1	4					22	22	22	27.3	27.3	27.3	144.5	0	138.92	1485200000	300	24.9913	24.9837	25.2454	25.6551	25.2906	25.0076	24.5429	24.7841	24.46	25.3235	25.0099	25.2101	24.9651	24.7051	25.2413	24.9475	24.5474	25.0912	25.2366	25.4804	25.1609	24.9268	25.4305	24.8499	25.4896
	1.08739	-0.403074	Q8IX12-2;Q8IX12	Q8IX12-2;Q8IX12	Cell division cycle and apoptosis regulator protein 1	CCAR1	Color2 [DarkGray]	1	4					7	7	7	9.6	9.6	9.6	131.04	0	66.389	373020000	56	22.4356	22.776	23.3672	NaN	23.1334	22.9167	23.2939	22.976	21.9515	24.0186	24.1084	24.1943	NaN	22.2258	24.1088	23.4817	NaN	NaN	23.2595	24.812	23.4895	23.5546	23.8649	23.4464	23.8929
	1.08715	-0.379886	Q9NZL4-3;Q9NZL4;Q9NZL4-2	Q9NZL4-3;Q9NZL4;Q9NZL4-2	Hsp70-binding protein 1	HSPBP1	Color2 [DarkGray]	1	4					7	7	7	26.1	26.1	26.1	44.302	0	23.481	199930000	66	21.844	21.8881	22.6193	22.3804	22.0568	22.4281	22.2976	21.854	NaN	22.1944	NaN	22.6554	21.8734	NaN	NaN	24.3673	23.1109	22.1765	22.0636	22.3584	NaN	23.1334	NaN	22.389	22.0489
	1.08559	0.744086	Q9Y6N5	Q9Y6N5	Sulfide:quinone oxidoreductase, mitochondrial	SQRDL	Color2 [DarkGray]	1	4					9	9	9	26	26	26	49.96	0	94.242	1630500000	121	24.4728	23.2455	26.4795	23.6257	24.552	26.288	25.7035	26.5719	24.1341	25.0671	25.0288	25.5039	25.9887	24.9786	26.5845	24.1969	23.1267	25.6956	21.9951	26.9388	24.7533	24.107	24.6891	23.8755	24.1752
	1.08339	0.585755	Q16822;Q16822-3;Q16822-2;P35558	Q16822;Q16822-3	Phosphoenolpyruvate carboxykinase [GTP], mitochondrial	PCK2	Color2 [DarkGray]	1	4					15	15	15	36.2	36.2	36.2	70.698	0	185.87	1836300000	246	24.7791	24.2623	26.7027	24.9208	24.5752	26.5339	26.4986	25.2956	25.159	25.4052	25.419	25.6196	25.1603	26.346	26.0763	25.3713	24.7123	25.4559	25.1295	26.3422	25.1955	25.2791	24.4181	25.5129	22.7624
	1.0791	0.409902	Q96CX2;Q68DU8;Q6ZWB6	Q96CX2	BTB/POZ domain-containing protein KCTD12	KCTD12	Color2 [DarkGray]	1	4					13	13	13	48	48	48	35.7	0	225.25	16949000000	448	28.9272	28.3988	27.4514	28.7255	28.4093	29.2179	29.7283	29.1661	28.8894	27.7664	28.3838	27.4724	30.0096	28.9875	27.3986	28.0858	27.7759	29.5964	28.3001	27.8678	28.3095	27.8694	28.341	28.4167	28.2601
	1.07701	0.439966	P51858-2;P51858;P51858-3	P51858-2;P51858;P51858-3	Hepatoma-derived growth factor	HDGF	Color2 [DarkGray]	1	4					9	9	9	51.9	51.9	51.9	25.537	0	323.31	3883200000	97	28.0087	26.7436	NaN	26.1341	26.2211	25.6452	26.0951	27.4409	26.1453	26.4884	26.2465	26.5547	27.0163	25.8209	26.0236	25.6286	24.4434	27.3844	25.8651	26.8762	25.8397	26.7717	26.3891	25.2706	26.6525
	1.07624	0.5541	Q5K4L6;Q5K4L6-2;Q5K4L6-3	Q5K4L6;Q5K4L6-2	Long-chain fatty acid transport protein 3	SLC27A3	Color2 [DarkGray]	1	4					6	6	6	17.6	17.6	17.6	73.55	0	106.51	299360000	31	23.7209	23.4154	22.8913	22.522	23.8457	24.9007	22.8971	NaN	NaN	NaN	23.714	22.4156	23.8895	23.6678	23.1369	23.2066	22.9191	NaN	23.0026	24.6294	NaN	NaN	NaN	22.1127	21.643
	1.07541	0.537471	Q13510-2;Q13510;Q13510-3	Q13510-2;Q13510;Q13510-3	Acid ceramidase;Acid ceramidase subunit alpha;Acid ceramidase subunit beta	ASAH1	Color2 [DarkGray]	1	4					7	7	7	23.8	23.8	23.8	46.503	0	222.69	2218600000	149	27.7355	25.2043	25.4216	25.7897	25.1796	26.6826	26.4338	26.2222	25.854	24.8465	25.2989	25.2737	25.67	24.8668	24.6413	25.5083	25.2628	26.019	25.3383	25.1764	25.4278	24.9023	26.1522	26.2567	25.5867
	1.07388	-0.59429	Q9Y3B4	Q9Y3B4	Splicing factor 3B subunit 6	SF3B6	Color2 [DarkGray]	1	4					2	2	2	20.8	20.8	20.8	14.585	0	94.839	289000000	39	22.6737	23.5385	23.4427	22.1891	23.2236	NaN	NaN	23.3711	NaN	23.7553	20.0581	20.7143	NaN	22.8613	23.6654	22.784	23.212	NaN	23.9834	23.5778	22.9929	22.9799	23.4507	23.3648	23.5267
	1.06083	0.398287	P50135	P50135	Histamine N-methyltransferase	HNMT	Color2 [DarkGray]	1	4					5	5	5	31.2	31.2	31.2	33.295	0	102.72	561220000	78	25.7145	23.384	22.4491	23.4664	23.9775	23.9136	24.2867	24.6117	23.4769	23.5433	24.654	23.4178	24.5752	24.491	23.4722	23.3357	23.3374	23.5991	22.9295	23.7633	23.7471	23.7238	23.6667	NaN	24.6415
	1.06043	-0.316556	Q92888;Q92888-3;Q92888-2;Q92888-4	Q92888;Q92888-3;Q92888-2;Q92888-4	Rho guanine nucleotide exchange factor 1	ARHGEF1	Color2 [DarkGray]	1	4					24	24	24	33.9	33.9	33.9	102.43	0	323.31	7261400000	505	26.8711	27.4313	27.5916	27.5914	27.9591	26.4672	26.6782	27.0487	26.0984	27.5726	26.4802	27.7206	27.0187	26.2787	27.591	26.5879	26.9242	27.498	27.817	27.5192	27.0918	27.6877	27.4943	27.6634	27.9735
	1.05973	0.428633	P05556-2;P05556;P05556-5;P05556-4;P05556-3	P05556-2;P05556;P05556-5;P05556-4;P05556-3	Integrin beta-1	ITGB1	Color2 [DarkGray]	1	4					6	6	6	12.2	12.2	12.2	87.445	0	11.016	1092300000	87	24.6405	23.5956	23.6847	24.6183	24.2799	25.6969	24.8588	24.5019	25.562	24.3819	23.8963	24.4713	24.7627	26.2777	25.7273	23.9005	25.2866	24.2775	23.2557	24.3232	24.7545	24.497	23.9483	23.8802	23.8976
	1.05942	-0.442528	P33176;O60282-2;Q12840	P33176	Kinesin-1 heavy chain	KIF5B	Color2 [DarkGray]	1	4					10	10	8	15	15	11.9	109.68	0	208.17	664540000	107	22.0581	23.3005	22.724	22.9393	22.9296	23.2908	23.0302	24.0449	23.7342	24.3014	23.4805	24.3471	23.4422	23.3348	24.0663	25.2615	23.1577	24.2025	22.5194	24.6218	24.0988	23.6237	24.1298	22.8646	24.1067
	1.05718	-0.350034	A0AVT1;A0AVT1-2;A0AVT1-4;A0AVT1-3	A0AVT1;A0AVT1-2	Ubiquitin-like modifier-activating enzyme 6	UBA6	Color2 [DarkGray]	1	4					14	14	14	19.6	19.6	19.6	117.97	0	323.31	598780000	122	23.2693	22.9484	23.3676	23.717	24.3552	23.0067	22.7344	24.1304	23.1668	24.0488	22.2663	24.1565	24.5676	22.7461	24.7774	23.4512	24.2447	23.6772	23.7581	23.5443	23.4578	24.8067	24.2632	23.9914	23.5554
	1.05454	-0.801923	Q96AG4	Q96AG4	Leucine-rich repeat-containing protein 59	LRRC59	Color2 [DarkGray]	1	4					9	9	9	39.7	39.7	39.7	34.93	0	85.002	638020000	56	NaN	21.082	22.0943	22.7207	NaN	22.5224	22.3304	22.3714	24.2099	24.2455	24.0523	22.916	23.1121	23.7886	23.7165	24.7523	24.8002	NaN	21.8356	25.3476	25.1362	NaN	23.3844	NaN	23.2833
	1.04968	-0.517339	P55060-3;P55060;P55060-4;P55060-2	P55060-3;P55060;P55060-4	Exportin-2	CSE1L	Color2 [DarkGray]	1	4					21	21	21	34	34	34	107.78	0	323.31	245070000000	305	32.2177	30.5953	33.2984	31.439	31.1217	31.783	31.6173	32.7256	31.7149	32.9381	31.6891	33.0026	32.1024	33.0009	32.0615	32.3434	32.2732	29.516	33.3197	32.6188	32.6114	34.7924	32.3733	32.9721	32.4018
	1.04875	-0.321266	Q99439;Q99439-2	Q99439;Q99439-2	Calponin-2	CNN2	Color2 [DarkGray]	1	4					6	6	6	34.3	34.3	34.3	33.697	0	323.31	4397100000	228	26.5635	26.9111	26.5694	25.9754	26.1818	24.9965	25.0478	26.616	26.0915	27.0695	25.5646	26.8223	26.5052	25.41	26.8899	26.5486	26.6836	26.4592	26.1833	26.4333	27.8113	26.3144	26.224	26.5925	26.4991
	1.04789	1.09922	Q8WZ42-11;Q8WZ42-4;Q8WZ42-7;Q8WZ42-2;Q8WZ42;Q8WZ42-8;Q8WZ42-13;Q8WZ42-12;Q8WZ42-5;Q8WZ42-3;Q8WZ42-10;Q8WZ42-9	Q8WZ42-11;Q8WZ42-4;Q8WZ42-7;Q8WZ42-2;Q8WZ42;Q8WZ42-8;Q8WZ42-13;Q8WZ42-12;Q8WZ42-5;Q8WZ42-3;Q8WZ42-10;Q8WZ42-9	Titin	TTN	Color2 [DarkGray]	1	4					82	82	75	3.9	3.9	3.6	3713.6	0	207.99	808690000	116	22.6659	23.2184	29.1888	20.8783	24.3307	20.7238	NaN	NaN	23.8071	22.6552	23.5804	23.103	NaN	22.6131	23.5206	19.7907	22.2986	21.7038	22.7167	20.7095	21.9712	19.5646	NaN	23.576	21.1425
	1.04677	-0.487442	Q99720-5;Q99720-2;Q99720;Q99720-3	Q99720-5;Q99720-2;Q99720	Sigma non-opioid intracellular receptor 1	SIGMAR1	Color2 [DarkGray]	1	4					3	3	3	33.7	33.7	33.7	21.013	0	25.336	76103000	20	NaN	NaN	20.9947	21.3043	20.3971	20.9377	NaN	21.3582	21.1636	20.5244	NaN	21.4718	21.1062	NaN	20.1738	NaN	21.4872	22.1165	21.3887	20.2924	20.6306	21.3355	NaN	NaN	21.9816
	1.04471	-0.663481	Q16658	Q16658	Fascin	FSCN1	Color2 [DarkGray]	1	4					10	10	10	32.3	32.3	32.3	54.529	0	323.31	12090000000	298	27.2553	27.7076	28.5352	27.5016	27.7023	28.142	23.1929	25.4248	28.1703	28.6851	28.764	28.6599	26.6759	28.4242	28.4692	27.7867	27.8168	26.1566	28.1421	27.8452	27.8779	28.9705	29.2509	27.9828	28.5848
	1.04238	0.482417	P30536	P30536	Translocator protein	TSPO	Color2 [DarkGray]	1	4					2	2	2	29	29	29	18.828	0	8.9494	284640000	38	23.1736	NaN	NaN	NaN	22.9841	23.4316	22.9665	23.8557	22.8651	NaN	24.3083	23.9781	22.2163	23.3785	22.9614	NaN	NaN	23.2109	22.2493	NaN	23.5301	22.6601	NaN	22.4024	NaN
	1.04194	0.455498	Q86X76-2;Q86X76-4;Q86X76;Q86X76-3;Q86X76-5	Q86X76-2;Q86X76-4;Q86X76;Q86X76-3	Nitrilase homolog 1	NIT1	Color2 [DarkGray]	1	4					9	9	9	53.3	53.3	53.3	31.858	0	245.95	1867900000	127	26.2836	25.3057	25.6674	25.9208	25.7958	25.8147	26.1849	26.014	25.5139	25.8121	25.6322	25.9406	25.5235	24.5792	25.6159	24.6414	22.7413	26.0249	24.9211	25.2156	23.3481	26.3446	26.0798	26.3385	25.191
	1.04194	-0.576114	P0C0L5	P0C0L5	Complement C4-B;Complement C4 beta chain;Complement C4-B alpha chain;C4a anaphylatoxin;C4b-B;C4d-B;Complement C4 gamma chain	C4B	Color2 [DarkGray]	1	4					42	3	3	42.9	3	3	192.75	0	71.631	827000000	97	22.1632	23.3377	NaN	23.8051	22.0544	23.5232	22.3589	NaN	25.1728	23.8553	24.2652	24.1542	24.0471	24.0546	23.8275	24.1935	24.2879	23.2318	NaN	22.6574	23.7645	23.5497	23.4919	NaN	23.1791
	1.04	0.598306	P09601	P09601	Heme oxygenase 1	HMOX1	Color2 [DarkGray]	1	4					8	8	8	41.7	41.7	41.7	32.818	0	46.39	1528400000	159	26.1333	24.0279	24.1415	25.5727	25.2656	25.2185	25.9812	26.3636	23.9679	24.1173	24.6362	23.9179	27.3988	24.6325	23.5843	24.1143	24.6425	25.7051	24.0429	25.1266	24.939	23.5387	24.4372	25.0968	24.0261
	1.03821	-0.582989	P50851;P50851-2;Q8NFP9-3	P50851;P50851-2	Lipopolysaccharide-responsive and beige-like anchor protein	LRBA	Color2 [DarkGray]	1	4					17	17	15	10.1	10.1	9.1	319.1	0	323.31	804050000	143	23.3013	24.5843	24.8563	24.1809	24.6943	22.53	22.1839	23.5723	22.9493	24.7063	22.7976	24.8405	22.3633	22.5182	24.8439	23.6977	23.8183	24.3681	24.9304	24.3839	24.122	25.558	24.1309	23.455	25.1637
	1.03732	0.593688	P33121-2;P33121-3;P33121	P33121-2;P33121-3;P33121	Long-chain-fatty-acid--CoA ligase 1	ACSL1	Color2 [DarkGray]	1	4					11	11	11	18.9	18.9	18.9	76.87	0	59.046	1007300000	111	24.1898	NaN	24.1939	24.0804	23.1029	26.4018	26.2414	24.7369	25.9602	23.9557	24.4544	23.186	26.0397	24.4687	25.2175	23.3931	24.1475	24.4394	23.3163	26.0649	23.5059	22.7802	23.758	22.6763	23.535
	1.0342	0.412932	Q9BU02;Q9BU02-2	Q9BU02;Q9BU02-2	Thiamine-triphosphatase	THTPA	Color2 [DarkGray]	1	4					7	7	7	48.7	48.7	48.7	25.566	0	134.77	815530000	100	25.3472	24.259	23.301	24.8593	24.1851	24.6986	24.7194	24.8533	24.0074	24.1253	24.5596	23.4198	24.1758	24.1943	23.548	22.4038	24.2378	24.936	23.5703	23.1468	23.6859	24.1691	24.2726	24.6369	24.2274
	1.0337	0.492517	Q9Y696	Q9Y696	Chloride intracellular channel protein 4	CLIC4	Color2 [DarkGray]	1	4					7	6	6	41.9	38.7	38.7	28.772	0	26.205	182770000	40	22.3017	NaN	22.386	22.9982	NaN	23.4713	NaN	21.7008	23.9851	22.1241	22.6326	22.7794	23.2917	23.0961	NaN	22.046	NaN	22.2854	22.8712	21.2092	23.8606	NaN	21.864	NaN	NaN
	1.03193	0.25321	P21399	P21399	Cytoplasmic aconitate hydratase	ACO1	Color2 [DarkGray]	1	4					17	17	17	30.7	30.7	30.7	98.398	0	323.31	5421600000	544	27.6506	26.7457	26.4297	26.4294	26.4089	27.8321	27.722	27.7214	27.238	26.6667	27.0343	27.1319	26.7137	26.9209	26.3335	26.9179	27.1136	26.9607	26.1188	27.2926	27.4473	26.4325	26.6377	26.3847	26.519
	1.03145	1.23537	P55058-3;P55058-2;P55058;P55058-4	P55058-3;P55058-2;P55058;P55058-4	Phospholipid transfer protein	PLTP	Color2 [DarkGray]	1	4					8	8	8	31.2	31.2	31.2	44.135	0	135.7	738060000	92	NaN	NaN	21.3619	23.1068	NaN	23.8944	25.4303	21.7693	26.8059	23.2213	25.0771	22.209	24.5783	25.3977	NaN	26.6258	25.1013	21.0377	NaN	21.2466	23.4595	20.9871	21.0258	NaN	22.8303
	1.02797	0.521589	Q08AG7	Q08AG7	Mitotic-spindle organizing protein 1	MZT1	Color2 [DarkGray]	1	4					2	2	2	32.9	32.9	32.9	8.4787	0	9.2312	209270000	39	22.7737	22.9625	22.4834	24.2831	22.9674	23.374	23.0326	22.7086	NaN	NaN	21.9294	21.6316	NaN	NaN	NaN	22.4847	21.5921	22.628	21.0798	21.7312	22.9759	23.0217	23.0662	23.4325	21.9518
	1.02477	-0.544862	Q6P2E9;Q6P2E9-2	Q6P2E9;Q6P2E9-2	Enhancer of mRNA-decapping protein 4	EDC4	Color2 [DarkGray]	1	4					14	14	14	20.9	20.9	20.9	151.66	0	112.59	790450000	143	21.4387	24.5478	24.2585	24.1971	24.6914	23.2525	24.2495	24.3705	23.3001	25.2403	23.8499	25.5346	22.5286	21.1585	24.5503	23.8549	24.945	24.6186	23.4849	24.7543	24.7159	24.9428	24.2745	22.59	24.727
	1.024	-0.594398	Q9H3S7	Q9H3S7	Tyrosine-protein phosphatase non-receptor type 23	PTPN23	Color2 [DarkGray]	1	4					8	8	8	9.3	9.3	9.3	178.97	0	19.992	256850000	41	20.3831	22.0289	NaN	21.8162	21.0895	21.4218	21.5889	21.7471	NaN	22.5861	NaN	22.5825	22.0578	21.7913	21.6067	25.9234	22.8023	22.0235	22.2193	21.7952	22.9599	21.2093	NaN	22.0015	22.5793
	1.02355	-0.459207	P35611-2;P35611-6;P35611;P35611-3;P35611-4;P35611-5	P35611-2;P35611-6;P35611;P35611-3;P35611-4;P35611-5	Alpha-adducin	ADD1	Color2 [DarkGray]	1	4					9	9	9	26	26	26	69.984	0	64.142	1332200000	131	23.4269	24.4331	25.1022	24.7079	25.0404	24.5039	23.9044	22.0207	24.1601	25.2616	24.3674	24.9386	24.253	24.5689	25.9764	24.3729	24.9436	26.5076	24.9208	25.2996	24.8446	25.0273	23.9197	23.9027	25.0242
	1.02264	-0.427541	Q2TAY7;Q2TAY7-2	Q2TAY7	WD40 repeat-containing protein SMU1;WD40 repeat-containing protein SMU1, N-terminally processed	SMU1	Color2 [DarkGray]	1	4					9	9	9	27.7	27.7	27.7	57.543	0	323.31	586280000	134	NaN	22.632	24.6771	22.9955	23.6253	23.5473	23.4784	23.0686	20.9565	23.859	23.1721	24.618	23.2064	23.3453	24.2345	22.9844	22.9245	23.3142	23.3083	24.388	24.3791	24.0374	23.6756	23.884	24.1598
	1.01971	-0.453117	P09104;P09104-2	P09104;P09104-2	Gamma-enolase	ENO2	Color2 [DarkGray]	1	4					13	10	10	54.4	41.7	41.7	47.268	0	323.31	1538200000	158	25.0756	25.5736	24.7196	24.8293	24.832	25.1725	23.427	24.9823	24.6878	25.4781	25.4033	25.6573	24.5476	NaN	22.6936	24.8232	23.943	24.5165	25.6027	24.0627	24.464	25.4395	26.1199	25.5218	25.1739
	1.0181	-0.59251	P09874	P09874	Poly [ADP-ribose] polymerase 1	PARP1	Color2 [DarkGray]	1	4					16	16	16	24.8	24.8	24.8	113.08	0	323.31	3626900000	263	24.1612	24.1334	26.968	25.2572	26.1213	25.0168	25.0119	25.3937	23.1964	26.773	25.7511	27.1149	25.9428	25.5826	28.094	25.5713	26.2303	25.4483	25.5295	27.218	26.8367	26.3473	26.5247	24.8295	26.4807
	1.01677	-0.288038	Q92616	Q92616	Translational activator GCN1	GCN1L1	Color2 [DarkGray]	1	4					45	45	45	25.6	25.6	25.6	292.75	0	323.31	2689000000	510	24.7075	25.6333	26.4623	25.3177	26.0694	26.1502	25.5445	25.4701	25.402	25.9234	25.3847	26.2232	25.0765	25.5765	26.693	26.1288	26.261	25.1967	25.5641	26.3444	26.5425	26.3978	25.6899	25.6067	26.2613
	1.01346	-0.713884	O95299;O95299-2	O95299;O95299-2	NADH dehydrogenase [ubiquinone] 1 alpha subcomplex subunit 10, mitochondrial	NDUFA10	Color2 [DarkGray]	1	4					5	5	5	24.8	24.8	24.8	40.75	0	226.05	455770000	52	NaN	NaN	NaN	21.5044	20.8179	23.1613	22.5988	23.2485	22.0982	23.2227	23.1985	22.8639	23.3769	21.6002	24.1211	24.7287	24.916	NaN	22.0516	25.065	22.4053	22.1938	NaN	22.7215	23.5374
	1.00857	0.414392	P37108	P37108	Signal recognition particle 14 kDa protein	SRP14	Color2 [DarkGray]	1	4					4	4	4	46.3	46.3	46.3	14.57	0	323.31	1449400000	124	24.4475	25.6679	25.9193	24.9284	24.6463	24.4198	24.412	25.756	23.6632	25.0689	24.1132	24.2726	24.8669	24.5345	25.813	24.4763	25.5657	24.5422	24.8853	25.3969	24.2959	24.4182	24.082	25.0888	24.184
	1.00756	0.269934	P19623	P19623	Spermidine synthase	SRM	Color2 [DarkGray]	1	4					9	9	9	50.7	50.7	50.7	33.824	0	13.873	2064100000	147	25.6925	25.153	25.5646	26.1428	25.7263	25.9131	26.3876	24.732	25.8849	25.1648	25.392	25.537	25.8434	25.8311	25.1802	25.1118	25.2576	25.9274	25.8516	24.1605	25.8618	25.25	25.1398	25.7446	25.2047
	1.00532	-0.34992	Q9H400;Q9H400-2	Q9H400;Q9H400-2	Lck-interacting transmembrane adapter 1	LIME1	Color2 [DarkGray]	1	4					5	5	5	28.8	28.8	28.8	31.288	0	20.293	216300000	39	22.5681	23.4158	22.4462	NaN	23.233	NaN	23.1547	22.9661	NaN	22.7989	23.4016	22.4411	NaN	NaN	22.0271	NaN	NaN	NaN	24.0132	22.697	NaN	22.6478	22.7001	23.0968	23.1906
	1.00483	0.384938	Q7Z434;Q7Z434-2;Q7Z434-5;Q7Z434-4	Q7Z434;Q7Z434-2	Mitochondrial antiviral-signaling protein	MAVS	Color2 [DarkGray]	1	4					5	5	5	16.9	16.9	16.9	56.527	0	111.13	452740000	68	23.9986	23.7644	23.3051	22.3968	23.5967	23.8073	24.3386	22.5916	23.4545	23.3782	23.5386	23.6855	23.8727	24.8125	22.7985	22.6964	22.9022	24.9671	22.2882	23.6158	24.0405	24.0778	23.2829	22.4533	22.1805
	1.00403	-0.382253	P22681	P22681	E3 ubiquitin-protein ligase CBL	CBL	Color2 [DarkGray]	1	4					7	7	7	9.3	9.3	9.3	99.632	0	14.958	384520000	40	22.8511	23.8063	22.6448	22.6928	24.5025	NaN	23.3251	23.2278	22.9166	23.0672	NaN	22.9147	22.3084	NaN	23.9902	22.3804	NaN	24.0263	23.0462	23.9125	23.4578	24.2399	23.1188	23.6634	23.1726
	1.00383	-0.224174	P62191;P62191-2	P62191;P62191-2	26S protease regulatory subunit 4	PSMC1	Color2 [DarkGray]	1	4					8	8	8	29.5	29.5	29.5	49.184	0	323.31	3756600000	336	25.8557	26.1024	25.9665	26.371	26.9611	25.9847	26.0011	26.3209	25.5543	26.33	25.8007	26.605	26.0949	25.2374	25.9395	25.6408	26.243	26.1277	26.6418	26.2695	26.4225	26.1116	26.5114	25.8636	26.571
	0.999069	0.337429	Q86Y82	Q86Y82	Syntaxin-12	STX12	Color2 [DarkGray]	1	4					5	5	5	25.4	25.4	25.4	31.642	0	132.33	788080000	88	24.2474	23.6141	23.2122	25.0285	23.7744	24.3496	25.7275	24.2455	24.9572	23.928	24.228	23.3927	24.25	25.3522	23.5959	24.4	23.8816	24.3473	23.8439	24.1622	24.5642	23.4799	23.0072	NaN	23.9883
	0.999067	-0.300877	O60256;O60256-4;O60256-2;O60256-3	O60256;O60256-4;O60256-2;O60256-3	Phosphoribosyl pyrophosphate synthase-associated protein 2	PRPSAP2	Color2 [DarkGray]	1	4					10	10	10	39.3	39.3	39.3	40.925	0	215.74	1370800000	261	24.0251	25.3454	25.5441	23.8229	25.0215	24.2429	24.0921	24.4074	NaN	25.1401	23.3799	24.8641	24.2493	23.6486	25.0005	24.3273	24.2472	24.6141	25.3207	24.7475	24.4761	25.6521	24.5604	24.633	24.7443
	0.998148	-0.554714	O94874;O94874-2;O94874-3	O94874;O94874-2;O94874-3	E3 UFM1-protein ligase 1	UFL1	Color2 [DarkGray]	1	4					8	8	8	15	15	15	89.594	0	85.717	414510000	62	NaN	NaN	23.4599	NaN	21.7862	22.7574	22.2067	22.2425	22.7904	22.4413	22.3635	22.5167	22.6849	22.0051	21.967	25.7896	24.6626	22.7134	22.639	24.2909	22.5443	23.2079	21.5547	22.364	23.9724
	0.997959	0.369069	Q9UK41;Q9UK41-2	Q9UK41;Q9UK41-2	Vacuolar protein sorting-associated protein 28 homolog	VPS28	Color2 [DarkGray]	1	4					5	5	5	36.2	36.2	36.2	25.425	0	90.871	242370000	38	23.0662	NaN	NaN	NaN	23.1075	NaN	NaN	22.4035	22.9986	22.6962	NaN	23.541	23.2788	22.6947	23.3134	NaN	NaN	23.1599	22.9057	22.8562	22.496	23.4605	22.4676	23.5308	22.8931
	0.99704	0.42317	Q96AQ6;Q96AQ6-3;Q96AQ6-2	Q96AQ6;Q96AQ6-3;Q96AQ6-2	Pre-B-cell leukemia transcription factor-interacting protein 1	PBXIP1	Color2 [DarkGray]	1	4					6	6	6	14.8	14.8	14.8	80.642	0	16.318	249430000	36	NaN	NaN	24.0915	22.6237	NaN	NaN	22.4612	22.2878	22.3688	22.4107	23.0371	23.5218	23.239	22.9829	22.5542	23.0709	22.8585	21.8441	22.3665	21.6035	21.0435	22.8839	22.7996	NaN	NaN
	0.99499	-0.418339	Q12802-4;Q12802;Q12802-2	Q12802-4;Q12802;Q12802-2	A-kinase anchor protein 13	AKAP13	Color2 [DarkGray]	1	4					14	14	14	9.2	9.2	9.2	305.28	0	169.59	637020000	105	23.7603	24.0759	23.356	24.1356	24.8089	21.7094	22.8757	23.7308	23.2452	23.8281	23.0149	24.6678	22.8494	22.677	24.164	23.7354	22.7965	24.0449	24.805	24.3772	23.8261	24.2131	23.7484	22.8022	24.581
	0.988966	0.338921	Q9Y4P1;Q9Y4P1-6;Q9Y4P1-2;Q9Y4P1-4;Q9Y4P1-3	Q9Y4P1;Q9Y4P1-6;Q9Y4P1-2;Q9Y4P1-4	Cysteine protease ATG4B	ATG4B	Color2 [DarkGray]	1	4					5	5	5	19.6	19.6	19.6	44.294	0	223.92	328600000	91	22.2491	23.931	22.8521	23.888	23.8367	22.2423	22.6647	22.8006	22.6181	23.2992	22.6752	23.748	23.1569	22.616	22.2255	22.283	21.6547	22.6043	23.022	21.7054	23.1543	22.5984	23.2299	23.5908	23.013
	0.988881	-0.213371	Q99460-2;Q99460	Q99460-2;Q99460	26S proteasome non-ATPase regulatory subunit 1	PSMD1	Color2 [DarkGray]	1	4					16	16	16	29.4	29.4	29.4	102.26	0	323.31	3043500000	332	26.3271	25.9783	25.7585	26.084	26.5246	25.7475	25.8413	26.0738	25.5689	26.09	25.6545	26.6276	25.5218	25.6071	25.5329	25.8659	25.4192	26.3217	26.3379	25.9419	26.1553	25.5565	26.6089	25.8447	26.421
	0.987887	-0.561864	P43246;P43246-2	P43246;P43246-2	DNA mismatch repair protein Msh2	MSH2	Color2 [DarkGray]	1	4					5	5	5	7.5	7.5	7.5	104.74	0	48.413	106420000	39	21.1908	NaN	22.1099	21.8291	22.367	21.447	NaN	20.9889	20.3614	NaN	NaN	22.0293	NaN	NaN	21.4238	NaN	22.7056	NaN	NaN	23.2389	22.6095	22.3593	22.5817	21.3026	22.8735
	0.981759	-0.474315	P12270;P12270-2	P12270	Nucleoprotein TPR	TPR	Color2 [DarkGray]	1	4					21	21	21	13.7	13.7	13.7	267.29	0	323.31	1651400000	183	24.2227	24.9829	25.3949	24.7491	24.5899	24.5086	23.8341	23.168	23.261	25.1961	25.1683	26.2219	25.0623	25.0057	25.5155	25.7686	26.1823	24.7458	24.8344	25.942	25.2829	26.0358	24.7799	23.6469	26.0403
	0.981557	-0.250443	Q13185;P45973	Q13185	Chromobox protein homolog 3	CBX3	Color2 [DarkGray]	1	4					7	7	6	45.9	45.9	37.2	20.811	0	323.31	3210800000	294	26.0048	25.4543	25.3821	25.6816	25.1704	25.5497	25.7644	26.1615	25.3343	26.1088	25.2917	25.73	25.4607	24.6873	25.6117	25.1492	24.9138	25.5388	25.6319	26.4365	25.0351	25.6595	26.1908	25.3798	25.3811
	0.979371	0.475152	Q9NP97;Q8TF09;Q9NP97-2	Q9NP97;Q8TF09	Dynein light chain roadblock-type 1;Dynein light chain roadblock-type 2	DYNLRB1;DYNLRB2	Color2 [DarkGray]	1	4					4	4	4	59.4	59.4	59.4	10.921	0	15.2	3154600000	119	26.9632	26.9478	26.5045	26.8449	26.4053	26.3544	26.9664	26.8303	26.1385	25.5867	26.2267	25.3491	26.2658	25.9235	24.6978	25.8582	24.0673	27.0598	27.1191	25.3098	26.0909	26.2668	26.6623	26.8795	24.2767
	0.978387	-0.63258	Q16566	Q16566	Calcium/calmodulin-dependent protein kinase type IV	CAMK4	Color2 [DarkGray]	1	4					2	2	2	7.8	7.8	7.8	51.925	0	84.06	139610000	37	20.5375	23.9876	NaN	21.4371	22.1895	19.9038	NaN	NaN	19.7726	21.461	19.9283	21.5139	20.2166	NaN	NaN	22.787	22.0138	NaN	21.5073	21.6269	23.4013	22.0196	21.0386	21.5712	22.3222
	0.977437	0.20888	P35237	P35237	Serpin B6	SERPINB6	Color2 [DarkGray]	1	4					16	16	16	61.4	61.4	61.4	42.621	0	256.99	5265900000	354	27.1729	26.5441	27.2453	27.0254	27.4989	27.7247	26.953	27.4457	27.6728	26.7623	26.4443	26.6665	26.8307	27.3501	26.455	26.6103	26.6617	26.8551	26.814	26.6503	27.075	26.6253	27.0483	26.6895	27.2623
	0.975963	0.459207	Q8WUW1;Q8WUW1-2	Q8WUW1;Q8WUW1-2	Protein BRICK1	BRK1	Color2 [DarkGray]	1	4					2	2	2	32	32	32	8.7448	0	111.26	1649700000	105	25.9019	25.4474	24.927	25.7315	25.7376	25.8543	25.0011	26.2952	25.0068	25.079	24.9214	24.4904	26.0821	24.7071	24.5572	24.0026	23.6437	26.1186	26.1647	25.5012	25.3509	25.1708	25.0478	25.7669	25.0458
	0.974345	-0.517917	Q86YV0;Q86YV0-2	Q86YV0;Q86YV0-2	RAS protein activator like-3	RASAL3	Color2 [DarkGray]	1	4					15	15	15	20.2	20.2	20.2	111.9	0	323.31	3361400000	318	25.3886	26.7261	27.3913	26.49	27.1273	24.8377	25.2997	25.0647	22.8517	26.4428	25.4127	26.7218	25.1339	24.8576	26.6488	25.944	25.6898	26.2706	27.1311	26.2234	25.8857	26.9999	26.4379	26.3741	26.7822
	0.973835	-0.305176	P48444;P48444-2	P48444;P48444-2	Coatomer subunit delta	ARCN1	Color2 [DarkGray]	1	4					10	10	10	30.9	30.9	30.9	57.21	0	45.31	926950000	155	23.1606	23.3656	24.5677	23.7194	24.1493	24.2487	24.4492	23.7792	24.1132	24.38	24.279	24.5114	24.0189	24.3086	24.6511	24.1621	24.8915	24.404	24.1897	24.969	24.6449	24.368	24.6547	24.0645	24.392
	0.972438	-0.313502	P78344-2;P78344	P78344-2;P78344	Eukaryotic translation initiation factor 4 gamma 2	EIF4G2	Color2 [DarkGray]	1	4					16	16	16	24.9	24.9	24.9	98.149	0	87.134	679300000	151	23.3207	24.0478	23.7091	23.8765	24.237	23.7577	23.9776	23.8517	22.4896	24.5036	23.5176	24.4488	22.5465	23.5355	24.3179	24.361	24.2374	NaN	23.0828	24.0621	24.2394	24.6042	24.5842	23.1109	24.7008
	0.969247	0.561004	P07602;P07602-2;P07602-3	P07602;P07602-2;P07602-3	Prosaposin;Saposin-A;Saposin-B-Val;Saposin-B;Saposin-C;Saposin-D	PSAP	Color2 [DarkGray]	1	4					9	9	9	24	24	24	58.112	0	323.31	34919000000	293	31.7666	28.358	28.6341	30.5506	29.7055	30.4711	29.9272	30.8346	30.323	29.0224	29.5332	29.6177	28.9018	28.8808	28.738	29.0799	27.9686	30.0028	28.9985	29.4638	29.7802	28.838	30.7045	30.3446	28.4235
	0.968291	-0.389231	P10398;P04049;P04049-2	P10398	Serine/threonine-protein kinase A-Raf	ARAF	Color2 [DarkGray]	1	4					6	6	4	12.2	12.2	9.1	67.585	0	12.406	197880000	65	NaN	22.7734	22.4124	21.8857	22.346	NaN	21.0026	21.5631	21.9933	21.5864	20.8247	21.7913	21.8809	21.0029	22.5215	24.0401	22.9968	21.504	22.2185	22.7184	23.5986	22.1934	22.3862	22.2068	22.2056
	0.96801	0.337384	O00560;O00560-2;O00560-3	O00560;O00560-2;O00560-3	Syntenin-1	SDCBP	Color2 [DarkGray]	1	4					4	4	4	28.9	28.9	28.9	32.444	0	62.834	539060000	117	23.8069	24.3342	23.55	23.2163	23.6165	24.1861	24.5276	23.9058	24.2018	23.6625	23.9148	23.483	23.5957	23.1617	22.9138	24.2069	22.8938	22.887	22.9911	23.5792	23.5599	23.0265	23.5883	24.4207	23.2849
	0.965714	-0.647964	Q03169	Q03169	Tumor necrosis factor alpha-induced protein 2	TNFAIP2	Color2 [DarkGray]	1	4					15	15	15	33.6	33.6	33.6	72.66	0	323.31	644130000	122	22.1336	21.2712	21.9	22.5683	23.5731	25.2885	23.5932	25.3297	22.5089	23.031	23.1284	23.7275	23.4206	22.0714	21.3558	25.3874	25.4755	24.215	22.8361	25.2034	23.5791	23.7149	25.1067	23.743	23.6865
	0.964777	0.472169	Q10588-2;Q10588	Q10588-2;Q10588	ADP-ribosyl cyclase/cyclic ADP-ribose hydrolase 2	BST1	Color2 [DarkGray]	1	4					4	4	4	20	20	20	29.326	0	7.7831	404820000	57	24.3737	23.0938	22.0243	23.4264	NaN	24.5245	23.1565	22.7712	25.0086	23.0152	23.6137	23.8665	23.6342	24.602	22.4465	23.0437	23.3279	24.1625	NaN	22.3784	23.6668	23.6146	NaN	22.4931	23.4772
	0.964688	0.450787	P49755	P49755	Transmembrane emp24 domain-containing protein 10	TMED10	Color2 [DarkGray]	1	4					4	4	4	22.4	22.4	22.4	24.976	0	13.886	584290000	81	23.8093	NaN	23.967	24.2715	24.1126	24.4469	23.3584	24.2526	22.874	23.4901	24.6071	21.9323	24.1819	24.4071	23.8553	23.7743	23.458	NaN	23.1647	23.861	23.5504	21.9811	23.2647	22.8191	22.6064
	0.960188	0.381017	P28838-2;P28838	P28838-2;P28838	Cytosol aminopeptidase	LAP3	Color2 [DarkGray]	1	4					20	20	20	62.1	62.1	62.1	52.771	0	323.31	31029000000	854	29.9443	29.0251	28.5885	29.4376	29.1191	30.5423	29.9041	30.89	28.5296	29.1615	28.7185	29.4609	30.2554	28.9598	28.973	28.9441	27.8911	30.6738	29.0279	29.9955	28.5026	28.6892	29.5482	29.3483	28.7562
	0.959336	-0.680655	P34913;P34913-3;P34913-2	P34913;P34913-3;P34913-2	Bifunctional epoxide hydrolase 2;Cytosolic epoxide hydrolase 2;Lipid-phosphate phosphatase	EPHX2	Color2 [DarkGray]	1	4					10	10	10	27.7	27.7	27.7	62.615	0	323.31	809210000	90	22.5385	24.5833	NaN	22.5477	24.2328	NaN	22.047	23.9911	22.1173	24.4608	22.8573	25.2193	22.5762	21.8833	24.7792	23.6798	21.1817	23.3657	23.6012	23.6934	NaN	25.3659	23.9456	24.5433	24.2978
	0.958515	0.358398	Q96C19;Q9BUP0-2;Q9BUP0	Q96C19	EF-hand domain-containing protein D2	EFHD2	Color2 [DarkGray]	1	4					6	6	6	23.3	23.3	23.3	26.697	0	323.31	5286400000	307	27.5505	26.5474	26.2152	27.1027	27.4651	27.2532	26.9634	27.7104	26.7872	26.9532	26.6882	27.4328	28.0047	26.8637	25.8255	25.9761	26.1981	27.5523	26.7561	26.3805	26.874	27.2449	26.8957	27.3321	26.376
	0.957244	0.656232	P32189-1;P32189-4;P32189-2;P32189;Q14409	P32189-1;P32189-4;P32189-2;P32189;Q14409	Glycerol kinase;Putative glycerol kinase 3	GK;GK3P	Color2 [DarkGray]	1	4					3	2	2	10.9	5.7	5.7	57.488	0	6.3038	300210000	33	23.8214	21.1142	NaN	22.8732	NaN	24.0917	24.2318	24.3365	24.131	21.9339	23.672	22.9047	23.5761	22.7046	20.8748	22.6947	21.1332	24.3841	22.6878	22.6243	22.0157	NaN	NaN	22.8043	21.1634
	0.954412	0.778355	P00738-2;P00738	P00738-2;P00738	Haptoglobin;Haptoglobin alpha chain;Haptoglobin beta chain	HP	Color2 [DarkGray]	1	4					10	10	8	44.4	44.4	37.5	38.451	0	323.31	26161000000	346	28.8314	26.4157	26.6274	30.6228	28.5558	28.1774	29.262	NaN	30.8209	29.039	30.717	29.7108	28.7655	30.4309	28.8959	28.2787	29.0885	26.6786	26.0683	27.642	29.6492	27.5332	28.8943	26.2214	28.2084
	0.953554	-0.30217	P27986;P27986-4;P27986-3;P27986-2;P27986-5;Q92569-3;Q92569-2;Q92569	P27986;P27986-4;P27986-3;P27986-2	Phosphatidylinositol 3-kinase regulatory subunit alpha	PIK3R1	Color2 [DarkGray]	1	4					8	8	7	17.8	17.8	16.3	83.597	0	14.781	576360000	87	23.7099	22.4434	24.3859	23.1095	24.3987	23.7548	23.6009	23.322	23.4357	23.4712	22.6677	24.1717	24.0194	23.2348	23.6647	23.6197	23.9144	22.9283	24.2227	24.4534	23.459	24.4371	23.3098	23.5806	24.234
	0.946888	0.890154	P06737-2;P06737	P06737-2;P06737	Glycogen phosphorylase, liver form	PYGL	Color2 [DarkGray]	1	4					15	12	11	28.7	22.9	21.5	93.133	0	234.75	1539100000	128	22.655	24.8097	22.3779	25.9702	23.6806	25.0608	26.1127	24.4291	26.2211	23.8843	24.6465	25.5241	26.5232	26.4455	22.8568	27.1249	25.706	21.8835	21.7486	23.899	24.9932	22.2886	21.7295	23.1809	24.581
	0.946805	0.436827	P26572	P26572	Alpha-1,3-mannosyl-glycoprotein 2-beta-N-acetylglucosaminyltransferase	MGAT1	Color2 [DarkGray]	1	4					2	2	2	8.1	8.1	8.1	50.878	0.0002739	5.0304	264920000	14	23.1528	NaN	NaN	NaN	NaN	24.1715	23.953	23.7111	23.1076	23.2215	23.9645	23.8271	22.9028	NaN	23.0709	NaN	NaN	NaN	NaN	NaN	23.3573	NaN	22.5088	23.0234	NaN
	0.945107	-0.257972	P55209-2;P55209	P55209-2;P55209	Nucleosome assembly protein 1-like 1	NAP1L1	Color2 [DarkGray]	1	4					12	12	4	64.1	64.1	25	42.761	0	196.12	4088200000	224	26.0922	25.4287	26.1327	25.6953	26.2731	25.7632	25.2728	25.8875	25.1015	26.6102	25.3904	27.2542	25.56	25.1769	26.3326	25.2695	26.0082	25.904	25.9789	26.197	26.3893	25.9958	26.8477	25.8809	26.2229
	0.943541	1.50845	P22897;P22897-2	P22897	Macrophage mannose receptor 1	MRC1	Color2 [DarkGray]	1	4					19	19	19	21.6	21.6	21.6	166.01	0	83.181	967750000	102	26.2419	NaN	NaN	22.1008	23.3395	23.6547	28.0493	NaN	25.9402	22.5368	26.4042	21.2753	NaN	27.3978	NaN	24.501	22.2419	NaN	NaN	23.803	25.0108	19.7101	NaN	NaN	NaN
	0.94252	0.466971	P42773	P42773	Cyclin-dependent kinase 4 inhibitor C	CDKN2C	Color2 [DarkGray]	1	4					2	2	2	12.5	12.5	12.5	18.127	0.0019277	2.9338	150510000	36	22.4689	23.3313	NaN	23.1661	23.1976	NaN	22.1828	NaN	21.6893	21.6841	21.9484	21.6826	21.9771	22.5591	21.6248	21.9857	NaN	22.8909	22.063	20.9783	22.4011	22.5343	NaN	21.7821	NaN
	0.941571	0.322109	O94973;O94973-2;O94973-3	O94973;O94973-2;O94973-3	AP-2 complex subunit alpha-2	AP2A2	Color2 [DarkGray]	1	4					23	23	18	40.1	40.1	32.6	103.96	0	268.1	2581100000	283	25.3708	25.8974	25.8247	25.4125	25.215	26.1786	26.5188	25.7266	26.3501	25.6329	26.342	25.5696	26.0361	27.452	26.3842	25.5039	25.456	25.7108	25.3088	26.3001	26.1663	25.6351	24.9675	24.8988	25.9222
	0.940587	0.330624	P30626;P30626-2;P30626-3	P30626;P30626-2;P30626-3	Sorcin	SRI	Color2 [DarkGray]	1	4					9	9	9	47	47	47	21.676	0	323.31	3150700000	151	26.3389	25.7168	25.6639	27.4324	26.2218	25.8202	26.4702	26.7554	26.0759	26.2278	26.2003	26.1277	26.0499	26.5728	26.1234	25.3649	25.184	26.3391	26.9395	25.3819	26.7822	26.4837	27.0152	26.8021	25.4007
	0.939721	-0.402996	Q13459;Q13459-2	Q13459;Q13459-2	Unconventional myosin-IXb	MYO9B	Color2 [DarkGray]	1	4					14	14	14	11.7	11.7	11.7	243.4	0	323.31	407280000	138	22.095	22.4868	23.2291	22.7723	23.5672	22.5285	21.3232	23.6075	21.6616	23.2747	22.2288	24.3038	23.8596	23.3732	23.1825	23.0451	21.6881	22.7315	23.4142	24.5779	22.8472	23.645	23.9105	22.3862	23.8167
	0.9377	-0.268348	Q96S97	Q96S97	Myeloid-associated differentiation marker	MYADM	Color2 [DarkGray]	1	4					2	2	2	10.2	10.2	10.2	35.273	0	166.86	1138100000	105	23.8088	23.7071	24.1572	24.2315	25.0568	NaN	24.0868	23.5658	25.2052	24.0492	24.5737	24.2109	24.1074	24.9901	24.5216	24.4928	24.8462	24.4424	24.0968	24.9175	24.8295	24.3067	23.8047	24.281	24.6811
	0.937676	0.473532	Q9Y2J2-2;Q9Y2J2-3;Q9Y2J2;Q9Y2J2-4	Q9Y2J2-2;Q9Y2J2-3;Q9Y2J2;Q9Y2J2-4	Band 4.1-like protein 3;Band 4.1-like protein 3, N-terminally processed	EPB41L3	Color2 [DarkGray]	1	4					9	9	9	17.6	17.6	17.6	96.513	0	211.5	654710000	87	23.8234	22.8716	22.8111	24.4689	23.4939	25.2708	24.4253	24.6822	25.4489	22.8386	24.1766	23.7233	25.3271	25.1352	23.7483	23.3321	23.5309	24.6635	22.7157	24.8066	24.1502	23.1897	NaN	21.7488	23.595
	0.93745	0.517106	Q8WWM9	Q8WWM9	Cytoglobin	CYGB	Color2 [DarkGray]	1	4					3	3	3	29.5	29.5	29.5	21.404	0	45.152	216510000	53	NaN	21.7202	NaN	23.4124	22.4993	23.4038	23.1212	NaN	22.6863	21.6439	23.4712	22.0879	23.9345	24.0156	21.9795	22.8169	22.695	23.771	21.8774	NaN	22.7943	20.8395	NaN	NaN	21.8439
	0.935131	-0.392527	P08579	P08579	U2 small nuclear ribonucleoprotein B	SNRPB2	Color2 [DarkGray]	1	4					3	2	2	20	16.4	16.4	25.486	0	80.979	397970000	47	23.5425	23.1757	22.8875	23.5858	23.1015	22.4915	22.7745	23.0917	22.4726	22.4922	21.9447	23.393	22.0931	22.2116	22.2228	23.0522	23.7544	22.534	23.0226	23.2485	25.7091	22.9852	24.0279	23.1694	21.8748
	0.933071	0.316933	O60488-2;O60488	O60488-2;O60488	Long-chain-fatty-acid--CoA ligase 4	ACSL4	Color2 [DarkGray]	1	4					6	6	5	17.2	17.2	14.5	74.435	0	11.038	301000000	50	23.1825	22.5819	23.2643	23.189	22.833	23.775	22.5181	23.0209	23.1813	22.2347	22.9921	23.4427	24.7978	23.2293	22.4947	21.9707	NaN	22.9514	NaN	23.3354	22.6254	22.2153	23.0393	NaN	22.8293
	0.931859	0.459793	P35637-2;P35637	P35637-2;P35637	RNA-binding protein FUS	FUS	Color2 [DarkGray]	1	4					5	5	4	14.3	14.3	14.3	53.354	0	21.994	1429500000	85	25.6765	25.6272	24.438	25.8083	25.2997	24.5112	25.2713	25.2045	24.7978	24.6953	24.4126	25.362	NaN	NaN	25.1465	22.5946	24.3567	24.8441	25.5674	24.9741	24.3348	22.7782	25.7741	25.643	25.1708
	0.931806	-0.501328	P43405-2;P43405	P43405-2;P43405	Tyrosine-protein kinase SYK	SYK	Color2 [DarkGray]	1	4					8	8	8	24.3	24.3	24.3	69.509	0	74.936	512560000	74	21.712	23.6488	23.8283	22.4554	23.7225	21.4284	22.5507	22.3765	23.1703	23.6037	23.6182	23.4709	23.8305	23.5612	24.4196	23.5706	20.716	23.7937	24.4207	25.5736	24.2795	23.0479	22.9118	22.8848	23.6319
	0.93123	-0.646041	P61619-3;P61619	P61619-3;P61619	Protein transport protein Sec61 subunit alpha isoform 1	SEC61A1	Color2 [DarkGray]	1	4					2	2	2	11.5	11.5	11.5	38.848	0	83.563	249490000	28	NaN	NaN	21.9777	NaN	NaN	21.9011	NaN	NaN	21.7379	21.4501	22.9042	23.2256	23.2391	22.0261	22.1698	23.1181	24.3425	NaN	NaN	22.6866	24.9066	NaN	NaN	NaN	22.2225
	0.927677	0.366782	O14744;O14744-5;O14744-2;O14744-3;O14744-4	O14744;O14744-5;O14744-2;O14744-3	Protein arginine N-methyltransferase 5;Protein arginine N-methyltransferase 5, N-terminally processed	PRMT5	Color2 [DarkGray]	1	4					9	9	9	25.3	25.3	25.3	72.683	0	21.2	352660000	71	23.4569	23.1275	24.3752	21.7872	23.9132	24.357	23.3047	23.0571	23.848	23.502	22.4517	23.7428	24.0763	23.1377	23.1531	NaN	23.6608	23.5285	NaN	23.0452	23.6287	23.5938	24.0454	21.1521	22.5836
	0.925743	-0.564967	O15260;O15260-2;O15260-3	O15260;O15260-2;O15260-3	Surfeit locus protein 4	SURF4	Color2 [DarkGray]	1	4					5	5	5	24.5	24.5	24.5	30.394	0	183.84	643090000	91	22.4668	NaN	23.2898	23.2021	21.0882	23.1517	22.9446	23.2291	23.5723	23.0024	23.6439	23.0731	22.3229	23.6021	22.9466	24.9185	25.5752	21.8274	NaN	24.3669	25.2223	22.889	22.8579	NaN	22.7011
	0.924425	-0.326448	Q8NC51-4;Q8NC51-3;Q8NC51-2;Q8NC51	Q8NC51-4;Q8NC51-3;Q8NC51-2;Q8NC51	Plasminogen activator inhibitor 1 RNA-binding protein	SERBP1	Color2 [DarkGray]	1	4					4	4	4	11.6	11.6	11.6	42.426	0	272	3895400000	214	26.0069	26.4519	26.1471	26.7366	27.156	26.0844	26.3464	26.495	25.7341	26.4962	26.1216	26.6285	26.664	23.9448	25.0292	25.6131	26.5353	26.633	27.0294	26.3323	26.2744	26.9584	26.4139	27.2353	26.6483
	0.922678	0.275492	Q9Y6I3-3;Q9Y6I3;Q9Y6I3-1	Q9Y6I3-3;Q9Y6I3;Q9Y6I3-1	Epsin-1	EPN1	Color2 [DarkGray]	1	4					7	7	7	29.1	29.1	29.1	57.504	0	276.19	2166600000	131	25.7286	25.8731	25.7094	25.7491	26.5166	25.6412	26.0439	25.4306	26.2323	25.2737	25.6426	25.3188	26.6882	25.2761	24.9648	25.6582	25.4339	26.3379	26.3863	24.7213	25.699	25.8245	25.6458	25.8293	25.6915
	0.920558	-0.273025	O43684-2;O43684	O43684-2;O43684	Mitotic checkpoint protein BUB3	BUB3	Color2 [DarkGray]	1	4					5	5	5	24.2	24.2	24.2	36.954	0	44.678	1261700000	113	24.4906	24.5678	NaN	25.1673	23.651	25.178	25.0038	24.8429	24.5765	25.2777	24.3705	25.5389	24.9655	24.2621	25.1227	24.7667	24.0897	24.6898	25.0855	25.2726	25.2852	25.3039	25.3199	25.5446	25.3678
	0.920205	-0.363617	Q9P107-2;Q9P107	Q9P107-2;Q9P107	GEM-interacting protein	GMIP	Color2 [DarkGray]	1	4					15	15	15	26.8	26.8	26.8	103.96	0	175.37	1104900000	188	23.0614	25.0297	25.4722	24.534	25.0684	24.1178	23.6447	24.7538	24.335	25.195	24.0002	25.1102	25.0114	22.4033	24.4874	24.3447	24.1883	24.9879	25.393	25.0498	24.8199	25.2629	24.6404	24.9641	25.3938
	0.919383	0.774637	P01011;P01011-2;P01011-3	P01011	Alpha-1-antichymotrypsin;Alpha-1-antichymotrypsin His-Pro-less	SERPINA3	Color2 [DarkGray]	1	4					13	13	13	43	43	43	47.65	0	323.31	14962000000	398	27.2198	26.3685	26.5193	29.5489	27.6243	28.2617	30.1581	25.4425	30.5912	27.9728	30.167	28.0163	28.6367	30.3366	26.9995	28.6332	28.4091	27.178	26.5284	26.0756	28.3988	26.7558	28.0886	25.9853	27.4259
	0.918066	-0.549671	Q8WWY3;Q8WWY3-4;Q8WWY3-2;Q8WWY3-3	Q8WWY3;Q8WWY3-4;Q8WWY3-2;Q8WWY3-3	U4/U6 small nuclear ribonucleoprotein Prp31	PRPF31	Color2 [DarkGray]	1	4					8	8	8	25.3	25.3	25.3	55.455	0	42.287	748430000	57	NaN	24.0532	NaN	23.0283	24.0872	23.7595	22.8742	23.1211	23.2904	23.1269	23.0477	23.8172	22.7541	22.5511	23.2199	25.4961	27.2895	24.0341	23.5778	23.258	NaN	NaN	23.0122	NaN	23.9362
	0.917038	0.953938	Q99584	Q99584	Protein S100-A13	S100A13	Color2 [DarkGray]	1	4					4	4	4	50	50	50	11.471	0	323.31	2015600000	58	24.7004	NaN	25.341	26.1129	26.2947	25.7662	26.6235	26.0455	25.2949	25.9968	25.1225	27.139	24.8342	24.0714	24.1675	25.0414	24.7499	26.7579	26.1129	20.6181	24.0369	28.3772	NaN	26.0382	25.1385
	0.91694	0.287226	P35754	P35754	Glutaredoxin-1	GLRX	Color2 [DarkGray]	1	4					7	7	7	83	83	83	11.776	0	276.4	7562700000	173	27.9313	27.9778	27.5339	27.7647	27.726	27.4191	28.0128	27.9094	27.3222	26.875	27.1951	27.2271	27.7136	27.3493	26.6674	27.8536	27.0726	27.9059	27.4296	26.9127	27.5287	27.0011	28.0012	28.0605	27.4861
	0.915716	-0.238806	Q13043;Q13043-2	Q13043;Q13043-2	Serine/threonine-protein kinase 4;Serine/threonine-protein kinase 4 37kDa subunit;Serine/threonine-protein kinase 4 18kDa subunit	STK4	Color2 [DarkGray]	1	4					13	13	9	32.9	32.9	21.8	55.63	0	201.06	3070300000	315	25.6883	25.8928	26.6842	26.1736	26.5553	25.2164	25.5357	25.9672	25.6575	26.4712	25.3777	25.997	25.8441	25.3084	26.2986	26.1056	25.8259	26.0653	26.5656	26.1754	25.5817	26.7133	26.4788	26.4992	26.3155
	0.914338	-0.515944	P14174	P14174	Macrophage migration inhibitory factor	MIF	Color2 [DarkGray]	1	4					3	3	3	35.7	35.7	35.7	12.476	0	65.809	23135000000	378	29.6972	28.6983	27.0212	26.2011	29.2342	27.4205	28.6702	29.3368	29.5538	29.474	29.6903	26.3148	27.1681	28.865	28.5159	29.5382	28.842	29.0861	29.1884	28.062	28.8732	28.6343	29.4436	29.5068	29.045
	0.913973	0.184387	P35232;P35232-2	P35232;P35232-2	Prohibitin	PHB	Color2 [DarkGray]	1	4					12	12	12	68.4	68.4	68.4	29.804	0	323.31	11511000000	372	27.6817	28.3864	28.5021	28.0416	27.9146	28.167	28.7666	28.0134	27.6656	27.9242	28.3212	27.9854	28.316	28.1458	28.4522	28.0618	27.877	28.0622	27.9507	28.4248	27.5308	27.9008	27.5135	27.864	27.6025
	0.912796	0.340264	Q9Y5K8	Q9Y5K8	V-type proton ATPase subunit D	ATP6V1D	Color2 [DarkGray]	1	4					6	6	6	37.2	37.2	37.2	28.262	0	164.1	593490000	81	24.9161	23.2812	23.6392	22.8327	NaN	24.8459	24.2978	24.7168	23.0208	23.7957	23.5621	24.3227	24.5483	24.3603	24.1263	22.9189	23.3629	24.2622	24.1174	24.5659	22.8096	23.6847	NaN	24.1107	23.2825
	0.912346	0.462461	Q02083;Q02083-2;Q02083-3	Q02083;Q02083-2	N-acylethanolamine-hydrolyzing acid amidase;N-acylethanolamine-hydrolyzing acid amidase subunit alpha;N-acylethanolamine-hydrolyzing acid amidase subunit beta	NAAA	Color2 [DarkGray]	1	4					4	4	4	17	17	17	40.066	0	323.31	684760000	99	24.1	25.8981	22.9362	25.0594	23.2747	24.0285	24.7239	24.1856	23.7158	23.198	23.7177	22.8954	25.6804	23.0448	23.1601	22.5542	24.3412	24.2738	24.2032	23.7332	22.9094	22.0684	23.7233	24.2082	24.2031
	0.91176	-0.719997	Q9NRX4-2;Q9NRX4	Q9NRX4-2;Q9NRX4	14 kDa phosphohistidine phosphatase	PHPT1	Color2 [DarkGray]	1	4					2	2	2	20.2	20.2	20.2	13.671	0	59.675	6132600000	111	27.4842	27.4311	25.7687	23.9787	27.3541	27.3793	27.9029	27.5675	26.8963	27.2539	24.0421	24.164	26.7642	23.1416	24.2334	NaN	25.3108	27.5372	27.5779	26.6814	27.5388	27.4449	25.8075	28.1125	27.665
	0.910018	0.349554	Q96FQ6	Q96FQ6	Protein S100-A16	S100A16	Color2 [DarkGray]	1	4					2	2	2	29.1	29.1	29.1	11.801	0	72.704	424940000	40	24.4091	22.655	23.7894	23.1793	23.0806	23.7987	NaN	23.8283	24.1958	23.5032	23.9288	NaN	24.2093	23.6794	22.813	23.5642	23.6487	23.0824	22.1811	23.0219	24.7834	NaN	23.1006	23.5922	23.8757
	0.90938	-0.291039	P53990-2;P53990-3;P53990;P53990-4;P53990-5;P53990-6	P53990-2;P53990-3;P53990;P53990-4;P53990-5;P53990-6	IST1 homolog	IST1	Color2 [DarkGray]	1	4					5	5	5	24.5	24.5	24.5	36.622	0	122.74	512210000	100	23.1204	24.0846	23.61	22.887	23.6361	21.4973	22.9898	23.44	23.2458	23.6589	23.3807	23.9702	22.4809	23.3983	23.109	25.1521	23.1399	23.0116	22.9838	23.6217	23.4777	23.7708	23.1804	23.8908	23.8471
	0.909217	-0.304201	Q15029-2;Q15029;Q15029-3	Q15029-2;Q15029;Q15029-3	116 kDa U5 small nuclear ribonucleoprotein component	EFTUD2	Color2 [DarkGray]	1	4					23	23	23	38.5	38.5	38.5	105.38	0	323.31	2743000000	404	23.3322	25.804	26.3308	25.7975	26.0122	25.871	25.413	25.5916	25.2087	25.9274	25.5842	26.4604	25.7435	25.2548	26.1129	26.5288	26.0349	24.9068	25.3978	26.5334	25.8082	25.8338	25.8095	25.2507	26.3136
	0.907418	0.253324	P16284-5;P16284-3;P16284-4;P16284-2;P16284-6;P16284	P16284-5;P16284-3;P16284-4;P16284-2;P16284-6;P16284	Platelet endothelial cell adhesion molecule	PECAM1	Color2 [DarkGray]	1	4					4	4	4	10.2	10.2	10.2	79.246	0	48.658	186760000	50	21.6739	22.4556	21.989	22.0705	22.232	22.81	22.3153	22.2884	22.8054	NaN	21.8148	NaN	23.1314	22.9257	22.5385	23.0109	22.5092	22.3615	21.8593	22.3872	22.0844	21.9727	21.9066	21.7253	22.321
	0.906276	-0.563154	Q9UPU5	Q9UPU5	Ubiquitin carboxyl-terminal hydrolase 24	USP24	Color2 [DarkGray]	1	4					13	13	13	8.2	8.2	8.2	294.36	0	71.657	165400000	51	NaN	22.0255	23.0747	20.9381	22.4348	NaN	NaN	21.2135	NaN	21.1699	NaN	21.8718	21.7526	21.9889	23.2533	21.6628	NaN	NaN	NaN	23.4958	22.3233	21.9126	22.1403	NaN	22.2946
	0.905534	-0.438462	Q9BTV4	Q9BTV4	Transmembrane protein 43	TMEM43	Color2 [DarkGray]	1	4					8	8	8	36.2	36.2	36.2	44.875	0	56.95	1296500000	99	23.1108	23.3504	25.761	23.9999	23.9398	23.6791	24.0034	24.5194	24.8354	25.2696	25.1913	25.3331	24.3584	23.7354	25.2344	24.8914	25.7618	23.8418	24.4476	25.8776	25.4913	24.4508	23.9951	23.5776	25.3877
	0.903558	0.248258	Q8NFH5-2;Q8NFH5	Q8NFH5-2;Q8NFH5	Nucleoporin NUP53	NUP35	Color2 [DarkGray]	1	4					2	2	2	12	12	12	33.12	0	38.104	469730000	39	NaN	24.217	24.5249	24.4079	23.5797	23.5114	24.1678	NaN	NaN	23.6798	24.2444	24.0767	NaN	NaN	23.5238	NaN	22.7368	24.0309	24.5296	23.8036	23.4925	23.8925	23.5843	24.2102	23.4568
	0.902913	-0.537117	P02743	P02743	Serum amyloid P-component;Serum amyloid P-component(1-203)	APCS	Color2 [DarkGray]	1	4					4	4	4	20.6	20.6	20.6	25.387	0	261.34	1458800000	88	24.0705	23.0202	24.9845	25.5686	24.4219	24.8998	23.6821	NaN	25.9156	25.3657	24.8621	24.0096	22.9498	24.9317	24.075	25.1623	25.718	25.0542	23.8012	23.5445	25.9969	25.2562	24.548	23.6213	24.4566
	0.902394	0.56665	Q9BX59;Q9BX59-2;Q9BX59-7;Q9BX59-3;Q9BX59-5;Q9BX59-4;Q9BX59-6	Q9BX59;Q9BX59-2;Q9BX59-7;Q9BX59-3;Q9BX59-5;Q9BX59-4;Q9BX59-6	Tapasin-related protein	TAPBPL	Color2 [DarkGray]	1	4					6	6	6	26.5	26.5	26.5	50.182	0	11.762	196870000	27	23.4569	22.0607	22.9097	23.1779	NaN	22.9426	23.4064	NaN	22.2507	NaN	23.3753	23.1145	23.26	NaN	22.7247	22.7397	NaN	NaN	19.6275	23.1937	NaN	21.0544	NaN	NaN	22.7911
	0.902118	0.375764	P09110;P09110-2	P09110;P09110-2	3-ketoacyl-CoA thiolase, peroxisomal	ACAA1	Color2 [DarkGray]	1	4					11	11	11	42.5	42.5	42.5	44.292	0	323.31	1008000000	135	23.7447	24.4608	25.3945	24.0571	23.7796	25.0802	24.8668	25.4404	24.0993	24.0345	24.5522	23.9052	25.38	24.9293	24.1831	25.1725	24.822	24.5469	23.3901	25.8715	24.5415	23.8418	23.5002	24.976	23.3709
	0.898317	-0.478496	P02647;CON__P15497	P02647	Apolipoprotein A-I;Proapolipoprotein A-I;Truncated apolipoprotein A-I	APOA1	Color2 [DarkGray]	1	4					14	14	14	43.8	43.8	43.8	30.777	0	323.31	17850000000	519	27.447	27.529	27.5408	28.217	26.9423	27.5055	26.9316	27.6566	29.3207	28.1356	28.8691	28.1237	28.5181	27.9935	28.1574	30.0081	29.3324	26.9786	27.1969	27.7797	28.7074	27.557	28.1831	27.4518	28.0151
	0.894862	-0.294595	Q01082;Q01082-2	Q01082;Q01082-2	Spectrin beta chain, non-erythrocytic 1	SPTBN1	Color2 [DarkGray]	1	4					47	47	3	31.2	31.2	2.2	274.61	0	323.31	10752000000	962	27.2135	27.9949	27.8565	27.9988	28.3132	27.5681	27.2982	27.2663	26.9196	28.2389	27.4238	27.9742	27.2559	27.8373	28.6823	27.7999	27.8235	27.6103	28.456	28.1331	28.0538	28.1163	27.314	27.3192	28.7072
	0.892671	0.955498	Q07954	Q07954	Prolow-density lipoprotein receptor-related protein 1;Low-density lipoprotein receptor-related protein 1 85 kDa subunit;Low-density lipoprotein receptor-related protein 1 515 kDa subunit;Low-density lipoprotein receptor-related protein 1 intracellular domain	LRP1	Color2 [DarkGray]	1	4					33	33	33	11.3	11.3	11.3	504.6	0	323.31	2445500000	287	25.1096	NaN	21.2498	24.8497	24.5555	26.2167	26.3608	25.771	27.8358	25.2529	26.0276	25.5306	26.5269	27.1592	23.5743	25.2277	27.293	25.9368	22.3103	24.9909	27.1818	23.7577	22.7223	20.1763	25.0153
	0.892026	-0.31442	Q9Y2I8-2;Q9Y2I8;Q9Y2I8-3	Q9Y2I8-2;Q9Y2I8;Q9Y2I8-3	WD repeat-containing protein 37	WDR37	Color2 [DarkGray]	1	4					3	3	3	8.3	8.3	8.3	54.793	0	156.13	613060000	154	22.679	24.6364	23.9279	22.9785	23.9609	22.8503	22.8349	23.3243	23.0332	23.3978	23.0574	23.3687	23.4448	22.7462	23.3617	25.536	24.0243	23.4801	23.9305	23.9898	23.0482	23.7532	23.2785	23.4483	24.3951
	0.890459	-0.312126	Q9Y265;Q9Y265-2	Q9Y265;Q9Y265-2	RuvB-like 1	RUVBL1	Color2 [DarkGray]	1	4					10	10	10	36.6	36.6	36.6	50.227	0	122.5	2249300000	182	25.6823	25.8212	26.1046	22.8056	25.9406	25.9163	25.5328	25.3099	24.7696	25.8669	25.3809	26.1584	25.3994	25.5982	26.005	25.4784	26.2795	24.8619	25.6784	25.8841	25.963	25.8347	25.6003	25.278	26.024
	0.888808	0.437107	P62854;Q5JNZ5	P62854;Q5JNZ5	40S ribosomal protein S26;Putative 40S ribosomal protein S26-like 1	RPS26;RPS26P11	Color2 [DarkGray]	1	4					2	2	2	19.1	19.1	19.1	13.015	0	67.319	2067400000	133	25.9541	26.2669	26.7962	26.1878	25.7101	25.4873	25.514	25.8604	24.9166	25.585	24.8182	25.0156	25.9459	25.5376	26.1802	24.3992	25.3195	21.6475	26.4839	25.7453	25.0722	25.2126	25.7022	26.826	25.6318
	0.888711	-0.320176	Q8N163-2;Q8N163	Q8N163-2;Q8N163	Cell cycle and apoptosis regulator protein 2	CCAR2	Color2 [DarkGray]	1	4					20	20	20	37.1	37.1	37.1	103.14	0	294.5	3271000000	305	26.1057	25.9116	26.654	26.396	26.6661	25.6475	26.2108	25.9176	24.8177	26.2805	25.622	26.6075	25.8211	24.6933	26.5931	26.3703	25.7345	24.4616	25.9453	26.8392	26.2166	25.8613	26.6521	26.2635	26.8435
	0.885481	0.25543	Q92882	Q92882	Osteoclast-stimulating factor 1	OSTF1	Color2 [DarkGray]	1	4					6	6	6	49.1	49.1	49.1	23.787	0	155.4	2633900000	156	25.7681	26.4034	26.2057	26.2054	25.2405	25.9291	26.5761	26.4566	25.9921	25.8889	26.1006	25.9707	25.5847	26.0879	26.4595	23.8394	25.7423	26.3373	26.1466	26.1864	25.8212	25.5907	25.7436	26.3198	25.6877
	0.88523	-0.411037	Q9UBN7-2;Q9UBN7	Q9UBN7-2;Q9UBN7	Histone deacetylase 6	HDAC6	Color2 [DarkGray]	1	4					3	3	3	5.8	5.8	5.8	114.36	0	54.272	231020000	36	NaN	21.8512	22.3578	21.9065	23.0392	23.0203	21.7113	NaN	21.804	22.4756	22.4207	23.1149	21.3988	NaN	23.457	21.4837	21.685	NaN	21.7788	22.9141	23.8252	23.2465	22.3934	22.6394	23.1189
	0.884288	0.249409	P62913-2;P62913	P62913-2;P62913	60S ribosomal protein L11	RPL11	Color2 [DarkGray]	1	4					3	3	3	27.7	27.7	27.7	20.124	0	148.34	7080100000	91	27.2205	26.9791	28.4157	27.1857	27.5897	27.8919	27.4484	27.494	27.2015	27.2744	26.8673	26.8478	27.8042	27.8283	28.241	26.0962	26.697	27.5077	27.825	27.6618	27.1681	28.0504	27.3571	27.642	27.1491
	0.884114	0.427086	P55957;P55957-2;P55957-4;P55957-3	P55957;P55957-2;P55957-4	BH3-interacting domain death agonist;BH3-interacting domain death agonist p15;BH3-interacting domain death agonist p13;BH3-interacting domain death agonist p11	BID	Color2 [DarkGray]	1	4					6	6	6	53.3	53.3	53.3	21.994	0	323.31	4107900000	194	27.5693	26.1502	26.067	26.7338	26.6316	27.2269	27.5462	27.0096	26.7334	25.6834	26.5513	25.4798	27.3037	26.0179	25.5025	26.773	24.8002	27.4286	26.0754	26.2853	26.0906	25.4768	26.456	27.0795	25.7073
	0.882794	-0.550719	Q9NX55	Q9NX55	Huntingtin-interacting protein K	HYPK	Color2 [DarkGray]	1	4					5	5	5	42.6	42.6	42.6	14.665	0	323.31	889790000	85	24.4366	24.152	23.5292	23.2371	24.286	23.7731	23.909	22.9326	23.158	23.2777	23.8679	23.0642	20.2249	22.9463	22.2021	25.6067	24.8574	23.9237	23.5051	22.8531	NaN	24.3955	24.213	24.1294	24.6853
	0.882404	-0.239985	Q5VYK3	Q5VYK3	Proteasome-associated protein ECM29 homolog	ECM29	Color2 [DarkGray]	1	4					22	22	22	19.7	19.7	19.7	204.29	0	215.33	714200000	169	23.5416	24.7022	24.0664	23.668	23.932	24.7565	23.8073	24.1343	23.2453	23.6539	23.4977	24.2496	23.811	23.6027	23.0041	23.7706	24.8132	23.9815	23.7741	24.8737	24.6353	23.6138	23.716	23.7293	24.2325
	0.881924	-0.390621	A5YKK6-2;A5YKK6;A5YKK6-3;A5YKK6-4	A5YKK6-2;A5YKK6;A5YKK6-3	CCR4-NOT transcription complex subunit 1	CNOT1	Color2 [DarkGray]	1	4					14	14	14	8.2	8.2	8.2	266.38	0	128.12	460640000	142	21.8703	22.8474	23.9725	23.4665	24.0349	23.472	21.3456	23.1707	21.2125	23.7528	22.4816	24.0992	23.3817	23.0654	23.6573	NaN	23.7423	23.7821	23.81	23.7838	23.1719	23.903	22.9102	23.1414	24.1297
	0.881035	0.217404	P25398	P25398	40S ribosomal protein S12	RPS12	Color2 [DarkGray]	1	4					6	6	6	62.1	62.1	62.1	14.515	0	323.31	36776000000	316	29.9874	29.4663	29.1345	30.1294	29.6126	29.374	29.4023	28.6316	29.1767	28.8746	29.3169	28.7615	29.7352	29.9259	29.671	28.4486	28.4661	29.5668	29.4189	28.9087	29.5761	29.4786	29.6638	29.6513	28.8069
	0.878882	-0.365984	Q15555-5;Q15555-4;Q15555-3;Q15555;Q15555-2	Q15555-5;Q15555-4;Q15555-3;Q15555;Q15555-2	Microtubule-associated protein RP/EB family member 2	MAPRE2	Color2 [DarkGray]	1	4					6	6	6	33.8	33.8	33.8	32.236	0	96.209	209560000	36	21.7365	NaN	23.355	22.3097	22.7416	21.662	NaN	23.0694	22.0012	23.3602	21.6202	22.7816	22.9464	22.2227	23.7377	NaN	NaN	22.104	22.3692	22.8909	22.3672	23.6836	22.9411	22.7044	NaN
	0.875791	0.290046	O75964	O75964	ATP synthase subunit g, mitochondrial	ATP5L	Color2 [DarkGray]	1	4					3	3	3	28.2	28.2	28.2	11.428	0.0068192	2.1065	449530000	22	24.3159	23.4574	24.8542	24.1331	NaN	NaN	24.2344	NaN	23.332	23.6583	24.254	23.5192	24.2407	NaN	24.5731	23.5358	NaN	NaN	NaN	24.6235	NaN	24.0566	23.6303	NaN	23.2764
	0.871061	-0.483748	Q9NPH2;Q9NPH2-3;Q9NPH2-2	Q9NPH2;Q9NPH2-3;Q9NPH2-2	Inositol-3-phosphate synthase 1	ISYNA1	Color2 [DarkGray]	1	4					5	5	5	15.2	15.2	15.2	61.067	0	154.78	422400000	59	22.2836	21.9217	21.7157	21.6519	23.719	21.8364	NaN	23.0917	22.5484	23.597	23.6158	22.1075	23.4209	23.27	23.3538	23.3346	22.7652	22.0711	21.666	21.6967	22.5815	23.7203	22.8218	23.7931	24.4047
	0.870997	0.171513	P09525	P09525	Annexin A4	ANXA4	Color2 [DarkGray]	1	4					13	13	4	48.6	48.6	20.4	35.882	0	323.31	6077600000	427	27.5653	27.1067	26.7189	27.0035	27.1202	27.2712	27.5436	27.1383	27.521	26.7613	27.3405	27.0875	26.8782	27.5909	27.0044	28.0949	26.8992	27.1174	26.7488	26.3141	27.2232	27.0633	26.7691	26.6352	26.6871
	0.870393	0.299744	P11021	P11021	78 kDa glucose-regulated protein	HSPA5	Color2 [DarkGray]	1	4					21	20	20	39.3	39.3	39.3	72.332	0	323.31	38775000000	824	29.7088	28.7664	29.0484	29.8605	29.3724	30.1493	30.8103	29.9091	30.1069	29.4134	30.07	29.8458	30.2142	30.8653	29.5893	29.7228	29.4854	29.3714	28.6594	29.9507	29.8975	29.1898	29.2585	28.418	29.4687
	0.869859	0.233706	P42126;P42126-2	P42126;P42126-2	Enoyl-CoA delta isomerase 1, mitochondrial	ECI1	Color2 [DarkGray]	1	4					5	5	5	26.2	26.2	26.2	32.816	0	286.4	2205800000	166	26.1334	25.4615	25.7145	24.8492	25.7963	25.6471	25.7604	25.4821	25.2249	25.1373	25.649	25.253	25.6767	26.1488	25.2953	24.9735	25.7816	26.0211	25.2113	23.767	25.3757	25.7823	25.414	24.9809	24.7292
	0.869472	0.253652	O75608-2;O75608	O75608-2;O75608	Acyl-protein thioesterase 1	LYPLA1	Color2 [DarkGray]	1	4					4	4	4	34.6	34.6	34.6	22.875	0	37.548	1493700000	88	25.4976	26.4407	25.2871	24.7973	25.0047	24.8141	25.3027	25.0477	25.0315	25.2661	24.9256	25.3094	25.0909	NaN	24.8356	26.0254	25.0771	25.3629	25.2497	24.925	25.5378	25.2816	23.4984	25.0497	25.0754
	0.869192	0.720648	P02746	P02746	Complement C1q subcomponent subunit B	C1QB	Color2 [DarkGray]	1	4					4	4	4	27.3	27.3	27.3	26.721	0	323.31	2257300000	115	25.8908	22.9909	22.658	25.7005	23.736	26.6287	27.1861	26.6653	25.7271	24.3029	26.3748	23.4343	28.549	25.5997	24.0593	24.8893	24.6161	25.7676	22.3425	25.8349	24.6074	24.3812	23.364	24.6241	23.8774
	0.868952	1.00771	P15144	P15144	Aminopeptidase N	ANPEP	Color2 [DarkGray]	1	4					18	18	18	30.7	30.7	30.7	109.54	0	323.31	1777500000	179	24.6044	23.5156	22.8904	23.5855	24.1004	26.323	26.2811	23.4269	28.2126	24.203	26.4055	25.1116	24.5644	28.4593	23.0354	25.14	25.5768	24.8768	NaN	22.295	25.693	24.1118	22.4602	23.5537	24.7304
	0.861451	-0.509646	Q14254	Q14254	Flotillin-2	FLOT2	Color2 [DarkGray]	1	4					8	8	8	26.4	26.4	26.4	47.064	0	217.07	780290000	71	22.2417	NaN	24.2671	22.7852	23.239	23.3494	22.2478	23.5696	23.1893	23.8826	NaN	23.0062	NaN	23.5901	24.4287	26.6931	24.4128	23.1169	24.5241	23.3636	22.3941	23.5003	NaN	22.5742	23.7025
	0.86107	0.692632	P01009;P01009-2;P01009-3	P01009;P01009-2;P01009-3	Alpha-1-antitrypsin;Short peptide from AAT	SERPINA1	Color2 [DarkGray]	1	4					15	15	15	51.2	51.2	51.2	46.736	0	323.31	23134000000	536	28.4667	27.0076	26.9113	29.5961	28.2379	28.7093	29.0732	27.6132	30.5547	28.9694	31.2048	28.9573	29.6702	30.2145	28.309	29.8153	29.2943	27.1806	26.6169	26.6385	29.8269	27.6009	28.5018	25.1253	28.1125
	0.858999	-0.541939	Q01780-2;Q01780	Q01780-2;Q01780	Exosome component 10	EXOSC10	Color2 [DarkGray]	1	4					5	5	5	8.3	8.3	8.3	98.088	0	52.854	107920000	40	NaN	20.6166	22.3919	21.1234	21.3302	21.7603	20.767	NaN	NaN	21.2377	NaN	19.0681	NaN	NaN	21.2995	22.7004	23.7138	NaN	NaN	22.1199	NaN	NaN	21.0697	NaN	21.4052
	0.85745	-0.36602	Q15386	Q15386	Ubiquitin-protein ligase E3C	UBE3C	Color2 [DarkGray]	1	4					4	4	4	5.9	5.9	5.9	123.92	0	12.027	179640000	47	21.8724	NaN	22.606	21.744	22.8902	NaN	NaN	21.7383	NaN	NaN	21.6338	23.1929	22.32	21.8141	21.6854	22.2931	23.5906	22.5421	23.2211	22.5111	NaN	22.9895	NaN	21.8765	22.9258
	0.856145	0.504026	O75251;O75251-2	O75251;O75251-2	NADH dehydrogenase [ubiquinone] iron-sulfur protein 7, mitochondrial	NDUFS7	Color2 [DarkGray]	1	4					3	3	3	23.5	23.5	23.5	23.563	0	47.481	408110000	47	24.2837	22.4797	24.0238	25.6606	NaN	22.9908	23.0273	22.9553	22.7886	23.0204	23.4939	22.2231	23.2189	23.7568	24.1754	21.6163	22.116	22.4557	NaN	24.6782	NaN	NaN	22.2971	23.1694	21.6904
	0.855671	-0.444396	P36915;P36915-2	P36915;P36915-2	Guanine nucleotide-binding protein-like 1	GNL1	Color2 [DarkGray]	1	4					8	8	8	20.4	20.4	20.4	68.66	0	87.723	533010000	77	NaN	23.2202	24.118	23.1353	23.4924	22.4472	NaN	22.9234	NaN	24.7274	22.7261	23.5701	22.6437	NaN	23.7839	NaN	24.9758	22.6632	24.8091	24.0583	NaN	22.8828	23.4408	24.1558	23.9835
	0.855384	-0.346286	Q96RT1-7;Q96RT1-6;Q96RT1-4;Q96RT1-5;Q96RT1-3;Q96RT1-9;Q96RT1-2;Q96RT1;Q96RT1-8;Q96NW7-3;Q96NW7-2;Q96NW7	Q96RT1-7;Q96RT1-6;Q96RT1-4;Q96RT1-5;Q96RT1-3;Q96RT1-9;Q96RT1-2;Q96RT1;Q96RT1-8	Protein LAP2	ERBB2IP	Color2 [DarkGray]	1	4					6	6	6	7.7	7.7	7.7	146.08	0	42.567	369570000	63	23.0328	22.4935	23.9614	22.8961	22.7923	22.9741	NaN	23.4117	22.7265	23.6402	22.2175	23.0257	23.0424	NaN	22.0511	24.5526	21.8923	22.3863	NaN	23.4984	23.3688	23.8308	23.1437	22.8902	23.7297
	0.855308	-0.391016	P23193;P23193-2	P23193;P23193-2	Transcription elongation factor A protein 1	TCEA1	Color2 [DarkGray]	1	4					3	3	3	16.6	16.6	16.6	33.969	0	160.55	764140000	54	23.8916	23.6884	24.4607	23.6311	NaN	NaN	24.1063	24.2006	22.6315	25.1715	23.9035	24.3268	24.1279	23.5506	25.1721	23.6351	23.1626	23.3321	23.9076	25.162	NaN	23.2295	24.7036	24.1988	25.3145
	0.85516	-0.174249	Q96P70	Q96P70	Importin-9	IPO9	Color2 [DarkGray]	1	4					8	8	8	15.2	15.2	15.2	115.96	0	300.36	2021000000	154	25.397	25.3208	25.5578	25.5514	26.3578	25.2803	24.9117	25.0597	25.5214	25.5797	25.0833	25.7284	25.2591	25.2506	25.3553	25.2282	25.701	25.8332	25.2107	25.3377	26.0022	25.9527	25.6616	25.2253	26.0898
	0.851203	-0.426368	P08243;P08243-2;P08243-3	P08243;P08243-2;P08243-3	Asparagine synthetase [glutamine-hydrolyzing]	ASNS	Color2 [DarkGray]	1	4					4	4	4	12.1	12.1	12.1	64.369	0	27.059	107030000	62	NaN	21.8461	20.7825	22.1403	21.0925	21.8647	21.3011	20.5241	19.8783	21.1769	21.0146	21.5527	20.7976	NaN	20.7449	22.2822	22.4918	NaN	20.7518	21.4539	20.7397	21.2614	21.8349	21.018	21.3627
	0.850545	-0.260527	Q9Y224	Q9Y224	UPF0568 protein C14orf166	C14orf166	Color2 [DarkGray]	1	4					9	9	9	45.5	45.5	45.5	28.068	0	323.31	1794800000	275	24.4203	26.4345	25.0892	25.2329	24.3467	24.894	24.7636	24.8939	24.6593	25.0445	24.8471	25.332	24.6799	24.2428	24.915	25.8983	26.5123	24.1436	24.6732	25.1913	25.6383	25.2152	25.3709	25.1523	25.5393
	0.849794	-0.315775	Q9UID3;Q9UID3-2	Q9UID3;Q9UID3-2	Vacuolar protein sorting-associated protein 51 homolog	VPS51	Color2 [DarkGray]	1	4					8	8	8	19.3	19.3	19.3	86.041	0	103.73	333670000	72	21.731	24.1087	23.2755	21.5486	23.3525	22.3296	22.3949	22.1943	22.3624	22.4137	22.1433	23.2468	22.6196	22.7454	22.8093	24.5671	23.1438	22.4524	22.7086	23.5965	23.2874	23.0352	22.36	22.9384	23.2247
	0.846767	-0.257034	Q99733;Q99733-2	Q99733;Q99733-2	Nucleosome assembly protein 1-like 4	NAP1L4	Color2 [DarkGray]	1	4					9	9	9	46.1	46.1	46.1	42.823	0	323.31	4820400000	382	27.1195	26.1359	25.9002	25.9233	26.5518	25.263	26.0341	26.7148	25.3973	26.9844	26.2842	27.5009	26.1138	25.6559	26.2563	26.3179	26.2608	25.7304	26.449	26.354	25.7797	27.0002	27.0971	26.4829	26.4966
	0.846383	0.434322	Q96AZ6;Q96AZ6-2	Q96AZ6	Interferon-stimulated gene 20 kDa protein	ISG20	Color2 [DarkGray]	1	4					5	5	5	38.1	38.1	38.1	20.363	0	279.05	2319100000	112	25.1398	26.5605	26.3492	26.4473	26.475	25.8208	25.7088	26.4281	NaN	26.2262	24.3147	25.0735	24.9035	NaN	25.9647	25.0053	25.3478	26.3011	26.8688	24.8867	24.6165	26.1067	25.6782	26.6847	25.9008
	0.844605	0.794702	Q9NZN4;Q9NZN4-2	Q9NZN4;Q9NZN4-2	EH domain-containing protein 2	EHD2	Color2 [DarkGray]	1	4					11	11	11	35	35	35	61.161	0	73.809	616280000	101	NaN	NaN	23.2888	22.8472	NaN	25.085	23.1124	NaN	23.8689	23.5032	23.5261	23.7459	23.5629	25.0133	25.4441	22.8021	25.4204	21.4467	22.7786	23.3708	23.3487	19.3575	NaN	NaN	23.5736
	0.843991	0.223613	P30050;P30050-2	P30050;P30050-2	60S ribosomal protein L12	RPL12	Color2 [DarkGray]	1	4					6	6	6	45.5	45.5	45.5	17.818	0	323.31	19614000000	332	29.6178	29.2442	29.0012	29.2908	29.379	28.674	28.805	28.9465	28.9179	28.6105	28.4772	28.2952	29.2111	29.1387	28.7994	27.9819	28.1862	29.3147	29.3997	28.6878	28.2441	29.4347	29.0197	29.3082	29.0467
	0.842685	-0.451851	Q9H2U1-3;Q9H2U1-2;Q9H2U1	Q9H2U1-3;Q9H2U1-2;Q9H2U1	ATP-dependent RNA helicase DHX36	DHX36	Color2 [DarkGray]	1	4					5	5	5	6.5	6.5	6.5	111.48	0	19.724	139480000	42	20.9113	21.6254	21.4227	21.6673	NaN	20.8178	20.7018	20.6829	NaN	21.2002	NaN	20.7071	NaN	NaN	20.8092	23.9276	23.4055	20.9936	21.3592	21.8438	20.9324	NaN	21.1338	NaN	21.5459
	0.841559	0.477587	Q99952-2;Q99952	Q99952-2;Q99952	Tyrosine-protein phosphatase non-receptor type 18	PTPN18	Color2 [DarkGray]	1	4					2	2	2	14.4	14.4	14.4	38.475	0	132.09	470570000	38	24.8229	NaN	23.4559	23.442	NaN	23.5782	25.3985	24.3466	23.5305	23.2027	24.2024	23.2066	24.0072	23.4312	22.5708	NaN	NaN	24.902	24.335	23.3974	23.0252	22.8469	23.3805	23.7237	NaN
	0.841406	0.324861	Q9HBI0-3;Q9HBI0-2;Q9HBI0;Q9HBI0-5	Q9HBI0-3;Q9HBI0-2;Q9HBI0	Gamma-parvin	PARVG	Color2 [DarkGray]	1	4					5	5	5	39.6	39.6	39.6	21.439	0	273.01	586410000	97	24.2917	23.5036	23.9224	23.302	24.0454	24.1283	23.8499	24.5509	23.881	23.2425	22.3686	23.7391	23.8909	24.2731	23.8738	21.2717	22.6317	23.0893	24.1359	24.1989	23.872	23.3807	23.7664	24.2396	23.6042
	0.837376	-0.196151	P62195;P62195-2;Q8NB90-3	P62195;P62195-2	26S protease regulatory subunit 8	PSMC5	Color2 [DarkGray]	1	4					15	15	14	46.8	46.8	43.8	45.626	0	323.31	3664300000	287	26.0903	26.6313	25.9472	26.8358	26.642	26.3022	25.6636	26.2432	24.9157	26.1196	25.5937	26.323	25.7177	25.9274	25.8109	26.524	26.5661	26.2044	26.2757	26.0806	26.0462	25.9503	26.3035	25.6951	26.3192
	0.835351	-0.630542	P23743;P23743-3;P23743-2	P23743;P23743-3	Diacylglycerol kinase alpha	DGKA	Color2 [DarkGray]	1	4					14	14	14	27.8	27.8	27.8	82.629	0	323.31	2191700000	252	25.759	26.1913	25.5252	25.746	25.4431	20.7188	25.138	25.0829	21.3461	26.1163	24.7059	26.524	24.3819	25.0359	26.127	26.3151	24.6041	25.3015	25.9893	25.4016	24.7189	26.009	25.8493	25.6712	26.1232
	0.835024	-0.181855	P15880	P15880	40S ribosomal protein S2	RPS2	Color2 [DarkGray]	1	4					5	5	5	22.2	22.2	22.2	31.324	0	323.31	5488500000	227	26.8506	27.3126	27.1523	26.8283	26.3789	27.1929	26.4434	27.0208	26.9101	27.1974	26.6473	26.9142	27.1879	26.3583	27.4652	26.9691	26.5479	26.438	27.1932	27.9618	26.9477	27.1182	27.2383	27.6574	26.7561
	0.832594	-0.134548	P45974-2;P45974;Q92995-2;Q92995	P45974-2;P45974	Ubiquitin carboxyl-terminal hydrolase 5	USP5	Color2 [DarkGray]	1	4					19	19	19	35.8	35.8	35.8	93.307	0	323.31	9881500000	531	27.5721	27.9669	28.0332	27.7231	28.0342	27.8313	27.685	27.837	27.4497	27.9535	27.4764	28.0019	27.7565	27.2817	27.8966	27.5067	27.4539	27.9035	28.1115	27.9572	27.7719	28.2808	28.0758	27.9357	28.2494
	0.832495	0.393246	Q9NX46	Q9NX46	Poly(ADP-ribose) glycohydrolase ARH3	ADPRHL2	Color2 [DarkGray]	1	4					8	8	8	37.5	37.5	37.5	38.946	0	323.31	1354700000	113	24.9632	25.7028	24.9435	25.4559	25.3966	25.0404	24.5171	24.9523	NaN	25.7451	24.5154	25.4285	25.4911	24.7033	25.0328	24.0348	22.3325	25.8322	25.5675	24.1026	24.5005	24.4757	25.5497	25.4539	25.3596
	0.832076	-0.430358	O94768	O94768	Serine/threonine-protein kinase 17B	STK17B	Color2 [DarkGray]	1	4					3	3	3	12.4	12.4	12.4	42.344	0	57.292	338150000	62	21.7925	23.2922	23.6323	22.8601	23.0513	21.1381	22.4109	22.5683	21.3215	22.7189	22.1422	22.8562	21.9366	21.3116	23.3798	25.0661	22.7115	22.4883	24.0817	23.0259	22.6584	23.2898	23.4083	23.6955	23.0032
	0.830218	-0.374093	Q96FS4	Q96FS4	Signal-induced proliferation-associated protein 1	SIPA1	Color2 [DarkGray]	1	4					16	16	16	30	30	30	112.15	0	304.13	2644600000	250	26.1869	26.0234	26.8381	26.0335	25.3482	25.46	25.4568	25.9731	25.0152	25.9274	24.993	25.8363	26.0518	23.5811	25.8194	25.3327	24.7865	26.3571	27.1618	26.1721	25.4607	26.5763	26.1435	26.2711	26.3757
	0.829244	-0.387731	Q53EL6-2;Q53EL6	Q53EL6-2;Q53EL6	Programmed cell death protein 4	PDCD4	Color2 [DarkGray]	1	4					9	9	9	27.5	27.5	27.5	50.576	0	93.902	3091500000	183	25.6308	26.3105	26.9897	26.3961	26.5616	24.9285	25.4108	24.4844	24.78	26.259	24.9371	26.4154	26.1047	25.0516	26.804	25.576	25.8207	25.2522	27.1248	26.6431	25.6108	26.5553	26.148	26.7193	27.0483
	0.82587	-0.275332	Q15020;Q15020-4;Q15020-2	Q15020;Q15020-4;Q15020-2	Squamous cell carcinoma antigen recognized by T-cells 3	SART3	Color2 [DarkGray]	1	4					10	10	10	13.4	13.4	13.4	109.93	0	323.31	990990000	138	23.8611	24.5215	24.9147	24.6924	24.8351	23.8709	23.967	24.1178	23.9047	24.3511	23.8241	24.8921	24.0507	23.4152	25.6668	24.5136	23.5919	24.083	24.7875	25.0068	24.1816	24.9213	25.1507	24.0483	25.0781
	0.824197	-0.704975	Q9NVD7;Q9NVD7-2	Q9NVD7	Alpha-parvin	PARVA	Color2 [DarkGray]	1	4					5	5	4	19.1	19.1	15.6	42.243	0	255.32	436310000	43	NaN	21.5382	21.7379	22.6956	NaN	23.4812	NaN	22.0312	24.2474	23.2529	23.9138	22.6724	23.5006	23.4516	NaN	NaN	25.3275	NaN	NaN	23.1023	26.2424	22.7086	NaN	NaN	23.0575
	0.824041	-0.516136	Q9H008;Q9H008-2	Q9H008;Q9H008-2	Phospholysine phosphohistidine inorganic pyrophosphate phosphatase	LHPP	Color2 [DarkGray]	1	4					4	4	4	37.8	37.8	37.8	29.165	0	69.986	953120000	77	22.078	25.0351	23.2071	22.6786	24.329	23.7558	NaN	23.3191	23.084	23.4525	22.2448	25.1543	24.8256	23.1046	22.7096	25.383	24.1851	24.1578	24.5736	23.2036	25.5898	25.9747	23.6695	NaN	24.5059
	0.82357	-0.330541	Q9BZL4-2;Q9BZL4-3;Q9BZL4-4;Q9BZL4;Q9BZL4-5	Q9BZL4-2;Q9BZL4-3;Q9BZL4-4;Q9BZL4;Q9BZL4-5	Protein phosphatase 1 regulatory subunit 12C	PPP1R12C	Color2 [DarkGray]	1	4					4	4	4	7.9	7.9	7.9	78.233	0	91.244	387470000	44	22.1026	23.5204	23.9327	23.8267	23.8508	NaN	22.7896	NaN	22.6883	23.1035	23.0387	23.4326	22.9327	22.6852	NaN	23.067	23.6196	23.6991	24.2669	23.3597	22.5239	23.9815	NaN	24.4554	23.7104
	0.821091	-0.317172	Q14C86-3;Q14C86-4;Q14C86-5;Q14C86-2;Q14C86;Q14C86-6	Q14C86-3;Q14C86-4;Q14C86-5;Q14C86-2;Q14C86;Q14C86-6	GTPase-activating protein and VPS9 domain-containing protein 1	GAPVD1	Color2 [DarkGray]	1	4					6	6	6	6.7	6.7	6.7	159.75	0	22.407	326920000	27	NaN	22.4421	23.3225	23.0176	23.9488	22.9843	22.4842	NaN	22.062	22.8599	22.4856	22.7339	22.365	22.721	22.9045	24.0103	24.6922	23.4017	23.1547	23.473	NaN	23.298	21.9398	22.5831	23.2571
	0.819213	-0.386559	P35236;P35236-2;P35236-3	P35236;P35236-2;P35236-3	Tyrosine-protein phosphatase non-receptor type 7	PTPN7	Color2 [DarkGray]	1	4					4	4	3	15.3	15.3	13.1	40.529	0	83.44	649280000	76	23.477	24.9652	24.9396	24.0988	24.6787	22.4171	22.392	22.3627	NaN	23.7245	23.0056	24.2323	22.426	NaN	23.7094	25.2231	24.2535	23.8707	24.2945	23.6443	24.008	24.1589	24.2249	24.0756	23.8099
	0.818873	0.510746	P02786	P02786	Transferrin receptor protein 1;Transferrin receptor protein 1, serum form	TFRC	Color2 [DarkGray]	1	4					11	11	11	20.5	20.5	20.5	84.87	0	76.823	1242900000	105	25.6673	23.7024	24.2854	25.2918	25.4578	25.4328	26.186	24.909	25.9461	24.3621	25.539	24.4487	24.7429	24.4672	23.9457	22.8834	23.9049	24.58	25.1234	26.1382	25.2602	24.1483	26.6309	24.1155	23.843
	0.818666	-0.238774	Q15393;Q15393-3;Q15393-2	Q15393	Splicing factor 3B subunit 3	SF3B3	Color2 [DarkGray]	1	4					19	19	19	28.9	28.9	28.9	135.58	0	323.31	3404400000	333	25.3746	25.4416	26.5119	26.5818	26.7388	25.8094	26.1063	25.8776	25.6533	26.4412	26.03	26.6734	25.6935	26.2433	26.9426	25.4579	25.8011	26.2546	26.1045	27.0827	26.4486	26.2777	26.7299	25.5419	26.8387
	0.81777	0.755488	P02763	P02763	Alpha-1-acid glycoprotein 1	ORM1	Color2 [DarkGray]	1	4					7	7	5	40.8	40.8	32.3	23.511	0	323.31	20314000000	225	29.9289	27.8661	26.0791	29.7648	27.8701	28.7061	30.0363	27.5116	31.4369	28.0613	30.5093	28.3574	27.3342	29.6541	27.9401	29.9599	27.3487	28.4661	26.9107	25.4774	28.205	27.0677	30.1127	25.8928	28.6037
	0.816353	0.216091	P42566;P42566-2	P42566;P42566-2	Epidermal growth factor receptor substrate 15	EPS15	Color2 [DarkGray]	1	4					15	15	15	31.2	31.2	31.2	98.655	0	323.31	1314400000	216	24.6459	25.0506	25.5001	25.3114	24.9358	25.1443	25.0127	24.8472	24.3801	25.2739	25.4182	25.0299	24.6807	25.1961	25.2619	24.1112	23.6474	24.9461	25.7264	24.9043	24.9114	24.9276	25.154	23.9701	24.9012
	0.813894	0.359211	P40855;P40855-5	P40855;P40855-5	Peroxisomal biogenesis factor 19	PEX19	Color2 [DarkGray]	1	4					2	2	2	16.7	16.7	16.7	32.806	0	34.91	285390000	41	24.2062	23.3009	NaN	23.7746	23.3081	23.7461	24.0968	NaN	NaN	NaN	23.0275	22.7225	22.5583	22.3427	NaN	22.0298	NaN	22.7902	23.9426	22.4183	22.7276	23.2743	23.4375	22.8023	22.82
	0.809651	0.244722	P22695	P22695	Cytochrome b-c1 complex subunit 2, mitochondrial	UQCRC2	Color2 [DarkGray]	1	4					12	12	12	43.3	43.3	43.3	48.442	0	292.01	3515100000	264	26.37	25.5081	26.6007	25.9089	26.2607	26.5484	26.3642	26.7936	25.9262	26.136	26.3159	26.0135	26.5474	26.8165	27.3094	25.945	25.7275	26.5036	25.371	26.7813	26.2604	26.7634	25.8332	26.5086	25.2566
	0.808603	-0.240995	O95758;O95758-5;O95758-1;O95758-6;O95758-2;O95758-4;O95758-7	O95758;O95758-5;O95758-1;O95758-6;O95758-2;O95758-4;O95758-7	Polypyrimidine tract-binding protein 3	PTBP3	Color2 [DarkGray]	1	4					7	6	6	25.4	23.9	23.9	59.689	0	89.802	425110000	66	22.5167	23.4565	24.22	23.0845	23.8938	23.1868	22.8631	22.9755	22.9997	23.6145	22.9243	23.4636	23.3693	22.0108	23.6922	23.0094	23.7009	NaN	23.1117	23.6558	23.4863	23.6632	22.9523	23.6339	23.8031
	0.808179	0.261517	P14854	P14854	Cytochrome c oxidase subunit 6B1	COX6B1	Color2 [DarkGray]	1	4					4	4	4	57	57	57	10.192	0	176.97	5135700000	144	27.7827	27.6747	26.7554	27.4661	27.2831	26.5274	27.1792	27.2723	26.8061	26.7409	26.9925	26.5965	26.7159	26.2503	26.2864	26.8403	25.8318	27.6567	27.4143	26.4484	26.9408	26.8939	27.2961	27.3289	25.9198
	0.80796	-0.234137	Q9BY44-2;Q9BY44-4;Q9BY44-3;Q9BY44	Q9BY44-2;Q9BY44-4;Q9BY44-3;Q9BY44	Eukaryotic translation initiation factor 2A;Eukaryotic translation initiation factor 2A, N-terminally processed	EIF2A	Color2 [DarkGray]	1	4					2	2	2	8.6	8.6	8.6	41.339	0	271.96	356370000	44	23.1897	22.5839	23.0695	23.5195	24.0754	23.8555	22.9378	23.203	22.6615	23.4104	22.8122	22.8934	22.9355	22.4127	22.9841	NaN	22.9692	NaN	23.0892	23.2166	23.1347	23.966	23.3542	23.3506	23.5223
	0.804722	0.232689	Q9H0W9;Q9H0W9-3;Q9H0W9-2;Q9H0W9-4	Q9H0W9;Q9H0W9-3;Q9H0W9-2	Ester hydrolase C11orf54	C11orf54	Color2 [DarkGray]	1	4					5	5	5	21.9	21.9	21.9	35.117	0	14.273	461050000	88	23.5783	23.6815	23.7974	23.6437	23.3467	23.863	23.5459	23.776	23.6449	23.784	23.0807	23.7291	22.8983	23.1326	23.6443	22.598	22.5524	23.4694	23.8854	23.2469	23.882	24.098	23.3173	23.9076	23.4078
	0.803772	0.273369	P00367;P00367-3;P00367-2;P49448	P00367;P00367-3;P00367-2;P49448	Glutamate dehydrogenase 1, mitochondrial;Glutamate dehydrogenase 2, mitochondrial	GLUD1;GLUD2	Color2 [DarkGray]	1	4					18	18	18	47.1	47.1	47.1	61.397	0	194.92	6449500000	348	26.6979	26.6274	27.4792	27.2442	26.335	27.3554	27.5627	27.5904	26.7965	27.1638	27.1371	27.0433	27.7589	27.5447	27.8761	26.9906	26.5645	27.2478	26.4059	27.6966	26.7549	27.1215	26.6034	27.1288	26.398
	0.798432	0.268914	Q86V81	Q86V81	THO complex subunit 4	ALYREF	Color2 [DarkGray]	1	4					7	7	7	32.7	32.7	32.7	26.888	0	323.31	9632100000	283	27.9663	28.8506	28.4097	28.0438	28.1392	27.5779	27.9173	27.9495	26.9294	27.7204	27.2722	27.5284	28.0163	27.227	27.4353	27.3439	26.6317	28.0183	28.3577	27.3849	27.7962	26.7876	28.2083	28.7422	27.8287
	0.797298	0.315313	P63000;P60763;P63000-2	P63000;P60763;P63000-2	Ras-related C3 botulinum toxin substrate 1;Ras-related C3 botulinum toxin substrate 3	RAC1;RAC3	Color2 [DarkGray]	1	4					3	2	2	26	21.9	21.9	21.45	0.00026316	4.2123	650570000	44	24.8339	NaN	23.8755	23.5018	22.7824	24.2978	24.1165	24.4259	23.7611	23.9646	23.4216	22.5421	24.0013	24.3607	24.2467	23.5998	22.465	NaN	22.8575	23.3433	23.4532	23.0016	23.5203	NaN	23.0824
	0.7948	-0.309588	O95232;O95232-2	O95232	Luc7-like protein 3	LUC7L3	Color2 [DarkGray]	1	4					5	5	5	16.4	16.4	16.4	51.466	0	104.51	1064300000	117	23.7039	23.4728	24.4268	24.0272	25.0056	24.0929	23.4857	23.7826	23.2801	24.0669	23.3627	25.1126	23.3742	23.2239	23.4501	24.5958	24.9525	23.3639	23.9195	23.8584	26.3392	24.8753	24.2116	24.0192	23.9203
	0.791004	0.384935	P48047	P48047	ATP synthase subunit O, mitochondrial	ATP5O	Color2 [DarkGray]	1	4					7	7	7	49.3	49.3	49.3	23.277	0	174.33	3561900000	131	26.2984	25.2577	27.0744	26.2391	26.0039	26.8276	26.8691	26.8249	26.1737	26.1626	26.6087	25.8461	26.8599	26.8541	27.0435	25.8956	26.177	26.0235	26.4572	27.307	25.3142	26.5328	25.6519	26.4187	22.6984
	0.79054	0.145086	P61019;P61019-2	P61019;P61019-2	Ras-related protein Rab-2A	RAB2A	Color2 [DarkGray]	1	4					9	9	4	51.9	51.9	23.6	23.545	0	323.31	3095900000	257	26.0779	26.0613	26.5405	26.4585	26.3581	26.472	26.0959	26.0192	26.7044	26.0645	26.0229	25.6981	26.4927	26.6494	26.3475	26.1	26.6217	26.32	26.4635	26.0027	26.64	26.2785	25.4849	25.7521	25.7455
	0.789481	-0.209623	Q7KZF4	Q7KZF4	Staphylococcal nuclease domain-containing protein 1	SND1	Color2 [DarkGray]	1	4					24	24	24	40.9	40.9	40.9	102	0	323.31	4985100000	326	26.7799	25.6636	27.1042	27.0329	26.5149	26.9189	26.9158	26.8006	26.0284	26.8708	26.8164	27.2003	26.6986	26.8114	27.135	26.8482	26.333	26.0962	26.1894	27.5712	27.2697	27.0477	27.1822	27.16	27.0592
	0.788479	0.356614	Q16864;Q16864-2	Q16864;Q16864-2	V-type proton ATPase subunit F	ATP6V1F	Color2 [DarkGray]	1	4					6	6	6	72.3	72.3	72.3	13.37	0	323.31	5036000000	236	28.2323	27.4998	26.2436	27.1534	26.9671	27.0977	27.4039	27.8124	27.3129	26.0009	26.8403	26.6954	27.0632	26.4938	25.6472	26.5531	25.9511	27.6292	26.8263	26.7698	27.4644	26.8511	27.4213	27.4466	26.6301
	0.787593	0.211896	P61081	P61081	NEDD8-conjugating enzyme Ubc12	UBE2M	Color2 [DarkGray]	1	4					3	3	3	19.7	19.7	19.7	20.9	0	54.71	380000000	58	23.7567	23.6313	23.097	23.9007	23.0782	23.0678	23.454	23.403	22.4549	23.4599	22.9925	23.9365	23.1264	23.4803	23.9251	22.7038	NaN	23.3769	23.1786	23.27	22.6216	23.7213	23.1728	23.6037	23.3027
	0.785541	-0.128785	O43776;O43776-2	O43776	Asparagine--tRNA ligase, cytoplasmic	NARS	Color2 [DarkGray]	1	4					13	13	13	31.4	31.4	31.4	62.942	0	323.31	2136400000	312	25.8267	25.5878	25.7369	25.0865	25.6554	25.4406	25.6449	25.5274	25.4004	25.5913	25.4681	25.8219	25.6197	25.2415	25.5871	25.3053	24.7548	25.8699	25.603	26.0196	25.6649	25.6676	25.9661	25.5279	25.633
	0.784289	-0.343236	Q8WUK0-2;Q8WUK0-3;Q8WUK0	Q8WUK0-2;Q8WUK0-3;Q8WUK0	Phosphatidylglycerophosphatase and protein-tyrosine phosphatase 1	PTPMT1	Color2 [DarkGray]	1	4					2	2	2	18.2	18.2	18.2	15.689	0.00027122	4.8461	54029000	40	NaN	21.365	21.1127	18.2593	19.9144	20.634	20.3082	20.4002	20.1201	20.5877	20.6621	20.6244	20.3769	19.7384	NaN	21.8805	NaN	NaN	20.4468	20.7894	20.8015	20.1418	NaN	20.7993	19.9869
	0.779969	-0.192021	Q92974-3;Q92974-2;Q92974	Q92974-3;Q92974-2;Q92974	Rho guanine nucleotide exchange factor 2	ARHGEF2	Color2 [DarkGray]	1	4					19	19	19	30.4	30.4	30.4	108.24	0	144.84	1257300000	187	23.9216	25.3555	25.3497	24.8101	25.0505	24.486	24.9001	24.7769	23.5674	24.7689	24.4828	25.152	24.669	24.8195	24.409	25.1423	24.6079	24.9496	25.1733	24.8686	24.9238	24.7721	24.9392	25.1166	25.159
	0.778715	0.306199	P07203;P07203-2	P07203	Glutathione peroxidase 1	GPX1	Color2 [DarkGray]	1	4					12	12	12	76.8	76.8	76.8	22.088	0	323.31	14373000000	413	29.7069	27.9079	27.4289	28.4405	27.1454	28.5753	29.2808	29.2371	28.4558	27.7538	27.9613	27.9683	28.4877	28.2724	27.5549	28.2004	26.7943	29.1198	28.3316	27.9667	27.4308	28.1591	28.5026	28.2853	27.614
	0.775055	-0.295438	P61221	P61221	ATP-binding cassette sub-family E member 1	ABCE1	Color2 [DarkGray]	1	4					8	8	8	22.2	22.2	22.2	67.314	0	323.31	952500000	139	23.777	24.3283	24.0393	23.4992	24.5147	23.6249	23.1052	23.8956	23.0618	24.5971	23.6565	24.215	24.0543	22.7437	25.0646	23.8507	24.7856	24.0915	23.8952	24.9206	22.5188	23.2825	24.5496	23.5921	24.7004
	0.774842	-0.380097	Q6PKG0;Q6PKG0-3;Q659C4-7;Q659C4-6;Q659C4-5;Q659C4-9;Q659C4-2;Q659C4	Q6PKG0;Q6PKG0-3	La-related protein 1	LARP1	Color2 [DarkGray]	1	4					8	8	8	15.2	15.2	15.2	123.51	0	189.69	656680000	76	22.1555	24.206	22.2821	23.9094	23.46	23.6054	23.812	22.7687	23.0326	23.9718	23.0459	24.9615	24.4022	NaN	23.5633	25.07	23.746	24.0598	24.0378	23.897	25.0484	22.7113	23.8899	24.3894	23.6337
	0.774816	0.324757	P01040	P01040	Cystatin-A;Cystatin-A, N-terminally processed	CSTA	Color2 [DarkGray]	1	4					3	3	3	40.8	40.8	40.8	11.006	0	33.62	1584300000	65	24.858	25.0546	25.5568	25.8187	24.883	24.5788	24.5987	26.3065	25.9475	25.9492	25.0548	26.6061	24.3727	24.684	24.7	24.0933	25.2604	25.3611	25.8218	24.2149	25.2074	25.2263	25.0635	25.3976	25.218
	0.773228	-0.239677	P55795	P55795	Heterogeneous nuclear ribonucleoprotein H2	HNRNPH2	Color2 [DarkGray]	1	4					9	7	7	32.3	25.6	25.6	49.263	0	86.717	1713600000	151	25.0161	25.3995	25.885	25.4833	25.1474	25.109	25.0247	24.2215	24.3483	23.6105	24.9344	25.4016	24.9573	24.7818	24.8521	25.2571	24.1363	24.4079	25.3214	25.3284	25.9543	24.9475	24.8879	25.6147	25.1533
	0.773036	-0.272209	Q9BZE9;Q9BZE9-2;Q9BZE9-3;Q9BZE9-4	Q9BZE9;Q9BZE9-2;Q9BZE9-3	Tether containing UBX domain for GLUT4	ASPSCR1	Color2 [DarkGray]	1	4					6	6	6	20.8	20.8	20.8	60.182	0	24.973	278730000	38	23.3027	21.5804	22.373	23.6955	22.6677	NaN	22.5008	NaN	NaN	22.712	22.4944	22.7281	22.4856	NaN	22.4826	24.0669	23.2539	23.1819	23.4605	NaN	23.0274	23.2864	NaN	22.9944	22.4697
	0.770065	0.39182	O95571	O95571	Persulfide dioxygenase ETHE1, mitochondrial	ETHE1	Color2 [DarkGray]	1	4					6	6	6	35.8	35.8	35.8	27.873	0	44.7	2086600000	71	26.9612	22.5956	25.3867	25.8279	25.6917	26.5545	27.5471	25.7176	25.3996	25.0257	26.0534	25.7294	25.2979	26.2489	25.3059	26.1603	24.3401	26.4152	25.4401	25.7582	25.1991	25.6366	24.9651	25.3034	24.8293
	0.769147	0.152743	P61106	P61106	Ras-related protein Rab-14	RAB14	Color2 [DarkGray]	1	4					5	5	5	31.2	31.2	31.2	23.897	0	307.78	3314700000	140	26.7335	25.6346	26.4185	26.254	26.3313	26.3536	26.5122	26.3326	26.34	26.4553	25.9526	25.7132	26.7603	26.5434	26.2799	26.1729	25.738	26.4139	26.3776	26.7061	26.3979	25.7541	25.8332	25.8814	26.185
	0.76751	-0.159747	P40227;P40227-2	P40227;P40227-2	T-complex protein 1 subunit zeta	CCT6A	Color2 [DarkGray]	1	4					16	16	13	41.1	41.1	35.4	58.024	0	323.31	7486100000	444	26.9458	27.7199	27.1355	27.0845	27.3497	27.2117	26.7546	27.3736	26.6823	27.3221	27.1702	27.3564	27.6842	27.4695	27.5665	27.1641	27.6116	26.5904	27.0991	27.7129	27.8356	27.8185	26.8777	27.1576	27.8827
	0.767312	0.576993	Q99467	Q99467	CD180 antigen	CD180	Color2 [DarkGray]	1	4					2	2	2	4.2	4.2	4.2	74.178	0	16.592	153570000	23	NaN	24.65	21.1745	22.4352	22.3279	21.2883	NaN	NaN	NaN	22.5984	20.012	NaN	NaN	21.9137	22.2237	22.5878	NaN	22.2056	22.032	21.6192	20.514	21.8107	NaN	21.2403	21.8596
	0.765644	0.208431	Q9BRA2	Q9BRA2	Thioredoxin domain-containing protein 17	TXNDC17	Color2 [DarkGray]	1	4					4	4	4	46.3	46.3	46.3	13.941	0	323.31	3449400000	164	27.2278	26.4071	25.7668	26.324	26.3658	25.9178	26.6058	26.7294	26.2863	26.5879	26.6576	26.6161	26.2222	26.3357	26.1571	25.4835	25.1041	26.0477	26.2371	25.6427	26.4319	26.0506	26.6502	26.5828	26.5845
	0.764916	0.279076	Q9Y2Q5;Q9Y2Q5-2;Q9Y2Q5-3	Q9Y2Q5;Q9Y2Q5-2	Ragulator complex protein LAMTOR2	LAMTOR2	Color2 [DarkGray]	1	4					5	5	5	73.6	73.6	73.6	13.507	0	111.44	1208700000	135	25.2846	24.9905	25.0123	24.7955	24.933	25.1441	25.5089	24.9791	25.2351	24.6204	24.1139	24.1313	24.9025	25.1638	23.7102	25.1257	25.143	23.7841	24.919	24.0215	24.9948	23.6634	24.6642	25.1204	24.6088
	0.764284	0.41526	P19971;P19971-2	P19971;P19971-2	Thymidine phosphorylase	TYMP	Color2 [DarkGray]	1	4					23	23	23	69.5	69.5	69.5	49.955	0	323.31	147060000000	2823	32.6166	31.6756	30.4436	31.3776	31.7351	32.7169	31.6154	32.2259	31.7255	30.5794	30.7291	31.1869	32.2572	30.7917	29.5529	31.2918	30.2751	32.7121	31.6104	31.3376	30.8197	30.8305	31.5332	31.6143	30.7508
	0.7642	-0.338404	O15514	O15514	DNA-directed RNA polymerase II subunit RPB4	POLR2D	Color2 [DarkGray]	1	4					4	4	4	48.6	48.6	48.6	16.311	0	253.83	453540000	76	23.2698	24.132	22.8441	23.8716	NaN	22.8466	23.1574	21.3389	22.7939	23.104	23.006	23.1994	23.1186	22.6511	22.2459	24.1903	24.856	23.4682	23.7302	22.0413	23.0002	23.2087	23.5404	23.6139	23.0812
	0.763007	0.193818	P11413;P11413-2;P11413-3	P11413;P11413-2;P11413-3	Glucose-6-phosphate 1-dehydrogenase	G6PD	Color2 [DarkGray]	1	4					16	16	16	35.3	35.3	35.3	59.256	0	323.31	6865000000	454	27.8682	27.0739	27.2153	27.3457	27.1054	27.455	27.5563	28.0086	27.8518	27.0088	26.9864	27.1539	27.5125	27.579	27.2	27.2939	26.0774	27.5767	27.0317	27.5004	27.1436	26.9185	27.3254	27.2238	27.0512
	0.761947	-0.21373	Q13098-5;Q13098;Q13098-7;Q13098-6	Q13098-5;Q13098;Q13098-7;Q13098-6	COP9 signalosome complex subunit 1	GPS1	Color2 [DarkGray]	1	4					6	6	6	21.8	21.8	21.8	55.092	0	34.661	722060000	121	23.1835	24.0628	24.2343	23.9804	24.523	24.0665	23.9704	24.2701	23.4406	24.3948	23.2207	24.3246	23.9771	NaN	24.0601	23.5063	22.8091	24.0586	23.7387	24.7369	24.3444	24.3884	24.6061	23.8599	24.2875
	0.761481	-0.314043	Q96DH6;Q96DH6-2;Q96DH6-3	Q96DH6;Q96DH6-2;Q96DH6-3	RNA-binding protein Musashi homolog 2	MSI2	Color2 [DarkGray]	1	4					4	4	4	18.9	18.9	18.9	35.196	0	12.549	264350000	84	22.3332	22.3848	22.7451	22.9086	22.7927	21.9796	22.5974	NaN	20.2989	23.3113	23.0154	23.5892	NaN	NaN	22.6979	22.6238	NaN	22.9243	22.8616	22.5493	22.8051	23.6167	23.1795	23.3251	23.2321
	0.761035	-0.334457	Q00839-2;Q00839	Q00839-2;Q00839	Heterogeneous nuclear ribonucleoprotein U	HNRNPU	Color2 [DarkGray]	1	4					13	13	13	25.6	25.6	25.6	88.979	0	323.31	12026000000	562	26.8866	26.1153	28.3709	28.0021	26.259	27.5356	27.8008	28.0052	27.0641	28.5713	27.8757	28.4347	27.5371	27.2673	29.2161	27.636	26.7466	27.0299	27.4442	29.2074	27.8252	27.5292	28.3638	27.6453	28.181
	0.760727	-0.216176	P08133;P08133-2	P08133;P08133-2	Annexin A6	ANXA6	Color2 [DarkGray]	1	4					30	30	30	53.3	53.3	53.3	75.872	0	323.31	61706000000	1403	30.3737	30.621	30.8714	30.3485	30.929	29.6236	29.5133	30.2377	29.4214	30.5705	29.7822	30.3343	29.8075	29.5572	30.825	30.443	30.1266	30.1877	30.8929	29.9354	30.0914	30.7873	30.3914	30.1971	30.4531
	0.759785	0.346853	Q9BY43;Q9BY43-2	Q9BY43;Q9BY43-2	Charged multivesicular body protein 4a	CHMP4A	Color2 [DarkGray]	1	4					2	2	2	14.9	14.9	14.9	25.098	0	323.31	803680000	44	24.3114	24.5732	24.517	24.9859	25.5027	24.6277	24.6919	24.994	24.2281	NaN	23.2105	24.8563	24.7198	23.7172	24.1395	NaN	NaN	NaN	24.6427	24.1755	24.8563	23.637	22.2231	24.9808	NaN
	0.758389	-0.160941	O00410;O00410-3;O00410-2;O60518	O00410;O00410-3;O00410-2	Importin-5	IPO5	Color2 [DarkGray]	1	4					20	20	20	29	29	29	123.63	0	323.31	3811100000	374	26.1959	26.9733	26.209	26.8129	26.938	26.0281	26.7354	25.7477	25.7974	26.7425	26.1626	26.5597	26.0192	25.7887	26.0835	26.0946	26.1568	26.7094	26.7282	26.2963	26.1582	26.5219	26.856	26.5812	26.4689
	0.75795	0.265612	P61586;P62745	P61586	Transforming protein RhoA	RHOA	Color2 [DarkGray]	1	4					7	7	2	55.4	55.4	18.7	21.768	0	323.31	4689800000	263	26.2829	26.8257	27.2116	27.1796	26.2305	26.6652	27.2368	27.217	26.6855	27.1345	26.2918	25.8768	26.9826	26.8647	27.3632	26.1297	25.6936	25.7462	26.9421	27.232	24.8325	26.3329	26.6061	26.9344	26.2594
	0.757776	-0.404546	P49736	P49736	DNA replication licensing factor MCM2	MCM2	Color2 [DarkGray]	1	4					20	20	20	33.7	33.7	33.7	101.89	0	129.64	1035100000	198	24.1966	24.3972	24.1396	25.3392	24.8427	24.1966	22.8706	24.3279	22.084	25.3916	23.8192	25.0801	24.402	23.2745	24.2173	22.395	23.1824	24.5407	25.1038	25.1474	24.4925	24.9338	26.3511	24.4995	24.6259
	0.756764	0.612514	P01591	P01591	Immunoglobulin J chain	IGJ	Color2 [DarkGray]	1	4					4	4	4	29.6	29.6	29.6	18.098	0	35.07	1669200000	75	26.8727	24.1116	NaN	27.5113	NaN	24.5702	25.5571	NaN	26.9188	24.3635	26.3684	25.5847	24.0965	25.2427	24.1021	26.2024	24.907	26.2254	25.1655	23.7484	25.95	23.4984	25.541	24.3466	25.8056
	0.756427	-0.410794	Q5JPE7-3;Q5JPE7-2;Q15155;P69849;Q5JPE7	Q5JPE7-3;Q5JPE7-2;Q15155;P69849;Q5JPE7	Nodal modulator 2;Nodal modulator 1;Nodal modulator 3	NOMO2;NOMO1;NOMO3	Color2 [DarkGray]	1	4					6	6	6	10.4	10.4	10.4	122.06	0	99.899	345010000	84	21.5704	NaN	22.7529	21.9105	22.5166	22.6173	23.6046	22.8814	22.8723	22.4813	23.2014	22.6466	22.9049	23.6438	23.3715	24.7046	24.5617	21.3145	21.9634	24.0772	23.8616	NaN	NaN	NaN	23.2677
	0.756277	0.206696	O43181	O43181	NADH dehydrogenase [ubiquinone] iron-sulfur protein 4, mitochondrial	NDUFS4	Color2 [DarkGray]	1	4					2	2	2	24	24	24	20.108	0.00074553	3.334	582660000	44	24.3592	23.552	24.5692	24.5692	23.7712	24.0115	24.0146	NaN	23.5335	23.962	23.8469	23.3766	24.1214	24.2835	24.076	23.8275	NaN	24.0962	24.2316	23.5064	23.5854	23.7775	23.6724	24.4072	22.9863
	0.755676	0.251019	P04839;Q9Y5S8-2;Q9Y5S8-3;Q9Y5S8	P04839	Cytochrome b-245 heavy chain	CYBB	Color2 [DarkGray]	1	4					8	8	8	21.4	21.4	21.4	65.335	0	168.72	2034800000	125	25.858	25.8665	25.6137	25.4816	25.2472	26.3155	25.1567	26.3377	26.0507	25.0857	25.0486	25.0895	24.9979	25.8266	25.8308	25.8852	24.9737	26.1742	25.3519	26.4708	25.0928	24.8597	25.5178	24.3797	25.0737
	0.755226	0.315434	P21964-2;P21964	P21964-2;P21964	Catechol O-methyltransferase	COMT	Color2 [DarkGray]	1	4					9	9	9	63.8	63.8	63.8	24.449	0	284.85	1623100000	156	25.1308	25.2527	24.4186	24.5873	24.9104	25.4428	25.589	25.0111	25.6142	24.7632	25.7821	25.3033	24.7921	25.6207	23.8991	25.7214	26.1523	24.1858	24.2474	25.1068	25.5045	23.7117	24.7457	24.2106	24.2463
	0.753392	0.263195	Q9Y6M7-9;Q9Y6M7-6;Q9Y6M7-13;Q9Y6M7-12;Q9Y6M7-8;Q9Y6M7-7;Q9Y6M7-11;Q9Y6M7-14;Q9Y6M7-10;Q9Y6M7-4;Q9Y6M7-3;Q9Y6M7-2;Q9Y6M7;Q9Y6M7-5	Q9Y6M7-9;Q9Y6M7-6;Q9Y6M7-13;Q9Y6M7-12;Q9Y6M7-8;Q9Y6M7-7;Q9Y6M7-11;Q9Y6M7-14;Q9Y6M7-10;Q9Y6M7-4;Q9Y6M7-3;Q9Y6M7-2;Q9Y6M7	Sodium bicarbonate cotransporter 3	SLC4A7	Color2 [DarkGray]	1	4					4	4	4	7.3	7.3	7.3	123.41	0.00026192	4.1284	69493000	36	20.8589	NaN	21.6234	20.7797	21.4858	21.376	20.2221	20.721	21.4657	21.1157	21.8474	21.2505	21.405	20.7044	20.3397	21.4987	20.2104	21.4433	NaN	NaN	20.7835	NaN	NaN	20.1917	21.1423
	0.75314	0.405453	P07339	P07339	Cathepsin D;Cathepsin D light chain;Cathepsin D heavy chain	CTSD	Color2 [DarkGray]	1	4					15	15	15	55.3	55.3	55.3	44.552	0	323.31	22161000000	1033	30.1074	28.2026	27.5622	29.1708	27.4667	29.6342	29.4909	29.8218	28.9627	28.2074	28.0402	28.2333	28.8545	28.2099	27.0815	27.8955	27.3137	29.2379	27.9851	28.6345	28.0256	27.7136	30.0329	28.6008	27.7442
	0.752663	-0.34555	Q02878	Q02878	60S ribosomal protein L6	RPL6	Color2 [DarkGray]	1	4					3	3	3	14.6	14.6	14.6	32.728	0	190.47	2574000000	135	24.1467	27.0722	26.693	24.6287	25.1689	25.6814	24.7303	25.8458	25.0137	25.9914	25.1365	23.4382	25.7173	25.1966	26.4953	26.0023	27.0612	24.8884	25.562	26.4338	26.431	25.5989	25.8207	25.8673	25.4091
	0.751704	0.458461	P04179-4;P04179;P04179-2;P04179-3	P04179-4;P04179;P04179-2	Superoxide dismutase [Mn], mitochondrial	SOD2	Color2 [DarkGray]	1	4					5	5	5	53.4	53.4	53.4	19.73	0	323.31	20595000000	338	29.3156	27.4844	28.1108	28.0753	27.7319	30.6063	30.6706	31.0232	29.4126	28.3688	28.2135	29.0391	28.8807	27.724	27.9875	28.598	28.2601	29.2393	27.5421	29.9399	28.6346	27.8709	29.1168	27.9538	27.3172
	0.750758	0.745906	P01861	P01861	Ig gamma-4 chain C region	IGHG4	Color2 [DarkGray]	1	4					9	4	3	43.1	22.6	18.3	35.94	0	150.41	12330000000	98	26.2877	NaN	26.9391	28.1077	27.0598	27.312	28.2791	24.6684	27.5606	28.0964	29.3543	27.7189	29.5476	30.1664	28.7212	28.2524	29.0067	26.2026	25.3486	24.994	27.8941	27.5728	26.811	NaN	28.7923
	0.748465	-0.31598	Q96G03;Q96G03-2	Q96G03	Phosphoglucomutase-2	PGM2	Color2 [DarkGray]	1	4					10	10	10	23.9	23.9	23.9	68.283	0	323.31	2439900000	148	25.87	23.0297	25.9836	26.294	23.7804	25.7976	26.1399	25.9228	25.6202	26.0319	25.3791	25.9254	25.6532	25.5562	26.5749	26.2196	25.5644	25.9337	25.7655	25.5424	25.8869	25.2225	26.3845	26.1289	26.0925
	0.746795	0.205252	O60664-4;O60664-3;O60664;O60664-2	O60664-4;O60664-3;O60664;O60664-2	Perilipin-3	PLIN3	Color2 [DarkGray]	1	4					14	14	14	57.3	57.3	57.3	45.803	0	323.31	16255000000	581	28.819	28.1247	27.4682	28.7569	28.8185	28.1052	28.813	28.4615	28.8463	28.3961	28.7581	28.6554	28.8104	28.9497	27.3198	28.2178	27.8784	28.7217	28.5302	27.5353	28.8054	28.2487	28.5723	28.0447	27.8947
	0.745639	0.391175	P62316-2;P62316	P62316-2;P62316	Small nuclear ribonucleoprotein Sm D2	SNRPD2	Color2 [DarkGray]	1	4					4	4	4	33.3	33.3	33.3	12.398	0	323.31	3898000000	123	26.223	26.9648	27.0146	26.6521	26.6906	27.2064	26.6698	25.4615	26.5696	NaN	26.2966	26.6992	26.4637	27.0887	27.1108	26.4234	26.7907	26.7182	26.0878	26.3813	26.537	26.8918	26.1117	27.0518	26.5117
	0.745126	-0.49008	Q8N8A2;Q8N8A2-2;Q8N8A2-4;Q8N8A2-3;Q8N8A2-5;O15084-2;O15084;O15084-4;O15084-1	Q8N8A2;Q8N8A2-2;Q8N8A2-4;Q8N8A2-3	Serine/threonine-protein phosphatase 6 regulatory ankyrin repeat subunit B	ANKRD44	Color2 [DarkGray]	1	4					12	12	12	19.3	19.3	19.3	107.6	0	127.59	1332200000	108	25.4653	25.8342	25.7985	24.8253	24.9712	24.1362	NaN	20.9523	24.3257	25.6406	23.5493	23.7151	24.4715	NaN	24.8901	24.3265	24.5899	24.5162	26.1025	25.9257	24.1796	26.1813	25.1111	25.1424	25.5583
	0.744294	-0.21177	Q13155;Q13155-2	Q13155;Q13155-2	Aminoacyl tRNA synthase complex-interacting multifunctional protein 2	AIMP2	Color2 [DarkGray]	1	4					6	6	6	37.5	37.5	37.5	35.348	0	88.969	836600000	113	24.288	23.5309	24.6062	24.3936	24.5318	24.2534	24.2365	24.1327	23.1203	24.2848	23.9073	24.5721	24.1025	24.0772	23.8746	23.4483	23.4551	24.2304	24.3493	24.4178	24.5632	24.7248	24.8455	23.9781	24.4586
	0.741008	0.230512	O00159;O00159-2;O00159-3	O00159;O00159-2;O00159-3	Unconventional myosin-Ic	MYO1C	Color2 [DarkGray]	1	4					23	23	23	33.9	33.9	33.9	121.68	0	323.31	2716700000	385	25.6365	25.7444	26.3816	25.8354	25.68	26.6706	25.6543	25.249	26.2021	25.6623	26.1361	25.6775	25.6515	26.9695	26.7184	25.4404	26.291	26.0959	25.4321	26.481	26.112	25.7074	24.9123	25.4356	25.6333
	0.740134	0.253764	P43034;P43034-2	P43034	Platelet-activating factor acetylhydrolase IB subunit alpha	PAFAH1B1	Color2 [DarkGray]	1	4					3	3	3	9	9	9	46.637	0	185.67	1041900000	78	24.3742	24.8934	24.6568	25.1668	24.1162	24.2394	24.3858	24.9217	24.4754	25.3899	24.4219	24.9769	24.8384	24.6372	25.4724	23.6187	22.9551	24.5972	24.8311	24.908	23.1777	23.7971	24.889	24.9557	24.7824
	0.739032	0.658695	P06702	P06702	Protein S100-A9	S100A9	Color2 [DarkGray]	1	4					5	5	5	43.9	43.9	43.9	13.242	0	323.31	41205000000	1038	29.5898	28.2416	27.5691	29.64	28.6858	29.7568	31.0741	29.4194	31.762	28.8736	30.9853	30.8995	29.0057	29.5017	28.0321	29.4165	30.2294	29.9973	26.9116	28.5559	29.7971	28.0505	28.8445	28.469	29.7462
	0.738936	0.264936	P36551	P36551	Oxygen-dependent coproporphyrinogen-III oxidase, mitochondrial	CPOX	Color2 [DarkGray]	1	4					3	3	3	7	7	7	50.151	0	78.002	115320000	53	NaN	21.0594	22.8787	21.7235	21.859	21.9726	20.9572	NaN	21.8274	21.3492	21.8725	21.8902	21.6778	NaN	NaN	21.6352	NaN	NaN	20.6857	22.0941	22.155	21.3714	21.1127	21.5928	NaN
	0.738778	-0.209621	P61966;P61966-2	P61966	AP-1 complex subunit sigma-1A	AP1S1	Color2 [DarkGray]	1	4					3	3	3	24.1	24.1	24.1	18.733	0	193.08	244280000	40	23.4556	22.6364	21.9263	22.6933	23.2591	NaN	22.3932	22.734	NaN	22.7163	NaN	22.781	22.3725	22.4573	22.8521	NaN	23.273	22.4498	23.1273	23.1383	22.4893	22.8624	23.237	22.6767	22.8606
	0.738733	-0.328422	P27694	P27694	Replication protein A 70 kDa DNA-binding subunit;Replication protein A 70 kDa DNA-binding subunit, N-terminally processed	RPA1	Color2 [DarkGray]	1	4					13	13	13	34.6	34.6	34.6	68.137	0	168.05	869880000	182	22.4088	23.7663	24.5207	23.9233	24.3344	23.5847	23.3687	24.2751	23.4669	24.6454	23.2867	24.3785	24.0108	22.2984	25.1325	24.4293	23.912	23.8594	24.1516	25.104	23.5716	24.1917	24.2297	23.1847	24.6577
	0.737245	-0.13812	O00571;O00571-2;Q9NQI0-3;Q9NQI0-2;Q9NQI0-4;Q9NQI0	O00571;O00571-2	ATP-dependent RNA helicase DDX3X	DDX3X	Color2 [DarkGray]	1	4					14	13	4	31.9	30.2	12.4	73.243	0	323.31	5596300000	365	26.3132	27.2043	27.3959	27.1161	27.0768	26.6536	26.9575	26.6611	26.4582	27.0494	26.6074	27.2182	26.8945	26.7057	27.0907	27.1968	27.1723	26.986	27.0359	27.3844	26.9352	26.8422	27.2454	27.2575	27.1826
	0.736532	0.520414	P09455-3;P09455-2;P09455	P09455-3;P09455-2;P09455	Retinol-binding protein 1	RBP1	Color2 [DarkGray]	1	4					4	4	4	26.8	26.8	26.8	17.523	0	8.8008	362600000	39	23.2123	23.3956	22.9896	23.6826	22.5406	23.9169	NaN	23.2388	24.8098	22.2114	NaN	NaN	23.5626	25.0142	23.6768	20.85	22.9154	23.9793	25.0946	22.5853	23.2125	22.5963	NaN	23.1291	23.4854
	0.736163	0.193947	P49354;P49354-2	P49354;P49354-2	Protein farnesyltransferase/geranylgeranyltransferase type-1 subunit alpha	FNTA	Color2 [DarkGray]	1	4					10	10	10	33	33	33	44.408	0	323.31	1527000000	183	25.0525	26.2557	25.0144	25.0503	24.8519	24.9421	25.0816	25.2483	25.1047	24.9865	24.7234	24.8615	25.3726	24.9733	24.9411	26.5952	25.0823	25.1721	24.9029	24.2758	25.0495	24.97	25.0898	24.6662	24.7742
	0.735024	-0.238116	Q9H4M9	Q9H4M9	EH domain-containing protein 1	EHD1	Color2 [DarkGray]	1	4					24	24	16	60.7	60.7	40.6	60.626	0	323.31	9513100000	517	27.1185	27.5728	28.3554	27.4879	27.4506	27.2866	26.8441	28.0361	26.4701	28.1464	27.1229	27.9741	28.0286	26.6349	28.2096	27.4395	26.8132	27.7242	28.04	27.7768	27.0417	28.103	28.2955	27.6782	27.8583
	0.731764	-0.322772	Q9NTZ6	Q9NTZ6	RNA-binding protein 12	RBM12	Color2 [DarkGray]	1	4					7	7	7	10.3	10.3	10.3	97.394	0	12.582	972150000	61	23.943	24.4625	25.1088	24.5551	25.4363	23.8874	24.3019	23.8522	23.6923	24.5198	22.5909	23.4242	NaN	NaN	24.896	23.0309	23.443	24.9506	25.3785	23.9951	24.7275	25.3694	24.3071	24.9558	24.716
	0.730584	-0.322266	Q9H2H8;Q9H2H8-2	Q9H2H8;Q9H2H8-2	Peptidyl-prolyl cis-trans isomerase-like 3	PPIL3	Color2 [DarkGray]	1	4					4	4	4	26.1	26.1	26.1	18.154	0	33.344	621930000	45	23.3259	24.3464	NaN	24.3624	23.422	NaN	23.7099	NaN	23.9195	24.7071	23.1326	22.6133	22.2174	23.26	23.8679	23.6751	23.1651	24.2681	24.5303	23.9634	23.5867	22.9271	24.3966	24.7327	24.4995
	0.729213	-0.360674	Q9BWD1;Q9BWD1-2	Q9BWD1;Q9BWD1-2	Acetyl-CoA acetyltransferase, cytosolic	ACAT2	Color2 [DarkGray]	1	4					9	9	9	44.1	44.1	44.1	41.35	0	192.81	3628400000	266	26.7196	26.8419	26.8423	25.9758	26.9233	25.7712	26.2613	25.8441	24.1622	26.4946	25.8082	26.2061	25.5934	23.0682	25.7362	25.555	25.7405	26.4754	26.6674	26.2496	25.9391	26.8602	26.8295	26.9717	26.2003
	0.728978	-0.242703	Q4V328;Q4V328-4;Q4V328-2;Q4V328-3	Q4V328;Q4V328-4;Q4V328-2;Q4V328-3	GRIP1-associated protein 1	GRIPAP1	Color2 [DarkGray]	1	4					9	9	9	18.5	18.5	18.5	96.004	0	73.123	403650000	124	24.1067	23.3145	23.3615	23.2912	23.9577	23.2301	22.9096	22.9212	22.0115	23.0125	23.0951	23.063	22.484	NaN	22.6363	22.6936	21.9002	23.9798	23.8689	23.2255	23.6858	23.1806	23.6309	23.1052	23.9088
	0.728262	-0.302507	Q9UNH7;Q9UNH7-2	Q9UNH7;Q9UNH7-2	Sorting nexin-6;Sorting nexin-6, N-terminally processed	SNX6	Color2 [DarkGray]	1	4					5	5	5	13.8	13.8	13.8	46.648	0	93.982	490530000	98	23.521	22.2757	23.4268	23.7187	21.6059	23.639	23.7403	24.0813	NaN	23.2034	23.2661	23.4485	23.0224	22.7204	23.2808	23.5075	24.7663	22.9182	23.2542	23.9617	23.9114	23.6529	22.7761	22.947	23.8833
	0.727854	-0.271538	Q92990-2;Q92990	Q92990-2;Q92990	Glomulin	GLMN	Color2 [DarkGray]	1	4					2	2	2	5	5	5	48.166	0	6.5334	78511000	54	20.697	22.3133	20.5829	21.639	21.607	NaN	NaN	20.4386	20.2844	20.8556	20.0765	21.4728	20.6942	20.6096	20.518	NaN	21.2285	21.5739	21.6103	20.1568	NaN	21.2952	22.0239	21.127	21.0407
	0.727844	-0.296484	Q15758;Q15758-3;Q15758-2	Q15758	Neutral amino acid transporter B(0)	SLC1A5	Color2 [DarkGray]	1	4					5	5	5	14.8	14.8	14.8	56.598	0	99.782	292080000	88	NaN	22.557	21.9375	22.7902	23.1223	22.8605	22.4952	22.6824	22.2541	22.6024	22.3488	21.6138	22.7192	22.6107	21.6044	24.2754	23.8624	23.1516	21.7336	22.9424	22.4038	22.1186	22.9465	NaN	22.4241
	0.727761	-0.409844	Q92900-2;Q92900	Q92900-2;Q92900	Regulator of nonsense transcripts 1	UPF1	Color2 [DarkGray]	1	4					15	15	15	20.1	20.1	20.1	123.03	0	45.633	416360000	92	22.2381	22.6886	22.6756	23.3588	NaN	NaN	22.3195	23.2284	22.6633	24.8751	23.2859	24.1249	23.0544	NaN	24.0914	NaN	NaN	NaN	23.1259	25.1228	22.9146	22.6523	23.853	22.7557	24.3792
	0.727423	-0.305394	Q9UBW5;Q9UBW5-3;Q9UBW5-2	Q9UBW5;Q9UBW5-3;Q9UBW5-2	Bridging integrator 2	BIN2	Color2 [DarkGray]	1	4					9	9	9	32.2	32.2	32.2	61.874	0	261.53	1770200000	129	26.106	24.0943	25.0765	25.292	25.3184	24.2884	25.1971	25.0537	24.6786	25.5201	25.0014	25.2787	25.8043	24.3549	25.4184	25.016	24.4169	26.1757	25.8973	25.3189	24.6551	26.0679	25.501	25.1889	26.0656
	0.726447	0.238692	Q92597;Q92597-3;Q92597-2	Q92597;Q92597-3;Q92597-2	Protein NDRG1	NDRG1	Color2 [DarkGray]	1	4					7	7	7	39.1	39.1	39.1	42.835	0	180.82	1184300000	125	25.2288	25.2632	24.8754	24.9581	24.5349	25.5837	25.267	24.6327	24.834	24.0394	24.5754	24.7002	24.2576	24.5302	23.9246	23.5516	24.309	24.898	24.772	24.6808	24.6511	23.8919	24.4591	24.4871	24.6916
	0.726093	-0.130598	P49589-2;P49589;P49589-3	P49589-2;P49589;P49589-3	Cysteine--tRNA ligase, cytoplasmic	CARS	Color2 [DarkGray]	1	4					10	10	10	17.5	17.5	17.5	82.845	0	80.772	1518500000	193	25.0788	25.4363	25.0401	25.3251	25.3649	25.0341	25.2317	24.9606	25.2224	25.0847	24.8846	25.4087	25.3815	24.4713	25.273	24.7446	25.0166	25.7484	25.2825	25.05	24.9651	25.4721	25.5301	25.0057	25.1878
	0.725718	0.428513	P01034	P01034	Cystatin-C	CST3	Color2 [DarkGray]	1	4					2	2	2	18.5	18.5	18.5	15.799	0	8.2669	411810000	28	23.5315	23.7716	NaN	24.1041	20.6697	NaN	NaN	24.3017	23.566	23.6177	23.8924	23.0254	23.8247	24.4746	23.2029	22.4004	22.3941	24.6446	23.076	21.8187	24.2838	21.9302	22.9741	23.314	22.6899
	0.725336	-0.352384	Q8WUA2	Q8WUA2	Peptidyl-prolyl cis-trans isomerase-like 4	PPIL4	Color2 [DarkGray]	1	4					3	3	3	11.6	11.6	11.6	57.224	0	7.9731	162880000	24	NaN	NaN	21.736	22.6891	21.5624	21.7348	22.2863	22.4913	NaN	21.6173	21.505	22.1004	21.9704	22.2477	22.7277	NaN	21.5935	NaN	24.7257	22.1856	22.0813	22.3936	22.2308	NaN	NaN
	0.722588	0.211668	Q9BS26	Q9BS26	Endoplasmic reticulum resident protein 44	ERP44	Color2 [DarkGray]	1	4					8	8	8	32.5	32.5	32.5	46.971	0	44.136	2900700000	125	26.0161	25.3024	24.7311	26.1517	25.8766	26.9453	26.8667	26.3549	26.7621	25.7426	26.2943	26.2161	26.6043	27.0597	25.8025	26.0036	25.7198	26.3869	25.8551	25.781	26.1866	25.5434	26.0317	25.806	25.6604
	0.722117	-0.284983	P19838-2;P19838;P19838-3	P19838-2;P19838;P19838-3	Nuclear factor NF-kappa-B p105 subunit;Nuclear factor NF-kappa-B p50 subunit	NFKB1	Color2 [DarkGray]	1	4					14	14	14	20.6	20.6	20.6	105.43	0	221.77	1409500000	162	23.7143	24.7914	24.6934	24.2244	25.8497	24.3026	24.8195	25.4813	23.621	25.6183	23.8141	25.5062	24.707	24.3113	24.7409	25.2935	24.3612	24.5155	25.1932	25.0109	24.7693	23.8532	25.4497	25.5821	25.3565
	0.721658	-0.209001	Q14980;Q14980-2;Q14980-4;Q14980-3;Q14980-5	Q14980;Q14980-2;Q14980-4;Q14980-3;Q14980-5	Nuclear mitotic apparatus protein 1	NUMA1	Color2 [DarkGray]	1	4					25	25	25	21.3	21.3	21.3	238.26	0	323.31	3765300000	436	25.3944	25.9611	26.7119	26.1534	26.5558	25.8879	25.9642	25.9016	25.665	26.7354	26.1242	26.792	25.9534	26.0634	27.2462	26.5646	25.8716	25.7688	26.1916	26.6095	26.3498	26.5094	26.4411	26.2244	26.8557
	0.720878	0.66665	O75367-2;O75367-3;O75367	O75367-2;O75367-3;O75367	Core histone macro-H2A.1	H2AFY	Color2 [DarkGray]	1	4					9	9	7	39	39	32	39.183	0	323.31	4511500000	235	24.287	25.1332	27.6205	NaN	NaN	26.8451	26.6529	26.8541	25.7529	27.0847	26.5232	26.834	26.5525	26.9384	28.2211	26.3912	25.6275	NaN	24.4233	27.3995	26.2375	26.8386	25.9307	25.4233	25.7267
	0.720446	-0.219356	Q9NWU2	Q9NWU2	Glucose-induced degradation protein 8 homolog	GID8	Color2 [DarkGray]	1	4					5	5	5	43.4	43.4	43.4	26.748	0	34.665	367010000	99	23.2881	24.1606	21.7731	23.4363	22.7862	22.6047	23.4951	23.0498	22.8236	22.4212	22.5424	22.7163	22.8107	22.5855	22.0766	22.6505	23.3153	22.9982	23.1023	22.7957	23.901	22.6931	23.0459	23.3551	22.8861
	0.720233	-0.301847	Q96PU8-5;Q96PU8-9;Q96PU8-8;Q96PU8-6;Q96PU8-3;Q96PU8	Q96PU8-5;Q96PU8-9;Q96PU8-8;Q96PU8-6;Q96PU8-3;Q96PU8	Protein quaking	QKI	Color2 [DarkGray]	1	4					4	4	4	17.7	17.7	17.7	35.232	0	10.924	471260000	47	22.9987	23.1159	24.6571	24.5623	23.7216	23.3982	24.1632	22.3176	23.2044	23.0767	22.3037	23.1911	24.0872	24.0429	23.1375	23.8887	NaN	23.9976	23.454	24.447	24.4289	23.6702	NaN	NaN	23.4152
	0.720004	0.650215	P49458;P49458-2	P49458	Signal recognition particle 9 kDa protein	SRP9	Color2 [DarkGray]	1	4					3	3	3	31.4	31.4	31.4	10.112	0	16.615	1611600000	61	25.2184	25.6782	26.2433	26.904	25.6617	25.1065	25.7029	25.5572	NaN	25.4796	22.4914	NaN	25.5471	24.8716	25.4535	20.6625	24.2333	25.3254	26.0456	24.9903	25.2771	25.3691	25.9654	25.8831	25.3928
	0.719526	-0.443748	Q709C8-4;Q709C8-2;Q709C8-3;Q709C8	Q709C8-4;Q709C8-2;Q709C8-3;Q709C8	Vacuolar protein sorting-associated protein 13C	VPS13C	Color2 [DarkGray]	1	4					22	22	22	10.2	10.2	10.2	403.08	0	288.12	757310000	193	22.1697	24.8141	24.8991	23.5463	24.3496	23.0992	21.7255	24.1541	22.8144	24.6475	22.9466	24.0536	23.6466	22.9754	24.9474	24.6191	23.5805	23.3972	24.7604	25.0112	23.6213	24.5649	24.0647	22.1533	25.294
	0.71932	0.30699	Q14108;Q14108-2	Q14108;Q14108-2	Lysosome membrane protein 2	SCARB2	Color2 [DarkGray]	1	4					7	7	7	21.5	21.5	21.5	54.29	0	17.117	585360000	89	25.2403	22.7909	NaN	23.8464	23.7487	24.6508	24.4353	24.4762	24.2381	23.9552	23.6164	23.6981	24.3307	23.6795	23.2802	23.4649	22.9337	24.4192	NaN	23.7694	24.1151	23.1144	24.5267	23.5539	22.2266
	0.719213	-0.204258	P52306;P52306-5;P52306-6;P52306-2;P52306-3;P52306-4	P52306;P52306-5;P52306-6;P52306-2;P52306-3;P52306-4	Rap1 GTPase-GDP dissociation stimulator 1	RAP1GDS1	Color2 [DarkGray]	1	4					9	9	9	23.7	23.7	23.7	66.316	0	310.55	940980000	164	24.8106	24.228	23.7685	24.2296	24.8032	24.2549	24.5921	24.2288	24.0181	24.7161	24.432	24.5174	23.9898	24.0133	24.4022	24.6229	24.0233	24.5206	24.8456	24.0208	25.6593	24.6797	24.9772	24.6626	24.4253
	0.719044	0.285344	Q7Z3B4;Q7Z3B4-3;Q7Z3B4-2	Q7Z3B4;Q7Z3B4-3;Q7Z3B4-2	Nucleoporin p54	NUP54	Color2 [DarkGray]	1	4					4	4	4	11.4	11.4	11.4	55.435	0	37.307	166050000	26	NaN	22.84	22.5975	21.9267	NaN	22.7388	22.5025	NaN	21.7013	22.228	NaN	23.7098	NaN	22.3758	22.6168	22.3393	NaN	21.856	21.9952	22.6101	21.6285	22.8716	21.7634	22.1417	21.9777
	0.718246	-0.63916	Q8NF50-4;Q8NF50-3;Q8NF50-2;Q8NF50	Q8NF50-4;Q8NF50-3;Q8NF50-2;Q8NF50	Dedicator of cytokinesis protein 8	DOCK8	Color2 [DarkGray]	1	4					28	28	27	22.1	22.1	21.2	227.47	0	323.31	1120000000	136	23.8003	24.2985	25.9424	23.6939	24.0219	22.613	NaN	25.0152	20.8714	25.6145	22.1189	22.6062	23.3112	NaN	26.6589	24.2892	24.4463	24.5049	25.3925	25.3075	24.342	24.6074	25.5913	23.6884	25.299
	0.717261	0.275916	P16278;P16278-3;P16278-2	P16278;P16278-3;P16278-2	Beta-galactosidase	GLB1	Color2 [DarkGray]	1	4					5	5	5	10.5	10.5	10.5	76.074	0	124.17	910730000	130	24.8854	24.4651	23.406	25.2847	24.6047	23.8715	23.691	22.815	24.9652	24.4554	24.9631	24.2912	24.2629	25.3105	23.3101	24.2194	24.3117	23.8346	24.3345	22.6283	24.5082	24.149	24.6047	24.1598	24.1707
	0.716071	0.49149	P00918	P00918	Carbonic anhydrase 2	CA2	Color2 [DarkGray]	1	4					5	5	5	32.7	32.7	32.7	29.246	0	12.194	547760000	54	23.8243	23.587	24.2859	24.1855	NaN	24.2343	NaN	23.42	23.1561	22.9316	23.7317	NaN	24.0031	25.1637	24.6698	21.4811	25.1999	NaN	NaN	23.0869	NaN	22.2808	24.4929	23.7729	22.9008
	0.715499	0.41091	P09382	P09382	Galectin-1	LGALS1	Color2 [DarkGray]	1	4					8	8	8	69.6	69.6	69.6	14.716	0	323.31	38861000000	1067	30.7826	28.8892	28.6463	30.6527	29.8592	30.391	29.7377	28.0929	31.6108	29.2362	30.4652	29.2242	29.211	30.5179	28.1658	29.4112	30.3994	29.869	28.7426	28.0681	30.2272	29.4345	29.8333	28.6283	28.8397
	0.714884	0.32315	P38646	P38646	Stress-70 protein, mitochondrial	HSPA9	Color2 [DarkGray]	1	4					14	14	14	35.9	35.9	35.9	73.68	0	323.31	8042800000	324	26.7203	26.2331	28.4085	26.9937	26.96	27.9651	27.9127	27.6068	26.895	27.4384	27.7027	27.6649	27.9474	28.055	28.2124	26.7944	27.0173	26.988	26.4427	28.5664	27.4918	27.4324	26.8622	26.5426	26.6421
	0.713085	0.498753	P54105	P54105	Methylosome subunit pICln	CLNS1A	Color2 [DarkGray]	1	4					5	5	5	48.9	48.9	48.9	26.215	0	323.31	1559000000	58	26.2438	25.9024	25.3966	25.971	25.9539	25.0697	25.143	25.3328	25.0259	25.4013	25.0102	25.3351	25.3785	25.3369	NaN	NaN	23.5672	26.0363	25.1982	NaN	24.3232	23.7521	26.0733	26.1636	25.4258
	0.712553	0.250102	P82909	P82909	28S ribosomal protein S36, mitochondrial	MRPS36	Color2 [DarkGray]	1	4					3	3	3	30.1	30.1	30.1	11.466	0	24.745	333880000	71	23.7971	23.7671	23.8942	22.9557	22.7881	23.5505	22.2435	23.272	21.9186	22.2176	22.7307	NaN	22.8908	22.8853	23.0375	22.2159	22.7845	22.818	23.2262	22.8055	22.4857	22.6078	22.5705	23.4273	21.4982
	0.71246	-0.254651	Q8TEX9;Q8TEX9-2	Q8TEX9;Q8TEX9-2	Importin-4	IPO4	Color2 [DarkGray]	1	4					13	13	13	20.6	20.6	20.6	118.71	0	110.25	617450000	185	23.5621	24.7461	24.0502	24.1428	24.6013	23.2787	23.5078	22.679	22.8286	23.8126	23.5467	23.6017	23.3987	22.9595	23.2977	23.8052	23.4448	23.8662	24.1809	24.0641	24.236	23.5078	24.2107	24.3007	24.0177
	0.711668	0.218042	P53004	P53004	Biliverdin reductase A	BLVRA	Color2 [DarkGray]	1	4					9	9	9	52.7	52.7	52.7	33.428	0	223.41	4915600000	232	27.2768	26.3192	26.3936	26.655	26.6633	27.6507	27.1468	27.0791	26.8592	26.5843	27.1531	26.8654	27.7404	26.8612	26.1167	27.2959	26.3833	27.7677	26.3959	26.8451	26.4123	26.7268	26.973	26.9257	26.2986
	0.710323	0.256306	Q06830	Q06830	Peroxiredoxin-1	PRDX1	Color2 [DarkGray]	1	4					11	11	8	64.3	64.3	52.8	22.11	0	234.32	77399000000	447	32.0066	30.0955	30.948	31.0848	30.9327	31.0122	31.1065	31.8565	30.2502	30.7442	30.1954	30.8575	31.0339	30.8296	30.8413	29.7203	29.4921	31.249	31.0651	30.8798	30.3477	30.6311	31.5684	30.8608	30.4384
	0.708395	0.382337	P46934-4;P46934-2;P46934;P46934-3	P46934-4;P46934-2;P46934	E3 ubiquitin-protein ligase NEDD4	NEDD4	Color2 [DarkGray]	1	4					5	5	3	7.9	7.9	5.7	104.22	0	67.71	94579000	31	22.1582	21.7246	NaN	NaN	NaN	NaN	22.3033	NaN	21.9722	21.5683	21.9192	22.0289	21.0375	NaN	21.8086	20.142	22.7077	NaN	NaN	20.9213	NaN	21.602	22.1556	NaN	20.5613
	0.70789	-0.331393	Q13526;O15428	Q13526	Peptidyl-prolyl cis-trans isomerase NIMA-interacting 1	PIN1	Color2 [DarkGray]	1	4					4	4	4	40.5	40.5	40.5	18.243	0	26.595	1595500000	102	25.211	24.9185	25.5808	25.0858	24.4277	25.2836	25.3715	24.5471	24.4366	24.3348	24.4003	24.8803	24.4127	23.4256	23.3924	25.4369	24.8803	24.8885	25.3132	25.0825	24.4001	24.9864	24.826	25.334	25.0717
	0.707453	0.24586	Q9NZZ3;Q9NZZ3-2	Q9NZZ3;Q9NZZ3-2	Charged multivesicular body protein 5	CHMP5	Color2 [DarkGray]	1	4					4	4	4	36.5	36.5	36.5	24.57	0	48.108	259560000	44	24.0512	22.5542	22.0651	22.8851	22.751	23.0508	23.2221	22.7237	22.3573	22.4746	22.9744	22.8325	22.7842	23.1256	22.8594	21.6977	21.4709	23.0999	22.6843	21.8746	22.6878	NaN	23.1341	NaN	22.8931
	0.705472	0.267235	P62318-2;P62318	P62318-2;P62318	Small nuclear ribonucleoprotein Sm D3	SNRPD3	Color2 [DarkGray]	1	4					3	3	3	21.7	21.7	21.7	13.291	0	49.546	10379000000	250	28.29	28.4315	28.7439	28.9979	28.3968	27.684	27.9284	27.7405	26.9526	27.8397	27.1071	27.9194	27.8308	27.3115	28	27.2445	26.7322	27.6404	28.8873	27.6644	27.403	28.3759	27.8993	28.8911	27.5335
	0.705284	0.506616	P01909	P01909	HLA class II histocompatibility antigen, DQ alpha 1 chain	HLA-DQA1	Color2 [DarkGray]	1	4					3	3	3	16.1	16.1	16.1	27.805	0	24.125	893040000	82	25.4866	NaN	25.1397	24.6644	25.5864	24.1017	23.8914	23.9579	25.1677	26.2976	24.0905	NaN	22.9462	NaN	26.0957	NaN	25.3067	24.6349	24.1219	NaN	26.0601	25.5361	23.7672	24.1067	22.9273
	0.705233	-0.280022	P20933	P20933	N(4)-(beta-N-acetylglucosaminyl)-L-asparaginase;Glycosylasparaginase alpha chain;Glycosylasparaginase beta chain	AGA	Color2 [DarkGray]	1	4					2	2	2	9.5	9.5	9.5	37.208	0	323.31	953160000	93	25.3814	23.6731	23.9863	24.2944	25.1214	23.8873	24.257	23.8112	24.0347	24.2915	23.5707	24.0142	23.3209	24.0155	24.0732	24.2089	NaN	25.0495	24.4836	23.4143	24.9445	23.9281	24.1235	24.9247	24.6211
	0.704422	0.177785	Q9Y2Z0-2;Q9Y2Z0	Q9Y2Z0-2;Q9Y2Z0	Suppressor of G2 allele of SKP1 homolog	SUGT1	Color2 [DarkGray]	1	4					5	5	5	24	24	24	37.804	0	82.814	758150000	64	24.1828	25.0181	23.8618	24.3369	24.375	23.9307	23.8798	23.9971	23.7914	24.1268	24.38	23.836	24.572	23.4833	24.2149	24.4598	24.3766	23.5647	24.0278	23.6254	23.5444	24.094	24.4948	23.6671	24.1381
	0.703376	-0.234464	P28068	P28068	HLA class II histocompatibility antigen, DM beta chain	HLA-DMB	Color2 [DarkGray]	1	4					3	3	3	17.5	17.5	17.5	28.943	0	13.04	242700000	52	23.2587	22.9398	22.4481	23.2327	21.3939	NaN	22.6952	22.4104	NaN	22.8748	22.4301	21.9246	NaN	22.6287	23.3838	NaN	NaN	22.3184	23.2886	22.4089	23.2823	23.2607	23.0583	22.8021	22.3159
	0.702406	-0.450277	Q8WYJ6;Q8WYJ6-2	Q8WYJ6;Q8WYJ6-2	Septin-1	SEPT1	Color2 [DarkGray]	1	4					12	12	12	44.7	44.7	44.7	41.97	0	323.31	4231900000	319	25.7406	27.2259	27.5007	26.2838	26.8419	24.7512	25.3351	26.4373	24.4306	27.0938	25.7489	26.9918	25.7599	23.2259	27.4522	25.9718	25.3242	26.5942	27.3836	26.7985	26.297	27.1978	26.2536	27.1863	27.029
	0.70178	-0.171846	P31939;P31939-2	P31939;P31939-2	Bifunctional purine biosynthesis protein PURH;Phosphoribosylaminoimidazolecarboxamide formyltransferase;IMP cyclohydrolase	ATIC	Color2 [DarkGray]	1	4					25	25	25	58.3	58.3	58.3	64.615	0	323.31	9508400000	704	27.6383	27.7776	28.035	27.9207	27.8894	27.363	27.4313	27.4376	27.0322	27.869	27.244	27.988	27.2025	26.4378	27.939	27.1857	27.2862	27.5084	28.2035	27.8131	27.5683	27.9573	28.1862	27.5683	27.8222
	0.701035	-1.40732	P29508;P29508-2	P29508;P29508-2	Serpin B3	SERPINB3	Color2 [DarkGray]	1	4					14	14	7	46.7	46.7	26.4	44.564	0	323.31	1854100000	127	20.9039	23.1096	18.3507	22.0102	24.895	NaN	NaN	28.4579	21.0139	NaN	21.5768	21.0233	NaN	NaN	23.2987	NaN	28.3773	24.0744	23.7904	24.9074	20.7938	NaN	26.0642	27.0301	23.7196
	0.700347	-0.251643	Q7L1Q6-2;Q7L1Q6;Q7L1Q6-4;Q7L1Q6-3	Q7L1Q6-2;Q7L1Q6;Q7L1Q6-4;Q7L1Q6-3	Basic leucine zipper and W2 domain-containing protein 1	BZW1	Color2 [DarkGray]	1	4					4	4	4	20.4	20.4	20.4	40.538	0	235.35	1369500000	102	24.9536	24.3527	25.1927	25.4717	24.9848	24.9684	24.1469	24.7387	24.0975	24.9186	24.6791	24.9491	24.2736	24.6411	24.4189	23.9047	24.2785	24.6632	24.9768	25.2628	24.3738	24.5803	25.0858	24.9506	24.9904
	0.696899	0.178071	Q9UN86-2;Q9UN86	Q9UN86-2;Q9UN86	Ras GTPase-activating protein-binding protein 2	G3BP2	Color2 [DarkGray]	1	4					2	2	2	7.3	7.3	7.3	50.817	0	89.149	467090000	56	NaN	NaN	23.9382	24.0683	24.2385	23.6932	23.9593	23.302	23.4754	23.5671	23.5354	23.7477	24.3204	23.3585	23.1307	NaN	23.62	23.7151	24.1854	23.6948	23.5853	23.8523	NaN	24.3218	23.348
	0.695502	-0.421015	Q08752	Q08752	Peptidyl-prolyl cis-trans isomerase D	PPID	Color2 [DarkGray]	1	4					4	4	4	11.6	11.6	11.6	40.763	0	12.719	200900000	95	21.1119	22.396	22.2544	21.4829	23.507	22.7252	21.8531	22.3724	NaN	22.5754	22.8329	20.4982	22.7733	21.3318	21.4147	20.5455	23.9397	21.441	22.4139	22.6902	22.4497	22.7351	22.7608	22.8449	23.4704
	0.691373	-0.254376	P32519-2;P32519	P32519-2;P32519	ETS-related transcription factor Elf-1	ELF1	Color2 [DarkGray]	1	4					5	5	5	13.6	13.6	13.6	64.928	0	47.399	293130000	44	NaN	23.2604	22.851	22.9193	23.4029	22.1236	NaN	22.4337	22.235	22.9936	22.579	22.9325	22.579	22.616	23.2277	NaN	21.6372	23.1547	23.4785	22.3354	22.5198	23.2577	22.6174	22.2849	23.6698
	0.6903	-0.453182	Q14566	Q14566	DNA replication licensing factor MCM6	MCM6	Color2 [DarkGray]	1	4					16	16	16	27.2	27.2	27.2	92.888	0	323.31	737910000	122	23.4456	24.0426	23.8518	24.7636	24.2768	23.3469	23.1088	23.2836	21.6123	24.6538	23.6728	25.2025	21.8067	22.1576	23.7431	23.332	21.2498	23.3061	23.977	24.6991	24.4216	24.4603	26.0511	24.0776	24.8034
	0.6891	0.25691	Q9BVG4	Q9BVG4	Protein PBDC1	PBDC1	Color2 [DarkGray]	1	4					6	6	6	42.5	42.5	42.5	26.056	0	141.31	1029300000	140	25.7056	24.5789	NaN	25.1016	23.7903	24.9218	24.6057	24.9211	24.4659	24.5879	24.6285	24.5395	24.8488	24.6415	24.6588	NaN	22.7789	25.3757	24.895	23.9311	24.2445	24.5716	25.0511	25.2144	23.8425
	0.688951	0.149585	P22061;P22061-2	P22061;P22061-2	Protein-L-isoaspartate(D-aspartate) O-methyltransferase	PCMT1	Color2 [DarkGray]	1	4					4	4	4	35.2	35.2	35.2	24.636	0	323.31	1276300000	98	24.2816	25.4711	25.1363	25.2282	25.2346	25.1481	24.802	24.5647	24.8595	24.9695	24.9007	25.1704	24.9908	24.3115	24.5619	24.7388	24.4791	24.5398	25.4441	24.379	24.6528	24.9398	24.7224	24.8776	24.7698
	0.688068	0.157142	P30085-3;P30085;P30085-2	P30085-3;P30085;P30085-2	UMP-CMP kinase	CMPK1	Color2 [DarkGray]	1	4					7	7	7	36	36	36	25.855	0	323.31	3131700000	178	25.9888	26.2323	25.9588	26.4269	26.186	26.2901	26.4178	26.4137	26.1639	26.2597	26.2774	26.9845	26.2757	26.6937	25.8704	25.3411	25.3722	26.0785	26.1563	25.8651	26.6323	26.4688	25.9232	26.2977	26.355
	0.687721	-0.24393	Q9H0R4;Q9H0R4-2	Q9H0R4;Q9H0R4-2	Haloacid dehalogenase-like hydrolase domain-containing protein 2	HDHD2	Color2 [DarkGray]	1	4					5	5	5	23.9	23.9	23.9	28.536	0	44.796	769280000	115	24.8678	23.2559	24.2579	24.253	23.6649	23.7488	23.7629	24.3307	23.7155	24.2559	23.0892	23.8324	22.8594	23.1404	24.7439	23.5103	23.6842	23.9918	24.4744	23.5394	23.4859	24.4847	25.0976	24.5362	23.8699
	0.684488	0.40929	P28799-3;P28799;P28799-2	P28799-3;P28799;P28799-2	Granulins;Acrogranin;Paragranulin;Granulin-1;Granulin-2;Granulin-3;Granulin-4;Granulin-5;Granulin-6;Granulin-7	GRN	Color2 [DarkGray]	1	4					3	3	3	13.3	13.3	13.3	44.132	0.00027693	5.3022	346450000	32	23.3869	23.1716	23.0103	23.1584	23.7325	24.4301	24.0644	23.8736	24.1044	21.7481	NaN	23.3574	23.8145	NaN	NaN	21.6157	NaN	23.5031	23.8073	22.8023	24.4393	22.9477	23.7289	23.3786	23.7062
	0.684225	-0.168834	P17980	P17980	26S protease regulatory subunit 6A	PSMC3	Color2 [DarkGray]	1	4					16	16	16	52.2	52.2	52.2	49.203	0	323.31	3105500000	270	26.3202	26.9611	26.1468	26.2832	26.287	26.0011	25.5455	26.5082	25.5088	26.1657	25.4991	26.3748	25.8528	25.4746	25.8025	26.2521	26.7988	26.1696	26.5102	25.9351	25.5713	26.133	26.1804	26.0696	26.4479
	0.683952	-0.222912	Q86XP3-2;Q86XP3	Q86XP3-2;Q86XP3	ATP-dependent RNA helicase DDX42	DDX42	Color2 [DarkGray]	1	4					8	8	8	15.8	15.8	15.8	90.067	0	108.06	420640000	100	22.0757	22.7149	23.6399	23.5787	23.7319	23.4556	22.907	22.8596	22.021	23.7677	22.7053	23.709	23.1593	23.6567	23.7627	23.1969	23.0572	23.5692	23.0404	23.8437	23.5982	23.0232	23.2473	NaN	23.5008
	0.683562	0.462576	Q96HC4;Q96HC4-7;Q96HC4-4;Q96HC4-6;Q96HC4-3;Q96HC4-2;Q96HC4-5	Q96HC4;Q96HC4-7;Q96HC4-4;Q96HC4-6	PDZ and LIM domain protein 5	PDLIM5	Color2 [DarkGray]	1	4					7	7	7	20.8	20.8	20.8	63.944	0	173.93	678420000	133	23.3814	22.0098	25.7275	24.0777	24.2403	24.2906	23.9405	23.8121	24.577	24.1078	24.0898	23.96	24.5454	24.2944	23.7756	20.1326	24.1464	20.1006	24.5473	23.712	24.283	24.1304	23.7063	23.7176	23.9345
	0.68264	0.294416	P18859;P18859-2	P18859;P18859-2	ATP synthase-coupling factor 6, mitochondrial	ATP5J	Color2 [DarkGray]	1	4					3	3	3	44.4	44.4	44.4	12.587	0	323.31	1753800000	56	26.1253	25.5845	24.3957	26.0573	24.2763	24.7821	26.2245	26.1752	24.6907	25.4939	25.7979	25.0799	26.1941	25.3389	25.1317	24.4738	24.095	26.0837	25.3269	25.1694	25.003	24.7676	25.5618	25.8167	25.8175
	0.68241	-0.488163	P05771-2;P05771	P05771-2;P05771	Protein kinase C beta type	PRKCB	Color2 [DarkGray]	1	4					13	13	9	30.5	30.5	20.8	77.011	0	129.22	784320000	147	23.1591	25.2276	25.3558	23.4876	24.7335	21.7296	21.6581	24.7525	22.1876	24.1075	24.0365	23.6937	24.1391	20.5426	24.4554	22.4211	22.1671	23.6811	24.9585	24.5403	23.3035	24.5613	24.7469	23.433	24.4534
	0.68169	-0.154995	P54578-2;P54578-3;P54578	P54578-2;P54578-3;P54578	Ubiquitin carboxyl-terminal hydrolase 14	USP14	Color2 [DarkGray]	1	4					10	10	10	30.1	30.1	30.1	52.385	0	276.44	1761500000	176	24.8055	25.0251	25.4552	25.2815	25.069	25.305	24.8033	25.1779	25.0435	25.5418	24.2831	25.6538	25.1952	24.8355	25.5955	24.8005	24.3145	25.6509	25.657	25.2443	25.2115	25.8167	25.4538	25.2772	25.3098
	0.681157	0.296103	O60613;O60613-2	O60613	15 kDa selenoprotein	SEP15	Color2 [DarkGray]	1	4					3	3	3	32.7	32.7	32.7	18.092	0	27.421	403760000	37	24.9207	22.8071	NaN	23.9705	23.6698	23.8442	23.9952	23.8026	NaN	22.9159	23.3939	23.5605	23.5814	23.8437	23.3461	22.8775	22.5791	23.7796	24.0116	24.0356	23.455	23.8861	NaN	NaN	22.0704
	0.681148	0.244677	Q9NP61-2;Q9NP61	Q9NP61-2;Q9NP61	ADP-ribosylation factor GTPase-activating protein 3	ARFGAP3	Color2 [DarkGray]	1	4					3	3	3	9.3	9.3	9.3	51.989	0	14.977	111260000	30	NaN	NaN	22.0133	21.947	22.4185	NaN	22.1547	21.5174	NaN	22.3648	21.7993	22.517	22.3784	21.839	NaN	NaN	21.8336	NaN	21.7806	21.7533	22.5454	NaN	21.8307	NaN	22.215
	0.681056	-0.543229	Q9P2A4-2;Q9P2A4	Q9P2A4-2;Q9P2A4	ABI gene family member 3	ABI3	Color2 [DarkGray]	1	4					5	5	5	23.3	23.3	23.3	38.449	0	27.094	1105500000	55	24.1729	26.202	25.6764	24.493	25.2862	24.4358	24.1308	NaN	22.7998	NaN	23.1418	20.3329	25.6674	23.7755	23.9084	24.454	23.5663	25.5923	25.3458	24.9965	24.8185	24.9525	24.3502	24.8319	25.1432
	0.680968	0.381002	P11177;P11177-2;P11177-3	P11177;P11177-2;P11177-3	Pyruvate dehydrogenase E1 component subunit beta, mitochondrial	PDHB	Color2 [DarkGray]	1	4					9	9	9	34.5	34.5	34.5	39.233	0	101.31	1601300000	208	24.8912	24.6403	26.4432	25.2645	24.2485	25.4651	25.5056	25.4623	24.1412	25.2263	24.7154	25.0107	25.5942	24.8871	26.2475	22.9935	24.5599	24.3716	25.0265	25.2269	25.2819	25.052	24.5814	25.532	24.2006
	0.680701	-0.162869	P43243	P43243	Matrin-3	MATR3	Color2 [DarkGray]	1	4					9	9	6	16.8	16.8	10.6	94.622	0	323.31	10981000000	340	27.5733	28.2442	28.3692	27.8988	27.9842	27.4542	27.4409	27.2984	26.9778	28.0479	27.321	27.9885	27.1478	26.933	28.0634	28.0097	26.9522	27.5185	28.0891	27.8198	27.8821	27.4126	27.8276	28.095	28.0175
	0.68059	0.229413	O95319-5;O95319-2;O95319;O95319-4;O95319-3	O95319-5;O95319-2;O95319;O95319-4;O95319-3	CUGBP Elav-like family member 2	CELF2	Color2 [DarkGray]	1	4					7	7	6	19.3	19.3	17.2	52.054	0	95.181	1000800000	84	24.4656	24.5941	25.0438	25.1627	24.4548	23.969	24.7356	24.5177	NaN	24.6268	24.2121	24.7437	24.4909	23.6855	24.9389	23.8776	23.7636	24.701	24.8851	24.7011	23.8732	24.3191	24.6129	25.2392	24.4917
	0.679323	-0.513198	Q6P1X6-2;Q6P1X6	Q6P1X6-2;Q6P1X6	UPF0598 protein C8orf82	C8orf82	Color2 [DarkGray]	1	4					2	2	2	15.9	15.9	15.9	22.808	0	119.4	200570000	41	21.1629	23.3998	21.9366	19.9038	21.1732	21.4095	20.7233	20.6345	20.7914	20.6725	20.66	NaN	NaN	NaN	NaN	24.2554	23.7587	21.2767	21.4349	22.0801	22.9698	21.3214	NaN	21.5667	20.9721
	0.678813	-0.290749	Q8IYM9-2;Q8IYM9	Q8IYM9-2;Q8IYM9	E3 ubiquitin-protein ligase TRIM22	TRIM22	Color2 [DarkGray]	1	4					5	5	5	13.4	13.4	13.4	56.428	0	12.003	104320000	35	20.1034	21.5993	21.6975	NaN	NaN	21.3082	NaN	21.247	20.6962	22.4576	21.31	21.881	21.8825	NaN	22.8199	21.6631	21.7057	NaN	NaN	22.4887	NaN	21.4804	21.423	NaN	22.2614
	0.678489	-0.245082	P40429;Q6NVV1	P40429	60S ribosomal protein L13a	RPL13A	Color2 [DarkGray]	1	4					3	3	3	16.7	16.7	16.7	23.577	0	43.914	2280200000	325	24.8978	25.56	25.9126	26.466	25.9224	24.8813	25.0582	25.0138	24.4682	25.5141	24.7018	24.9494	25.1136	24.5442	25.4447	24.9638	24.9646	25.8098	26.0005	25.8126	24.2453	25.5518	25.6905	25.955	25.5749
	0.677828	0.240844	O60220	O60220	Mitochondrial import inner membrane translocase subunit Tim8 A	TIMM8A	Color2 [DarkGray]	1	4					3	3	3	56.7	56.7	56.7	10.998	0	206.06	1051700000	90	24.7674	25.2463	25.085	25.6213	25.4344	24.3257	25.0676	NaN	24.1499	24.3481	24.5621	24.0599	24.4366	24.0796	24.2241	24.6075	23.9122	24.5918	25.4525	23.7837	24.9325	24.7985	24.8886	24.9957	23.752
	0.677806	-0.168054	Q92499;Q92499-3;Q92499-2	Q92499;Q92499-3;Q92499-2	ATP-dependent RNA helicase DDX1	DDX1	Color2 [DarkGray]	1	4					15	15	15	31.1	31.1	31.1	82.431	0	323.31	4365600000	362	25.6978	26.4399	27.1905	26.5516	26.4219	26.3886	26.0937	26.4087	26.051	26.4542	26.6944	26.7166	26.3215	25.9665	26.6722	27.5159	27.1933	25.7252	26.3987	26.9249	26.1013	26.498	26.2581	26.3653	27.0807
	0.677561	-0.411133	Q96GS4	Q96GS4	Uncharacterized protein C17orf59	C17orf59	Color2 [DarkGray]	1	4					3	3	3	17.4	17.4	17.4	37.226	0	23.081	201130000	22	22.8376	20.6055	23.1458	23.5877	22.9223	NaN	NaN	NaN	NaN	NaN	21.4742	22.352	22.4149	NaN	21.8879	23.5053	NaN	23.7879	23.0738	21.9434	22.0837	22.8908	22.9053	22.6852	22.8187
	0.675389	0.912637	P40939	P40939	Trifunctional enzyme subunit alpha, mitochondrial;Long-chain enoyl-CoA hydratase;Long chain 3-hydroxyacyl-CoA dehydrogenase	HADHA	Color2 [DarkGray]	1	4					17	17	17	38.1	38.1	38.1	82.999	0	323.31	2585000000	368	NaN	23.2015	26.6391	23.5401	23.7927	26.4402	25.9261	26.3972	24.5156	25.7422	26.4677	25.5309	26.7798	26.5224	26.9648	25.7672	26.5044	22.9953	20.0327	27.0688	25.8015	25.2502	23.6467	22.7069	23.8021
	0.675241	-0.294703	Q6UN15;Q6UN15-3;Q6UN15-5;Q6UN15-4	Q6UN15;Q6UN15-3;Q6UN15-5;Q6UN15-4	Pre-mRNA 3-end-processing factor FIP1	FIP1L1	Color2 [DarkGray]	1	4					7	7	7	21.4	21.4	21.4	66.526	0	88.518	468670000	76	23.275	23.8852	24.0006	23.6859	NaN	22.4378	23.2966	23.1199	22.3758	23.3247	23.2474	23.2241	22.0851	22.3016	24.4764	25.0941	24.547	22.8276	23.3292	23.8224	23.1353	NaN	23.2797	23.5069	23.5169
	0.674843	0.21455	Q9H7Z7	Q9H7Z7	Prostaglandin E synthase 2;Prostaglandin E synthase 2 truncated form	PTGES2	Color2 [DarkGray]	1	4					4	4	4	20.4	20.4	20.4	41.943	0	169.54	243070000	65	22.4503	21.9452	23.6448	NaN	NaN	23.01	22.9612	22.3808	NaN	22.2928	23.4247	23.0499	23.3964	22.529	23.0135	22.5188	22.6394	22.4085	23.0259	23.0094	22.2294	22.6909	22.3455	22.4041	21.6412
	0.674772	0.134711	P61923;P61923-4;P61923-3;P61923-5;P61923-2	P61923;P61923-4;P61923-3;P61923-5;P61923-2	Coatomer subunit zeta-1	COPZ1	Color2 [DarkGray]	1	4					6	6	6	54.8	54.8	54.8	20.198	0	323.31	1969000000	183	25.1214	25.3902	25.3821	25.8335	26.2732	25.4073	25.7115	25.4446	24.9709	25.3028	25.3455	25.7402	25.0691	25.4552	25.3053	25.3408	25.7788	25.2067	25.4445	25.2315	25.1176	25.6422	24.8162	25.6623	25.5178
	0.674391	-0.427594	Q9H098;Q9H098-2	Q9H098;Q9H098-2	Protein FAM107B	FAM107B	Color2 [DarkGray]	1	4					2	2	2	20.6	20.6	20.6	15.558	0	102.55	1038400000	90	24.8143	23.9127	23.8138	25.0941	24.2656	22.8297	24.3446	25.1515	23.07	24.8531	24.1675	24.8729	21.1541	NaN	24.4777	24.4682	23.0225	24.822	25.3445	23.9853	23.6933	24.2374	25.6841	25.1681	24.6568
	0.674303	-0.353466	P41567	P41567	Eukaryotic translation initiation factor 1	EIF1	Color2 [DarkGray]	1	4					5	5	3	53.1	53.1	40.7	12.732	0	126.94	3313600000	143	26.7617	26.4871	25.7986	25.7691	25.6181	21.7784	26.7738	25.4424	26.1366	26.2218	25.5129	25.9015	26.4834	25.7338	26.0667	26.6645	25.7306	26.0991	25.5835	25.3138	25.8723	25.8566	25.8535	26.9588	26.1216
	0.673127	0.304918	Q9BVJ7	Q9BVJ7	Dual specificity protein phosphatase 23	DUSP23	Color2 [DarkGray]	1	4					5	5	5	39.3	39.3	39.3	16.588	0	21.248	785350000	74	24.172	24.2836	24.5333	24.9478	23.8401	24.0234	25.1824	23.6737	25.0168	23.8167	24.8188	24.2395	24.7841	24.5241	24.13	23.991	24.1484	NaN	24.9165	23.5831	23.8285	24.2244	24.2389	25.1045	24.2932
	0.672277	0.233348	O00161;O00161-2	O00161;O00161-2	Synaptosomal-associated protein 23	SNAP23	Color2 [DarkGray]	1	4					5	5	5	32.7	32.7	32.7	23.354	0	128	3190500000	201	27.1461	26.5714	25.6721	26.3588	26.6308	26.0768	26.5359	26.4368	25.5769	25.699	25.806	25.3122	26.5542	25.952	24.6272	26.0019	25.3736	26.9772	26.3199	25.7231	25.8505	25.8474	26.0941	25.8933	25.9527
	0.672112	-0.224841	P29083	P29083	General transcription factor IIE subunit 1	GTF2E1	Color2 [DarkGray]	1	4					4	4	4	12.5	12.5	12.5	49.452	0	30	107160000	50	20.8844	NaN	21.8949	21.6601	NaN	21.974	21.6112	21.1554	NaN	21.9366	21.2933	21.8543	21.6678	NaN	21.5602	NaN	NaN	21.7236	NaN	22.1075	21.1822	22.2205	21.7636	23.2704	21.6413
	0.670263	-0.321347	Q9Y2X7-3;Q9Y2X7;Q9Y2X7-2	Q9Y2X7-3;Q9Y2X7	ARF GTPase-activating protein GIT1	GIT1	Color2 [DarkGray]	1	4					7	7	6	15.5	15.5	13.5	85.445	0	323.31	332900000	38	21.2979	23.6924	23.4961	22.5377	23.7194	22.6929	NaN	NaN	22.2051	23.5211	22.4397	23.0357	22.5643	23.0076	23.4167	23.2104	22.7854	21.8263	22.4644	24.0613	23.9675	NaN	23.2862	NaN	24.2193
	0.670135	-0.361874	Q92896;Q92896-3;Q92896-2	Q92896;Q92896-3;Q92896-2	Golgi apparatus protein 1	GLG1	Color2 [DarkGray]	1	4					6	6	6	7	7	7	134.55	0	25.685	801850000	77	23.4399	22.5807	24.7079	22.9478	NaN	24.4152	23.7438	23.57	24.1326	24.6782	24.6756	24.1252	23.9218	25.1732	25.153	23.4312	25.363	NaN	NaN	25.0459	24.9205	24.0493	NaN	23.2727	23.8668
	0.669628	-0.542558	O75746;O75746-2	O75746;O75746-2	Calcium-binding mitochondrial carrier protein Aralar1	SLC25A12	Color2 [DarkGray]	1	4					9	9	9	20.9	20.9	20.9	74.761	0	32.441	287890000	63	20.712	NaN	24.1648	NaN	NaN	22.547	22.9423	22.4158	20.3435	22.9703	23.322	22.5235	22.4305	22.2425	23.7769	23.486	22.8126	NaN	21.012	25.1664	22.5541	NaN	21.4653	NaN	NaN
	0.669399	0.365919	P23469-3;P23469-2;P23469	P23469-3;P23469-2;P23469	Receptor-type tyrosine-protein phosphatase epsilon	PTPRE	Color2 [DarkGray]	1	4					8	8	8	16.1	16.1	16.1	71.381	0	96.414	543870000	149	21.669	23.2914	23.4037	24.4065	23.4005	24.8391	24.483	24.5271	23.7595	22.884	24.1845	23.2412	23.4013	24.2675	23.7298	23.8418	22.0255	24.3382	21.2314	24.4874	23.6305	23.5645	23.0966	23.8839	23.1039
	0.6689	-0.374368	O14920;O14920-4;O14920-2	O14920;O14920-4;O14920-2	Inhibitor of nuclear factor kappa-B kinase subunit beta	IKBKB	Color2 [DarkGray]	1	4					5	5	3	9.9	9.9	6.3	86.563	0	323.31	412940000	61	22.6179	23.8204	23.0376	21.5044	24.0039	22.257	21.8114	22.9293	22.8857	22.6281	22.3348	24.3122	21.8777	22.0016	22.2473	25.3406	21.2267	22.5352	22.8634	22.9408	23.8049	24.1946	22.6284	23.1943	23.0242
	0.665893	-0.247065	P31946-2;P31946	P31946-2;P31946	14-3-3 protein beta/alpha;14-3-3 protein beta/alpha, N-terminally processed	YWHAB	Color2 [DarkGray]	1	4					14	8	8	67.2	46.3	46.3	27.85	0	323.31	24723000000	536	29.2428	30.0761	28.2841	28.3084	28.1153	28.1472	28.3592	29.2852	28.3507	28.7101	28.5611	28.4883	28.8557	27.9444	28.4875	30.317	29.0138	28.7027	28.6016	28.5814	29.401	28.7114	28.7565	28.9969	29.1795
	0.66551	-0.195626	Q96KG9-5;Q96KG9-3;Q96KG9-4;Q96KG9-6;Q96KG9-2;Q96KG9	Q96KG9-5;Q96KG9-3;Q96KG9-4;Q96KG9-6;Q96KG9-2;Q96KG9	N-terminal kinase-like protein	SCYL1	Color2 [DarkGray]	1	4					4	4	4	12.8	12.8	12.8	69.237	0	5.4676	269700000	32	NaN	NaN	22.841	22.8312	NaN	23.0061	22.5386	22.7029	23.2778	22.9648	22.9944	NaN	23.3196	NaN	23.2901	NaN	22.5821	22.9576	22.9036	23.4287	NaN	23.0935	23.4825	NaN	NaN
	0.663392	-0.843742	P56279	P56279	T-cell leukemia/lymphoma protein 1A	TCL1A	Color2 [DarkGray]	1	4					6	6	6	70.2	70.2	70.2	13.459	0	323.31	15995000000	248	25.6946	29.0945	29.7192	28.8131	30.0146	26.3831	23.2751	26.649	24.5619	28.9363	23.1931	24.8362	28.1069	NaN	29.0531	27.4526	26.6632	26.1755	30.2189	27.4269	28.545	30.3688	27.8162	29.5318	29.4161
	0.661842	0.260241	Q9H9A6	Q9H9A6	Leucine-rich repeat-containing protein 40	LRRC40	Color2 [DarkGray]	1	4					7	7	7	15.1	15.1	15.1	68.249	0	15.601	246160000	58	21.5805	24.2561	23.0632	23.245	23.2038	22.8574	22.8904	21.8851	NaN	NaN	22.1941	23.2767	22.4294	NaN	22.1888	21.4968	22.9598	23.1167	23.1333	22.5387	22.6801	NaN	22.2953	22.9166	22.5391
	0.660655	-0.213437	Q00577	Q00577	Transcriptional activator protein Pur-alpha	PURA	Color2 [DarkGray]	1	4					6	6	6	37.3	37.3	37.3	34.91	0	155.69	2363300000	148	25.2616	25.7658	26.1527	25.6824	24.6765	25.3269	25.9735	25.502	25.9296	25.8177	25.5268	25.6902	25.6156	24.7285	25.5907	26.8291	25.9765	25.8279	26.0547	25.6205	24.6369	25.5316	26.0014	26.6701	25.62
	0.659774	-0.362388	Q9NRD1	Q9NRD1	F-box only protein 6	FBXO6	Color2 [DarkGray]	1	4					4	4	4	24.6	24.6	24.6	33.932	0	18.311	572430000	29	NaN	23.1315	NaN	23.3363	23.6624	24.7629	NaN	24.9524	22.8022	23.4442	23.6664	23.9382	24.2221	21.7688	23.3568	26.0693	NaN	23.4574	23.376	23.8437	24.1392	24.0161	24.1501	23.1937	24.1552
	0.657854	-0.256497	P68366-2;P68366	P68366-2;P68366	Tubulin alpha-4A chain	TUBA4A	Color2 [DarkGray]	1	4					20	4	4	60	12.5	12.5	48.328	0	48.203	6342200000	219	26.7391	27.4658	27.9114	27.3873	27.4725	25.5621	27.1162	26.8265	26.1834	27.5189	26.9606	27.4153	26.0891	26.1412	27.5013	26.7883	26.28	27.4663	27.9767	26.9535	26.2899	27.0911	27.2227	27.4571	27.323
	0.656429	-0.273924	Q14161-6;Q14161-3;Q14161;Q14161-11;Q14161-7;Q14161-4;Q14161-5;Q14161-2;Q14161-9;Q14161-10;Q14161-8	Q14161-6;Q14161-3;Q14161;Q14161-11;Q14161-7;Q14161-4;Q14161-5;Q14161-2;Q14161-9;Q14161-10;Q14161-8	ARF GTPase-activating protein GIT2	GIT2	Color2 [DarkGray]	1	4					7	6	6	24.4	22.1	22.1	73.402	0	205.73	382220000	86	22.4135	22.8663	23.3344	22.8048	23.6908	21.7124	22.2008	22.9794	21.5848	23.6311	22.0344	23.9404	23.8134	23.0745	23.2874	22.1674	24.1739	23.5466	23.0037	23.5939	23.6794	23.974	22.6755	NaN	23.3789
	0.653743	0.479768	Q8IXT5	Q8IXT5	RNA-binding protein 12B	RBM12B	Color2 [DarkGray]	1	4					4	4	4	4.6	4.6	4.6	118.1	0.00026525	4.3594	105150000	23	NaN	23.3062	22.5686	22.2028	22.9311	21.4991	NaN	NaN	NaN	20.4196	20.4724	21.7572	21.653	NaN	NaN	20.6814	22.0938	NaN	22.3925	21.0701	22.025	22.2193	NaN	21.2636	21.9747
	0.653265	0.332112	O00273;O00273-2	O00273;O00273-2	DNA fragmentation factor subunit alpha	DFFA	Color2 [DarkGray]	1	4					6	6	6	32.6	32.6	32.6	36.521	0	66.424	487510000	52	22.9809	25.0141	23.5888	23.2686	23.3098	23.994	24.059	22.8641	NaN	23.2507	24.1365	23.5036	23.9705	NaN	23.1861	23.5522	24.3479	23.4228	23.5118	22.8986	23.5225	23.6445	23.4772	NaN	23.5066
	0.653054	0.284766	P50897;P50897-2	P50897	Palmitoyl-protein thioesterase 1	PPT1	Color2 [DarkGray]	1	4					7	7	7	37.3	37.3	37.3	34.193	0	87.009	1866900000	122	26.883	24.8374	24.6992	26.1246	25.1617	26.1996	25.9746	25.8679	25.3705	24.7682	25.539	25.4773	26.2118	25.251	24.9839	24.5339	24.0013	25.9206	25.5504	24.7035	25.8925	25.4017	26.3213	25.8417	25.2859
	0.652661	0.401121	Q8NHP8;Q8NHP8-2	Q8NHP8;Q8NHP8-2	Putative phospholipase B-like 2;Putative phospholipase B-like 2 32 kDa form;Putative phospholipase B-like 2 45 kDa form	PLBD2	Color2 [DarkGray]	1	4					3	3	3	6.3	6.3	6.3	65.471	0	40.512	271960000	65	23.7687	23.7894	21.7188	22.9154	NaN	23.3822	21.9246	23.3224	22.3458	21.4524	21.7226	NaN	22.4399	21.4825	NaN	23.0437	23.1828	23.3458	21.6028	21.8943	21.7855	22.0425	22.32	22.9336	21.721
	0.651895	0.267312	Q6QNY1;Q6QNY1-2	Q6QNY1	Biogenesis of lysosome-related organelles complex 1 subunit 2	BLOC1S2	Color2 [DarkGray]	1	4					5	5	5	54.2	54.2	54.2	15.961	0	25.618	697530000	61	24.4854	24.6938	24.0053	24.573	25.0791	23.8274	24.9133	24.4543	24.1015	24.2114	23.2731	24.0645	23.9947	NaN	24.3104	NaN	22.7583	23.8927	24.8433	24.3429	24.0364	24.491	24.0875	24.1371	NaN
	0.651441	0.142945	O00231;O00231-2	O00231;O00231-2	26S proteasome non-ATPase regulatory subunit 11	PSMD11	Color2 [DarkGray]	1	4					10	10	10	32.2	32.2	32.2	47.463	0	323.31	4498600000	259	26.8681	27.0393	26.9074	27.1213	27.5162	27.0916	26.6487	27.1089	26.4241	26.5382	26.3269	26.7438	26.3948	26.3086	26.4866	26.449	26.5025	27.2211	27.1336	26.4603	26.1307	26.7121	26.9518	26.7353	26.7645
	0.651363	-0.433877	P20702;Q13349	P20702	Integrin alpha-X	ITGAX	Color2 [DarkGray]	1	4					17	17	17	25.4	25.4	25.4	127.83	0	124.91	1081200000	145	25.6871	24.2668	25.8732	22.8339	23.3707	23.6258	NaN	22.6931	23.6761	24.8044	24.5339	25.5922	22.7864	NaN	24.6921	24.4132	NaN	23.1896	25.4987	26.2862	23.2577	24.5953	26.0017	24.5795	24.9038
	0.650419	0.212587	P07737	P07737	Profilin-1	PFN1	Color2 [DarkGray]	1	4					13	13	9	87.9	87.9	70	15.054	0	323.31	258270000000	4203	33.0866	32.4263	32.2441	32.5151	32.4171	31.9813	32.1095	32.8242	31.7241	32.243	31.7363	32.1454	32.2148	31.3875	32.3352	31.4171	31.181	32.6295	32.5451	31.9843	31.7172	32.777	32.3413	32.7103	32.2234
	0.65039	-0.331585	Q96BY6;Q96BY6-3;Q96BY6-2	Q96BY6;Q96BY6-3	Dedicator of cytokinesis protein 10	DOCK10	Color2 [DarkGray]	1	4					14	14	14	10.8	10.8	10.8	249.53	0	175.14	1109100000	169	23.7126	25.4605	24.6612	24.4203	25.1117	23.8931	23.5355	24.8762	22.47	24.855	23.975	24.5933	24.6356	NaN	25.0005	22.9977	23.9547	25.1643	25.2142	25.1528	25.8526	24.9111	24.6319	25.0845	25.4297
	0.650145	0.237946	Q16718;Q16718-2	Q16718;Q16718-2	NADH dehydrogenase [ubiquinone] 1 alpha subcomplex subunit 5	NDUFA5	Color2 [DarkGray]	1	4					5	5	5	57.8	57.8	57.8	13.459	0	78.47	593730000	86	24.2791	22.7358	24.3232	23.5298	NaN	24.0885	NaN	23.8534	23.4866	23.5808	23.5089	24.187	24.4389	23.1653	23.8346	24.098	24.6374	23.8818	23.7456	23.8952	23.5093	23.6802	23.3479	23.7209	22.5934
	0.64999	0.58505	P98082;P98082-3;P98082-2	P98082;P98082-3;P98082-2	Disabled homolog 2	DAB2	Color2 [DarkGray]	1	4					7	7	7	12.9	12.9	12.9	82.447	0	41.052	188650000	44	NaN	NaN	NaN	23.0581	22.5136	21.3418	24.4053	20.1462	23.5417	22.9658	23.144	20.8379	21.1489	25.699	NaN	22.3579	22.5301	NaN	NaN	22.4825	22.439	22.0858	NaN	NaN	22.4525
	0.649884	0.275633	P63279	P63279	SUMO-conjugating enzyme UBC9	UBE2I	Color2 [DarkGray]	1	4					3	3	3	33.5	33.5	33.5	18.007	0	13.514	797870000	49	25.0601	25.8321	24.7479	24.4347	23.8243	23.9046	23.9583	24.3155	NaN	25.3961	23.7786	23.5095	23.8513	NaN	25.1906	24.1051	23.4544	23.8195	24.7743	NaN	25.1139	23.8589	24.4562	24.9721	23.9452
	0.64956	0.391127	Q5TEJ8;Q5TEJ8-3;Q5TEJ8-5;Q5TEJ8-6;Q5TEJ8-2;Q5TEJ8-4	Q5TEJ8;Q5TEJ8-3;Q5TEJ8-5;Q5TEJ8-6	Protein THEMIS2	THEMIS2	Color2 [DarkGray]	1	4					12	12	12	31.6	31.6	31.6	72.048	0	62.936	1002100000	190	23.9095	22.2753	24.789	24.0758	24.4354	25.212	24.5616	24.9399	24.9484	24.1021	24.0984	25.0375	25.825	24.485	24.4925	23.061	22.3737	25.1448	24.2313	25.5503	24.6576	24.2682	23.266	24.4709	24.7083
	0.649049	-0.286181	Q9H9B4	Q9H9B4	Sideroflexin-1	SFXN1	Color2 [DarkGray]	1	4					6	5	5	33.2	27.3	27.3	35.619	0	266.7	1327100000	88	24.3925	24.3557	25.475	24.7321	25.6002	24.1579	24.9043	25.0746	23.4749	24.8751	24.9784	25.4274	23.6645	23.6837	25.4703	24.6798	23.7096	25.2166	25.0155	25.4829	24.4452	25.8368	25.0271	24.1053	24.3038
	0.64877	0.218486	O95793-2;O95793-3;O95793	O95793-2;O95793-3;O95793	Double-stranded RNA-binding protein Staufen homolog 1	STAU1	Color2 [DarkGray]	1	4					3	3	3	8.7	8.7	8.7	54.933	0	162.24	342540000	72	22.4068	22.649	22.9128	23.4903	23.7892	NaN	23.3354	22.5098	22.8792	23.3196	23.4686	23.1489	23.1484	24.5825	22.712	22.0054	NaN	23.4306	22.9681	22.6893	23.4646	22.859	23.3084	23.0089	22.4002
	0.64825	0.290162	O00165-5;O00165;O00165-2;O00165-4;O00165-6;O00165-3	O00165-5;O00165;O00165-2;O00165-4;O00165-6;O00165-3	HCLS1-associated protein X-1	HAX1	Color2 [DarkGray]	1	4					2	2	2	13.4	13.4	13.4	26.099	0	36.26	188170000	30	NaN	NaN	23.7939	23.0503	23.3704	23.0759	23.4762	NaN	22.7922	22.6579	22.625	22.8493	22.5619	22.3896	NaN	NaN	21.1463	NaN	23.4287	22.8934	22.9919	23.4	NaN	22.8209	22.1212
	0.648113	-0.276877	P55263-2;P55263;P55263-4;P55263-3	P55263-2;P55263;P55263-4;P55263-3	Adenosine kinase	ADK	Color2 [DarkGray]	1	4					8	8	8	35.9	35.9	35.9	38.703	0	199.89	566920000	120	23.4266	23.624	23.4392	22.4297	23.3983	22.9047	NaN	23.0919	23.1513	24.0332	23.0858	23.3362	23.4165	NaN	25.2842	23.6779	23.624	22.6858	23.499	23.8942	23.8852	24.5913	23.8609	23.8295	23.8003
	0.648024	0.412907	P78324-4;P78324;P78324-2;Q5TFQ8	P78324-4;P78324;P78324-2	Tyrosine-protein phosphatase non-receptor type substrate 1	SIRPA	Color2 [DarkGray]	1	4					5	5	5	17.7	17.7	17.7	54.851	0	27.497	560440000	53	24.9895	NaN	22.7099	24.5498	24.445	24.5913	24.0935	24.5281	24.8274	22.4106	23.9517	23.8856	NaN	24.4165	NaN	24.8734	NaN	24.7895	23.115	24.7499	NaN	NaN	23.8351	22.4177	23.6344
	0.647983	-0.345123	Q9H1E5	Q9H1E5	Thioredoxin-related transmembrane protein 4	TMX4	Color2 [DarkGray]	1	4					3	3	3	11.5	11.5	11.5	38.952	0	7.5516	243100000	46	NaN	NaN	23.3027	NaN	23.6381	23.205	NaN	22.5422	21.4889	23.0241	NaN	22.18	NaN	22.5156	24.0844	NaN	22.4863	NaN	NaN	23.4162	22.983	23.6741	22.7352	22.3715	23.2058
	0.646101	0.320857	P27105;P27105-2	P27105;P27105-2	Erythrocyte band 7 integral membrane protein	STOM	Color2 [DarkGray]	1	4					6	6	6	33.7	33.7	33.7	31.73	0	323.31	4485700000	217	26.9317	24.9219	26.3429	26.3137	25.9514	27.5796	27.9294	27.9222	27.2864	25.6806	26.509	26.4383	26.9496	26.4201	26.2392	25.4557	25.9461	27.0025	26.1362	27.3643	24.7894	26.3414	26.427	25.8422	26.1956
	0.645243	-0.335242	P18621-2;P18621;P18621-3	P18621-2;P18621;P18621-3	60S ribosomal protein L17	RPL17	Color2 [DarkGray]	1	4					4	4	4	30.8	30.8	30.8	17.094	0	89.672	2639200000	75	25.6626	25.4062	27.1485	25.7357	25.5775	26.1535	24.9436	25.2979	26.0883	25.7269	23.2946	NaN	25.3278	26.2767	25.3933	27.2887	25.7609	25.6617	26.8994	26.3117	26.046	26.9198	25.0658	26.04	25.632
	0.644689	0.176112	P20338	P20338	Ras-related protein Rab-4A	RAB4A	Color2 [DarkGray]	1	4					6	6	4	42.7	42.7	32.1	24.389	0	83.126	342160000	69	23.2182	23.1968	23.63	23.0611	23.6995	23.1729	23.1297	23.2465	23.5028	22.506	23.3938	22.0658	23.4059	22.8203	22.922	22.6348	22.3687	23.5986	23.4939	23.067	23.116	22.9872	22.2869	23.086	22.9835
	0.644458	-0.262669	Q15628;Q15628-2	Q15628;Q15628-2	Tumor necrosis factor receptor type 1-associated DEATH domain protein	TRADD	Color2 [DarkGray]	1	4					10	10	10	44.9	44.9	44.9	34.247	0	177.29	1503000000	164	23.6826	26.1736	25.5989	25.6441	25.3098	24.5983	25.0423	24.9104	24.1328	24.7214	24.0738	25.346	24.8127	22.9528	24.3525	25.5645	25.8101	24.9533	25.4953	24.9933	24.5896	25.3561	25.0246	25.6072	25.1552
	0.64183	0.702178	Q9NY15;Q9NY15-2	Q9NY15	Stabilin-1	STAB1	Color2 [DarkGray]	1	4					17	17	17	11.1	11.1	11.1	275.48	0	206.07	717130000	104	22.7485	NaN	22.3318	25.2312	23.9443	25.4449	25.9015	NaN	25.9898	21.7236	25.7129	22.4779	21.8787	26.5227	22.3814	23.9996	25.9847	23.1696	22.0717	22.5535	24.6211	22.3297	NaN	NaN	24.3159
	0.641305	0.248608	Q96AT9-2;Q96AT9;Q96AT9-5;Q96AT9-3;Q96AT9-4;Q2QD12	Q96AT9-2;Q96AT9;Q96AT9-5;Q96AT9-3;Q96AT9-4	Ribulose-phosphate 3-epimerase	RPE	Color2 [DarkGray]	1	4					3	3	3	21.4	21.4	21.4	23.924	0	73.501	864350000	99	24.7267	25.8701	23.667	24.6415	24.6932	24.404	24.8871	24.1144	24.536	24.151	24.5265	23.8716	24.1963	23.685	23.3116	24.9674	24.275	24.6515	24.2013	22.5741	24.3772	24.3223	24.6837	24.922	23.8037
	0.640742	-0.3689	Q96IV0-3;Q96IV0-2;Q96IV0;Q96IV0-5	Q96IV0-3;Q96IV0-2;Q96IV0;Q96IV0-5	Peptide-N(4)-(N-acetyl-beta-glucosaminyl)asparagine amidase	NGLY1	Color2 [DarkGray]	1	4					4	4	4	13.8	13.8	13.8	63.827	0	49.496	140480000	33	NaN	21.5384	NaN	22.0155	NaN	21.8041	NaN	21.5345	21.1805	22.1835	21.2564	NaN	21.6319	NaN	21.898	22.3799	24.1924	22.5195	NaN	21.5297	22.5415	NaN	NaN	22.1472	21.9939
	0.640231	-0.233622	P09417;P09417-2	P09417;P09417-2	Dihydropteridine reductase	QDPR	Color2 [DarkGray]	1	4					5	5	5	34	34	34	25.789	0	323.31	371580000	43	23.9187	NaN	22.8709	23.5291	22.224	22.2362	24.1703	23.2785	23.6688	23.1033	NaN	22.9038	22.4829	23.2005	22.9478	23.0387	22.9285	24.4194	NaN	22.5489	23.1016	23.721	23.2743	23.8653	22.9857
	0.640149	0.252768	Q3YEC7;Q3YEC7-2;Q3YEC7-3;Q3YEC7-4;Q3YEC7-6	Q3YEC7;Q3YEC7-2	Rab-like protein 6	RABL6	Color2 [DarkGray]	1	4					6	6	6	14.1	14.1	14.1	79.548	0	117.77	702300000	112	23.6784	25.479	22.5117	23.9506	25.0323	23.0644	23.9214	24.0121	24.1194	23.9429	24.0352	24.1098	24.088	23.0176	23.7775	24.108	24.6622	23.4675	22.8776	23.7639	22.832	24.1287	23.8571	23.9347	23.6559
	0.639816	0.422483	Q07666-3;Q07666;Q07666-2	Q07666-3;Q07666;Q07666-2	KH domain-containing, RNA-binding, signal transduction-associated protein 1	KHDRBS1	Color2 [DarkGray]	1	4					3	3	3	18.3	18.3	18.3	44.027	0	31.09	837560000	70	24.3968	25.6597	24.361	24.2407	24.0306	24.2391	24.1827	23.9811	24.1166	24.8761	24.0383	24.8096	24.075	23.7396	25.1819	20.2232	NaN	23.271	25.2034	23.7548	24.922	22.2758	25.2227	25.0696	24.3002
	0.639643	0.349912	P16401	P16401	Histone H1.5	HIST1H1B	Color2 [DarkGray]	1	4					3	3	3	16.4	16.4	16.4	22.58	0	172.52	17323000000	67	28.9679	28.4358	29.0179	28.4818	27.9611	27.9418	28.9613	29.3554	27.4898	29.5444	29.0286	29.6712	27.2382	28.9148	28.9749	28.4332	27.2659	28.3271	27.8584	27.5462	27.3442	29.5643	29.1234	28.2861	27.9088
	0.639405	0.633284	P61769	P61769	Beta-2-microglobulin;Beta-2-microglobulin form pI 5.3	B2M	Color2 [DarkGray]	1	4					3	3	3	37.8	37.8	37.8	13.714	0	98.848	1387100000	74	26.5092	22.3231	24.6903	25.0959	24.2071	25.9072	24.9451	26.0764	25.5128	25.106	25.3237	24.8978	25.1801	22.8724	25.5134	22.8001	25.173	25.6854	25.3052	26.1346	23.684	24.6688	25.2463	25.8921	25.6946
	0.639016	-0.236193	P41226	P41226	Ubiquitin-like modifier-activating enzyme 7	UBA7	Color2 [DarkGray]	1	4					13	13	13	21.8	21.8	21.8	111.69	0	323.31	2256700000	258	25.6527	25.5964	26.0451	25.9063	26.6235	25.6221	24.5361	25.8447	25.2186	25.8459	24.7726	25.835	26.0194	23.5187	25.493	25.4114	24.9435	26.3363	26.1566	25.7997	25.7974	25.6536	25.9641	26.1473	25.8768
	0.638689	-0.210613	Q9UPN7	Q9UPN7	Serine/threonine-protein phosphatase 6 regulatory subunit 1	PPP6R1	Color2 [DarkGray]	1	4					12	12	12	28.6	28.6	28.6	96.723	0	105.46	1813500000	195	25.8068	24.6491	25.9249	25.6323	25.8717	25.0245	25.4137	25.2697	24.8352	25.5145	24.8987	25.4968	25.2046	23.9886	24.9701	25.2119	25.1314	25.9387	25.171	25.0231	25.4076	25.8862	25.6155	25.9405	25.7302
	0.638613	0.185897	P54922	P54922	[Protein ADP-ribosylarginine] hydrolase	ADPRH	Color2 [DarkGray]	1	4					3	3	3	12	12	12	39.506	0	16.57	262840000	38	22.7498	22.6308	23.3588	23.027	23.2072	22.3861	NaN	22.641	22.7267	23.0892	NaN	NaN	22.2359	22.0422	23.2869	NaN	22.3101	22.859	23.4397	23.0198	22.7457	22.9482	22.3104	NaN	23.0263
	0.638127	-0.281769	Q12907	Q12907	Vesicular integral-membrane protein VIP36	LMAN2	Color2 [DarkGray]	1	4					4	4	4	21.9	21.9	21.9	40.228	0	29.772	523730000	54	NaN	NaN	22.2286	23.1528	22.6291	24.1135	24.0681	23.1323	23.9772	23.1999	24.0436	23.6406	23.1669	24.5378	23.1601	24.4839	22.9501	NaN	NaN	24.4972	23.6828	23.2123	23.4405	NaN	23.2631
	0.637449	0.482377	O60568	O60568	Procollagen-lysine,2-oxoglutarate 5-dioxygenase 3	PLOD3	Color2 [DarkGray]	1	4					9	9	9	19.8	19.8	19.8	84.784	0	88.932	339760000	55	21.8568	22.045	NaN	22.0501	21.1498	23.4516	25.0671	24.0092	24.187	22.8376	24.0855	22.6264	23.9217	24.6143	22.4095	20.2882	23.574	21.5667	NaN	24.2175	23.4298	22.0384	23.3613	NaN	23.1584
	0.63712	-0.258341	O15067	O15067	Phosphoribosylformylglycinamidine synthase	PFAS	Color2 [DarkGray]	1	4					21	21	21	30.2	30.2	30.2	144.73	0	323.31	1885500000	213	25.5215	25.6128	25.6324	25.742	25.7464	26.0121	25.1405	24.5337	24.4656	25.852	24.6916	25.4242	23.2631	24.9983	26.0315	25.6376	25.4362	25.2302	25.8322	25.6362	25.4708	26.3259	26.0539	25.4125	25.6913
	0.635743	0.145783	P23258;Q9NRH3	P23258;Q9NRH3	Tubulin gamma-1 chain;Tubulin gamma-2 chain	TUBG1;TUBG2	Color2 [DarkGray]	1	4					11	11	11	44.3	44.3	44.3	51.169	0	51.557	694280000	110	23.7584	23.579	24.3063	23.8534	24.4668	24.2284	24.0044	23.8467	24.2456	24.1139	24.0606	23.8555	24.3431	23.9362	23.7516	23.8331	22.9865	24.5904	23.7002	24.3922	24.2652	23.2447	23.8649	24.1539	24.0108
	0.635646	0.283789	Q9H4A3-2;Q9H4A3;Q9H4A3-5;Q9H4A3-6;Q9H4A3-7;Q9H4A3-4;Q96J92-2;Q96J92-3;Q96J92	Q9H4A3-2;Q9H4A3;Q9H4A3-5;Q9H4A3-6;Q9H4A3-7;Q9H4A3-4	Serine/threonine-protein kinase WNK1	WNK1	Color2 [DarkGray]	1	4					7	7	6	5.6	5.6	5.2	225.56	0	12.108	261190000	35	23.7029	22.9469	23.5179	23.1921	23.2733	NaN	NaN	22.7603	NaN	23.5242	NaN	23.8173	23.6234	NaN	NaN	21.8612	22.344	23.05	NaN	22.6229	NaN	23.5485	NaN	23.4022	23.3286
	0.635324	-0.222708	Q9BXJ9;Q9BXJ9-4;Q6N069-5;Q6N069-4;Q6N069-3;Q6N069-2;Q6N069	Q9BXJ9;Q9BXJ9-4	N-alpha-acetyltransferase 15, NatA auxiliary subunit	NAA15	Color2 [DarkGray]	1	4					4	4	4	9	9	9	101.27	0	175.97	216910000	64	NaN	22.5023	22.2794	22.6358	23.0746	22.5396	21.9079	21.6189	NaN	22.358	21.9053	22.377	22.6858	NaN	21.9163	NaN	23.6871	23.018	22.689	22.4234	21.8397	22.7845	22.5452	NaN	22.6895
	0.633657	0.292777	Q9NRF9	Q9NRF9	DNA polymerase epsilon subunit 3	POLE3	Color2 [DarkGray]	1	4					2	2	2	23.1	23.1	23.1	16.859	0.000257	3.8269	599180000	40	24.2095	24.3406	24.2468	24.8159	25.2855	24.1401	24.044	23.7753	23.3869	23.8192	23.3719	24.0101	24.2964	NaN	23.1646	22.8927	NaN	24.6481	25.0097	23.2064	23.7994	24.6571	NaN	24.6228	23.626
	0.633428	-0.254991	Q9NR46;Q9NR46-2	Q9NR46;Q9NR46-2	Endophilin-B2	SH3GLB2	Color2 [DarkGray]	1	4					5	5	5	15.7	15.7	15.7	43.973	0	73.774	607320000	76	23.5714	24.0864	24.3719	NaN	24.7948	23.1611	23.2653	23.0264	23.368	24.0586	23.0175	23.7942	23.4961	22.3286	24.051	24.3941	23.6168	23.482	25.2006	23.211	23.8562	24.4456	23.5844	23.7734	23.4651
	0.632384	0.250247	O43586-2;O43586	O43586-2;O43586	Proline-serine-threonine phosphatase-interacting protein 1	PSTPIP1	Color2 [DarkGray]	1	4					5	5	5	24.7	24.7	24.7	45.353	0	11.568	261600000	36	22.8646	NaN	22.9011	23.1296	23.724	NaN	NaN	23.6442	23.5248	22.752	23.4449	23.1314	23.5034	22.5965	NaN	22.4707	NaN	22.1829	22.9776	22.4398	22.4235	22.4029	22.8669	NaN	23.7549
	0.631581	0.205857	Q9NRV9	Q9NRV9	Heme-binding protein 1	HEBP1	Color2 [DarkGray]	1	4					2	2	2	17.5	17.5	17.5	21.097	0	5.8454	756360000	45	24.5749	24.4808	24.1631	24.4859	24.1836	NaN	24.5831	25.335	25.6064	23.4529	24.5725	23.7871	24.7928	25.3623	24.2191	NaN	NaN	24.7647	NaN	23.5309	24.2891	24.4232	24.4032	23.8734	24.5002
	0.631118	-0.191212	P38919	P38919	Eukaryotic initiation factor 4A-III;Eukaryotic initiation factor 4A-III, N-terminally processed	EIF4A3	Color2 [DarkGray]	1	4					11	10	10	39.9	36	36	46.871	0	323.31	2007100000	191	24.998	25.8197	25.7543	26.1617	25.6832	25.2423	25.2712	25.0825	24.5967	25.7792	25.0578	25.6846	24.865	24.4206	26.0889	25.784	25.4842	24.9915	25.3371	26.0736	24.9217	25.4929	25.8265	25.8865	26.1791
	0.630525	0.434194	P02545;P02545-5;P02545-4;P02545-3;P02545-2;P02545-6	P02545;P02545-5;P02545-4;P02545-3;P02545-2;P02545-6	Prelamin-A/C;Lamin-A/C	LMNA	Color2 [DarkGray]	1	4					11	11	11	22.7	22.7	22.7	74.139	0	323.31	15093000000	239	27.1179	27.6725	29.3201	26.9714	27.7037	29.2358	28.4844	27.3745	27.9604	28.5578	28.9129	28.164	28.0702	29.1346	29.1532	28.3141	29.243	27.2456	26.6457	28.6465	28.3386	27.6417	27.2569	27.1964	27.2899
	0.629333	-0.171785	P41250	P41250	Glycine--tRNA ligase	GARS	Color2 [DarkGray]	1	4					12	12	12	30.4	30.4	30.4	83.165	0	323.31	2097000000	327	25.7673	25.4567	25.5117	25.3965	25.5984	25.9135	24.9226	25.7435	26.0061	25.7018	25.4223	25.401	26.0663	25.6707	25.0375	26.3458	26.0619	25.6048	25.3016	25.4892	25.7262	25.792	25.9265	25.2657	25.7035
	0.627813	-0.29742	P25098;P35626	P25098	Beta-adrenergic receptor kinase 1	ADRBK1	Color2 [DarkGray]	1	4					12	12	12	24.5	24.5	24.5	79.573	0	98.381	788660000	142	23.6446	23.6788	24.4804	23.8115	25.0768	23.7619	23.172	24.619	23.1206	24.2589	22.4514	24.5177	24.2713	21.9327	24.088	24.4781	23.471	25.0847	24.3527	24.3852	24.0434	25.0693	23.5507	24.2687	23.9328
	0.627524	-0.304682	Q99598	Q99598	Translin-associated protein X	TSNAX	Color2 [DarkGray]	1	4					5	5	5	29	29	29	33.112	0	267.09	1322400000	107	24.9693	24.3087	24.6604	25.0601	24.2847	24.9716	23.6162	24.0065	23.7619	24.9868	23.1772	25.6705	23.7882	NaN	24.3406	25.3636	24.2676	23.2418	25.2308	24.5958	24.2645	25.58	24.6512	24.9837	24.8801
	0.626618	-0.252905	P11908-2;P11908;P21108	P11908-2;P11908	Ribose-phosphate pyrophosphokinase 2	PRPS2	Color2 [DarkGray]	1	4					8	8	3	36.8	36.8	14	35.054	0	323.31	5665200000	226	27.106	27.1266	26.8693	25.5203	26.8682	25.7279	25.6106	26.6024	25.3551	27.1573	25.4477	26.9043	26.2921	25.8047	27.243	26.2277	26.8886	27.0217	27.0339	27.0972	26.5792	27.1739	26.5776	27.1672	26.6185
	0.625318	-0.257554	B0I1T2;B0I1T2-4;B0I1T2-3;B0I1T2-2	B0I1T2;B0I1T2-4	Unconventional myosin-Ig;Minor histocompatibility antigen HA-2	MYO1G	Color2 [DarkGray]	1	4					25	25	24	40.6	40.6	39.7	116.44	0	323.31	9055200000	420	26.8934	27.8391	28.6409	28.3181	28.3997	27.2197	25.482	27.6256	27.6034	27.9174	26.9935	27.6194	26.9576	27.3789	27.9928	27.2442	27.9651	27.5232	28.6164	27.9243	27.2833	27.8989	27.9958	27.7102	27.913
	0.625255	-0.607793	P55083-2;P55083	P55083-2;P55083	Microfibril-associated glycoprotein 4	MFAP4	Color2 [DarkGray]	1	4					5	5	5	36.6	36.6	36.6	31.153	0	37.105	1255100000	108	22.7144	21.3826	24.7278	21.7307	NaN	24.846	21.8426	NaN	26.1042	24.1239	23.7899	22.5155	22.7552	22.9931	22.7473	25.0918	26.2289	22.6752	22.9986	NaN	25.3162	24.2326	NaN	NaN	23.234
	0.624732	0.418026	Q08380	Q08380	Galectin-3-binding protein	LGALS3BP	Color2 [DarkGray]	1	4					8	8	8	23.2	23.2	23.2	65.33	0	100.18	2757900000	166	26.2276	23.8529	24.307	25.629	25.288	26.3618	25.7011	25.5395	26.6492	25.3842	26.0344	25.3239	26.1233	26.4564	24.5679	27.6072	28.0839	25.5548	24.8453	24.442	25.9736	25.105	25.6574	24.0408	25.3335
	0.624206	0.230399	Q13232	Q13232	Nucleoside diphosphate kinase 3	NME3	Color2 [DarkGray]	1	4					5	5	5	41.4	41.4	41.4	19.015	0	323.31	1112200000	54	25.3923	24.9911	24.6585	25.2266	25.6973	23.9842	25.4229	24.7028	24.407	24.4795	24.7741	24.7977	24.6824	24.6419	24.0787	24.9631	23.5797	25.4093	25.0379	23.859	25.1494	25.3433	24.7028	25.2299	24.4648
	0.623578	0.607488	Q14315-2;Q14315	Q14315-2;Q14315	Filamin-C	FLNC	Color2 [DarkGray]	1	4					26	19	19	15.2	12	12	287.28	0	140.87	1002800000	92	24.4039	23.6241	27.8113	NaN	23.9535	24.5363	NaN	23.0637	25.9246	NaN	24.3384	23.2667	NaN	25.3343	24.4506	24.0032	26.4065	23.7774	NaN	22.8385	21.7923	NaN	24.8174	24.0342	24.2078
	0.623292	0.349844	P02649;CON__Q03247	P02649	Apolipoprotein E	APOE	Color2 [DarkGray]	1	4					4	4	4	20.5	20.5	20.5	36.154	0	323.31	1486200000	102	25.5673	23.9587	23.3978	25.4167	23.3892	24.3926	25.4693	25.8822	26.3064	24.8582	26.1717	26.6668	25.4676	25.0031	24.4385	24.4575	23.8845	25.2464	25.1747	24.6159	24.4518	23.8821	25.8666	24.0025	23.9945
	0.623016	-0.431256	Q8WXX5	Q8WXX5	DnaJ homolog subfamily C member 9	DNAJC9	Color2 [DarkGray]	1	4					7	7	7	36.2	36.2	36.2	29.909	0	76.859	344930000	45	21.1702	NaN	23.6383	23.2883	22.9345	19.2126	NaN	23.1912	23.0702	22.6061	23.4432	24.0921	23.0354	22.3015	23.9077	NaN	22.0873	NaN	23.5249	23.7153	22.5447	23.5007	23.1672	23.3281	22.8931
	0.622107	-0.363717	Q7L5D6-2;Q7L5D6	Q7L5D6-2;Q7L5D6	Golgi to ER traffic protein 4 homolog	GET4	Color2 [DarkGray]	1	4					3	3	3	16.4	16.4	16.4	30.522	0	142.83	380440000	61	22.2266	23.2188	22.3872	22.8882	22.9372	22.7798	23.0284	22.6768	NaN	22.481	22.0426	21.5534	22.5475	NaN	NaN	25.341	24.7848	23.154	22.2693	23.1833	22.6534	22.4	22.5887	23.1692	22.825
	0.621554	0.243763	Q9UIB8-6;Q9UIB8-5;Q9UIB8-4;Q9UIB8-3;Q9UIB8-2;Q9UIB8	Q9UIB8-6;Q9UIB8-5;Q9UIB8-4;Q9UIB8-3;Q9UIB8-2;Q9UIB8	SLAM family member 5	CD84	Color2 [DarkGray]	1	4					3	3	3	18.7	18.7	18.7	26.902	0	6.8583	272560000	44	23.829	22.7126	NaN	23.0632	23.0438	23.3298	23.499	24.1797	24.2867	23.3281	23.5838	22.7055	NaN	NaN	NaN	NaN	NaN	NaN	23.8708	23.3557	22.1546	22.6334	23.0856	23.9384	23.3095
	0.620916	-0.279013	Q9UBE0;Q9UBE0-2;Q9UBE0-3	Q9UBE0	SUMO-activating enzyme subunit 1;SUMO-activating enzyme subunit 1, N-terminally processed	SAE1	Color2 [DarkGray]	1	4					7	7	7	35.5	35.5	35.5	38.449	0	323.31	2899400000	175	25.587	25.7386	26.3626	26.4475	25.1001	26.4578	25.3917	26.073	25.4852	26.2353	25.6817	26.8912	26.0482	23.1154	25.0771	25.8324	25.424	26.0905	25.6374	26.141	25.1372	26.4784	25.4116	26.4366	26.0472
	0.619619	0.39132	P04080	P04080	Cystatin-B	CSTB	Color2 [DarkGray]	1	4					4	4	4	56.1	56.1	56.1	11.139	0	323.31	16365000000	161	30.788	28.4485	28.3751	27.8852	27.9735	29.9582	28.3643	29.8445	29.2924	28.2393	28.3003	27.4509	27.9213	27.8601	27.4647	27.7542	26.7778	29.1234	28.5064	28.3158	27.4551	28.3291	29.0651	28.7398	27.8573
	0.617841	-0.368099	Q8NFH3;Q8NFH3-2	Q8NFH3;Q8NFH3-2	Nucleoporin Nup43	NUP43	Color2 [DarkGray]	1	4					6	6	6	26.1	26.1	26.1	42.15	0	8.5783	261970000	41	22.8814	24.0665	23.1515	19.6672	21.5989	22.2014	22.981	22.2893	22.9389	23.0002	23.0063	22.9698	22.783	20.8944	22.4539	23.9042	NaN	22.9739	22.7828	22.566	22.4834	23.5589	NaN	23.5277	23.1464
	0.616747	0.378825	O94888	O94888	UBX domain-containing protein 7	UBXN7	Color2 [DarkGray]	1	4					4	4	4	11.2	11.2	11.2	54.862	0	10.314	213990000	58	23.5709	22.4015	24.0636	NaN	22.3518	22.8246	23.0768	NaN	20.6405	22.669	23.2475	22.8197	22.0852	NaN	22.1596	21.7099	22.0726	NaN	NaN	21.6042	22.4641	22.6663	22.1746	22.2177	22.3267
	0.615439	-0.41808	Q9UNP9-2;Q9UNP9;Q9UNP9-3	Q9UNP9-2;Q9UNP9;Q9UNP9-3	Peptidyl-prolyl cis-trans isomerase E	PPIE	Color2 [DarkGray]	1	4					2	2	2	13.5	13.5	13.5	33.085	0	38.05	748930000	24	NaN	23.6288	25.8135	23.8892	NaN	24.6588	21.7251	24.3923	24.0168	24.1326	23.8278	24.0937	24.2459	23.9044	NaN	25.3038	26.3203	24.4271	NaN	22.0163	24.5287	NaN	24.3844	24.8839	NaN
	0.615039	1.19569	P24158	P24158	Myeloblastin	PRTN3	Color2 [DarkGray]	1	4					7	7	7	43.8	43.8	43.8	27.807	0	84.588	7945600000	109	24.7184	24.7447	23.2144	26.6607	26.3726	24.9242	27.7959	NaN	30.616	25.549	28.0701	28.6497	22.2926	26.0243	25.4427	23.1512	26.8231	25.3473	19.9211	NaN	24.4531	21.327	25.4207	NaN	27.0425
	0.613095	0.257482	Q15287-3;Q15287-2;Q15287	Q15287-3;Q15287-2;Q15287	RNA-binding protein with serine-rich domain 1	RNPS1	Color2 [DarkGray]	1	4					4	4	4	23.5	23.5	23.5	30.354	0	19.365	270650000	58	NaN	22.8954	23.0153	23.5063	NaN	22.8956	NaN	23.1925	NaN	23.093	NaN	22.7437	22.8958	22.9724	23.8563	NaN	22.1803	22.4043	22.6855	23.6091	22.4841	NaN	23.3355	23.57	23.0873
	0.61308	0.176894	P11766	P11766	Alcohol dehydrogenase class-3	ADH5	Color2 [DarkGray]	1	4					7	7	7	34.8	34.8	34.8	39.724	0	73.092	1260700000	118	25.3014	25.0448	25.1674	24.8852	24.7338	24.9942	24.4753	25.1384	24.7997	25.2501	24.7424	25.029	24.5785	25.4716	26.1954	24.2215	24.6787	NaN	25.1578	25.244	25.0823	25.2612	25.0034	24.7885	24.8738
	0.612957	0.250094	P35249;P35249-2	P35249;P35249-2	Replication factor C subunit 4	RFC4	Color2 [DarkGray]	1	4					5	5	5	19.6	19.6	19.6	39.681	0.00027755	5.3504	132360000	27	NaN	NaN	22.9711	21.4364	22.576	22.2109	NaN	NaN	NaN	22.2917	22.12	22.6638	21.766	NaN	22.1432	NaN	NaN	21.7642	21.7763	21.9209	21.7657	21.6847	21.7248	NaN	21.8579
	0.612604	0.2123	P30101	P30101	Protein disulfide-isomerase A3	PDIA3	Color2 [DarkGray]	1	4					13	13	13	29.5	29.5	29.5	56.782	0	323.31	23656000000	792	28.8472	28.3643	28.471	28.3219	28.0115	29.3899	29.1355	29.6843	29.6821	28.5538	29.2038	28.8554	29.4243	30.0359	29.1015	29.1767	28.542	28.5076	28.1291	29.3263	28.6734	28.4454	28.5555	28.0175	28.6722
	0.611175	-0.436078	P35573;P35573-2;P35573-3	P35573;P35573-2;P35573-3	Glycogen debranching enzyme;4-alpha-glucanotransferase;Amylo-alpha-1,6-glucosidase	AGL	Color2 [DarkGray]	1	4					17	17	17	16	16	16	174.76	0	70.413	537760000	108	23.1195	23.2901	24.5843	23.4963	21.8559	22.484	NaN	21.6802	23.8214	24.5231	22.4529	23.7373	22.5171	NaN	24.9494	23.5939	23.3991	NaN	24.2022	24.9369	21.8271	23.3144	23.599	22.6405	24.621
	0.610964	0.3406	P56134-4;P56134-2;P56134-3;P56134	P56134-4;P56134-2;P56134-3;P56134	ATP synthase subunit f, mitochondrial	ATP5J2	Color2 [DarkGray]	1	4					3	3	3	63.3	63.3	63.3	5.7407	0	31.618	749510000	84	23.0622	23.379	25.2302	NaN	NaN	24.5706	24.5162	24.0393	23.1396	23.944	24.3878	23.9935	24.1988	24.0627	25.0416	24.0476	24.5653	23.743	23.0585	25.1122	24.6442	24.3155	22.6171	23.677	23.265
	0.610906	0.11981	Q16555;Q16555-2	Q16555;Q16555-2	Dihydropyrimidinase-related protein 2	DPYSL2	Color2 [DarkGray]	1	4					21	21	18	60.5	60.5	51.9	62.293	0	323.31	23193000000	835	28.8001	28.4511	28.5383	29.1082	28.5673	29.3229	29.1579	28.8461	28.9382	28.9529	29.315	28.979	29.0159	29.3742	29.1143	28.5328	28.8078	29.2933	28.4453	28.7604	29.1353	28.6877	28.614	28.3792	28.8444
	0.610804	-0.280953	P18085	P18085	ADP-ribosylation factor 4	ARF4	Color2 [DarkGray]	1	4					10	6	6	70.6	41.7	41.7	20.511	0	321.98	842270000	153	22.9252	22.4342	23.9266	24.0404	23.8334	24.1913	24.2033	23.9516	25.2512	24.0032	24.5893	24.3627	24.0807	24.6898	23.711	24.5587	23.6805	23.7569	NaN	23.9265	24.8322	24.826	23.9792	23.3972	23.694
	0.609328	0.379154	Q12882;Q12882-2	Q12882	Dihydropyrimidine dehydrogenase [NADP(+)]	DPYD	Color2 [DarkGray]	1	4					14	14	14	18.1	18.1	18.1	111.4	0	33.771	645700000	116	23.9697	23.4707	22.3017	24.6407	24.3038	25.8262	24.6742	25.139	23.1026	23.1397	23.5608	25.1523	24.2219	21.8758	22.5178	24.4546	23.7779	24.7865	23.4669	23.957	22.6409	23.0688	24.2	NaN	23.268
	0.60796	0.251527	Q9UKK9	Q9UKK9	ADP-sugar pyrophosphatase	NUDT5	Color2 [DarkGray]	1	4					7	7	7	42.9	42.9	42.9	24.327	0	323.31	2803400000	165	27.0475	26.2751	25.9016	26.5601	25.9512	25.8712	26.1574	26.3678	25.1548	26.5439	25.9094	26.1658	25.8411	26.0292	25.8197	25.6327	24.9256	26.5084	26.116	23.7308	25.5779	26.0946	26.8284	26.4981	24.7873
	0.607918	0.218641	P58546	P58546	Myotrophin	MTPN	Color2 [DarkGray]	1	4					3	3	3	40.7	40.7	40.7	12.895	0	323.31	4940900000	209	26.9292	26.2245	25.3509	25.7331	26.1358	25.6875	26.2842	26.7025	25.7056	26.215	25.7766	26.343	26.8371	26.0692	26.6576	26.1178	26.2172	26.9857	26.7867	25.7168	25.983	26.0985	26.3165	26.3723	26.014
	0.606788	0.23007	O15144	O15144	Actin-related protein 2/3 complex subunit 2	ARPC2	Color2 [DarkGray]	1	4					9	9	9	36	36	36	34.333	0	323.31	34790000000	292	30.6542	29.5242	30.2636	29.7119	29.3046	29.3845	29.4711	30.3254	29.4932	29.915	29.1138	29.6364	29.9602	28.8103	30.3543	28.8891	28.075	29.7498	30.2817	29.9373	29.0518	30.0259	30.2562	29.5834	29.4092
	0.606446	0.388405	P08571	P08571	Monocyte differentiation antigen CD14;Monocyte differentiation antigen CD14, urinary form;Monocyte differentiation antigen CD14, membrane-bound form	CD14	Color2 [DarkGray]	1	4					9	9	9	29.9	29.9	29.9	40.076	0	323.31	7442300000	234	27.4615	26.3257	26.3625	27.2398	26.8131	28.9273	27.7041	28.3805	28.4878	25.9966	27.2865	26.3322	28.7637	27.7243	24.8456	27.5009	27.8875	28.7012	25.9005	26.9562	27.5242	26.3256	26.702	26.5842	26.1823
	0.605348	-0.293432	Q96B97-2;Q96B97;Q96B97-3	Q96B97-2;Q96B97	SH3 domain-containing kinase-binding protein 1	SH3KBP1	Color2 [DarkGray]	1	4					13	13	13	25.6	25.6	25.6	68.549	0	323.31	2888800000	217	26.2254	26.5355	26.0543	26.0011	26.3969	24.0378	25.5002	26.1973	24.6952	26.5294	25.5682	26.796	24.8503	24.8866	26.2771	25.2206	24.5923	26.5774	26.9134	26.3642	25.3318	26.3743	26.2653	25.8824	26.6626
	0.604469	0.152919	Q9NZL9;Q9NZL9-3;Q9NZL9-4;Q9NZL9-2;Q9NZL9-5	Q9NZL9;Q9NZL9-3;Q9NZL9-4;Q9NZL9-2	Methionine adenosyltransferase 2 subunit beta	MAT2B	Color2 [DarkGray]	1	4					6	6	6	28.1	28.1	28.1	37.551	0	291.42	3257300000	161	26.4822	26.1811	26.4531	26.4689	26.2442	26.8352	26.5358	26.7684	25.8513	26.1956	25.8622	26.5464	26.3884	26.3052	25.9311	25.2058	25.1602	26.8516	26.5429	26.1318	26.4372	26.4832	26.4055	26.6922	26.2028
	0.603922	0.141076	P60953;P60953-1	P60953;P60953-1	Cell division control protein 42 homolog	CDC42	Color2 [DarkGray]	1	4					5	5	5	56.5	56.5	56.5	21.258	0	323.31	3449900000	454	26.42	26.6966	26.0854	25.4757	25.7724	25.5774	25.6804	26.3454	25.9368	26.107	25.9261	26.1385	26.0899	25.8236	26.2709	25.8381	26.0394	25.7028	25.647	26.0883	25.8657	25.9634	26.1202	26.0166	26.1769
	0.603882	-0.311061	Q5T440	Q5T440	Putative transferase CAF17, mitochondrial	IBA57	Color2 [DarkGray]	1	4					4	4	4	20.8	20.8	20.8	38.155	0	56.699	216950000	39	22.6725	NaN	23.5892	NaN	21.6885	NaN	NaN	22.3034	22.0648	22.6027	21.9502	21.7142	21.8025	NaN	23.9402	22.8931	21.864	22.7023	NaN	23.4194	22.2509	23.457	22.3299	23.0165	21.7911
	0.603523	0.143147	Q9UL25	Q9UL25	Ras-related protein Rab-21	RAB21	Color2 [DarkGray]	1	4					4	4	4	22.7	22.7	22.7	24.347	0	53.503	705230000	92	23.8165	23.9997	24.5898	24.0358	23.8433	24.2954	24.1143	24.245	24.1351	24.4612	23.7489	24.057	23.8598	24.4262	24.9354	23.6178	23.5324	23.9496	24.2357	23.6334	23.9537	24.1085	24.4628	24.0128	23.3217
	0.601875	-0.255436	Q9NZT2-2;Q9NZT2	Q9NZT2-2;Q9NZT2	Opioid growth factor receptor	OGFR	Color2 [DarkGray]	1	4					4	4	4	10.5	10.5	10.5	71.423	0	49.83	491800000	65	23.7649	23.8388	24.0289	24.181	23.0178	23.9179	23.5598	24.0358	22.2685	24.1707	22.5219	23.3865	22.8381	NaN	22.6498	23.4037	NaN	24.0128	24.2375	23.9319	23.005	24.1172	23.9321	24.0491	23.9258
	0.601234	-0.359486	Q9UDY8-2;Q9UDY8	Q9UDY8-2;Q9UDY8	Mucosa-associated lymphoid tissue lymphoma translocation protein 1	MALT1	Color2 [DarkGray]	1	4					6	6	6	13	13	13	91.08	0	20.498	311510000	61	22.5537	23.7008	23.88	NaN	23.7176	NaN	NaN	21.8336	NaN	23.154	21.6636	22.7646	NaN	NaN	22.7307	NaN	24.5256	23.0509	23.6769	23.0161	NaN	22.3345	23.3806	23.4288	23.912
	0.598411	-0.258728	P42858	P42858	Huntingtin	HTT	Color2 [DarkGray]	1	4					13	13	13	6.1	6.1	6.1	347.6	0	52.968	199250000	84	21.9649	22.7416	23.2339	22.0676	22.4161	21.8236	21.6966	22.2369	21.7764	22.3963	21.7536	22.0861	22.3305	NaN	21.8781	20.7228	21.9082	22.5992	22.8085	23.4843	22.147	22.4356	22.1439	22.3259	23.2325
	0.597922	-0.305137	Q8NDX1-2;Q8NDX1	Q8NDX1-2;Q8NDX1	PH and SEC7 domain-containing protein 4	PSD4	Color2 [DarkGray]	1	4					6	6	6	11.7	11.7	11.7	113.13	0	23.797	364090000	75	22.2102	24.5055	24.0141	23.2312	23.9928	21.4203	NaN	22.8227	22.6615	23.2973	NaN	23.294	22.6716	NaN	22.1857	NaN	23.3054	23.0746	24.2921	23.4844	NaN	23.461	23.2299	23.6204	23.5744
	0.5975	0.17193	Q8NCW5-2;Q8NCW5	Q8NCW5-2;Q8NCW5	NAD(P)H-hydrate epimerase	APOA1BP	Color2 [DarkGray]	1	4					6	6	6	65.4	65.4	65.4	20.43	0	67.222	908690000	119	24.5393	25.106	24.097	24.561	24.5305	24.3233	24.3017	24.3404	24.347	24.6849	24.3416	24.6394	24.6249	23.7146	24.3026	24.0186	24.0094	24.6113	24.8257	24.3704	24.3836	24.7108	24.4224	24.3707	24.5546
	0.596857	-0.300055	Q9NZB2-4;Q9NZB2;Q9NZB2-6;Q9NZB2-5;Q9NZB2-2	Q9NZB2-4;Q9NZB2;Q9NZB2-6	Constitutive coactivator of PPAR-gamma-like protein 1	FAM120A	Color2 [DarkGray]	1	4					13	13	13	17.9	17.9	17.9	117.4	0	93.732	1268300000	100	24.2792	24.7834	25.1681	24.8352	24.7478	24.5179	24.0242	24.3548	NaN	24.8087	25.804	24.9168	24.5268	22.0837	25.0538	22.7727	25.0607	25.489	25.0424	26.3177	24.9877	24.5461	24.7599	24.605	24.4244
	0.594297	0.353907	P62857	P62857	40S ribosomal protein S28	RPS28	Color2 [DarkGray]	1	4					2	2	2	33.3	33.3	33.3	7.8409	0	323.31	36061000000	302	30.4387	30.2196	29.3464	30.6828	30.8447	29.036	30.0109	28.9866	29.7104	29.0418	29.6548	28.4694	29.6291	29.8416	27.7386	29.7808	29.5034	29.0973	30.7982	28.4398	29.4314	29.6239	29.698	30.3442	29.3285
	0.59358	0.17581	Q13867	Q13867	Bleomycin hydrolase	BLMH	Color2 [DarkGray]	1	4					2	2	2	7.9	7.9	7.9	52.562	0.00026103	4.0802	295590000	37	23.6147	22.7484	23.4684	22.9465	23.029	23.4385	NaN	23.29	NaN	23.5791	22.8971	23.296	23.3475	23.5335	23.9799	22.0131	NaN	23.2435	NaN	23.1157	22.6796	23.0889	23.815	23.5898	22.9432
	0.593281	0.197207	Q9Y303;Q9Y303-2;Q9Y303-3	Q9Y303;Q9Y303-2;Q9Y303-3	Putative N-acetylglucosamine-6-phosphate deacetylase	AMDHD2	Color2 [DarkGray]	1	4					4	4	4	13.9	13.9	13.9	43.747	0	183.57	672380000	89	24.1153	24.587	24.3527	24.1822	24.1685	23.9498	24.0617	24.2075	23.7877	24.2125	23.9467	23.4609	24.4611	23.6337	23.7446	23.4981	23.6235	24.3896	24.4284	23.7661	23.5126	24.3884	23.8519	23.9904	24.2983
	0.592375	-0.249661	O95861;O95861-2;O95861-3;O95861-4	O95861;O95861-2;O95861-3;O95861-4	3(2),5-bisphosphate nucleotidase 1	BPNT1	Color2 [DarkGray]	1	4					5	5	5	32.8	32.8	32.8	33.392	0	123.84	456140000	85	23.0732	23.6511	24.2079	23.5398	23.4521	23.0161	23.3164	23.729	22.87	23.9211	21.5388	23.8646	23.3543	NaN	23.715	NaN	21.9142	23.2078	24.3461	23.7997	23.6779	23.6678	23.9587	23.8187	24.1131
	0.590777	0.198544	O15145	O15145	Actin-related protein 2/3 complex subunit 3	ARPC3	Color2 [DarkGray]	1	4					3	3	3	15.2	15.2	15.2	20.546	0	154.16	5735800000	219	27.2852	26.955	27.4774	27.2772	26.7124	26.5674	26.4813	26.7372	26.117	26.727	26.3746	26.8837	27.0012	25.447	26.6409	25.3312	26.1115	27.0729	27.5432	26.7882	26.4546	26.6994	26.8099	27.2856	26.5926
	0.59035	0.10135	P30044-2;P30044;P30044-3;P30044-4	P30044-2;P30044;P30044-3;P30044-4	Peroxiredoxin-5, mitochondrial	PRDX5	Color2 [DarkGray]	1	4					9	9	9	73.5	73.5	73.5	17.031	0	323.31	20326000000	579	28.7341	28.8902	28.9039	28.9638	28.5282	29.0353	28.7832	28.5715	29.114	28.648	28.8521	28.5102	28.9702	28.5304	28.5542	28.2335	28.3922	29.143	28.8655	28.0566	28.8921	28.9325	28.6748	28.915	28.4589
	0.588875	0.820281	P00488	P00488	Coagulation factor XIII A chain	F13A1	Color2 [DarkGray]	1	4					25	25	25	51.8	51.8	51.8	83.266	0	323.31	15145000000	611	27.3571	26.9122	26.4356	27.7698	26.737	27.6392	30.1473	21.6903	30.005	27.6825	29.165	27.8165	27.4946	30.7786	26.6306	29.0852	28.6883	26.1705	25.5137	25.7269	28.5673	26.9869	NaN	24.804	26.8235
	0.588616	0.172547	Q10567-2;Q10567;Q10567-3;Q10567-4	Q10567-2;Q10567;Q10567-3;Q10567-4	AP-1 complex subunit beta-1	AP1B1	Color2 [DarkGray]	1	4					23	23	15	39.8	39.8	30.6	103.92	0	323.31	4319500000	295	26.6862	26.0325	26.9652	26.0408	25.9855	27.1965	27.0822	26.8143	27.0001	26.7979	26.7257	26.4701	26.3097	27.5178	27.1137	26.64	26.1264	26.4147	26.0727	27.3438	25.5575	26.4216	26.1517	26.2592	26.6857
	0.588423	-0.161741	P39748;P39748-2	P39748;P39748-2	Flap endonuclease 1	FEN1	Color2 [DarkGray]	1	4					4	4	4	16.8	16.8	16.8	42.592	0	172.84	1240100000	92	24.5129	24.3617	25.0288	25.4815	25.236	24.9592	24.415	24.7284	NaN	25.2599	24.4651	25.1684	24.7881	24.1565	25.2745	24.323	NaN	24.4871	25.4349	25.3642	25.0179	25.4036	25.267	25.2466	25.1427
	0.587381	0.325684	P23284	P23284	Peptidyl-prolyl cis-trans isomerase B	PPIB	Color2 [DarkGray]	1	4					8	8	8	31.9	31.9	31.9	23.742	0	84.157	7921100000	197	27.2461	26.52	26.6994	27.5592	26.0461	27.3436	28.0775	27.7697	28.1592	27.3167	27.6727	27.0154	27.6121	29.3946	27.5652	26.3758	27.6744	26.7867	26.4956	27.1303	28.1007	26.9751	26.7913	26.7008	27.1956
	0.587337	-0.616693	P42167;P42167-2	P42167;P42167-2	Lamina-associated polypeptide 2, isoforms beta/gamma;Thymopoietin;Thymopentin	TMPO	Color2 [DarkGray]	1	4					11	4	4	40.5	16.5	16.5	50.67	0	63.557	944170000	81	20.4591	22.262	25.4258	22.8877	NaN	24.0291	24.0165	24.0872	20.8876	25.3942	23.6782	25.6679	24.2043	24.0851	26.3349	22.6792	NaN	NaN	NaN	25.6834	23.658	24.1929	23.6313	23.264	23.9465
	0.584073	-0.147477	Q9Y3U8	Q9Y3U8	60S ribosomal protein L36	RPL36	Color2 [DarkGray]	1	4					4	4	4	29.5	29.5	29.5	12.254	0	314.06	2916300000	94	26.7872	25.4514	26.0241	26.1397	26.32	25.0398	25.4973	25.7336	25.3698	25.4735	24.7887	25.5556	25.9391	25.6771	26.1717	25.2343	26.0074	25.9075	26.1829	25.8831	25.5981	25.684	25.9212	25.9165	25.6971
	0.584068	0.179321	P21281;P15313	P21281	V-type proton ATPase subunit B, brain isoform	ATP6V1B2	Color2 [DarkGray]	1	4					16	16	16	49.3	49.3	49.3	56.5	0	323.31	9513600000	666	28.4464	27.4313	27.2286	27.1764	27.514	28.2914	27.7773	28.6489	28.0145	27.4536	27.634	27.6705	28.2016	27.5424	26.9307	27.5075	26.5011	28.3282	27.1207	28.3186	27.3184	27.56	27.8617	27.9079	27.2829
	0.583887	-0.154776	O14976-2;O14976	O14976-2;O14976	Cyclin-G-associated kinase	GAK	Color2 [DarkGray]	1	4					9	9	9	14.5	14.5	14.5	134.46	0	205.81	655060000	100	24.0635	23.3843	24.1361	23.6737	24.8399	23.3896	23.5331	24.03	23.1374	23.7967	23.4636	24.1462	23.7859	23.2504	24.0202	24.2322	24.5535	23.8971	24.2139	23.9425	24.0887	23.2247	24.1476	24.2955	24.1402
	0.583247	-0.195148	Q96DI7;Q96DI7-2	Q96DI7;Q96DI7-2	U5 small nuclear ribonucleoprotein 40 kDa protein	SNRNP40	Color2 [DarkGray]	1	4					6	6	6	30	30	30	39.31	0	79.349	581310000	107	23.3382	22.9819	24.7025	23.9409	23.335	23.8717	23.9521	23.8052	NaN	24.1517	23.5962	23.5637	23.4343	23.144	23.6099	23.6926	22.8898	23.8153	24.165	24.4608	24.3416	23.9462	24.3631	24.3637	23.9725
	0.582906	-0.321655	P61011;P61011-2	P61011;P61011-2	Signal recognition particle 54 kDa protein	SRP54	Color2 [DarkGray]	1	4					6	6	6	19.2	19.2	19.2	55.704	0	13.058	291370000	43	21.5737	22.335	22.6936	NaN	22.9821	22.6801	22.4483	22.5772	NaN	23.7727	22.9798	23.9512	22.6762	21.5361	23.5486	NaN	23.9411	NaN	NaN	23.0544	22.8616	22.4484	22.5262	NaN	NaN
	0.581732	0.357475	P49748-3;P49748-2;P49748	P49748-3;P49748-2;P49748	Very long-chain specific acyl-CoA dehydrogenase, mitochondrial	ACADVL	Color2 [DarkGray]	1	4					15	15	15	37.2	37.2	37.2	72.926	0	323.31	2368700000	229	24.248	24.9608	26.5822	25.2985	25.3705	27.0767	25.6964	25.5356	25.4842	25.3076	25.7678	25.4907	25.4276	26.6512	26.2489	25.598	25.9447	25.4138	24.9765	26.8856	25.5664	25.6857	24.2197	25.5541	24.6665
	0.581546	-0.619909	Q9Y383;Q96HJ9-2;Q9Y383-3;Q9Y383-2	Q9Y383;Q96HJ9-2;Q9Y383-3;Q9Y383-2	Putative RNA-binding protein Luc7-like 2	LUC7L2	Color2 [DarkGray]	1	4					3	3	3	8.9	8.9	8.9	46.513	0	6.616	325260000	25	20.1966	NaN	23.5221	23.8391	24.3251	20.5345	NaN	NaN	20.9888	22.5634	NaN	23.5884	20.7211	21.2037	23.8905	NaN	25.7307	22.5741	22.1612	20.9095	23.4209	23.4418	22.7792	22.7475	23.4476
	0.581524	0.214335	Q15084-3;Q15084;Q15084-4;Q15084-5;Q15084-2	Q15084-3;Q15084;Q15084-4;Q15084-5;Q15084-2	Protein disulfide-isomerase A6	PDIA6	Color2 [DarkGray]	1	4					15	15	15	46.5	46.5	46.5	47.837	0	323.31	23566000000	521	28.5057	28.4261	28.7082	29.2771	29.1762	29.5438	30.032	29.0054	29.144	29.0184	29.3759	28.8795	29.0561	29.9348	28.3664	29.6292	30.0107	29.0947	28.3127	29.0108	29.2435	28.6141	28.6724	28.4866	28.6342
	0.580568	-0.261307	Q07020-2;Q07020	Q07020-2;Q07020	60S ribosomal protein L18	RPL18	Color2 [DarkGray]	1	4					2	2	2	16.4	16.4	16.4	18.091	0	323.31	7002700000	115	27.0288	25.9192	27.9238	27.9246	27.8898	27.3172	NaN	25.1598	26.4923	27.6954	26.9298	27.4333	27.5473	27.5696	27.634	26.7893	27.3471	26.9854	28.0731	27.9763	27.11	27.8545	27.4584	27.847	28.2841
	0.579592	0.193457	O00764;O00764-3;O00764-2	O00764;O00764-3;O00764-2	Pyridoxal kinase	PDXK	Color2 [DarkGray]	1	4					9	9	9	51.6	51.6	51.6	35.102	0	323.31	3507500000	258	26.7894	26.627	25.8084	25.75	26.1614	26.8178	26.7281	26.4377	26.5482	25.6056	26.6849	26.2487	26.1411	26.5593	25.694	26.6581	26.9535	26.139	25.9877	25.4807	27.304	26.0535	25.6938	25.7835	25.9727
	0.57838	0.144428	P25705;P25705-2;P25705-3	P25705;P25705-2;P25705-3	ATP synthase subunit alpha, mitochondrial	ATP5A1	Color2 [DarkGray]	1	4					19	19	19	44.7	44.7	44.7	59.75	0	323.31	48667000000	1181	29.3465	29.8583	30.3624	29.5678	30.1875	30.2993	30.2527	30.1986	29.8465	29.6233	30.1763	29.6611	30.5111	30.3265	30.2075	29.7258	30.2503	30.2675	29.5688	30.4204	29.7541	30.2483	29.4509	29.8498	29.774
	0.577957	-0.213066	Q63HN8;Q63HN8-4;Q63HN8-5;Q63HN8-6	Q63HN8;Q63HN8-4	E3 ubiquitin-protein ligase RNF213	RNF213	Color2 [DarkGray]	1	4					100	100	100	28.4	28.4	28.4	591.4	0	323.31	9346300000	1283	27.2611	27.3733	27.8836	27.3933	27.8816	27.6958	27.9519	27.9845	26.5895	28.2049	27.2498	28.3031	27.9464	26.1558	27.721	27.5107	26.5387	28.1721	26.8389	28.8805	27.2122	27.9967	28.2451	27.7091	28.0224
	0.577373	-0.319294	Q92619;Q92619-2	Q92619;Q92619-2	Minor histocompatibility protein HA-1;Minor histocompatibility antigen HA-1	HMHA1	Color2 [DarkGray]	1	4					12	12	12	18.4	18.4	18.4	124.61	0	323.31	6396300000	199	27.0202	28.2157	27.3832	26.8844	27.0036	25.9223	25.8475	26.6139	25.9094	27.2156	26.2472	26.8347	27.7679	24.7744	27.0738	26.9885	28.3292	26.8547	27.4798	27.0703	24.6267	27.1547	26.6962	27.2377	27.7296
	0.57732	0.389171	P07686	P07686	Beta-hexosaminidase subunit beta;Beta-hexosaminidase subunit beta chain B;Beta-hexosaminidase subunit beta chain A	HEXB	Color2 [DarkGray]	1	4					9	9	9	27.2	27.2	27.2	63.111	0	30.932	793950000	123	26.151	22.8751	22.8739	24.9359	NaN	25.1982	24.9061	24.1341	26.2135	24.1508	24.6741	24.0452	24.2819	24.7322	22.4022	24.4397	23.3416	NaN	21.5966	23.8486	24.754	23.3643	24.7837	23.8531	24.0176
	0.577103	-0.27638	P15498-2;P15498;Q9UKW4-2;Q9UKW4;Q9UKW4-4	P15498-2;P15498	Proto-oncogene vav	VAV1	Color2 [DarkGray]	1	4					13	13	13	21	21	21	94.492	0	323.31	1714100000	101	24.7366	24.987	26.3689	25.1634	24.6215	25.2737	24.9447	25.82	24.4278	25.4921	25.0395	25.2077	26.615	23.4628	26.8526	25.9577	24.765	25.0458	25.54	26.4123	25.0479	26.0489	25.5565	25.5512	26.1978
	0.575696	-0.234053	P60228	P60228	Eukaryotic translation initiation factor 3 subunit E	EIF3E	Color2 [DarkGray]	1	4					14	14	14	42.5	42.5	42.5	52.22	0	180.16	827300000	181	24.2392	24.7836	24.1482	24.6187	24.9735	23.8816	23.9704	23.7965	23.3047	24.5986	22.8551	24.6107	24.1419	22.6815	24.403	22.9546	23.0672	24.3967	24.8025	24.9759	23.7508	24.2947	24.7139	24.4142	24.5771
	0.575233	-0.257021	P61006;P61006-2;P59190-2;P59190	P61006;P61006-2	Ras-related protein Rab-8A	RAB8A	Color2 [DarkGray]	1	4					5	4	3	32.4	27.1	19.8	23.668	0	97.098	647600000	68	23.5784	24.5607	24.769	24.0135	23.6537	24.4843	24.0185	23.868	23.7465	23.893	24.2426	23.3149	NaN	23.5104	20.8138	24.148	23.8082	24.1022	23.7165	24.4722	23.9915	24.212	23.4506	24.0835	24.2031
	0.57503	-0.619615	P00747	P00747	Plasminogen;Plasmin heavy chain A;Activation peptide;Angiostatin;Plasmin heavy chain A, short form;Plasmin light chain B	PLG	Color2 [DarkGray]	1	4					9	9	9	18.5	18.5	18.5	90.568	0	282.19	946050000	111	NaN	21.6199	NaN	24.0057	23.6676	21.5518	NaN	NaN	24.5598	23.779	23.4711	24.5365	24.0683	24.9703	24.7353	23.6665	24.7826	NaN	22.6425	23.723	25.0776	22.7338	21.7697	NaN	23.5322
	0.573032	-0.325133	Q13724-2;Q13724	Q13724-2;Q13724	Mannosyl-oligosaccharide glucosidase	MOGS	Color2 [DarkGray]	1	4					9	9	9	24.8	24.8	24.8	80.702	0	44.601	1529900000	204	22.5748	24.8341	25.2619	23.9251	24.2112	25.1465	23.7698	23.9601	24.5503	24.6521	25.2039	25.0792	25.0616	25.0627	25.2556	26.398	26.7197	23.5318	24.1497	25.0758	25.6518	24.839	24.0846	23.5045	24.8834
	0.572828	-0.463654	Q8N1K5;Q8N1K5-4;Q8N1K5-3;Q8N1K5-2	Q8N1K5;Q8N1K5-4;Q8N1K5-3;Q8N1K5-2	Protein THEMIS	THEMIS	Color2 [DarkGray]	1	4					2	2	2	3.7	3.7	3.7	73.451	0	247.79	789870000	50	24.1273	23.3222	24.2528	24.0551	25.4105	22.914	23.205	23.9304	NaN	24.3039	23.16	25.4301	NaN	20.4807	23.8733	24.5244	25.3066	22.5846	23.6286	24.3357	25.7292	24.9985	23.526	24.8193	25.2058
	0.572735	0.145102	P49327	P49327	Fatty acid synthase;[Acyl-carrier-protein] S-acetyltransferase;[Acyl-carrier-protein] S-malonyltransferase;3-oxoacyl-[acyl-carrier-protein] synthase;3-oxoacyl-[acyl-carrier-protein] reductase;3-hydroxyacyl-[acyl-carrier-protein] dehydratase;Enoyl-[acyl-carrier-protein] reductase;Oleoyl-[acyl-carrier-protein] hydrolase	FASN	Color2 [DarkGray]	1	4					42	42	42	27.7	27.7	27.7	273.42	0	323.31	8627100000	740	27.045	27.6417	27.3597	27.8397	28.0237	27.738	27.7102	27.4389	27.0091	27.5686	27.3449	27.8033	28.1823	27.5458	28.2908	27.1729	27.9016	27.6158	27.1782	27.6034	27.6614	27.3614	27.8429	27.3534	27.3404
	0.572422	-0.232279	Q96K17;Q96K17-2	Q96K17;Q96K17-2	Transcription factor BTF3 homolog 4	BTF3L4	Color2 [DarkGray]	1	4					3	3	3	29.1	29.1	29.1	17.27	0	84.061	512320000	61	23.5101	21.4705	22.7712	23.375	23.3005	23.6466	23.804	23.8776	23.8728	23.4765	24.0048	23.7042	23.3708	23.5822	NaN	22.9671	23.2461	24.1896	23.469	22.8715	23.7057	23.4697	24.3655	23.7828	23.5088
	0.571986	-0.375696	P33991	P33991	DNA replication licensing factor MCM4	MCM4	Color2 [DarkGray]	1	4					12	12	12	19.6	19.6	19.6	96.557	0	240.66	569280000	135	22.9802	23.0994	23.2603	24.9461	24.0809	23.6769	23.5192	23.2852	20.5842	24.7505	22.9948	24.2694	23.8088	21.0174	22.7898	22.6805	21.2838	23.2388	23.6985	24.6969	23.8773	24.0617	25.2022	23.4319	23.9668
	0.571598	-0.366042	P52735-3;P52735-2;P52735	P52735-3;P52735-2;P52735	Guanine nucleotide exchange factor VAV2	VAV2	Color2 [DarkGray]	1	4					6	6	6	12.4	12.4	12.4	97.031	0	207.17	181650000	43	NaN	21.1782	23.6527	21.7634	22.8222	NaN	NaN	NaN	21.8281	22.287	NaN	22.8929	NaN	20.6365	22.126	NaN	21.7583	NaN	23.5791	22.5111	23.2466	23.0225	NaN	22.0129	22.3834
	0.570977	0.329313	P22352	P22352	Glutathione peroxidase 3	GPX3	Color2 [DarkGray]	1	4					4	4	4	22.6	22.6	22.6	25.552	0	5.8868	1084900000	106	24.1702	24.0551	24.6206	25.5195	24.5612	25.0124	24.723	24.2034	24.7063	24.3085	24.0682	23.9232	23.4037	24.0185	22.4874	24.7085	23.8206	23.9992	24.2979	22.7981	24.9806	24.4841	23.3127	23.0436	23.2843
	0.57023	-0.150779	P08708	P08708	40S ribosomal protein S17	RPS17	Color2 [DarkGray]	1	4					4	4	4	41.5	41.5	41.5	15.55	0	303.46	6874300000	282	27.2628	27.4543	27.1593	27.4108	27.241	27.1025	26.9922	27.1328	26.9218	27.2188	26.7551	26.754	27.0081	26.2384	26.1444	27.3531	27.8855	27.101	27.3212	26.8407	26.8024	27.1976	27.1601	27.8933	26.938
	0.570224	-0.210991	Q8IZ83;Q8IZ83-3;Q8IZ83-2	Q8IZ83;Q8IZ83-3	Aldehyde dehydrogenase family 16 member A1	ALDH16A1	Color2 [DarkGray]	1	4					10	10	10	25.3	25.3	25.3	85.126	0	323.31	3691200000	268	25.8393	26.9203	25.9925	25.3431	27.118	26.1595	26.0737	26.648	25.9554	26.2926	25.6704	26.875	25.5699	24.6338	25.72	26.6861	26.0039	26.8284	26.2413	26.4627	26.871	26.5024	26.495	26.7073	26.4
	0.570203	-0.256999	Q8IWZ3;Q8IWZ3-4;Q8IWZ3-6;Q8IWZ3-5;Q8IWZ3-2;Q8IWZ3-3	Q8IWZ3;Q8IWZ3-4;Q8IWZ3-6;Q8IWZ3-5;Q8IWZ3-2	Ankyrin repeat and KH domain-containing protein 1	ANKHD1	Color2 [DarkGray]	1	4					13	13	9	9.5	9.5	7.2	269.45	0	37.266	640850000	68	23.4456	23.7828	23.2747	24.1922	24.252	23.278	24.03	22.7346	23.8272	24.1631	23.2805	24.1319	24.6481	NaN	NaN	24.2583	23.07	24.7514	24.4755	23.0567	23.6367	23.8577	NaN	24.4485	24.5161
	0.569598	0.385335	P07919;A0A096LP55	P07919;A0A096LP55	Cytochrome b-c1 complex subunit 6, mitochondrial;Cytochrome b-c1 complex subunit 6	UQCRH;UQCRHL	Color2 [DarkGray]	1	4					2	2	2	48.4	48.4	48.4	10.739	0	204.76	2252000000	79	26.5714	26.3998	25.7854	25.4241	25.4667	25.3724	25.6368	26.3377	25.2078	24.8987	25.3964	24.748	24.899	23.6702	23.9151	26.0705	26.9012	25.7152	25.7155	25.0053	25.881	25.8327	25.2304	25.4908	21.7587
	0.569476	-0.414586	P02794	P02794	Ferritin heavy chain;Ferritin heavy chain, N-terminally processed	FTH1	Color2 [DarkGray]	1	4					4	4	4	24.6	24.6	24.6	21.225	0	34.406	3231500000	69	27.5694	26.3127	26.392	25.7859	24.8762	26.6213	27.567	25.8191	23.8338	26.3299	24.0976	26.0895	24.7045	26.4016	23.6865	25.7608	26.1764	27.5774	27.512	25.4266	25.9317	25.2513	26.2092	NaN	25.4047
	0.568005	0.216963	Q6IA69;Q6IA69-2	Q6IA69;Q6IA69-2	Glutamine-dependent NAD(+) synthetase	NADSYN1	Color2 [DarkGray]	1	4					2	2	2	3.4	3.4	3.4	79.284	0	39.862	212400000	30	NaN	22.7289	22.8067	NaN	23.383	NaN	NaN	23.0166	22.666	22.9642	NaN	22.9026	NaN	23.1865	22.8318	NaN	NaN	23.1801	NaN	22.4144	22.9329	22.5868	23.1377	NaN	23.5425
	0.567334	-0.310983	Q01844-2;Q01844-6;Q01844-3;Q01844;Q01844-5	Q01844-2;Q01844-6;Q01844-3;Q01844;Q01844-5	RNA-binding protein EWS	EWSR1	Color2 [DarkGray]	1	4					3	3	3	6.9	6.9	6.9	61.217	0	141.51	442340000	37	22.9144	NaN	23.198	24.4943	NaN	23.2977	NaN	23.4464	21.9127	24.2848	22.7834	24.6244	23.1858	22.9023	24.1253	22.4534	21.807	23.6549	24.082	23.4809	24.2388	23.8569	23.6964	23.6356	23.926
	0.566953	0.268903	P36269-3;P36269;P36269-2	P36269-3;P36269;P36269-2	Gamma-glutamyltransferase 5;Gamma-glutamyltransferase 5 heavy chain;Gamma-glutamyltransferase 5 light chain	GGT5	Color2 [DarkGray]	1	4					12	12	12	35.8	35.8	35.8	62.332	0	323.31	8950600000	397	28.2766	28.2856	25.6055	27.6257	27.7148	28.3608	27.4934	26.9311	27.6519	27.0219	27.5222	27.6616	27.2482	27.6387	26.2996	28.4218	27.7066	28.3179	27.0849	26.7892	28.029	27.0477	26.1687	27.2462	27.6964
	0.566866	-0.414673	P06239-3;P06239;P06239-2	P06239-3;P06239	Tyrosine-protein kinase Lck	LCK	Color2 [DarkGray]	1	4					11	11	11	30.8	30.8	30.8	61.189	0	241.9	1550000000	164	24.5761	25.2856	25.3101	25.1346	25.8227	NaN	24.1202	25.1041	22.3531	25.3819	24.8217	25.8075	24.4969	22.0892	26.0721	24.8048	23.3265	25.2366	25.5919	25.8016	24.9757	26.2319	25.6549	25.0035	25.936
	0.566249	-0.274814	P0C870;P0C869-8;P0C869-7;P0C869-6	P0C870;P0C869-8;P0C869-7;P0C869-6	JmjC domain-containing protein 7	JMJD7	Color2 [DarkGray]	1	4					3	3	3	12	12	12	35.932	0	6.6665	127040000	62	21.9558	21.0855	21.4988	NaN	22.6511	21.9082	NaN	22.1142	NaN	21.8316	21.4761	22.4066	20.9082	20.7056	NaN	21.4666	22.1452	22.5392	23.0628	20.4844	21.9285	22.4374	21.7466	21.9023	22.3419
	0.56565	0.349938	P13473;P13473-2;P13473-3	P13473;P13473-2;P13473-3	Lysosome-associated membrane glycoprotein 2	LAMP2	Color2 [DarkGray]	1	4					3	3	3	7.1	7.1	7.1	44.96	0	75.015	5148000000	192	27.5106	28.1312	25.2255	26.846	27.6075	27.0151	27.1351	27.7524	27.325	26.0036	26.3494	26.824	26.2019	26.6129	24.795	27.8616	27.9985	26.8992	25.8774	25.5056	26.9373	26.5911	26.5487	26.8758	25.9713
	0.565097	-0.149048	Q8NI27	Q8NI27	THO complex subunit 2	THOC2	Color2 [DarkGray]	1	4					5	5	5	2.8	2.8	2.8	182.77	0	12.325	169850000	54	21.6999	22.6409	22.3424	NaN	22.9899	21.8397	21.7436	21.1733	21.5188	21.9471	21.6662	22.432	22.1059	22.231	22.1638	21.9686	21.9052	NaN	22.6002	22.0578	22.5122	22.3472	21.8773	21.7925	22.4556
	0.564743	0.218651	O95295	O95295	SNARE-associated protein Snapin	SNAPIN	Color2 [DarkGray]	1	4					6	6	6	72.1	72.1	72.1	14.874	0	323.31	3919200000	149	27.2347	26.6878	26.7739	27.4802	26.7837	26.2168	26.9472	26.5938	26.1157	26.7075	26.0941	26.1735	26.5525	26.4666	26.03	26.4333	25.5437	27.0684	27.4585	25.5432	26.577	26.7867	26.77	27.045	26.4348
	0.562681	0.192812	P62269	P62269	40S ribosomal protein S18	RPS18	Color2 [DarkGray]	1	4					5	5	5	25.7	25.7	25.7	17.718	0	8.74	5588500000	121	26.7872	26.7213	27.8377	27.3508	27.2793	27.6333	27.0385	27.4257	26.7486	26.8341	26.36	26.2792	27.8419	27.1455	27.4565	25.9601	26.7605	27.3107	27.3535	26.695	26.8002	27.5691	27.0168	28.1849	26.4649
	0.562629	-0.356858	Q96JH7	Q96JH7	Deubiquitinating protein VCIP135	VCPIP1	Color2 [DarkGray]	1	4					7	7	7	10.7	10.7	10.7	134.32	0	10.469	621080000	44	NaN	24.3138	23.0121	23.6119	24.4929	21.1611	23.5589	25.2779	NaN	23.9539	23.1997	24.6261	23.6853	NaN	23.7009	23.7348	NaN	25.4987	25.4548	23.7326	22.7804	24.7582	23.7055	NaN	23.8814
	0.560442	0.133541	Q96GG9	Q96GG9	DCN1-like protein 1	DCUN1D1	Color2 [DarkGray]	1	4					2	2	2	9.3	9.3	9.3	30.124	0	58.108	236220000	49	22.7735	23.0002	22.2994	21.9854	22.5107	22.6637	22.8156	22.8957	22.1063	22.5848	22.4664	22.8696	22.9485	NaN	22.3398	22.6489	21.7705	22.907	22.4958	22.3429	22.6314	22.4775	23.023	22.7955	NaN
	0.560401	-0.206308	O75569-3;O75569-2;O75569	O75569-3;O75569-2;O75569	Interferon-inducible double-stranded RNA-dependent protein kinase activator A	PRKRA	Color2 [DarkGray]	1	4					2	2	2	11.1	11.1	11.1	31.635	0	8.1484	593500000	51	23.5407	24.5492	24.0483	23.1636	NaN	23.8597	NaN	23.5522	23.9545	23.9149	23.9231	23.4048	23.9515	24.0134	24.4266	23.9209	24.3936	22.0307	24.0431	23.8354	24.4385	24.5822	NaN	23.9761	24.1377
	0.560198	0.243129	O00754-2;O00754	O00754-2;O00754	Lysosomal alpha-mannosidase;Lysosomal alpha-mannosidase A peptide;Lysosomal alpha-mannosidase B peptide;Lysosomal alpha-mannosidase C peptide;Lysosomal alpha-mannosidase D peptide;Lysosomal alpha-mannosidase E peptide	MAN2B1	Color2 [DarkGray]	1	4					18	18	18	27.8	27.8	27.8	113.61	0	323.31	8424300000	484	28.5012	28.0246	27.1636	28.6329	28.7289	27.0282	27.8553	27.0145	27.8553	27.2238	27.8127	27.1738	27.4901	27.5015	25.9112	28.1345	27.186	27.6925	27.6752	26.3096	27.9797	27.381	27.4491	27.8719	27.6623
	0.560172	0.259269	P28062-2;P28062	P28062-2;P28062	Proteasome subunit beta type-8	PSMB8	Color2 [DarkGray]	1	4					8	8	8	48.9	48.9	48.9	29.769	0	289.14	4694000000	134	28.2728	27.2904	26.8872	27.4194	27.099	27.0919	NaN	27.8596	26.3832	26.6197	25.8291	26.7192	26.8167	26.1828	27.0898	26.0887	25.2617	28.0345	27.5182	26.3056	25.8727	27.0915	26.68	27.4474	26.8701
	0.559041	0.192995	P62937;P62937-2;Q9Y536;P0DN37;P0DN26;A0A0B4J2A2;A0A075B767;A0A075B759;F5H284	P62937;P62937-2	Peptidyl-prolyl cis-trans isomerase A;Peptidyl-prolyl cis-trans isomerase A, N-terminally processed	PPIA	Color2 [DarkGray]	1	4					13	13	13	71.5	71.5	71.5	18.012	0	323.31	172620000000	1720	32.6943	32.2573	32.0975	32.7193	32.3427	31.3071	32.0303	32.0597	31.3976	31.9779	31.5094	31.6348	31.6	31.8018	32.2622	30.9266	30.6756	32.1711	32.6785	31.1673	31.5058	32.215	32.2679	32.1405	31.8305
	0.558899	0.400032	P24557;P24557-3;P24557-4;P24557-2	P24557;P24557-3;P24557-4;P24557-2	Thromboxane-A synthase	TBXAS1	Color2 [DarkGray]	1	4					8	8	8	20.5	20.5	20.5	60.518	0	132.13	534800000	151	22.4762	21.0947	22.5932	23.0796	22.9041	24.709	24.1933	24.4197	23.5403	21.7605	24.5799	23.6427	24.8172	25.577	22.8915	24.7194	23.3418	23.6914	NaN	23.3041	23.9354	22.5452	22.3548	NaN	22.5083
	0.557524	0.352913	P61604	P61604	10 kDa heat shock protein, mitochondrial	HSPE1	Color2 [DarkGray]	1	4					4	4	4	40.2	40.2	40.2	10.932	0	266.94	9429600000	100	29.8788	27.9133	28.0925	28.3934	25.9413	27.5808	28.496	27.6707	26.0334	27.6394	28.0306	27.519	28.0887	27.8198	27.843	26.7833	26.0172	28.3864	28.3388	27.9699	25.9561	26.2254	27.6671	28.4804	27.0457
	0.557345	-0.211532	P31146	P31146	Coronin-1A	CORO1A	Color2 [DarkGray]	1	4					14	14	14	43.6	43.6	43.6	51.026	0	323.31	77544000000	1542	30.7087	30.7406	31.0712	30.5253	30.106	29.4323	29.6819	31.0258	30.016	31.2612	30.2728	30.5932	31.0723	29.8294	31.7133	30.4639	30.1135	30.2774	31.0476	30.8471	30.4971	31.4331	30.633	31.0215	31.0913
	0.556403	0.189125	Q7Z4Q2;Q7Z4Q2-3;Q7Z4Q2-2	Q7Z4Q2;Q7Z4Q2-3;Q7Z4Q2-2	HEAT repeat-containing protein 3	HEATR3	Color2 [DarkGray]	1	4					2	2	2	3.5	3.5	3.5	74.582	0.0019107	2.8196	87959000	31	NaN	NaN	21.82	22.0192	22.1507	21.3207	21.553	21.1115	20.6291	NaN	21.0594	21.4886	21.7078	21.2461	21.1673	21.6841	NaN	21.5075	20.3467	21.7176	NaN	20.8583	21.6416	21.3724	NaN
	0.555984	-0.293113	P55769	P55769	NHP2-like protein 1;NHP2-like protein 1, N-terminally processed	NHP2L1	Color2 [DarkGray]	1	4					2	2	2	31.2	31.2	31.2	14.173	0	53.835	1161800000	82	25.0458	23.4928	25.1448	23.6278	23.625	24.3715	23.9337	25.0398	23.8857	25.0377	24.6974	23.0581	23.7475	24.1772	26.1448	22.5051	24.0618	24.4945	24.192	25.876	25.2097	24.8704	23.9009	25.2165	25.3367
	0.555546	0.211847	Q9UJ70;Q9UJ70-2	Q9UJ70;Q9UJ70-2	N-acetyl-D-glucosamine kinase	NAGK	Color2 [DarkGray]	1	4					15	15	15	63.7	63.7	63.7	37.375	0	323.31	14098000000	503	28.7573	27.8029	28.4811	28.2774	28.4683	28.9825	28.5302	29.6002	27.8163	27.7489	27.8757	27.6074	29.6759	28.2381	28.1746	28.1379	27.6731	29.0762	28.4358	28.5342	28.0623	28.001	28.4047	28.9405	27.9924
	0.555091	0.428739	Q9NP79;Q9NP79-2	Q9NP79;Q9NP79-2	Vacuolar protein sorting-associated protein VTA1 homolog	VTA1	Color2 [DarkGray]	1	4					3	3	3	18.9	18.9	18.9	33.879	0	40.781	891150000	91	24.6502	NaN	24.5943	24.7667	24.9287	24.5058	24.5811	24.616	24.4221	24.413	24.5072	24.6649	24.9444	24.5873	24.756	23.8615	18.061	24.699	24.6574	24.0991	25.2775	24.9252	24.3108	24.8289	24.627
	0.553751	-0.109684	Q8N6H7;Q8N6H7-3;Q8N6H7-2	Q8N6H7;Q8N6H7-3;Q8N6H7-2	ADP-ribosylation factor GTPase-activating protein 2	ARFGAP2	Color2 [DarkGray]	1	4					5	5	5	12.7	12.7	12.7	56.72	0	62.363	331760000	68	NaN	22.5174	23.1982	22.7878	23.2396	22.9663	22.8391	22.6832	22.6958	23.2663	22.5492	23.1427	23.1034	22.5507	23.0191	22.3456	22.9411	22.8309	23.0661	23.2428	23.3644	23.6754	22.9369	22.7315	22.6624
	0.552627	0.289047	Q9Y305-3;Q9Y305-2;Q9Y305;Q9Y305-4	Q9Y305-3;Q9Y305-2;Q9Y305;Q9Y305-4	Acyl-coenzyme A thioesterase 9, mitochondrial	ACOT9	Color2 [DarkGray]	1	4					8	8	8	24.3	24.3	24.3	43.206	0	10.266	271440000	55	NaN	NaN	23.0386	NaN	21.5426	23.9705	23.5093	23.18	22.7402	22.313	23.2016	22.3355	23.8797	23.5742	23.987	NaN	23.259	22.5253	NaN	23.4082	23.3003	23.0257	NaN	22.6227	NaN
	0.552053	0.213018	Q15185-4;Q15185;Q15185-3;Q15185-2	Q15185-4;Q15185;Q15185-3	Prostaglandin E synthase 3	PTGES3	Color2 [DarkGray]	1	4					4	4	4	35.3	35.3	35.3	16.476	0	28.138	1995500000	87	25.9231	25.7478	24.4581	26.279	25.0288	25.8018	25.8387	26.3014	25.3724	25.5641	25.5902	25.4916	25.6431	25.428	25.6148	25.1568	24.7132	26.3015	25.9657	25.4161	26.1694	25.7902	26.613	25.6082	25.1119
	0.551989	-0.231135	P25205;P25205-2	P25205;P25205-2	DNA replication licensing factor MCM3	MCM3	Color2 [DarkGray]	1	4					12	12	12	23.6	23.6	23.6	90.98	0	166.72	1490500000	251	24.8911	25.677	25.158	26.1088	25.6801	24.9668	24.9833	24.9041	22.7682	25.5661	24.5789	25.4823	24.5426	23.9082	25.0602	24.6184	24.3719	25.3499	25.6876	25.1719	24.714	25.5869	26.1469	25.4602	25.0122
	0.551914	0.17658	Q9HCU5	Q9HCU5	Prolactin regulatory element-binding protein	PREB	Color2 [DarkGray]	1	4					2	2	2	10.8	10.8	10.8	45.468	0	75.355	153250000	53	21.9624	NaN	22.6943	NaN	22.2465	22.1416	21.5057	21.7105	22.6811	21.555	22.6926	21.8359	22.2271	22.097	22.0794	21.8827	21.6443	22.1576	NaN	22.2421	23.3204	21.8265	NaN	21.914	21.3961
	0.551135	0.197179	Q6IAA8	Q6IAA8	Ragulator complex protein LAMTOR1	LAMTOR1	Color2 [DarkGray]	1	4					8	8	8	70.8	70.8	70.8	17.745	0	218.35	5287300000	253	27.2624	26.8486	26.8466	27.0639	26.9957	27.1888	27.4626	27.1243	27.4527	25.856	27.1228	26.4967	27.2198	27.2329	25.9737	26.7145	27.5894	27.6725	26.934	26.1491	27.2932	27.0607	26.9972	27.3322	26.5656
	0.550872	-0.198139	O75534-2;O75534;O75534-3;O75534-4	O75534-2;O75534;O75534-3;O75534-4	Cold shock domain-containing protein E1	CSDE1	Color2 [DarkGray]	1	4					3	3	3	5.5	5.5	5.5	85.746	0	323.31	267100000	49	22.1123	22.1219	23.3875	NaN	23.5937	23.1892	NaN	23.0158	NaN	23.1101	21.6065	22.5307	23.0344	22.7193	22.3378	NaN	22.1007	22.404	22.9334	22.9411	23.1324	22.6562	23.0015	22.8924	NaN
	0.550559	-0.199988	Q13576;Q13576-3;Q13576-2	Q13576;Q13576-3;Q13576-2	Ras GTPase-activating-like protein IQGAP2	IQGAP2	Color2 [DarkGray]	1	4					25	24	24	25.5	25	25	180.58	0	323.31	1747300000	328	25.884	25.3211	24.8971	24.3594	25.4292	24.8677	25.2469	25.7028	24.9506	25.1169	24.9662	25.5999	24.8424	25.1136	25.857	25.6841	25.6243	24.9524	24.386	26.1626	26.4578	25.3376	24.9953	24.8403	26.1557
	0.549919	-0.202445	P26358-2;P26358;P26358-3	P26358-2;P26358;P26358-3	DNA (cytosine-5)-methyltransferase 1	DNMT1	Color2 [DarkGray]	1	4					4	4	4	3.3	3.3	3.3	184.82	0	13.154	207120000	86	22.1643	NaN	22.9124	22.8452	22.6274	22.9616	22.1311	22.0989	21.2699	22.5141	22.0668	22.1311	22.7012	21.9393	22.5869	21.9492	NaN	22.9936	22.8006	22.9192	21.9932	22.9649	NaN	23.4881	21.987
	0.549634	0.250117	Q9HB90;Q9NQL2;Q9NQL2-2	Q9HB90;Q9NQL2	Ras-related GTP-binding protein C;Ras-related GTP-binding protein D	RRAGC;RRAGD	Color2 [DarkGray]	1	4					7	7	7	26.6	26.6	26.6	44.223	0	11.259	135340000	55	22.0841	21.8281	22.4804	21.5826	NaN	22.0408	21.5962	22.295	21.9733	22.3265	21.6609	21.8397	22.9443	21.6527	22.1037	NaN	NaN	22.4455	21.4072	21.5121	NaN	21.4332	21.9306	22.3941	21.8896
	0.549153	-0.249987	Q52LJ0;Q52LJ0-1	Q52LJ0;Q52LJ0-1	Protein FAM98B	FAM98B	Color2 [DarkGray]	1	4					9	9	7	34.6	34.6	27.3	45.547	0	270.16	2962300000	114	26.5014	26.144	26.1816	26.5231	25.6779	24.9584	25.8627	26.0745	26.376	26.3328	25.435	26.8103	25.5094	26.3035	24.9939	26.5199	24.571	25.8334	26.3458	26.9343	25.8162	26.0741	26.8998	26.0818	26.1275
	0.548968	-0.181496	P63151;P63151-2;Q66LE6;Q00005-6;Q00005;Q00005-2;Q00005-3;Q00005-4;Q00005-5;Q00005-7	P63151;P63151-2	Serine/threonine-protein phosphatase 2A 55 kDa regulatory subunit B alpha isoform	PPP2R2A	Color2 [DarkGray]	1	4					5	5	5	19.7	19.7	19.7	51.691	0	193.43	824280000	141	23.7321	24.9245	24.7542	24.1136	24.3427	23.8614	22.9379	23.9087	23.654	24.094	23.8275	24.1645	24.2084	23.534	23.8228	24.4702	24.9406	24.0922	25.2671	23.3973	24.147	24.627	23.691	23.9683	24.7096
	0.547708	-0.138913	Q9NYL9	Q9NYL9	Tropomodulin-3	TMOD3	Color2 [DarkGray]	1	4					7	7	7	27.6	27.6	27.6	39.594	0	323.31	1745800000	219	23.819	25.417	24.5893	25.3115	25.6298	25.0968	24.9096	25.0669	25.2987	25.2364	25.0504	25.3254	25.2862	25.8968	24.7236	25.3917	25.688	25.3782	25.3896	24.5569	25.2102	25.7641	24.9665	25.1524	25.4511
	0.547257	0.138183	P60174;P60174-1;P60174-4	P60174;P60174-1;P60174-4	Triosephosphate isomerase	TPI1	Color2 [DarkGray]	1	4					12	12	12	53.5	53.5	53.5	30.791	0	323.31	54961000000	746	30.9521	30.0458	29.9317	30.216	30.4903	30.3935	30.0283	30.6821	30.2129	30.6024	30.1328	30.3632	30.1676	29.9867	30.0152	29.734	29.9743	30.5943	30.4056	29.6276	29.6179	30.7854	30.6885	30.0534	30.153
	0.545584	-0.159879	P43686;P43686-2	P43686;P43686-2	26S protease regulatory subunit 6B	PSMC4	Color2 [DarkGray]	1	4					10	10	10	47.1	47.1	47.1	47.366	0	323.31	2425600000	274	25.4067	26.1515	25.8327	26.1451	26.6188	25.7333	25.165	25.9053	24.983	25.804	25.0663	26.2104	25.8871	25.0975	25.4335	25.2733	25.6079	25.5272	26.1425	26.0325	25.9244	25.6328	26.0712	26.1542	26.1991
	0.54537	0.159778	P18669;Q8N0Y7;P15259	P18669	Phosphoglycerate mutase 1	PGAM1	Color2 [DarkGray]	1	4					14	14	14	68.9	68.9	68.9	28.804	0	323.31	39089000000	667	30.258	29.7618	28.6471	29.8852	30.039	29.442	30.0054	30.0181	29.7387	30.1426	29.9923	30.7759	29.9081	29.4083	29.1763	29.3859	28.8964	29.4282	29.8033	28.9573	29.7159	30.2473	30.1065	30.0321	29.3065
	0.544185	0.204602	O95104;O95104-3;O95104-2	O95104;O95104-3;O95104-2	Splicing factor, arginine/serine-rich 15	SCAF4	Color2 [DarkGray]	1	4					5	5	4	9.5	9.5	8.5	125.87	0	23.785	479860000	59	23.4326	24.2688	23.7201	23.4473	24.6969	NaN	23.7027	23.3218	NaN	23.8465	23.5356	23.7125	23.1609	NaN	23.4391	23.301	22.5025	23.9729	24.0373	23.2792	NaN	23.9066	23.2471	24.2762	23.9656
	0.542835	-0.469511	Q93084-4;Q93084-2;Q93084-3;Q93084-7;Q93084;Q93084-6;Q93084-5	Q93084-4;Q93084-2;Q93084-3;Q93084-7;Q93084;Q93084-6;Q93084-5	Sarcoplasmic/endoplasmic reticulum calcium ATPase 3	ATP2A3	Color2 [DarkGray]	1	4					12	9	8	19.5	14.7	13.2	109.13	0	323.31	1563900000	192	23.7483	25.1615	26.3414	24.8194	25.8435	22.0874	21.5744	22.5773	24.3799	25.1706	24.3181	24.8613	23.566	25.3509	26.2362	24.7678	24.6491	NaN	25.5857	25.687	26.4382	25.5844	22.9457	23.969	26.0521
	0.541985	-0.394329	Q8TEM1;Q8TEM1-2	Q8TEM1;Q8TEM1-2	Nuclear pore membrane glycoprotein 210	NUP210	Color2 [DarkGray]	1	4					11	11	11	9.3	9.3	9.3	205.11	0	177.13	405700000	90	23.5888	NaN	24.7641	23.3753	21.7269	22.3016	22.4465	21.9635	NaN	23.7706	23.4585	23.3978	22.8616	20.7567	23.6446	23.3553	23.334	NaN	23.9596	25.26	21.5424	23.5834	22.6575	NaN	23.943
	0.541599	-0.26221	Q8WXF1;Q8WXF1-2	Q8WXF1;Q8WXF1-2	Paraspeckle component 1	PSPC1	Color2 [DarkGray]	1	4					6	6	6	17.2	17.2	17.2	58.743	0	58.715	1738500000	139	25.1374	25.2577	25.9309	25.9892	24.4226	26.0514	25.5284	24.8095	22.5489	25.8469	23.9384	25.5596	23.8539	24.966	26.1534	24.9017	25.502	25.1526	25.0847	25.6819	24.9862	25.4202	25.6794	25.364	25.3688
	0.541588	-0.105175	Q86VP6;Q86VP6-2;Q86VP6-3	Q86VP6;Q86VP6-2	Cullin-associated NEDD8-dissociated protein 1	CAND1	Color2 [DarkGray]	1	4					27	27	27	35.1	35.1	35.1	136.37	0	323.31	13724000000	818	27.9589	28.6014	28.5179	28.1994	28.4467	27.8473	27.7784	28.1965	27.7464	28.4221	27.9288	28.5304	28.2129	27.8386	28.656	28.1217	27.9284	28.2736	28.5518	28.2394	28.2632	28.512	28.5841	27.9949	28.5388
	0.541391	0.166792	Q92688-2;Q92688	Q92688-2;Q92688	Acidic leucine-rich nuclear phosphoprotein 32 family member B	ANP32B	Color2 [DarkGray]	1	4					5	3	3	42.1	27.2	27.2	22.276	0	48.542	3798200000	173	26.9601	25.851	26.0474	26.4022	26.2851	25.4822	25.9782	26.4808	25.7035	26.9337	26.3208	26.5249	26.1164	25.7603	26.3939	24.919	25.3358	26.3566	25.9918	25.8276	25.5661	25.9787	26.4069	26.3998	25.9952
	0.541322	0.231203	Q07866-8;Q07866-2;Q07866-3;Q07866;Q07866-7;Q07866-5;Q07866-10;Q07866-6;Q07866-4;Q07866-9	Q07866-8;Q07866-2;Q07866-3;Q07866;Q07866-7;Q07866-5;Q07866-10;Q07866-6;Q07866-4;Q07866-9	Kinesin light chain 1	KLC1	Color2 [DarkGray]	1	4					5	5	3	12.2	12.2	6.4	62.825	0	13.983	236570000	28	23.2164	23.6501	NaN	NaN	22.6134	NaN	NaN	NaN	22.4309	NaN	22.4855	22.7268	23.3335	23.0384	22.563	23.2434	24.1834	NaN	22.3872	22.9104	22.5878	NaN	22.9249	21.9394	23.1046
	0.541247	-0.225865	Q9NUV9	Q9NUV9	GTPase IMAP family member 4	GIMAP4	Color2 [DarkGray]	1	4					8	8	8	37.7	37.7	37.7	37.533	0	323.31	5422800000	310	26.1735	27.1612	26.795	26.7568	26.5455	26.1835	27.1311	27.2829	24.9551	27.4562	26.2805	27.3583	27.0245	24.969	26.9038	26.3131	26.214	27.3208	26.9299	27.2385	26.7381	27.2326	27.1907	27.0289	27.1504
	0.540842	0.352742	P62820;P62820-2;P62820-3	P62820;P62820-2	Ras-related protein Rab-1A	RAB1A	Color2 [DarkGray]	1	4					7	2	2	48.8	18.5	18.5	22.677	0	7.7675	135660000	20	NaN	NaN	NaN	22.7365	NaN	21.9952	22.2959	21.9099	21.9371	NaN	21.7737	21.1064	22.4216	24.3473	22.4812	21.1796	21.2346	NaN	NaN	22.4004	NaN	NaN	23.0932	NaN	22.801
	0.540754	0.193189	Q5TFE4;Q5TFE4-2	Q5TFE4	5-nucleotidase domain-containing protein 1	NT5DC1	Color2 [DarkGray]	1	4					5	5	5	21.8	21.8	21.8	51.844	0	26.887	170580000	33	23.0844	NaN	23.5907	22.3885	NaN	NaN	23.3781	22.1004	NaN	22.7738	22.5988	22.1933	22.0199	NaN	23.1048	NaN	NaN	21.8164	22.7378	22.8008	NaN	NaN	22.4613	23.1852	22.1931
	0.540158	-0.398585	Q6WKZ4-3;Q6WKZ4;Q6WKZ4-2;Q6WKZ4-5;Q7L804;Q7L804-2;Q6WKZ4-1	Q6WKZ4-3;Q6WKZ4;Q6WKZ4-2	Rab11 family-interacting protein 1	RAB11FIP1	Color2 [DarkGray]	1	4					4	4	4	10.5	10.5	10.5	70.982	0	253.95	219350000	37	NaN	23.9033	22.2411	21.8826	NaN	21.5055	NaN	NaN	22.1288	20.9358	21.251	21.7981	20.6573	21.5487	21.2444	24.464	23.8209	20.2657	22.3667	22.2292	21.0109	21.9632	NaN	NaN	22.3511
	0.540016	-0.256685	Q9H4A6;Q9H4A5-2	Q9H4A6	Golgi phosphoprotein 3	GOLPH3	Color2 [DarkGray]	1	4					5	5	4	26.2	26.2	21.8	33.81	0	153.49	256010000	56	22.9329	22.3223	22.1133	23.1212	22.8285	23.1328	22.7746	23.0321	22.6388	23.2887	22.8695	22.2604	23.2821	19.7312	NaN	NaN	NaN	23.0773	23.1781	22.6985	24.0213	22.8045	22.7928	22.8723	NaN
	0.539654	0.279037	P05362	P05362	Intercellular adhesion molecule 1	ICAM1	Color2 [DarkGray]	1	4					9	9	9	24.2	24.2	24.2	57.825	0	244.49	3481600000	303	27.6183	25.9295	25.673	26.4495	26.2604	27.7189	27.1128	26.7042	26.8294	25.8387	27.1291	26.1356	25.6048	26.2174	25.4865	25.6977	25.4112	26.7473	26.0147	26.832	26.1737	26.1894	26.2185	26.3627	25.5912
	0.539242	0.172426	Q9UHV9	Q9UHV9	Prefoldin subunit 2	PFDN2	Color2 [DarkGray]	1	4					3	3	3	29.2	29.2	29.2	16.648	0	317.23	2346200000	106	26.8069	25.9959	25.6842	26.3851	26.0913	25.6422	26.1433	26.3515	25.5378	25.9432	25.7318	25.8448	25.7583	25.6076	25.113	25.5519	24.94	26.3717	25.8623	25.3157	25.7789	26.3282	26.4594	26.1403	25.7756
	0.537438	-0.26393	Q99490-2	Q99490-2	Arf-GAP with GTPase, ANK repeat and PH domain-containing protein 2	AGAP2	Color2 [DarkGray]	1	4					5	5	2	9	9	3.7	90.536	0	88.814	276370000	55	22.0963	23.683	23.4291	22.4235	22.8281	21.3234	NaN	NaN	22.1573	22.3907	NaN	22.9356	22.2322	NaN	22.3312	24.5976	22.4312	22.7999	22.4915	23.2379	NaN	22.9408	22.5137	23.1891	22.6797
	0.536854	-0.160446	Q14558;Q14558-2	Q14558;Q14558-2	Phosphoribosyl pyrophosphate synthase-associated protein 1	PRPSAP1	Color2 [DarkGray]	1	4					8	8	8	36.5	36.5	36.5	39.393	0	172.9	620230000	139	22.22	23.8105	24.5572	23.7562	24.1678	23.7452	23.3087	23.7529	23.4031	24.0187	23.6927	24.3919	23.7656	NaN	23.8765	23.4126	23.266	24.4028	24.3233	24.2945	23.8055	24.5114	23.8174	23.9747	24.4296
	0.536828	-0.77416	P04114;CON__ENSEMBL:ENSBTAP00000032840	P04114	Apolipoprotein B-100;Apolipoprotein B-48	APOB	Color2 [DarkGray]	1	4					53	53	53	17.6	17.6	17.6	515.6	0	323.31	2539400000	321	19.319	NaN	25.0082	24.6837	22.2139	23.8433	23.9716	21.4087	27.8112	23.63	25.8879	25.0043	25.1889	27.6504	23.9742	25.8516	26.3109	24.1772	24.384	23.9247	23.4239	22.6513	NaN	NaN	25.3316
	0.535742	-0.144775	O94804	O94804	Serine/threonine-protein kinase 10	STK10	Color2 [DarkGray]	1	4					7	7	7	12.6	12.6	12.6	112.13	0	323.31	1614800000	147	24.5181	24.4809	25.5331	25.5047	25.254	25.0881	25.2678	25.6544	24.4075	25.3589	24.5306	25.0708	25.28	24.2987	25.0448	24.5521	24.1554	25.216	25.4414	25.564	24.8595	25.4967	25.3757	25.3174	25.404
	0.535609	-0.206404	P29350;P29350-3;P29350-4;P29350-2	P29350;P29350-3;P29350-4;P29350-2	Tyrosine-protein phosphatase non-receptor type 6	PTPN6	Color2 [DarkGray]	1	4					18	18	18	47.1	47.1	47.1	67.56	0	323.31	9599400000	534	26.8868	28.3637	28.5075	27.5535	27.8235	27.1979	26.9614	27.8215	26.7235	27.8178	26.7083	26.9969	28.3319	26.6831	28.1705	27.6216	27.9163	27.5771	28.502	27.8555	27.5329	28.0808	27.6074	27.9173	28.1163
	0.53461	0.312588	Q9H6F5	Q9H6F5	Coiled-coil domain-containing protein 86	CCDC86	Color2 [DarkGray]	1	4					2	2	2	6.4	6.4	6.4	40.235	0	26.963	524770000	20	23.9281	25.0711	24.3947	25.1872	25.1338	NaN	NaN	23.652	NaN	24.1246	NaN	23.5774	NaN	NaN	24.1111	24.0521	22.9523	23.8066	25.5504	NaN	23.1536	24.8517	23.6322	24.2375	23.9143
	0.534501	-0.357511	Q86SX6	Q86SX6	Glutaredoxin-related protein 5, mitochondrial	GLRX5	Color2 [DarkGray]	1	4					2	2	2	21	21	21	16.628	0.00050852	3.6553	170640000	21	22.6886	22.0394	22.3982	NaN	NaN	22.3628	23.6186	22.616	21.9335	22.2279	22.4173	22.0373	NaN	19.3034	NaN	22.4076	21.3085	22.9219	23.2605	22.501	NaN	21.2403	22.7567	23.005	NaN
	0.534369	-0.157997	P20618	P20618	Proteasome subunit beta type-1	PSMB1	Color2 [DarkGray]	1	4					9	9	9	46.1	46.1	46.1	26.489	0	323.31	8453700000	390	28.0011	27.5317	27.2881	26.895	27.1549	27.5574	27.1793	28.0824	27.4206	27.4181	26.9038	27.222	27.4417	26.9937	27.4155	27.3668	27.7244	27.9563	27.6338	27.7616	26.8794	27.4923	27.6574	28.3757	27.4816
	0.534052	0.212755	O43678;O43678-2	O43678;O43678-2	NADH dehydrogenase [ubiquinone] 1 alpha subcomplex subunit 2	NDUFA2	Color2 [DarkGray]	1	4					2	2	2	31.3	31.3	31.3	10.921	0	53.635	719660000	44	24.9568	24.0487	24.5199	NaN	24.5229	25.1065	24.1995	24.09	24.0738	NaN	24.0787	23.5638	23.9958	24.8228	24.1896	23.4986	23.3673	25.1252	NaN	23.7988	24.6502	24.1725	24.6842	24.8513	24.4084
	0.532947	0.155661	P38606-2;P38606	P38606-2;P38606	V-type proton ATPase catalytic subunit A	ATP6V1A	Color2 [DarkGray]	1	4					18	18	18	54.8	54.8	54.8	64.735	0	323.31	7682100000	512	27.9544	27.0406	26.9047	26.5923	27.7982	27.9197	27.434	28.4311	27.0194	27.2653	27.194	27.1494	27.6597	27.1161	26.8226	26.6108	26.8571	27.4373	27.0035	28.0387	26.9307	26.9342	27.5836	27.4895	26.9562
	0.532936	-0.201823	P01730	P01730	T-cell surface glycoprotein CD4	CD4	Color2 [DarkGray]	1	4					2	2	2	6.6	6.6	6.6	51.11	0	58.336	171490000	62	21.9718	22.0007	22.2369	21.9764	22.1735	21.1495	21.2305	22.2047	NaN	22.7746	21.919	22.6561	20.8636	21.0168	22.6793	22.9137	22.0209	21.7192	21.768	22.2646	NaN	22.7302	22.317	21.4508	22.236
	0.532433	-0.114421	Q9Y262-2;Q9Y262	Q9Y262-2;Q9Y262	Eukaryotic translation initiation factor 3 subunit L	EIF3L	Color2 [DarkGray]	1	4					13	13	13	37.8	37.8	37.8	61.013	0	323.31	2168900000	266	25.649	25.7133	26.006	25.7587	25.8013	25.5362	25.7565	25.6588	25.3163	25.723	25.2999	25.924	25.3838	25.5232	26.1125	25.1402	25.164	25.8092	26.4227	26.1054	25.1627	26.1849	26.2746	25.9651	25.8762
	0.532143	0.310301	P61626	P61626	Lysozyme C	LYZ	Color2 [DarkGray]	1	4					5	5	5	41.2	41.2	41.2	16.537	0	323.31	8057600000	248	27.8986	26.748	26.7459	27.6674	27.2959	28.4945	27.9198	27.3766	28.7441	27.4345	27.748	28.6063	25.5909	27.2486	26.7487	26.9507	27.2938	27.2362	27.2635	27.4421	28.0341	26.3837	27.7056	26.4993	26.3884
	0.532079	-0.133794	Q9BZV1;Q9BZV1-2	Q9BZV1;Q9BZV1-2	UBX domain-containing protein 6	UBXN6	Color2 [DarkGray]	1	4					6	6	6	27	27	27	49.753	0	20.195	343380000	83	22.5546	24.127	23.2572	23.197	22.8756	22.9733	22.5945	22.8831	22.7726	23.4368	22.3413	23.1969	23.4253	22.7097	23.2006	NaN	23.7583	23.0425	23.3924	23.0957	23.1973	23.3002	22.651	23.0877	23.4191
	0.532019	-0.18556	Q9Y6C9	Q9Y6C9	Mitochondrial carrier homolog 2	MTCH2	Color2 [DarkGray]	1	4					6	6	6	33	33	33	33.331	0	323.31	1046900000	152	24.3284	23.4378	25.2518	23.841	24.2697	24.5899	24.0092	24.5197	24.1785	24.1479	24.1199	23.8842	23.6935	24.0346	25.33	23.8935	23.6434	24.4427	24.8764	25.1364	23.9238	24.5139	24.1613	24.8172	24.1005
	0.531645	-0.175026	P49750;P49750-1;P49750-3	P49750;P49750-1;P49750-3	YLP motif-containing protein 1	YLPM1	Color2 [DarkGray]	1	4					8	8	8	6.4	6.4	6.4	241.64	0	11.341	315050000	47	22.1461	22.7066	23.9427	NaN	NaN	23.1104	23.0282	22.7691	22.4384	22.8416	22.9757	23.5993	22.6994	22.7495	23.8274	22.4652	22.3979	23.1688	NaN	23.4963	23.0765	23.0541	22.868	NaN	23.6748
	0.531339	0.272278	P31937	P31937	3-hydroxyisobutyrate dehydrogenase, mitochondrial	HIBADH	Color2 [DarkGray]	1	4					8	8	8	36.3	36.3	36.3	35.329	0	108.51	350000000	91	23.3151	21.9865	23.8343	NaN	NaN	23.3986	23.0391	23.5022	22.5766	21.8491	23.4322	22.6058	23.2031	23.9971	24.7901	23.5855	23.2441	22.4541	23.8987	23.4783	22.7498	22.1105	22.4906	23.2338	21.9616
	0.530963	-0.283025	Q8WWX9	Q8WWX9	Selenoprotein M	SELM	Color2 [DarkGray]	1	4					3	3	3	24.8	24.8	24.8	16.231	0	323.31	353420000	71	22.7339	22.9232	21.8889	22.3127	22.4627	21.6864	22.3042	23.3442	23.7008	22.0647	22.7091	22.1877	21.7243	22.299	NaN	25.5963	23.8732	23.1555	22.644	21.7761	23.648	21.6273	22.4275	22.4893	22.5317
	0.530927	0.236181	Q6NZ67;Q6P582	Q6NZ67;Q6P582	Mitotic-spindle organizing protein 2B;Mitotic-spindle organizing protein 2A	MZT2B;MZT2A	Color2 [DarkGray]	1	4					4	4	4	44.3	44.3	44.3	16.225	0	19.623	297080000	56	23.2266	23.1654	22.7445	23.8372	23.9593	23.636	23.6798	NaN	22.7304	22.9092	22.7433	22.882	22.5543	23.1123	22.0259	22.2804	NaN	23.6259	23.3861	22.038	23.672	23.5917	23.1791	24.0072	22.6755
	0.529337	-0.251139	Q9NUP1	Q9NUP1	Biogenesis of lysosome-related organelles complex 1 subunit 4	BLOC1S4	Color2 [DarkGray]	1	4					4	4	4	35	35	35	23.351	0	33.516	202240000	52	22.9865	22.6549	22.3203	21.9449	23.179	21.7272	NaN	21.895	NaN	21.7465	22.1527	22.2236	21.7725	21.3746	20.6952	22.6534	24.1054	22.1747	22.1802	NaN	22.3907	21.7719	21.8566	22.1633	22.1186
	0.528527	-0.194268	O96019;O96019-2;O94805	O96019;O96019-2	Actin-like protein 6A	ACTL6A	Color2 [DarkGray]	1	4					8	8	8	29.1	29.1	29.1	47.46	0	323.31	1685000000	122	26.0108	25.1431	23.8467	25.6838	25.6636	24.9162	24.6723	24.8807	24.7941	25.7618	25.361	25.6078	25.0434	25.1412	25.2523	24.6128	23.9672	25.2134	25.5159	25.2388	25.0926	25.6072	25.4298	25.9436	26.1276
	0.52655	0.417092	P19652	P19652	Alpha-1-acid glycoprotein 2	ORM2	Color2 [DarkGray]	1	4					6	4	4	35.3	26.9	26.9	23.602	0	323.31	6370500000	203	27.6435	26.2626	25.5213	27.1737	24.5393	27.4686	27.9674	25.7055	29.1712	27.4196	29.2889	27.6351	26.5806	26.0789	26.3158	27.7917	27.0252	26.1285	25.4629	24.6511	27.3231	25.5455	27.7351	25.8491	26.4343
	0.525401	-0.209024	P10155;P10155-3;P10155-5;P10155-4;P10155-2	P10155;P10155-3;P10155-5;P10155-4;P10155-2	60 kDa SS-A/Ro ribonucleoprotein	TROVE2	Color2 [DarkGray]	1	4					9	9	9	27.5	27.5	27.5	60.67	0	45.498	1182800000	150	23.3821	24.5453	24.6336	24.7629	25.2725	23.9432	23.3907	24.643	24.1477	24.7939	23.9631	25.1563	24.6274	24.1576	24.2966	24.4925	26.2675	24.3454	24.801	23.8437	25.027	25.2571	24.4891	24.6307	24.7756
	0.525108	0.225834	Q9GZP4-2;Q9GZP4	Q9GZP4-2;Q9GZP4	PITH domain-containing protein 1	PITHD1	Color2 [DarkGray]	1	4					5	5	5	31	31	31	24.121	0	71.278	561820000	97	23.111	23.19	24.0349	23.2967	23.6702	23.7636	24.3037	23.9674	23.4029	24.0868	23.7787	23.6699	24.219	22.6644	24.7934	22.2808	24.1535	22.3544	24.2864	23.5586	23.0536	23.0047	23.7979	24.2394	23.6155
	0.524962	-0.319281	Q9BTW9;Q9BTW9-4;Q9BTW9-5;Q9BTW9-3;Q9BTW9-2	Q9BTW9;Q9BTW9-4;Q9BTW9-5	Tubulin-specific chaperone D	TBCD	Color2 [DarkGray]	1	4					10	10	10	15.7	15.7	15.7	132.6	0	63.876	324790000	79	22.0595	22.9521	24.7103	22.3691	21.6971	23.1403	NaN	23.0675	22.892	23.0261	NaN	23.4444	20.4368	NaN	23.2862	22.5266	22.4577	22.7387	23.279	24.0161	22.9837	23.7114	22.1166	22.8841	23.5602
	0.52325	-0.180882	P14868;P14868-2	P14868;P14868-2	Aspartate--tRNA ligase, cytoplasmic	DARS	Color2 [DarkGray]	1	4					11	11	11	26.7	26.7	26.7	57.136	0	323.31	7478400000	334	27.3886	27.2877	27.3533	27.8956	27.9792	26.9726	27.1368	27.5212	27.2352	27.5614	26.9719	27.8367	27.2978	25.728	27.358	26.4554	26.314	27.4296	27.7789	27.552	27.3473	27.8689	28.099	27.3552	27.32
	0.52277	-0.298737	Q13469-3;Q13469-4;Q13469-2;Q13469;Q13469-5	Q13469-3;Q13469-4;Q13469-2;Q13469	Nuclear factor of activated T-cells, cytoplasmic 2	NFATC2	Color2 [DarkGray]	1	4					7	7	7	13.4	13.4	13.4	97.691	0	64.782	1205900000	134	24.4484	25.1741	26.252	24.8746	25.6356	23.6593	24.1788	24.8727	22.4698	25.0435	24.5174	25.4043	23.3616	23.1843	24.2271	24.4497	23.9873	25.2464	25.5272	24.7035	24.3663	25.7555	25.0082	25.7041	25.2626
	0.522533	0.215912	P27797	P27797	Calreticulin	CALR	Color2 [DarkGray]	1	4					11	11	11	48.4	48.4	48.4	48.141	0	323.31	12506000000	632	28.5399	26.73	26.1474	28.1179	26.9787	27.9468	28.6014	28.1843	28.4975	27.6966	28.3474	27.7441	27.901	28.4861	27.5665	27.1355	26.8412	27.6212	26.9304	28.2118	27.7541	26.84	27.8671	27.506	27.3265
	0.521249	-0.257692	Q14978;Q14978-2;Q14978-3	Q14978;Q14978-2;Q14978-3	Nucleolar and coiled-body phosphoprotein 1	NOLC1	Color2 [DarkGray]	1	4					2	2	2	5.4	5.4	5.4	73.602	0	15.415	545400000	37	23.577	23.4151	23.8756	23.2392	24.8825	24.2253	NaN	23.1953	23.3452	23.5573	23.6072	24.2913	24.2799	22.6396	23.4977	23.4514	23.7899	22.5361	NaN	24.3571	25.4418	24.8755	NaN	24.8911	23.7332
	0.520452	-0.320315	O00329;O00329-2;P42338	O00329	Phosphatidylinositol 4,5-bisphosphate 3-kinase catalytic subunit delta isoform	PIK3CD	Color2 [DarkGray]	1	4					9	9	9	13.4	13.4	13.4	119.48	0	56.717	385410000	80	22.429	23.1317	24.4151	NaN	22.8536	22.7022	NaN	23.3127	NaN	23.6824	22.3406	23.7141	23.5235	NaN	23.4702	NaN	22.7847	23.0117	22.9729	24.6984	NaN	24.7679	23.5284	23.8362	24.0854
	0.520418	0.211881	P25686-2;P25686	P25686-2;P25686	DnaJ homolog subfamily B member 2	DNAJB2	Color2 [DarkGray]	1	4					3	3	3	18.4	18.4	18.4	30.568	0	42.059	322780000	57	23.3487	22.9912	22.7096	23.147	24.2595	22.6973	23.7519	23.4957	22.7641	22.4604	22.7737	22.5874	22.7756	NaN	23.1385	22.5766	21.6028	22.4827	23.5986	22.3963	NaN	23.2349	23.3629	23.0224	23.1115
	0.520418	0.146218	P47756-2;P47756	P47756-2;P47756	F-actin-capping protein subunit beta	CAPZB	Color2 [DarkGray]	1	4					11	11	11	52.2	52.2	52.2	30.628	0	313.99	11644000000	328	28.8414	28.1841	27.6521	28.3128	27.5808	27.8721	28.0821	28.6921	27.8695	28.2595	27.8371	27.6353	28.3995	27.9313	28.0599	26.8736	26.921	28.288	28.264	27.711	28.1051	27.7718	28.0015	27.957	27.992
	0.519461	0.202152	O43399-2;O43399-4;O43399;O43399-3;O43399-5;O43399-7;O43399-6	O43399-2;O43399-4;O43399;O43399-3;O43399-5;O43399-7;O43399-6	Tumor protein D54	TPD52L2	Color2 [DarkGray]	1	4					9	9	9	47.3	47.3	47.3	19.901	0	323.31	10088000000	319	28.7765	27.0866	26.6686	28.0669	27.9327	27.302	28.2672	28.2414	27.7791	27.2956	27.8541	27.4146	27.7388	28.094	26.5368	27.9399	26.9438	28.222	27.5134	26.6832	27.1981	27.2057	27.4781	27.3727	27.3274
	0.518849	-0.435471	Q8IXB1;Q8IXB1-2;Q8IXB1-3	Q8IXB1;Q8IXB1-2	DnaJ homolog subfamily C member 10	DNAJC10	Color2 [DarkGray]	1	4					4	4	4	9.5	9.5	9.5	91.079	0	50.113	156320000	38	NaN	21.9457	22.1153	22.2096	NaN	21.8738	22.9023	21.8578	20.4197	21.6559	22.3315	19.3976	20.0175	20.4676	21.1446	21.6843	24.5196	NaN	NaN	22.2595	19.6608	NaN	22.1872	NaN	21.9284
	0.51871	-0.426924	O60216	O60216	Double-strand-break repair protein rad21 homolog	RAD21	Color2 [DarkGray]	1	4					8	8	8	20.9	20.9	20.9	71.689	0	31.586	328820000	51	20.5857	22.2453	23.6472	NaN	22.9457	21.6118	22.4522	22.8577	NaN	23.016	22.6541	23.3617	21.8417	NaN	23.2166	22.9086	23.7205	NaN	NaN	24.3812	23.5455	22.372	23.2641	21.9198	23.4956
	0.515681	-0.36386	O60828-5;O60828-4;O60828-2;O60828;O60828-10;O60828-9;O60828-8;O60828-7;O60828-6;O60828-3	O60828-5;O60828-4;O60828-2;O60828	Polyglutamine-binding protein 1	PQBP1	Color2 [DarkGray]	1	4					3	3	3	41.2	41.2	41.2	18.706	0	45.48	528980000	37	23.1045	NaN	23.6495	23.1812	NaN	NaN	23.1132	22.5865	21.985	23.0528	22.0393	22.3502	22.6067	23.8748	23.1356	22.4408	26.7073	NaN	23.9197	22.7137	23.7317	22.295	23.7561	23.4524	23.2905
	0.515617	-0.268816	Q06546	Q06546	GA-binding protein alpha chain	GABPA	Color2 [DarkGray]	1	4					4	4	4	12.8	12.8	12.8	51.295	0	6.649	117110000	32	NaN	21.7578	22.4019	NaN	22.3373	NaN	NaN	21.7175	NaN	19.9951	21.7976	22.6412	22.108	NaN	21.7819	NaN	21.9397	NaN	21.6564	21.7317	22.1045	23.0022	22.0589	NaN	22.741
	0.514566	-0.196115	Q13496;Q13496-2	Q13496;Q13496-2	Myotubularin	MTM1	Color2 [DarkGray]	1	4					2	2	2	4.5	4.5	4.5	69.931	0	57.574	140710000	48	NaN	NaN	22.5101	21.3608	22.4343	21.2897	21.5058	21.4916	21.0164	21.916	21.3168	21.3369	22.013	21.1849	21.2388	22.8016	22.3971	21.9158	20.5988	22.1508	21.2312	22.2215	21.69	21.8898	22.1109
	0.514376	0.227219	Q99623;Q99623-2	Q99623;Q99623-2	Prohibitin-2	PHB2	Color2 [DarkGray]	1	4					11	11	11	43.5	43.5	43.5	33.296	0	323.31	3737900000	195	25.1183	25.7526	27.4724	25.8375	26.3922	26.9641	26.3847	26.0979	25.8139	26.3464	26.6409	26.5767	26.7411	27.1746	27.3469	26.0692	26.1315	25.6456	25.8096	27.3841	26.669	26.6483	25.7928	26.2333	25.8156
	0.513842	0.155866	P62879;P62879-2	P62879	Guanine nucleotide-binding protein G(I)/G(S)/G(T) subunit beta-2	GNB2	Color2 [DarkGray]	1	4					9	7	5	41.8	31.8	27.6	37.331	0	194.47	3166000000	196	26.5509	26.5663	25.6313	25.9166	26.2501	25.7362	26.3892	26.6153	26.2571	26.1063	26.1447	26.4801	26.754	26.0683	25.122	26.214	24.842	26.6366	25.955	26.5306	25.8157	25.5949	26.4916	25.7704	26.045
	0.512091	-0.211078	P14317;P14317-2	P14317	Hematopoietic lineage cell-specific protein	HCLS1	Color2 [DarkGray]	1	4					9	9	9	27.2	27.2	27.2	54.013	0	323.31	16849000000	445	28.8489	28.6392	27.3593	28.296	29.1719	27.5039	27.8604	28.6912	27.7993	28.7085	27.8459	28.501	28.6461	28.1478	28.2293	28.0799	26.8989	28.7984	28.9282	28.3225	27.8631	28.8892	28.8808	28.6167	28.8293
	0.512051	0.114346	P61020;P61020-2	P61020;P61020-2	Ras-related protein Rab-5B	RAB5B	Color2 [DarkGray]	1	4					5	3	3	32.1	21.9	21.9	23.707	0	92.084	474170000	102	22.9688	24.1293	23.6889	23.5965	23.8363	23.432	23.4405	23.7396	23.0304	23.4908	23.1334	23.7328	23.4659	23.481	23.8313	23.056	24.067	23.2179	23.5835	23.1703	23.5008	23.7498	23.1667	23.3594	23.1456
	0.51197	-0.339594	Q9BUQ8	Q9BUQ8	Probable ATP-dependent RNA helicase DDX23	DDX23	Color2 [DarkGray]	1	4					8	8	8	11.1	11.1	11.1	95.581	0	28.757	207040000	48	22.6414	NaN	23.5728	23.2846	22.5358	21.8268	21.3733	21.8154	NaN	23.2113	NaN	NaN	NaN	NaN	22.8381	NaN	NaN	23.9297	22.0564	23.8662	22.9228	23.1737	NaN	NaN	22.8874
	0.511643	-0.264635	P53367;P53367-2;P53367-3	P53367;P53367-2	Arfaptin-1	ARFIP1	Color2 [DarkGray]	1	4					5	5	5	20.4	20.4	20.4	41.738	0	16.069	502320000	43	22.9442	23.3857	24.0083	22.5576	24.5716	23.6018	23.9246	24.4544	23.933	23.5571	23.6551	23.1795	23.9122	23.8391	22.5554	22.5273	22.5549	NaN	25.0823	23.2241	NaN	23.6546	23.988	NaN	24.0704
	0.511609	0.218471	P0DMV9;P0DMV8;P0DMV8-2;P48741	P0DMV9;P0DMV8;P0DMV8-2	Heat shock 70 kDa protein 1B;Heat shock 70 kDa protein 1A	HSPA1B;HSPA1A	Color2 [DarkGray]	1	4					20	19	10	53.2	51.2	32	70.051	0	323.31	19991000000	771	28.8543	27.7945	27.851	28.4535	28.3883	28.8882	29.6563	28.7909	29.1924	28.5696	29.2108	29.2149	29.8866	29.656	28.4838	27.9421	28.1839	28.7981	28.0387	28.7189	28.6232	28.3112	28.614	27.7376	28.3168
	0.511219	-0.17592	P78527;P78527-2	P78527;P78527-2	DNA-dependent protein kinase catalytic subunit	PRKDC	Color2 [DarkGray]	1	4					88	88	88	30.4	30.4	30.4	469.08	0	323.31	8979200000	1244	26.8496	27.4238	27.9614	27.3485	27.6346	27.3464	27.2486	26.9311	27.1074	27.8037	27.2783	28.1177	27.264	27.3867	28.5989	27.2763	27.6536	26.6911	27.3416	28.2937	27.8897	27.6055	27.8353	26.203	28.0605
	0.51086	-0.298957	Q8N668;Q8N668-2	Q8N668;Q8N668-2	COMM domain-containing protein 1	COMMD1	Color2 [DarkGray]	1	4					4	4	4	47.9	47.9	47.9	21.178	0	133.21	1150600000	65	24.9591	25.9743	24.2125	24.2928	24.2714	24.2767	24.4116	24.2629	24.162	24.2508	24.235	23.5069	25.6524	24.2351	22.8035	25.4121	25.9184	23.4371	24.0646	24.1565	27.1483	24.1008	24.9498	25.2197	24.8626
	0.51008	0.252493	Q5JS54-3;Q5JS54;Q5JS54-2	Q5JS54-3;Q5JS54;Q5JS54-2	Proteasome assembly chaperone 4	PSMG4	Color2 [DarkGray]	1	4					3	3	3	58.7	58.7	58.7	11.216	0	11.075	86436000	29	22.223	NaN	21.8329	23.372	22.2728	21.4961	22.3184	21.5315	20.8522	NaN	21.8016	21.9505	NaN	21.1217	NaN	21.3425	20.7766	NaN	NaN	21.0542	21.508	22.5729	NaN	NaN	22.0372
	0.509809	0.258046	Q9P0R6	Q9P0R6	GSK3-beta interaction protein	GSKIP	Color2 [DarkGray]	1	4					3	3	3	30.2	30.2	30.2	15.648	0	119.04	871500000	60	25.0684	25.4116	23.7343	24.8973	25.4848	24.0336	24.7982	24.4694	24.2326	24.543	23.7734	23.6991	23.9161	23.9351	24.306	24.9522	22.8333	24.6079	24.1327	23.2656	23.6099	25.2167	24.7497	NaN	24.5607
	0.50935	-0.32173	P0DPI2-2;A0A0B4J2D5-2;P0DPI2;A0A0B4J2D5	P0DPI2-2;A0A0B4J2D5-2;P0DPI2;A0A0B4J2D5			Color2 [DarkGray]	1	4					2	2	2	19.8	19.8	19.8	24.757	0	10.236	552680000	42	22.1268	22.6701	NaN	NaN	NaN	NaN	24.9228	23.3204	23.2814	23.8394	24.1525	23.4709	24.1243	24.355	24.6836	23.6903	NaN	23.3621	22.7639	24.5163	24.3263	23.5993	NaN	25.1772	24.091
	0.507692	-0.110756	Q9UHY1	Q9UHY1	Nuclear receptor-binding protein	NRBP1	Color2 [DarkGray]	1	4					6	6	6	20.2	20.2	20.2	59.844	0	92.932	716300000	102	24.0268	24.388	24.1671	24.0441	24.3475	23.7512	23.8475	24.2901	23.6944	23.8294	24.0532	24.4289	24.0258	23.2984	23.95	23.9751	24.3449	24.1284	24.6257	23.7278	23.8583	24.6282	24.2285	24.4631	24.0547
	0.507421	-0.196812	P48556	P48556	26S proteasome non-ATPase regulatory subunit 8	PSMD8	Color2 [DarkGray]	1	4					4	4	4	12.6	12.6	12.6	39.611	0	106.87	349300000	231	22.7074	23.5967	22.673	21.855	22.6522	22.1672	21.5924	22.9902	22.2818	22.2637	22.369	22.1159	22.2884	20.9104	21.9542	22.875	23.3943	22.4277	21.8038	23.1318	21.7126	22.8013	22.5306	22.208	23.2285
	0.506895	0.402778	P07858	P07858	Cathepsin B;Cathepsin B light chain;Cathepsin B heavy chain	CTSB	Color2 [DarkGray]	1	4					8	8	8	31.3	31.3	31.3	37.821	0	323.31	25446000000	282	31.3601	28.2742	26.5169	30.3306	30.0723	27.2468	30.2674	30.328	29.9279	28.3763	29.6345	28.0869	29.0185	30.2731	27.6103	29.0203	29.052	29.3403	26.8376	28.9216	28.9672	29.1881	29.4031	29.3232	28.9511
	0.506786	0.196116	O95674	O95674	Phosphatidate cytidylyltransferase 2	CDS2	Color2 [DarkGray]	1	4					2	2	2	8.1	8.1	8.1	51.417	0	245.72	334340000	30	NaN	23.661	23.5585	23.036	23.6302	NaN	24.0372	NaN	22.7413	NaN	23.6798	23.8053	23.5893	NaN	23.9779	22.9883	22.7579	NaN	22.7177	24.4984	23.3605	NaN	NaN	23.013	23.3592
	0.506431	0.200861	Q99653	Q99653	Calcineurin B homologous protein 1	CHP1	Color2 [DarkGray]	1	4					5	5	5	37.9	37.9	37.9	22.456	0	80.383	1627700000	180	25.9138	25.4236	24.8478	25.9136	26.0049	25.5589	25.3016	25.2728	25.7007	24.8649	25.7016	24.9929	24.8299	25.5481	23.5008	24.4947	24.4044	25.979	25.4348	24.1271	25.6264	25.605	25.6009	25.3566	25.0417
	0.506377	-0.213736	Q9Y5J6	Q9Y5J6	Mitochondrial import inner membrane translocase subunit Tim10 B	TIMM10B	Color2 [DarkGray]	1	4					4	4	4	47.6	47.6	47.6	11.586	0	12.889	121060000	42	NaN	22.5309	21.9358	21.8636	NaN	21.5037	22.9326	21.5328	21.9757	22.1892	21.4481	21.3659	NaN	21.6394	NaN	NaN	NaN	22.2745	22.9719	NaN	21.8098	21.3544	22.0543	22.261	21.9231
	0.506234	0.23759	Q15208	Q15208	Serine/threonine-protein kinase 38	STK38	Color2 [DarkGray]	1	4					2	2	2	5.2	5.2	5.2	54.19	0.00049875	3.3761	72852000	26	NaN	20.5565	22.1515	21.7019	21.6832	NaN	NaN	21.639	NaN	21.4711	NaN	20.6357	21.1113	22.5222	22.0295	NaN	NaN	NaN	21.9613	21.4644	20.8509	20.9107	NaN	NaN	21.3322
	0.506108	-0.207837	P26368-2;P26368	P26368-2;P26368	Splicing factor U2AF 65 kDa subunit	U2AF2	Color2 [DarkGray]	1	4					12	12	12	44.8	44.8	44.8	53.12	0	253.79	2608300000	288	25.1668	25.3811	26.2113	25.69	26.0515	25.401	24.0732	25.6171	24.7346	26.2493	25.4631	26.4654	25.3475	25.5283	26.153	25.5403	24.7219	25.8216	25.2651	26.0441	25.8819	25.858	26.6976	26.1443	25.5389
	0.50534	-0.125071	P04350;CON__ENSEMBL:ENSBTAP00000025008	P04350	Tubulin beta-4A chain	TUBB4A	Color2 [DarkGray]	1	4					19	7	3	67.3	27	10.1	49.585	0	308.89	23583000000	480	28.2173	28.6979	28.6045	28.8709	28.4662	28.4469	28.4245	28.1387	28.5534	28.5293	28.1227	29.255	28.6059	28.1477	28.1467	28.8129	29.1944	28.9738	28.2503	28.0683	28.3188	28.0959	28.3506	28.8188	28.4137
	0.505077	0.282858	Q8IXM2-3;Q8IXM2;Q8IXM2-2	Q8IXM2-3;Q8IXM2;Q8IXM2-2	Chromatin complexes subunit BAP18	BAP18	Color2 [DarkGray]	1	4					6	6	6	47.9	47.9	47.9	19.961	0	33.823	1819700000	89	25.8433	25.2368	25.3788	25.4262	25.9577	23.8072	25.3648	25.9498	24.6593	25.2159	24.9556	26.1807	24.6038	24.5737	25.3297	24.4252	23.7602	25.6505	25.1673	22.0212	25.4486	25.561	25.6116	24.9224	25.52
	0.504619	0.110007	P68104;P68104-2;Q5VTE0	P68104;P68104-2;Q5VTE0	Elongation factor 1-alpha 1;Putative elongation factor 1-alpha-like 3	EEF1A1;EEF1A1P5	Color2 [DarkGray]	1	4					15	15	8	60	60	38.7	50.14	0	323.31	143160000000	1002	31.3214	31.1393	31.7836	31.2071	31.2797	31.9405	31.3	31.4744	31.6197	32.0005	31.6224	31.6679	31.8095	31.8859	32.3228	30.9467	30.9337	31.3066	31.4568	31.8937	31.4362	31.1352	31.3846	31.7276	31.2899
	0.504271	-0.194735	P53621;P53621-2	P53621;P53621-2	Coatomer subunit alpha;Xenin;Proxenin	COPA	Color2 [DarkGray]	1	4					27	27	27	31.3	31.3	31.3	138.34	0	323.31	3909400000	395	24.4167	25.7854	26.8548	25.5827	26.1418	26.3579	26.3942	26.0309	26.4243	26.5051	26.6996	26.7441	26.2836	26.8708	26.8567	26.5345	26.4357	25.9689	26.021	27.2086	26.6043	26.3754	25.9579	25.8823	26.4985
	0.503747	-0.316508	Q71UI9-2;Q71UI9;P0C0S5;Q71UI9-4;Q71UI9-3	Q71UI9-2;Q71UI9;P0C0S5;Q71UI9-4;Q71UI9-3	Histone H2A.V;Histone H2A.Z	H2AFV;H2AFZ	Color2 [DarkGray]	1	4					4	2	2	48.2	34.2	34.2	12.146	0	262.36	11347000000	109	27.7854	27.1721	28.0526	27.5949	25.1218	27.1809	27.3251	27.4599	26.991	28.5617	27.4338	28.5351	27.543	27.8203	29.3551	27.5487	26.4496	27.4717	27.71	28.4211	27.7799	27.9812	28.4396	28.6903	27.0072
	0.503205	-0.170616	Q3LXA3;Q3LXA3-2	Q3LXA3;Q3LXA3-2	Bifunctional ATP-dependent dihydroxyacetone kinase/FAD-AMP lyase (cyclizing);ATP-dependent dihydroxyacetone kinase;FAD-AMP lyase (cyclizing)	DAK	Color2 [DarkGray]	1	4					15	15	15	45.6	45.6	45.6	58.946	0	293.68	2848100000	341	26.2246	26.5316	26.0875	26.252	26.7946	25.6003	25.4851	25.3792	25.5952	26.3073	25.5804	26.5517	26.0952	24.7662	25.6764	25.8856	25.5244	26.1729	26.5831	25.3524	26.3766	26.7455	25.9143	25.9711	26.2295
	0.502615	-0.50257	P06127	P06127	T-cell surface glycoprotein CD5	CD5	Color2 [DarkGray]	1	4					4	4	4	12.3	12.3	12.3	54.577	0	323.31	894450000	39	25.4547	25.0667	24.407	24.2578	24.8833	19.4111	NaN	24.1002	NaN	24.7574	23.8327	25.5389	23.8888	NaN	23.9974	NaN	21.7953	24.8002	24.0475	23.9914	NaN	25.6687	25.9661	24.1519	24.0914
	0.5019	0.297889	Q969H8	Q969H8	Myeloid-derived growth factor	MYDGF	Color2 [DarkGray]	1	4					3	3	3	20.8	20.8	20.8	18.795	0	7.1	286670000	35	NaN	22.1758	23.2453	24.1771	NaN	NaN	23.954	23.6316	23.6506	22.8849	23.0501	22.126	23.4144	23.7589	21.994	NaN	22.6951	23.3924	22.6668	23.4233	23.3982	21.8914	NaN	NaN	22.8208
	0.501892	0.408899	P02792	P02792	Ferritin light chain	FTL	Color2 [DarkGray]	1	4					7	7	7	43.4	43.4	43.4	20.019	0	139.69	71939000000	343	32.3272	29.9163	29.3803	31.128	30.4215	30.7643	31.4796	31.9867	31.8049	31.1121	31.2166	30.0431	29.0071	31.5857	28.1271	30.6944	27.7391	31.5182	31.2166	30.1952	30.8093	30.194	31.3111	28.2044	30.058
	0.501635	-0.337811	O75170-6;O75170-2;O75170-4;O75170-5;O75170;O75170-3	O75170-6;O75170-2;O75170-4;O75170-5;O75170;O75170-3	Serine/threonine-protein phosphatase 6 regulatory subunit 2	PPP6R2	Color2 [DarkGray]	1	4					3	3	3	7	7	7	98.125	0	18.356	235570000	39	NaN	24.0593	23.3784	22.5476	23.0329	22.1536	NaN	20.0348	22.5354	23.0178	21.4953	22.5026	NaN	NaN	21.6805	NaN	21.2669	23.5837	23.3827	NaN	NaN	22.6847	22.9792	22.566	23.1009
	0.500953	0.367549	P21854	P21854	B-cell differentiation antigen CD72	CD72	Color2 [DarkGray]	1	4					2	2	2	6.4	6.4	6.4	40.22	0	74.27	136770000	28	20.8789	22.9897	23.2915	22.1267	22.8986	21.0161	NaN	22.2522	NaN	NaN	NaN	NaN	23.6572	NaN	22.3313	NaN	NaN	22.7009	23.379	22.0193	20.5782	21.7414	21.0951	23.0051	21.5743
	0.499853	0.340136	Q71UM5;P42677	Q71UM5;P42677	40S ribosomal protein S27-like;40S ribosomal protein S27	RPS27L;RPS27	Color2 [DarkGray]	1	4					2	2	2	28.6	28.6	28.6	9.4771	0	28.945	2493900000	54	26.373	26.3458	27.1694	NaN	25.5941	26.3523	26.2283	26.9482	25.6114	26.1075	23.5256	25.3436	25.3088	25.5066	26.2205	24.9922	25.3751	26.1772	27.1344	26.5117	24.4682	26.2842	26.2514	26.5113	25.3092
	0.49788	0.231018	P20290-2;P20290	P20290-2;P20290	Transcription factor BTF3	BTF3	Color2 [DarkGray]	1	4					6	6	6	68.5	68.5	68.5	17.699	0	281.39	2407000000	199	25.219	26.0683	24.952	25.971	26.0566	25.2969	25.0137	26.4606	25.305	25.6098	25.5807	26.3351	26.6506	24.8038	25.6416	26.2002	24.7293	25.6303	26.2538	24.2003	24.9858	26.5598	26.3929	26.2217	25.8228
	0.497714	-0.159362	Q9Y3L3;Q9Y3L3-2	Q9Y3L3;Q9Y3L3-2	SH3 domain-binding protein 1	SH3BP1	Color2 [DarkGray]	1	4					13	13	3	30.7	30.7	8.3	75.712	0	323.31	4690600000	371	26.5848	26.2963	27.3043	26.8797	27.1279	26.3766	26.4674	26.9021	26.0597	26.8176	26.17	26.8184	26.7371	26.1055	26.4357	26.3911	26.4539	27.0569	27.2751	26.77	26.551	27.2514	26.8531	27.13	27.3509
	0.4977	-0.200013	Q06787-11;Q06787-10;Q06787-8;Q06787-6;Q06787-2;Q06787-4;Q06787-5;Q06787-9;Q06787-7;Q06787-3;Q06787	Q06787-11;Q06787-10;Q06787-8;Q06787-6;Q06787-2;Q06787-4;Q06787-5;Q06787-9;Q06787-7;Q06787-3;Q06787	Fragile X mental retardation protein 1	FMR1	Color2 [DarkGray]	1	4					3	3	2	8.1	8.1	4.5	58.834	0	54.575	244680000	75	21.0522	23.6455	22.7414	22.0897	22.7788	22.3849	22.1179	22.6711	22.0577	22.6477	22.2515	22.2907	22.5707	21.4337	21.9059	NaN	23.8899	22.719	NaN	23.0401	22.9099	22.8898	21.4979	22.5031	22.7634
	0.497087	-0.187151	P49902-2;P49902	P49902-2;P49902	Cytosolic purine 5-nucleotidase	NT5C2	Color2 [DarkGray]	1	4					7	7	7	22	22	22	61.44	0	125.65	644460000	70	23.34	24.7676	NaN	22.8509	23.3359	23.3003	23.8449	23.5929	23.8535	23.9516	23.5463	25.0121	24.0327	24.0435	23.8273	24.0795	24.825	22.7753	24.0935	24.089	24.701	24.0672	23.6661	23.3648	24.1262
	0.496966	-0.487512	Q14683	Q14683	Structural maintenance of chromosomes protein 1A	SMC1A	Color2 [DarkGray]	1	4					10	10	10	11	11	11	143.23	0	323.31	988720000	64	NaN	NaN	24.1834	23.1955	NaN	23.9811	NaN	23.443	22.1654	24.9099	23.5099	24.737	NaN	NaN	27.2134	NaN	25.8483	24.2593	22.1439	24.6823	24.06	24.6624	24.7297	NaN	24.889
	0.494484	-0.161682	P49915;P49915-2	P49915;P49915-2	GMP synthase [glutamine-hydrolyzing]	GMPS	Color2 [DarkGray]	1	4					7	7	7	15.7	15.7	15.7	76.715	0	58.237	849490000	111	22.8699	25.2111	23.7895	24.618	24.264	24.4585	24.2169	24.2199	23.313	24.7972	24.1492	24.6044	24.129	23.993	23.3728	24.5405	23.9649	23.6984	24.0689	24.2383	25.3148	24.1201	24.6001	24.279	24.4551
	0.493236	-0.382202	Q06828	Q06828	Fibromodulin	FMOD	Color2 [DarkGray]	1	4					7	7	7	30.6	30.6	30.6	43.178	0	115.01	1371200000	128	NaN	24.6129	24.0363	23.1042	24.0377	22.1792	NaN	23.3781	25.8816	25.4693	24.5987	24.4385	25.5322	24.8629	24.6363	24.7691	25.6497	23.2581	25.0767	22.7837	26.1222	24.928	24.3089	23.7091	24.2973
	0.493062	-0.085711	Q9Y490	Q9Y490	Talin-1	TLN1	Color2 [DarkGray]	1	4					75	75	68	51	51	48.2	269.76	0	323.31	49977000000	2559	29.3307	29.652	30.07	29.8505	30.3256	30.2173	29.7436	30.1846	29.7552	30.0584	29.7561	30.1592	30.4173	30.0884	30.0723	29.9541	29.9577	30.0196	29.8206	30.2934	30.1663	30.0903	29.7929	29.6364	30.1865
	0.49287	-0.359991	P09543-2;P09543	P09543-2;P09543	2,3-cyclic-nucleotide 3-phosphodiesterase	CNP	Color2 [DarkGray]	1	4					4	4	4	18.5	18.5	18.5	45.098	0	59.065	439530000	65	21.6433	NaN	23.8634	22.8438	22.5251	23.7781	23.5369	20.7628	22.5734	NaN	23.2074	23.3275	23.8689	22.8602	23.8159	24.1727	24.9551	22.1128	23.2754	23.8892	24.25	23.199	19.93	23.5571	23.2869
	0.492335	0.14443	Q15435;Q15435-2;Q15435-3;Q15435-5;Q15435-4	Q15435;Q15435-2;Q15435-3;Q15435-5;Q15435-4	Protein phosphatase 1 regulatory subunit 7	PPP1R7	Color2 [DarkGray]	1	4					15	15	15	62.2	62.2	62.2	41.564	0	323.31	6333500000	322	28.0185	27.6402	26.775	27.4193	27.4897	27.5376	27.5485	27.4324	26.2407	27.2614	26.8238	27.8032	27.1772	26.4558	26.6544	27.4536	26.516	27.456	27.3209	26.6999	26.7667	27.5557	27.6288	27.0943	26.963
	0.492288	-0.185518	Q86W42-3;Q86W42;Q86W42-2	Q86W42-3;Q86W42;Q86W42-2	THO complex subunit 6 homolog	THOC6	Color2 [DarkGray]	1	4					3	3	3	15.2	15.2	15.2	32.89	0	6.1641	355330000	38	22.3295	23.4216	23.4934	23.7096	23.7818	22.8595	NaN	22.627	22.3599	22.8954	22.9328	23.0407	23.289	22.3218	22.4589	23.8614	24.3427	23.5482	23.0003	22.5215	NaN	NaN	22.5885	22.6948	23.139
	0.492146	-0.172119	P42166;P42167-3	P42166	Lamina-associated polypeptide 2, isoform alpha;Thymopoietin;Thymopentin	TMPO	Color2 [DarkGray]	1	4					15	15	8	38.2	38.2	22.5	75.491	0	323.31	10508000000	197	27.7368	27.7065	28.3222	27.603	27.5789	27.6293	27.622	27.7953	27.0429	28.2691	27.6877	28.152	27.7337	27.5475	28.3748	27.4201	27.3196	27.8341	28.1338	28.5863	27.1394	29.0535	27.7799	28.4719	27.6199
	0.491055	0.199137	P11310;P11310-2	P11310;P11310-2	Medium-chain specific acyl-CoA dehydrogenase, mitochondrial	ACADM	Color2 [DarkGray]	1	4					6	6	6	17.6	17.6	17.6	46.588	0	323.31	1356200000	92	25.1348	24.7219	26.1461	24.943	NaN	25.0304	25.3888	26.5564	24.5934	25.0736	25.036	24.6466	24.6185	25.6748	24.5025	24.9313	24.3766	25.3565	24.497	25.7921	24.244	24.5896	24.7927	25.6696	24.5562
	0.490796	-0.0754061	P07437	P07437	Tubulin beta chain	TUBB	Color2 [DarkGray]	1	4					19	19	4	64	64	13.5	49.67	0	323.31	246650000000	3865	31.8684	32.0746	32.4496	32.0406	32.111	31.9283	31.908	31.607	31.8546	32.2389	31.7826	32.0612	31.7871	31.7613	31.9714	31.6308	31.5254	31.9468	31.9899	32.2573	32.2102	32.0976	31.7547	32.1199	32.1452
	0.490673	0.4552	Q9P258	Q9P258	Protein RCC2	RCC2	Color2 [DarkGray]	1	4					10	10	10	27	27	27	56.084	0	30.886	630830000	69	22.7765	NaN	23.8899	NaN	NaN	24.2193	24.7831	24.4303	NaN	24.8022	23.5256	24.1636	23.553	23.3041	26.056	22.8174	22.472	NaN	20.8827	25.5562	NaN	NaN	23.6611	23.5573	23.5395
	0.490612	0.17613	P22626;P22626-2	P22626;P22626-2	Heterogeneous nuclear ribonucleoproteins A2/B1	HNRNPA2B1	Color2 [DarkGray]	1	4					15	15	15	53.8	53.8	53.8	37.429	0	323.31	51956000000	885	30.2538	30.4164	31.007	30.8629	29.8063	29.8397	30.2749	29.8824	29.4077	30.3052	29.4582	30.0133	30.2375	29.3587	30.6749	29.2233	29.4894	29.5357	30.4423	30.5009	30.1234	30.0212	30.3946	31.0291	30.2181
	0.49056	0.166693	Q15404;Q15404-2	Q15404;Q15404-2	Ras suppressor protein 1	RSU1	Color2 [DarkGray]	1	4					9	9	9	56.3	56.3	56.3	31.54	0	183.95	2032000000	143	26.4129	25.5465	25.602	25.3893	23.5335	26.2525	25.8316	25.9583	25.1873	25.1752	25.258	25.5174	25.8208	25.5322	25.65	25.509	25.7935	25.3581	25.5306	25.3626	25.8694	25.3931	25.8574	25.3421	25.0947
	0.490158	0.109736	P67775;P62714;P67775-2	P67775;P62714;P67775-2	Serine/threonine-protein phosphatase 2A catalytic subunit alpha isoform;Serine/threonine-protein phosphatase 2A catalytic subunit beta isoform	PPP2CA;PPP2CB	Color2 [DarkGray]	1	4					9	9	8	53.4	53.4	48.9	35.594	0	323.31	3356500000	280	26.7756	26.1361	26.1187	26.5153	26.2778	26.0508	26.2965	26.1447	25.9468	26.3903	26.1563	26.6189	26.0496	26.2492	26.2123	25.5272	25.4672	26.6509	26.4894	26.6433	26.1266	25.6794	26.4236	25.984	26.3263
	0.489962	-0.25516	P30047;P30047-2	P30047;P30047-2	GTP cyclohydrolase 1 feedback regulatory protein	GCHFR	Color2 [DarkGray]	1	4					3	3	3	60.7	60.7	60.7	9.6981	0	8.1048	197350000	38	22.7877	20.3194	22.7938	22.879	23.0114	22.5518	22.5239	22.1463	22.1107	23.2604	22.4234	22.4715	NaN	NaN	21.6805	NaN	NaN	22.6005	23.8141	21.7832	NaN	NaN	23.3669	23.0555	22.3536
	0.489807	0.158289	P80217;P80217-2	P80217;P80217-2	Interferon-induced 35 kDa protein	IFI35	Color2 [DarkGray]	1	4					8	8	8	44.8	44.8	44.8	31.546	0	197.55	1903200000	187	25.419	25.7308	25.452	25.5923	25.875	25.4411	25.1757	25.1819	24.7569	25.407	24.9192	25.2926	26.2212	24.4517	25.2681	25.0556	25.7159	25.9973	25.7256	25.2182	25.2033	25.4567	25.1936	25.8194	24.7458
	0.489807	-0.16282	Q9UBQ7;Q9UBQ7-2	Q9UBQ7	Glyoxylate reductase/hydroxypyruvate reductase	GRHPR	Color2 [DarkGray]	1	4					8	8	8	44.5	44.5	44.5	35.668	0	323.31	2721700000	173	25.9503	25.0956	26.4917	25.3326	25.2541	25.5203	25.0832	25.3552	26.2787	26.4099	26.0209	25.9752	26.5346	26.031	26.51	25.3683	25.8461	25.6329	25.5178	25.9558	25.9746	26.2224	26.0657	25.4935	26.1293
	0.489263	0.317654	P07948-2;P07948	P07948-2;P07948	Tyrosine-protein kinase Lyn	LYN	Color2 [DarkGray]	1	4					13	13	11	39.1	39.1	36	56.033	0	193.98	784030000	136	22.887	23.6199	24.836	22.376	24.0349	24.6134	24.542	25.4828	23.5899	24.3505	22.2097	23.1012	26.3834	23.9557	25.3693	22.96	23.2175	24.3495	24.7721	25.2675	24.1231	23.542	23.2918	23.4718	22.7523
	0.48913	-0.255015	Q12904;Q12904-2	Q12904;Q12904-2	Aminoacyl tRNA synthase complex-interacting multifunctional protein 1;Endothelial monocyte-activating polypeptide 2	AIMP1	Color2 [DarkGray]	1	4					4	4	4	21.5	21.5	21.5	34.352	0	11.113	391850000	43	NaN	22.4447	23.3574	23.6453	NaN	23.8999	24.2567	24.1479	NaN	NaN	22.7606	23.6494	24.4547	NaN	23.2094	23.0801	NaN	NaN	24.1873	23.865	22.9627	24.6412	24.1007	23.9692	23.3155
	0.488904	-0.189056	Q06210-2;Q06210	Q06210-2;Q06210	Glutamine--fructose-6-phosphate aminotransferase [isomerizing] 1	GFPT1	Color2 [DarkGray]	1	4					12	12	8	25.6	25.6	17.8	76.758	0	323.31	1309200000	226	24.5205	24.8412	23.9946	25.1958	25.2262	25.0623	24.7186	24.9529	24.0365	24.7815	24.1822	25.3983	24.1012	25.2459	24.61	23.7565	24.6159	25.3222	24.882	25.0527	24.7306	25.2478	25.3672	24.3418	25.1179
	0.488654	0.156835	Q96I24;Q96I24-2	Q96I24;Q96I24-2	Far upstream element-binding protein 3	FUBP3	Color2 [DarkGray]	1	4					9	8	8	25.5	24	24	61.64	0	36.285	565360000	116	24.6643	23.8401	23.7547	24.0926	24.503	23.6671	23.9518	23.3457	23.5092	23.7792	23.4241	23.7457	23.4742	NaN	23.7212	23.2476	22.6956	24.2393	23.1171	24.1142	23.8628	23.2909	23.7869	23.6896	23.6563
	0.487427	-0.206885	Q9Y6A4	Q9Y6A4	Cilia- and flagella-associated protein 20	CFAP20	Color2 [DarkGray]	1	4					3	3	3	20.7	20.7	20.7	22.774	0	26.353	340300000	32	NaN	22.8259	23.8725	23.7102	22.0662	NaN	NaN	22.6181	23.4322	23.4923	22.3831	23.4397	NaN	22.7878	23.5958	NaN	23.116	NaN	23.6968	23.4076	NaN	24.2876	23.0467	23.0186	23.2165
	0.485536	-0.310042	Q05048	Q05048	Cleavage stimulation factor subunit 1	CSTF1	Color2 [DarkGray]	1	4					3	3	3	12.8	12.8	12.8	48.357	0.00026802	4.5866	200030000	22	22.3597	21.0775	NaN	23.3822	NaN	22.564	NaN	22.0043	NaN	22.5174	22.6512	NaN	22.804	NaN	23.4387	21.8887	NaN	NaN	NaN	22.9719	22.8405	23.0892	NaN	22.3051	22.6683
	0.484809	0.116015	P30041	P30041	Peroxiredoxin-6	PRDX6	Color2 [DarkGray]	1	4					13	13	13	66.1	66.1	66.1	25.035	0	323.31	16845000000	599	29.1102	29.071	27.9269	28.4556	28.473	28.4971	28.141	28.6138	28.8191	28.4364	28.3676	28.5076	28.5891	28.5906	28.2351	27.9481	28.8937	28.6398	28.2971	27.8262	27.7965	28.7626	28.5954	28.5197	28.1756
	0.483658	-0.273995	Q8ND30;Q8ND30-3;Q8ND30-2	Q8ND30;Q8ND30-3;Q8ND30-2	Liprin-beta-2	PPFIBP2	Color2 [DarkGray]	1	4					4	4	3	7.6	7.6	6.3	98.543	0	130.32	155330000	33	20.8608	22.8672	21.5119	22.1363	22.5712	NaN	22.2875	21.4963	21.9457	22.3465	22.6871	22.0326	20.3785	23.1679	22.2163	NaN	NaN	22.0359	22.4815	22.0525	23.7198	NaN	21.4256	NaN	22.8598
	0.483464	-0.249897	Q16706	Q16706	Alpha-mannosidase 2	MAN2A1	Color2 [DarkGray]	1	4					4	4	4	5.3	5.3	5.3	131.14	0	114.42	206480000	40	NaN	21.7215	22.8435	21.4574	21.7144	22.2425	23.4561	21.7225	NaN	21.7405	22.903	22.29	22.348	23.5745	22.3635	22.9019	NaN	22.0801	21.6985	22.598	23.0613	22.572	21.3866	NaN	NaN
	0.483039	0.186631	P23634-6;P23634;P23634-8;P23634-7;P23634-4;P23634-3;P23634-5;P23634-2;Q16720-8;Q16720-2;Q16720;Q16720-4;Q16720-5;Q16720-3;Q16720-6;Q16720-7;Q01814-8;Q01814-5;Q01814-3;Q01814-2;Q01814-6;Q01814-7;Q01814-4;Q01814	P23634-6;P23634;P23634-8;P23634-7;P23634-4;P23634-3;P23634-5;P23634-2	Plasma membrane calcium-transporting ATPase 4	ATP2B4	Color2 [DarkGray]	1	4					8	8	5	9.6	9.6	5.4	133.93	0	323.31	382350000	55	23.3641	23.4072	23.4717	22.8888	23.9152	23.443	22.5258	23.2708	22.7878	23.4895	23.3425	24.2568	23.2718	NaN	22.8068	23.442	23.8064	22.6053	NaN	23.309	22.5069	23.2508	22.9063	22.45	23.4031
	0.482759	0.489208	P63313	P63313	Thymosin beta-10	TMSB10	Color2 [DarkGray]	1	4					3	3	3	54.5	54.5	54.5	5.0256	0	115.45	86033000000	292	31.8755	30.1689	27.8022	31.741	31.7433	29.268	30.5842	30.2605	30.1528	30.0642	30.4071	30.1651	30.6368	31.182	28.0767	29.9693	28.5101	31.7812	30.4165	28.9175	27.6216	30.8788	30.083	30.8297	30.5201
	0.482017	0.179821	Q9ULZ3;Q9ULZ3-2;Q9ULZ3-3	Q9ULZ3;Q9ULZ3-2;Q9ULZ3-3	Apoptosis-associated speck-like protein containing a CARD	PYCARD	Color2 [DarkGray]	1	4					8	8	8	46.7	46.7	46.7	21.627	0	323.31	4010400000	229	27.0011	27.0913	26.5493	26.403	25.9584	26.7727	26.3965	27.4831	26.4078	25.8478	26.104	26.0424	27.4768	26.3333	26.2852	26.8421	25.4406	27.3849	26.3296	26.4024	26.2843	26.2548	26.5836	27.1357	26.2736
	0.481143	0.419139	Q8WXC6	Q8WXC6	Myeloma-overexpressed gene 2 protein	MYEOV2	Color2 [DarkGray]	1	4					2	2	2	100	100	100	6.2107	0	70.124	2572900000	43	25.3913	26.2329	25.1063	26.5735	26.9546	25.8854	26.1951	26.1405	26.166	25.2739	25.9905	25.6888	26.0245	NaN	NaN	26.8105	20.9166	25.8119	25.8092	24.3857	27.511	26.7886	25.4367	26.4936	26.6786
	0.480563	-0.257283	Q32MZ4-3;Q32MZ4-2;Q32MZ4;Q32MZ4-4	Q32MZ4-3;Q32MZ4-2;Q32MZ4;Q32MZ4-4	Leucine-rich repeat flightless-interacting protein 1	LRRFIP1	Color2 [DarkGray]	1	4					6	6	6	15.3	15.3	15.3	82.688	0	267.16	734810000	159	24.4934	24.9261	22.6712	22.9838	23.3803	22.6544	22.8741	23.7724	24.1053	23.6632	24.095	23.6737	NaN	23.4425	22.7668	25.1949	23.3452	23.7272	22.9181	23.6784	22.0703	23.587	24.3326	23.8143	23.4164
	0.479317	-0.257512	Q9NWV8-3;Q9NWV8;Q9NWV8-2	Q9NWV8-3;Q9NWV8	BRISC and BRCA1-A complex member 1	BABAM1	Color2 [DarkGray]	1	4					3	3	3	34.5	34.5	34.5	18.62	0	7.8021	331370000	30	NaN	23.2751	NaN	22.8572	23.6212	NaN	23.2919	23.1251	NaN	NaN	NaN	23.9325	23.0854	22.2986	22.717	22.8865	NaN	23.2179	23.6985	21.9198	23.2351	22.9773	23.6655	23.5006	23.034
	0.479015	0.188137	P52294	P52294	Importin subunit alpha-5;Importin subunit alpha-5, N-terminally processed	KPNA1	Color2 [DarkGray]	1	4					8	5	5	29.7	22.5	22.5	60.221	0	105.9	209170000	39	NaN	21.9413	22.9012	23.0869	NaN	23.2405	NaN	22.3707	NaN	22.8614	22.4386	NaN	22.6081	23.6117	23.3174	NaN	21.3616	23.1386	22.8878	23.3239	22.6718	22.7439	NaN	22.7698	22.5857
	0.477836	0.185335	Q9UBW8	Q9UBW8	COP9 signalosome complex subunit 7a	COPS7A	Color2 [DarkGray]	1	4					5	5	5	31.3	31.3	31.3	30.276	0	323.31	344010000	54	NaN	23.3166	22.6108	23.6804	23.95	22.7991	22.6995	23.5526	23.1463	22.8982	23.0986	NaN	23.1669	23.1654	23.5769	22.4841	22.8797	23.3273	NaN	22.0714	24.1026	NaN	22.1368	22.8386	23.0723
	0.47767	0.147709	Q99471;Q99471-2;Q99471-3	Q99471;Q99471-2;Q99471-3	Prefoldin subunit 5	PFDN5	Color2 [DarkGray]	1	4					4	4	4	42.9	42.9	42.9	17.328	0	323.31	2096200000	170	26.017	25.9999	25.1837	26.3064	26.0155	25.2703	25.8884	25.8465	24.6621	25.7868	25.1307	25.7642	25.5518	25.3191	25.1918	24.6965	24.8913	25.6116	25.8225	24.5902	25.3467	26.0045	25.9296	25.9566	25.7085
	0.477577	0.154988	Q3KQU3-2;Q3KQU3-4;Q3KQU3;Q3KQU3-3	Q3KQU3-2;Q3KQU3-4;Q3KQU3;Q3KQU3-3	MAP7 domain-containing protein 1	MAP7D1	Color2 [DarkGray]	1	4					4	4	4	7.1	7.1	7.1	88.725	0	35.217	607700000	67	23.7585	24.1717	23.5095	24.5247	24.2671	23.8527	NaN	23.7883	24.0425	23.1998	24.0228	23.804	24.4222	24.1965	22.8719	24.8418	24.1901	24.329	23.3843	23.7881	24.2649	24.1528	23.0081	23.877	23.9563
	0.476547	-0.160241	Q9UPT8	Q9UPT8	Zinc finger CCCH domain-containing protein 4	ZC3H4	Color2 [DarkGray]	1	4					3	3	3	5.2	5.2	5.2	140.26	0	28.744	325010000	47	22.5232	22.4644	23.6699	23.3573	23.67	23.1605	22.91	22.6986	NaN	23.2501	22.6611	23.2342	23.2324	22.9117	23.4212	21.8288	NaN	NaN	23.459	23.3994	23.6259	23.3074	24.0283	22.9824	23.451
	0.476517	-0.0870182	Q14204	Q14204	Cytoplasmic dynein 1 heavy chain 1	DYNC1H1	Color2 [DarkGray]	1	4					101	101	101	34.1	34.1	34.1	532.4	0	323.31	16574000000	1642	28.0298	28.4502	28.5442	28.353	28.8258	28.5335	28.2336	28.4945	28.5196	28.3137	28.3544	28.4553	28.5885	28.5564	28.5851	28.5313	29.0945	28.6167	28.135	28.8139	28.7562	28.5368	27.9642	28.1547	28.4615
	0.475874	0.219223	Q13617;Q13617-2	Q13617;Q13617-2	Cullin-2	CUL2	Color2 [DarkGray]	1	4					7	7	7	11.1	11.1	11.1	86.982	0	10.838	134000000	50	22.0252	23.0369	22.1542	NaN	21.7876	22.0307	21.0843	22.0554	NaN	22.5562	NaN	21.9211	21.4196	NaN	21.2701	22.5044	22.3758	21.2209	20.8339	22.0751	21.7598	21.7673	21.5281	21.6473	20.7273
	0.475572	0.331256	Q13509;Q13509-2	Q13509;Q13509-2	Tubulin beta-3 chain	TUBB3	Color2 [DarkGray]	1	4					16	4	4	48.4	18.4	18.4	50.432	0	89.284	688230000	63	24.8118	NaN	25.3117	25.3567	24.1338	NaN	23.6591	NaN	25.3884	23.5169	24.9553	23.392	25.1665	24.5162	NaN	NaN	23.9252	24.2405	23.4125	NaN	24.6674	24.6993	24.3717	25.3673	23.3151
	0.474738	0.203304	Q9UBS4	Q9UBS4	DnaJ homolog subfamily B member 11	DNAJB11	Color2 [DarkGray]	1	4					6	6	6	33.8	33.8	33.8	40.513	0	323.31	767000000	48	NaN	NaN	23.9001	24.6847	23.9147	24.2787	25.4821	24.1845	24.043	24.4568	24.9335	25.0287	24.2879	23.6909	23.8265	24.4315	23.1991	24.1691	NaN	24.6804	24.1885	23.1346	23.6275	23.2032	24.2191
	0.474287	0.16795	Q86X55-2;Q86X55-1;Q86X55	Q86X55-2;Q86X55-1;Q86X55	Histone-arginine methyltransferase CARM1	CARM1	Color2 [DarkGray]	1	4					5	5	5	24	24	24	41.884	0	38.216	407920000	60	24.1171	22.9336	22.7416	23.1863	24.2065	23.7769	23.5919	23.1871	23.5851	23.3086	23.5116	23.7581	23.733	23.5784	22.5325	23.0627	22.2026	24.009	23.5377	23.5277	23.9404	22.8814	23.9582	23.0835	23.1271
	0.4738	-0.204269	P53582	P53582	Methionine aminopeptidase 1	METAP1	Color2 [DarkGray]	1	4					5	5	5	16.3	16.3	16.3	43.215	0	10.442	329100000	33	23.3923	22.7432	23.9066	23.2571	23.4778	NaN	22.9523	NaN	22.4711	23.2382	22.2825	23.1933	22.7511	NaN	24.081	22.4163	21.9772	NaN	23.6261	23.2745	23.5544	23.6095	22.9586	NaN	23.489
	0.472621	-0.274391	Q9HC35;Q9HC35-2	Q9HC35;Q9HC35-2	Echinoderm microtubule-associated protein-like 4	EML4	Color2 [DarkGray]	1	4					16	16	16	24.5	24.5	24.5	108.91	0	323.31	2309300000	171	26.7193	26.3984	25.437	25.7076	23.7568	24.9902	24.301	25.4166	24.9649	26.1144	25.5413	26.0209	24.5512	26.2821	26.549	24.0073	24.0863	26.3654	25.6306	26.6027	25.0732	25.8145	26.2968	25.139	26.2781
	0.47055	-0.204912	Q12824-2;Q12824	Q12824-2;Q12824	SWI/SNF-related matrix-associated actin-dependent regulator of chromatin subfamily B member 1	SMARCB1	Color2 [DarkGray]	1	4					5	5	5	27.1	27.1	27.1	43.158	0	77.049	121950000	42	21.5124	21.5742	NaN	22.0441	21.8977	22.0616	NaN	21.0394	NaN	22.1199	NaN	21.6976	21.144	NaN	21.2556	20.7854	21.1164	22.1134	22.2446	22.7599	21.0297	22.6473	21.8512	NaN	NaN
	0.470283	-0.165844	Q96K76-4;Q96K76;Q96K76-2;Q96K76-3	Q96K76-4;Q96K76;Q96K76-2	Ubiquitin carboxyl-terminal hydrolase 47	USP47	Color2 [DarkGray]	1	4					7	7	7	7.7	7.7	7.7	154.7	0	27.078	165190000	60	21.8874	22.525	22.3357	22.2211	22.5817	21.6446	NaN	22.0804	NaN	NaN	NaN	22.6484	NaN	NaN	22.5792	22.4641	23.3543	NaN	22.7211	21.7521	21.9006	22.7052	21.9087	22.2416	22.7723
	0.46971	-0.202917	Q14653;Q14653-4;Q14653-2;Q14653-3;Q14653-5	Q14653;Q14653-4	Interferon regulatory factor 3	IRF3	Color2 [DarkGray]	1	4					11	11	11	40	40	40	47.219	0	260.64	1071700000	189	24.9403	24.3259	24.7248	24.8663	25.0247	24.609	24.3121	24.4833	24.3522	24.9236	23.8412	24.8412	23.9764	23.5616	24.4215	24.3479	22.232	24.6021	24.8929	24.6843	24.7016	25.2559	25.1406	25.2708	24.9442
	0.469653	0.380853	Q01658	Q01658	Protein Dr1	DR1	Color2 [DarkGray]	1	4					3	3	3	29	29	29	19.443	0	10.759	1392000000	62	26.0675	25.5881	25.4806	NaN	25.6362	23.9582	25.8471	24.5999	24.3723	24.9625	25.0659	25.4373	25.2602	23.9554	24.8286	24.5547	24.2063	25.3558	26.0416	24.5417	24.7438	25.2116	25.7214	25.4036	24.8025
	0.468314	0.291252	Q9UI30;Q9UI30-2	Q9UI30;Q9UI30-2	Multifunctional methyltransferase subunit TRM112-like protein	TRMT112	Color2 [DarkGray]	1	4					4	4	4	44	44	44	14.199	0	323.31	1870800000	142	25.1598	25.7068	25.2869	25.9261	26.5741	24.9755	26.1154	25.7044	25.4853	25.7345	25.3659	25.1651	25.1061	25.1901	25.2621	25.5031	24.1739	25.2083	26.4234	25.4834	25.8654	25.0982	25.7632	26.6752	25.6826
	0.468069	-0.557145	P35858;P35858-2	P35858;P35858-2	Insulin-like growth factor-binding protein complex acid labile subunit	IGFALS	Color2 [DarkGray]	1	4					11	11	11	29.3	29.3	29.3	66.034	0	210.91	420090000	63	21.5924	NaN	21.331	20.7878	NaN	22.1109	NaN	NaN	22.7947	22.0854	21.4872	21.6299	22.5665	22.4328	21.6937	25.5046	25.4396	NaN	NaN	22.0465	22.4846	21.4991	NaN	NaN	22.2879
	0.467785	0.579499	P59666;P59665	P59666;P59665	Neutrophil defensin 3;HP 3-56;Neutrophil defensin 2;Neutrophil defensin 1;HP 1-56;Neutrophil defensin 2	DEFA3;DEFA1	Color2 [DarkGray]	1	4					2	2	2	42.6	42.6	42.6	10.245	0	70.69	641080000	34	NaN	21.5233	NaN	NaN	NaN	24.0169	23.4082	NaN	25.6653	24.7078	26.02	24.9241	NaN	23.8503	25.8099	23.8048	24.7427	22.738	NaN	NaN	25.4439	NaN	22.9023	22.303	24.5256
	0.466312	0.193842	O00151	O00151	PDZ and LIM domain protein 1	PDLIM1	Color2 [DarkGray]	1	4					12	12	12	57.4	57.4	57.4	36.071	0	284.21	4625300000	176	25.425	27.2329	27.3475	27.2492	27.6958	27.1376	26.7303	26.4377	26.5372	26.5297	26.493	26.0373	26.3462	26.9018	27.4832	25.7264	27.0636	26.7019	27.4265	26.394	26.9903	27.1382	26.2081	26.8209	26.6529
	0.466302	-0.425885	P13747	P13747	HLA class I histocompatibility antigen, alpha chain E	HLA-E	Color2 [DarkGray]	1	4					5	3	3	19.3	11.7	11.7	40.057	0	323.31	466910000	38	22.3265	NaN	22.3344	22.2986	23.4554	25.185	22.7158	22.4873	24.4906	22.6012	NaN	22.0738	22.347	23.2226	23.4368	22.6732	NaN	25.3365	22.8038	25.1518	NaN	22.7523	22.1267	22.909	21.8882
	0.465819	0.656732	Q86VB7-3;Q86VB7-4;Q86VB7;Q86VB7-2	Q86VB7-3;Q86VB7-4;Q86VB7;Q86VB7-2	Scavenger receptor cysteine-rich type 1 protein M130;Soluble CD163	CD163	Color2 [DarkGray]	1	4					11	11	11	17.4	17.4	17.4	121.61	0	323.31	1430900000	96	22.8898	20.6163	NaN	24.7645	22.758	27.1492	27.7803	26.6409	27.3612	22.9598	25.4309	22.5707	25.4082	26.2127	23.0722	24.1446	23.2832	25.649	NaN	26.6125	24.074	22.8934	NaN	NaN	22.9693
	0.46534	0.144295	Q9HDC9;Q9HDC9-2	Q9HDC9;Q9HDC9-2	Adipocyte plasma membrane-associated protein	APMAP	Color2 [DarkGray]	1	4					8	8	8	25.5	25.5	25.5	46.48	0	184.92	2861300000	185	26.261	25.475	26.1911	26.0498	25.7239	26.0018	26.3564	26.3835	26.7069	25.2008	26.4297	25.8479	25.8075	27.0111	26.1294	25.7226	25.951	25.8789	25.5983	25.8168	26.723	25.716	25.8547	25.8187	25.6949
	0.465299	0.370741	Q9H8H3	Q9H8H3	Methyltransferase-like protein 7A	METTL7A	Color2 [DarkGray]	1	4					3	3	3	17.2	17.2	17.2	28.319	0	323.31	444350000	39	23.1279	NaN	23.7786	21.6519	NaN	23.8962	25.0592	22.5656	22.736	23.2567	23.9971	22.1034	23.4811	25.7355	24.9524	22.7814	22.8166	NaN	21.755	24.0415	23.9028	22.5831	22.8129	NaN	23.4576
	0.464835	-0.250668	O75821	O75821	Eukaryotic translation initiation factor 3 subunit G	EIF3G	Color2 [DarkGray]	1	4					6	6	6	31.9	31.9	31.9	35.611	0	273.66	1585600000	114	24.9546	25.6829	24.4917	25.6931	25.751	21.6312	25.0881	25.2889	25.1276	25.4183	24.6762	25.0307	25.3247	25.3797	25.3635	24.5625	23.7865	25.5547	25.1787	25.525	24.8683	25.6811	25.6615	25.9446	25.084
	0.464654	-0.148124	Q14240;Q14240-2	Q14240;Q14240-2	Eukaryotic initiation factor 4A-II;Eukaryotic initiation factor 4A-II, N-terminally processed	EIF4A2	Color2 [DarkGray]	1	4					14	8	8	56	38.1	38.1	46.402	0	323.31	1881500000	174	25.1928	24.928	24.7302	25.1508	25.4848	24.4611	24.8905	25.2388	24.7597	25.0306	24.8562	25.068	25.3043	24.5295	24.9897	23.9002	24.1393	24.6749	25.9392	25.3668	25.0144	25.0328	25.107	25.2138	25.4342
	0.464624	0.114637	P05023-3;P05023-4;P05023;P05023-2;P13637;P13637-2;P13637-3;P50993;Q13733;P54707;P54707-2	P05023-3;P05023-4;P05023;P05023-2	Sodium/potassium-transporting ATPase subunit alpha-1	ATP1A1	Color2 [DarkGray]	1	4					17	17	16	24.8	24.8	24.1	109.55	0	323.31	5550100000	345	27.4648	26.9298	26.7184	27.2223	27.3688	27.1833	27.0877	27.4836	26.544	27.2028	26.9611	27.3869	26.5829	26.9342	26.9937	26.4362	26.4667	26.943	27.3714	27.501	26.8434	27.0966	27.1577	26.3731	27.134
	0.463918	-0.182856	Q14919;Q14919-2	Q14919;Q14919-2	Dr1-associated corepressor	DRAP1	Color2 [DarkGray]	1	4					2	2	2	10.7	10.7	10.7	22.35	0	39.197	982880000	87	24.3744	25.3155	24.1524	23.7834	24.4296	24.1121	23.9735	24.4068	23.9076	24.3077	24.4493	24.5578	24.2921	23.4633	24.2294	25.1569	25.9225	23.2337	24.0297	24.2646	24.3562	25.3843	24.7176	25.2017	24.3253
	0.463278	-0.223026	P42025	P42025	Beta-centractin	ACTR1B	Color2 [DarkGray]	1	4					7	7	5	42	42	26.3	42.293	0	21.582	533030000	107	23.167	22.9198	22.4113	22.9346	23.4737	23.5935	NaN	22.6854	23.8749	22.7246	22.8482	24.5982	23.4848	23.5081	23.0744	NaN	25.5943	22.7527	23.2568	23.7022	23.68	23.5757	22.3662	23.7167	23.7109
	0.462595	-0.17288	P35606-2;P35606	P35606-2;P35606	Coatomer subunit beta	COPB2	Color2 [DarkGray]	1	4					16	16	16	30.2	30.2	30.2	99.045	0	323.31	2635300000	226	23.8925	25.7221	26.0424	25.0374	26.2929	26.3591	26.0148	25.8662	25.9401	25.9268	25.9048	25.1041	25.9352	26.7922	26.3333	25.4969	26.2188	25.8497	25.6317	26.4794	26.2806	26.1528	25.8817	25.3952	26.1181
	0.46054	-0.0995114	P13639	P13639	Elongation factor 2	EEF2	Color2 [DarkGray]	1	4					31	31	31	52.7	52.7	52.7	95.337	0	323.31	51331000000	1535	29.9107	29.8643	29.8891	30.2059	30.0016	29.7618	29.6231	30.1378	29.47	30.4551	29.6362	30.1402	30.0423	29.7682	30.4379	29.2553	29.6844	29.6198	30.0552	30.498	29.8649	30.1181	30.3385	30.089	29.9513
	0.458903	-0.537621	P23142-4	P23142-4	Fibulin-1	FBLN1	Color2 [DarkGray]	1	4					10	3	3	28.3	8.1	8.1	74.433	0	52.53	606120000	55	NaN	NaN	22.2569	20.3734	NaN	23.0301	21.3696	21.4739	26.1244	24.3054	24.2764	23.7211	23.688	24.54	23.3998	24.5551	25.3407	NaN	21.4385	22.8641	25.6397	22.4151	21.738	NaN	25.154
	0.458579	0.382562	P12236	P12236	ADP/ATP translocase 3;ADP/ATP translocase 3, N-terminally processed	SLC25A6	Color2 [DarkGray]	1	4					9	9	3	34.9	34.9	7.4	32.866	0	68.902	1847200000	203	23.8704	23.2202	25.936	24.3767	24.6268	25.5266	26.1619	25.6998	24.4592	25.9001	26.2353	25.4266	25.158	25.5817	26.9637	24.9935	25.3229	23.2473	NaN	27.0813	25.1979	24.6976	24.1993	24.2043	24.0636
	0.45831	0.139117	P52907	P52907	F-actin-capping protein subunit alpha-1	CAPZA1	Color2 [DarkGray]	1	4					8	7	7	47.6	44.1	44.1	32.922	0	323.31	13824000000	309	29.1045	28.0903	28.449	28.5266	28.1298	27.634	28.2178	28.9961	27.9365	28.4801	28.3052	28.1144	27.9998	27.7313	28.8648	27.5062	27.1215	28.7564	28.6648	27.813	27.858	28.1696	28.2501	28.3504	28.2122
	0.457784	-0.223051	P28161-2;P28161	P28161-2;P28161	Glutathione S-transferase Mu 2	GSTM2	Color2 [DarkGray]	1	4					3	2	2	23	16.2	16.2	22.644	0	156.85	312370000	69	23.3237	21.6758	NaN	22.277	21.4382	22.819	NaN	22.8956	23.1058	22.5101	22.3896	23.7212	24.2628	22.688	23.1899	23.6048	24.1982	NaN	22.5435	22.2322	23.6762	22.998	NaN	23.1179	23.2295
	0.457675	0.228858	P14598;A8MVU1;A6NI72;P14598-2	P14598;A8MVU1;A6NI72;P14598-2	Neutrophil cytosol factor 1;Putative neutrophil cytosol factor 1C;Putative neutrophil cytosol factor 1B	NCF1;NCF1C;NCF1B	Color2 [DarkGray]	1	4					10	10	10	40.3	40.3	40.3	44.681	0	164.61	1278700000	190	24.4522	23.6946	24.727	25.2281	25.0535	26.2013	25.1551	25.0067	25.3376	25.1623	23.0444	24.1793	24.5986	25.8947	25.3127	24.7697	24.1674	24.9321	24.343	25.5689	24.5035	24.3536	23.4679	23.9482	24.555
	0.457461	0.141237	O60499;O60499-2	O60499;O60499-2	Syntaxin-10	STX10	Color2 [DarkGray]	1	4					5	5	5	29.3	29.3	29.3	28.114	0	14.028	95259000	57	20.6301	21.6589	20.9865	21.8248	22.0066	21.265	21.4877	20.6641	21.4654	20.749	21.1375	21.2283	21.0744	21.6436	20.4804	20.4673	21.4627	21.4406	21.7753	21.0028	21.701	21.5856	20.8209	20.856	21.5668
	0.457054	0.784171	Q9HD89	Q9HD89	Resistin	RETN	Color2 [DarkGray]	1	4					3	3	3	31.5	31.5	31.5	11.419	0	323.31	1589400000	40	NaN	23.7739	NaN	25.9965	24.0848	23.6081	23.5412	NaN	27.8663	24.4944	27.4146	27.4747	NaN	NaN	NaN	NaN	25.1911	23.4968	NaN	NaN	24.9964	23.5937	23.89	NaN	26.1082
	0.455933	0.319329	P14678-2;P63162;P14678;P63162-2;P14678-3	P14678-2;P63162;P14678;P63162-2;P14678-3	Small nuclear ribonucleoprotein-associated proteins B and B;Small nuclear ribonucleoprotein-associated protein N	SNRPB;SNRPN	Color2 [DarkGray]	1	4					5	5	5	19	19	19	23.656	0	323.31	5361600000	172	26.3486	27.3221	27.4766	26.9919	27.3314	26.9315	26.4316	26.2772	26.5795	26.6239	25.8845	26.4377	26.5469	25.9287	26.0299	26.258	27.39	25.4929	26.933	25.2509	22.003	25.6136	26.796	27.6653	27.1589
	0.455924	0.202075	Q7L591;Q7L591-3;Q7L591-2;Q7L591-4	Q7L591;Q7L591-3	Docking protein 3	DOK3	Color2 [DarkGray]	1	4					7	7	7	21.6	21.6	21.6	53.288	0	40.325	695310000	96	23.6419	23.9567	24.8022	24.1119	24.2518	24.1865	24.5815	23.4271	23.8742	23.696	22.8325	23.7638	25.4372	23.0532	24.0707	22.8002	24.5119	24.8043	24.7634	24.139	23.681	23.7265	23.4984	23.2194	23.6025
	0.455473	0.233559	P14314-2;P14314	P14314-2;P14314	Glucosidase 2 subunit beta	PRKCSH	Color2 [DarkGray]	1	4					8	8	8	23	23	23	59.177	0	323.31	4186400000	149	26.6079	25.5331	25.7374	26.8417	26.2014	26.202	26.6875	27.1142	27.3923	26.4155	27.0151	26.6824	26.6483	27.7789	26.9497	26.8305	26.0621	26.9404	25.5503	26.2101	26.1299	26.9156	26.5628	23.3741	26.1829
	0.454991	0.244063	P61960;P61960-2	P61960;P61960-2	Ubiquitin-fold modifier 1	UFM1	Color2 [DarkGray]	1	4					3	3	3	58.8	58.8	58.8	9.1175	0	142.21	4238600000	146	26.8808	25.7353	26.6193	27.3685	27.4268	27.2397	26.6613	26.5894	27.1573	26.1714	26.7345	26.0063	27.0723	25.7132	25.4862	26.7234	26.541	26.7471	27.0077	25.861	26.4102	26.7941	26.8464	27.1785	25.8027
	0.454718	-0.114249	P34949;P34949-2	P34949;P34949-2	Mannose-6-phosphate isomerase	MPI	Color2 [DarkGray]	1	4					5	5	5	19.4	19.4	19.4	46.655	0	33.261	215930000	61	NaN	22.0272	21.9545	22.6969	22.5106	22.1391	22.5059	22.1712	22.5345	22.507	21.9308	22.5725	22.0262	21.5607	22.5399	NaN	22.1164	23.0767	22.7047	21.7863	22.1843	NaN	21.9338	22.3812	22.7586
	0.454418	-0.273138	Q9P0J7	Q9P0J7	E3 ubiquitin-protein ligase KCMF1	KCMF1	Color2 [DarkGray]	1	4					2	2	2	8.1	8.1	8.1	41.945	0	323.31	872250000	53	23.2022	25.0557	23.4556	24.8156	24.149	23.6205	23.7685	23.804	22.4686	23.7011	22.9555	26.102	NaN	NaN	23.2175	24.8286	24.8804	23.5042	24.7447	22.7641	24.5082	24.0491	24.3719	NaN	24.1661
	0.454107	-0.180859	O43396	O43396	Thioredoxin-like protein 1	TXNL1	Color2 [DarkGray]	1	4					5	5	5	26.3	26.3	26.3	32.251	0	220.58	1610700000	88	25.5411	24.9626	23.9869	25.1401	24.6461	25.6761	25.3067	25.0815	25.0848	25.1849	24.7829	24.8731	25.4569	23.5529	25.3491	25.0507	26.3895	25.3517	25.0144	24.6852	24.8057	24.9033	26.0403	25.8091	24.6701
	0.452779	-0.245062	P54577	P54577	Tyrosine--tRNA ligase, cytoplasmic;Tyrosine--tRNA ligase, cytoplasmic, N-terminally processed	YARS	Color2 [DarkGray]	1	4					7	7	7	20.5	20.5	20.5	59.143	0	51.038	952700000	108	24.4775	22.0926	24.4261	24.7142	24.9005	24.7752	23.764	24.8287	24.2967	24.6832	24.1933	24.4917	25.1223	23.758	24.9241	24.9091	24.4074	24.2898	NaN	24.6997	21.9086	25.119	24.7138	24.2125	24.5432
	0.45271	-0.39578	Q96C23	Q96C23	Aldose 1-epimerase	GALM	Color2 [DarkGray]	1	4					9	9	9	39.2	39.2	39.2	37.765	0	144.1	3590800000	199	27.6923	26.9814	25.5398	23.2956	26.3144	26.9339	21.8972	28.1863	25.6689	26.9134	25.8614	27.099	26.0558	25.193	24.9798	26.1323	NaN	27.2889	26.1051	25.9712	24.6941	26.4937	26.7667	27.2641	26.8361
	0.451616	0.252423	P56537;P56537-2	P56537;P56537-2	Eukaryotic translation initiation factor 6	EIF6	Color2 [DarkGray]	1	4					7	7	7	51	51	51	26.599	0	239.08	1928700000	115	26.0646	25.0271	25.1562	25.7407	25.9147	25.5316	25.173	25.8521	25.2096	25.3376	25.8149	25.2214	26.0284	24.2381	24.6712	25.2748	26.1233	24.2019	23.5127	24.9756	26.13	24.5715	25.5209	22.7204	26.079
	0.451284	0.140569	P47755;P47755-2	P47755;P47755-2	F-actin-capping protein subunit alpha-2	CAPZA2	Color2 [DarkGray]	1	4					10	10	9	54.2	54.2	50.7	32.949	0	323.31	16247000000	350	29.0896	28.4215	28.4522	28.6818	28.6861	28.4615	28.8616	28.8943	28.4269	28.5602	28.0668	28.69	28.8204	28.5785	28.0447	27.972	27.2254	28.9497	28.7406	28.4881	27.9642	28.5484	28.7479	28.2028	28.7308
	0.450397	0.188883	O14773-2;O14773	O14773-2;O14773	Tripeptidyl-peptidase 1	TPP1	Color2 [DarkGray]	1	4					7	7	7	45.6	45.6	45.6	34.463	0	323.31	22185000000	414	29.7517	28.0879	28.1782	28.7042	29.2069	29.189	29.8297	29.0375	29.828	28.6972	28.9833	28.6935	29.801	28.5773	28.1556	28.7611	28.4536	29.1089	29.2472	28.1914	29.4933	28.7743	29.4056	29.1598	28.6742
	0.450367	0.25845	Q9GZS3	Q9GZS3	WD repeat-containing protein 61;WD repeat-containing protein 61, N-terminally processed	WDR61	Color2 [DarkGray]	1	4					6	6	6	36.7	36.7	36.7	33.58	0	291.12	853560000	157	24.7642	24.4694	24.6892	24.5689	23.3301	24.3722	24.0315	24.6433	23.7461	24.3999	24.3162	24.271	24.1264	24.553	24.3722	22.2484	22.7327	22.3222	24.2379	24.6675	24.9051	24.4298	24.8026	24.7677	24.8284
	0.44837	-0.17698	O95834;O95834-2;O95834-3	O95834;O95834-2;O95834-3	Echinoderm microtubule-associated protein-like 2	EML2	Color2 [DarkGray]	1	4					7	7	7	17.9	17.9	17.9	70.678	0	22.853	1335400000	98	24.7196	24.9893	24.1768	24.503	24.4927	24.481	25.0679	25.3542	24.6266	25.2623	25.2356	25.2723	24.7388	24.5008	25.0812	25.0385	23.9119	25.6784	23.9015	25.1915	24.6495	25.6625	25.3547	24.8719	25.0935
	0.447045	0.181345	P25208	P25208	Nuclear transcription factor Y subunit beta	NFYB	Color2 [DarkGray]	1	4					3	3	3	28.5	28.5	28.5	22.831	0	104.86	298920000	32	22.9586	23.5124	23.3153	23.7919	23.1479	22.7186	23.7995	22.669	22.1499	23.2255	22.6438	22.9878	22.6952	NaN	NaN	22.5972	22.0206	NaN	23.4763	22.5928	22.7818	22.7578	23.0857	23.74	23.3972
	0.446964	-0.207853	Q13405	Q13405	39S ribosomal protein L49, mitochondrial	MRPL49	Color2 [DarkGray]	1	4					3	3	3	23.5	23.5	23.5	19.198	0	323.31	859480000	82	24.7914	24.1892	24.8226	23.77	24.4174	23.7808	24.0372	24.3071	23.3982	23.8633	23.8445	23.5752	23.9829	24.1693	23.9821	25.6215	26.4696	24.5337	25.1111	23.5648	23.7002	24.0129	24.1159	24.6915	23.9581
	0.446664	-0.105227	P35998;P35998-2	P35998;P35998-2	26S protease regulatory subunit 7	PSMC2	Color2 [DarkGray]	1	4					15	15	15	46.2	46.2	46.2	48.633	0	123.43	2732500000	314	26.2978	26.0879	26.145	25.8196	26.6199	26.0803	25.5694	25.6707	25.2364	26.0313	25.2922	26.2139	25.5918	25.4645	25.7726	25.3064	26.0551	25.8299	25.995	25.9219	26.1024	25.7154	25.963	25.7657	25.9945
	0.446513	0.141141	Q9BTD8-4;Q9BTD8-2;Q9BTD8-3;Q9BTD8	Q9BTD8-4;Q9BTD8-2;Q9BTD8-3;Q9BTD8	RNA-binding protein 42	RBM42	Color2 [DarkGray]	1	4					5	5	5	23.3	23.3	23.3	47.025	0	68.801	514850000	116	23.6843	24.6618	23.7568	23.9429	24.7989	23.5121	23.2683	23.3439	23.1907	23.5359	23.1479	23.4717	23.4893	22.9172	23.8898	22.7687	23.1493	23.4569	24.0514	23.492	22.9981	23.3537	23.4826	24.1065	23.7977
	0.446361	0.249766	Q13630	Q13630	GDP-L-fucose synthase	TSTA3	Color2 [DarkGray]	1	4					6	6	6	24.9	24.9	24.9	35.892	0	155.39	2743500000	137	26.4334	26.1875	26.0421	26.4535	26.0372	25.7856	25.948	26.2665	25.5778	25.8087	25.1372	26.1625	25.7138	25.9266	25.9924	24.1479	24.1851	26.5048	26.7132	25.1822	24.0456	26.8056	26.5793	26.1959	26.0944
	0.445839	-0.278263	P41240;P42679-3;P42679;P42679-2	P41240	Tyrosine-protein kinase CSK	CSK	Color2 [DarkGray]	1	4					16	16	16	48.9	48.9	48.9	50.704	0	323.31	3024500000	247	25.8033	26.4338	27.1785	25.9099	24.9611	24.5456	24.9735	26.134	24.0561	26.6795	24.6466	26.1426	26.104	24.9812	26.9588	24.8188	25.0528	26.0617	26.6058	26.7742	25.6795	26.144	26.5695	25.9897	26.5703
	0.445808	-0.327448	Q9Y2Y0-2;Q9Y2Y0	Q9Y2Y0-2;Q9Y2Y0	ADP-ribosylation factor-like protein 2-binding protein	ARL2BP	Color2 [DarkGray]	1	4					3	3	3	26.3	26.3	26.3	17.711	0	7.2319	273700000	37	24.4774	23.2399	22.3729	NaN	22.7804	22.5875	22.7515	23.8036	NaN	22.8991	NaN	22.298	NaN	NaN	22.2016	23.1683	NaN	23.886	23.9396	22.817	NaN	NaN	24.0799	NaN	23.6362
	0.44482	0.205878	O14617-4;O14617;O14617-5;O14617-2;O14617-3	O14617-4;O14617;O14617-5;O14617-2;O14617-3	AP-3 complex subunit delta-1	AP3D1	Color2 [DarkGray]	1	4					9	9	9	16.5	16.5	16.5	114.71	0	43.414	320720000	28	NaN	NaN	23.343	NaN	NaN	23.872	23.7648	23.6392	23.1465	23.3112	23.5631	23.4963	23.0685	NaN	23.8595	22.5217	22.5529	22.0953	NaN	23.89	23.777	NaN	NaN	NaN	NaN
	0.444728	-0.256957	Q9UBF2;Q9UBF2-2	Q9UBF2;Q9UBF2-2	Coatomer subunit gamma-2	COPG2	Color2 [DarkGray]	1	4					9	8	8	14.9	13.5	13.5	97.621	0	15.579	225250000	46	22.3571	22.7563	21.8681	21.6449	21.7597	22.1265	NaN	21.7357	NaN	22.309	21.4883	22.5695	22.4436	22.95	24.1432	21.6159	21.1214	22.9166	NaN	22.9229	NaN	NaN	22.8724	NaN	22.5335
	0.443445	-0.155422	Q04206-3;Q04206;Q04206-2;Q04206-4	Q04206-3;Q04206;Q04206-2;Q04206-4	Transcription factor p65	RELA	Color2 [DarkGray]	1	4					5	5	5	16.3	16.3	16.3	59.067	0	55.977	3036600000	159	26.3954	26.0886	25.8165	25.9604	25.9258	25.5731	26.0454	25.7606	25.598	25.9732	25.3382	25.9864	25.7752	25.2622	26.1747	25.1275	24.9789	26.7071	26.4849	26.0489	25.395	26.0548	26.4894	26.2403	26.0196
	0.4432	0.148696	O75995	O75995	SAM and SH3 domain-containing protein 3	SASH3	Color2 [DarkGray]	1	4					6	6	6	43.4	43.4	43.4	41.595	0	37.021	618340000	80	24.054	23.8628	23.2164	23.316	24.1591	23.297	24.0138	23.8944	23.893	24.821	23.5706	24.0202	23.9824	NaN	22.9284	23.4983	23.8792	24.1156	23.6525	23.0357	24.3305	23.9334	23.9741	23.5702	23.4473
	0.442313	0.150277	Q05086-2;Q05086-3;Q05086	Q05086-2;Q05086-3;Q05086	Ubiquitin-protein ligase E3A	UBE3A	Color2 [DarkGray]	1	4					5	5	5	8.1	8.1	8.1	97.967	0	33.501	196390000	49	22.3045	NaN	22.0992	23.4848	22.3254	22.6432	22.9041	22.2544	22.1903	22.4587	22.0229	22.0509	22.1276	23.1718	23.1096	22.0985	NaN	22.7296	21.7084	22.8426	22.365	22.3005	NaN	21.7094	23.0987
	0.441526	0.214019	Q02818	Q02818	Nucleobindin-1	NUCB1	Color2 [DarkGray]	1	4					8	8	8	26.9	26.9	26.9	53.879	0	107.03	2100000000	187	24.9907	26.1265	24.9443	25.1708	25.2833	25.0676	25.8387	25.8193	26.1399	24.2996	26.0851	25.4264	25.7797	26.1621	24.5766	26.6294	26.1933	25.9219	25.6241	25.3942	25.9758	25.4382	24.0507	23.7473	25.2597
	0.441041	-0.263981	Q00688	Q00688	Peptidyl-prolyl cis-trans isomerase FKBP3	FKBP3	Color2 [DarkGray]	1	4					5	5	5	24.6	24.6	24.6	25.177	0	32.504	921600000	76	24.5463	24.0388	24.0564	25.0506	21.9405	21.7666	24.8209	25.0564	24.1129	24.5618	24.6688	24.4292	24.4411	24.3531	25.2763	22.5462	23.699	24.6778	23.1451	24.2661	24.5322	24.5631	25.2769	25.0948	24.8554
	0.44103	0.308116	P53597	P53597	Succinyl-CoA ligase [ADP/GDP-forming] subunit alpha, mitochondrial	SUCLG1	Color2 [DarkGray]	1	4					4	4	4	24.3	24.3	24.3	36.249	0	7.9176	494890000	34	22.5026	22.2245	23.4798	22.8649	NaN	25.7264	23.9213	23.8679	NaN	24.0207	23.7279	23.808	24.3351	23.7932	24.5196	22.8477	NaN	NaN	21.4732	24.0573	23.3077	23.5017	22.7169	22.3779	NaN
	0.440681	0.182555	P82979	P82979	SAP domain-containing ribonucleoprotein	SARNP	Color2 [DarkGray]	1	4					3	3	3	18.6	18.6	18.6	23.671	0	323.31	3406400000	82	26.2986	26.2869	26.5171	26.7307	26.5156	26.5398	26.6524	26.3703	25.8058	26.6022	25.1202	26.1352	26.105	25.9513	27.2213	25.8073	25.5006	26.3522	26.1817	25.2618	25.744	27.0423	26.7532	27.063	26.0146
	0.440048	-0.153773	Q9BTE6;Q9BTE6-2;Q9BTE6-3	Q9BTE6;Q9BTE6-2;Q9BTE6-3	Alanyl-tRNA editing protein Aarsd1	AARSD1	Color2 [DarkGray]	1	4					3	3	3	10.9	10.9	10.9	45.479	0	10.277	191850000	37	21.7542	22.0917	23.3277	23.0125	22.5743	21.4853	22.3081	21.8917	NaN	23.3609	NaN	22.3163	22.6683	22.1255	22.3822	22.178	22.2719	22.6018	22.619	22.2464	22.7724	22.8719	22.0564	NaN	22.7888
	0.439479	0.255331	O00154-4;O00154-6;O00154-5;O00154-7;O00154;O00154-2;O00154-3	O00154-4;O00154-6;O00154-5;O00154-7;O00154;O00154-2;O00154-3	Cytosolic acyl coenzyme A thioester hydrolase	ACOT7	Color2 [DarkGray]	1	4					9	9	9	37.6	37.6	37.6	37.419	0	323.31	1640400000	218	26.3235	25.2935	25.3423	26.1155	26.2359	25.565	25.224	25.4256	24.6582	25.0228	25.1322	24.7037	24.606	24.4174	24.2485	24.3001	22.3387	26.6132	25.3319	25.738	24.5835	25.1288	25.7316	25.8919	24.846
	0.43867	-0.150643	P50914	P50914	60S ribosomal protein L14	RPL14	Color2 [DarkGray]	1	4					2	2	2	10.2	10.2	10.2	23.432	0	30.74	2513000000	112	24.8194	25.4642	26.5009	26.295	25.9551	26.2274	25.7604	25.704	25.2133	25.8204	25.3727	25.5705	25.9083	25.4967	26.4552	25.9266	25.2807	25.5927	26.1898	26.148	25.6938	26.6155	25.5318	26.2894	26.0126
	0.438396	0.27904	P04217;P04217-2;CON__Q2KJF1	P04217;P04217-2	Alpha-1B-glycoprotein	A1BG	Color2 [DarkGray]	1	4					11	11	11	32.3	32.3	32.3	54.253	0	323.31	5983900000	231	26.7991	27.2333	26.3897	27.897	26.5096	26.895	26.37	26.2536	28.7204	26.388	27.7251	27.0905	27.2454	26.8711	26.1084	28.2768	28.2012	25.2231	26.0365	25.4808	27.805	25.7084	26.3616	25.3205	26.6442
	0.43831	-0.236512	P53618	P53618	Coatomer subunit beta	COPB1	Color2 [DarkGray]	1	4					24	24	24	41.4	41.4	41.4	107.14	0	323.31	3034500000	254	23.7273	25.4687	25.5107	24.8038	25.9042	26.2723	25.8405	25.1129	25.6754	26.064	25.9506	26.0946	25.502	26.0132	25.9184	25.9682	25.9774	25.1785	24.7755	26.5774	26.5599	26.0385	25.442	23.6218	25.8491
	0.438235	-0.149736	O60826	O60826	Coiled-coil domain-containing protein 22	CCDC22	Color2 [DarkGray]	1	4					9	9	9	22	22	22	70.755	0	145.5	328880000	125	21.5538	21.8061	23.7602	22.3777	23.5238	22.8891	23.2601	23.1217	22.6193	23.137	23.4157	23.1846	22.8278	22.9281	23.3855	23.2349	NaN	22.4138	23.3198	23.3381	23.5869	23.0496	22.7446	22.6164	23.2
	0.438162	-0.217631	P13797;P13797-3;P13797-2	P13797;P13797-3;P13797-2	Plastin-3	PLS3	Color2 [DarkGray]	1	4					21	15	14	47.6	40.3	38.1	70.81	0	323.31	5117000000	240	26.0504	26.4457	25.7642	25.8972	25.7327	26.0451	25.4188	26.0922	26.9276	26.8865	26.4569	26.1358	26.397	25.3195	25.7756	27.0626	27.5213	25.8136	25.742	24.9724	27.2262	25.9884	25.245	25.7593	25.2541
	0.437467	0.424089	P00450	P00450	Ceruloplasmin	CP	Color2 [DarkGray]	1	4					19	19	17	28.7	28.7	26.8	122.2	0	323.31	10638000000	473	26.8112	26.0118	26.6031	27.0035	26.2002	26.8029	27.2747	26.7958	29.2484	27.2838	28.6756	27.5161	28.2691	28.1157	27.511	28.8555	28.2525	25.8278	24.6623	26.4802	27.534	25.5446	26.5956	25.3447	26.4776
	0.437399	0.169602	P63208-2;P63208	P63208-2;P63208	S-phase kinase-associated protein 1	SKP1	Color2 [DarkGray]	1	4					5	5	5	48.8	48.8	48.8	18.063	0	323.31	1809000000	102	26.6102	25.1168	25.4937	25.2525	24.5082	25.8838	24.9792	25.9955	25.9377	25.7649	25.69	25.0739	25.5707	25.4304	26.018	24.4183	23.6477	25.2585	25.1775	25.0939	25.3149	25.6625	25.8568	25.4389	25.3589
	0.436788	-0.313324	Q86VS8	Q86VS8	Protein Hook homolog 3	HOOK3	Color2 [DarkGray]	1	4					6	6	6	10.4	10.4	10.4	83.125	0	72.928	202540000	39	23.2032	NaN	21.7162	NaN	22.7878	21.6197	NaN	21.648	NaN	22.4908	22.4705	22.4624	NaN	21.5286	22.1563	24.6434	24.4953	22.3084	NaN	21.9247	22.282	22.0977	NaN	NaN	22.7348
	0.436636	-0.199044	Q9H3P7	Q9H3P7	Golgi resident protein GCP60	ACBD3	Color2 [DarkGray]	1	4					5	5	5	17	17	17	60.593	0	20.238	309000000	38	22.674	24.0923	23.4035	NaN	NaN	22.9988	23.63	23.6534	23.412	NaN	22.7188	NaN	22.8659	23.7774	22.5804	22.0775	24.3473	NaN	NaN	23.5407	NaN	23.737	22.8831	NaN	23.4307
	0.436508	0.232101	Q9Y3C0	Q9Y3C0	WASH complex subunit CCDC53	CCDC53	Color2 [DarkGray]	1	4					3	3	3	26.3	26.3	26.3	21.172	0	83.657	428240000	50	22.7967	25.1321	23.337	23.67	23.7801	24.0293	23.539	23.2378	23.295	22.6333	23.1969	22.9635	23.5582	22.6778	20.7497	23.684	22.1623	23.9938	23.8207	22.6254	23.0834	22.907	23.3934	23.298	23.1991
	0.435904	0.375296	P14222	P14222	Perforin-1	PRF1	Color2 [DarkGray]	1	4					6	6	6	15.9	15.9	15.9	61.377	0	50.04	224790000	49	22.6014	NaN	24.5739	23.8766	NaN	23.1026	23.3224	23.7147	21.2818	21.8762	22.4494	21.4513	24.4655	21.4759	NaN	NaN	NaN	22.4277	21.7637	24.607	22.6943	21.4709	22.0448	22.9028	NaN
	0.434933	0.123791	O95336	O95336	6-phosphogluconolactonase	PGLS	Color2 [DarkGray]	1	4					12	12	12	78.7	78.7	78.7	27.547	0	323.31	17029000000	489	28.9754	28.9197	28.3594	28.6649	28.6206	28.5978	28.9181	28.4387	28.8681	28.5534	28.6135	28.513	29.0695	28.4627	28.0393	28.4553	28.5368	29.2674	29.0773	28.0808	29.0986	28.8565	28.6345	28.7918	28.177
	0.434926	0.132631	Q9NUQ9;Q9NUQ9-2	Q9NUQ9;Q9NUQ9-2	Protein FAM49B	FAM49B	Color2 [DarkGray]	1	4					14	14	12	62.3	62.3	55.6	36.748	0	323.31	14159000000	473	28.5469	28.2818	28.3244	28.1236	28.1864	28.3277	28.0642	28.5646	27.9353	28.3874	27.7729	28.5283	28.9853	27.8339	28.2365	27.5272	27.2257	28.9816	28.5901	28.1502	27.4473	28.4071	28.3444	28.3902	28.4956
	0.43471	0.431937	Q8WW52;Q8WW52-2	Q8WW52;Q8WW52-2	Protein FAM151A	FAM151A	Color2 [DarkGray]	1	4					4	4	4	16.9	16.9	16.9	64.027	0	125.92	578100000	40	24.4906	26.2605	NaN	22.3707	23.8281	25.0056	NaN	23.2785	NaN	24.7336	21.8014	22.9808	NaN	NaN	24.0245	NaN	21.1474	22.6667	24.4511	22.8361	25.0359	23.9317	21.7825	23.5915	22.8704
	0.434442	0.198256	Q9P016;Q9P016-2	Q9P016	Thymocyte nuclear protein 1	THYN1	Color2 [DarkGray]	1	4					3	3	3	16.9	16.9	16.9	25.697	0	76.749	694060000	40	23.6373	24.7244	24.3546	24.335	23.6404	23.7043	NaN	NaN	22.7949	23.878	23.6043	25.5349	23.9585	24.2025	25.1157	24.2799	23.5267	23.3259	23.7499	23.6999	24.295	24.8906	23.9593	NaN	24.5814
	0.434313	0.287244	Q9Y2E5-2;Q9Y2E5	Q9Y2E5-2;Q9Y2E5	Epididymis-specific alpha-mannosidase	MAN2B2	Color2 [DarkGray]	1	4					4	4	4	7.2	7.2	7.2	107.7	0	38.775	173720000	29	23.1214	22.8961	NaN	23.4161	21.5928	21.8838	23.6806	21.952	23.844	21.5692	NaN	NaN	NaN	23.3307	NaN	21.6327	NaN	22.911	22.3668	NaN	23.9686	NaN	NaN	22.5274	NaN
	0.434174	0.201401	Q9UKM9;Q9UKM9-2	Q9UKM9;Q9UKM9-2	RNA-binding protein Raly	RALY	Color2 [DarkGray]	1	4					4	4	4	14.4	14.4	14.4	32.463	0	42.092	1818600000	68	25.2321	25.4808	26.8932	26.2378	25.4663	25.3608	25.7431	25.469	24.1396	25.2987	24.3559	25.0242	25.5049	24.899	26.4962	24.2635	24.3574	25.4087	25.7244	25.8338	24.5584	25.2412	25.881	26.0198	25.5058
	0.434089	-0.27522	O00422-2;O00422	O00422-2;O00422	Histone deacetylase complex subunit SAP18	SAP18	Color2 [DarkGray]	1	4					2	2	2	16.3	16.3	16.3	19.526	0	6.3126	403350000	42	23.6342	24.7268	23.7086	21.0782	22.8047	22.9783	NaN	NaN	22.6322	23.5314	23.1286	23.6665	NaN	22.0493	22.4974	NaN	24.7003	NaN	23.5923	23.6054	22.3984	22.5372	23.3133	24.1096	23.9176
	0.434066	-0.203318	Q9H4Z3	Q9H4Z3	Phosphorylated CTD-interacting factor 1	PCIF1	Color2 [DarkGray]	1	4					2	2	2	5	5	5	80.669	0	24.72	221250000	24	21.6297	23.3889	23.1989	21.9998	NaN	22.7063	22.2353	NaN	NaN	23.2711	21.7754	22.5014	22.082	NaN	23.2902	22.1648	22.3419	NaN	NaN	23.4274	22.8331	22.8877	NaN	NaN	22.9779
	0.434004	0.204566	O60925	O60925	Prefoldin subunit 1	PFDN1	Color2 [DarkGray]	1	4					3	3	3	17.2	17.2	17.2	14.21	0	8.2689	1015900000	55	26.2509	25.2613	24.324	25.4189	25.3462	24.0207	24.9318	24.8865	NaN	24.9709	24.1206	24.6146	24.5638	NaN	24.3731	23.8482	23.689	25.6979	24.9717	23.7176	24.2086	24.9568	25.1934	25.2527	24.2918
	0.433647	0.193333	Q96I99;Q96I99-2	Q96I99;Q96I99-2	Succinyl-CoA ligase [GDP-forming] subunit beta, mitochondrial	SUCLG2	Color2 [DarkGray]	1	4					9	9	9	27.8	27.8	27.8	46.51	0	323.31	1124000000	131	23.6669	23.9977	25.4193	24.1021	24.2001	24.4338	25.0398	24.8885	24.4756	24.6734	25.1075	24.1189	25.5588	25.1435	25.7973	24.6317	24.9729	24.7405	24.2279	25.4284	24.2335	25.0793	23.9983	24.7395	23.9893
	0.433604	-0.385456	P42785;P42785-2	P42785;P42785-2	Lysosomal Pro-X carboxypeptidase	PRCP	Color2 [DarkGray]	1	4					4	4	4	13.3	13.3	13.3	55.799	0	6.1731	6371600000	40	26.9104	27.0403	26.0232	27.7259	27.0933	27.4999	26.3813	NaN	27.2294	NaN	25.6973	26.1328	25.8598	26.0863	27.5719	30.1477	28.2138	NaN	NaN	NaN	NaN	26.6655	26.5663	27.11	27.4425
	0.432054	0.208816	P0DMN0;P0DMM9;P0DMM9-3;P0DMM9-2	P0DMN0;P0DMM9;P0DMM9-3;P0DMM9-2	Sulfotransferase 1A4;Sulfotransferase 1A3	SULT1A4;SULT1A3	Color2 [DarkGray]	1	4					6	6	3	35.6	35.6	20.7	34.196	0	65.677	1112000000	129	24.9638	24.548	24.8019	25.5111	25.1598	25.4509	25.2372	23.5308	25.0798	23.6961	24.3813	23.552	24.7233	25.1167	24.6169	24.43	23.8362	24.511	23.7519	23.1008	25.4608	24.9499	24.2846	24.1413	24.5707
	0.432018	0.211279	Q8IWT0-2;Q8IWT0	Q8IWT0-2;Q8IWT0	Protein archease	ZBTB8OS	Color2 [DarkGray]	1	4					2	2	2	19.9	19.9	19.9	15.709	0	51.289	261050000	55	22.939	22.5138	22.712	23.5506	22.705	23.0422	23.0192	22.1845	22.6832	22.4647	22.4608	22.5937	22.2603	22.3777	NaN	22.4784	NaN	23.7313	23.6087	21.6587	22.7779	23.0905	22.5424	23.1327	22.68
	0.43192	-0.0880416	P12081-4;P12081;P12081-3;P12081-2	P12081-4;P12081;P12081-3;P12081-2	Histidine--tRNA ligase, cytoplasmic	HARS	Color2 [DarkGray]	1	4					16	16	12	46.6	46.6	38.7	54.846	0	323.31	3847800000	315	26.729	26.5354	26.6377	26.3465	26.259	26.6501	26.2051	26.7943	25.8766	26.7466	26.0415	26.4454	26.8157	26.3318	26.6812	25.8605	26.2348	26.4856	26.6786	26.7753	25.8334	26.6843	26.7727	26.4846	26.633
	0.431368	0.305807	Q0VD83;Q0VD83-3;Q0VD83-2	Q0VD83;Q0VD83-3	Apolipoprotein B receptor	APOBR	Color2 [DarkGray]	1	4					10	10	10	18	18	18	115.63	0	323.31	1273500000	169	25.156	23.7733	23.141	26.2409	25.7467	24.7858	25.164	24.25	26.6424	24.1202	25.5218	24.5176	24.797	26.1776	24.4087	25.4634	23.8511	24.7247	NaN	24.9911	25.4874	22.8086	24.17	25.3945	24.713
	0.431063	-0.236448	O15372	O15372	Eukaryotic translation initiation factor 3 subunit H	EIF3H	Color2 [DarkGray]	1	4					4	4	4	22.2	22.2	22.2	39.93	0	14.462	138740000	60	22.1909	21.9212	21.2161	21.972	NaN	21.0372	NaN	21.7749	21.4551	21.8142	22.1511	21.6167	NaN	NaN	22.4389	NaN	23.0085	22.1814	23.3033	22.7982	19.8117	21.6623	NaN	21.7685	22.6097
	0.430756	-0.215304	Q13057;Q13057-2	Q13057;Q13057-2	Bifunctional coenzyme A synthase;Phosphopantetheine adenylyltransferase;Dephospho-CoA kinase	COASY	Color2 [DarkGray]	1	4					6	6	6	11.7	11.7	11.7	62.328	0	57.367	565740000	76	22.1574	25.128	23.8018	20.9555	23.9706	23.8568	22.9177	23.2369	23.3284	23.418	22.8184	23.9428	23.6315	23.0948	24.2574	24.1069	24.6951	23.716	23.6465	23.6288	23.5221	23.877	22.9277	23.4293	23.7908
	0.430083	-0.258072	O75427	O75427	Leucine-rich repeat and calponin homology domain-containing protein 4	LRCH4	Color2 [DarkGray]	1	4					8	8	8	22.8	22.8	22.8	73.449	0	185.99	872900000	72	24.7016	23.452	24.5487	24.2119	25.4113	23.0193	NaN	NaN	23.6286	24.2356	22.7101	24.881	24.5473	23.8978	24.4413	23.9894	24.743	24.7269	25.167	23.8927	23.8038	23.0701	24.4825	24.8841	25.4735
	0.430034	-0.126868	O43747;O43747-2	O43747;O43747-2	AP-1 complex subunit gamma-1	AP1G1	Color2 [DarkGray]	1	4					9	9	9	18.5	18.5	18.5	91.35	0	26.819	317740000	78	23.3099	22.9686	23.8846	22.3337	23.0369	23.1275	22.3587	22.7782	23.0142	22.8994	22.877	23.1329	22.5505	22.3436	22.8284	23.2956	22.7977	23.182	23.3155	23.8016	NaN	22.595	23.202	23.2572	22.4898
	0.429867	0.234039	P62263	P62263	40S ribosomal protein S14	RPS14	Color2 [DarkGray]	1	4					6	6	6	57	57	57	16.273	0	191.99	15229000000	188	28.7249	28.8879	28.5128	29.533	28.9736	28.6421	28.413	29.3067	27.7069	28.5099	27.6663	28.1667	28.4808	26.0377	28.6287	27.5374	27.3882	28.5213	29.3128	28.2694	27.6284	28.469	28.7675	29.7366	27.3027
	0.429794	-0.111991	P61247	P61247	40S ribosomal protein S3a	RPS3A	Color2 [DarkGray]	1	4					7	7	7	27.7	27.7	27.7	29.945	0	323.31	5465600000	366	26.3442	27.2759	27.0093	26.901	26.8471	26.4455	26.3984	27.1302	26.17	26.9724	26.3067	26.7079	26.6462	26.5972	27.2232	26.3351	26.1049	26.4864	26.743	27.5322	26.5134	27.066	26.9915	27.1951	26.5178
	0.429171	-0.295974	Q86WV1;Q86WV1-2	Q86WV1;Q86WV1-2	Src kinase-associated phosphoprotein 1	SKAP1	Color2 [DarkGray]	1	4					4	4	4	17.5	17.5	17.5	41.432	0	323.31	847030000	109	24.5865	24.7055	23.2613	23.903	24.7906	22.9826	22.9848	24.1596	NaN	24.3425	24.2315	25.2824	23.3572	21.5298	23.8615	24.1834	23.0579	23.8576	23.8185	23.2153	24.0039	25.2757	24.0663	24.3627	24.9779
	0.429111	0.198063	O95544-3;O95544;O95544-2	O95544-3;O95544;O95544-2	NAD kinase	NADK	Color2 [DarkGray]	1	4					3	3	3	12.3	12.3	12.3	46.446	0	35.946	103290000	24	22.0956	NaN	NaN	NaN	NaN	22.293	21.8564	23.0521	22.0877	21.9238	21.7883	21.8091	21.595	NaN	21.6108	NaN	NaN	21.2811	21.6515	22.0597	NaN	NaN	22.3057	22.3703	NaN
	0.428908	-0.322876	P08397-2;P08397;P08397-4;P08397-3	P08397-2;P08397;P08397-4;P08397-3	Porphobilinogen deaminase	HMBS	Color2 [DarkGray]	1	4					2	2	2	11.9	11.9	11.9	37.699	0	47.404	76426000	37	20.7156	NaN	20.758	19.1447	20.4689	NaN	NaN	19.7641	21.5008	20.1336	20.2993	19.8829	20.1314	20.3104	NaN	20.1852	23.1266	20.1995	NaN	20.2728	23.1084	20.679	20.5164	20.1784	20.2188
	0.428614	0.160749	Q14103-3;Q14103;Q14103-4;Q14103-2	Q14103-3;Q14103;Q14103-4;Q14103-2	Heterogeneous nuclear ribonucleoprotein D0	HNRNPD	Color2 [DarkGray]	1	4					7	6	6	26.1	23.5	23.5	32.834	0	301.85	9657300000	320	28	27.4716	28.35	28.1262	27.1307	27.394	27.4006	27.9423	26.9927	27.9797	27.0218	27.6664	27.1167	27.1362	28.6153	27.0751	26.7617	26.8736	27.379	28.3096	26.9859	27.4502	27.9535	27.654	27.4184
	0.428577	0.151557	Q9H0E2;Q9H0E2-2	Q9H0E2;Q9H0E2-2	Toll-interacting protein	TOLLIP	Color2 [DarkGray]	1	4					6	6	6	36.5	36.5	36.5	30.281	0	196.18	1296400000	154	25.4406	25.7449	25.4178	23.4777	25.3444	25.4146	25.1702	24.5795	24.9379	24.9326	24.8088	24.9945	25.3443	24.5413	24.1212	24.2849	24.87	25.3067	25.4496	24.2521	24.9784	25.0346	24.5837	25.1642	24.7923
	0.428021	-0.284879	Q96SB3;Q9ULJ8;Q9ULJ8-4;Q9ULJ8-5;Q9ULJ8-3	Q96SB3	Neurabin-2	PPP1R9B	Color2 [DarkGray]	1	4					4	4	4	8.7	8.7	8.7	89.333	0	72.959	349550000	40	21.8016	NaN	23.5739	NaN	24.0943	NaN	NaN	22.8495	22.5287	22.9578	22.8195	22.5241	22.5425	NaN	23.1317	NaN	25.2411	23.4786	24.0692	22.9835	22.0149	22.913	22.921	23.3187	24.0511
	0.427587	-0.256204	Q15438-2;Q15438;Q15438-3;Q99418-2;O43739-2;Q99418;O43739	Q15438-2;Q15438;Q15438-3	Cytohesin-1	CYTH1	Color2 [DarkGray]	1	4					5	5	4	14.9	14.9	13.1	46.355	0	21.705	149950000	32	22.5921	NaN	21.2878	23.0276	22.0709	NaN	22.9489	22.1861	21.8837	22.3072	21.2029	22.4074	22.6942	NaN	NaN	NaN	NaN	NaN	22.4249	22.7719	20.7827	23.098	21.9412	22.8245	22.9825
	0.42742	-0.16978	Q16181;Q16181-2;Q6ZU15	Q16181;Q16181-2	Septin-7	SEPT7	Color2 [DarkGray]	1	4					8	7	7	34.1	30.4	30.4	50.679	0	323.31	3051300000	202	25.6981	25.2033	26.5065	25.742	25.2955	25.5631	25.4257	26.4933	25.1563	26.5221	25.5415	26.1954	25.7133	25.5574	27.2571	NaN	25.1174	25.3593	26.3428	26.3321	25.7261	26.0675	26.2352	26.6344	26.1387
	0.427245	-0.33279	Q9NVI7-2;Q9NVI7;Q9NVI7-3;Q5T2N8;Q5T9A4-2	Q9NVI7-2;Q9NVI7;Q9NVI7-3;Q5T2N8	ATPase family AAA domain-containing protein 3A;ATPase family AAA domain-containing protein 3C	ATAD3A;ATAD3C	Color2 [DarkGray]	1	4					6	6	4	12.1	12.1	8.9	66.217	0	105.2	524220000	81	NaN	NaN	24.3153	21.8461	NaN	24.5314	23.2737	23.2428	NaN	22.9223	23.1154	23.7926	23.6013	24.0795	24.0065	24.1127	25.3996	NaN	NaN	24.4986	24.5905	23.5062	NaN	NaN	22.1924
	0.427197	0.155022	Q16740	Q16740	ATP-dependent Clp protease proteolytic subunit, mitochondrial	CLPP	Color2 [DarkGray]	1	4					5	5	5	27.4	27.4	27.4	30.18	0	83.323	957000000	99	25.1116	24.2796	24.512	24.9756	24.4618	24.9941	24.7109	24.7032	23.8199	23.5924	24.215	24.3781	24.9777	23.5774	23.8052	23.8645	NaN	25.1066	24.5976	23.5648	23.9971	24.5485	23.6371	24.1381	23.5301
	0.426771	0.273049	Q6NUK1;Q6NUK1-2	Q6NUK1;Q6NUK1-2	Calcium-binding mitochondrial carrier protein SCaMC-1	SLC25A24	Color2 [DarkGray]	1	4					4	4	4	13	13	13	53.354	0	248.28	995650000	48	24.3042	22.7435	25.2732	23.6457	23.0147	25.4377	25.4265	25.3364	24.7103	24.4385	24.9708	24.394	24.6567	25.3344	25.6283	25.0634	24.4526	22.7853	23.1745	25.6623	23.638	NaN	24.691	24.5473	23.0062
	0.426007	-0.176288	Q9ULA0	Q9ULA0	Aspartyl aminopeptidase	DNPEP	Color2 [DarkGray]	1	4					15	15	15	54.1	54.1	54.1	52.428	0	230.94	6076700000	277	27.5831	27.1451	26.8477	27.0913	27.4079	27.1471	27.4955	27.369	26.4311	27.1387	26.4999	27.1571	27.2365	25.039	26.8747	27.4371	27.4456	27.5308	26.8241	27.2628	27.3863	27.4348	27.0796	27.6676	27.472
	0.424714	0.187819	Q9UFG5;Q9UFG5-2	Q9UFG5;Q9UFG5-2	UPF0449 protein C19orf25	C19orf25	Color2 [DarkGray]	1	4					3	3	3	50	50	50	12.878	0	65.913	941160000	83	24.4536	24.5219	24.6421	24.4357	24.7959	24.0801	24.7336	23.899	23.9781	23.6269	24.1978	23.4907	24.2373	23.6279	23.5204	24.0383	25.5226	23.6231	25.1313	23.2509	24.5647	24.1388	24.0367	24.9129	23.2946
	0.424089	0.152322	P08195-3;P08195;P08195-4;P08195-2	P08195-3;P08195;P08195-4;P08195-2	4F2 cell-surface antigen heavy chain	SLC3A2	Color2 [DarkGray]	1	4					12	12	12	34.3	34.3	34.3	61.815	0	107.18	2241900000	192	25.5386	26.5445	25.1687	26.0374	26.2825	26.0336	25.8658	25.4381	26.2866	25.6473	25.6933	25.6702	25.9486	26.0885	24.6082	26.107	25.9675	26.0126	25.3107	25.5443	25.2964	25.7285	25.665	25.3303	25.5128
	0.423994	0.277788	P16435	P16435	NADPH--cytochrome P450 reductase	POR	Color2 [DarkGray]	1	4					8	8	8	21.7	21.7	21.7	76.689	0	93.544	449830000	81	21.9733	23.4179	22.5644	NaN	22.5491	24.7649	24.9392	23.277	23.8194	22.8055	23.4648	23.1128	24.5118	22.469	23.1995	24.1286	23.016	22.5824	22.0551	23.3609	NaN	22.7901	21.6513	22.4536	22.7254
	0.423963	0.295392	P62875	P62875	DNA-directed RNA polymerases I, II, and III subunit RPABC5	POLR2L	Color2 [DarkGray]	1	4					2	2	2	29.9	29.9	29.9	7.645	0.0019148	2.8462	548840000	36	24.6633	24.3867	24.508	23.504	24.7985	23.2943	24.3212	24.1275	23.9854	23.4937	23.9294	NaN	NaN	NaN	22.2955	23.7373	23.5674	23.9024	23.4086	22.8081	23.5777	24.7989	24.5032	24.994	23.8652
	0.423284	0.14837	P00387-2;P00387;P00387-3	P00387-2;P00387;P00387-3	NADH-cytochrome b5 reductase 3;NADH-cytochrome b5 reductase 3 membrane-bound form;NADH-cytochrome b5 reductase 3 soluble form	CYB5R3	Color2 [DarkGray]	1	4					10	10	10	66.5	66.5	66.5	31.628	0	199.12	3475300000	232	25.508	25.1172	26.9662	26.1203	25.7415	26.2935	26.3969	26.6978	26.1481	26.4597	26.4103	25.8531	26.3406	26.7256	26.4748	25.9365	26.1496	26.0572	26.1863	26.0904	26.66	25.5533	25.9823	25.5891	25.4283
	0.422691	0.293546	P28331-3;P28331-4;P28331-5;P28331;P28331-2	P28331-3;P28331-4;P28331-5;P28331;P28331-2	NADH-ubiquinone oxidoreductase 75 kDa subunit, mitochondrial	NDUFS1	Color2 [DarkGray]	1	4					12	12	12	32.3	32.3	32.3	67.524	0	323.31	2354900000	260	25.2006	24.668	26.4902	25.2109	24.2084	26.0638	25.4603	25.6276	24.8438	25.7992	25.7677	25.358	26.2404	26.2013	26.5561	25.7165	26.2633	24.7569	24.5577	26.5232	25.5979	25.2964	24.1082	24.1491	24.4487
	0.422434	-0.279558	Q9NRR3	Q9NRR3	CDC42 small effector protein 2	CDC42SE2	Color2 [DarkGray]	1	4					2	2	2	44	44	44	9.2234	0	18.52	396910000	39	22.7241	23.4444	22.3753	NaN	NaN	21.6606	22.5869	23.2998	NaN	23.6288	22.8482	23.4806	NaN	NaN	22.7931	NaN	NaN	24.0353	23.88	NaN	NaN	NaN	23.3547	23.3777	23.9429
	0.42227	0.279487	O15116	O15116	U6 snRNA-associated Sm-like protein LSm1	LSM1	Color2 [DarkGray]	1	4					3	3	3	31.6	31.6	31.6	15.179	0.00027093	4.8349	864860000	50	25.0911	24.6433	24.2742	23.9984	25.3189	24.3782	24.5471	24.4312	24.1884	24.2263	24.3945	23.9948	24.8917	NaN	23.7971	NaN	25.5653	25.1642	24.8921	23.5018	NaN	20.661	24.5358	24.8608	23.8422
	0.42203	0.297871	P10599;P10599-2	P10599;P10599-2	Thioredoxin	TXN	Color2 [DarkGray]	1	4					7	7	7	68.6	68.6	68.6	11.737	0	323.31	37912000000	406	30.7902	29.1021	27.9147	29.6853	29.8276	31.9873	29.7901	31.8461	29.7059	28.6976	29.6295	29.7647	28.7696	29.2928	28.0769	29.3521	29.7039	30.4195	29.3017	29.8267	29.2072	28.6116	30.6781	30.217	28.7986
	0.419948	0.236091	P04216	P04216	Thy-1 membrane glycoprotein	THY1	Color2 [DarkGray]	1	4					3	3	3	24.2	24.2	24.2	17.935	0	265.83	7405500000	113	28.3648	27.5592	26.514	28.6796	28.4204	27.2128	25.88	26.3838	28.4226	27.6065	27.2281	26.6411	25.991	28.3003	26.5683	27.2834	27.4852	27.8987	27.7858	25.809	28.2238	27.3762	26.6706	26.9824	27.5645
	0.419905	-0.118398	Q92973;Q92973-2;Q92973-3	Q92973;Q92973-2;Q92973-3	Transportin-1	TNPO1	Color2 [DarkGray]	1	4					20	20	15	35.9	35.9	30.5	102.35	0	323.31	1974100000	246	24.6229	24.9394	26.0385	25.8039	25.3587	25.3389	25.9843	25.4468	25.2232	25.6235	25.611	25.5852	25.3738	24.5156	25.6946	25.2289	25.6768	25.445	25.5509	26.2214	25.4957	25.257	25.5531	25.0047	25.4856
	0.41958	0.297658	Q15080;Q15080-3	Q15080;Q15080-3	Neutrophil cytosol factor 4	NCF4	Color2 [DarkGray]	1	4					11	11	11	45.1	45.1	45.1	39.031	0	108.82	893660000	177	23.5103	22.9183	23.0829	25.2118	23.9066	25.2286	24.83	24.2011	26.024	23.5591	24.6505	24.1388	24.6378	26.0281	23.6117	24.8526	24.4738	24.8958	23.2028	24.5827	24.4738	23.8608	22.8294	24.4307	23.6624
	0.419163	-0.333124	P16885	P16885	1-phosphatidylinositol 4,5-bisphosphate phosphodiesterase gamma-2	PLCG2	Color2 [DarkGray]	1	4					24	24	24	29.6	29.6	29.6	147.87	0	280.92	1362000000	286	22.6135	26.1729	26.1045	24.1506	25.1629	23.8635	NaN	24.8322	22.1648	25.3687	23.5359	23.374	25.1744	24.0447	26.2475	23.5973	24.8215	24.125	26.3143	25.7609	24.8542	24.8447	24.3742	24.6444	25.3496
	0.418502	-0.0893924	P49591	P49591	Serine--tRNA ligase, cytoplasmic	SARS	Color2 [DarkGray]	1	4					17	17	17	36	36	36	58.777	0	323.31	3391700000	272	26.2949	26.6561	26.3966	26.3929	26.4647	26.3204	26.2433	26.3794	25.5093	26.4569	25.7561	26.0547	26.6858	25.7534	26.2604	25.863	26.3886	26.4078	26.3666	25.9332	26.0539	26.7153	26.5526	26.4851	26.1635
	0.4185	0.183705	Q6P1A2;Q6P1A2-2	Q6P1A2;Q6P1A2-2	Lysophospholipid acyltransferase 5	LPCAT3	Color2 [DarkGray]	1	4					2	2	2	7.8	7.8	7.8	56.034	0	67.53	255030000	35	23.145	20.921	23.0658	22.387	NaN	23.3529	23.4167	22.4716	22.8382	22.83	23.1298	22.6446	23.0653	23.5035	23.4118	21.7385	21.8131	22.4485	22.3723	23.1027	22.7197	22.5797	NaN	NaN	22.5795
	0.41815	0.468415	P55084-2;P55084	P55084-2;P55084	Trifunctional enzyme subunit beta, mitochondrial;3-ketoacyl-CoA thiolase	HADHB	Color2 [DarkGray]	1	4					10	10	10	33.4	33.4	33.4	48.879	0	27.476	936430000	123	22.5635	NaN	24.8671	22.8478	21.8055	25.1757	24.5594	24.817	22.9717	24.6277	25.0274	23.9234	24.9968	25.0913	25.9924	24.0216	24.6439	22.7277	NaN	26.1192	24.5194	23.5032	21.4804	22.5667	NaN
	0.41794	0.221326	Q13492-4;Q13492-3;Q13492-2;Q13492-5;Q13492;O60641-3;O60641-4;O60641	Q13492-4;Q13492-3;Q13492-2;Q13492-5;Q13492	Phosphatidylinositol-binding clathrin assembly protein	PICALM	Color2 [DarkGray]	1	4					7	7	7	23.2	23.2	23.2	59.918	0	168.74	1069300000	120	23.9451	23.7732	23.7708	24.3954	23.3225	24.7174	25.1719	24.5851	24.9228	24.0937	24.6809	24.7852	24.5548	25.2428	24.3818	26.15	25.4317	24.1683	NaN	24.7743	24.5771	23.7397	22.8164	23.7047	24.2367
	0.417868	0.107298	P63244	P63244	Guanine nucleotide-binding protein subunit beta-2-like 1;Guanine nucleotide-binding protein subunit beta-2-like 1, N-terminally processed	GNB2L1	Color2 [DarkGray]	1	4					14	14	14	65	65	65	35.076	0	323.31	22739000000	927	29.5661	28.7786	29.2014	29.5173	29.2904	28.8527	28.8891	29.3664	28.8242	29.0611	29.1937	28.7563	28.8155	28.8208	29.5666	28.058	28.0395	29.1955	29.3936	29.3716	28.5735	29.2444	29.2961	29.1243	29.2594
	0.417853	-0.154468	Q9H0Q0	Q9H0Q0	Protein FAM49A	FAM49A	Color2 [DarkGray]	1	4					9	7	7	42.4	35.6	35.6	37.312	0	90.891	372430000	62	22.8566	22.8429	23.1994	22.5585	22.5892	22.8776	23.244	23.582	23.1153	22.3604	22.804	22.8195	23.9242	23.034	23.3994	22.7202	NaN	23.6861	22.9331	23.7099	22.8702	22.8587	22.6874	24.3076	22.7884
	0.417344	0.181881	P60981;P60981-2	P60981;P60981-2	Destrin	DSTN	Color2 [DarkGray]	1	4					6	6	6	49.1	49.1	49.1	18.506	0	51.207	2385400000	143	26.127	26.483	24.1085	26.3342	25.8903	25.477	25.9981	25.5051	26.7633	25.5574	25.4364	25.9439	25.2203	26.7445	25.5529	24.0224	25.3591	26.425	25.5179	25.0849	25.8604	25.9957	24.8167	25.4917	25.9183
	0.417226	0.22488	P52292	P52292	Importin subunit alpha-1	KPNA2	Color2 [DarkGray]	1	4					6	6	6	21.9	21.9	21.9	57.861	0	63.313	293930000	66	21.8043	23.6221	22.2511	23.5759	23.8261	23.3094	22.8233	21.7282	21.7088	23.3803	22.509	23.0752	23.8674	NaN	NaN	21.9318	21.3978	23.1067	22.9246	23.3853	22.8355	22.6837	23.2925	23.1662	22.1963
	0.416139	0.122794	P37837	P37837	Transaldolase	TALDO1	Color2 [DarkGray]	1	4					7	7	7	21.4	21.4	21.4	37.54	0	164.35	10791000000	176	28.5108	27.4082	27.9606	28.5696	28.3841	28.493	27.4131	28.1579	28.2059	27.8361	27.7223	28.0348	28.3951	28.2488	27.9798	27.125	26.9798	28.0337	28.1215	27.6417	28.2732	28.4302	28.5757	27.7942	27.5126
	0.415467	-0.106375	Q13283;Q13283-2	Q13283	Ras GTPase-activating protein-binding protein 1	G3BP1	Color2 [DarkGray]	1	4					8	8	8	26.8	26.8	26.8	52.164	0	294.58	3811000000	341	26.1441	25.8406	26.3769	26.7585	26.312	26.2966	26.6588	26.3107	26.2829	26.3659	25.9516	26.364	26.5518	26.0544	25.9769	25.6589	26.2155	26.6472	26.3104	26.4492	26.2683	26.6838	26.8257	27.076	25.99
	0.415445	0.14669	Q13637	Q13637	Ras-related protein Rab-32	RAB32	Color2 [DarkGray]	1	4					3	3	2	19.1	19.1	14.2	24.997	0	27.069	466240000	67	23.1292	22.6562	24.2455	24.0059	23.7558	23.9261	23.4197	23.6785	24.0434	23.1911	23.6018	23.0839	24.2724	23.6243	NaN	23.7477	22.8161	23.983	23.7269	23.6594	23.3923	23.5945	23.4666	23.902	22.874
	0.415151	0.121443	P04424;P04424-2;P04424-3	P04424;P04424-2;P04424-3	Argininosuccinate lyase	ASL	Color2 [DarkGray]	1	4					4	4	4	13.8	13.8	13.8	51.657	0	15.519	263810000	64	22.2542	22.6119	23.1761	22.9281	23.1503	22.6548	22.7518	22.9675	23.0512	22.8042	22.0529	22.4875	22.9582	22.9046	22.2776	22.7185	21.788	22.5663	22.8609	22.4964	23.0128	22.974	22.3067	22.3581	22.9534
	0.415104	-0.21877	P05386	P05386	60S acidic ribosomal protein P1	RPLP1	Color2 [DarkGray]	1	4					5	4	4	94.7	79.8	79.8	11.514	0	323.31	40946000000	351	30.9449	29.3209	29.3399	30.0927	30.5389	29.4063	29.9693	28.4717	30.4229	30.044	30.2195	29.3941	29.3252	28.7333	29.2433	30.7337	29.0072	30.1622	30.3337	29.2056	30.4438	30.0851	30.1988	30.322	30.1635
	0.414559	-0.324191	Q9BZQ8	Q9BZQ8	Protein Niban	FAM129A	Color2 [DarkGray]	1	4					12	12	12	20.5	20.5	20.5	103.13	0	153.62	510910000	81	23.0587	21.6058	21.1268	23.3897	21.6806	24.8409	NaN	23.7451	24.0439	24.0626	22.0959	23.65	25.4102	23.595	23.513	23.5929	23.5323	23.9324	NaN	24.1158	23.4478	24.0894	23.2833	23.5748	23.1765
	0.414519	-0.257644	Q16666-3;Q16666-6;Q16666-2;Q16666;Q6K0P9-6;Q6K0P9-5;Q6K0P9-4;Q6K0P9-3;Q6K0P9-2;Q6K0P9	Q16666-3;Q16666-6;Q16666-2;Q16666	Gamma-interferon-inducible protein 16	IFI16	Color2 [DarkGray]	1	4					13	13	13	25.1	25.1	25.1	75.935	0	210.98	1761300000	158	25.1358	24.2155	26.2799	24.142	23.4985	25.077	25.0028	25.2867	23.6052	25.8542	24.9925	24.7813	24.8794	23.9155	26.4458	24.2962	23.895	23.9507	24.5225	26.9509	23.9895	25.7288	25.431	25.2941	25.2668
	0.413719	-0.151936	Q9UNM6;Q9UNM6-2	Q9UNM6;Q9UNM6-2	26S proteasome non-ATPase regulatory subunit 13	PSMD13	Color2 [DarkGray]	1	4					13	13	13	48.9	48.9	48.9	42.945	0	323.31	2097700000	248	25.4252	25.9604	25.0728	25.53	26.0781	25.5521	25.0631	25.2717	25.0206	25.4048	24.959	25.9273	25.5107	24.1792	25.3582	26.4049	26.3637	25.4881	25.5374	25.5556	27.002	25.5962	25.66	24.7771	25.2451
	0.413248	0.203774	O75347;O75347-2	O75347;O75347-2	Tubulin-specific chaperone A	TBCA	Color2 [DarkGray]	1	4					4	4	4	33.3	33.3	33.3	12.855	0	48.807	3598500000	57	27.097	26.7609	25.7646	27.4889	27.0231	26.3301	26.7132	26.6321	26.2807	26.2083	NaN	26.6248	26.8611	26.1556	25.9681	25.5493	25.069	27.4323	26.771	25.7345	25.4987	26.4902	27.1172	27.1904	26.413
	0.412758	0.291411	Q01469;A8MUU1	Q01469	Fatty acid-binding protein, epidermal	FABP5	Color2 [DarkGray]	1	4					5	5	5	54.1	54.1	54.1	15.164	0	323.31	11391000000	316	29.4401	28.1446	27.4866	28.6841	28.3841	28.121	27.3469	29.4952	26.4806	26.7584	27.2263	27.2218	28.5581	28.0461	27.7975	26.1002	26.5721	28.2954	28.2248	28.4087	27.1613	27.4227	28.8578	28.7464	27.9023
	0.412626	-0.189426	Q9Y266	Q9Y266	Nuclear migration protein nudC	NUDC	Color2 [DarkGray]	1	4					4	4	4	21.1	21.1	21.1	38.242	0	31.495	256390000	48	23.1615	22.5179	21.8007	22.624	NaN	23.9733	22.7511	22.6466	23.1016	22.367	22.813	22.1533	22.1632	23.238	21.8466	22.4863	22.2026	22.6484	22.1517	22.5996	NaN	23.233	23.2458	23.1618	22.3655
	0.412562	1.15795	Q99715;Q99715-4;Q99715-2	Q99715;Q99715-4;Q99715-2	Collagen alpha-1(XII) chain	COL12A1	Color2 [DarkGray]	1	4					69	69	69	37.7	37.7	37.7	333.14	0	323.31	19004000000	749	21.9165	NaN	25.2803	26.0718	NaN	25.4093	23.9001	22.5934	29.1911	29.4178	29.22	28.0351	28.3854	28.1356	28.7963	23.4122	30.2238	NaN	23.6469	22.5891	27.3725	20.5638	19.4694	NaN	27.0693
	0.412336	0.31354	P01008;CON__P41361	P01008	Antithrombin-III	SERPINC1	Color2 [DarkGray]	1	4					12	12	12	40.9	40.9	40.9	52.602	0	179.03	1149700000	110	23.3458	24.0636	24.1272	24.865	25.1294	24.9895	NaN	23.1505	25.0882	23.8721	25.1133	24.4651	24.7834	24.8483	25.5241	25.158	25.892	23.813	23.3764	23.6535	25.3204	24.5118	23.3336	23.1302	24.2854
	0.4121	0.153739	A6NDU8	A6NDU8	UPF0600 protein C5orf51	C5orf51	Color2 [DarkGray]	1	4					2	2	2	7.8	7.8	7.8	33.62	0	10.169	92794000	42	21.1632	21.7353	21.4648	21.5787	22.3678	21.266	21.8394	NaN	22.251	NaN	NaN	21.4804	21.6469	NaN	21.4153	NaN	20.6049	22.5673	20.8867	21.2642	21.7978	21.7086	21.1785	21.2101	21.6882
	0.41151	-0.290365	Q14005-3;Q14005-2;Q14005;Q14005-4	Q14005-3;Q14005-2;Q14005;Q14005-4	Pro-interleukin-16;Interleukin-16	IL16	Color2 [DarkGray]	1	4					13	13	13	39.6	39.6	39.6	66.646	0	323.31	16409000000	294	28.8542	29.4199	29.0491	28.5146	29.0445	26.834	27.2494	28.0403	26.577	28.8019	27.1509	28.5469	28.2959	27.0293	29.0368	27.6461	26.9399	28.6897	29.4449	28.2841	27.8791	29.7495	28.8777	28.8014	29.1111
	0.41089	0.224694	Q9H840	Q9H840	Gem-associated protein 7	GEMIN7	Color2 [DarkGray]	1	4					2	2	2	35.1	35.1	35.1	14.536	0.00050981	3.689	107150000	72	21.9597	21.4993	22.0659	21.9377	21.5353	20.9504	21.5357	20.1092	21.0253	20.7908	21.2724	21.0724	20.924	20.1421	NaN	20.8242	20.6954	21.4517	21.8689	20.8482	21.1413	21.1244	21.509	21.2361	20.204
	0.410755	-0.118357	P40616-2;P40616	P40616-2;P40616	ADP-ribosylation factor-like protein 1	ARL1	Color2 [DarkGray]	1	4					5	5	5	44.5	44.5	44.5	18.565	0	323.31	805180000	117	NaN	23.6883	23.5426	24.3443	24.1152	24.0613	23.9949	24.2185	24.2433	23.81	24.2119	24.0608	24.2116	22.9597	23.694	24.7412	24.8804	23.8465	24.1833	24.5253	24.3179	23.8609	23.4414	24.2221	24.2353
	0.410527	-0.167947	O94776;O94776-2	O94776;O94776-2	Metastasis-associated protein MTA2	MTA2	Color2 [DarkGray]	1	4					7	7	6	13.6	13.6	12.1	75.022	0	183.43	1180800000	145	24.0631	23.8641	25.4736	25.3973	25.2264	24.65	24.6655	24.5559	24.0267	25.2279	24.2219	24.9874	24.3427	23.4248	25.2493	23.6326	23.7191	24.7152	24.8781	25.4332	24.4269	24.5462	25.0748	24.991	25.3477
	0.409898	0.117743	P22392-2;P22392;O60361	P22392-2;P22392	Nucleoside diphosphate kinase B	NME2	Color2 [DarkGray]	1	4					9	9	3	52.8	52.8	16.5	30.137	0	109.86	12659000000	326	28.9125	28.8648	27.8489	28.3588	27.4536	28.1543	28.4398	28.9288	28.135	28.2737	28.118	28.1035	28.1413	27.9625	28.3532	28.3506	27.9454	28.1993	28.1059	27.899	28.6248	27.881	28.6653	28.5564	27.8887
	0.409582	-0.318275	P04196	P04196	Histidine-rich glycoprotein	HRG	Color2 [DarkGray]	1	4					6	6	6	14.1	14.1	14.1	59.578	0	164.74	1189300000	171	22.8795	24.3672	24.1851	24.0656	23.9283	23.7033	23.142	23.7891	25.4452	24.0679	24.6132	24.5048	24.2762	23.4529	23.2764	25.2082	26.831	22.3606	23.8046	23.4801	23.7509	23.9403	23.4875	23.274	23.7452
	0.40934	0.19694	Q70J99-3;Q70J99;Q70J99-2	Q70J99-3;Q70J99	Protein unc-13 homolog D	UNC13D	Color2 [DarkGray]	1	4					13	13	13	17.1	17.1	17.1	128.82	0	164.58	896570000	98	23.8601	24.5299	24.036	24.849	25.4493	23.657	24.1439	24.8797	24.41	24.2353	24.1654	25.0696	24.1917	24.8751	23.9619	24.2531	22.3699	24.8644	24.5485	24.1764	23.8019	24.4106	23.8777	24.5372	24.626
	0.409025	0.234562	Q9BYD3-2;Q9BYD3	Q9BYD3-2;Q9BYD3	39S ribosomal protein L4, mitochondrial	MRPL4	Color2 [DarkGray]	1	4					3	3	3	17.1	17.1	17.1	29.502	0	6.7407	278390000	32	22.4085	21.9833	23.4468	23.356	NaN	22.5844	NaN	NaN	NaN	23.2784	23.3312	22.9539	NaN	23.7505	23.7566	22.6428	22.0812	22.5074	22.6394	23.6533	23.5218	NaN	NaN	23.1312	NaN
	0.408903	0.32634	P24844;P24844-2	P24844;P24844-2	Myosin regulatory light polypeptide 9	MYL9	Color2 [DarkGray]	1	4					10	4	4	79.7	41.3	41.3	19.827	0	323.31	2268900000	71	24.6461	26.1699	NaN	26.6736	24.32	25.6692	NaN	24.8616	27.3266	25.6593	26.4441	25.7589	24.8482	27.2065	25.5919	24.9105	25.9021	26.4399	25.231	22.7573	25.5734	NaN	25.001	NaN	26.0501
	0.408755	-0.135287	Q9Y3I1-3;Q9Y3I1-2;Q9Y3I1	Q9Y3I1-3;Q9Y3I1-2;Q9Y3I1	F-box only protein 7	FBXO7	Color2 [DarkGray]	1	4					4	4	4	15	15	15	45.78	0	74.071	408170000	115	NaN	23.541	24.0717	22.9221	23.9542	23.1564	22.5287	23.3994	22.6549	23.4551	22.6716	23.6172	22.8765	23.1034	22.7341	23.0022	23.6816	23.739	24.0509	23.5592	23.2825	23.7436	23.3864	22.9542	23.531
	0.408222	0.156734	Q9H6Z4-3;Q9H6Z4-2;Q9H6Z4	Q9H6Z4-3;Q9H6Z4-2;Q9H6Z4	Ran-binding protein 3	RANBP3	Color2 [DarkGray]	1	4					3	3	3	10.8	10.8	10.8	53.41	0	104.83	242910000	28	22.9871	22.7042	23.0701	23.5224	NaN	23.6773	23.2785	NaN	22.9553	23.3337	23.2338	23.1954	NaN	NaN	22.7928	NaN	22.5254	NaN	NaN	22.5934	23.6766	23.9009	23.4643	NaN	23.0082
	0.407496	0.254279	Q9HAV0	Q9HAV0	Guanine nucleotide-binding protein subunit beta-4	GNB4	Color2 [DarkGray]	1	4					8	4	4	38.8	22.4	22.4	37.567	0	45.392	472310000	87	24.0293	23.9031	22.4563	22.7121	21.8723	23.6947	22.9563	24.8125	23.4865	23.14	23.3389	22.5225	24.9842	23.2022	22.3076	24.4571	24.6188	23.6477	22.186	23.9707	23.3566	21.7432	22.981	23.4534	NaN
	0.406618	-0.264828	O75439	O75439	Mitochondrial-processing peptidase subunit beta	PMPCB	Color2 [DarkGray]	1	4					4	4	4	16	16	16	54.366	0	82.153	206070000	47	NaN	21.2616	22.3185	NaN	NaN	22.0939	22.39	21.34	21.5253	21.5798	22.5236	21.3608	21.8044	22.5437	21.4083	24.1416	24.3685	NaN	21.141	22.2195	22.0444	NaN	21.0213	21.467	21.2428
	0.406448	0.0835342	Q15019;Q15019-3;Q15019-2	Q15019;Q15019-3;Q15019-2	Septin-2	SEPT2	Color2 [DarkGray]	1	4					10	10	9	46.5	46.5	42.1	41.487	0	323.31	7154700000	347	26.9568	27.5818	27.8817	27.5606	27.2611	27.6106	27.0811	27.3048	26.9514	27.5955	27.2809	27.3894	27.4212	27.3377	27.4417	26.548	27.847	27.0278	27.6498	26.9271	27.2245	27.2919	27.5661	27.3286	27.2096
	0.406294	-0.259142	Q15027	Q15027	Arf-GAP with coiled-coil, ANK repeat and PH domain-containing protein 1	ACAP1	Color2 [DarkGray]	1	4					14	14	14	25.8	25.8	25.8	81.535	0	323.31	1895400000	209	24.3414	25.9491	26.4897	25.0573	26.2821	23.6384	24.7133	25.1533	24.1305	25.6994	24.4018	26.4567	24.5258	NaN	25.403	25.0155	24.888	25.1999	26.3139	24.9842	24.0073	26.7124	25.8684	25.9552	26.0683
	0.406243	0.24265	O43148;O43148-2	O43148;O43148-2	mRNA cap guanine-N7 methyltransferase	RNMT	Color2 [DarkGray]	1	4					2	2	2	6.1	6.1	6.1	54.843	0	18.497	118200000	23	21.7025	20.7222	22.8612	22.0548	22.2928	21.9423	NaN	NaN	NaN	22.5125	21.3453	22.7522	NaN	NaN	22.3838	NaN	21.291	21.8744	20.1612	NaN	22.2365	NaN	22.0476	NaN	NaN
	0.406176	-0.271443	P98179	P98179	RNA-binding protein 3	RBM3	Color2 [DarkGray]	1	4					2	2	2	31.8	31.8	31.8	17.17	0	63.998	10740000000	154	27.7982	29.2486	28.7173	27.9159	27.9216	27.4489	25.9339	26.1586	26.6718	27.4503	25.69	25.9913	26.4467	26.1214	26.7153	27.3453	27.7041	27.1388	27.9847	27.4466	29.2455	27.9805	26.8921	28.3434	27.444
	0.404209	-0.731407	P19827;P19827-2;P19827-3	P19827;P19827-2;P19827-3	Inter-alpha-trypsin inhibitor heavy chain H1	ITIH1	Color2 [DarkGray]	1	4					16	16	15	30.8	30.8	29.4	101.39	0	323.31	4693900000	260	22.0197	21.3844	20.6925	24.1355	25.1216	25.3801	NaN	23.6095	28.1753	26.4605	26.3543	26.9214	25.1658	28.5313	25.0631	27.0501	27.4332	NaN	23.111	24.4659	28.5014	26.1015	NaN	20.9518	27.5456
	0.403173	-0.174583	Q9NVE7	Q9NVE7	Pantothenate kinase 4	PANK4	Color2 [DarkGray]	1	4					5	5	5	11.8	11.8	11.8	85.99	0	58.253	317260000	50	21.751	24.0342	23.465	22.9931	23.3367	22.7214	NaN	22.767	22.2269	23.0456	22.2825	NaN	22.8564	NaN	22.8343	24.2754	22.2394	23.3983	23.3471	22.96	22.649	23.2654	22.7898	23.1985	23.0834
	0.402773	0.285983	P52790	P52790	Hexokinase-3	HK3	Color2 [DarkGray]	1	4					22	22	19	37.4	37.4	33.8	99.024	0	323.31	5265700000	438	26.9654	25.8778	23.7182	26.3423	26.6938	27.6075	27.6761	27.2456	28.5435	25.7406	26.6683	27.1148	27.8849	28.075	26.2863	27.5035	26.5155	27.4642	25.9315	27.3477	26.5043	25.5456	26.5855	26.8902	26.6424
	0.401935	0.155928	P06576	P06576	ATP synthase subunit beta, mitochondrial	ATP5B	Color2 [DarkGray]	1	4					26	26	26	73.9	73.9	73.9	56.559	0	323.31	76011000000	1998	30.2424	29.3875	31.1287	29.984	30.2201	31.2233	30.7754	30.7971	30.4224	30.3192	30.9434	30.3726	31.1644	30.9915	31.2344	30.3247	30.748	30.3595	29.6385	31.2745	30.5787	30.7987	30.0295	30.1519	29.8512
	0.401235	0.26157	Q03519;Q03519-2	Q03519;Q03519-2	Antigen peptide transporter 2	TAP2	Color2 [DarkGray]	1	4					8	8	8	18.8	18.8	18.8	75.663	0	157.63	937530000	80	24.2629	NaN	24.6927	24.1099	24.4562	25.2671	24.8483	24.3399	NaN	23.8549	24.2843	24.1926	24.9628	23.1029	24.1777	21.7156	22.1952	25.3816	24.017	26.6863	24.1097	24.1792	24.2221	24.4191	24.2725
	0.401086	0.172735	P36543;P36543-2;P36543-3	P36543;P36543-2	V-type proton ATPase subunit E 1	ATP6V1E1	Color2 [DarkGray]	1	4					5	5	5	25.7	25.7	25.7	26.145	0	178.47	2815300000	230	26.1765	27.3545	24.898	25.354	25.3053	26.1679	25.8744	26.2996	25.638	25.2248	25.1994	25.5874	25.7648	25.1806	24.5855	26.5599	25.8556	26.2797	24.8077	25.6511	25.6136	25.3542	25.7404	25.4684	25.0444
	0.400949	-0.0921707	P50991;P50991-2	P50991;P50991-2	T-complex protein 1 subunit delta	CCT4	Color2 [DarkGray]	1	4					17	17	17	50.1	50.1	50.1	57.924	0	323.31	13051000000	497	28.3684	28.6648	28.47	28.2912	28.2235	28.0014	27.8922	28.3261	27.3498	28.3375	27.7372	28.141	27.9162	28.1273	28.6049	27.8875	27.9877	28.3634	28.2478	28.4296	27.7159	28.2596	28.6374	28.1853	28.0173
	0.400205	0.232905	P33316-2;P33316	P33316-2;P33316	Deoxyuridine 5-triphosphate nucleotidohydrolase, mitochondrial	DUT	Color2 [DarkGray]	1	4					4	4	4	35.4	35.4	35.4	17.748	0	277.74	1332200000	104	25.1759	25.3449	25.0469	26.0072	24.9208	24.9865	25.1553	24.6793	23.9994	25.5587	24.4942	24.792	24.8868	23.9429	24.2463	24.5097	23.4406	25.3852	25.0193	25.0403	23.551	24.9293	26.0846	25.584	24.3757
	0.399031	0.331394	P23381;P23381-2	P23381;P23381-2	Tryptophan--tRNA ligase, cytoplasmic;T1-TrpRS;T2-TrpRS	WARS	Color2 [DarkGray]	1	4					23	23	23	73.7	73.7	73.7	53.165	0	323.31	24847000000	787	30.4726	27.5134	27.6873	28.9833	28.8552	30.7618	29.3043	31.4561	27.5913	28.125	27.833	28.3201	30.027	27.3745	27.7959	28.0512	27.3948	30.3994	28.0604	29.8001	27.6891	28.1048	29.4148	29.6944	28.0509
	0.39903	-0.0988544	P62140	P62140	Serine/threonine-protein phosphatase PP1-beta catalytic subunit	PPP1CB	Color2 [DarkGray]	1	4					12	3	3	52.3	20.8	20.8	37.186	0	32.733	1344900000	160	24.0541	24.7862	24.3915	24.7214	24.9606	24.2973	24.4462	24.296	24.4357	24.2279	24.4646	24.4308	24.1173	24.2558	23.9162	25.0564	24.5434	24.5408	24.7547	23.963	23.8588	24.5028	24.4969	24.7359	24.7675
	0.398549	-0.144704	Q08211;Q08211-2	Q08211	ATP-dependent RNA helicase A	DHX9	Color2 [DarkGray]	1	4					29	29	29	34.2	34.2	34.2	140.96	0	323.31	10836000000	670	26.8523	27.2822	28.4641	28.0075	27.7389	27.887	27.7225	27.6255	27.1864	28.2162	27.8584	28.3778	27.8145	27.9923	28.7652	27.3239	27.9743	27.1385	27.2857	28.7403	28.0257	27.9733	27.9312	27.5378	28.318
	0.398186	-0.133523	Q15233;Q15233-2	Q15233;Q15233-2	Non-POU domain-containing octamer-binding protein	NONO	Color2 [DarkGray]	1	4					8	8	8	34	34	34	54.231	0	323.31	12974000000	307	27.4176	28.13	28.5867	28.5333	27.7262	27.6427	27.9251	27.6988	27.3427	28.4624	27.8152	28.4508	27.8602	27.0399	28.6812	27.619	27.3956	27.6073	28.0488	28.6644	28.7415	27.8085	28.0146	28.0917	28.1178
	0.397319	-0.118602	B5ME19;Q99613;Q99613-2	B5ME19;Q99613;Q99613-2	Eukaryotic translation initiation factor 3 subunit C-like protein;Eukaryotic translation initiation factor 3 subunit C	EIF3CL;EIF3C	Color2 [DarkGray]	1	4					13	13	13	19.1	19.1	19.1	105.47	0	323.31	2816400000	218	25.8109	26.1258	26.4162	26.6982	26.4721	25.8307	25.7435	25.8718	24.9262	26.0838	25.1247	26.3847	25.9614	25.8376	26.4343	25.3141	25.3448	26.0857	26.4993	26.3838	25.7236	26.3499	26.1798	26.3103	26.3383
	0.397045	-0.405514	Q02952;Q02952-3;Q02952-2	Q02952;Q02952-3;Q02952-2	A-kinase anchor protein 12	AKAP12	Color2 [DarkGray]	1	4					9	9	9	12.6	12.6	12.6	191.48	0	166.87	788780000	96	21.8443	22.8545	NaN	22.8581	20.4754	24.4028	23.4696	22.3666	25.3631	23.4334	24.0537	23.5219	23.5048	25.737	24.1272	23.9262	25.9422	24.2869	22.7527	NaN	25.949	23.5885	22.4416	NaN	24.4182
	0.397009	0.383812	P28907;P28907-2	P28907;P28907-2	ADP-ribosyl cyclase/cyclic ADP-ribose hydrolase 1	CD38	Color2 [DarkGray]	1	4					4	4	4	15	15	15	34.328	0	36.554	1047100000	35	26.3701	NaN	NaN	25.2996	NaN	24.2895	25.6135	26.0696	23.2991	25.074	23.385	24.754	25.3994	NaN	24.1893	24.8364	NaN	25.2698	24.6078	25.1796	NaN	26.0095	25.3225	25.4149	25.0787
	0.396918	-0.177749	P52888	P52888	Thimet oligopeptidase	THOP1	Color2 [DarkGray]	1	4					6	6	4	15.1	15.1	10.4	78.839	0	41.596	346810000	55	22.8759	23.4434	NaN	24.0979	22.4763	23.121	22.8311	22.85	21.8789	23.5014	23.3988	23.812	NaN	22.1267	23.0922	NaN	21.8698	23.0973	23.6481	22.6831	23.4762	NaN	23.5266	NaN	22.8226
	0.396044	-0.153786	Q86UE4	Q86UE4	Protein LYRIC	MTDH	Color2 [DarkGray]	1	4					11	11	11	28.7	28.7	28.7	63.836	0	274.37	1583500000	159	23.5816	24.6432	24.8934	25.6903	24.7564	25.6344	25.9602	24.7647	25.4233	24.6814	25.1405	24.7912	24.8876	25.3222	25.574	25.1676	26.0051	25.5244	24.4837	25.7468	25.5106	24.3878	24.8487	25.109	25.6624
	0.395306	-0.364494	Q6F5E8-2;Q6F5E8	Q6F5E8-2;Q6F5E8	Leucine-rich repeat-containing protein 16C	RLTPR	Color2 [DarkGray]	1	4					9	9	9	10.5	10.5	10.5	148.21	0	20.597	464070000	60	22.0208	25.0527	24.3549	23.0686	24.162	20.526	22.4338	NaN	NaN	23.7539	NaN	23.1857	22.8085	NaN	23.9495	22.937	NaN	23.0009	24.2492	23.4126	21.8855	25.4092	23.1552	23.5249	24.4259
	0.394334	-0.160234	P42285	P42285	Superkiller viralicidic activity 2-like 2	SKIV2L2	Color2 [DarkGray]	1	4					6	6	6	8.8	8.8	8.8	117.8	0	178.7	390260000	68	23.1625	22.6803	22.6422	23.1244	22.4546	23.4449	23.4085	22.9091	22.6252	23.4291	23.0324	24.0779	22.3573	22.9886	23.9157	22.308	22.137	22.856	NaN	23.1648	23.1369	23.3968	23.2562	23.0526	23.7928
	0.393887	-0.20834	Q13303-4;Q13303-2;Q13303;Q13303-5;Q13303-3;Q14722-2;Q14722-3;Q14722	Q13303-4;Q13303-2;Q13303;Q13303-5;Q13303-3	Voltage-gated potassium channel subunit beta-2	KCNAB2	Color2 [DarkGray]	1	4					8	8	8	48.7	48.7	48.7	33.656	0	128.61	1072800000	109	23.3988	24.9612	23.6673	24.3057	24.9642	23.4209	NaN	24.8771	23.174	24.7674	24.0326	25.6657	24.689	22.4526	24.4844	24.2581	22.7427	24.5698	24.5561	24.2836	24.9861	24.2277	24.3529	23.9441	24.7307
	0.392831	-0.241504	P29372-5;P29372-4;P29372-2;P29372	P29372-5;P29372-4;P29372-2;P29372	DNA-3-methyladenine glycosylase	MPG	Color2 [DarkGray]	1	4					6	6	6	26	26	26	30.824	0	6.4841	321960000	38	22.1065	23.3123	24.0571	NaN	NaN	NaN	23.3557	21.1898	22.0578	23.6631	23.2153	NaN	23.421	22.5604	23.6561	23.5462	22.3562	22.9778	NaN	23.4456	NaN	23.8726	23.0592	23.3872	22.8977
	0.39245	0.245246	O60927	O60927	Protein phosphatase 1 regulatory subunit 11	PPP1R11	Color2 [DarkGray]	1	4					2	2	2	40.5	40.5	40.5	13.952	0	25.835	473910000	61	23.8062	22.9714	23.5827	23.3798	23.8659	21.5302	23.0563	23.8148	NaN	22.585	23.8579	22.4247	23.7369	22.0334	21.5783	21.4584	22.3578	23.2874	23.4095	21.5734	23.1013	22.445	22.8059	22.8281	23.2828
	0.391816	0.11274	P60510	P60510	Serine/threonine-protein phosphatase 4 catalytic subunit	PPP4C	Color2 [DarkGray]	1	4					5	4	4	23.8	19.2	19.2	35.08	0	20.952	527340000	102	23.9923	24.1785	23.4413	23.8147	23.9743	22.4621	23.238	23.7041	23.0519	23.9134	23.5006	23.6192	23.3713	23.1876	23.2333	23.1785	22.7528	23.7808	23.5735	22.6718	23.3762	23.4578	23.9732	23.8062	23.451
	0.391356	0.208086	Q9Y2B0;Q9Y2B0-2	Q9Y2B0	Protein canopy homolog 2	CNPY2	Color2 [DarkGray]	1	4					5	5	5	44	44	44	20.652	0	323.31	9114900000	207	28.1915	28.9951	26.273	27.9191	27.1398	27.6726	28.6647	27.181	27.953	26.6748	28.1086	26.8477	27.5349	27.6521	25.5396	27.746	28.0115	28.1583	27.3103	26.326	28.1471	27.3835	27.4062	27.1835	27.3636
	0.390642	-0.215543	P55039	P55039	Developmentally-regulated GTP-binding protein 2	DRG2	Color2 [DarkGray]	1	4					5	5	5	20.1	20.1	20.1	40.746	0	14.33	247080000	55	21.3334	24.1068	22.3137	21.5635	21.7961	21.992	20.8753	22.2486	NaN	22.2952	21.7303	21.8475	22.2095	21.524	21.8163	22.9488	25.0181	22.0437	21.4307	22.2721	21.9561	22.2679	21.8714	21.8292	22.4593
	0.390019	-0.130611	P51665	P51665	26S proteasome non-ATPase regulatory subunit 7	PSMD7	Color2 [DarkGray]	1	4					4	4	4	20.7	20.7	20.7	37.025	0	47.292	612990000	117	23.8683	23.9321	23.6037	23.8341	23.4353	24.157	22.9947	24.1671	23.6512	23.6668	23.0522	23.7809	23.2584	23.3802	23.9807	25.2145	22.9074	23.8383	23.3733	23.9756	23.4468	23.7183	24.1444	23.5303	23.2472
	0.389921	-0.192521	Q9Y5K5-2;Q9Y5K5-4;Q9Y5K5-3;Q9Y5K5	Q9Y5K5-2;Q9Y5K5-4;Q9Y5K5-3;Q9Y5K5	Ubiquitin carboxyl-terminal hydrolase isozyme L5	UCHL5	Color2 [DarkGray]	1	4					5	5	5	22.2	22.2	22.2	36.079	0	87.723	445120000	78	23.5039	23.4312	23.1767	24.2559	23.7478	21.7666	NaN	23.2929	23.0421	23.4339	23.3606	23.8635	23.8752	22.5686	23.8053	21.3656	NaN	23.9401	23.9016	22.7326	23.4444	24.2258	23.5781	23.6244	23.8376
	0.389564	-0.19272	P09012	P09012	U1 small nuclear ribonucleoprotein A	SNRPA	Color2 [DarkGray]	1	4					6	6	5	31.2	31.2	28.4	31.279	0	38.059	1156200000	94	25.3021	23.9602	26.1114	25.1696	24.7903	24.693	23.8391	24.2845	22.9137	24.7608	24.512	24.5286	24.4531	24.2419	24.7743	23.3092	23.8841	23.8809	24.5052	24.9543	24.8153	25.0709	24.4205	25.6478	24.9009
	0.389508	-0.153617	P04632;Q96L46	P04632	Calpain small subunit 1	CAPNS1	Color2 [DarkGray]	1	4					11	11	11	76.1	76.1	76.1	28.315	0	323.31	13306000000	712	27.7184	28.9942	27.9744	28.0418	28.298	27.5969	27.8409	27.6255	27.7152	27.558	27.5549	27.3048	27.3434	26.8851	27.0189	28.363	28.5418	27.9285	28.1095	27.1049	28.702	28.0736	28.0578	28.6548	27.7015
	0.388926	-0.318226	Q9P2I0	Q9P2I0	Cleavage and polyadenylation specificity factor subunit 2	CPSF2	Color2 [DarkGray]	1	4					4	4	4	7	7	7	88.486	0	201.59	502890000	53	20.5705	22.4459	21.4819	21.9459	23.2329	21.4318	21.8939	21.9491	NaN	22.8016	24.3529	24.0922	23.3439	24.0532	23.1751	NaN	24.9285	22.587	20.7167	22.9212	24.9405	22.5629	NaN	21.8222	23.0334
	0.387314	0.206536	Q96EP5-2;Q96EP5	Q96EP5-2;Q96EP5	DAZ-associated protein 1	DAZAP1	Color2 [DarkGray]	1	4					4	4	4	19.6	19.6	19.6	40.529	0	285.21	1255200000	97	24.3045	25.6469	25.6072	25.6423	25.1658	24.3121	24.822	24.7576	23.8903	24.6737	24.4344	24.9756	24.618	23.7088	25.2318	24.2855	24.2371	24.5461	25.4668	25.3519	24.8139	25	25.2835	25.353	25.1095
	0.386766	-0.126811	Q16401;Q16401-2	Q16401;Q16401-2	26S proteasome non-ATPase regulatory subunit 5	PSMD5	Color2 [DarkGray]	1	4					16	16	16	53.6	53.6	53.6	56.195	0	323.31	3680300000	332	25.7955	27.0343	27	26.6417	26.9343	26.2686	26.4378	25.8557	26.2365	26.0522	26.2004	26.5445	25.0103	26.0202	26.3164	26.5502	26.3425	26.8081	26.7005	26.0998	26.1576	27.0916	26.4722	26.5167	26.6633
	0.386397	-0.15888	Q16539;Q16539-2;Q16539-3;Q16539-5;Q16539-4	Q16539;Q16539-2;Q16539-3;Q16539-5;Q16539-4	Mitogen-activated protein kinase 14	MAPK14	Color2 [DarkGray]	1	4					8	8	8	35	35	35	41.293	0	21.285	687210000	125	23.9631	23.7457	24.3071	24.2041	24.2602	24.2541	24.5174	24.4505	24.6376	23.892	23.1595	24.1569	24.552	22.0168	22.4755	23.8313	24.1824	24.358	24.2386	24.2019	23.8905	24.332	23.6114	24.065	24.0373
	0.386109	-0.361433	Q9UH99-2;Q9UH99;Q9UH99-3	Q9UH99-2;Q9UH99;Q9UH99-3	SUN domain-containing protein 2	SUN2	Color2 [DarkGray]	1	4					15	15	15	36.6	36.6	36.6	82.501	0	323.31	1865900000	194	NaN	23.5277	26.1442	24.252	24.2636	24.9826	22.4829	24.5991	23.916	26.1108	24.9096	25.8945	24.8974	24.8642	26.3871	24.3256	25.7745	23.8376	24.7415	26.972	26.1773	25.9154	23.4983	22.5031	25.7061
	0.386005	0.11312	P07900;P07900-2;Q14568;Q58FG0;Q58FF6	P07900;P07900-2	Heat shock protein HSP 90-alpha	HSP90AA1	Color2 [DarkGray]	1	4					26	19	19	48.4	32.9	32.9	84.659	0	323.31	27094000000	845	29.5461	28.9718	28.4355	29.1152	29.1701	28.8485	29.2892	29.6597	28.7399	29.4141	28.975	29.3716	29.7072	29.3749	29.5464	28.3295	28.1955	29.3731	28.9562	29.1274	28.4621	29.0271	29.5605	28.588	29.0762
	0.385837	-0.155464	Q92608;Q92608-2	Q92608	Dedicator of cytokinesis protein 2	DOCK2	Color2 [DarkGray]	1	4					27	27	27	20.3	20.3	20.3	211.95	0	323.31	2290600000	293	24.9982	25.8905	26.5115	25.6695	25.3874	25.409	25.1466	25.9591	24.4244	26.1712	24.921	26.1036	25.4432	24.98	26.6409	25.0135	24.6037	26.0635	26.0786	26.2139	25.5232	25.9159	26.1707	25.419	25.9203
	0.385085	0.195771	P62851	P62851	40S ribosomal protein S25	RPS25	Color2 [DarkGray]	1	4					4	4	4	24	24	24	13.742	0	16.532	7975300000	62	27.8067	26.7227	28.7698	28.3638	27.9244	27.4455	27.8397	27.9568	27.167	27.2039	26.8078	26.8657	27.5728	27.5844	28.3879	26.471	26.7645	28.0408	28.1755	27.6158	25.7004	28.2333	28.1911	28.4457	27.3233
	0.385002	0.0971365	P31948;P31948-3;P31948-2	P31948;P31948-3;P31948-2	Stress-induced-phosphoprotein 1	STIP1	Color2 [DarkGray]	1	4					11	11	11	23.8	23.8	23.8	62.639	0	184.53	4335000000	372	26.5898	26.5359	26.452	27.0317	26.4856	26.1481	26.5992	26.5255	25.6109	26.4816	25.8027	26.9007	26.5253	26.3934	26.6722	25.8004	25.6625	26.6922	26.7384	26.3656	25.8217	26.4827	26.7717	26.572	26.3788
	0.384756	0.157587	Q04760-2;Q04760	Q04760-2;Q04760	Lactoylglutathione lyase	GLO1	Color2 [DarkGray]	1	4					6	6	6	53.3	53.3	53.3	19.043	0	160.46	2436200000	165	25.648	25.7407	25.7099	26.1932	26.2033	25.6309	25.6426	26.1436	24.8709	25.3564	25.2235	25.7586	25.5114	25.2112	26.1172	23.668	24.4083	26.1871	25.9964	24.8953	25.614	26.1566	26.2332	26.0657	25.5049
	0.384484	-0.392054	Q5TZA2;Q5TZA2-2	Q5TZA2;Q5TZA2-2	Rootletin	CROCC	Color2 [DarkGray]	1	4					2	2	2	0.9	0.9	0.9	228.52	0.00050813	3.6437	1380700000	28	25.9641	25.2881	25.4365	26.4085	24.9639	NaN	24.1194	25.5621	23.9959	23.7312	NaN	23.321	NaN	24.7412	26.3238	NaN	NaN	26.0126	26.3336	24.43	NaN	25.2886	25.9315	24.4833	25.4018
	0.384287	0.224952	P24752;P24752-2	P24752;P24752-2	Acetyl-CoA acetyltransferase, mitochondrial	ACAT1	Color2 [DarkGray]	1	4					6	6	6	24.8	24.8	24.8	45.199	0	323.31	1839100000	175	24.4387	24.5284	25.7867	23.9725	23.1149	25.6356	25.6431	25.5848	24.6431	25.2433	25.5371	24.6464	26.0385	26.075	26.315	25.2019	24.987	24.393	24.0536	25.8185	24.8393	24.9703	24.5711	24.9213	24.2488
	0.38406	0.131378	Q99497	Q99497	Protein deglycase DJ-1	PARK7	Color2 [DarkGray]	1	4					8	8	8	54.5	54.5	54.5	19.891	0	323.31	27788000000	441	30.2214	29.4253	28.0386	28.787	28.9336	28.9027	28.6426	29.484	29.0036	29.0596	28.9363	28.8149	28.8385	28.68	28.4701	28.2541	28.4736	28.7092	28.875	28.3441	28.6255	29.0157	28.8705	29.4234	28.7833
[truncated: 1,397 more rows]
[truncated: 11 more columns]

## Sheet: Sheet5
Gene names
RAB1B
PGRMC2
FAM21A
COMMD8
APOA2
GCA
AKT1S1
SKIV2L
LGALS9
EIF3A
USP9X
GNB1
IDH1
PEPD
PRDX3
FOLR2
COMMD10
IRF2BP2
CTSA
STAT5B
CPPED1
LPXN
CIAPIN1
ACP2
CTSC
HEXA
CRK
TTR
SNX3
PAK2
GNS
MMS19
RAB18
LGALS3
VAPB
FXR1
MYH9
[truncated: 2,431 more rows]

## Sheet: Sheet1
Gene names
[truncated: 2,468 more rows]

[truncated: 4 more sheets: Sheet2, Genes, Sheet6, Genes differences]
