# Supplementary figures and images for: Classic Hodgkin Lymphoma Refractory for ABVD Treatment Is Characterized by Pathologically Activated Signal Transduction Pathways as Revealed by Proteomic Profiling
Source: MDPI journal article supplement (doi:10.3390/cancers14010247), 2022-01-04

Supplementary Figure S1

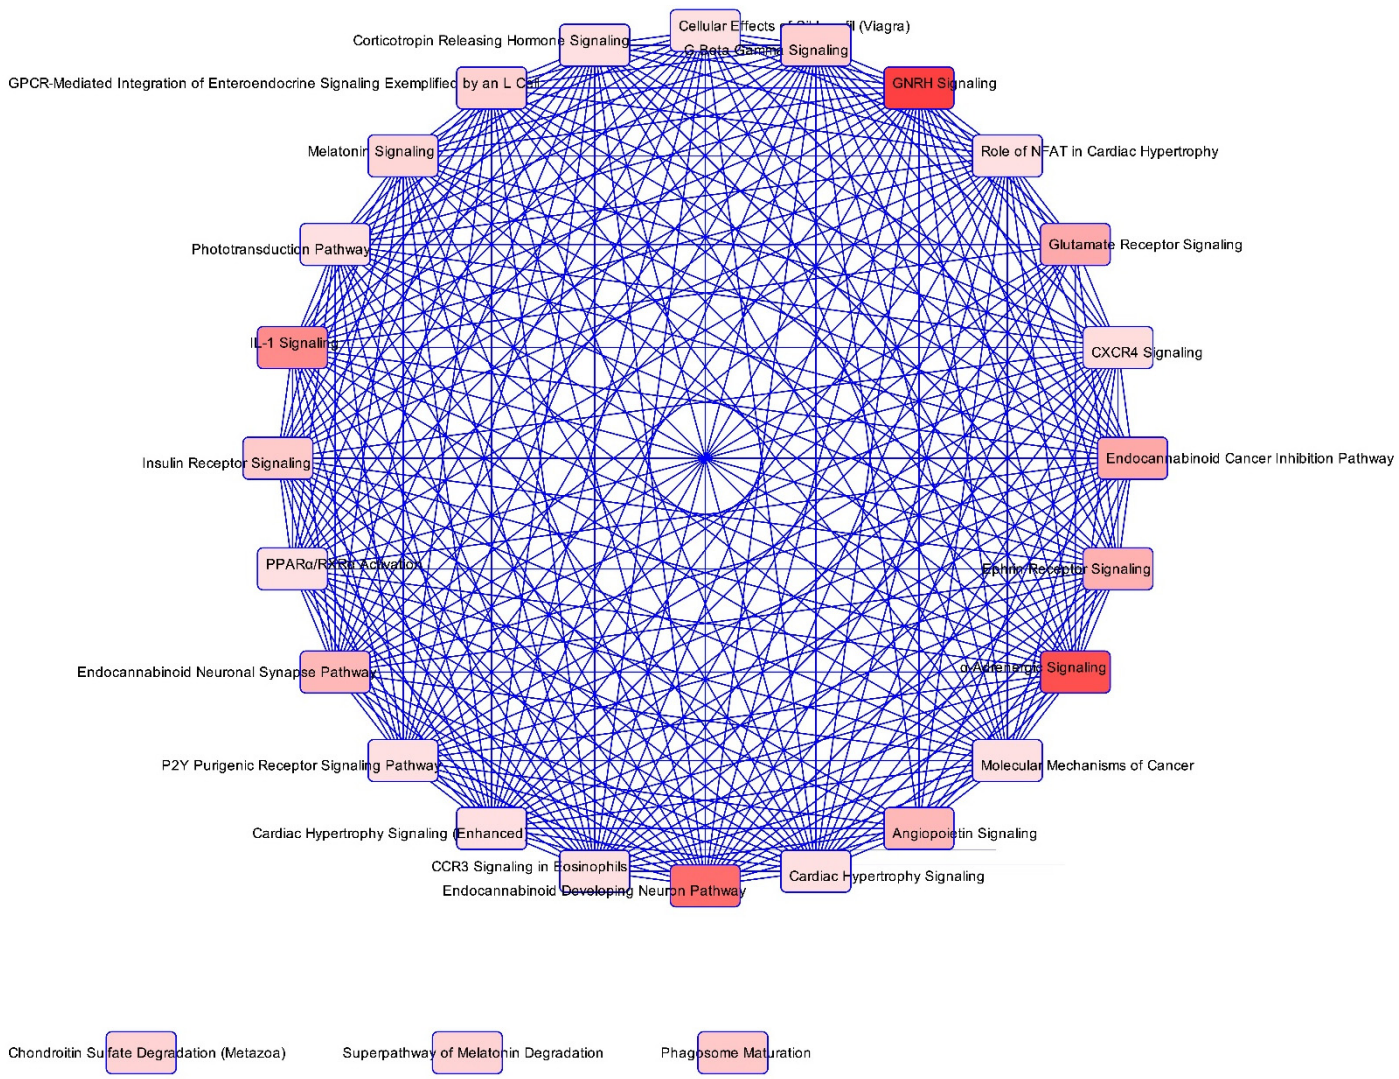

Supplement: s1 [file s1]
